# Supplementary material
Source: ML conference proceedings conference paper supplement (https://openreview.net/forum?id=ZoTcKpyL3p)

**Supplementary information for**  
**Automatic Generation of Mechanistic Pathways of Organic Reactions with Dual Templates**

Shuan Chen, Ramil Babazade, Taewan Kim, Jaesik Choi, Sunkyu Han, Yousung Jung

Correspondence: [yousung.jung@snu.ac.kr](mailto:yousung.jung@snu.ac.kr)

Contents

|                                                          |     |
|----------------------------------------------------------|-----|
| RT extension .....                                       | 2   |
| List of special groups used in RT extension.....         | 3   |
| RT-MT many-to-one correspondence .....                   | 4   |
| RT-MT one-to-many correspondence .....                   | 5   |
| Mechanism derivation beyond RT .....                     | 6   |
| Top-100 RTs.....                                         | 8   |
| Labeled data MT distribution table .....                 | 11  |
| Manual evaluation of 100 randomly sampled reactions..... | 12  |
| 100 labeled reactions from mech-USPTO-31k .....          | 13  |
| 100 reactions labeled by ELECTRO .....                   | 113 |

## S1. RT extension

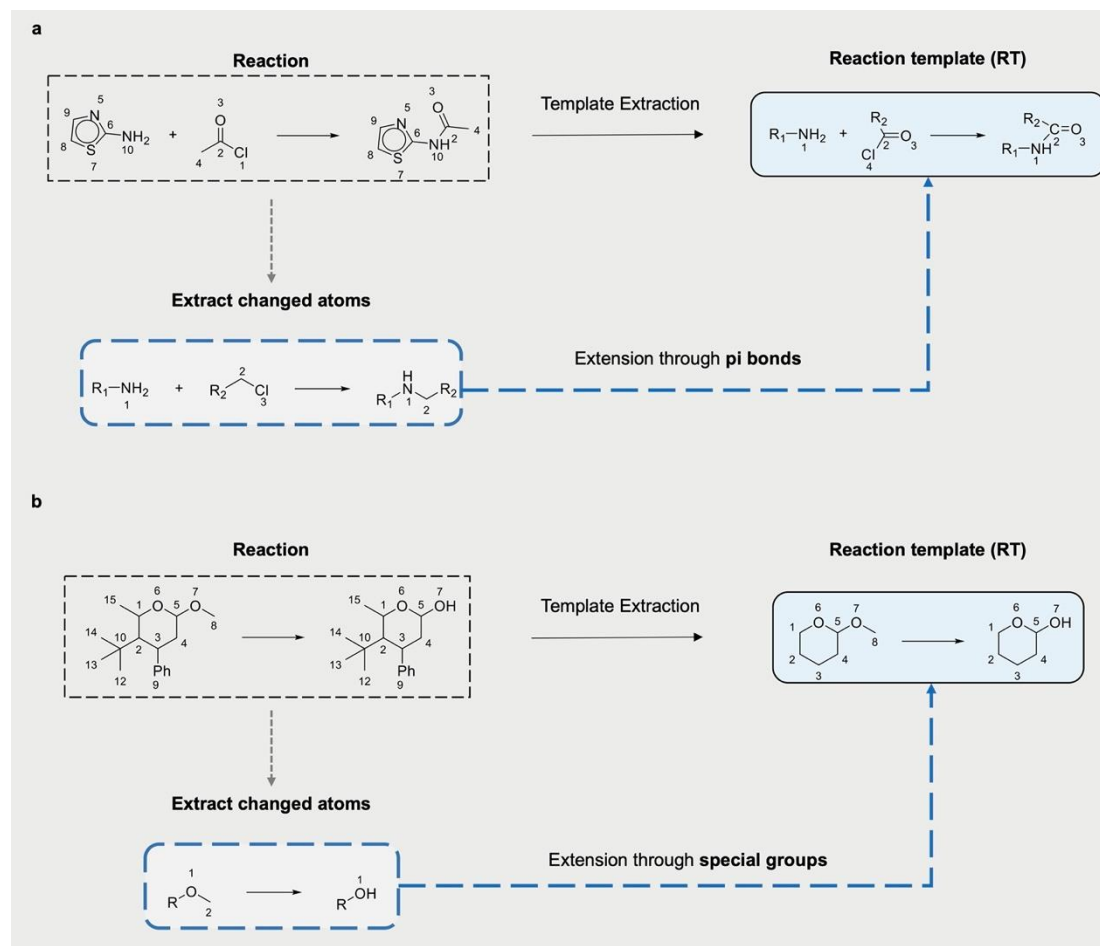

Figure S1. Examples to illustrate the process of obtaining RT. As mentioned in the main text, we extend the original templates comprising changed atoms for mechanism derivation purposes to capture the surrounding environment. Extensions are done through either pi bonds or special groups. (a) Originally, we extract the changed atoms. Since the changed carbon atom is connected to an oxygen through double bond, we include it in the final RT. (b) Changed oxygen atom is one of the special groups we have defined, so whole group THP group is included in the final RT.



## S2. List of special groups used in RT extension

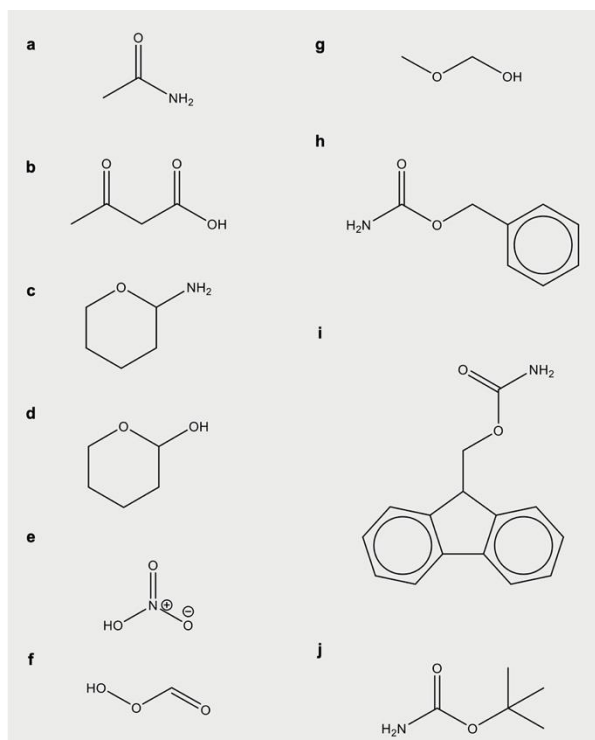

Figure S2. List of special groups used in the extension of originally extracted template to RT. If any changed atom is detected to be part of one of these groups, whole group is included in the RT with respective template atom-map numbers.

### S3. RT-MT many-to-one correspondence

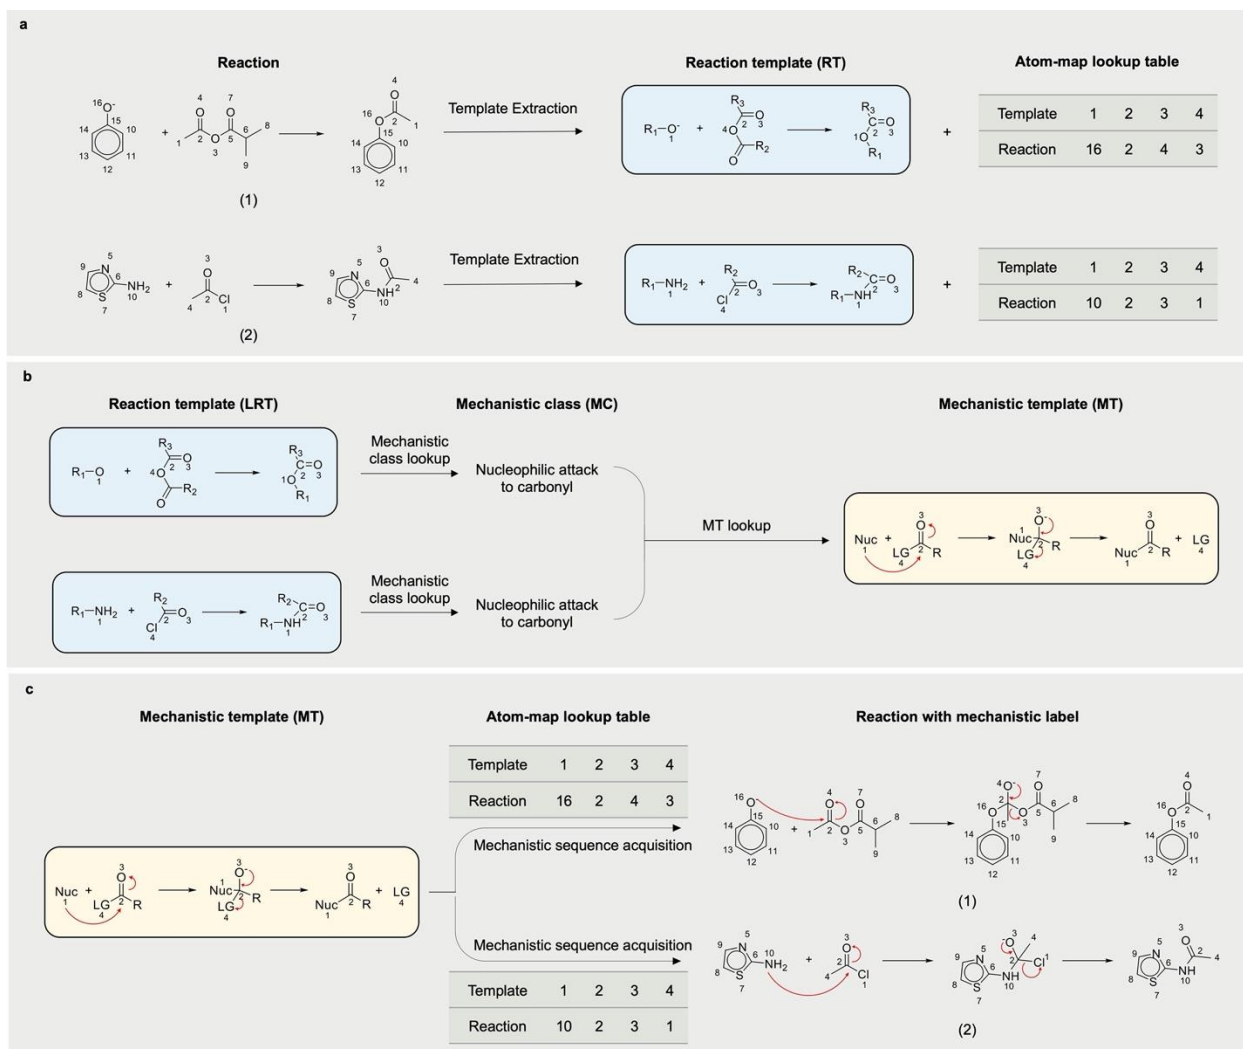

Figure S3. The framework of mechanistic label acquisition. (a) Pair of reactions that follow the same mechanistic pathway is shown as an example to demonstrate the many-to-one correspondence between RTs and an MT. (b) Determination of an MT for extracted RTs. Even though the extracted RTs for both reactions are distinct, the mechanistic sequence that leads to products is the same. Each mechanistic class and MT are unique and there is a one-to-one match between them. (c) Final step in labeling procedure. We convert the MT which shows electron movement in terms of template map numbers to a mechanistic label of the reaction based on the atom-map lookup table.

## S4. RT-MT one-to-many correspondence

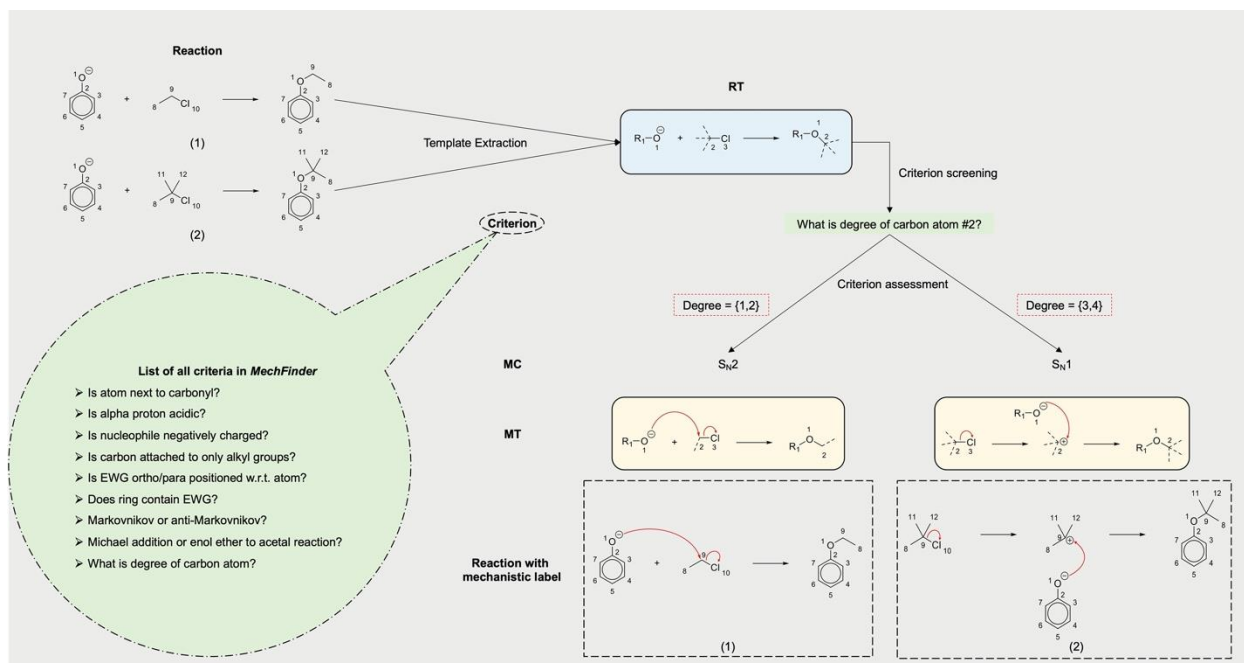

Figure S4. Illustration of one-to-many relationship between extracted RT and labeled MT using two reactions sharing the same RT as examples. For both reactions, RT clearly shows the movement of electrons according to nucleophilic substitution ( $S_N$ ). Nonetheless, the classification into uni- or bi-molecular types within the  $S_N$  class is determined by the degree of electrophilic carbon (atom #2 in the RT) on a high level. Upon extraction of RT, we screen it to assess the applicability of various criteria. Subsequently, we assign the corresponding MT guided by the results of the criterion evaluation. In this case, criterion result {1,2} assign the first reaction into  $S_N2$  MT, whereas the result {3,4} assigns the second reaction into  $S_N1$  MT. These criteria range from examining the presence of certain neighboring functional groups to addressing discreet questions such as whether attached proton is acidic or not. List of all criteria is provided in the green circle. Note that, not all RTs are subject to criterion assessment as the majority of RTs within the labeled dataset exhibit one-to-one correspondence with MTs.

## S5. Mechanism derivation beyond RT

Atoms and bonds that must be included in the mechanism but are not present in the RT are introduced based on specific criteria applied to the original reactant molecules. These atom map numbers are denoted by specific placeholders within the MT and are subsequently replaced during the acquisition of the mechanistic sequence. The framework is illustrated in Fig. S5a.

This distinctive feature empowers our method to capture and elucidate crucial mechanistic nuances, such as delocalizations and tautomerization phenomena, which often play pivotal roles in organic reactions. Two illustrative examples, depicted in Fig. S5b and 5c, showcasing the efficacy of our method. These instances, namely nucleophilic aromatic substitution reactions (4.4% of whole dataset) and aldol condensations (0.9% of the whole dataset) prominently feature the vital participation of additional moieties for a comprehensible mechanistic delineation given the RT focusing on narrower reaction center

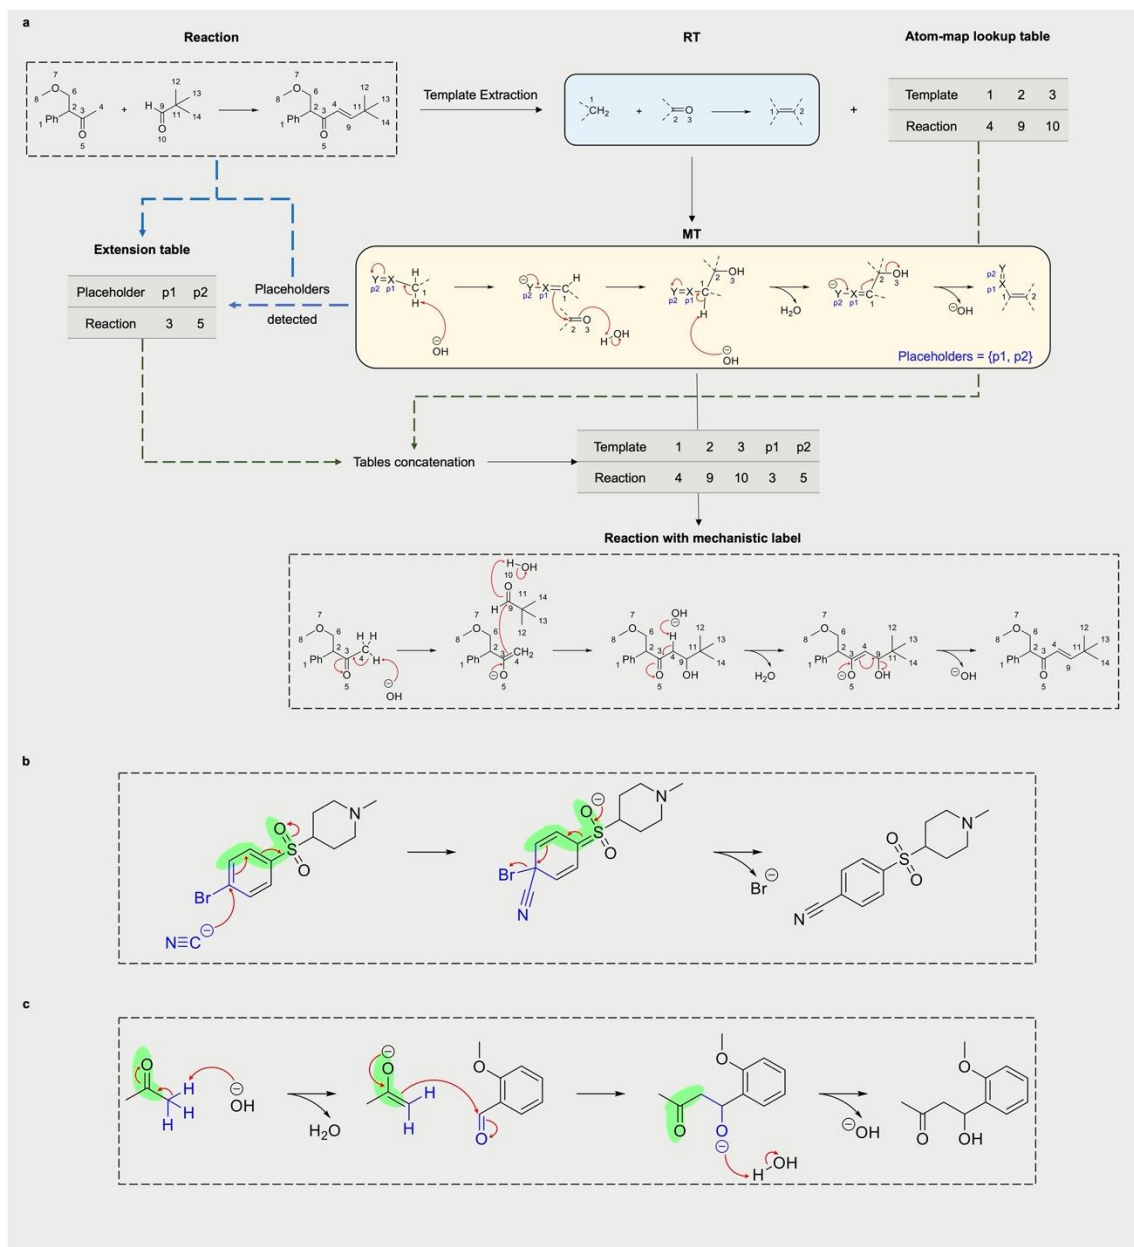

Figure S5. (a) Demonstration of technical manipulation to incorporate functional groups beyond the core atoms in the extracted RT. Once the MT is identified for the reaction, presence of the specific placeholders within the MT is detected which dictates the construction of extension table.

Construction process involves the replacement of these placeholders by the respective atom-map numbers of the atoms present in the original reactant molecule. In this case, upon detection of the presence of p1 and p2, the extension table is built in order to incorporate the respective atom-map numbers in the original reaction. We use original reactant molecules to retrieve corresponding atom-map numbers. The resulting table is then concatenated with the atom-map lookup table generated during RT extraction. This provides complete template map number – reaction map number pairings facilitating the acquisition of mechanistic label for given reaction. (b) Nucleophilic aromatic substitution with cyanide as a nucleophile, bromide as a leaving group and para-positioned sulfonyl group on the benzene ring. The extracted RT for this reaction comprises the nucleophile, leaving group and immediate electrophilic center only (shown in blue). However, the underlying addition-elimination mechanism necessitates electron flow from the ring into the anion-stabilizing sulfonyl group (highlighted in green). Our method captures this pivotal mechanistic element, incorporating it into the resultant label without being constrained by RT limitations. The derived pathway comprehensively includes all requisite atoms and bonds. b) Base-catalyzed aldol condensation. The extracted RT covers the nucleophilic carbon and carbonyl group subject to attack (shown in blue). Nevertheless, the nucleophilicity of the carbon is influenced by the adjacent carbonyl group and should be present in the obtained pathway. The preservation of the enolate intermediate formation is manifested in the mechanism (highlighted in green), notwithstanding the absence of these atoms and bonds in the RT.

## S6. Top 100 RTs

Table S1. List of all RTs in SMARTS format along with the number of reactions belonging to each RT.

| Reaction Template                                                                                  | Number of reactions |
|----------------------------------------------------------------------------------------------------|---------------------|
| [N:1].[O:4]-[C:2]=[O:3]>>[N:1]-[C:2]=[O:3]                                                         | 5505                |
| [N:1].[C:2]-[X:3]>>[N:1]-[C:2]                                                                     | 2331                |
| [N:1].[X:4]-[C:2]=[O:3]>>[N:1]-[C:2]=[O:3]                                                         | 2286                |
| [O:1].[C:2]-[X:3]>>[O:1]-[C:2]                                                                     | 2124                |
| [C:2]-[C:3](-[C:4])(-[C:5])-[O:6]-[C:7](-[N:1])=[O:8]>>[N:1]                                       | 1881                |
| [N:1].[C:2]=[O:3]>>[N:1]-[C:2]                                                                     | 1661                |
| [C:1]-[X:5].[a:3].[n:2]:[a:4]>>[C:1]-[n:2](:[a:3]):[a:4]                                           | 1078                |
| [N:1].[O:3]=[S:2](=[O:4])-[X:5]>>[N:1]-[S:2](=[O:3])=[O:4]                                         | 1027                |
| [N:1].[X:5]-[c:2](:[a:3]):[a:4]>>[N:1]-[c:2](:[a:3]):[a:4]                                         | 1022                |
| [C:1]=[O:2]>>[C:1]-[O:2]                                                                           | 657                 |
| [C:1]-[O:2]>>[C:1]=[O:2]                                                                           | 550                 |
| [N:1].[C:2]=[O:3]>>[N:1]=[C:2]                                                                     | 522                 |
| [C:2]-[O:1]>>[O:1]                                                                                 | 510                 |
| [O:1].[C:2]-[O:3]>>[O:1]-[C:2]                                                                     | 461                 |
| [O:1].[X:5]-[c:2](:[a:3]):[a:4]>>[O:1]-[c:2](:[a:3]):[a:4]                                         | 412                 |
| [N:4].C-C(-C)(-C)-[O:6]-[C:7](=O)-[O:8]-[C:3](=[O:5])-[O:2]-[C:1]>>[C:1]-[O:2]-[C:3](-[N:4])=[O:5] | 401                 |
| [O:1].[X:4]-[C:2]=[O:3]>>[O:1]-[C:2]=[O:3]                                                         | 380                 |
| [N:1].C-C-[O:4]-[C:2]=[O:3]>>[N:1]-[C:2]=[O:3]                                                     | 373                 |
| [N:1].[N:3]=[C:2]=[O:4]>>[N:1]-[C:2](-[N:3])=[O:4]                                                 | 342                 |
| [N:1].C-[O:4]-[C:2]=[O:3]>>[N:1]-[C:2]=[O:3]                                                       | 342                 |
| [O:1].[O:4]-[C:2]=[O:3]>>[O:1]-[C:2]=[O:3]                                                         | 320                 |
| [C:1].[C:2]=[O:3]>>[C:1]=[C:2]                                                                     | 319                 |
| C-[O:3]-[C:1]=[O:2]>>[C:1]-[O:2]                                                                   | 285                 |
| [S:1].[C:2]-[X:3]>>[S:1]-[C:2]                                                                     | 267                 |
| [N:1]-[C:2](=[O:3])-[O:4]-[C:5]-[a:6]1:[a:7]:[a:8]:[a:9]:[a:10]:[a:11]:1>>[N:1]                    | 262                 |
| C-C-[O:3]-[C:1]=[O:2]>>[C:1]-[O:2]                                                                 | 241                 |
| [O:1].[O:3]=[S:2](=[O:4])-[X:5]>>[O:1]-[S:2](=[O:3])=[O:4]                                         | 240                 |
| [C:1]#[N:2]>>[C:1]-[N:2]                                                                           | 225                 |
| [N:1].C-C(=O)-[O:4]-[C:2]=[O:3]>>[N:1]-[C:2]=[O:3]                                                 | 214                 |
| C-C(-C)(-C)-[Si:2](-C)(-C)-[O:1]>>[O:1]                                                            | 198                 |
| C-[C:2](-[O:1])=[O:3]>>[O:1]                                                                       | 195                 |
| [N:1].[C:2]-[O:3]>>[N:1]-[C:2]                                                                     | 188                 |
| [C:1]=[O:3].[C:2]-[P:4](-c1:c:c:c:c:1)(-c1:c:c:c:c:1)-c1:c:c:c:c:1>>[C:1]=[C:2]                    | 176                 |
| [N:3].[N:1]=[C:2]=[O:4]>>[N:1]-[C:2](-[N:3])=[O:4]                                                 | 173                 |
| [N:1]=[N:2]=[N:3]>>[N:1]                                                                           | 165                 |
| [C:1]-[C:2](-[N:3])=[O:4]>>[C:1]-[C:2]-[N:3]                                                       | 159                 |

|                                                                                                                               |     |
|-------------------------------------------------------------------------------------------------------------------------------|-----|
| [C:1]-[Mg:4].[C:2]=[O:3]>>[C:1]-[C:2]-[O:3]                                                                                   | 153 |
| [C:2]-[C:3](-[N:1])=[O:4]>>[N:1]                                                                                              | 144 |
| [O:2]=[C:3]1-[N:1]-[C:4](=[O:5])-[a:6]2:c:c:c:[a:7]:2-1>>[N:1]                                                                | 140 |
| [N:1].C-S(=O)(=O)-[O:3]-[C:2]>>[N:1]-[C:2]                                                                                    | 139 |
| [S:1].Cl-c1:c:c:c(-[C:3](=[O:4])-[O:5]-[O:2]):c:1>>[S:1]=[O:2]                                                                | 127 |
| [X:6]-[C:2]=[O:1].[a:4]:[c:3]:[a:5]>>[O:1]=[C:2]-[c:3](:[a:4]):[a:5]                                                          | 121 |
| [N:1].[N:3]=[C:2]=[S:4]>>[N:1]-[C:2](-[N:3])=[S:4]                                                                            | 116 |
| [O:3].[O:1]=[S:2](=[O:4])-[X:5]>>[O:1]=[S:2](-[O:3])=[O:4]                                                                    | 113 |
| [C:1]=[O:3].C-C-O-[P:4](-[C:2])(=[O:5])-[O-C-C]>>[C:1]=[C:2]                                                                  | 111 |
| [O:1].[C:2]=[C:3]>>[O:1]-[C:2]-[C:3]                                                                                          | 104 |
| [O:4].[O:1]=[S:2](=[O:3])-[X:5]>>[O:1]=[S:2](=[O:3])-[O:4]                                                                    | 98  |
| [N:1].[N:3].[O:4]-[C:2]=[O:5]>>[n:1]:[c:2]:[n:3]                                                                              | 92  |
| [N:1].F-C(F)(F)-C(=O)-[O:4]-[C:2]=[O:3]>>[N:1]-[C:2]=[O:3]                                                                    | 91  |
| [a:4]:[c:3]:[a:5].C-[N:6](-C)-[C:2]=[O:1]>>[O:1]=[C:2]-[c:3](:[a:4]):[a:5]                                                    | 87  |
| [S:1].[X:5]-[c:2](:[a:3]):[a:4]>>[S:1]-[c:2](:[a:3]):[a:4]                                                                    | 87  |
| [C:1]=[O:2]>>[C:1]                                                                                                            | 86  |
| [C:1]-[X:4].[N:2]=[N:3]>>[C:1]-[N:2]=[N:3]                                                                                    | 85  |
| [N:2]-[C:1]=[S:5].[X:6]-[C:4]-[C:3]=[O:7]>>[c:1]1:[n:2]:[c:3]:[c:4]:[s:5]:1                                                   | 72  |
| F-[C:2](-F)(-F)-[C:3](-[N:1])=[O:4]>>[N:1]                                                                                    | 71  |
| [C:1]-[O:3].Br-[C:4](-Br)(-Br)-[Br:2]>>[C:1]-[Br:2]                                                                           | 70  |
| [O:1].C-S(=O)(=O)-[O:3]-[C:2]>>[O:1]-[C:2]                                                                                    | 66  |
| [a:5]:[n:4]:[a:6].[O:1]=[S:2](=[O:3])-[X:7]>>[O:1]=[S:2](=[O:3])-[n:4](:[a:5]):[a:6]                                          | 65  |
| [O:3].[N:1]=[C:2]=[O:4]>>[N:1]-[C:2](-[O:3])=[O:4]                                                                            | 61  |
| [X:6]-[C:2]=[O:1].[a:4]:[n:3]:[a:5]>>[O:1]=[C:2]-[n:3](:[a:4]):[a:5]                                                          | 58  |
| [N:3]-[C:2](=[O:4])-[a:1]>>[a:1]-[C:2]#[N:3]                                                                                  | 56  |
| [a:3]:[n:2]:[a:4].Cl-c1:c:c:c(-[C:5](=[O:6])-[O:7]-[O:1]):c:1>>[O:1]-[n:2](:[a:3]):[a:4]                                      | 55  |
| [a:3]:[n:2]:[a:4].C-S(=O)(=O)-[O:5]-[C:1]>>[C:1]-[n:2](:[a:3]):[a:4]                                                          | 55  |
| [O:1].[O:3].[C:2]=[O:4]>>[O:1]-[C:2]-[O:3]                                                                                    | 55  |
| [N:1].C-C(-C)(-C)-[O:4]-[C:2]=[O:3]>>[N:1]-[C:2]=[O:3]                                                                        | 53  |
| [a:6]:[n:5]:[a:7].C-C(-C)(-C)-[O:8]-[C:9](=O)-[O:10]-[C:3](=[O:4])-[O:2]-[C:1]>>[C:1]-[O:2]-[C:3](=[O:4])-[n:5](:[a:6]):[a:7] | 53  |
| [N:3].[N:1]=[C:2]=[S:4]>>[N:1]-[C:2](-[N:3])=[S:4]                                                                            | 52  |
| [N:1]-[C:2]=[S:3].[X:6]-[C:4]-[C:5]=[O:7]>>[n:1]1:[c:2]:[s:3]:[c:4]:[c:5]:1                                                   | 50  |
| [N:1]-[C:2](=[O:4])-[a:3]>>[N:1]-[C:2]-[a:3]                                                                                  | 48  |
| [C:1]=[N:2]>>[C:1]-[N:2]                                                                                                      | 46  |
| [C:1]=[O:3].[C:2]=[P:4](-c1:c:c:c:e:1)(-c1:c:c:c:e:1)-c1:c:c:c:e:1>>[C:1]=[C:2]                                               | 45  |
| [a:5]:[n:4]:[a:6].[X:7]-[c:2](:[a:1]):[a:3]>>[a:1]:[c:2](:[a:3])-[n:4](:[a:5]):[a:6]                                          | 45  |
| [N:1]-[N:2].[O:6]=[C:3]-[C:4]-[C:5]=[O:7]>>[n:1]1:[n:2]:[c:3]:[c:4]:[c:5]:1                                                   | 43  |
| [C:1]-[X:4].[C:2]#[N:3]>>[C:1]-[C:2]#[N:3]                                                                                    | 43  |
| [S:1].[O:2]-[O:3]>>[S:1]=[O:2]                                                                                                | 42  |
| [N:1].[O:6]=[C:2]-[C:3]-[C:4]-[C:5]=[O:7]>>[n:1]1:[c:2]:[c:3]:[c:4]:[c:5]:1                                                   | 40  |

|                                                                                                                                        |    |
|----------------------------------------------------------------------------------------------------------------------------------------|----|
| [C:2]-[O:3]-[C:4]-[O:1]>>[O:1]                                                                                                         | 40 |
| [C:1]-[C:2](-[N:3])=[O:4]>>[C:1]-[C:2]#[N:3]                                                                                           | 39 |
| [N:1],[C:2]=[O:6],[a:4]:[c:3]:[a:5]>>[N:1]-[C:2]-[c:3](:[a:4]):[a:5]                                                                   | 39 |
| [C:1]=[C:2].Cl-c1:c:c:c(-[C:4])(=[O:5])-[O:6]-[O:3]:c:1>>[C:1]1-[C:2]-[O:3]-1                                                          | 37 |
| [N:2]=[N:3].C-S(=O)(=O)-[O:4]-[C:1]>>[C:1]-[N:2]=[N:3]                                                                                 | 37 |
| [C:4]-[C:5](-[C:6])(-[C:7])-[O:8]-[C:9](=[O:10])-[n:2](:[a:1]):[a:3]>>[a:1]:[n:2]:[a:3]                                                | 37 |
| [C:2]=[O:1].[Mg:6]-[c:3](:[a:4]):[a:5]>>[O:1]-[C:2]-[c:3](:[a:4]):[a:5]                                                                | 36 |
| [N:2],[C:1]-[X:4],[C:3]-[X:5]>>[C:1]-[N:2]-[C:3]                                                                                       | 36 |
| [N:3]-[C:2]=[S:1],[X:6]-[C:5]-[C:4]=[O:7]>>[s:1]1:[c:2]:[n:3]:[c:4]:[c:5]:1                                                            | 36 |
| [O:1]-[C:2]1-[C:3]-[C:4]-[C:5]-[C:6]-[O:7]-1>>[O:1]                                                                                    | 34 |
| [a:1]:[n:2]:[a:3],[X:7]-[c:4](:[a:5]):[a:6]>>[a:1]:[n:2](:[a:3])-[c:4](:[a:5]):[a:6]                                                   | 33 |
| [C:1],[C:2]=[O:3]>>[C:1]-[C:2]-[O:3]                                                                                                   | 31 |
| [C:1]-[X:10],[C:7]-[C:6](-[C:8])(-[C:9])-[O:5]-[C:3](-[N:2])=[O:4]>>[C:1]-[N:2]-[C:3](=[O:4])-[O:5]-[C:6](-[C:7])(-[C:8])-[C:9]        | 29 |
| [a:1]:[n:2](:[a:3])-[C:4]1-[C:5]-[C:6]-[C:7]-[C:8]-[O:9]-1>>[a:1]:[n:2]:[a:3]                                                          | 29 |
| [N:1]-[C:2](=[O:3])-[O:4]-[C:5]-[C:6]1-[a:7]2:[a:8]:[a:9]:[a:10]:[a:11]:[a:12]:2-[a:13]2:[a:14]:[a:15]:[a:16]:[a:17]:[a:18]:2-1>>[N:1] | 28 |
| [C:1]-[O:2]-[C:3]1-[C:4]-[C:5]-[C:6]-[C:7]-[O:8]-1>>[C:1]-[O:2]                                                                        | 28 |
| [C:1]-[O:5],[a:3]:[n:2]:[a:4]>>[C:1]-[n:2](:[a:3]):[a:4]                                                                               | 27 |
| [C:1]-[Mg:5].C-O-[N:6](-C)-[C:2](=[O:3])-[a:4]>>[C:1]-[C:2](=[O:3])-[a:4]                                                              | 27 |
| [C:2]=[O:1],[C:3]#[C:4]>>[O:1]-[C:2]-[C:3]#[C:4]                                                                                       | 27 |
| [N:1]-[C:2](=[O:3])-[a:4]1:c:c:c:c:1>>[N:1]                                                                                            | 25 |
| [O:1],[C:2]=[N:3]=[N:4]>>[O:1]-[C:2]                                                                                                   | 25 |
| [N:1],[S:3]=[C:2](-[X:4])-[X:5]>>[N:1]=[C:2]=[S:3]                                                                                     | 24 |
| [N:1].F-C(F)(F)-S(=O)(=O)-[O:5]-[c:2](:[a:3]):[a:4]>>[N:1]-[c:2](:[a:3]):[a:4]                                                         | 21 |
| [C:2]#[N:1],[X:6]-[c:3](:[a:4]):[a:5]>>[N:1]#[C:2]-[c:3](:[a:4]):[a:5]                                                                 | 9  |



## S7. Distribution of mechanistic classes in mech-USPTO-31K dataset

Table S2. Distribution of reactions across mechanistic classes in the labeled dataset.

| Mechanistic Class                                  | Number of reactions | Mechanistic Class                       | Number of reactions |
|----------------------------------------------------|---------------------|-----------------------------------------|---------------------|
| DCC condensation                                   | 5816                | (hemi)acetal (aminal) hydrolysis        | 131                 |
| Nucleophilic attack to (thio)carbonyl              | 4963                | Sulfide oxidation                       | 127                 |
| S <sub>N</sub> 2 reaction                          | 3956                | Friedel Crafts acylation                | 121                 |
| S <sub>N</sub> 2 reaction with alcohol(thiol)      | 2191                | Horner Wadsworth Emmons reaction        | 111                 |
| Boc deprotection                                   | 1918                | Primary amide dehydration               | 95                  |
| Reductive amination                                | 1661                | Imidazole synthesis                     | 92                  |
| Alcohol attack to carbonyl or sulfonyl             | 892                 | Vilsmeier formylation                   | 87                  |
| Nucleophilic attack to iso(thio)cyanate            | 683                 | Wolff Kishner reduction                 | 86                  |
| Carbonyl reduction                                 | 647                 | Appel reaction                          | 70                  |
| S <sub>N</sub> Ar reaction (ortho)                 | 599                 | Acetal formation from enol ether        | 64                  |
| S <sub>N</sub> Ar reaction (para)                  | 548                 | Acetal formation                        | 55                  |
| Ester reduction                                    | 526                 | Amine oxidation                         | 55                  |
| Imine formation                                    | 522                 | Imine reduction                         | 46                  |
| O-demethylation                                    | 510                 | Wittig reaction with ylide              | 45                  |
| Mitsunobu reaction                                 | 488                 | Knorr pyrazole synthesis                | 43                  |
| Swern oxidation                                    | 322                 | Sulfide oxidation by peroxide           | 42                  |
| Aldol condensation                                 | 319                 | Paal Knorr pyrrole synthesis            | 40                  |
| S <sub>N</sub> 1 reaction                          | 305                 | Mannich reaction                        | 39                  |
| S <sub>N</sub> Ar reaction with alcohol (para)     | 300                 | Alkene epoxidation                      | 37                  |
| Cbz deprotection                                   | 262                 | Double S <sub>N</sub> 2 reaction        | 36                  |
| Carboxylic acid derivative hydrolysis or formation | 240                 | Aldol addition                          | 31                  |
| Jones oxidation                                    | 228                 | Fmoc deprotection                       | 28                  |
| Nitrile reduction                                  | 225                 | Alkynyl attack to carbonyl              | 27                  |
| Amide reduction                                    | 207                 | Weinreb ketone synthesis                | 27                  |
| Base catalyzed ester hydrolysis                    | 195                 | Markovnikov addition                    | 26                  |
| Grignard reaction                                  | 189                 | Methyl ester synthesis                  | 25                  |
| S <sub>N</sub> 2 reaction with tosylate            | 182                 | Isothiocyanate synthesis                | 24                  |
| S <sub>N</sub> Ar reaction with alcohol (ortho)    | 182                 | Michael addition                        | 14                  |
| Wittig reaction                                    | 176                 | Lactone reduction                       | 10                  |
| Staudinger reaction                                | 165                 | Intramolecular lactonization            | 9                   |
| Hantzsch thiazole synthesis                        | 158                 | S <sub>N</sub> 1 reaction with tosylate | 6                   |
| Ing Manske                                         | 140                 |                                         |                     |

## S8. Manual evaluation of 100 randomly sampled reactions

We manually evaluated the 100 randomly sampled reactions from mech-USPTO-31k dataset (see below) and compared the results of reaction mechanism generated by *MechFinder* and ELECTRO labeling method. We found *MechFinder* gives 100% reasonable correct mechanism, while only three of the ELECTRO labels are chemically reasonable, which are S<sub>N</sub>2 reactions (reactions 46, 69, and 89).

### Reference

1. Bradshaw, J., Kusner, M. J., Paige, B., Segler, M. H. S. & Hernández-Lobato, J. M. A Generative Model For Electron Paths. *ArXiv180510970 Phys. Stat* (2019).

# Original reaction sampled RXN\_ID:0)

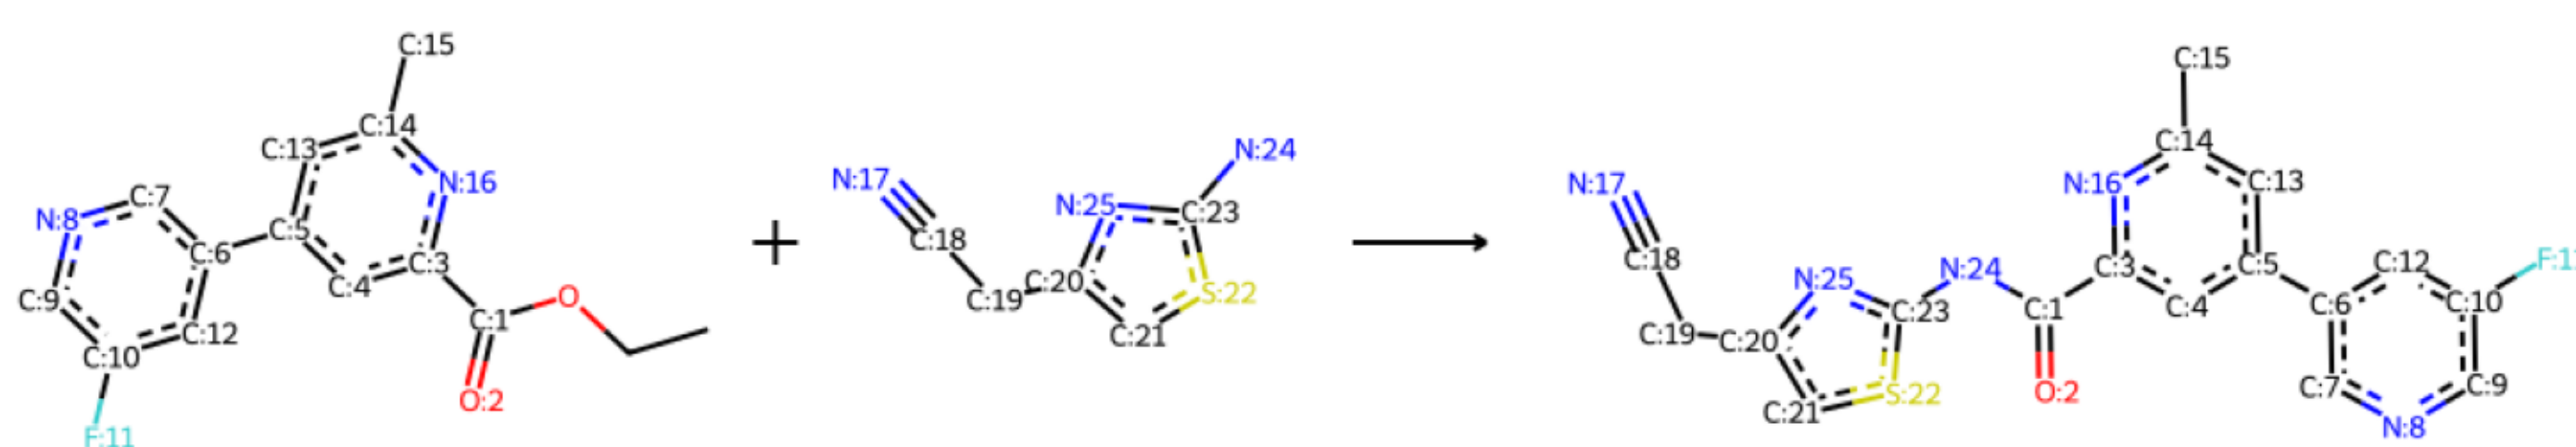

Identified mechanistic class -  
nucleophilic\_attack\_to\_(thio)carbonyl\_or\_sulfonyl reaction

## Reaction with missing reagents recovered

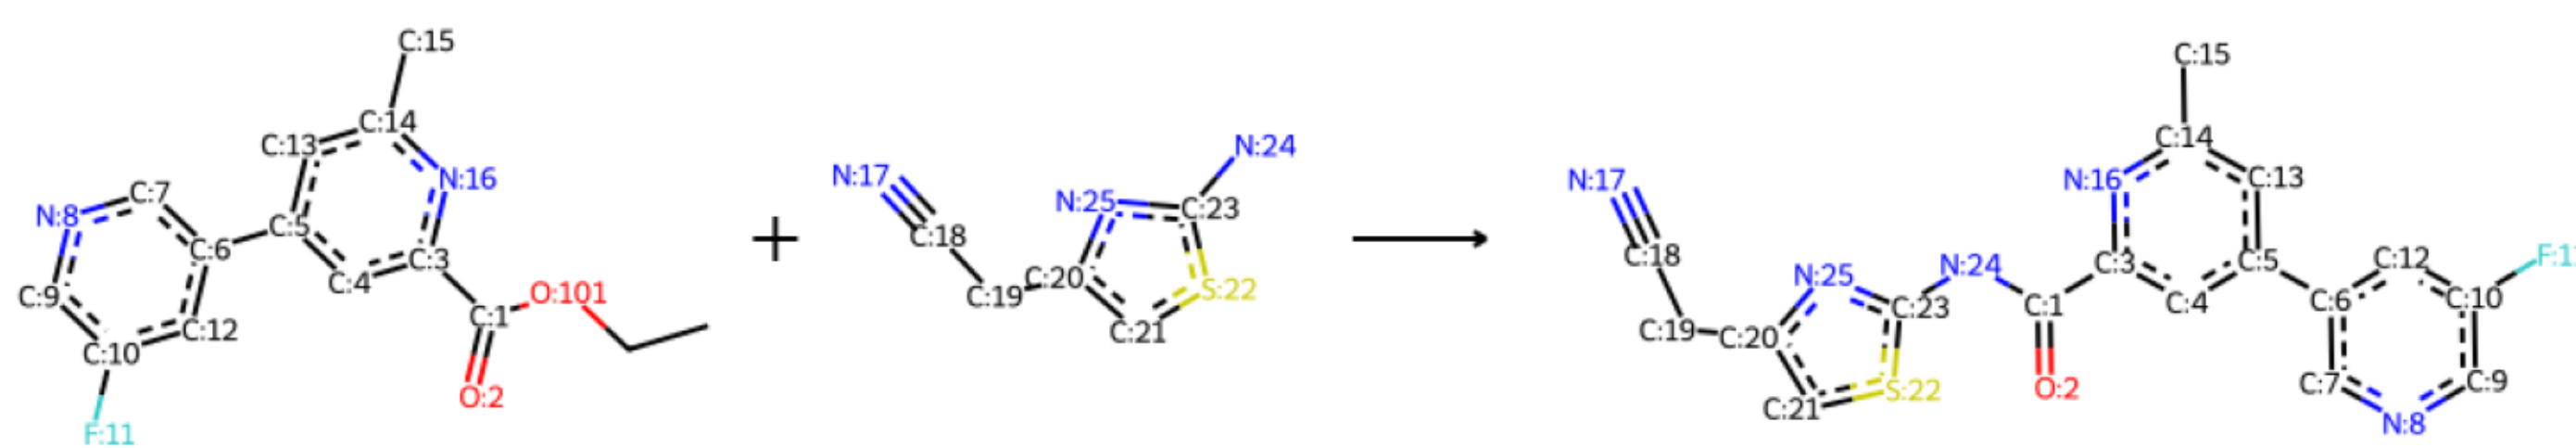

## Proposed mechanistic pathway

[Arrow order: (1) green, (2) blue, (3) red, (4) orange]

step #1

step #2

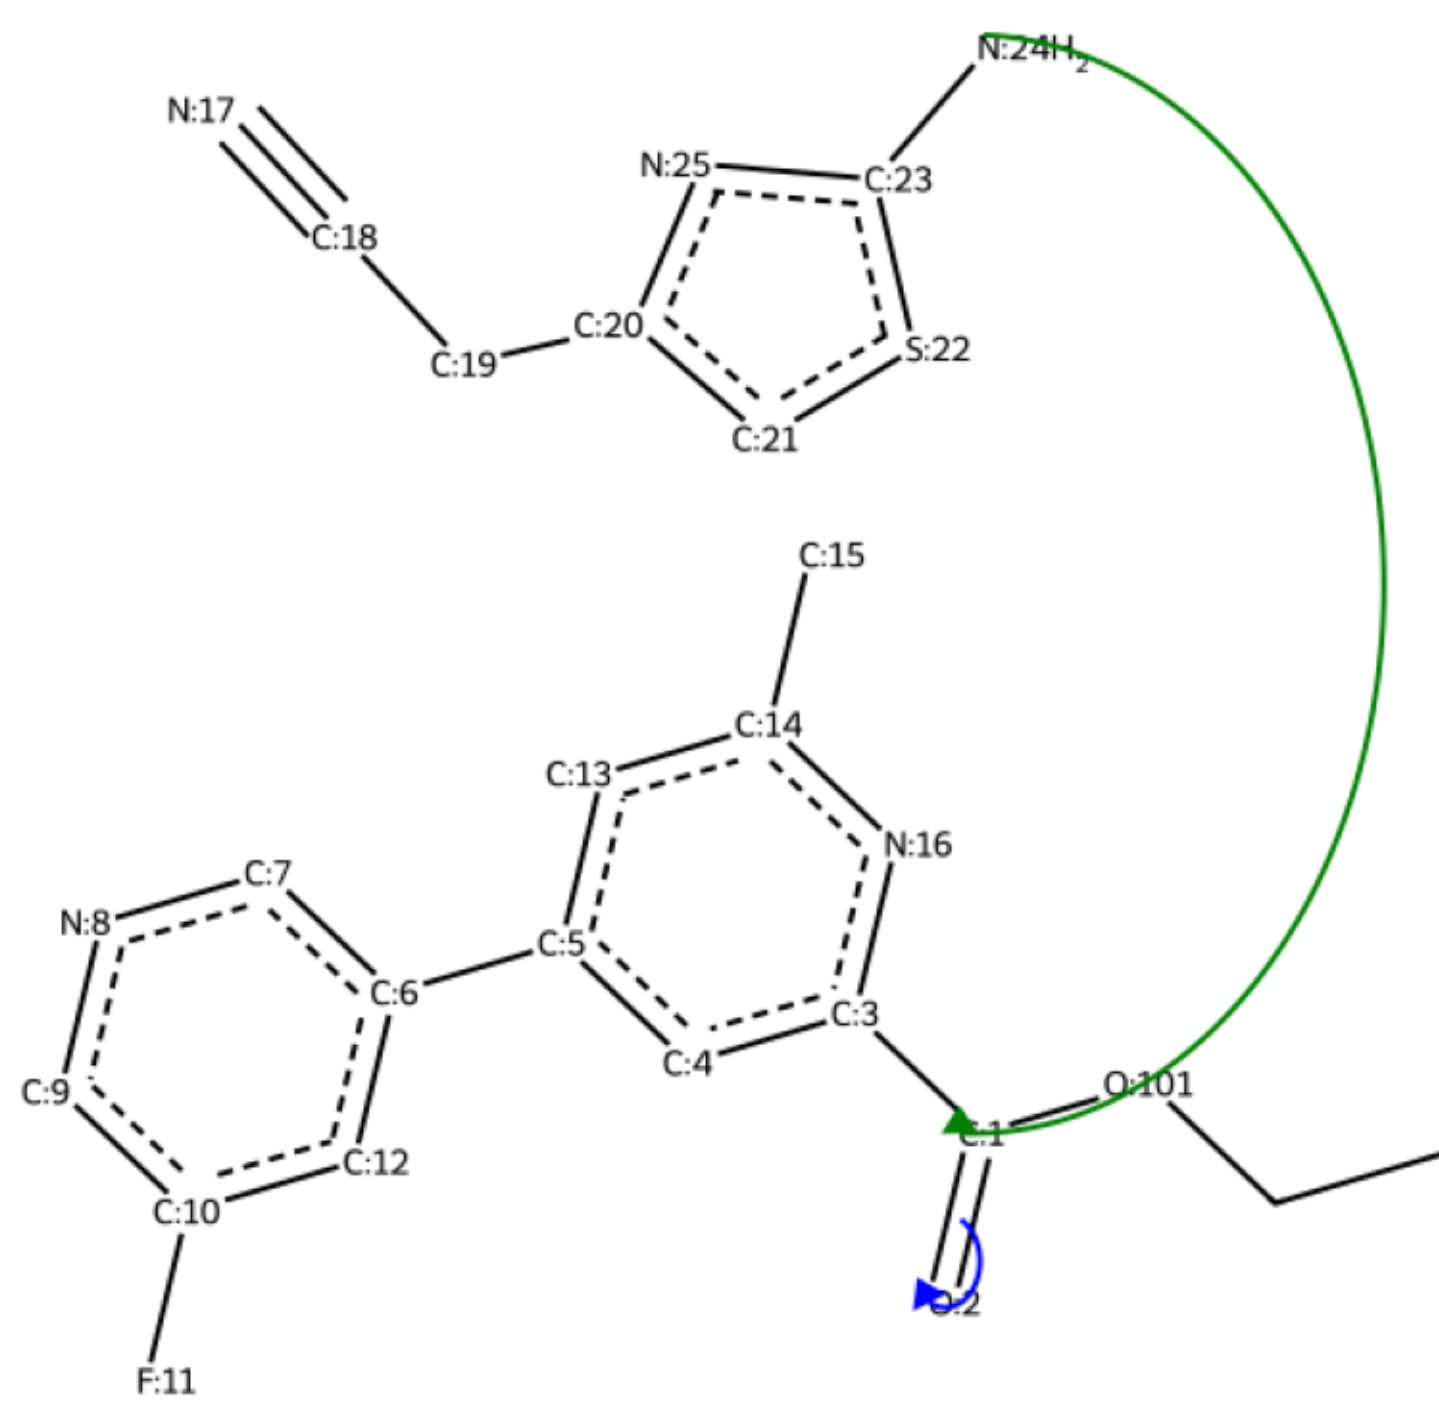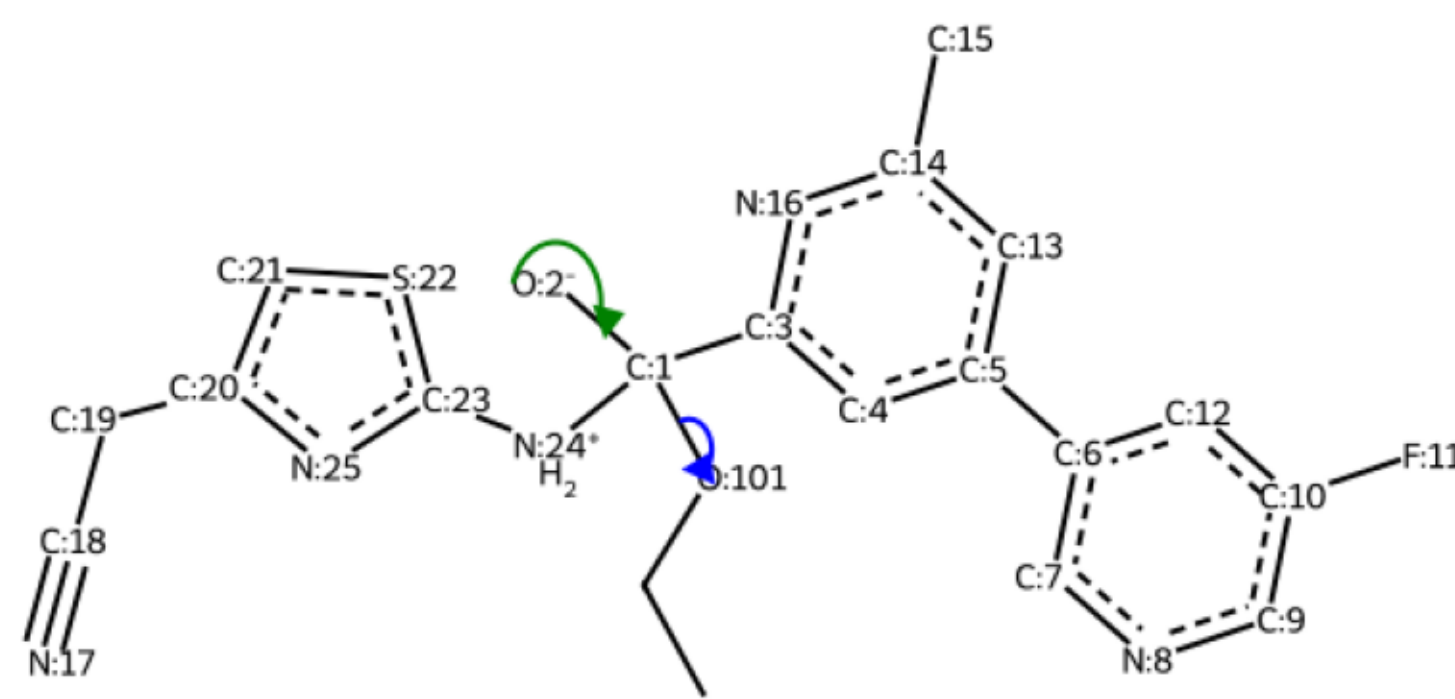

Product(s)

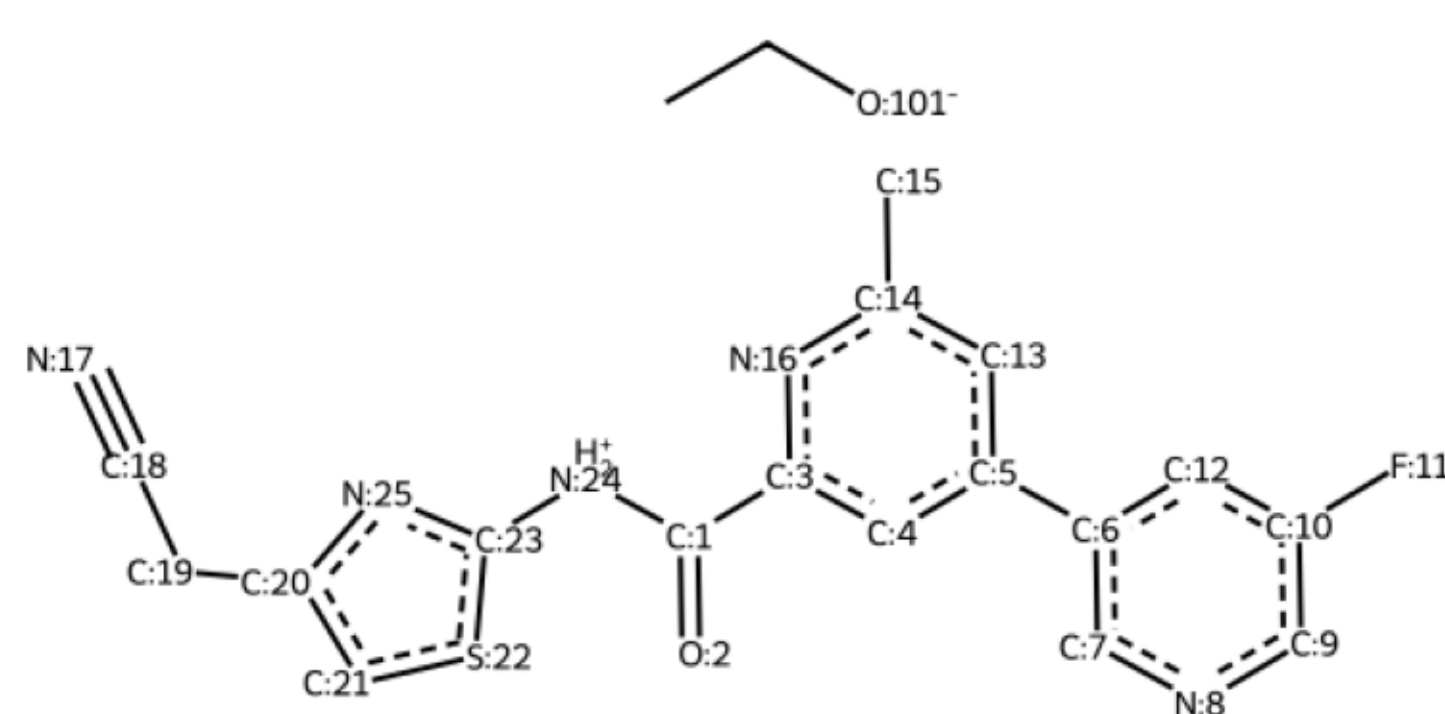

proton transfer

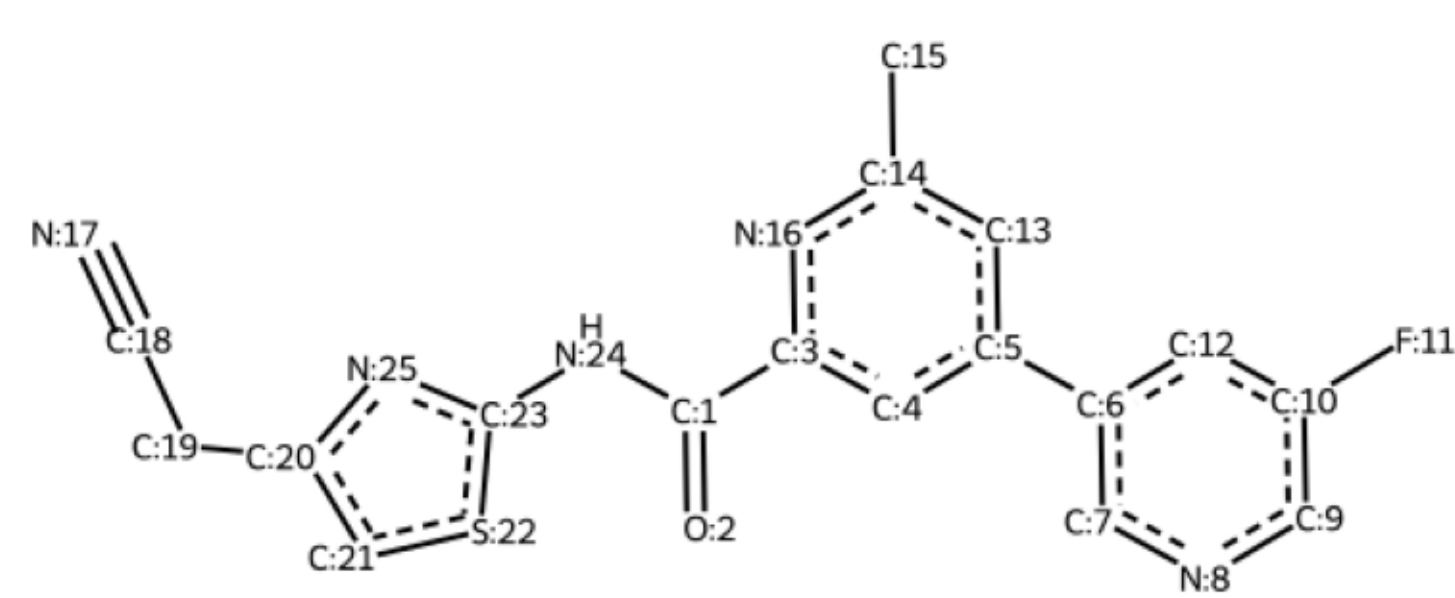



# Original reaction sampled RXN\_ID:1)

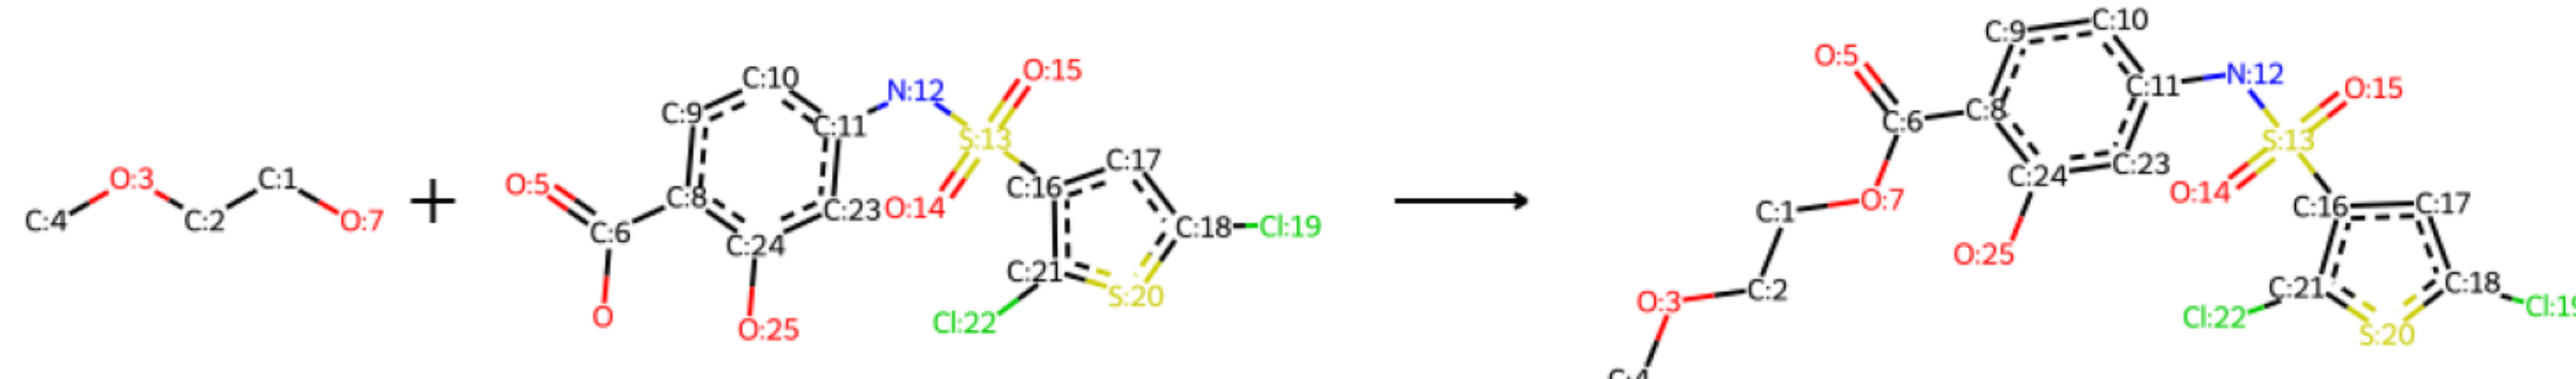

Identified mechanistic class -  
DCC\_condensation reaction

## Reaction with missing reagents recovered

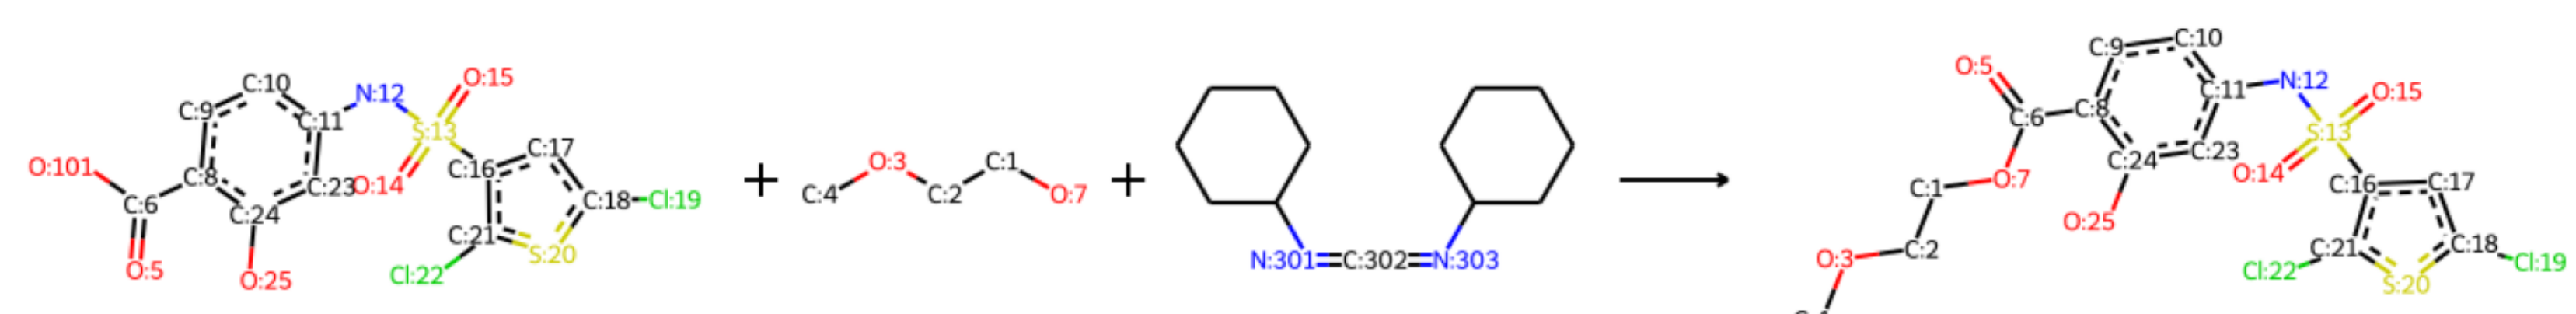

## Proposed mechanistic pathway

[Arrow order: (1) green, (2) blue, (3) red, (4) orange]

step #1

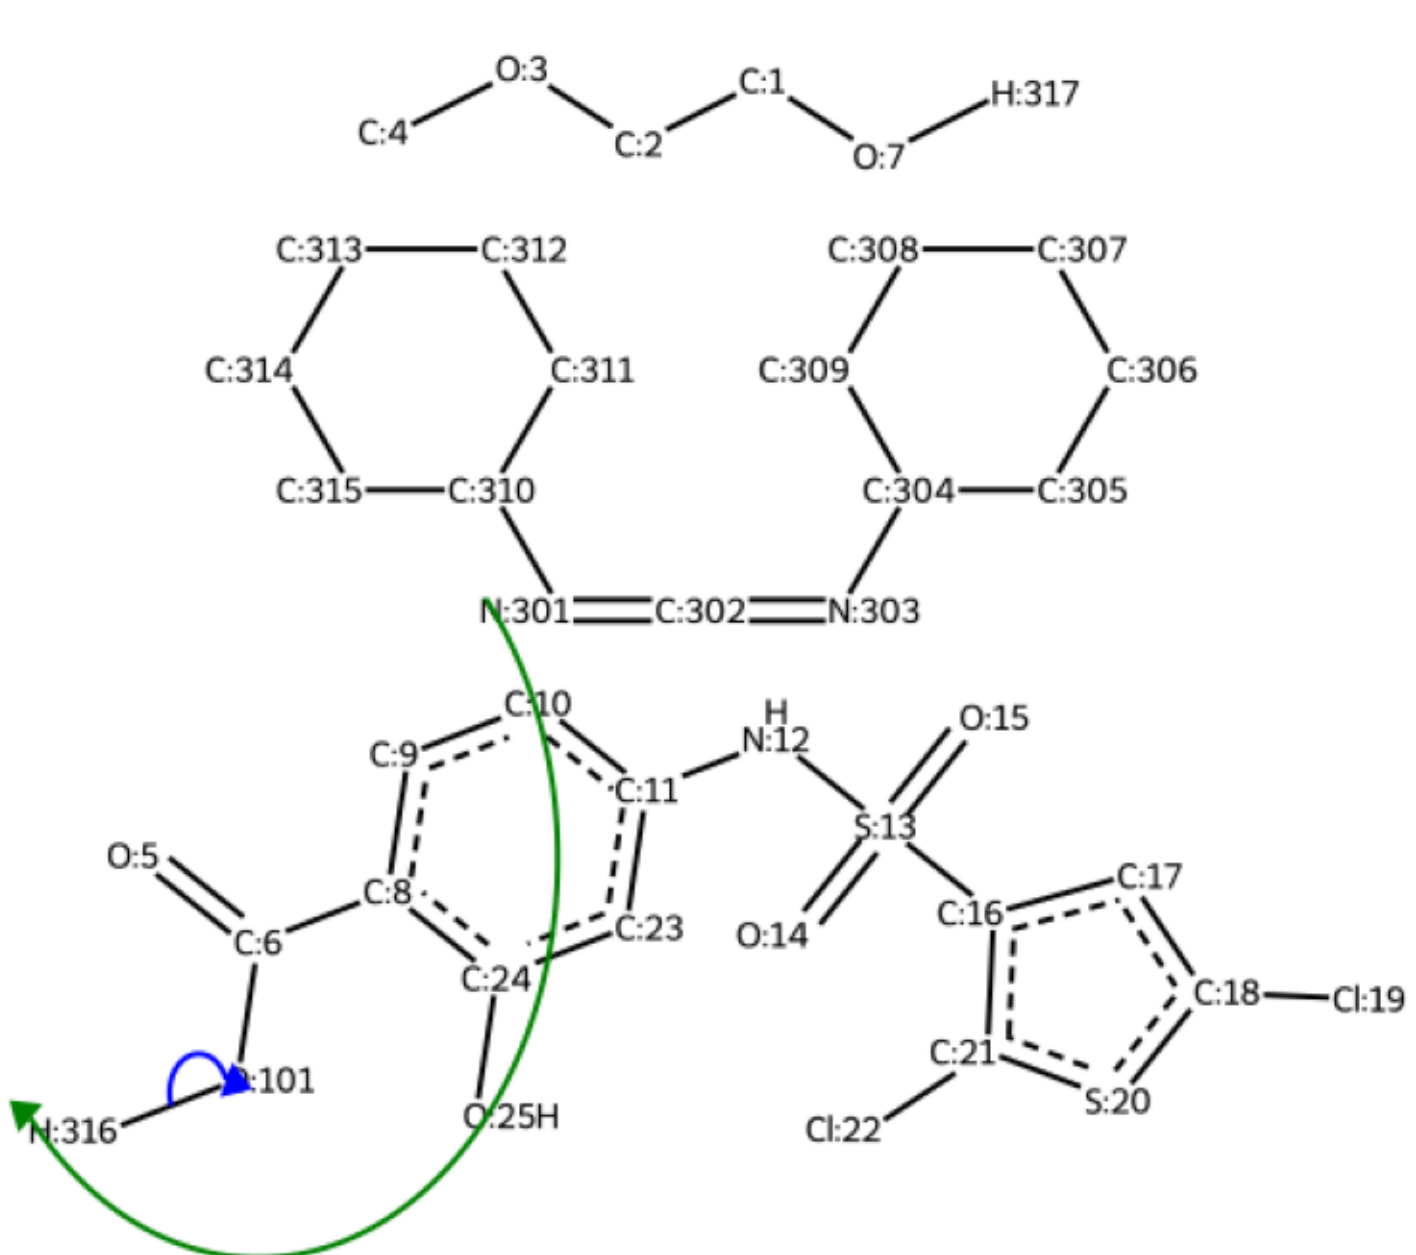

step #2

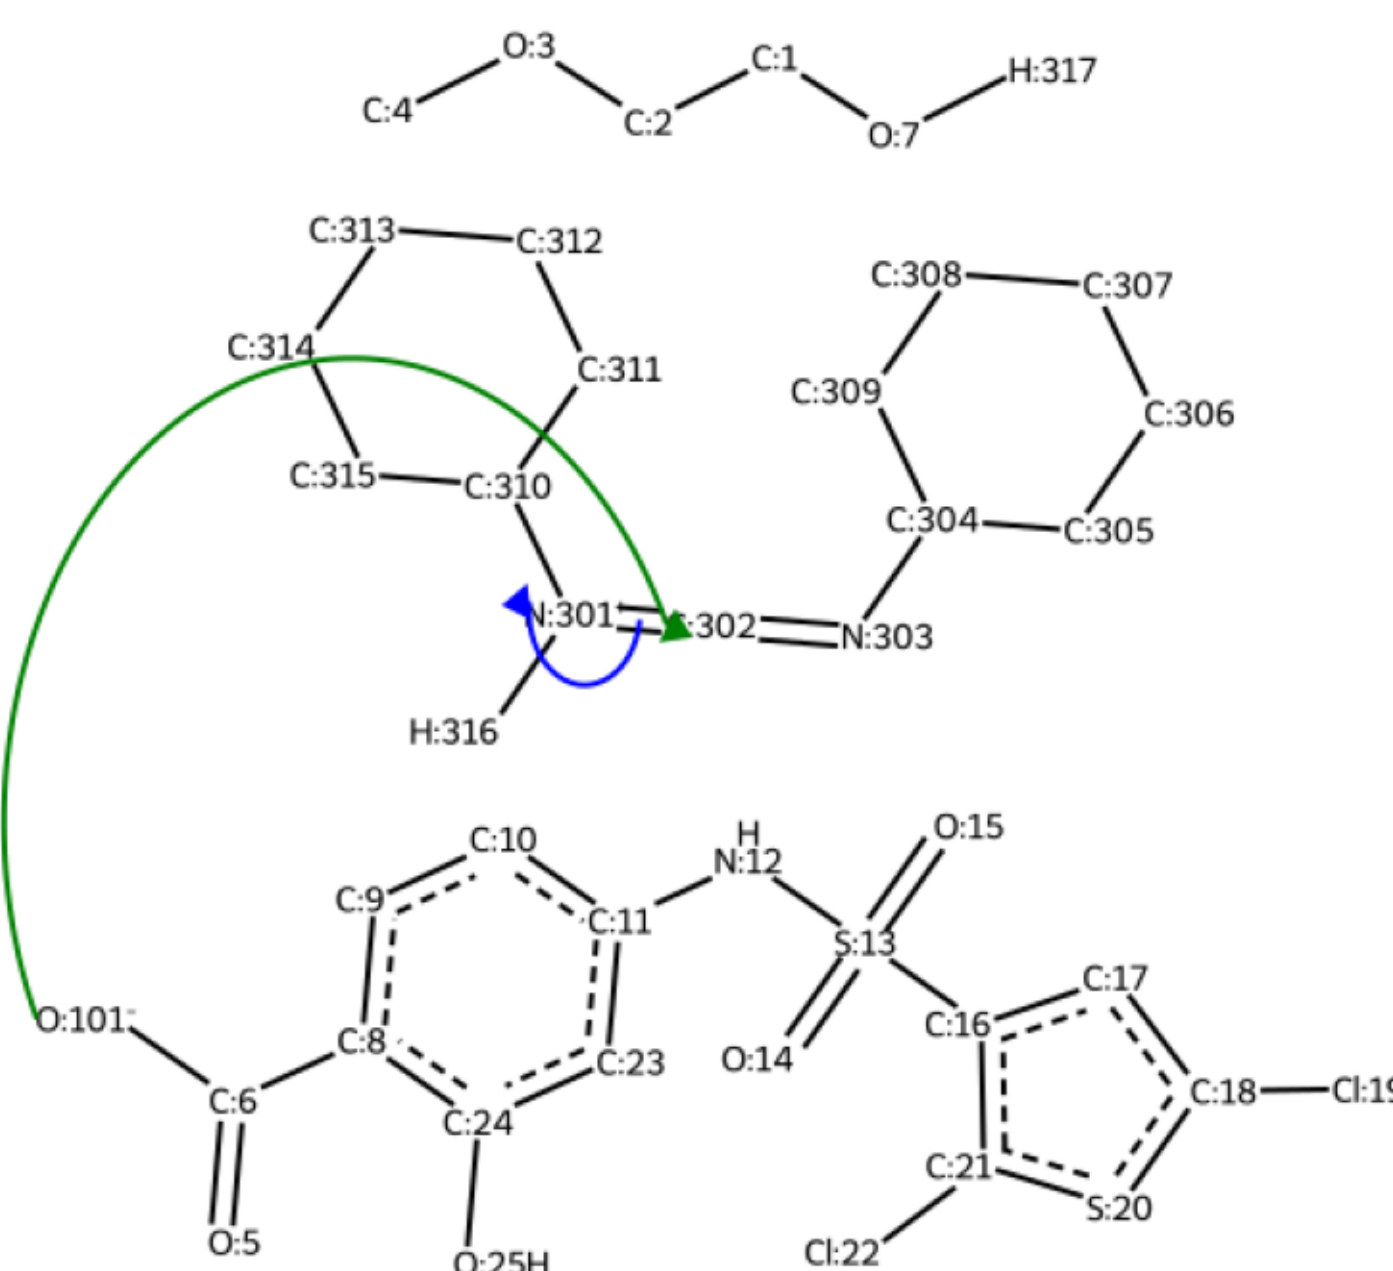

step #3

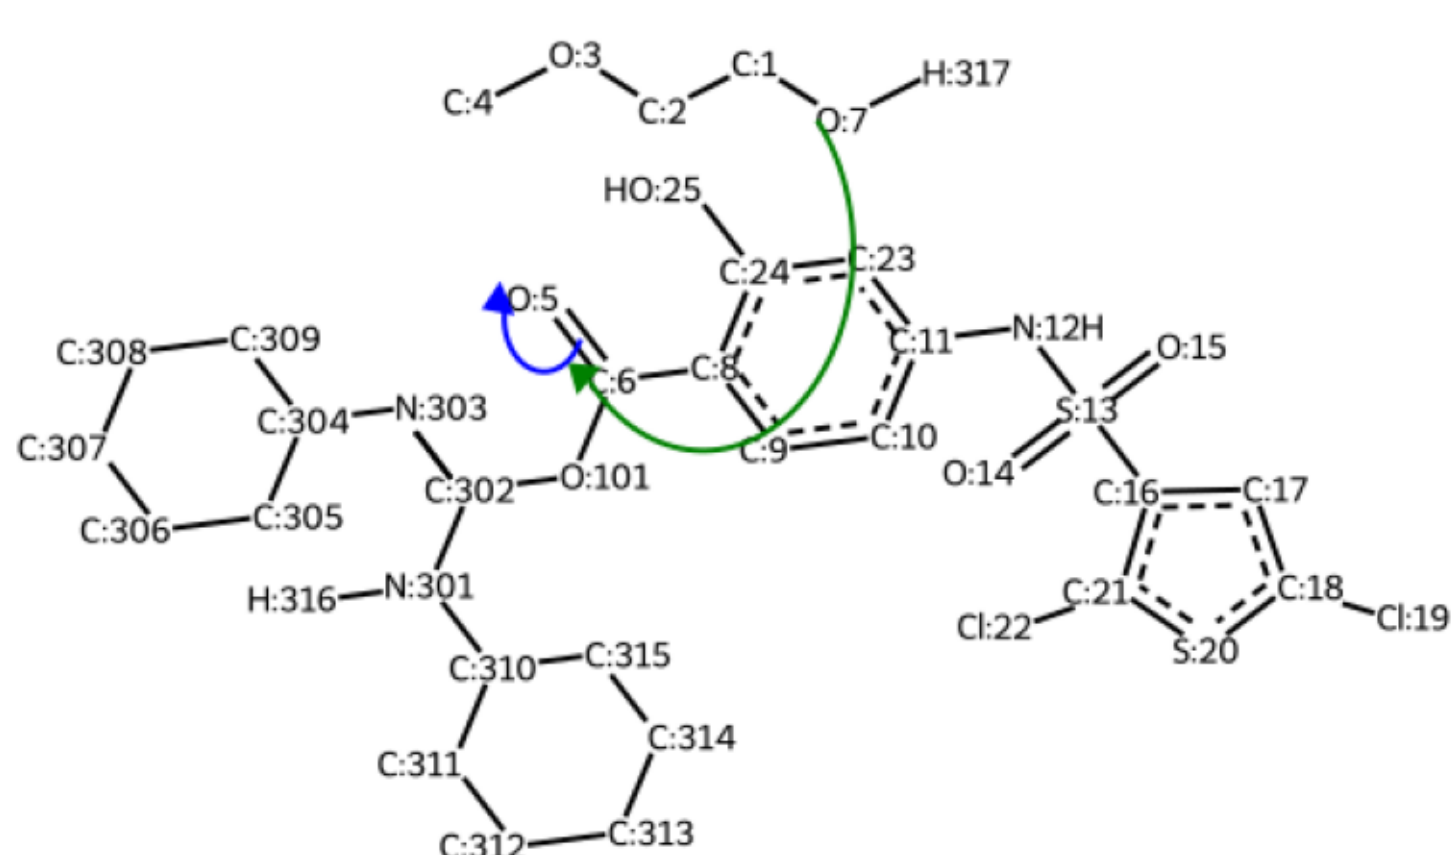

step #4

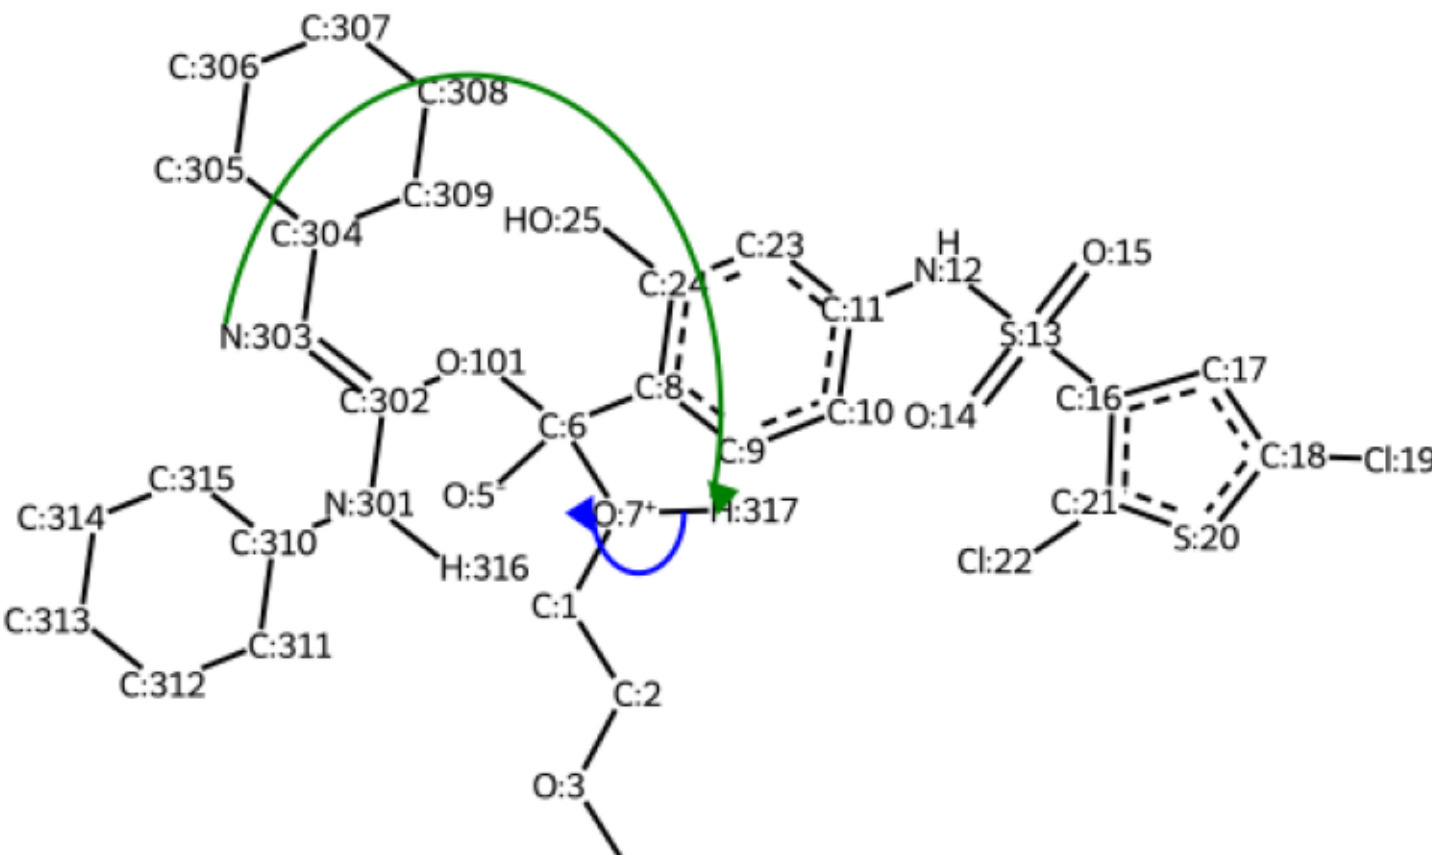

step #5

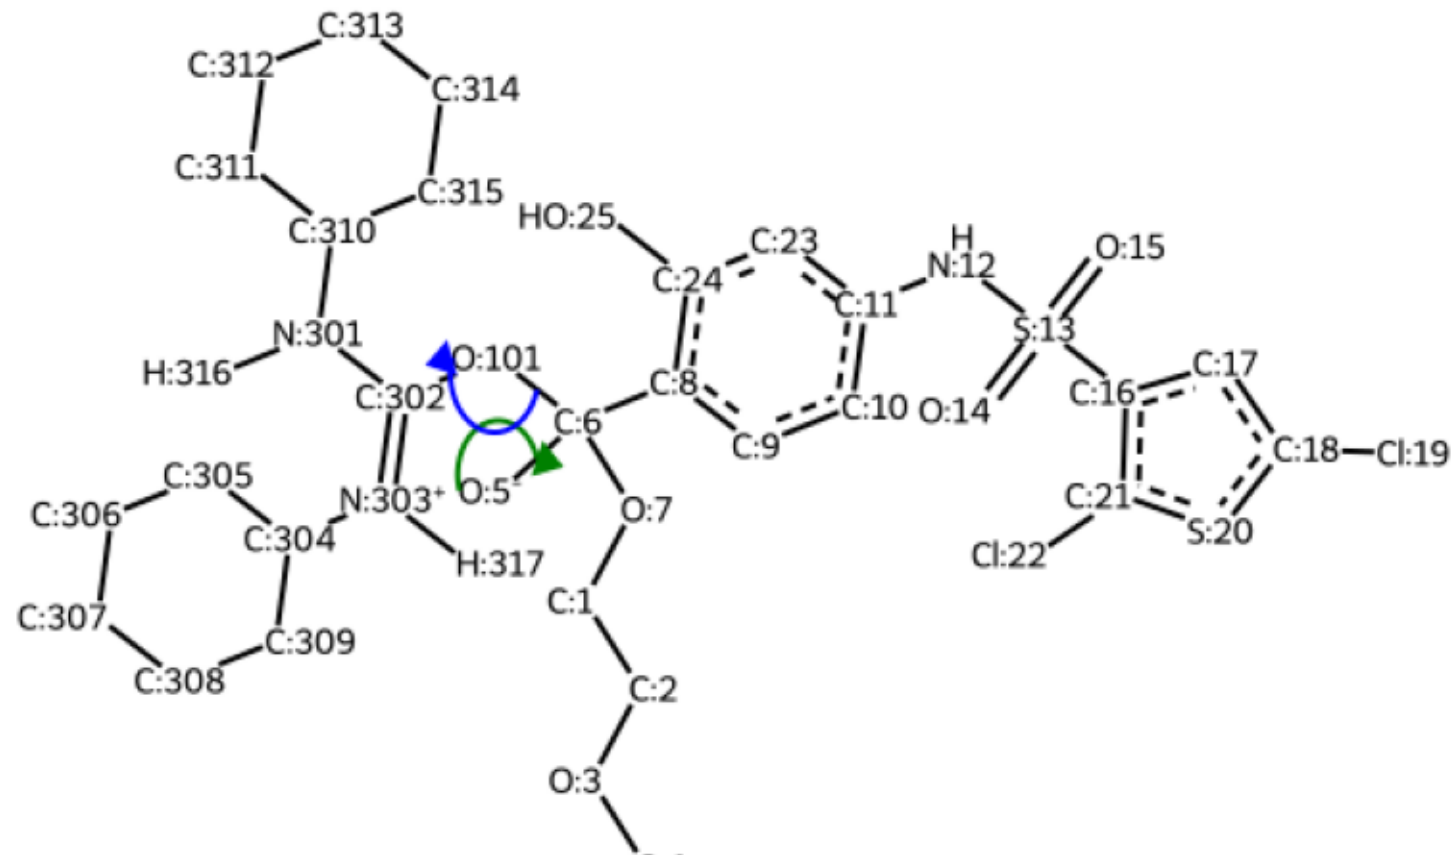

step #6

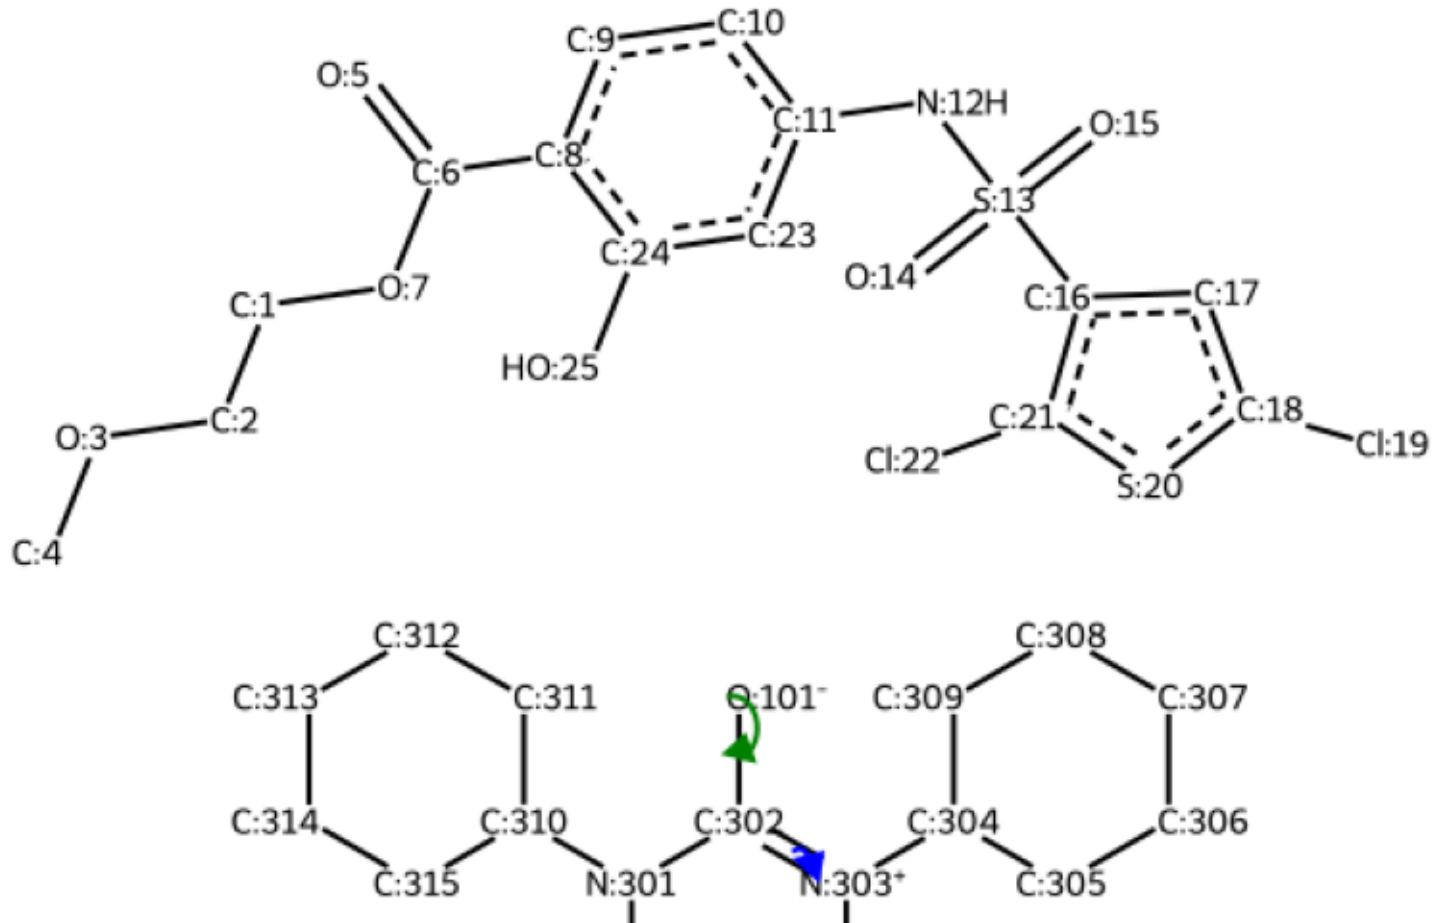

Product(s)

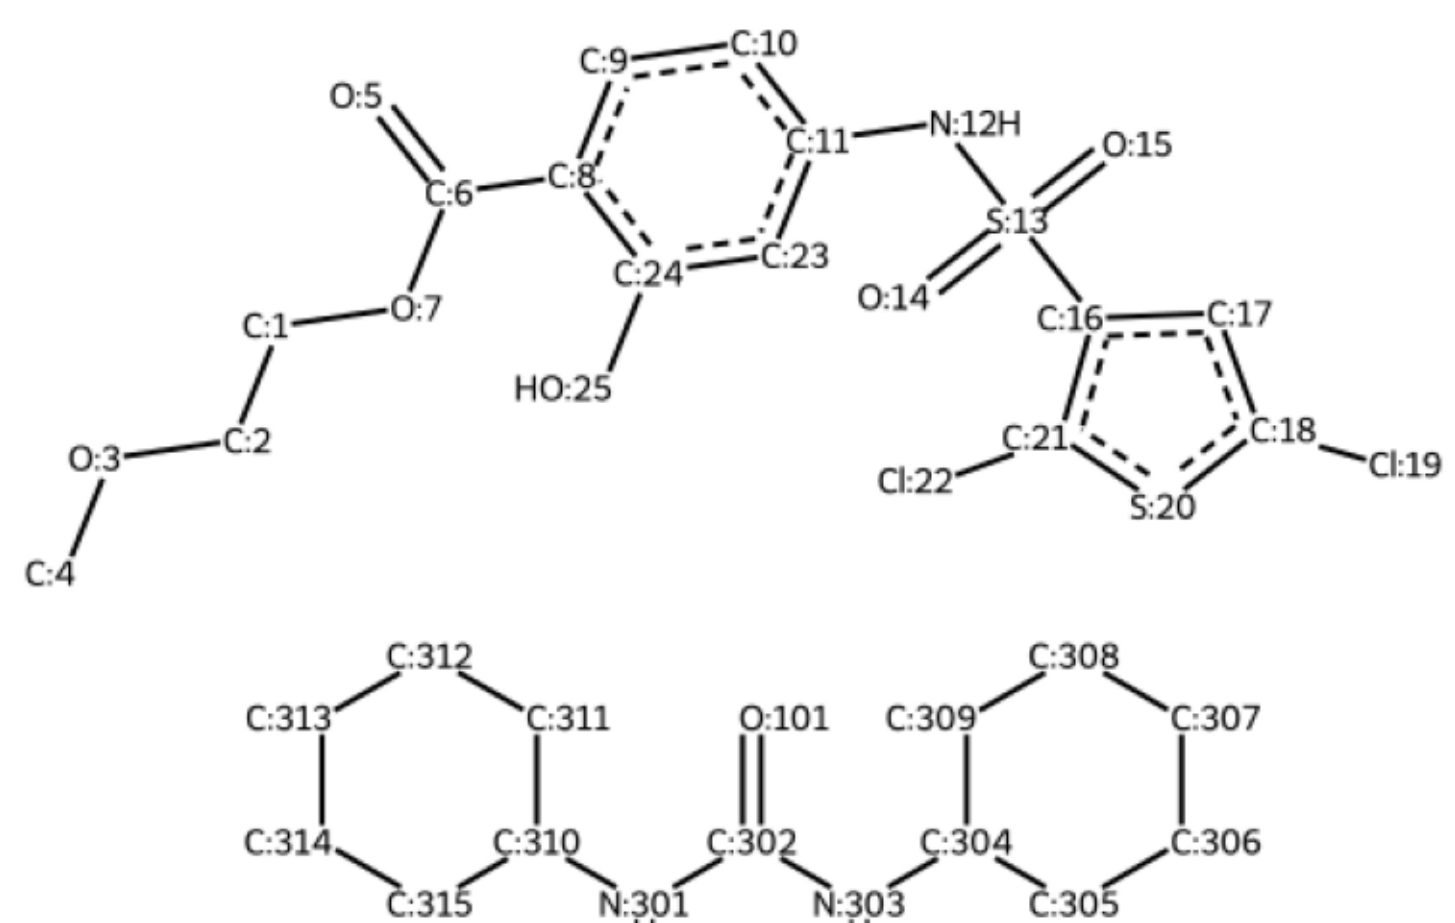



# Original reaction sampled RXN\_ID:2)

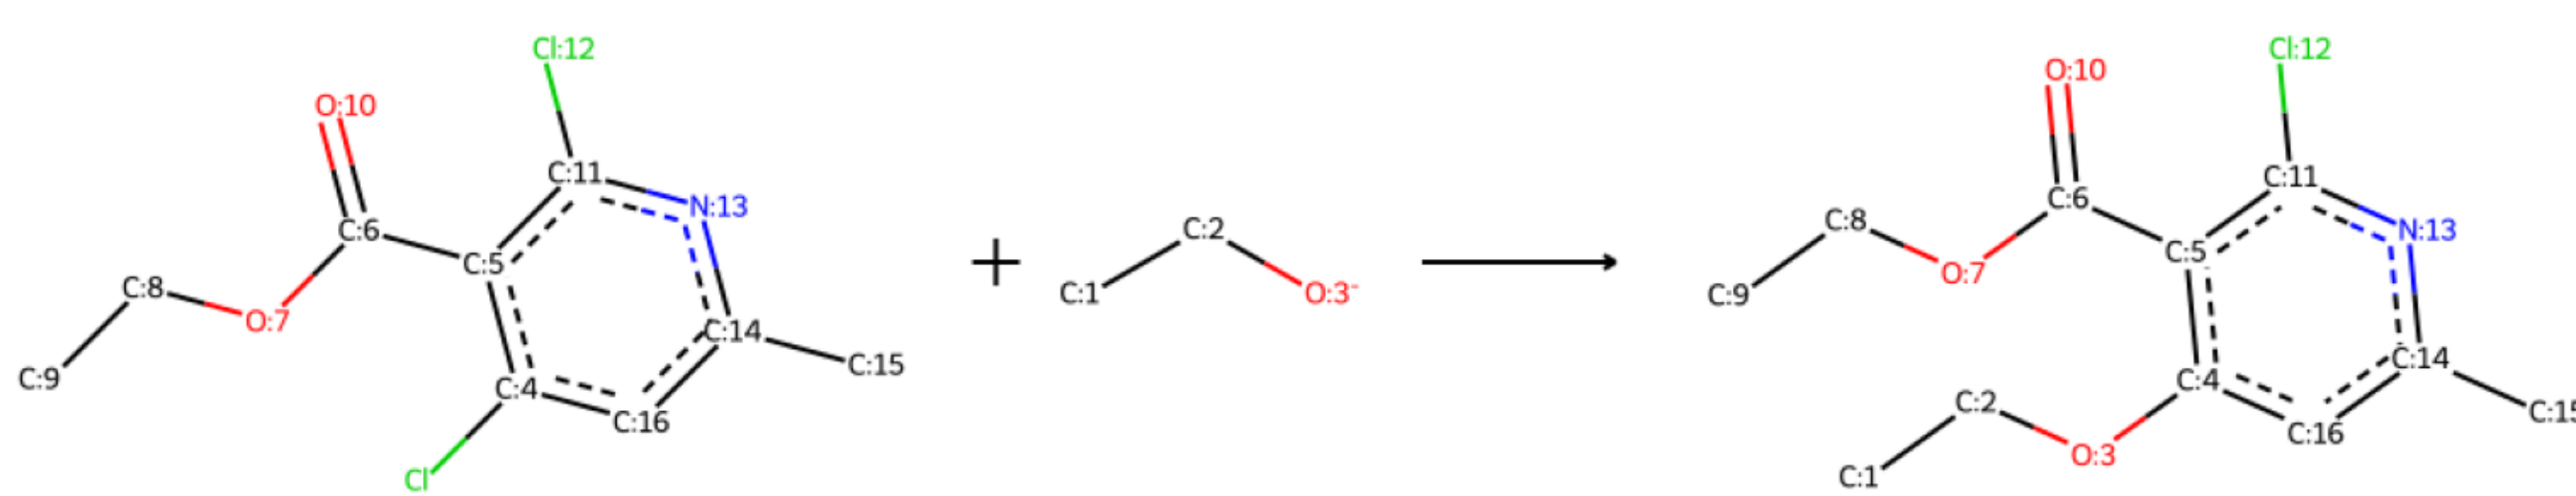

Identified mechanistic class -  
S<sub>N</sub>Ar<sub>alco(thi)ol(ortho)</sub> reaction

## Reaction with missing reagents recovered

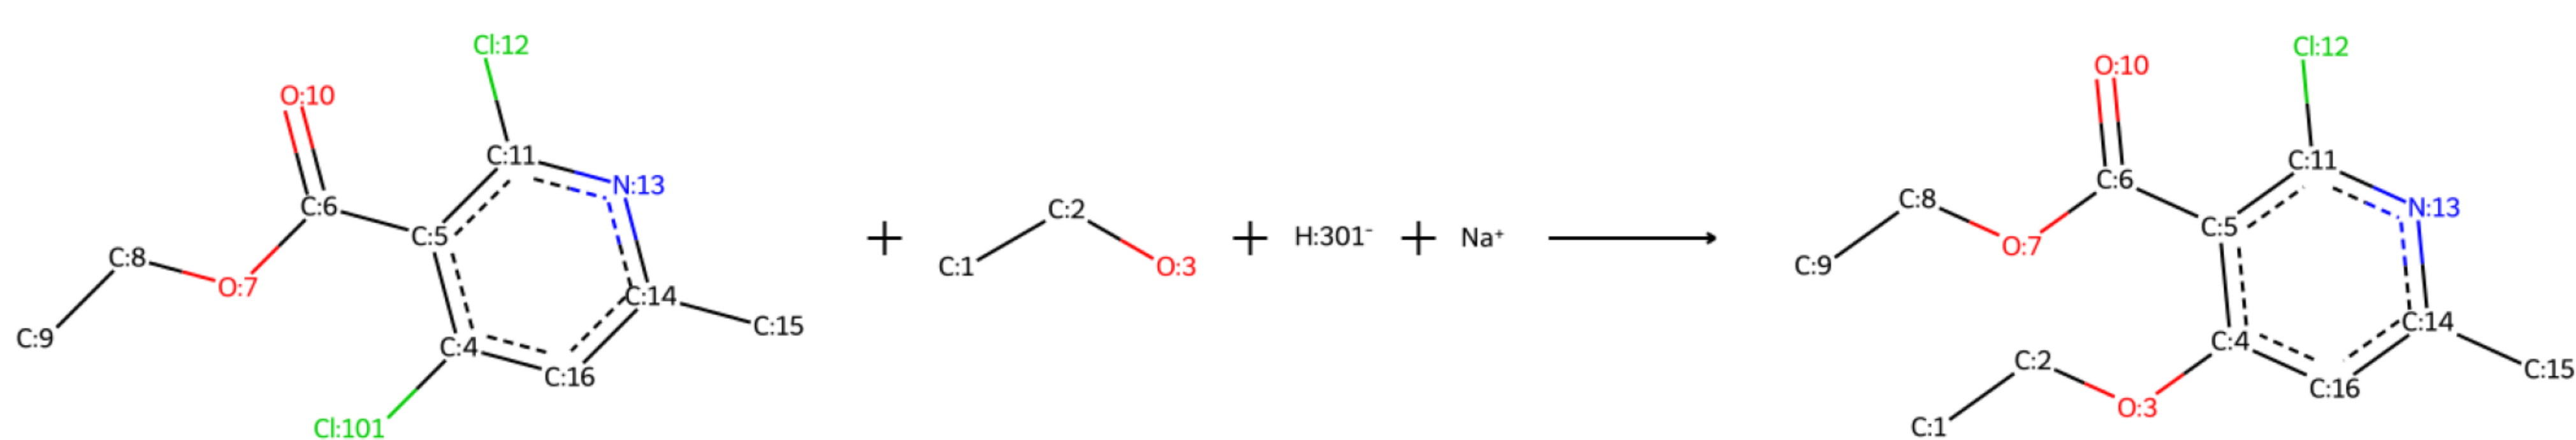

## Proposed mechanistic pathway

[Arrow order: (1) green, (2) blue, (3) red, (4) orange]

step #1

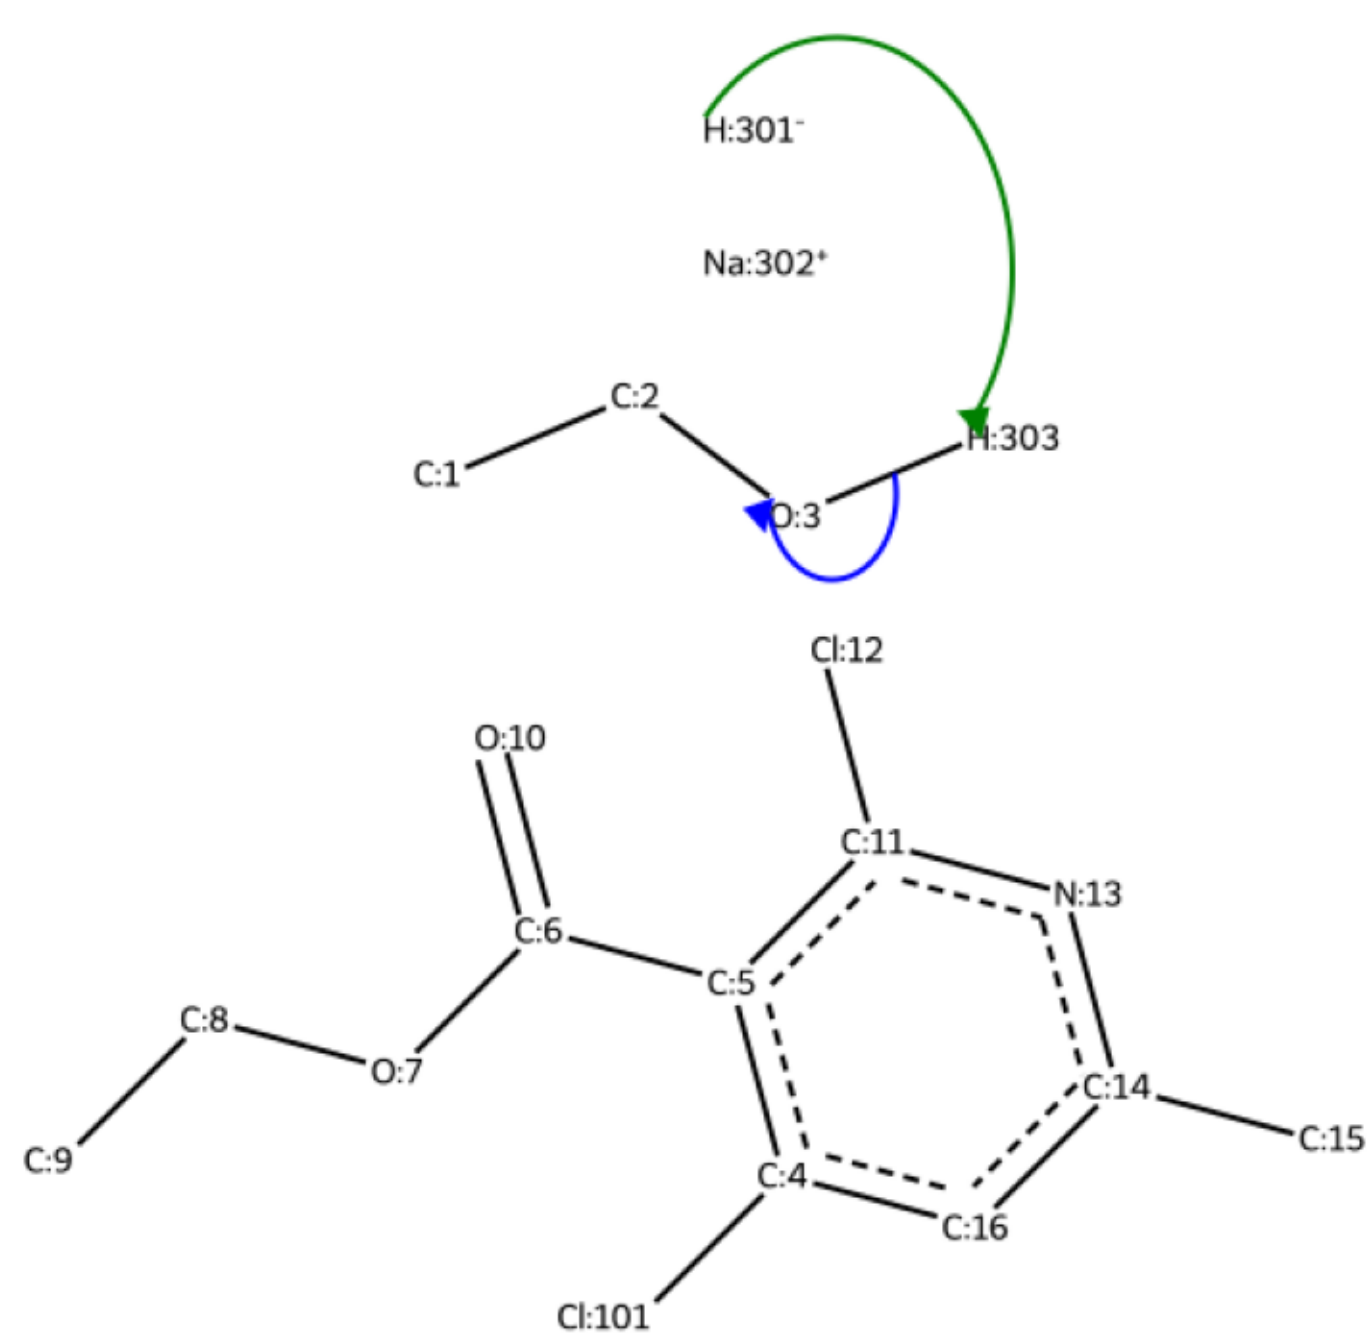

step #2

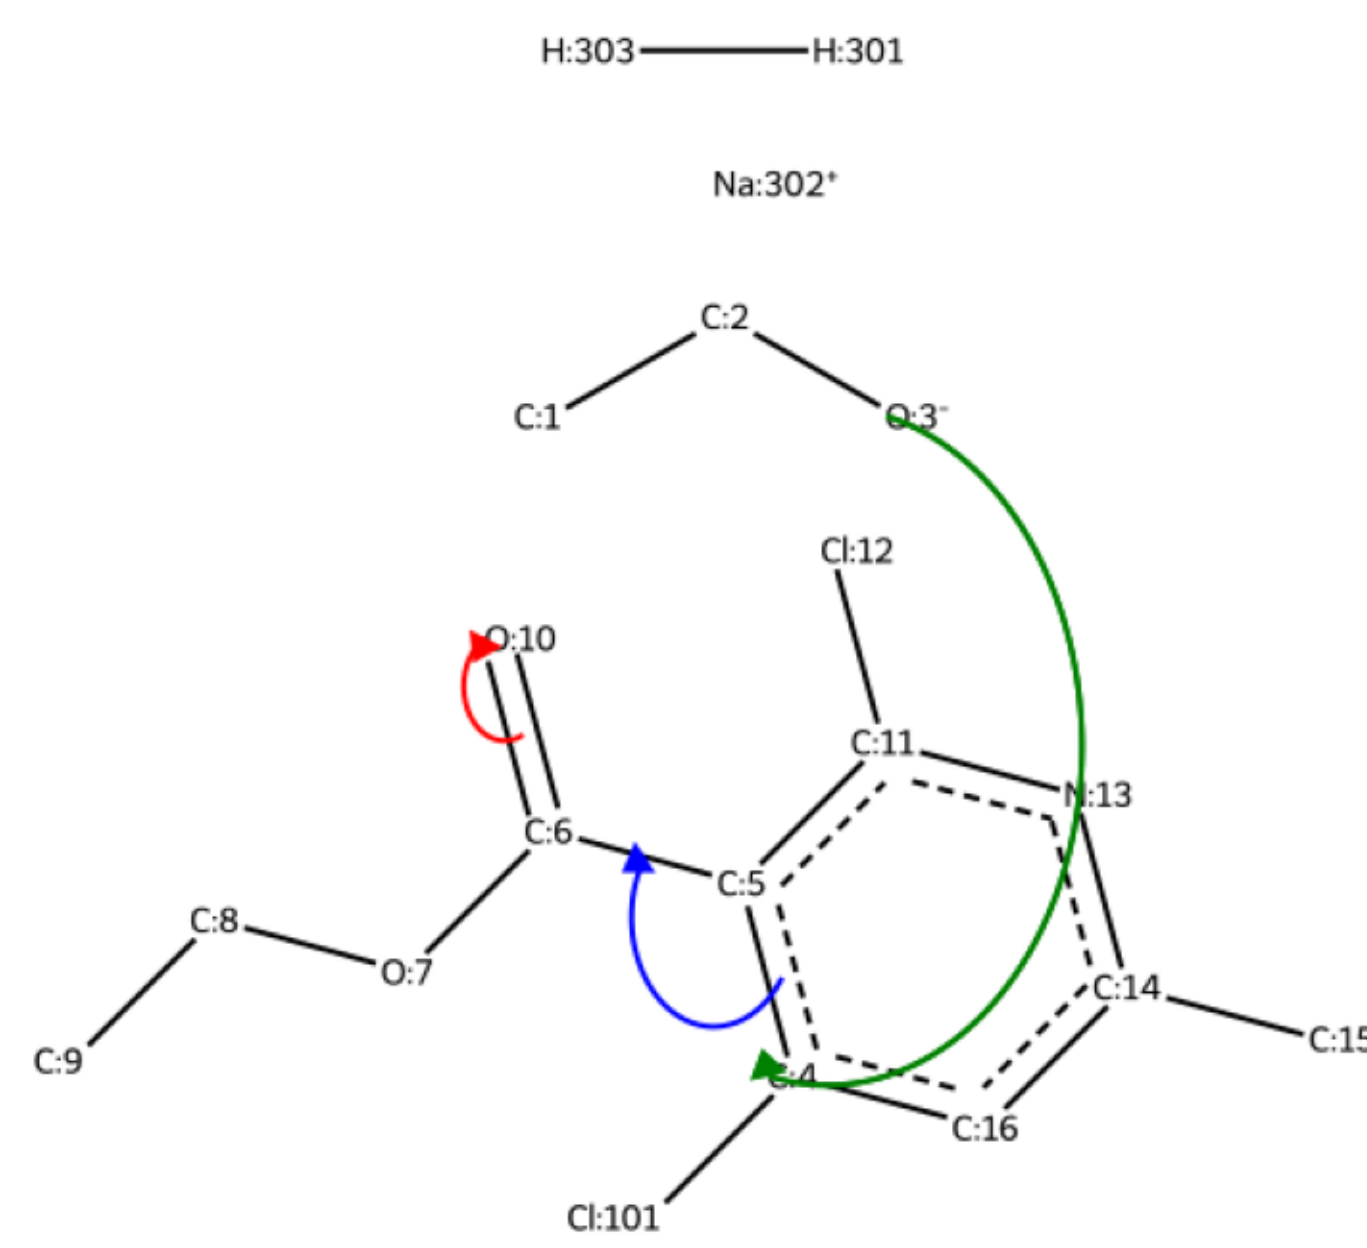

step #3

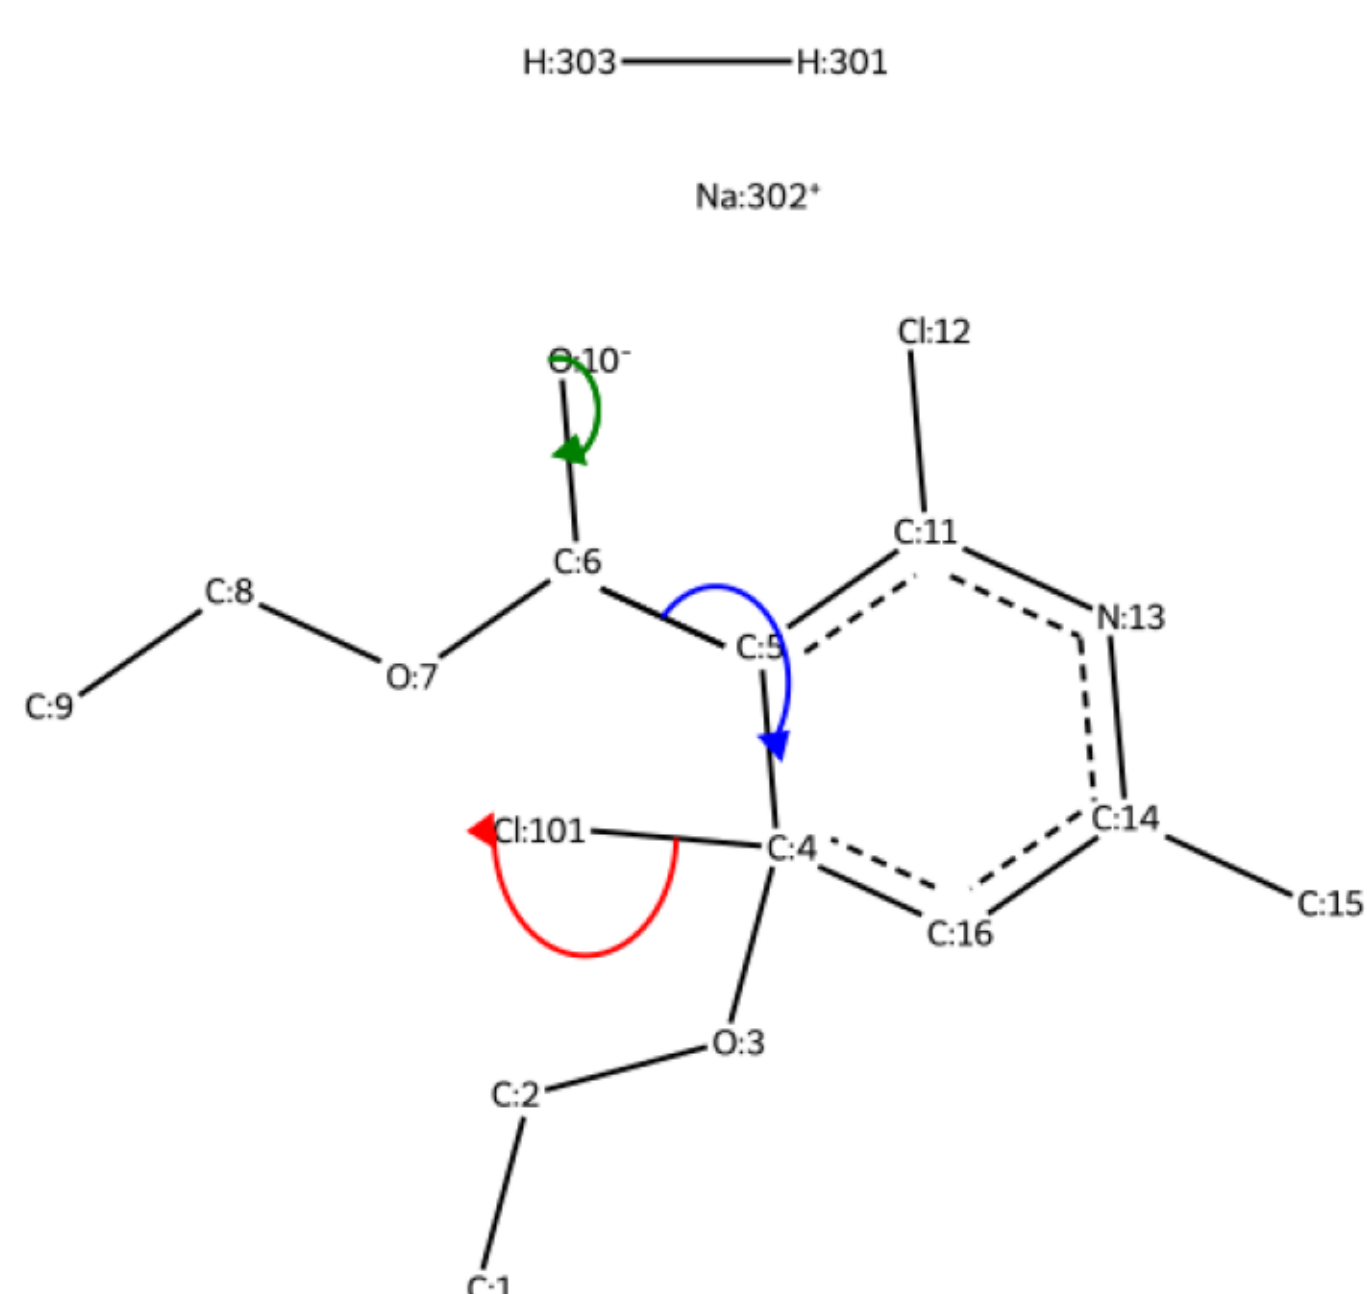

Product(s)

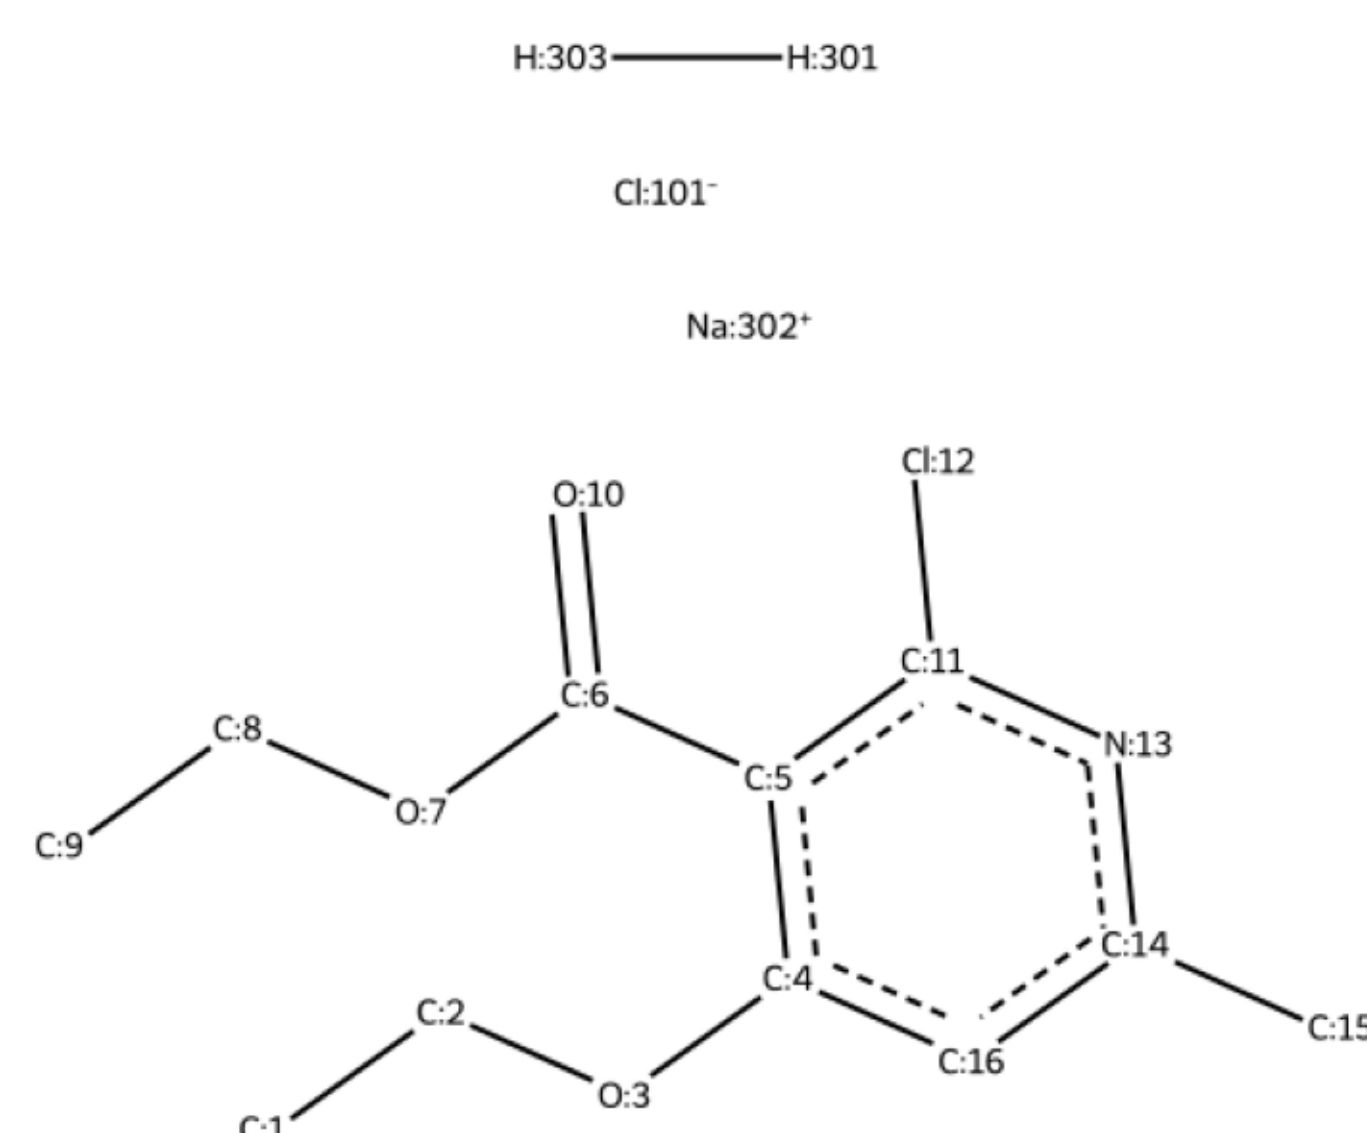

# Original reaction sampled RXN\_ID:3)

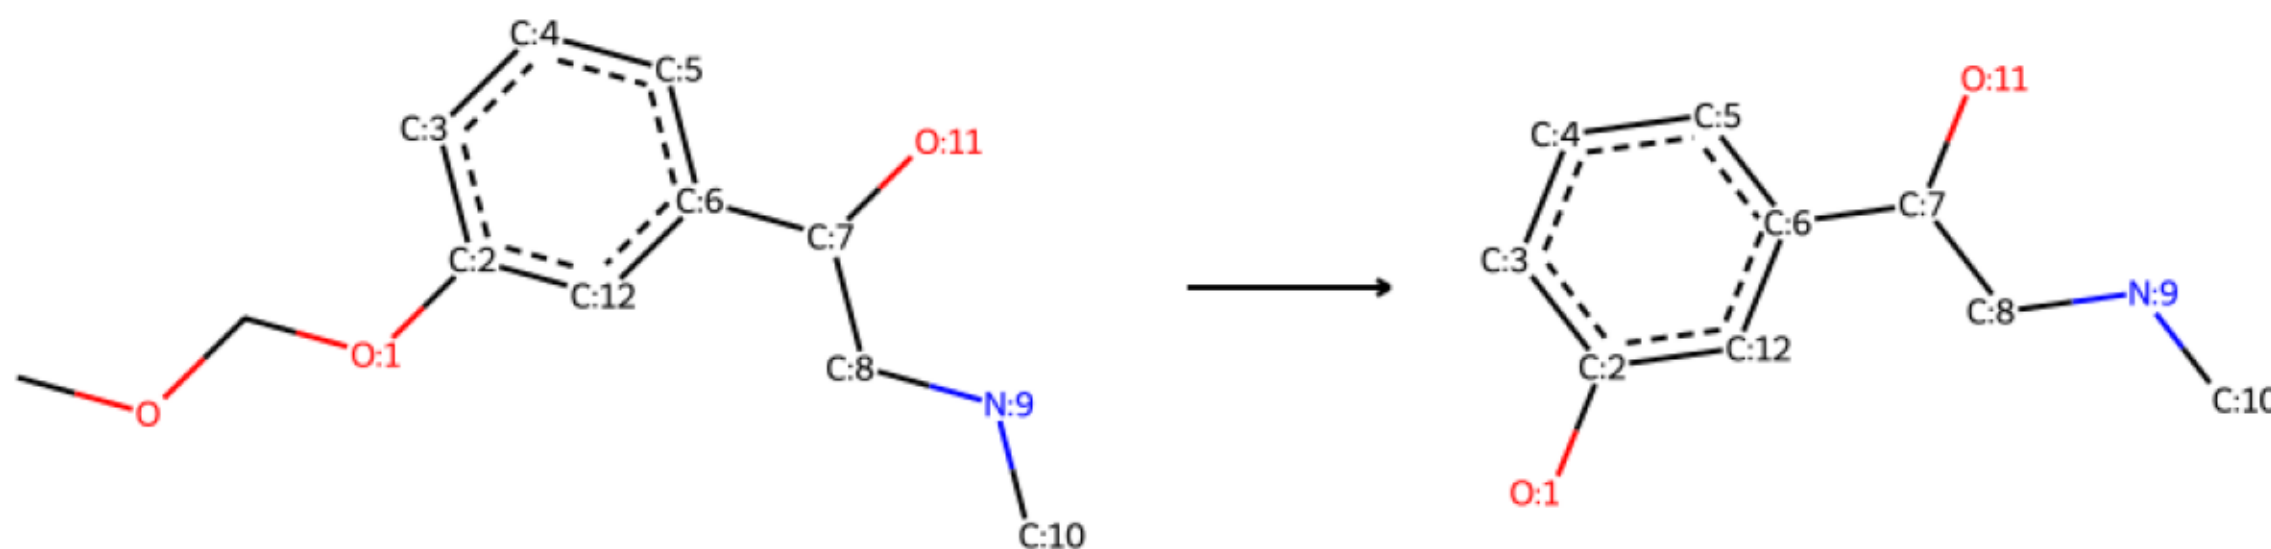

Identified mechanistic class -  
(hemi)acetal(amine)\_hydrolysis reaction

## Reaction with missing reagents recovered

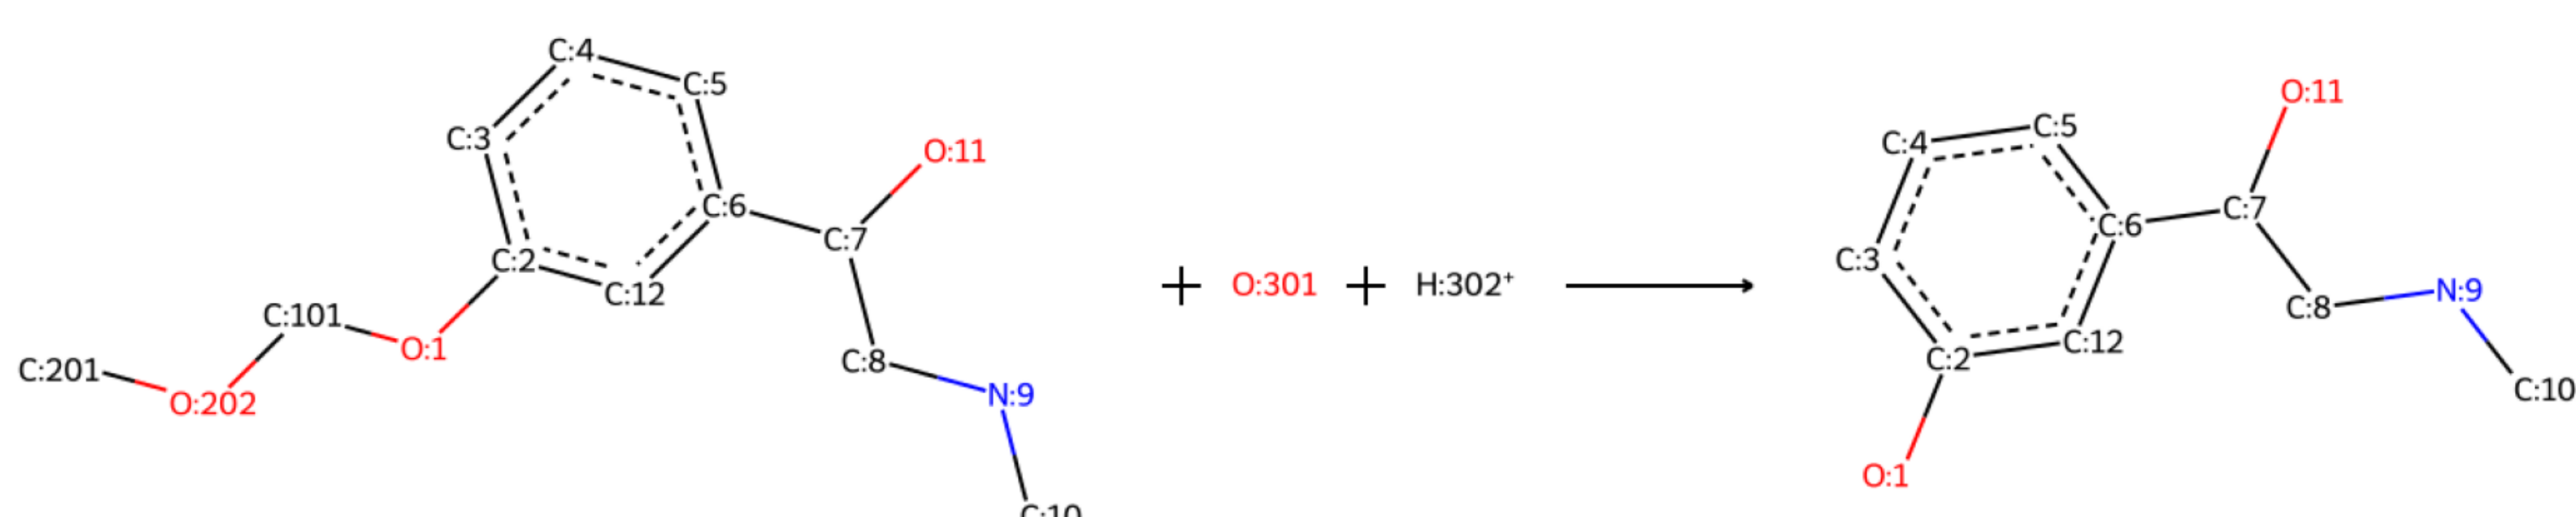

## Proposed mechanistic pathway

[Arrow order: (1) green, (2) blue, (3) red, (4) orange]

step #1

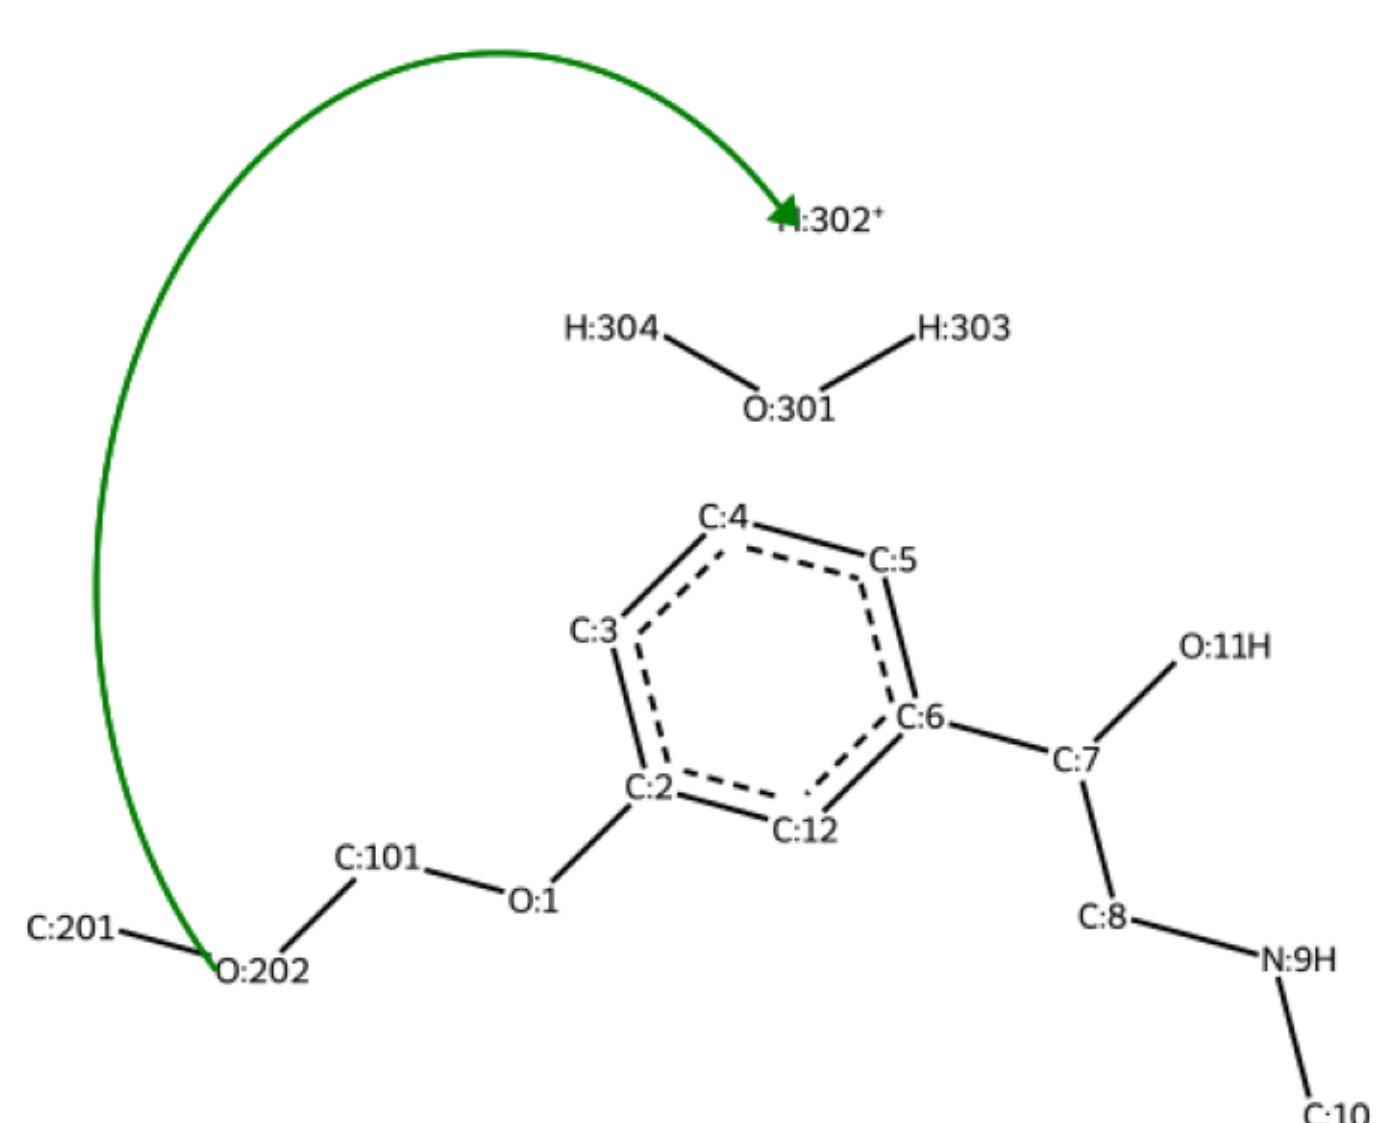

step #2

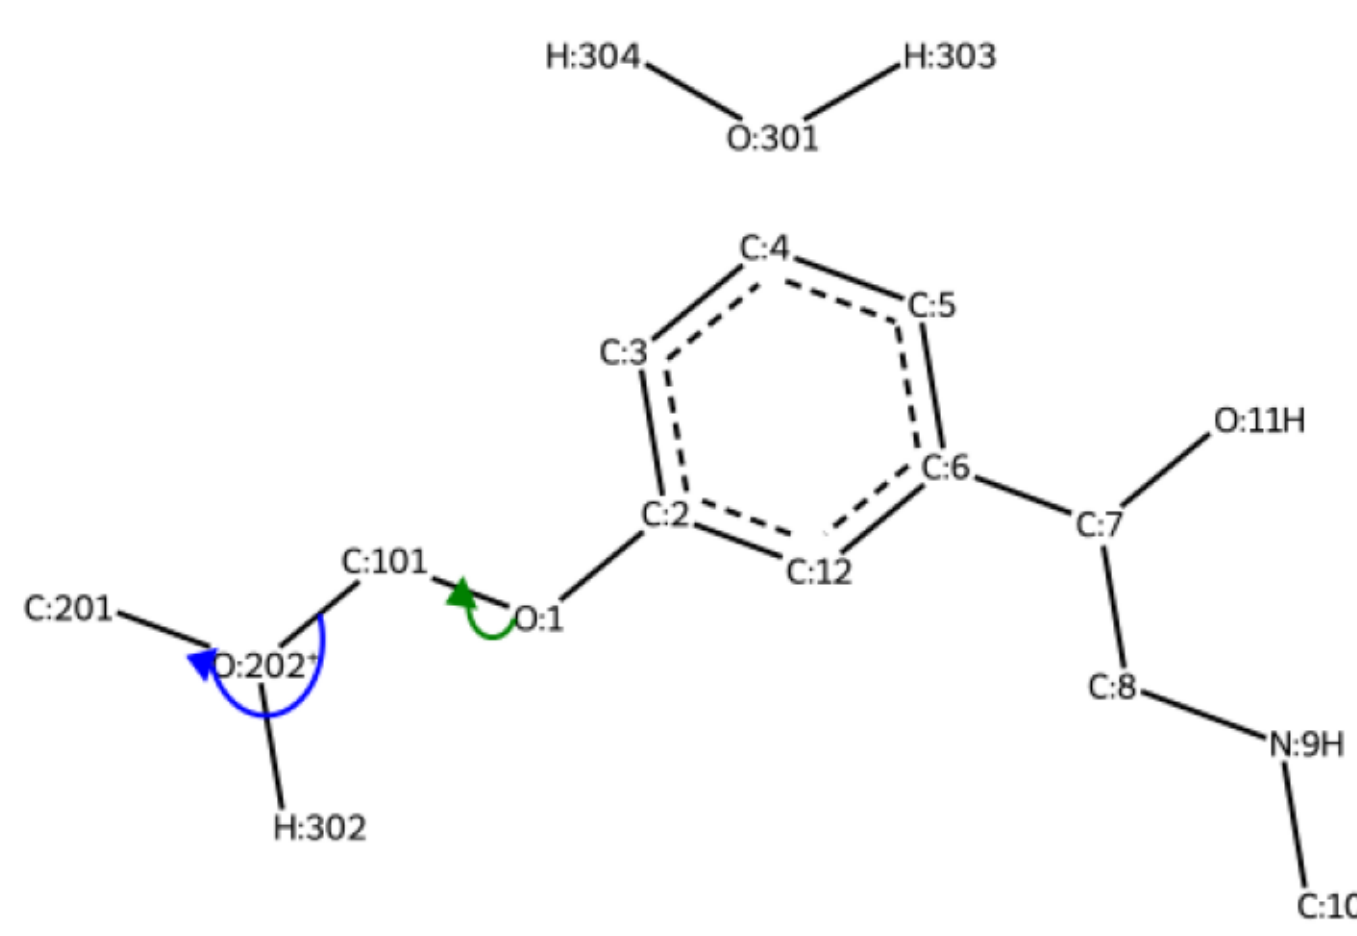

step #3

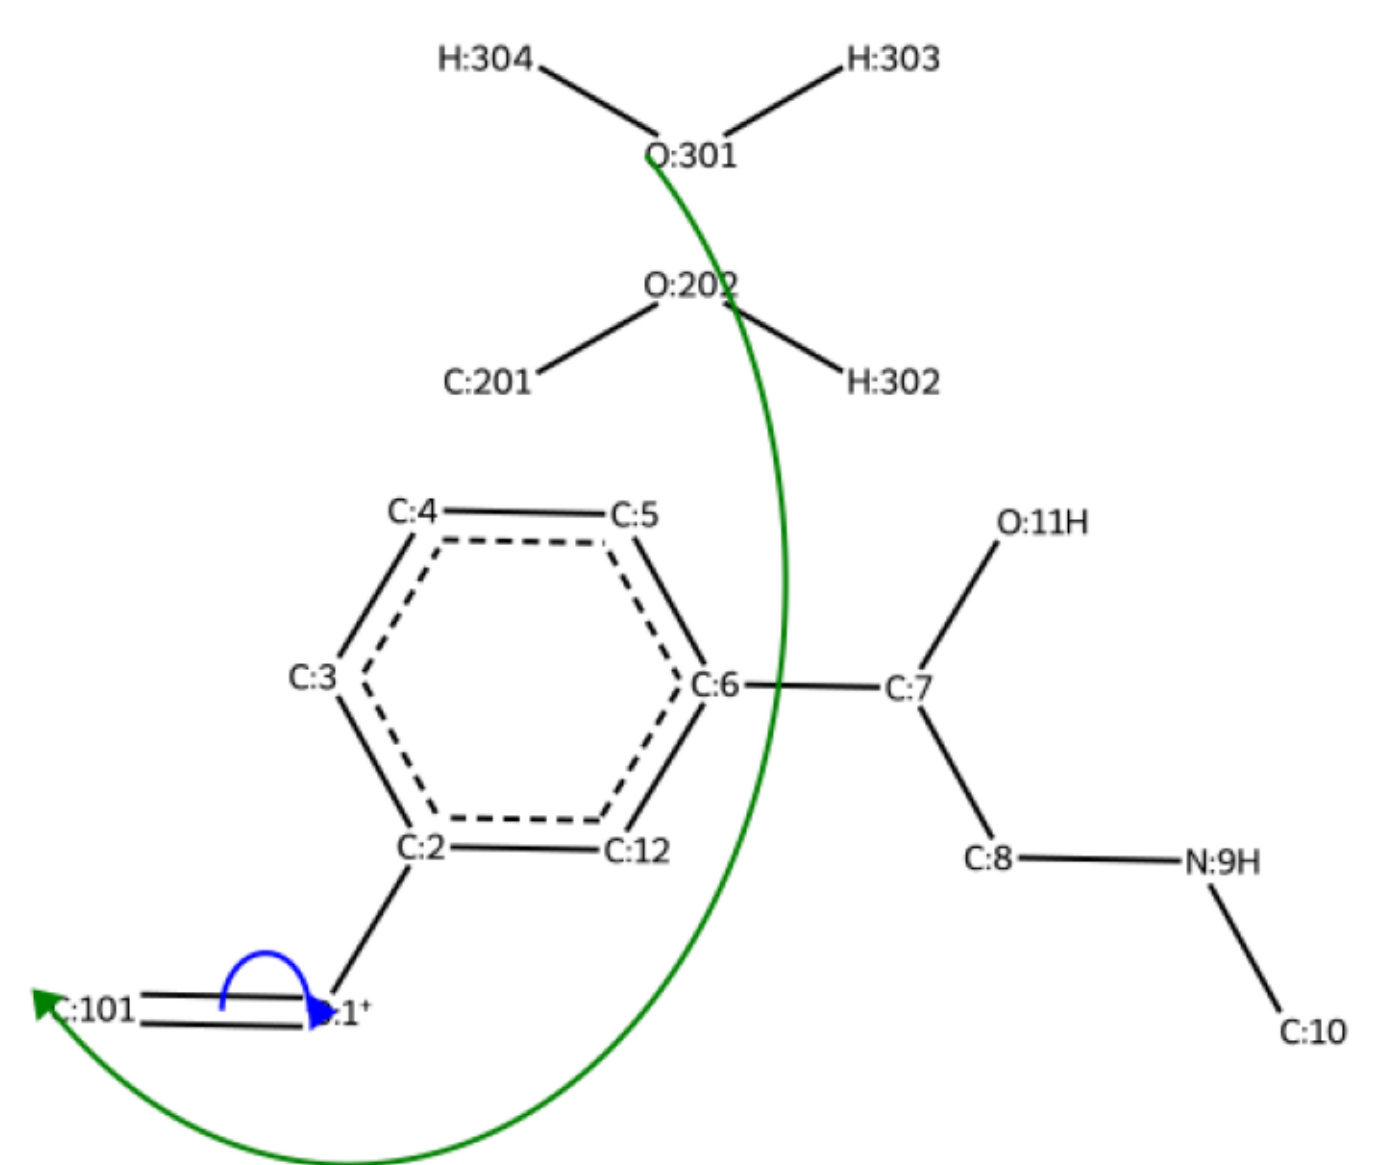

step #4

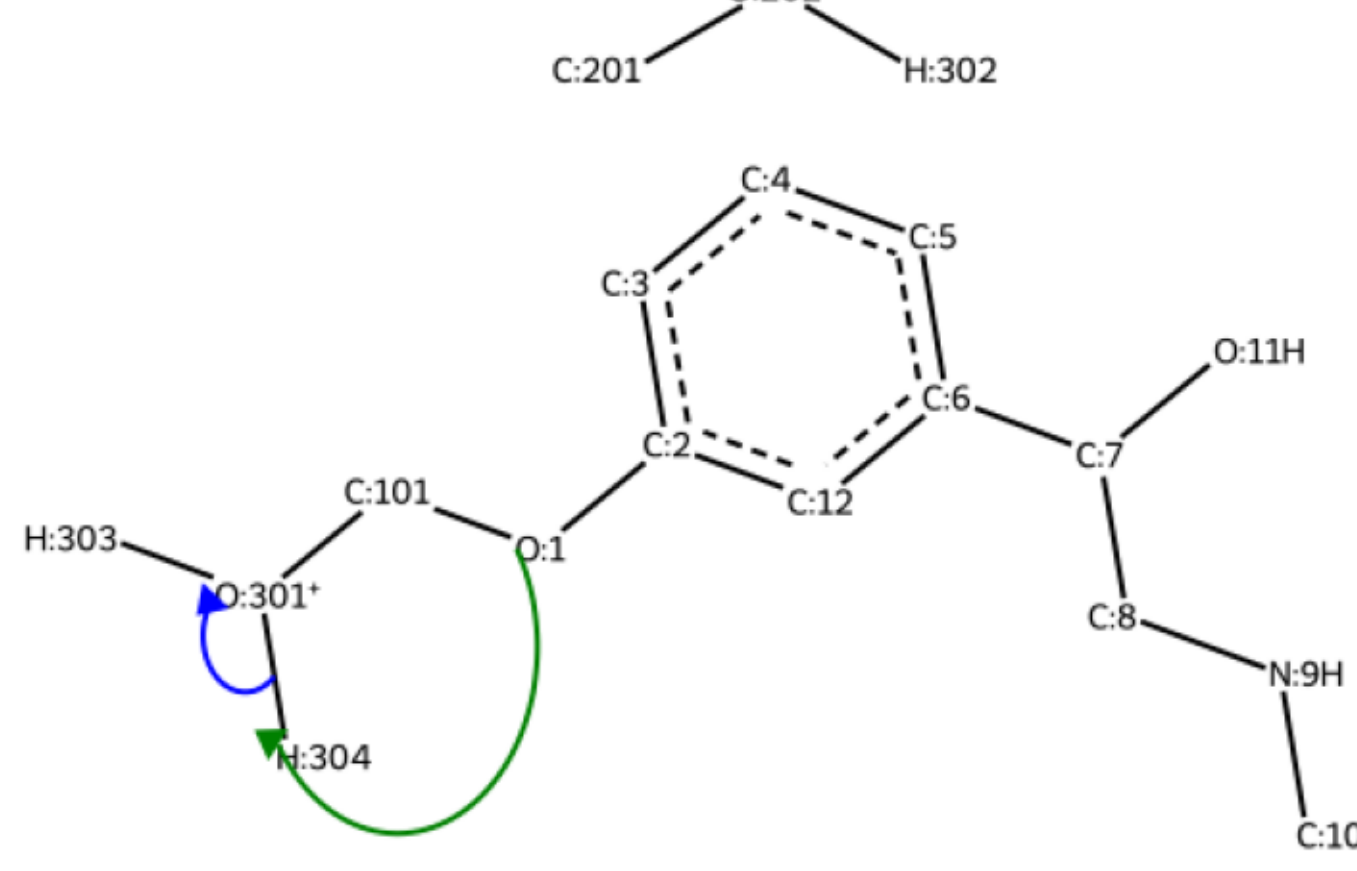

step #5

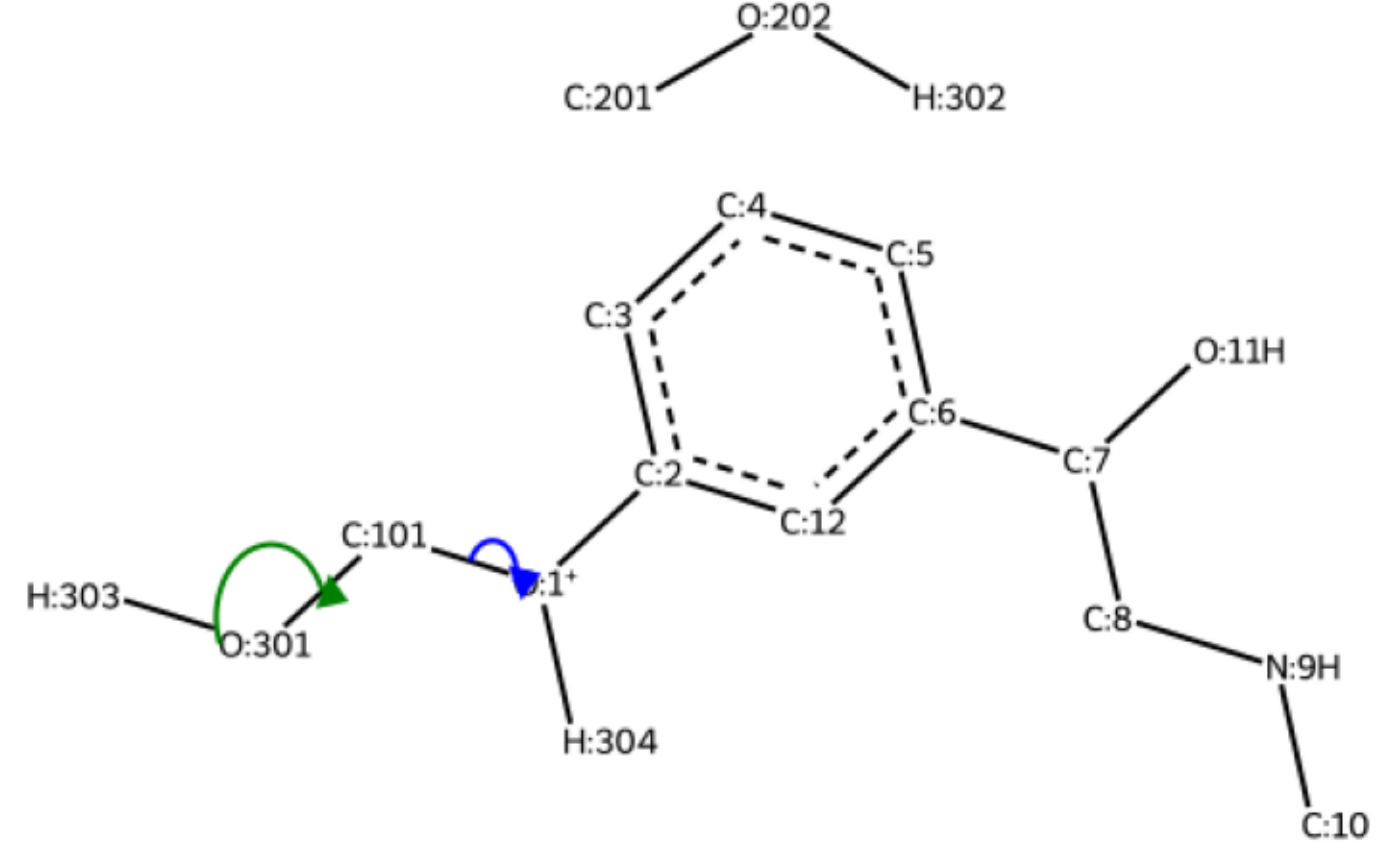

step #6

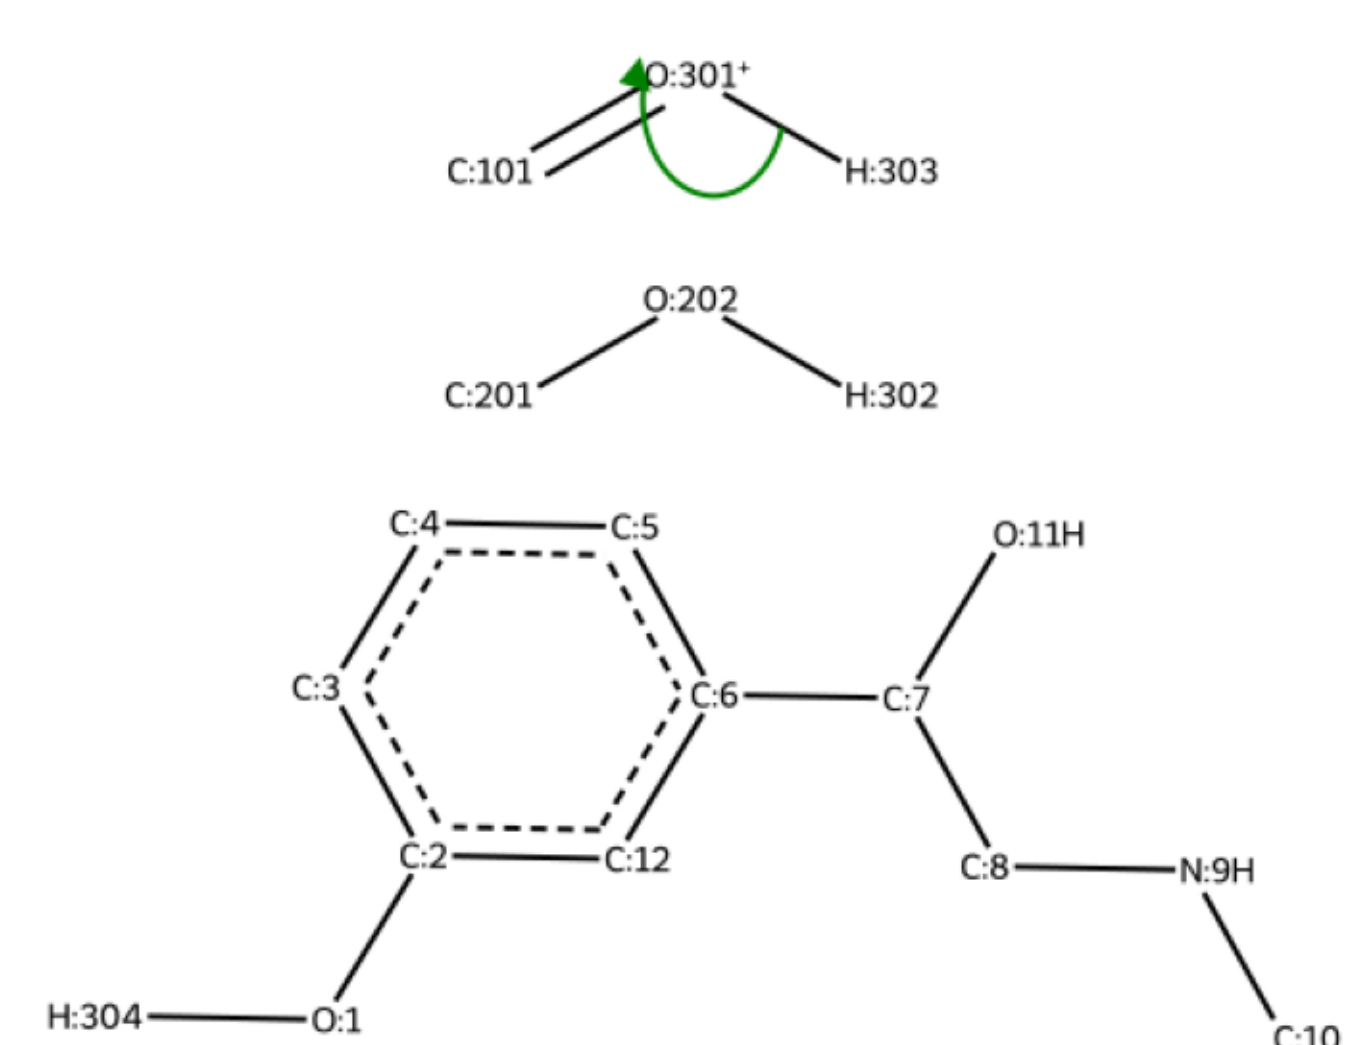

Product(s)

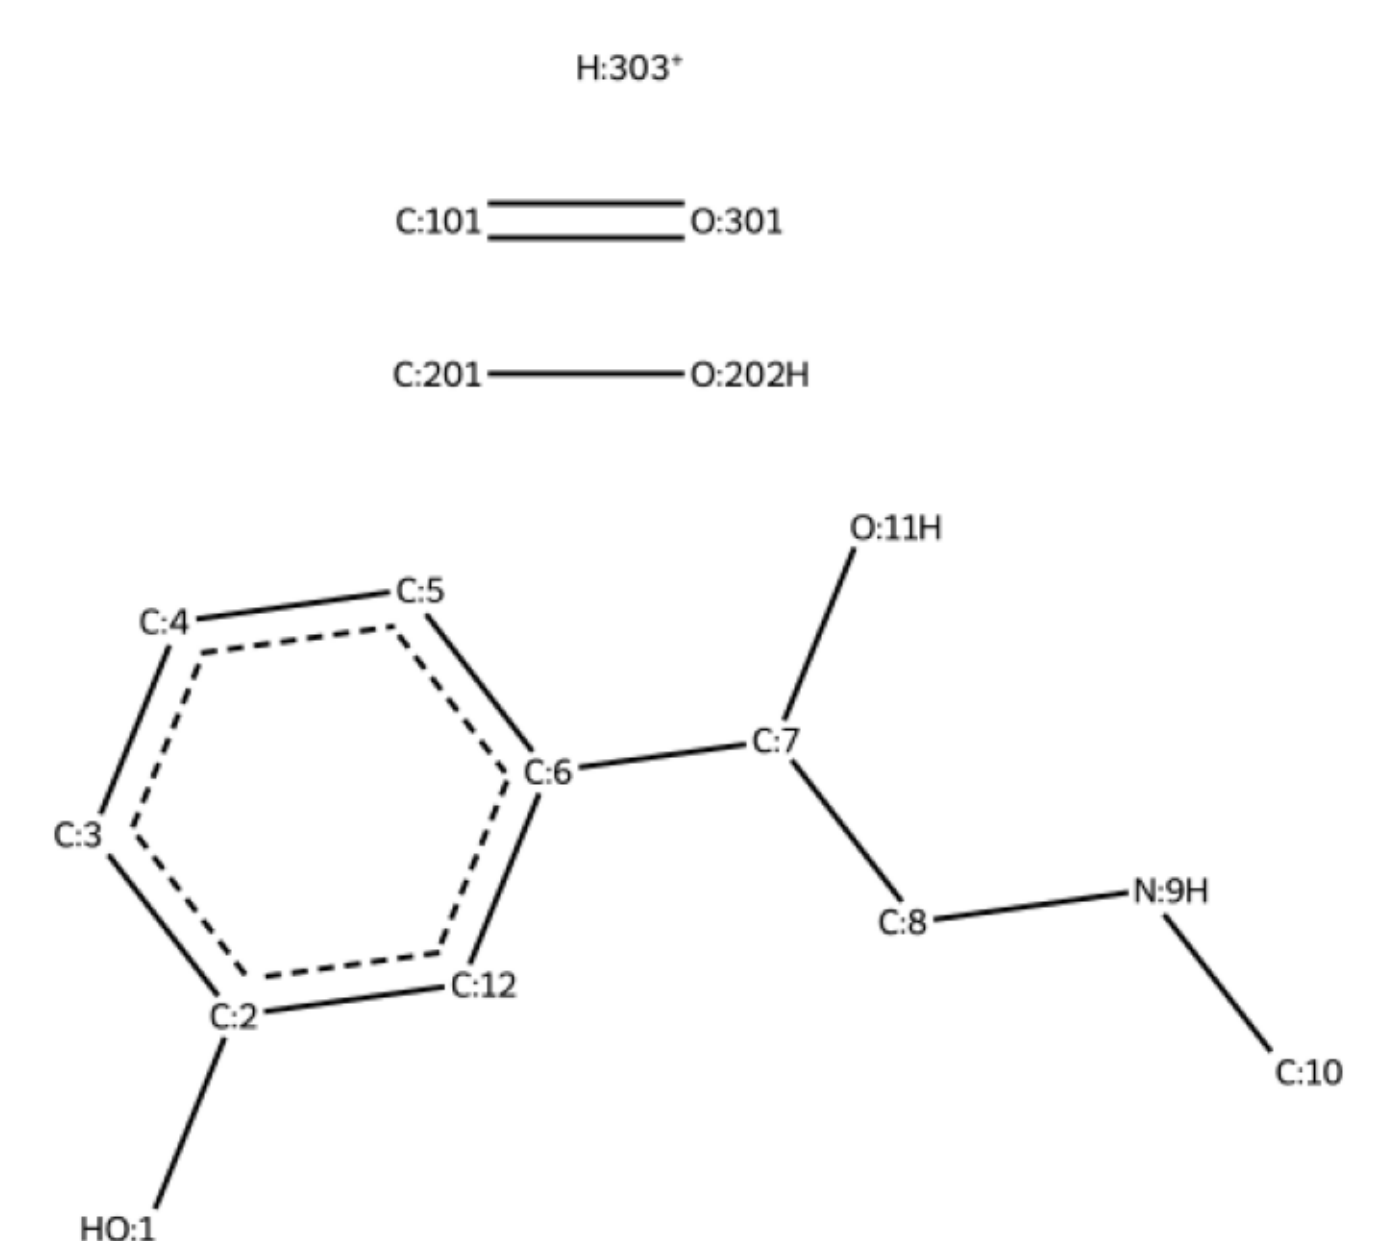



# Original reaction sampled RXN\_ID:4)

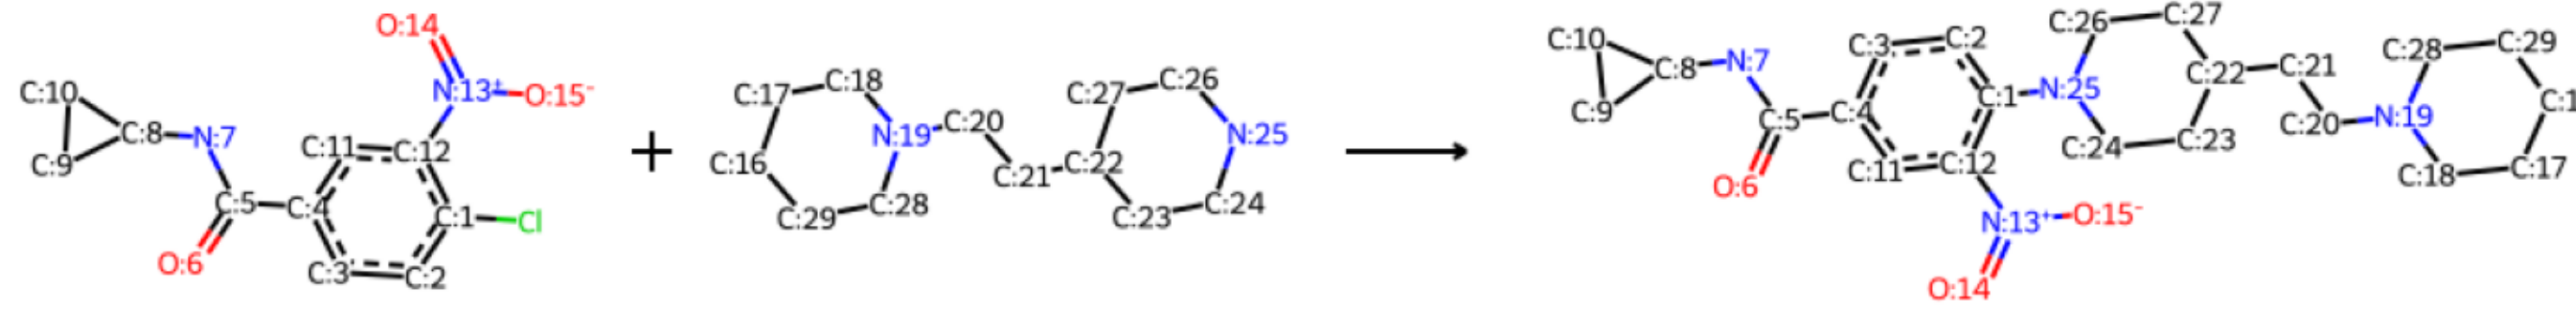

Identified mechanistic class -  
S<sub>N</sub>Ar(ortho) reaction

Reaction with missing reagents recovered

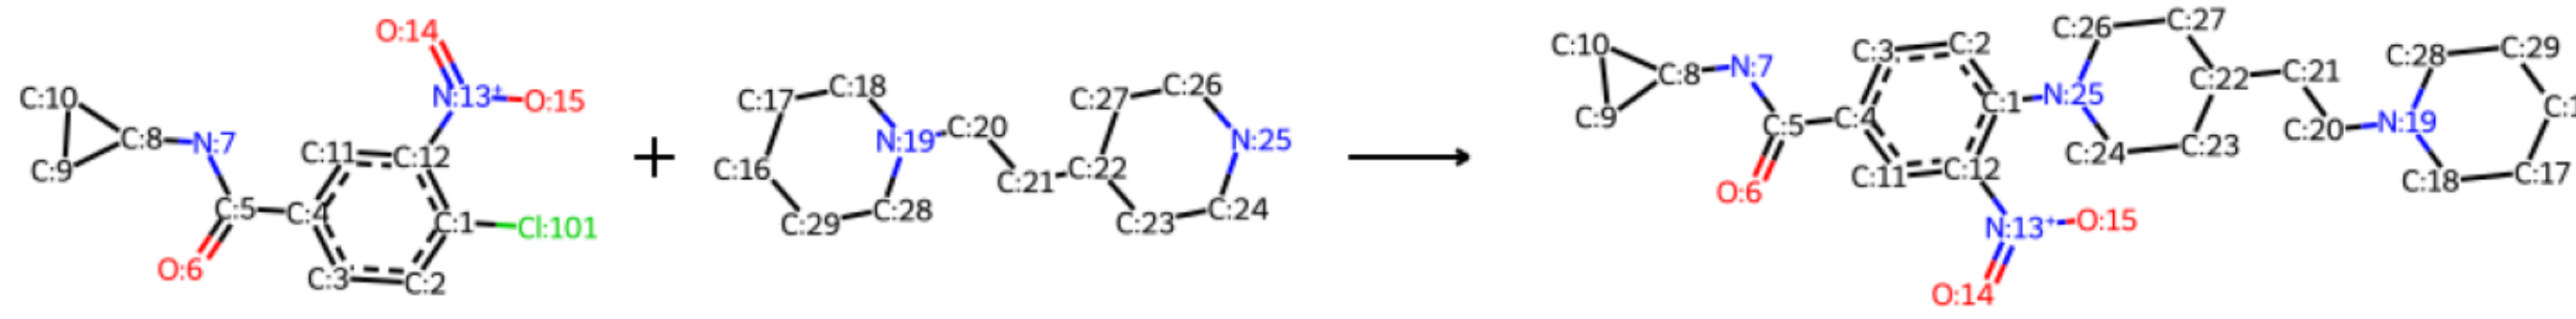

## Proposed mechanistic pathway

[Arrow order: (1) green, (2) blue, (3) red, (4) orange]

step #1

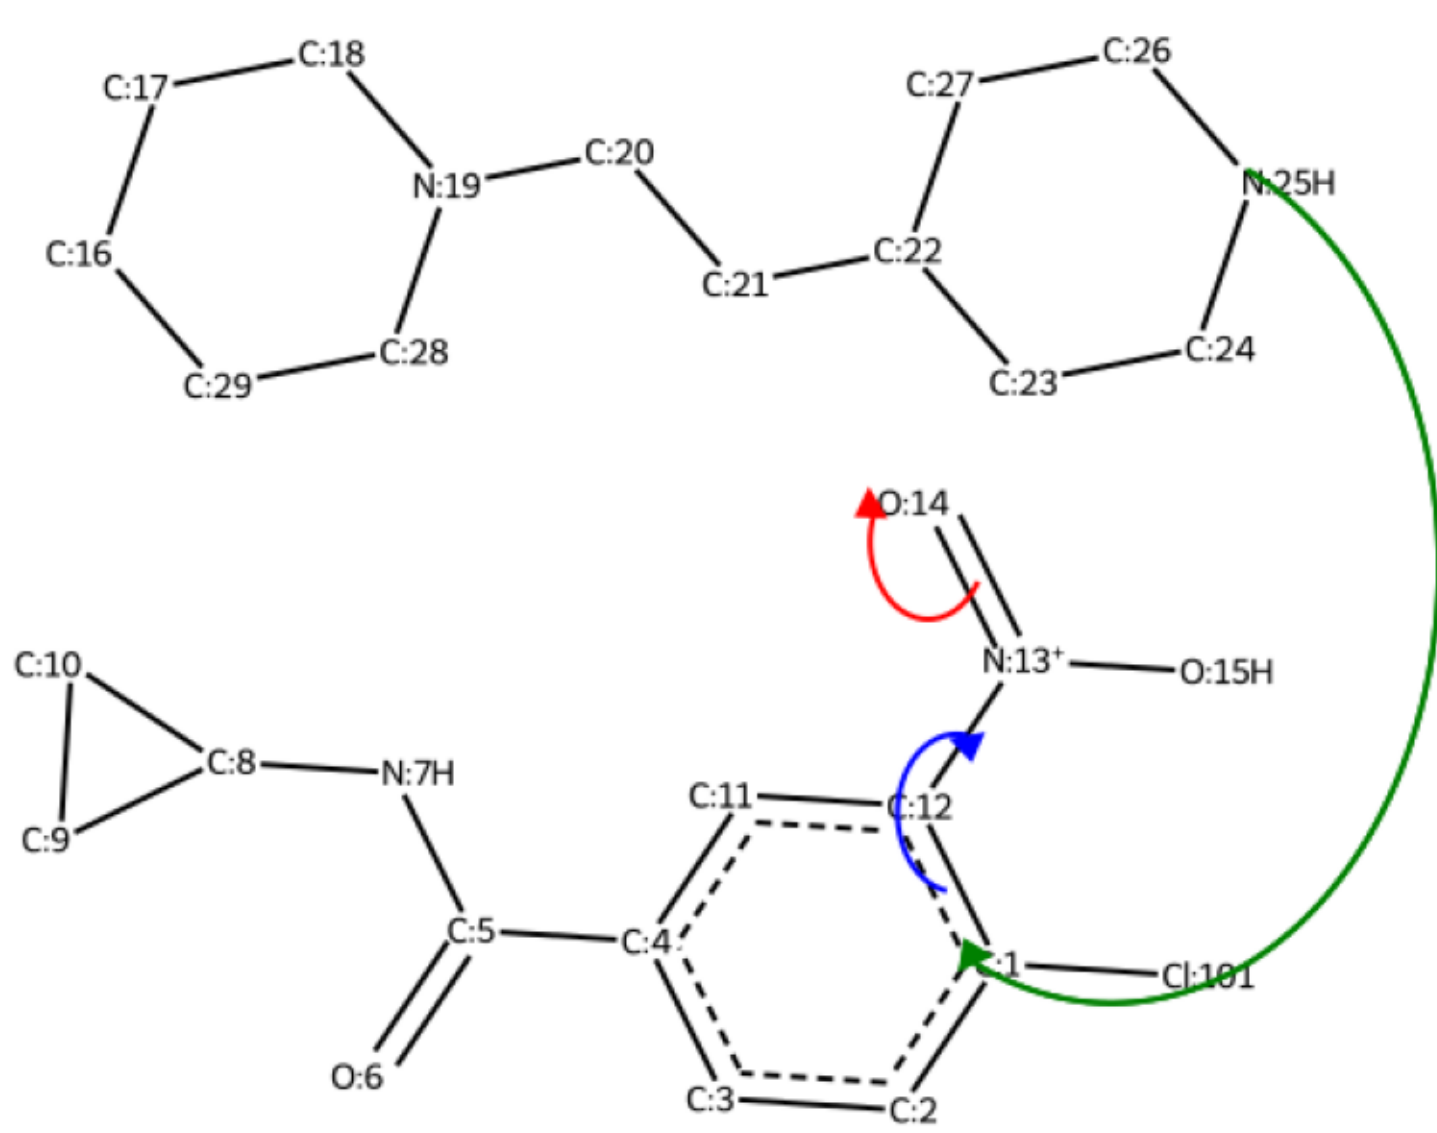

step #2

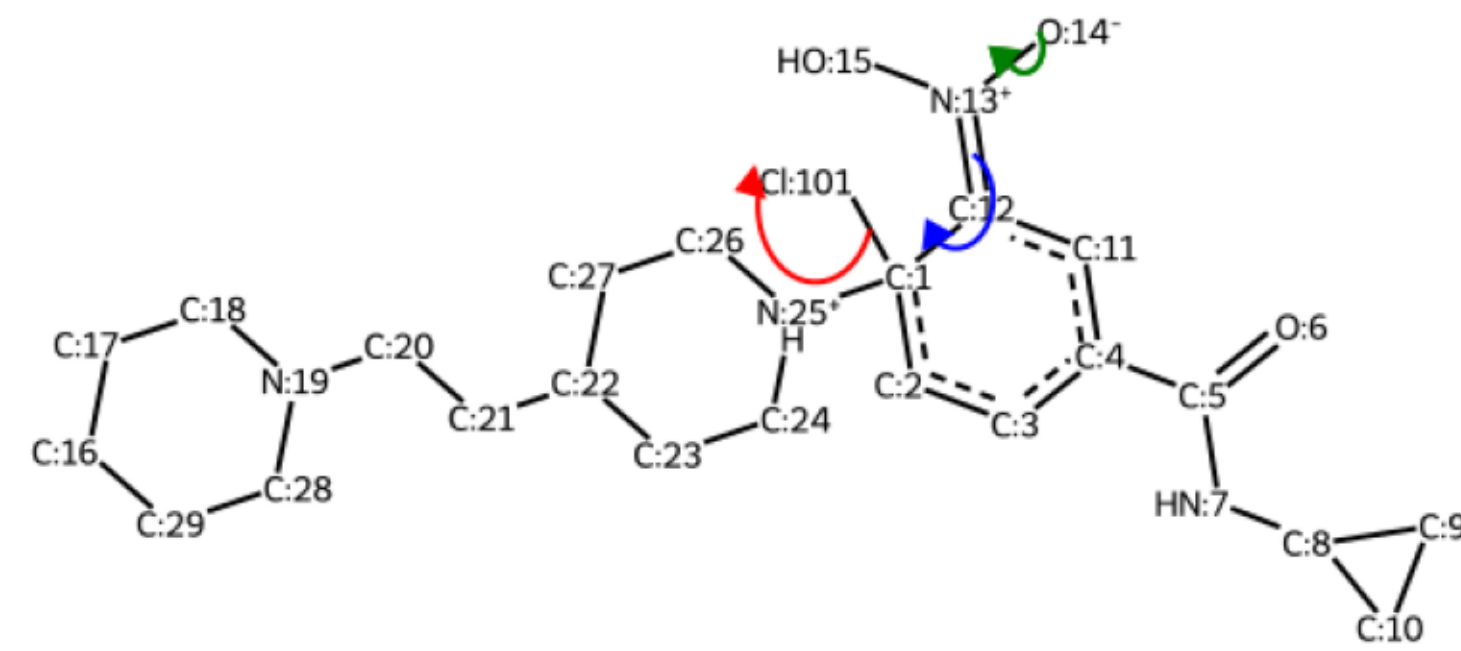

Product(s)

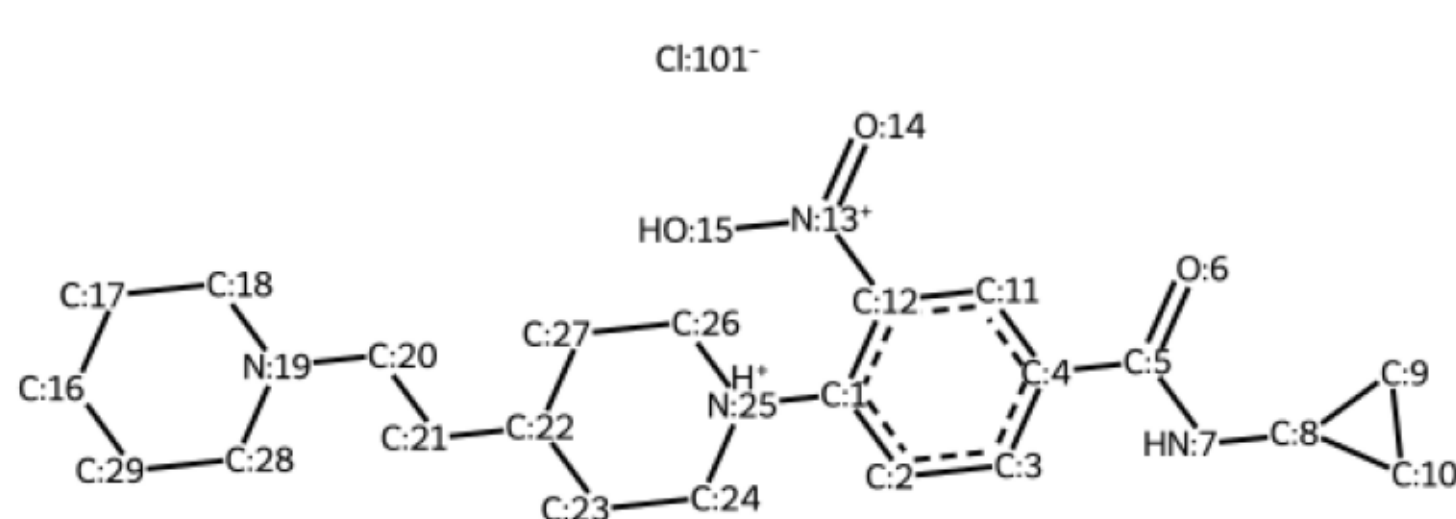

proton transfer

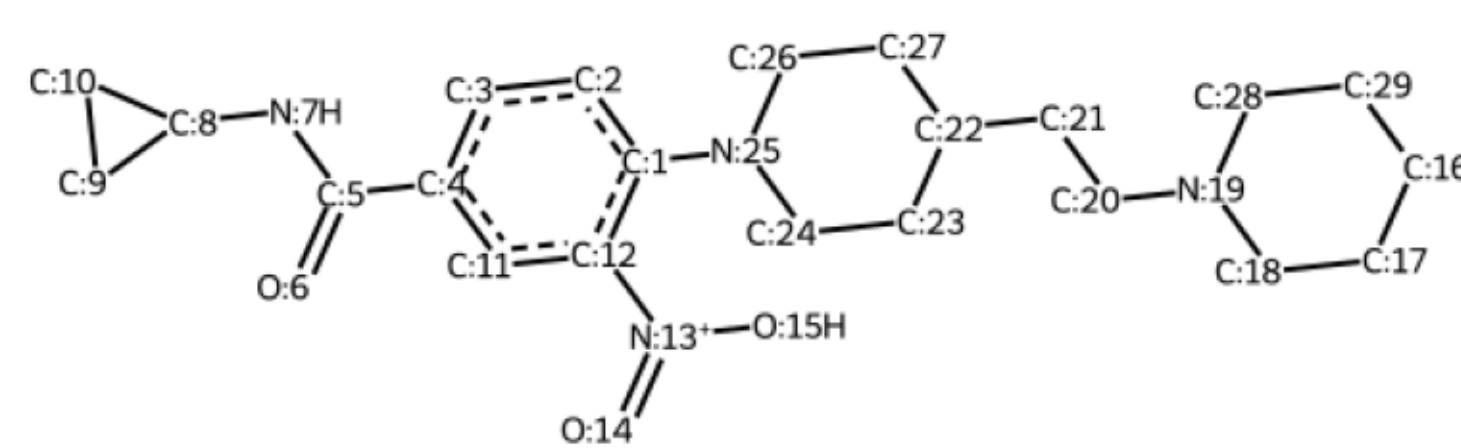



Original reaction  
sampled RXN\_ID:5)

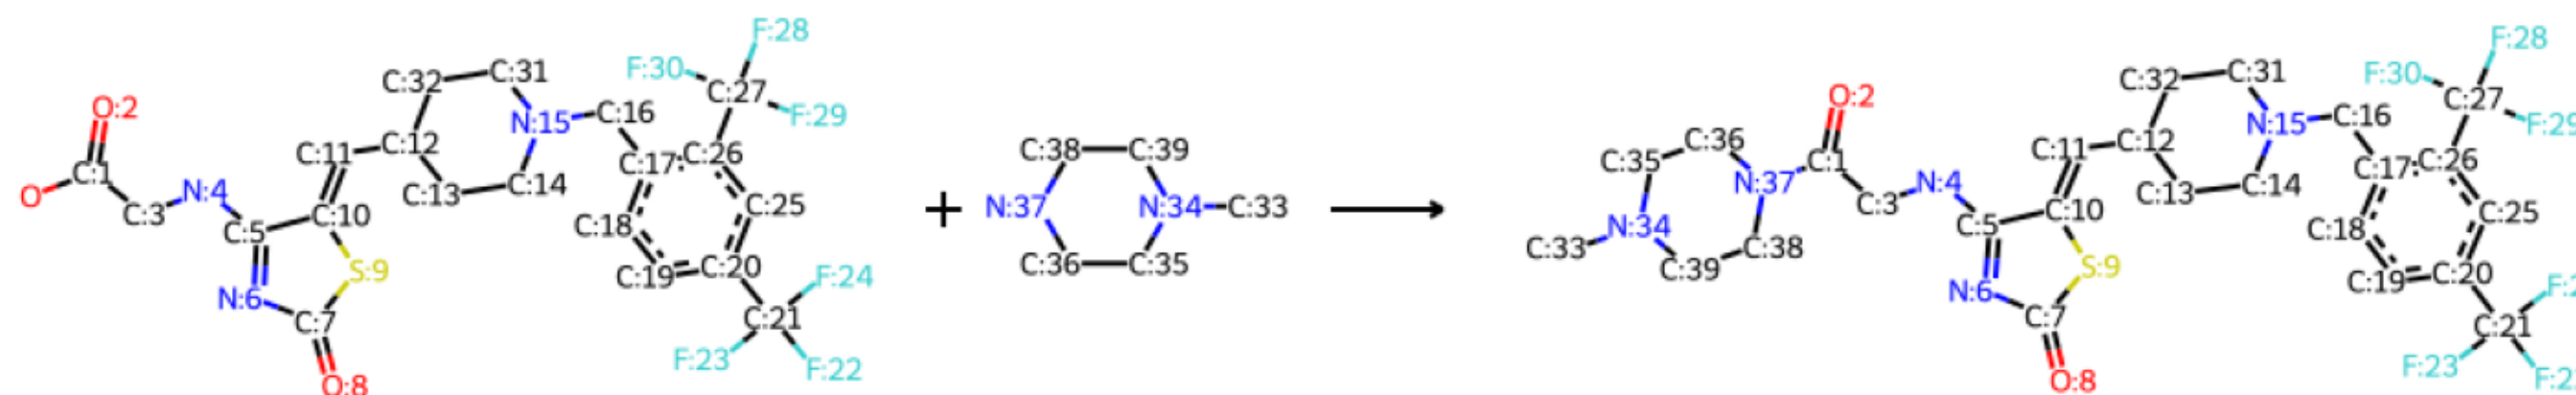

Identified mechanistic class -  
DCC\_condensation reaction

Reaction with missing reagents recovered

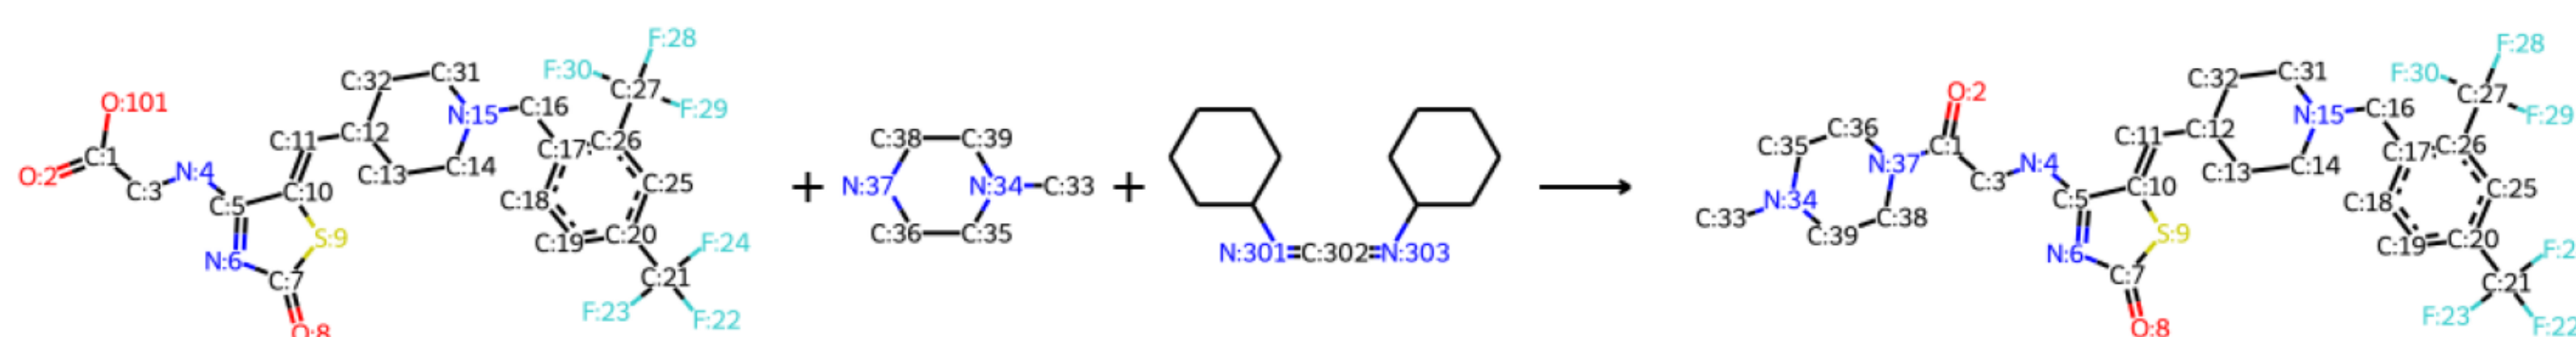

Proposed mechanistic pathway

[Arrow order: (1) green, (2) blue, (3) red, (4) orange]

step #1

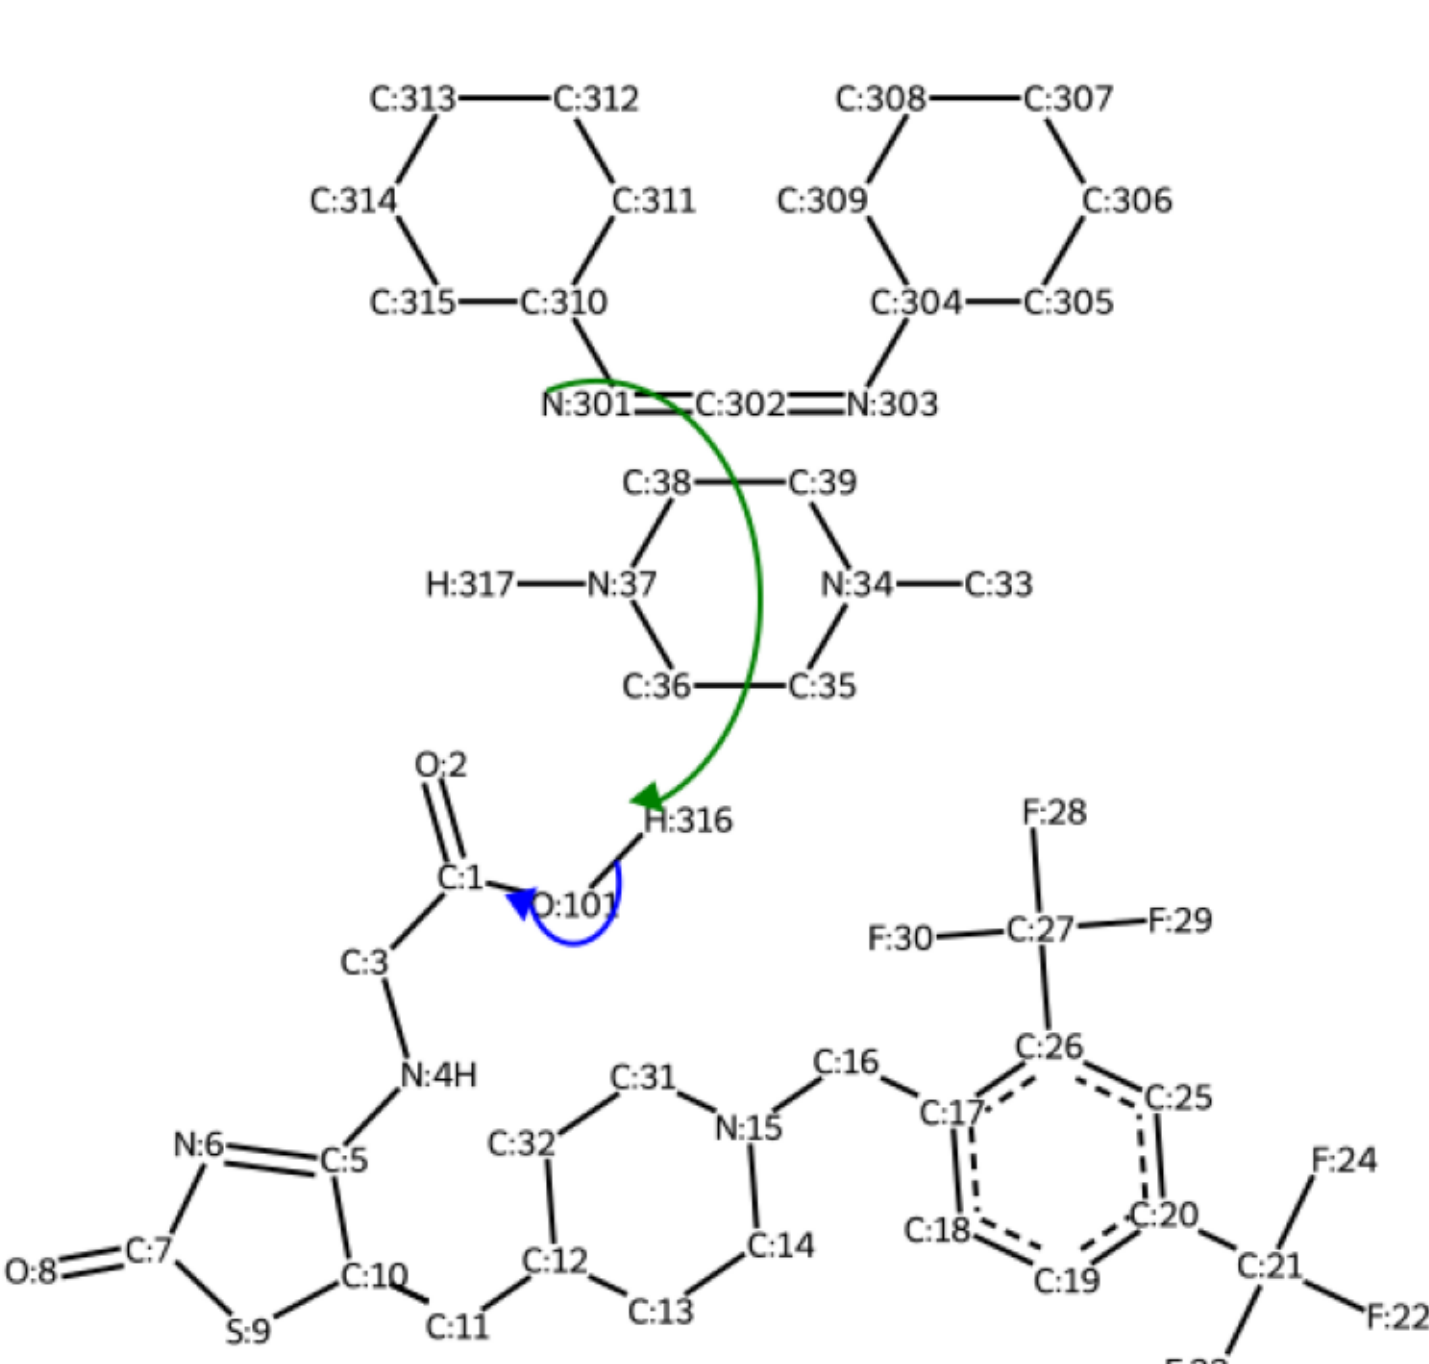

step #2

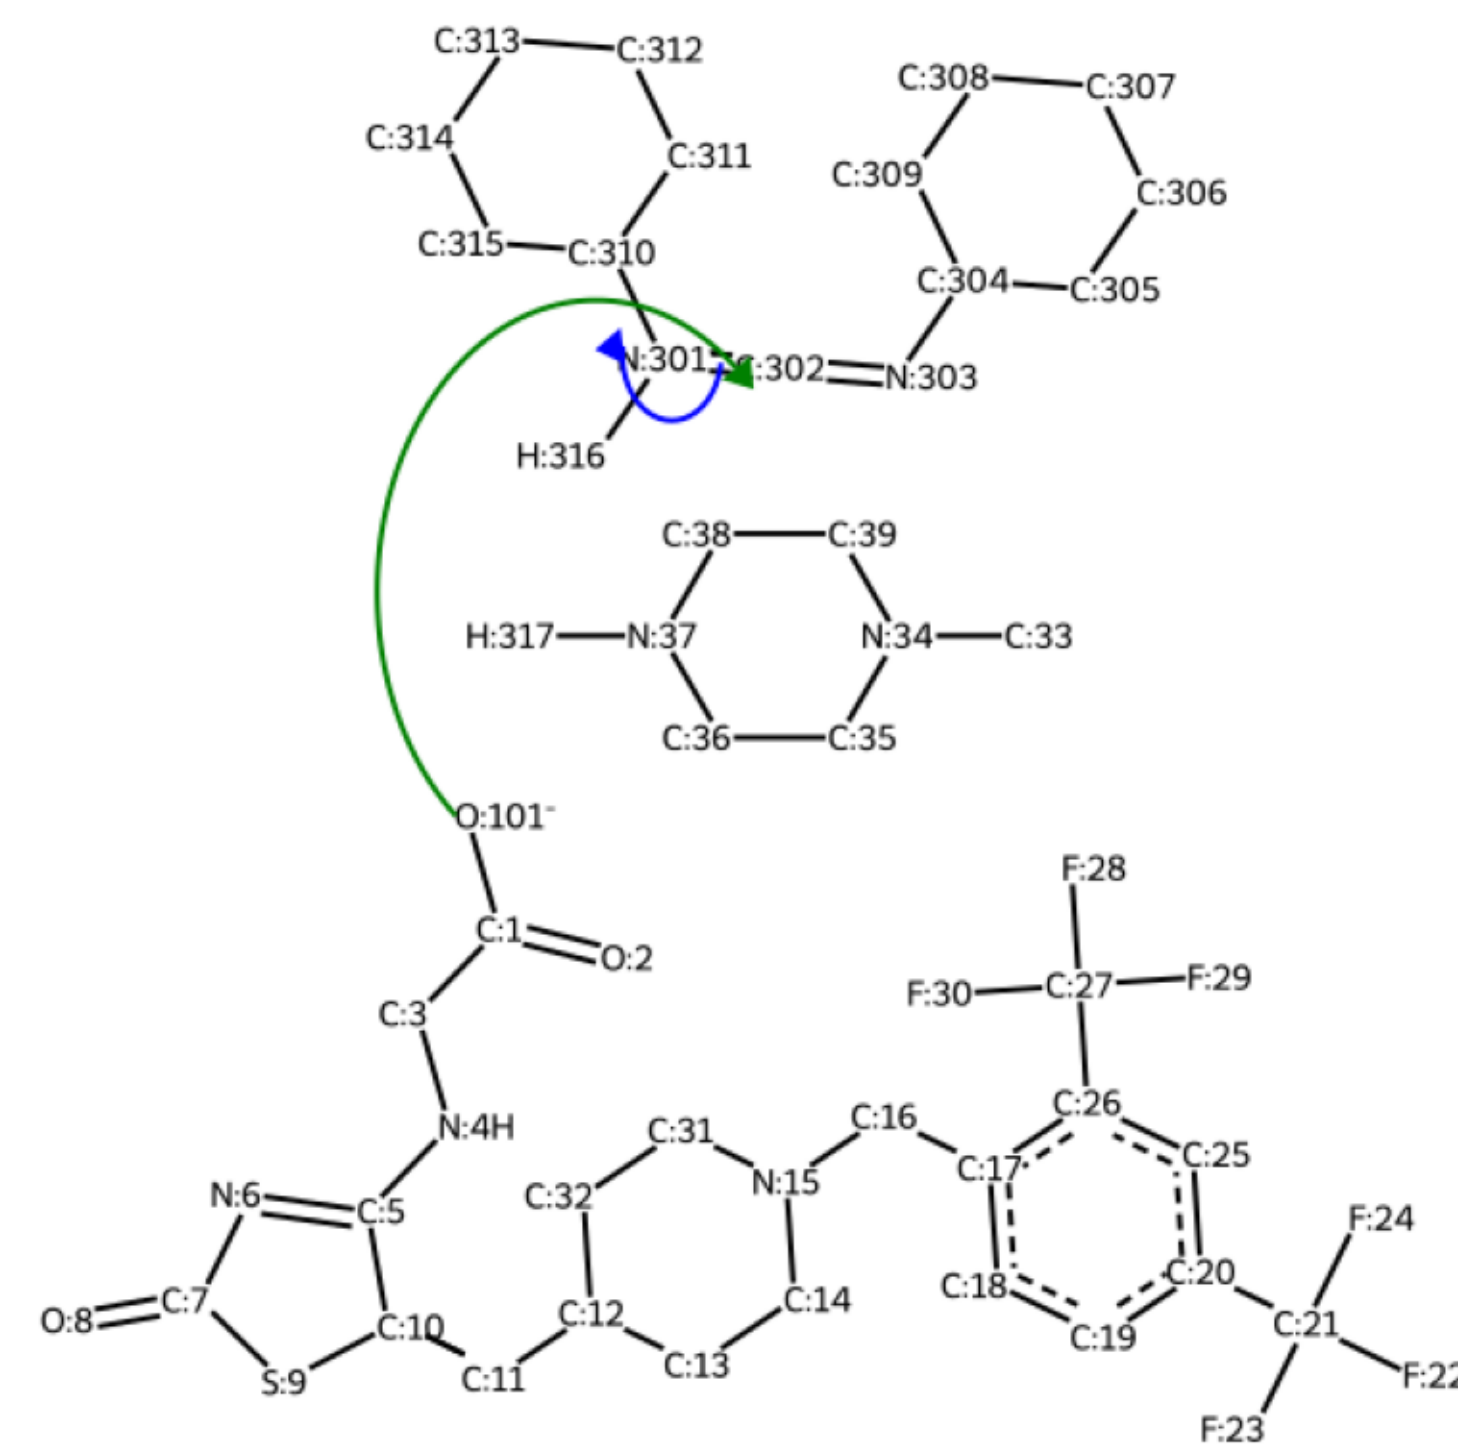

step #3

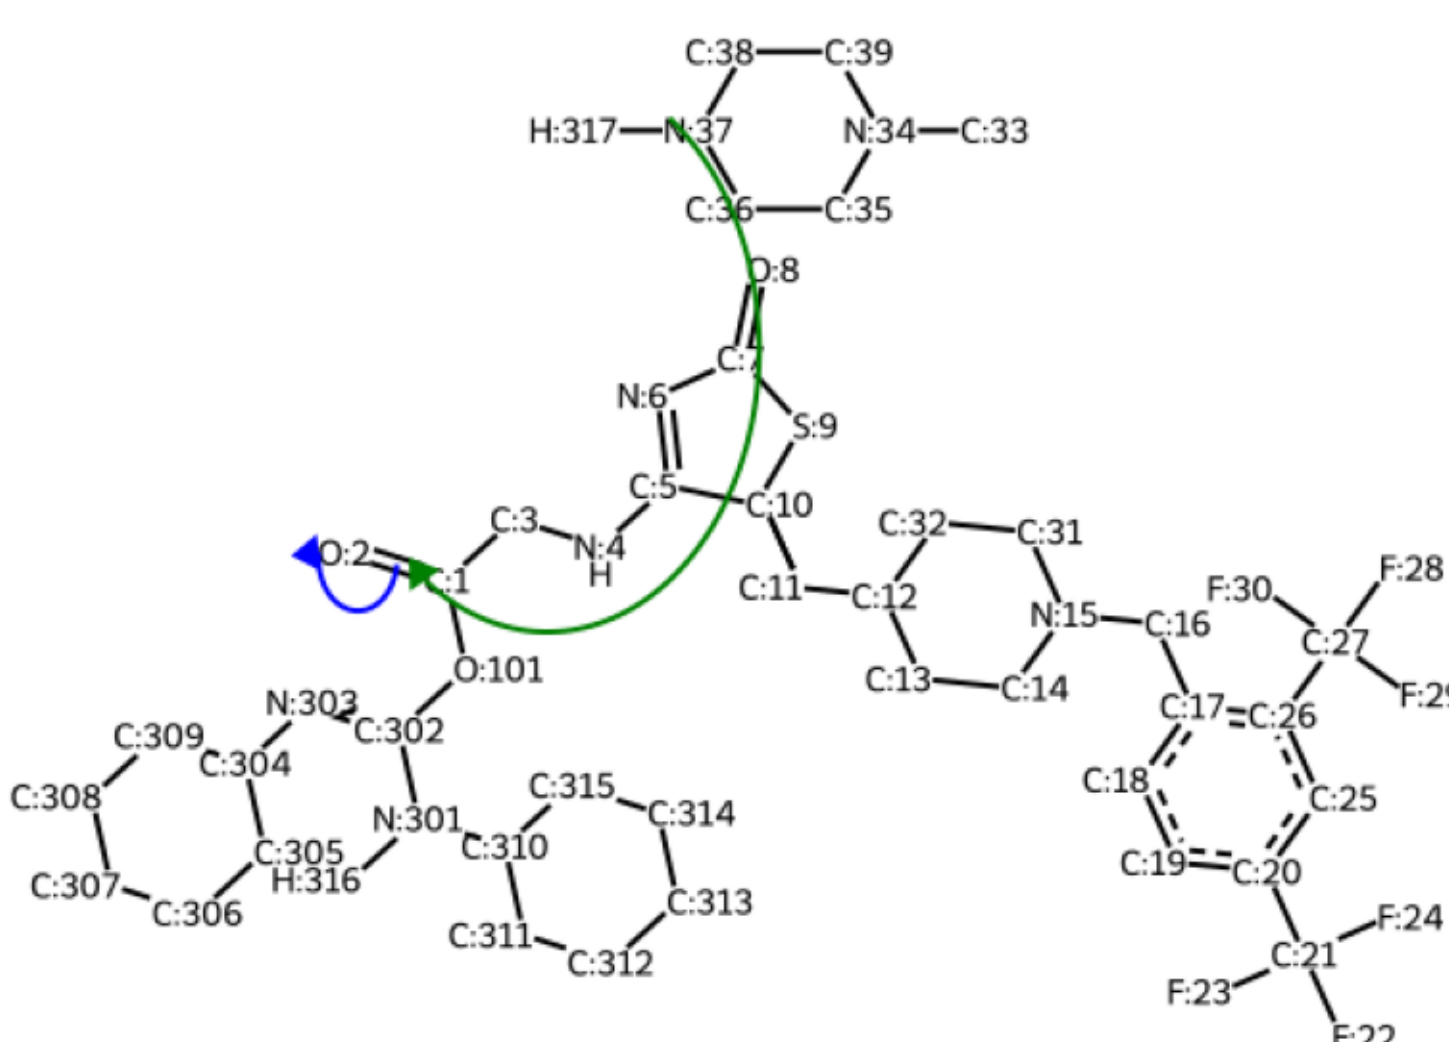

step #4

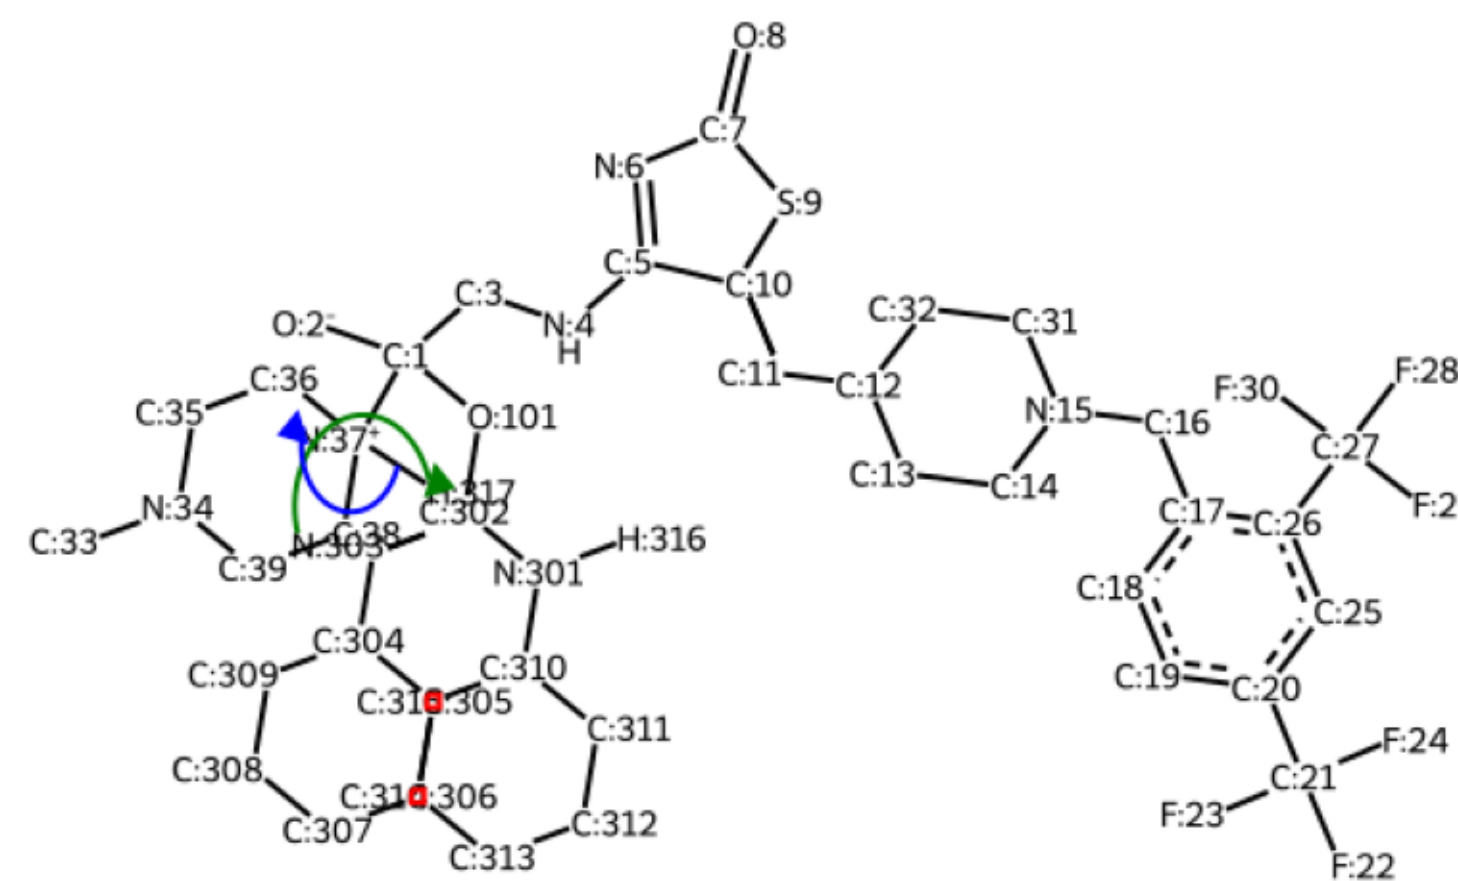

step #5

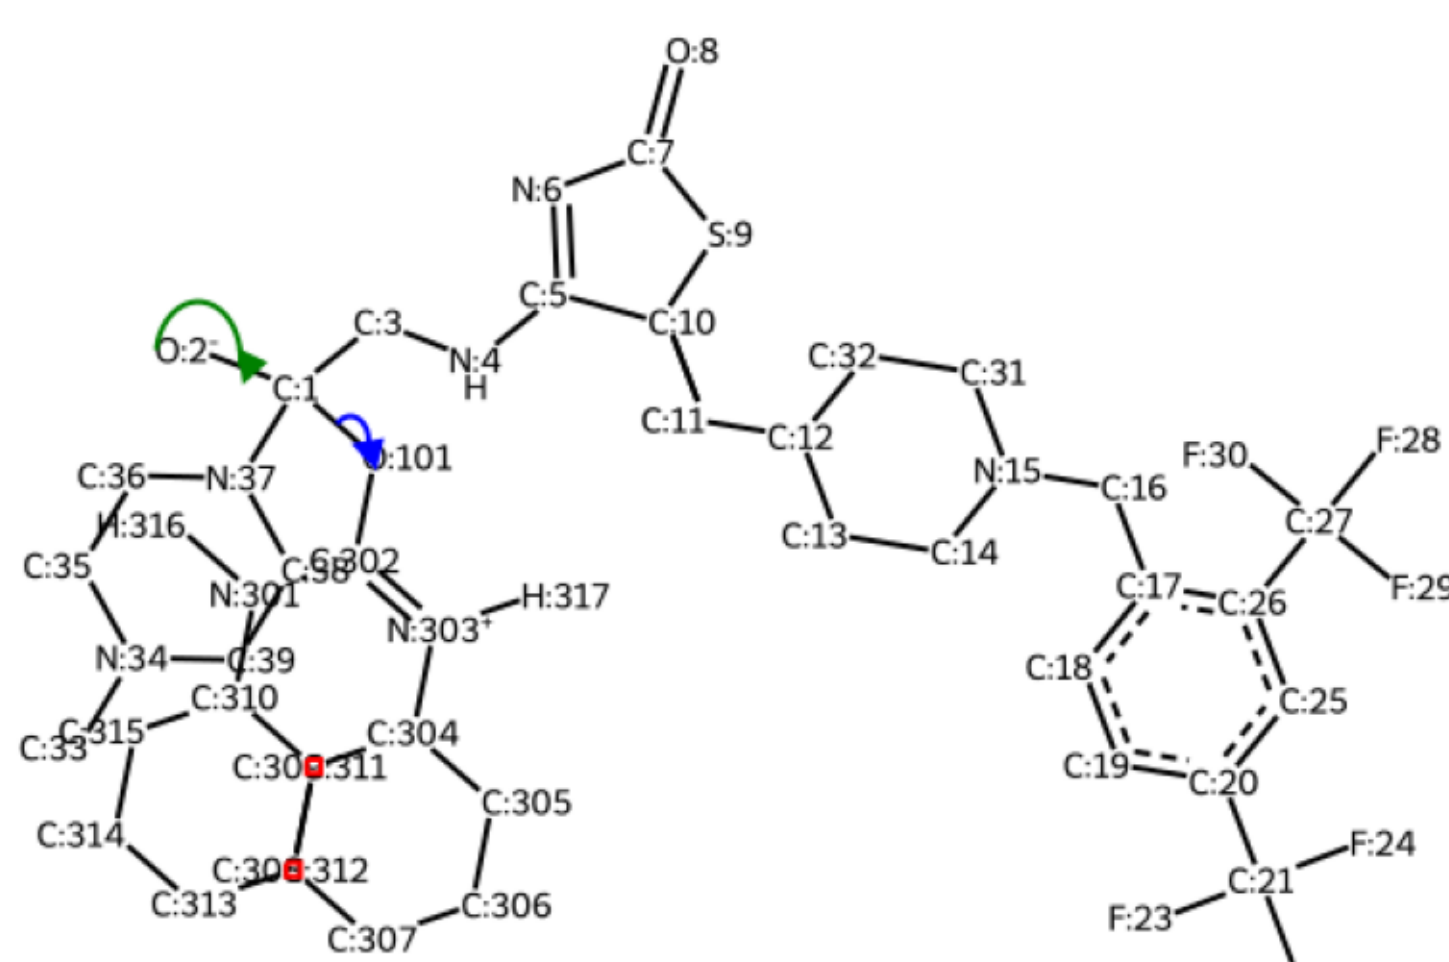

step #6

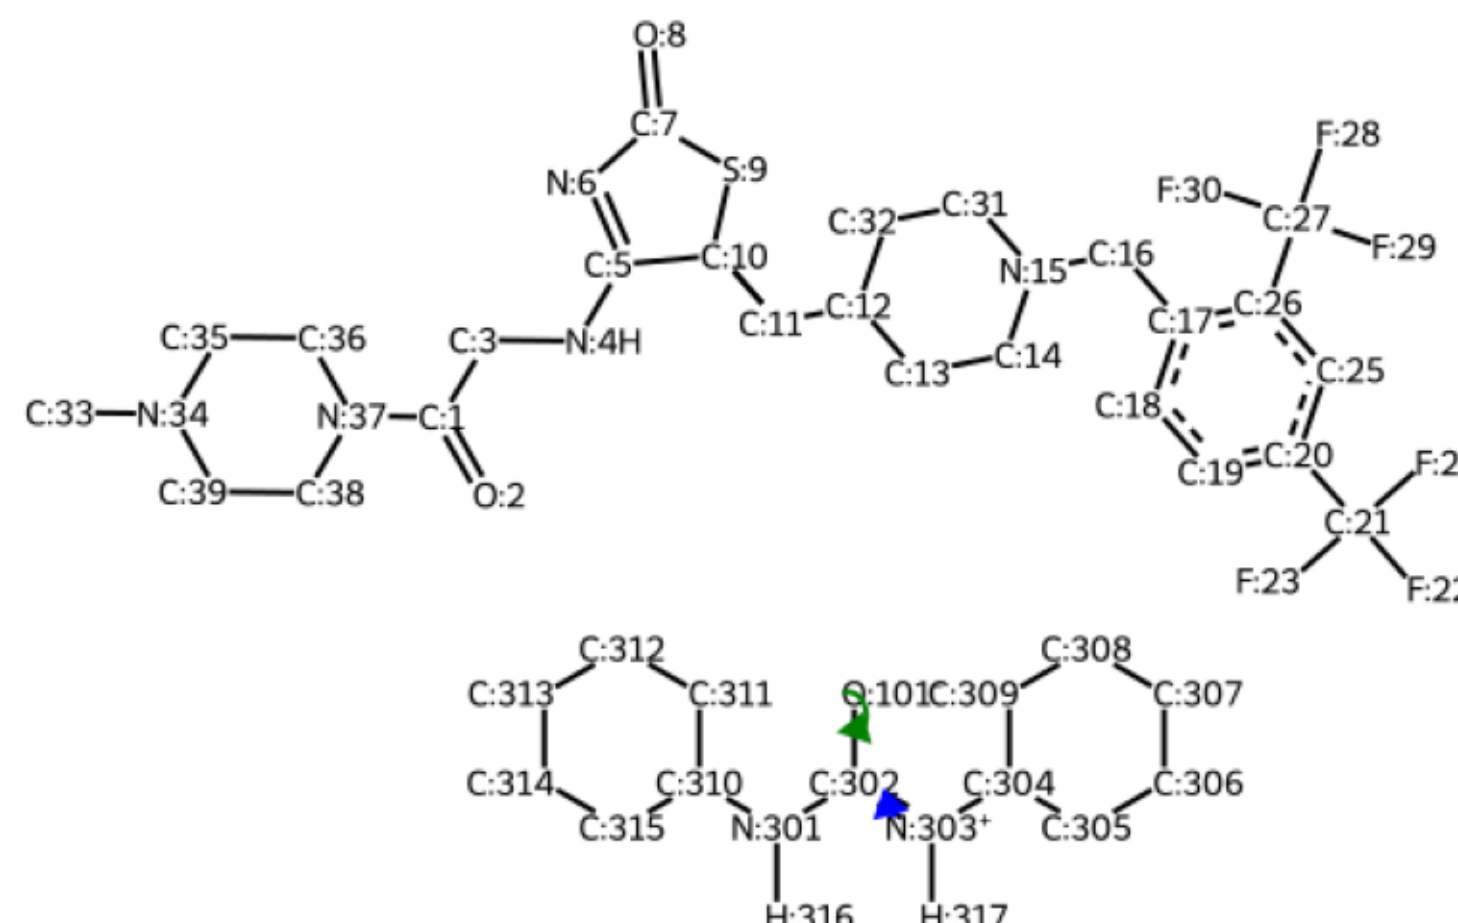

Product(s)

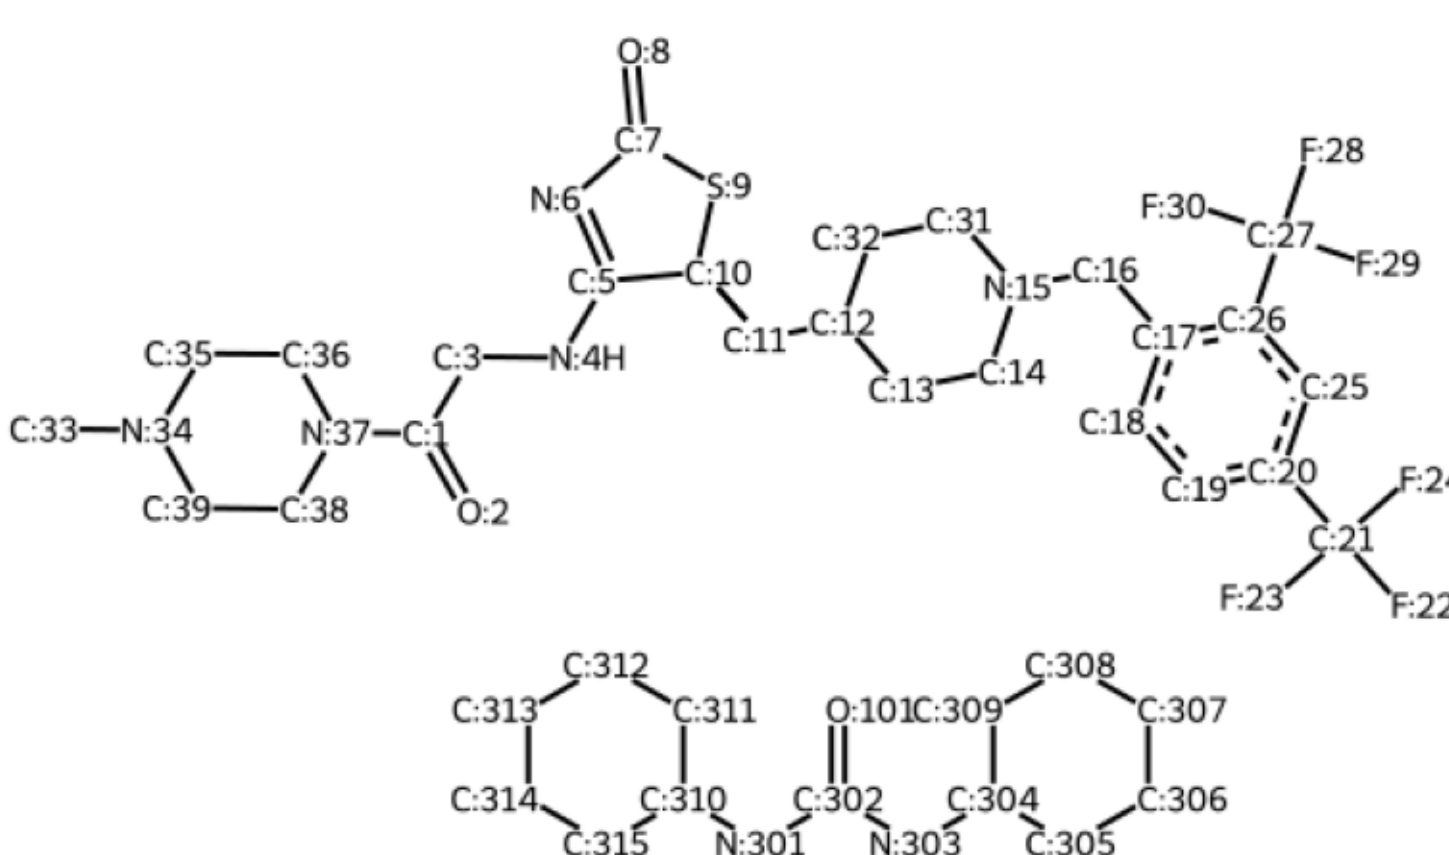



# Original reaction sampled RXN\_ID:6)

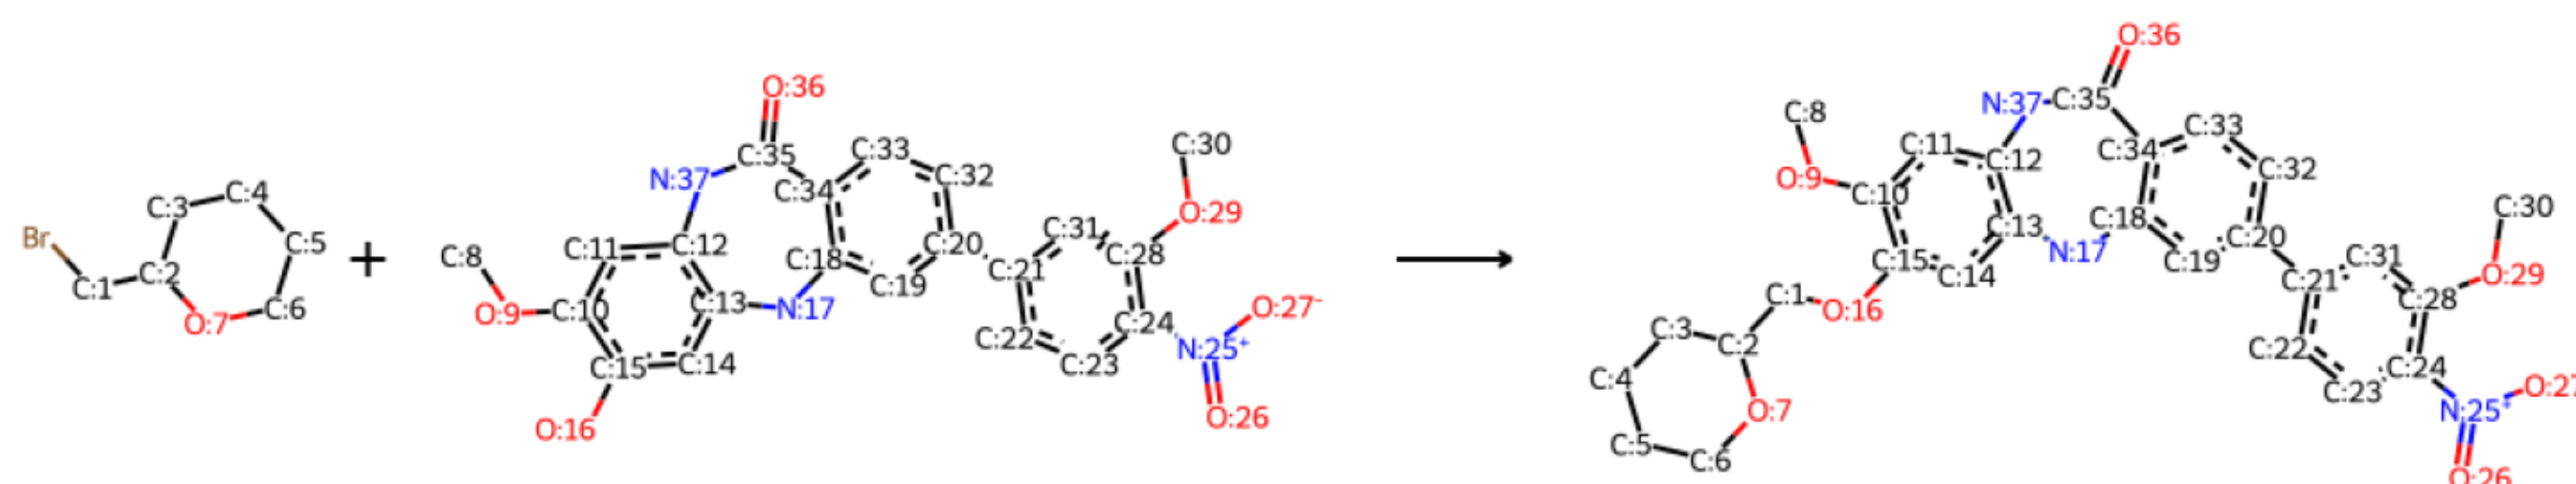

Identified mechanistic class -  
SN<sub>2</sub>alcohol(thiol) reaction

Reaction with missing reagents recovered

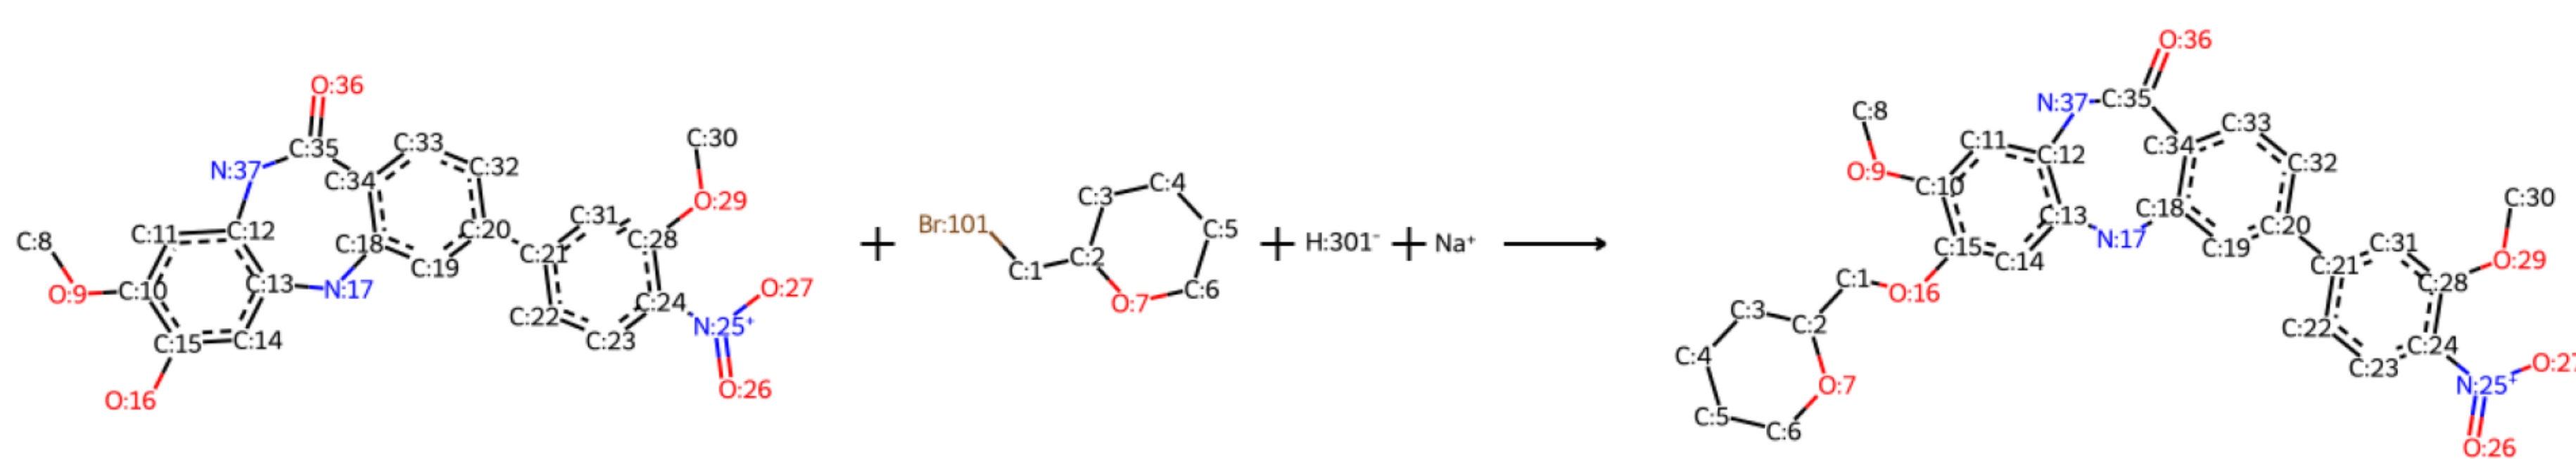

Proposed mechanistic pathway

[Arrow order: (1) green, (2) blue, (3) red, (4) orange]

step #1

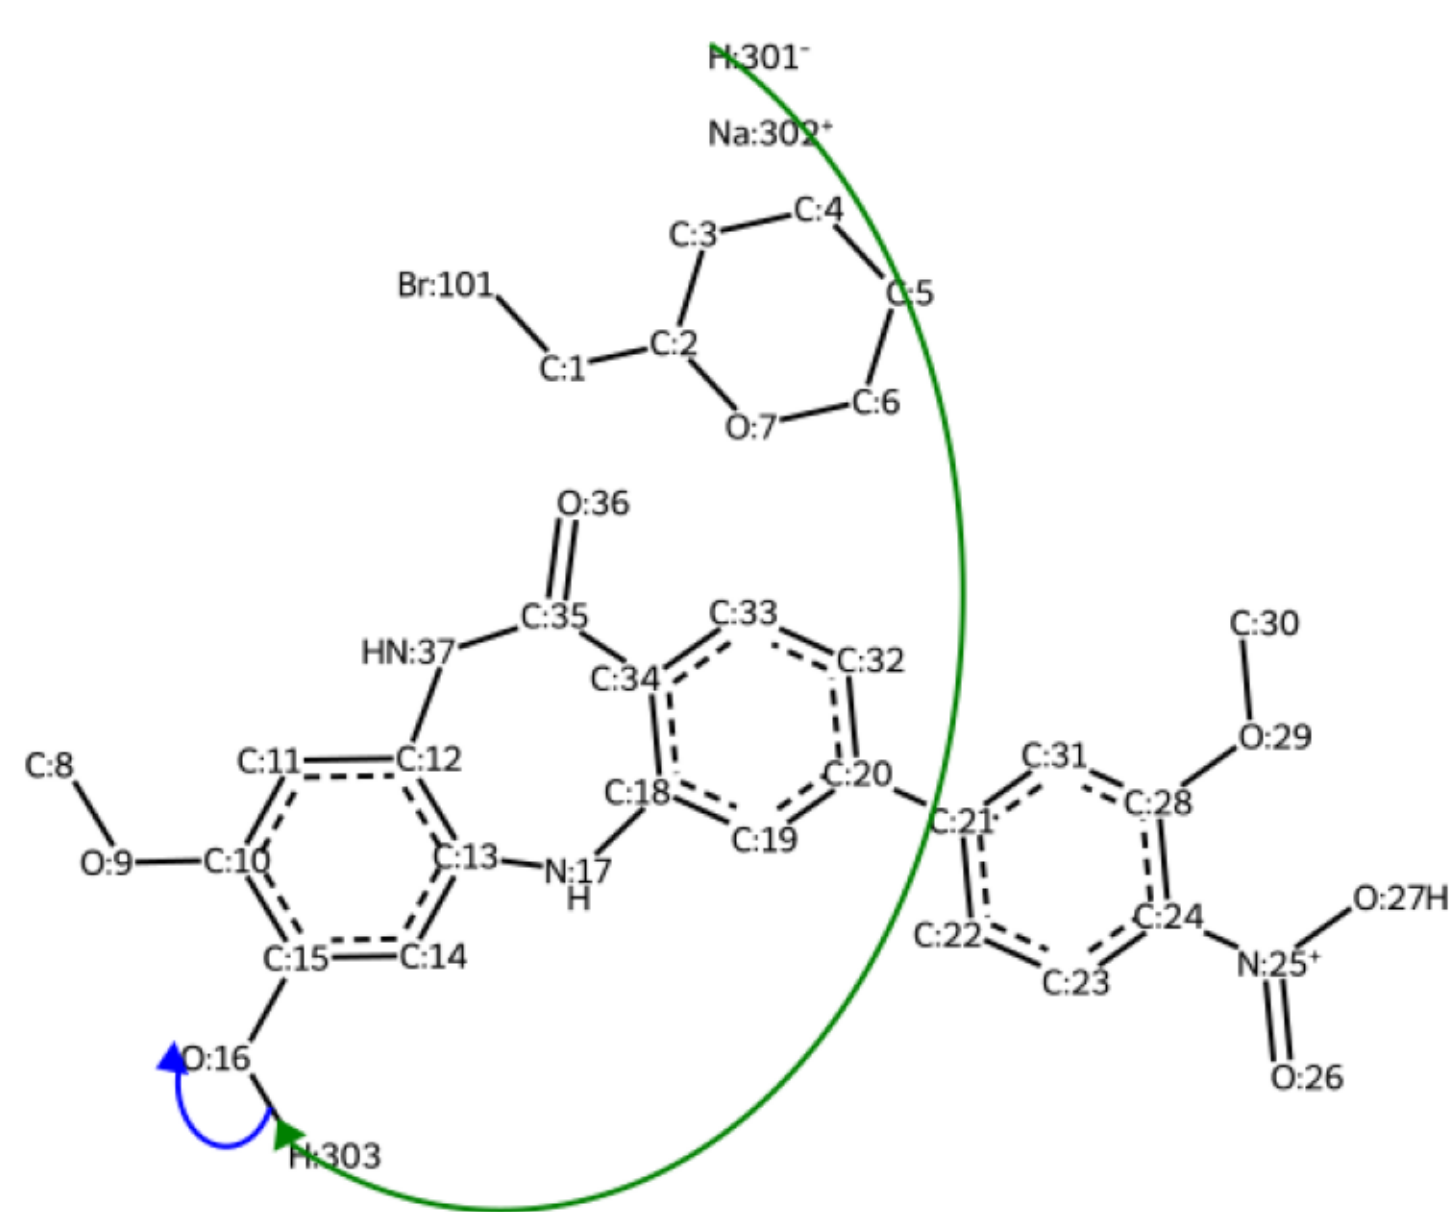

step #2

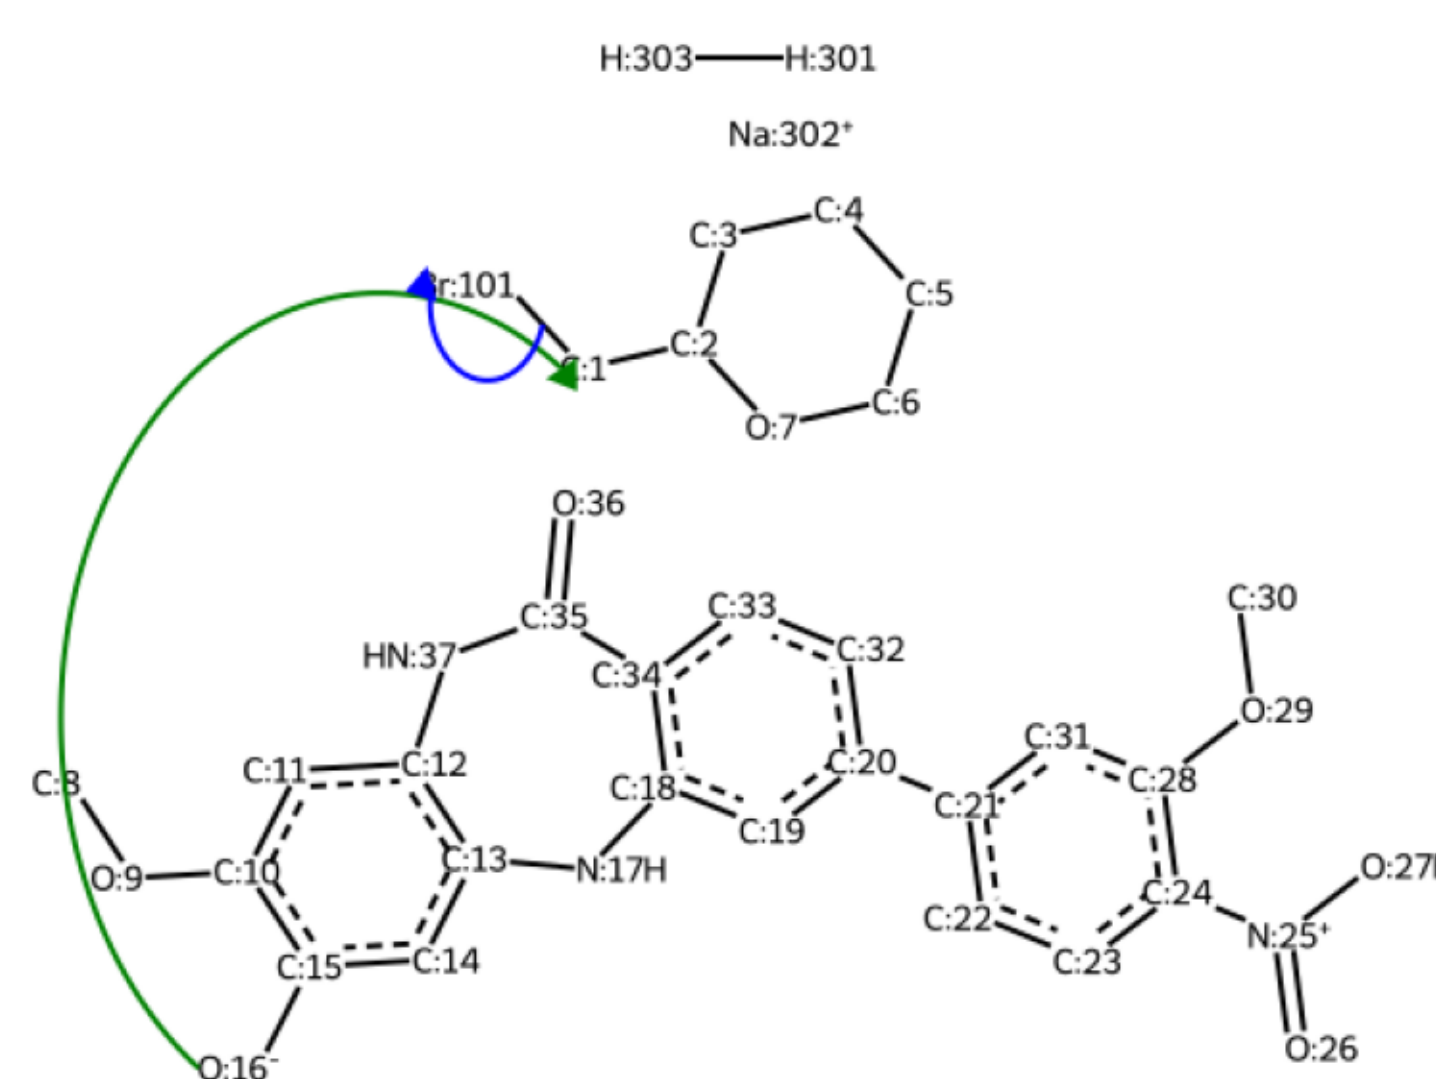

Product(s)

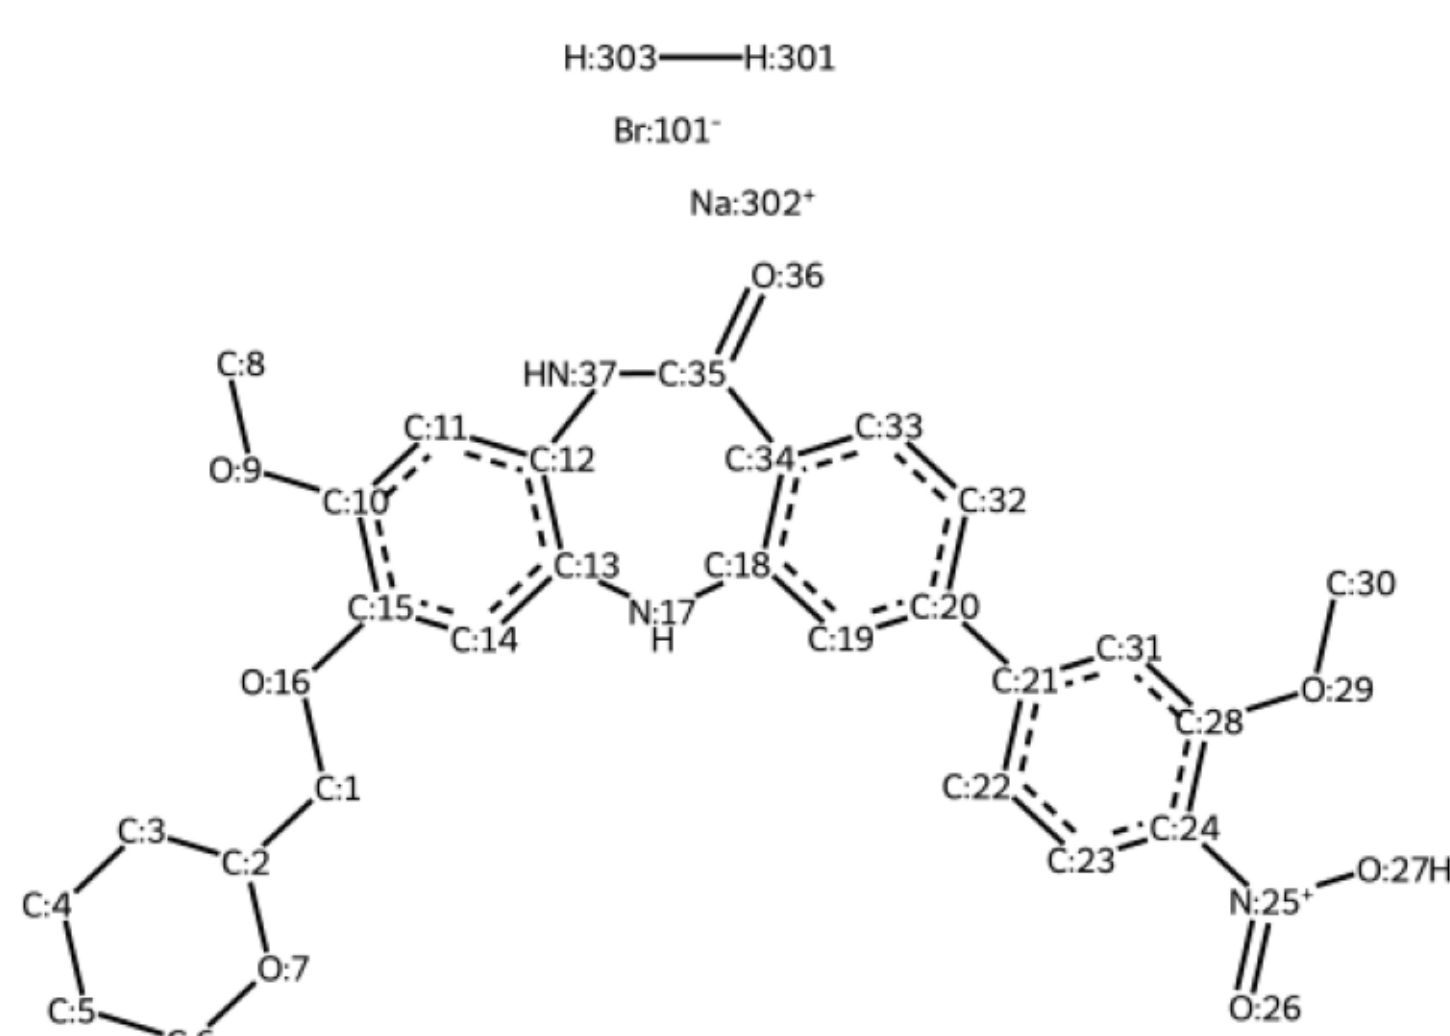





Original reaction  
sampled RXN\_ID:8)

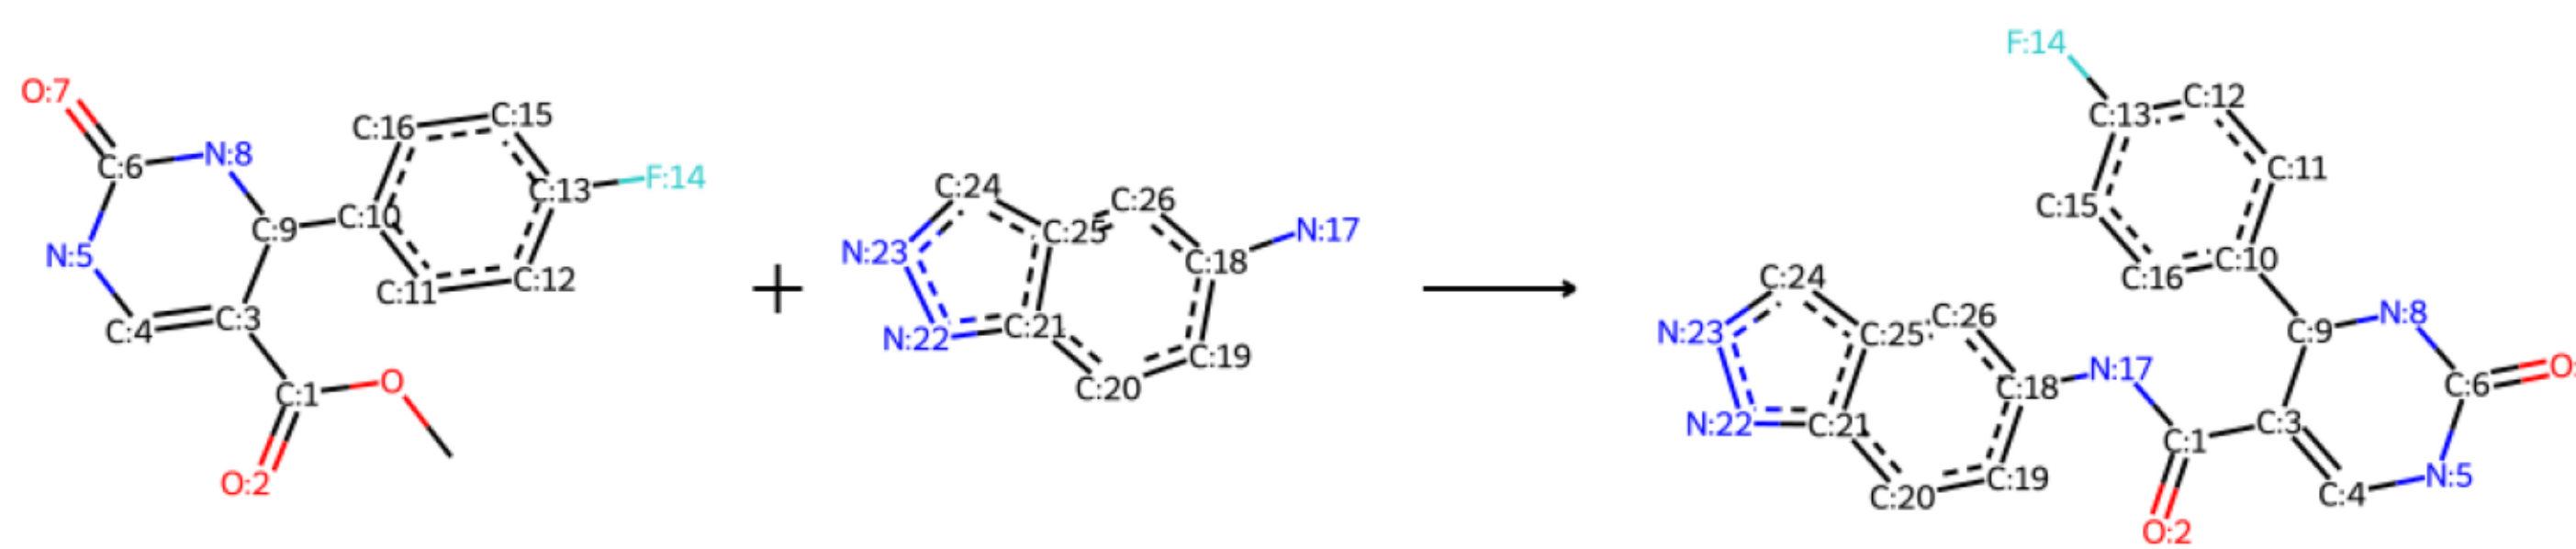

Identified mechanistic class -  
nucleophilic\_attack\_to\_(thio)carbonyl\_or\_sulfonyl reaction

Reaction with missing reagents recovered

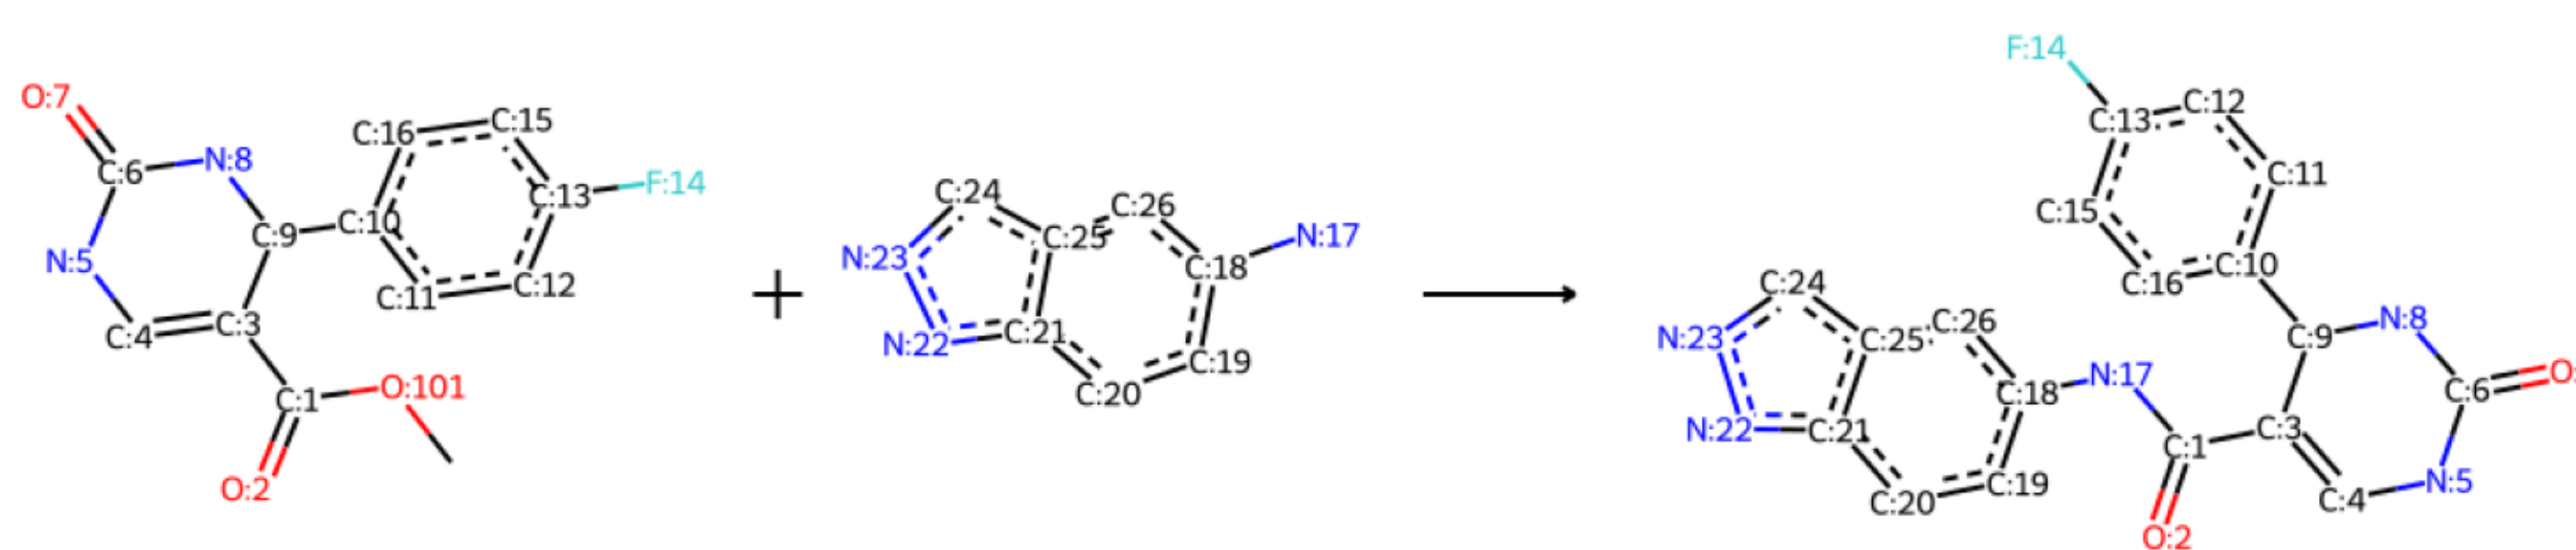

Proposed mechanistic pathway

[Arrow order: (1) green, (2) blue, (3) red, (4) orange]

step #1

step #2

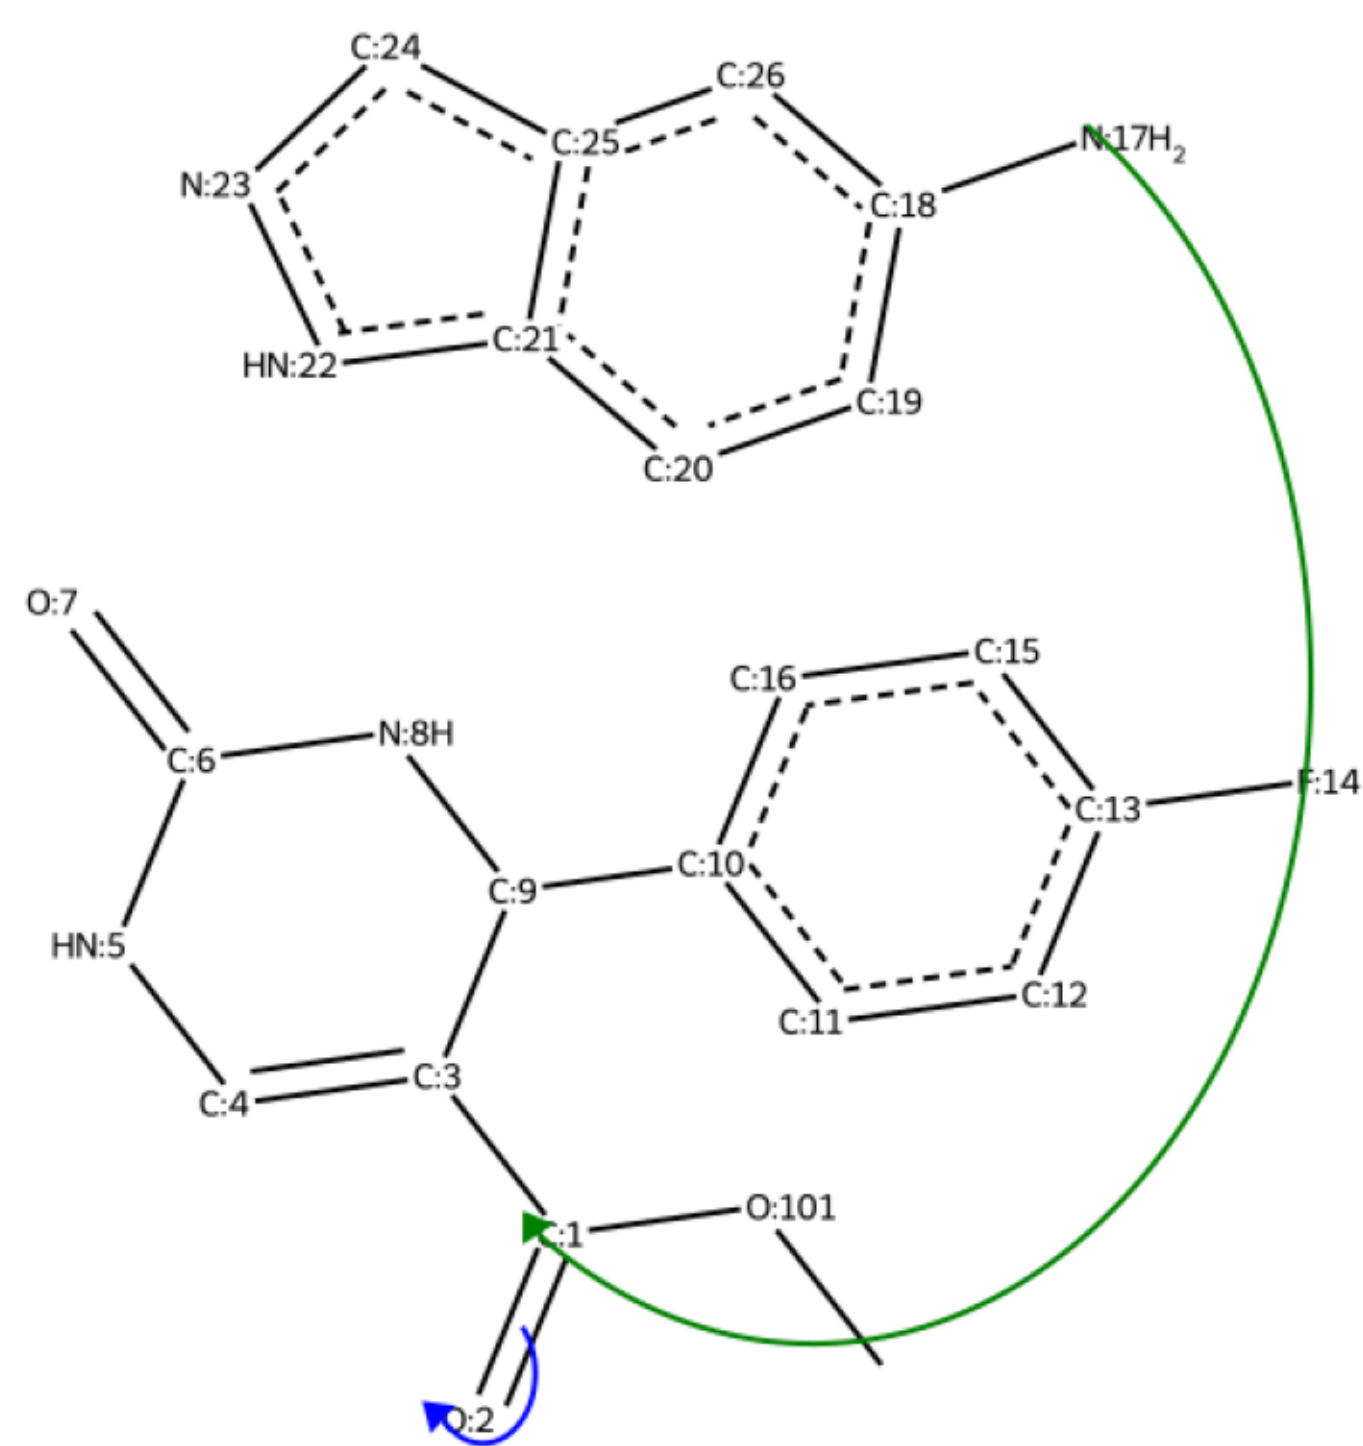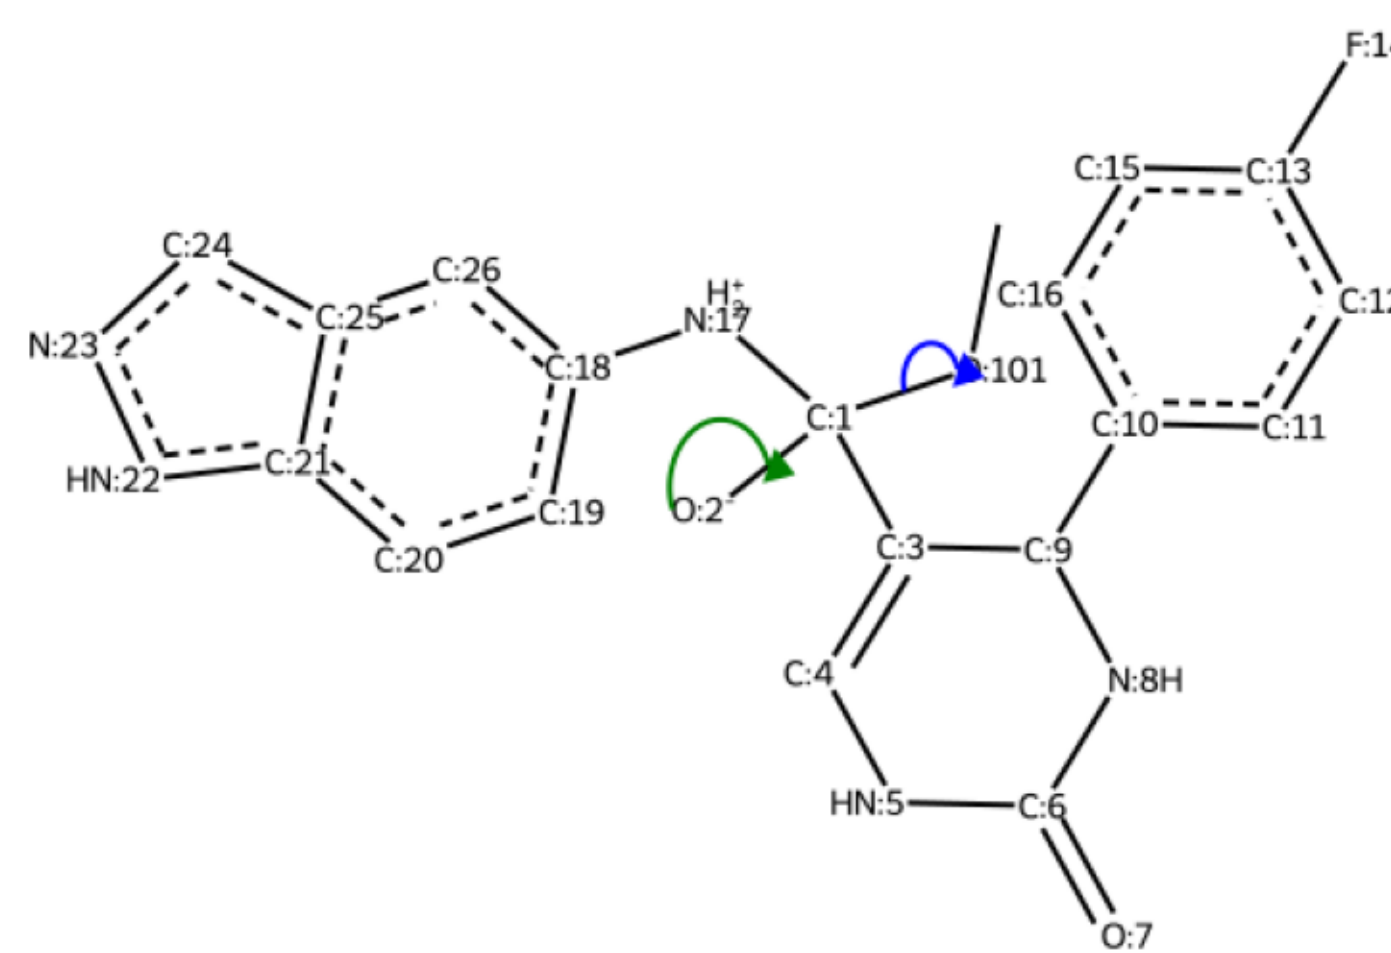

Product(s)

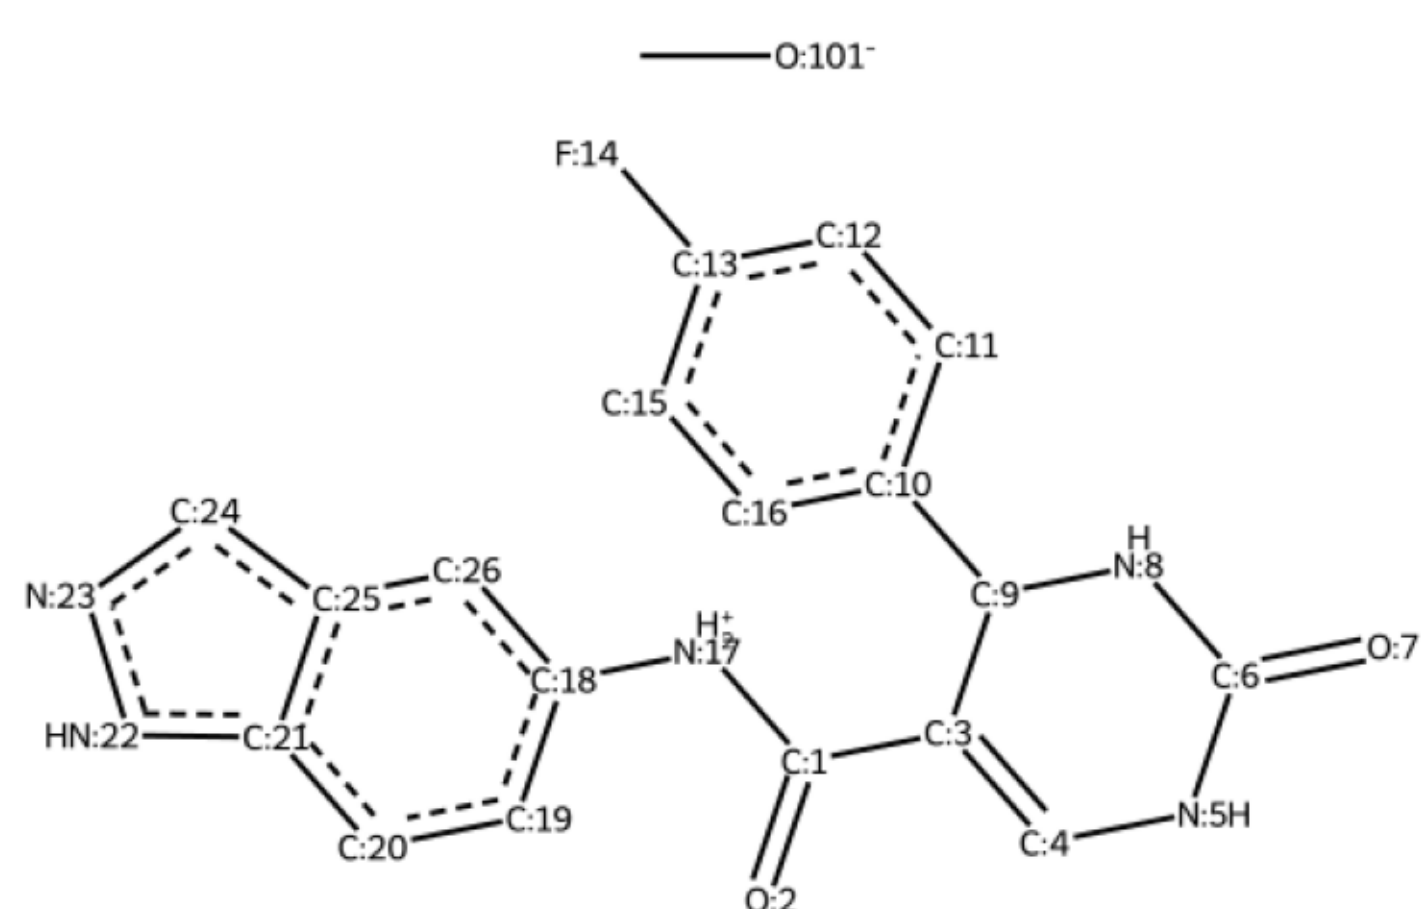

proton transfer

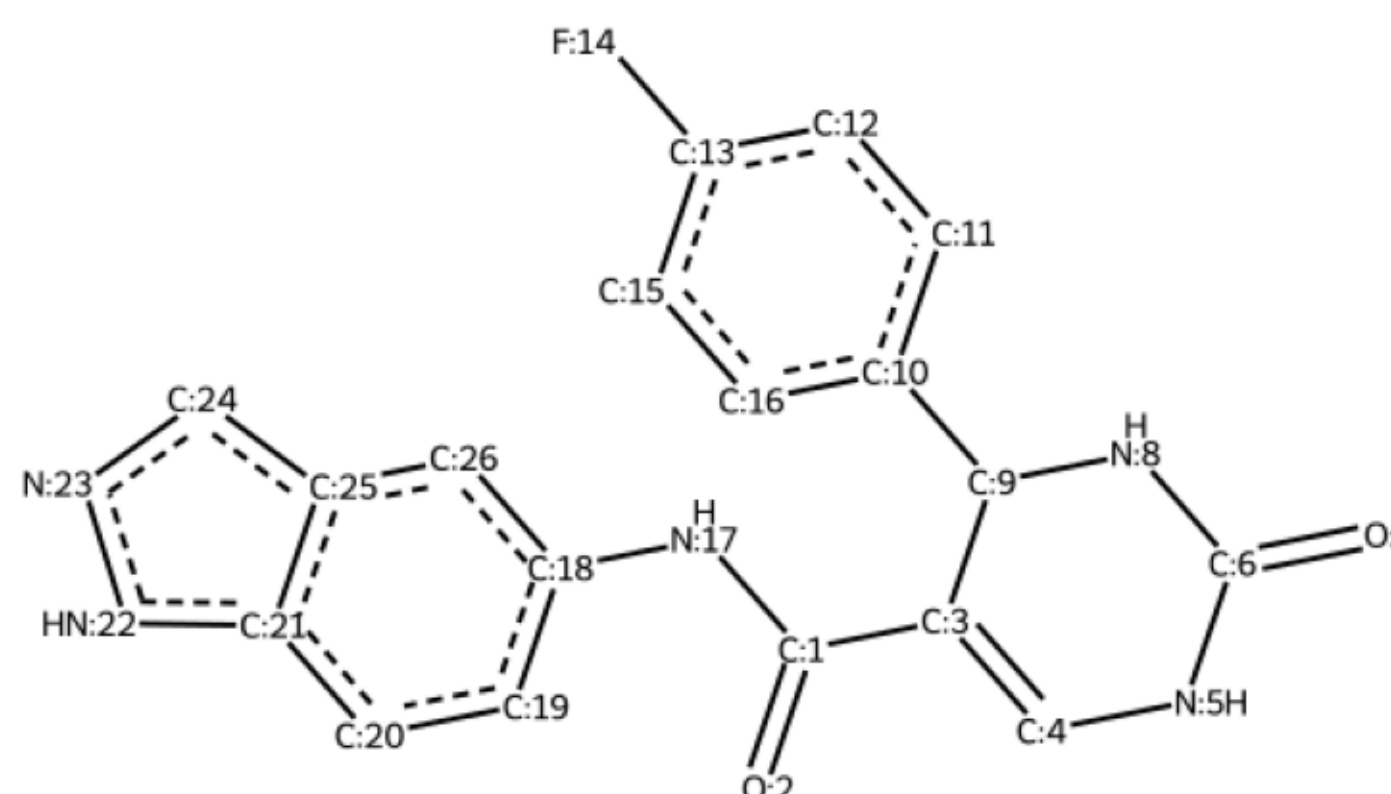



Original reaction  
sampled RXN\_ID:9)

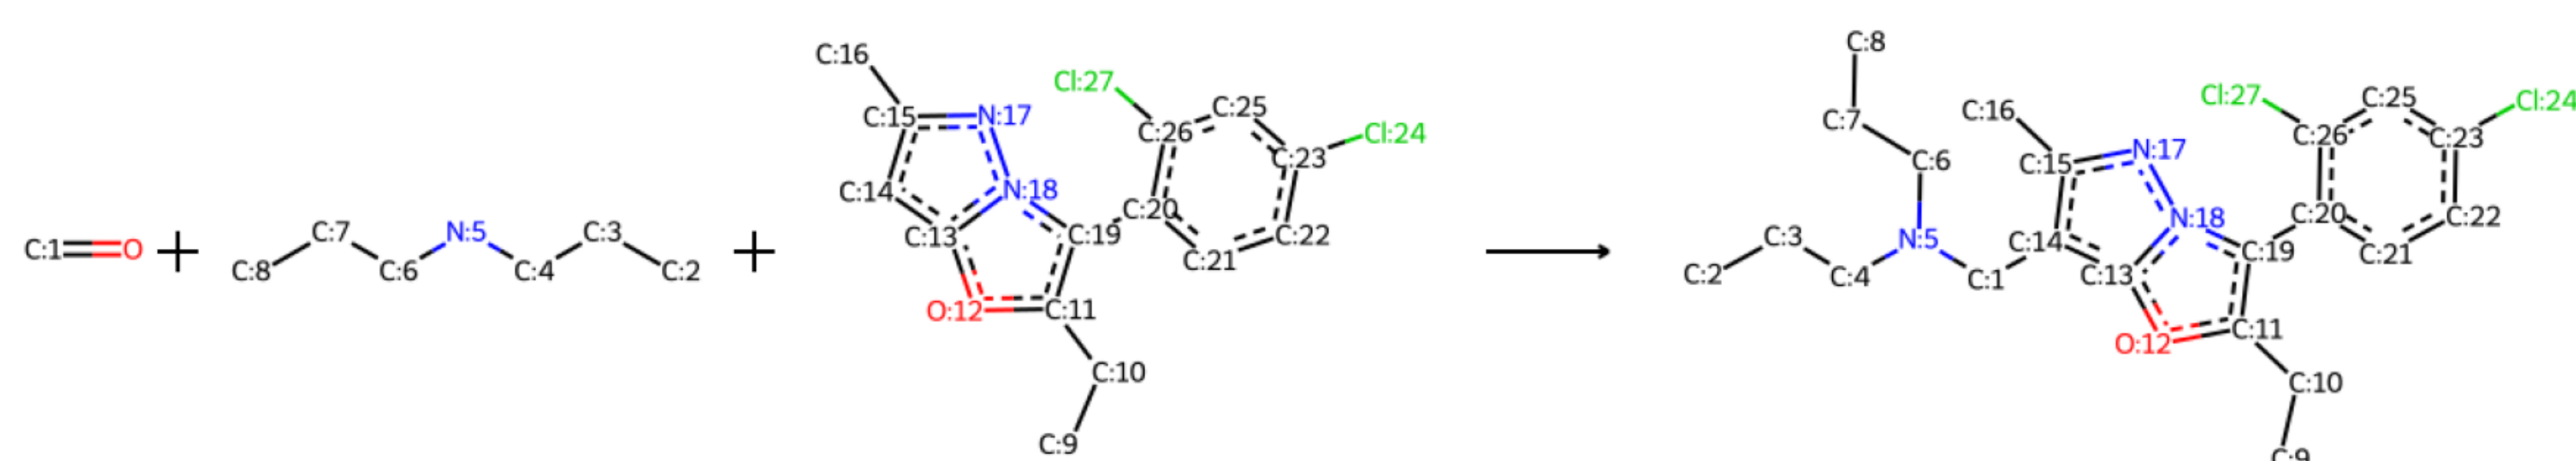

Identified mechanistic class -  
Mannich reaction

Reaction with missing reagents recovered

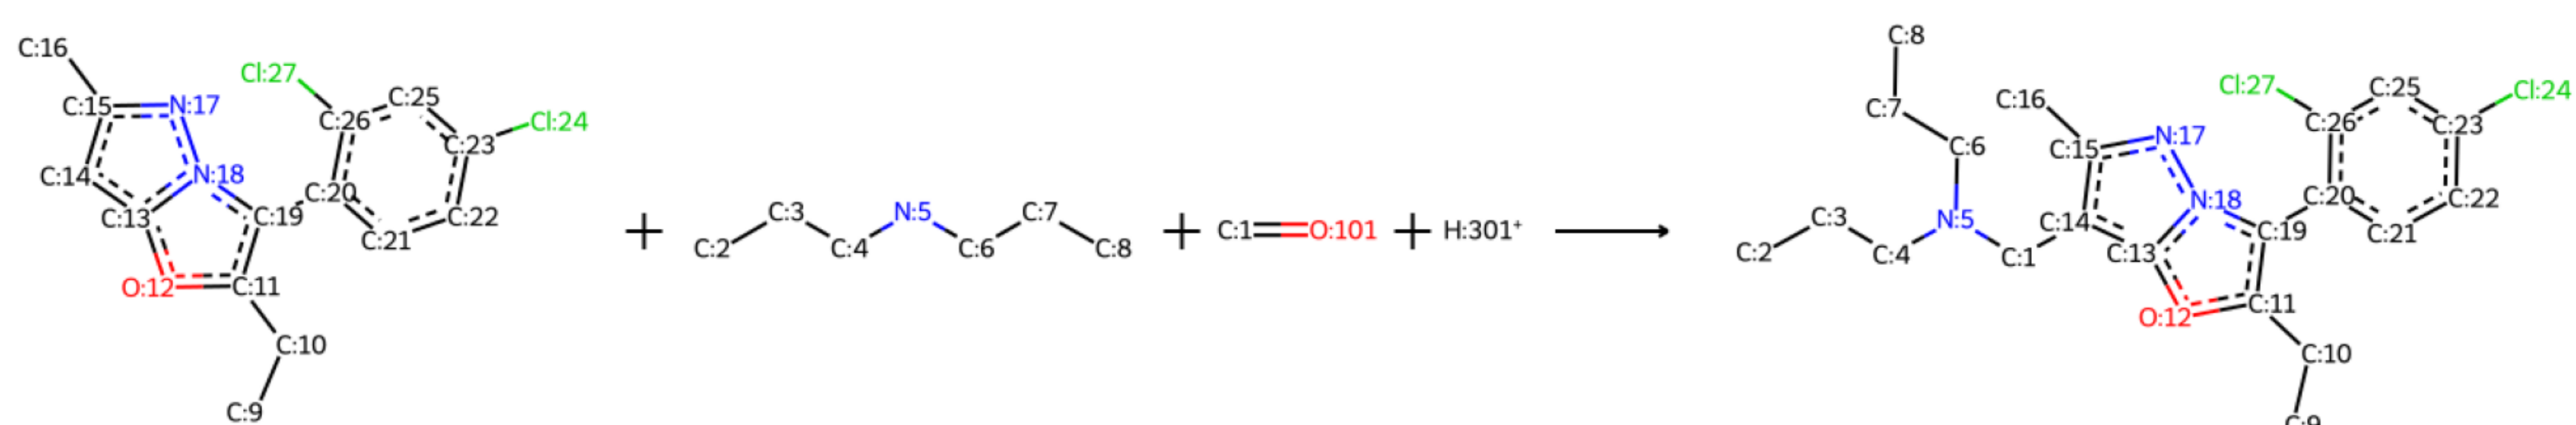

Proposed mechanistic pathway

[Arrow order: (1) green, (2) blue, (3) red, (4) orange]

step #1

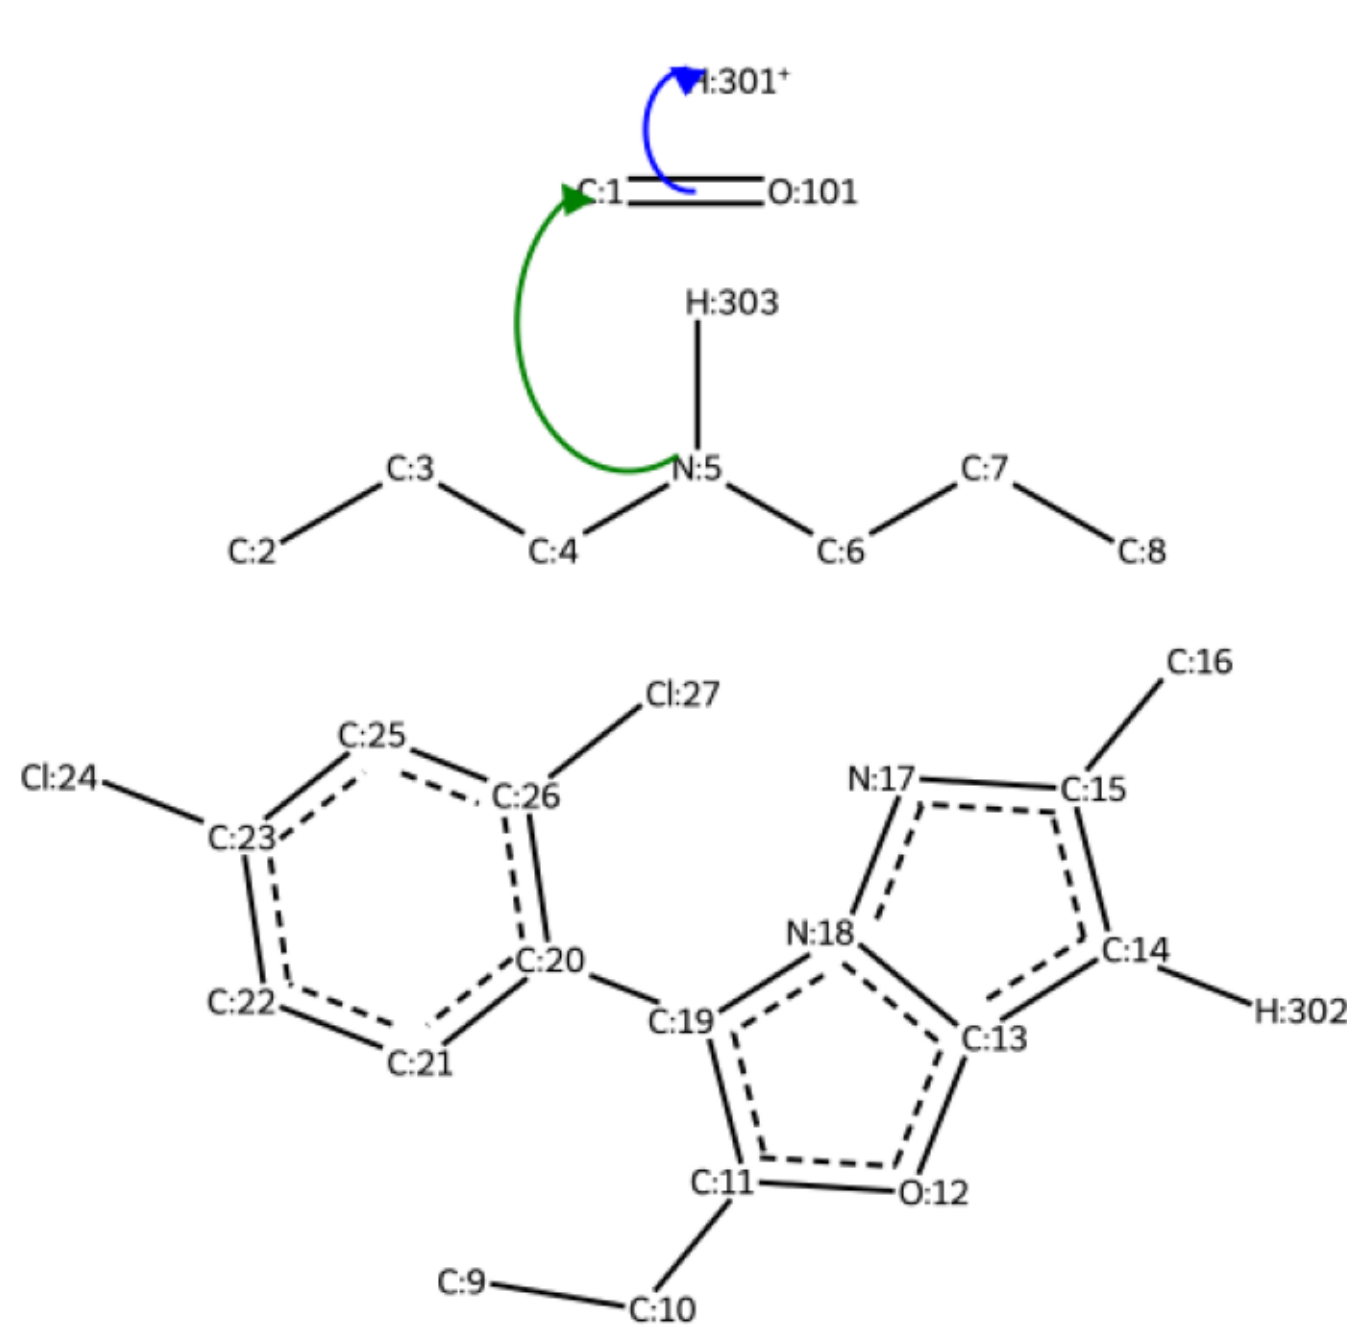

step #2

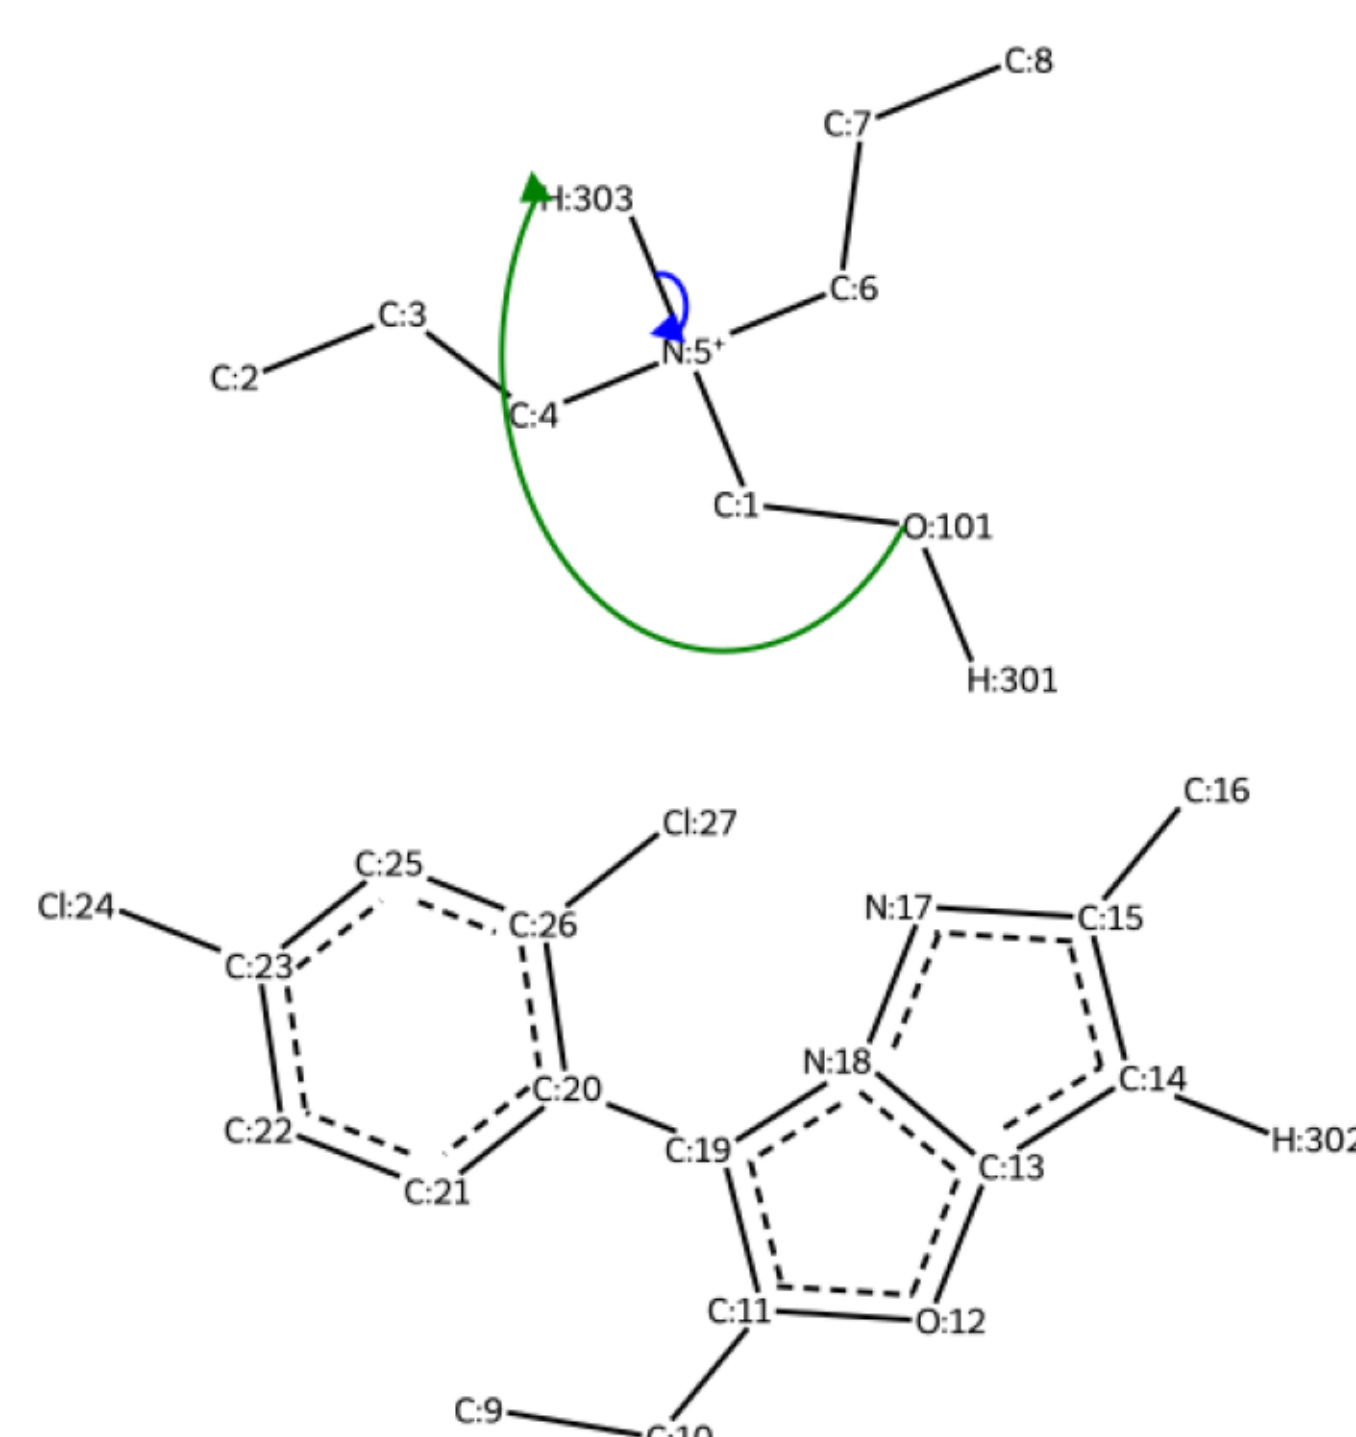

step #3

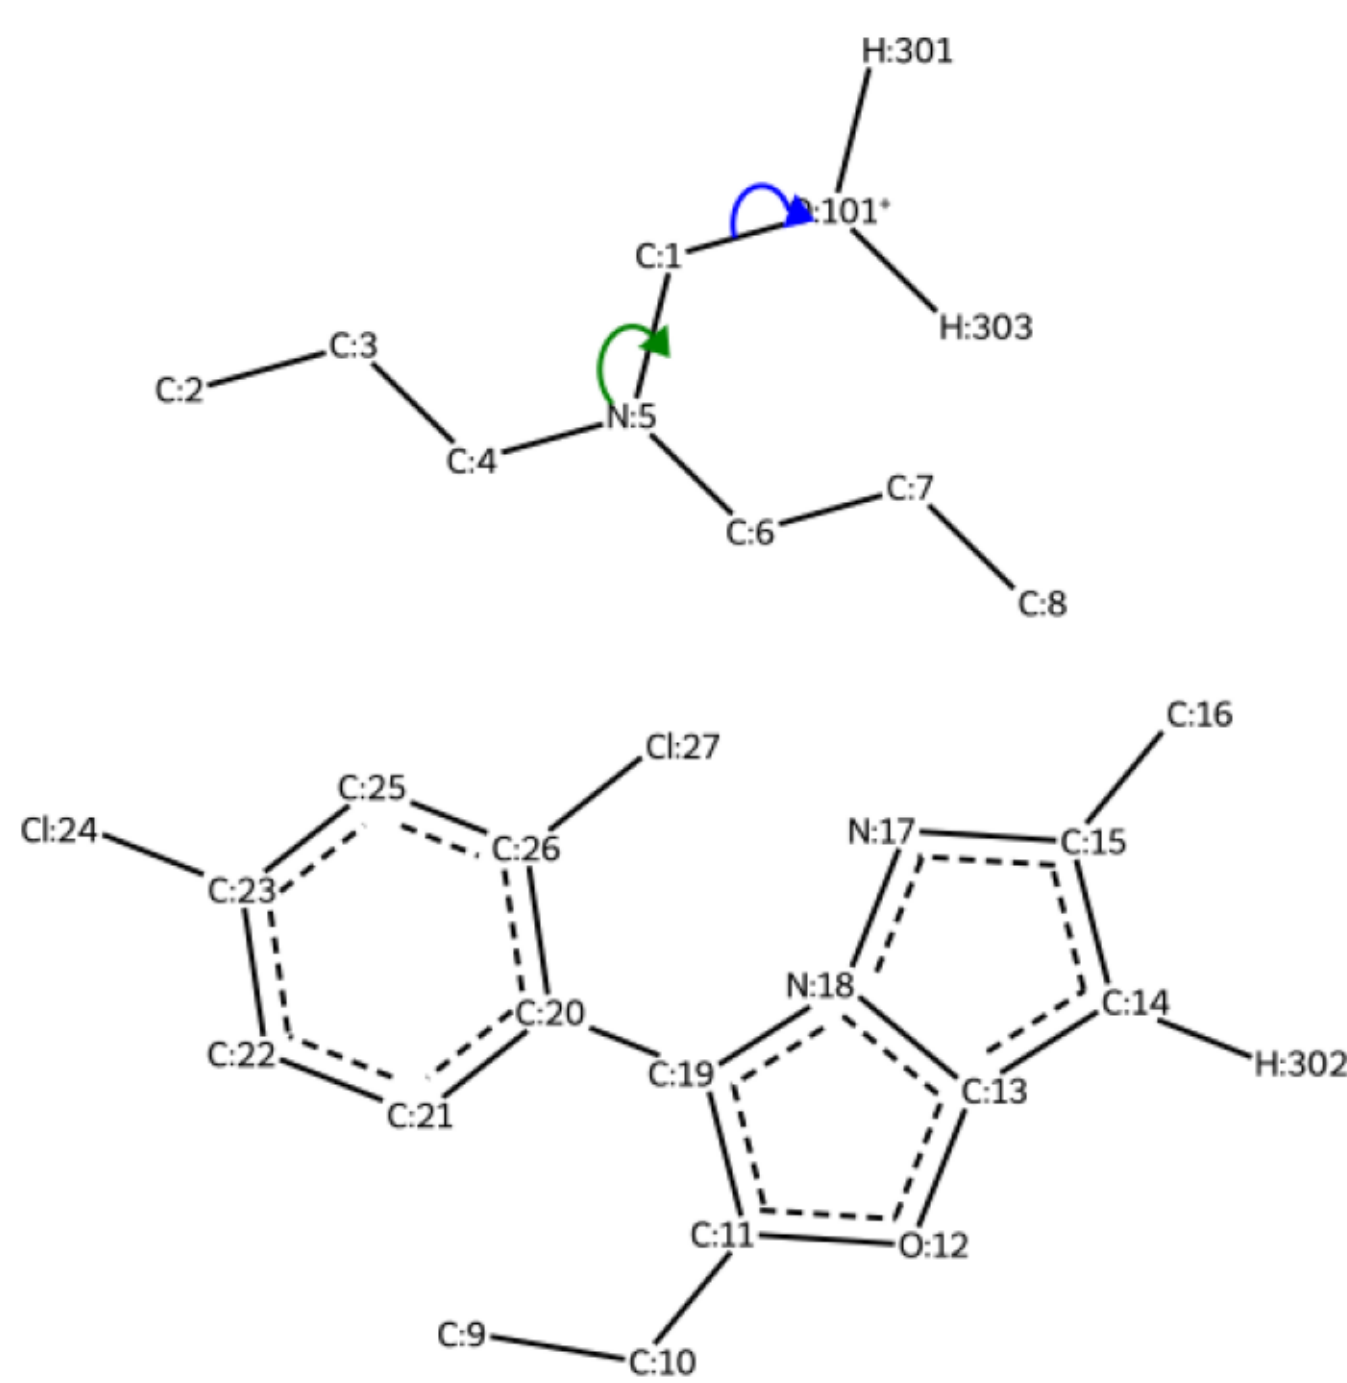

step #4

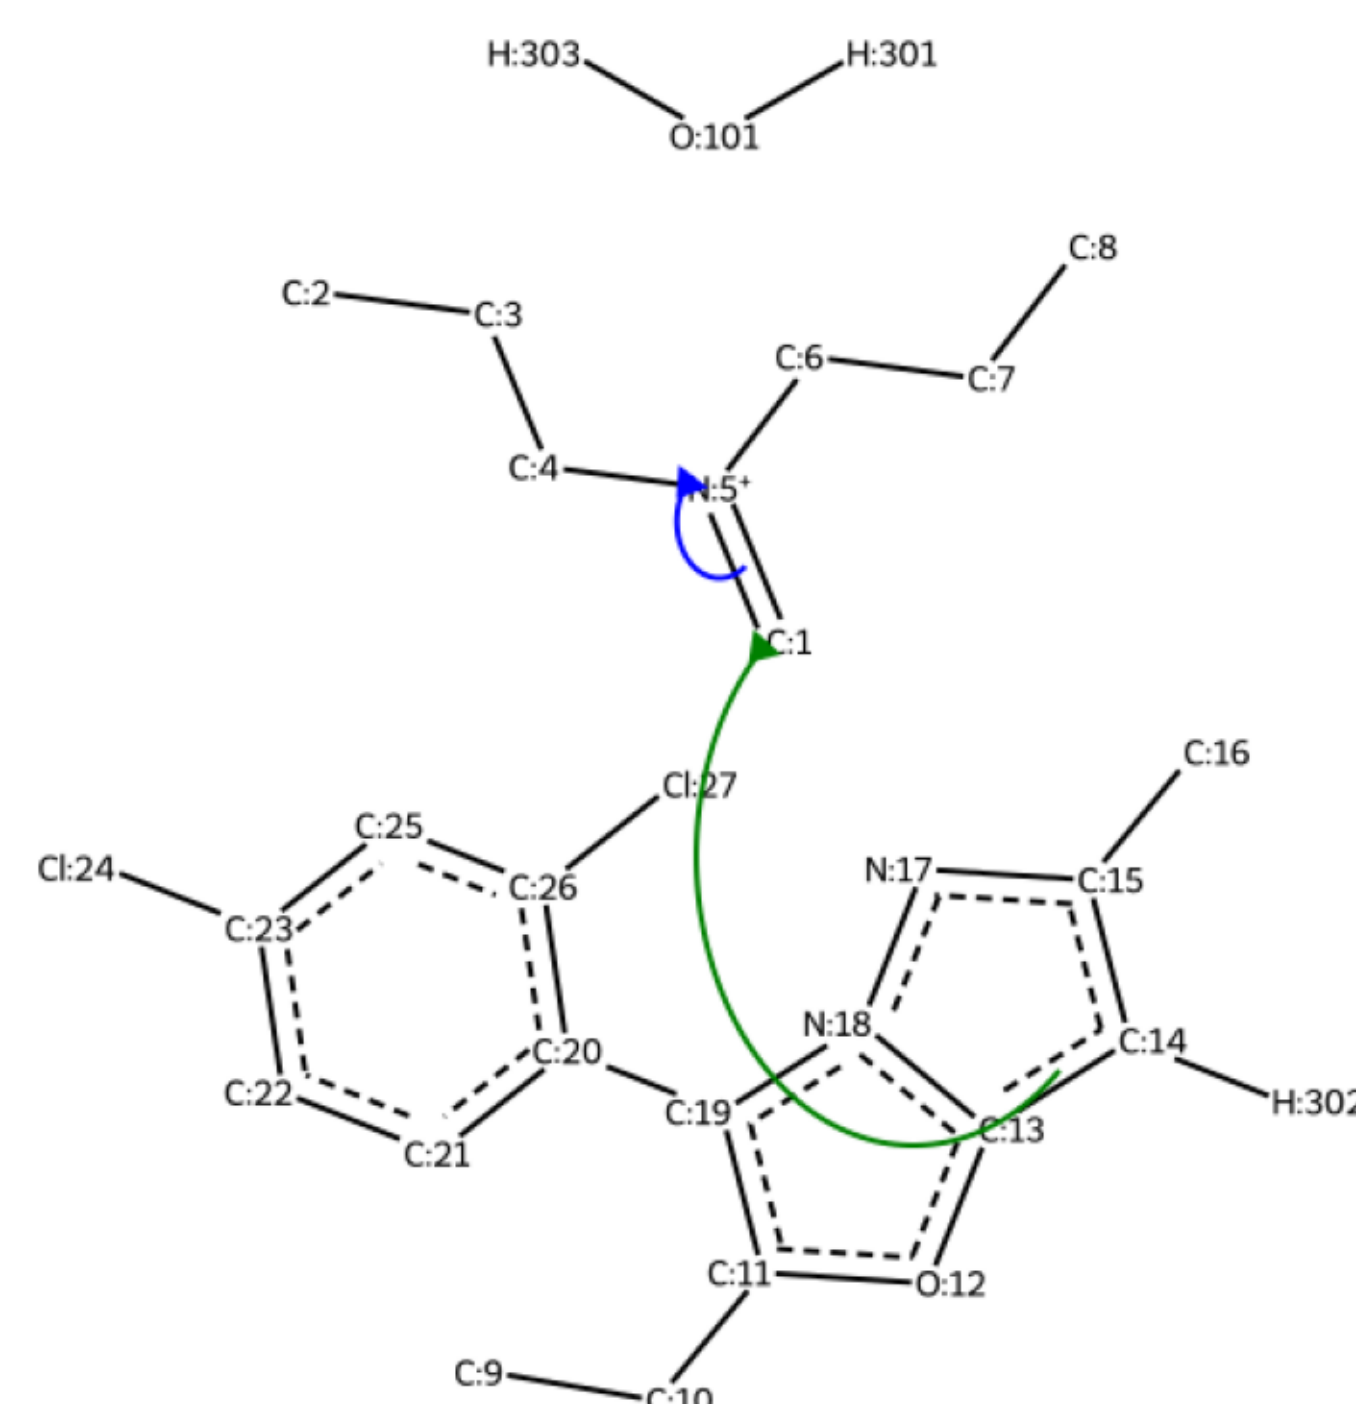

step #5

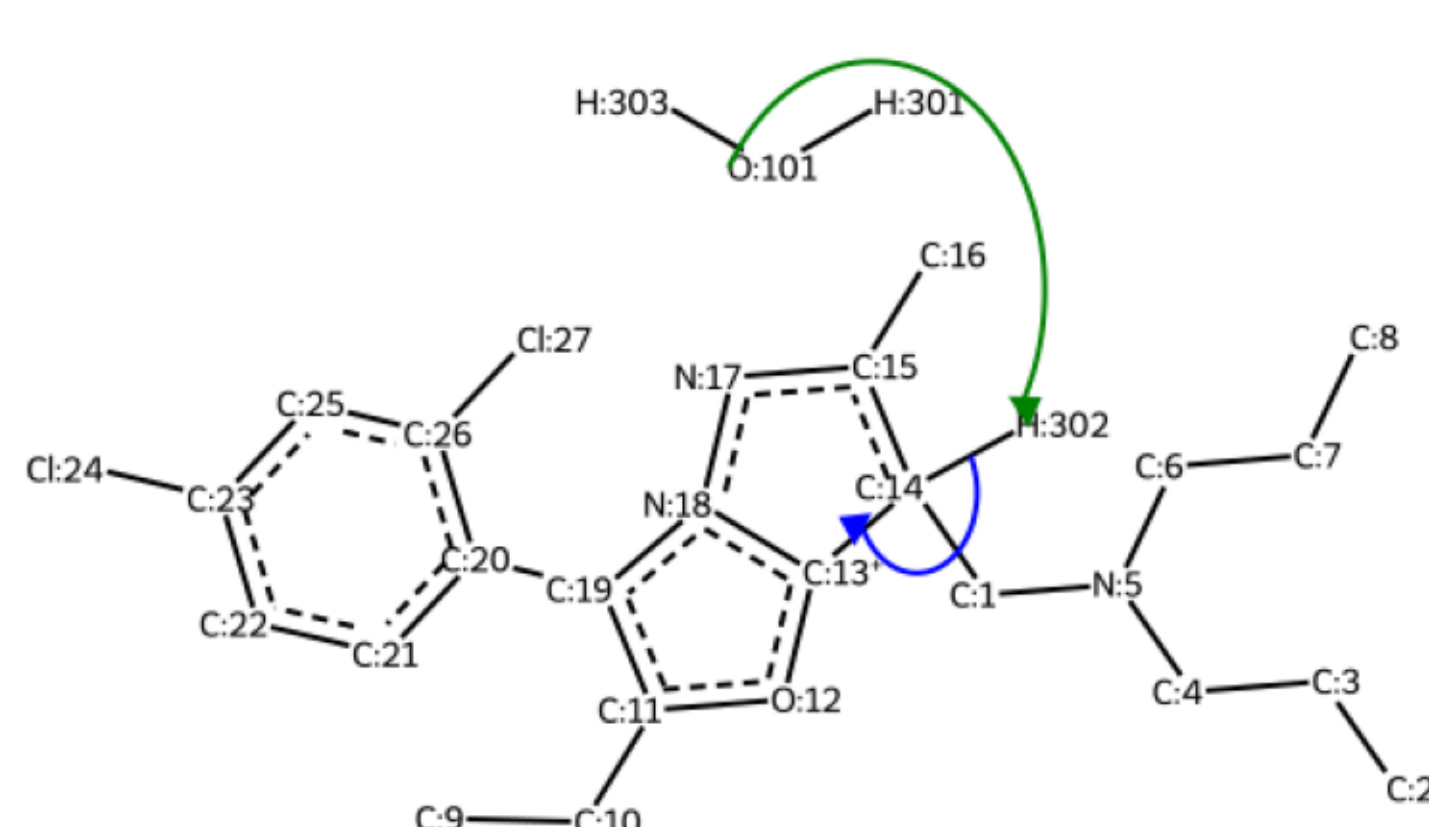

Product(s)

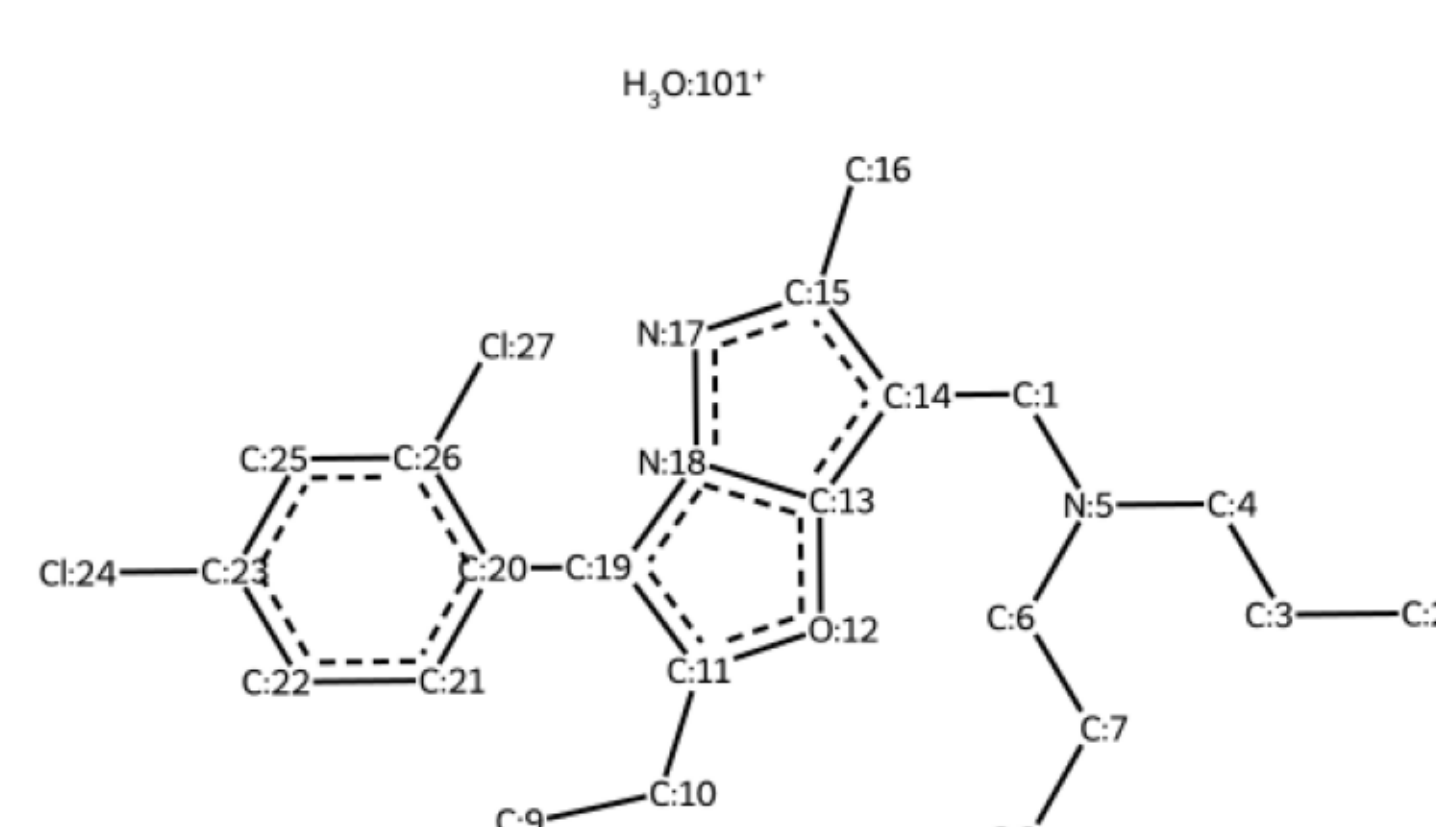

Original reaction  
sampled RXN\_ID:10)

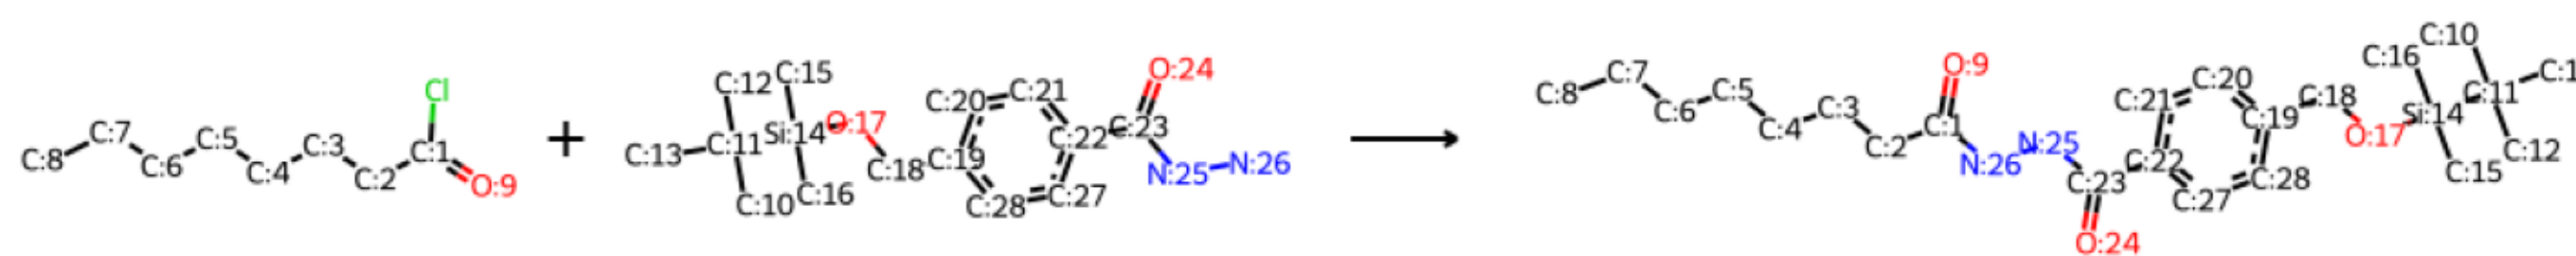

Identified mechanistic class -  
nucleophilic\_attack\_to\_(thio)carbonyl\_or\_sulfonyl reaction

Reaction with missing reagents recovered

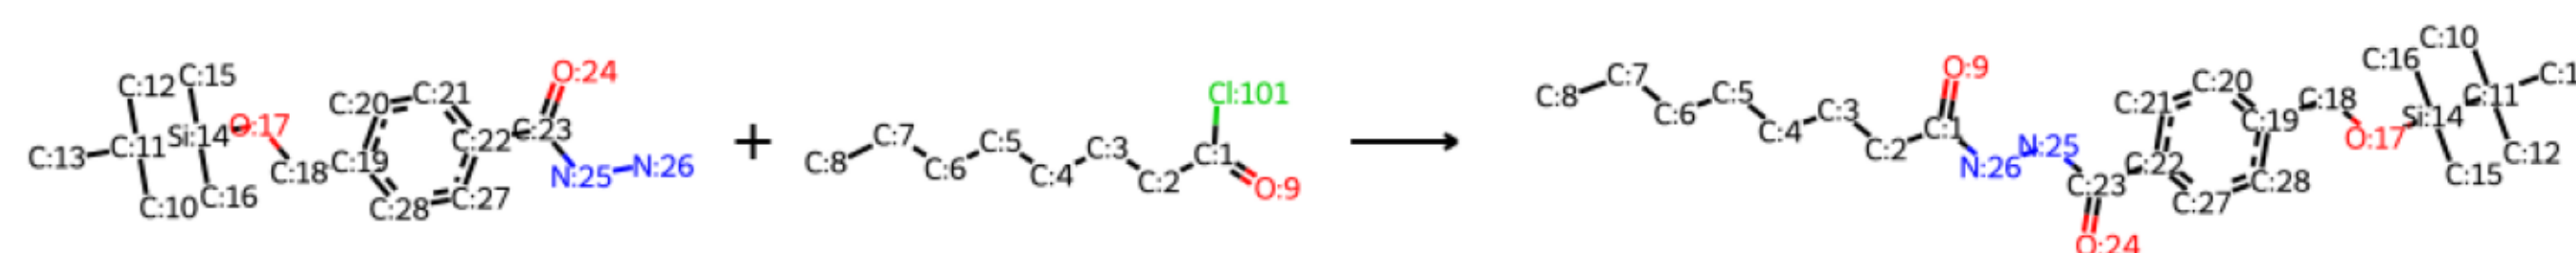

Proposed mechanistic pathway

[Arrow order: (1) green, (2) blue, (3) red, (4) orange]

step #1

step #2

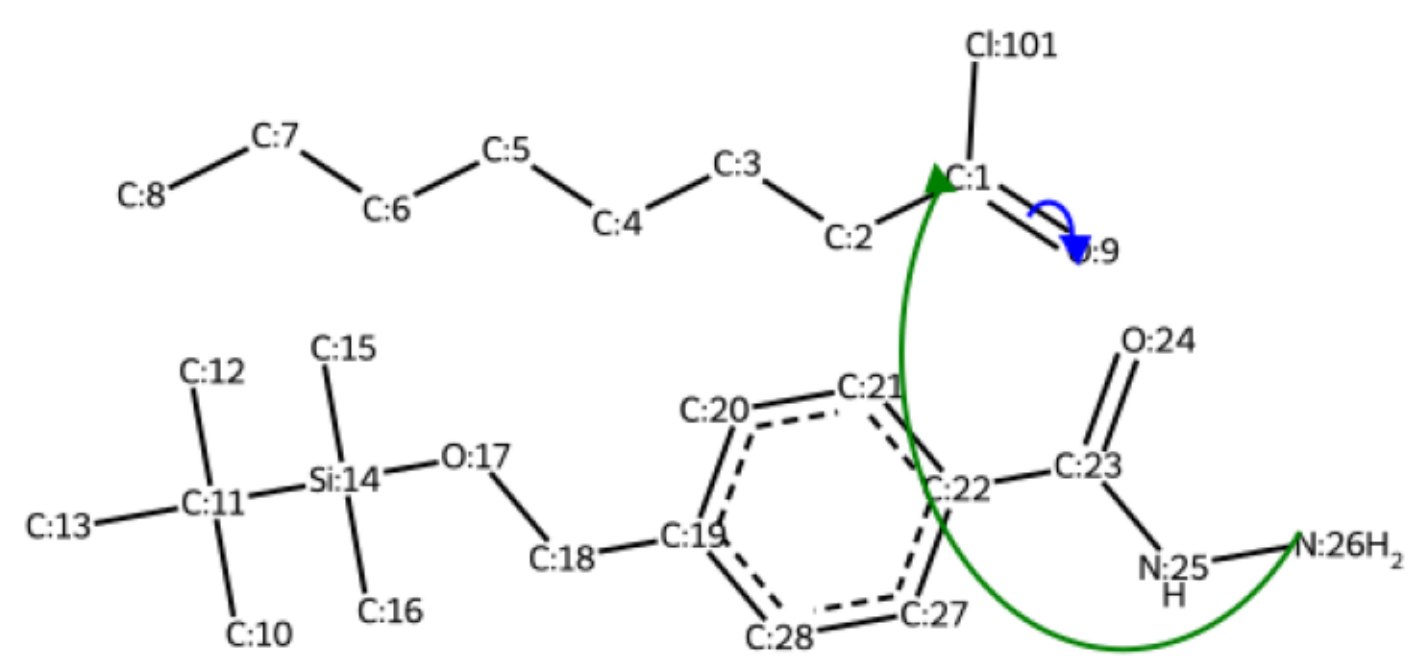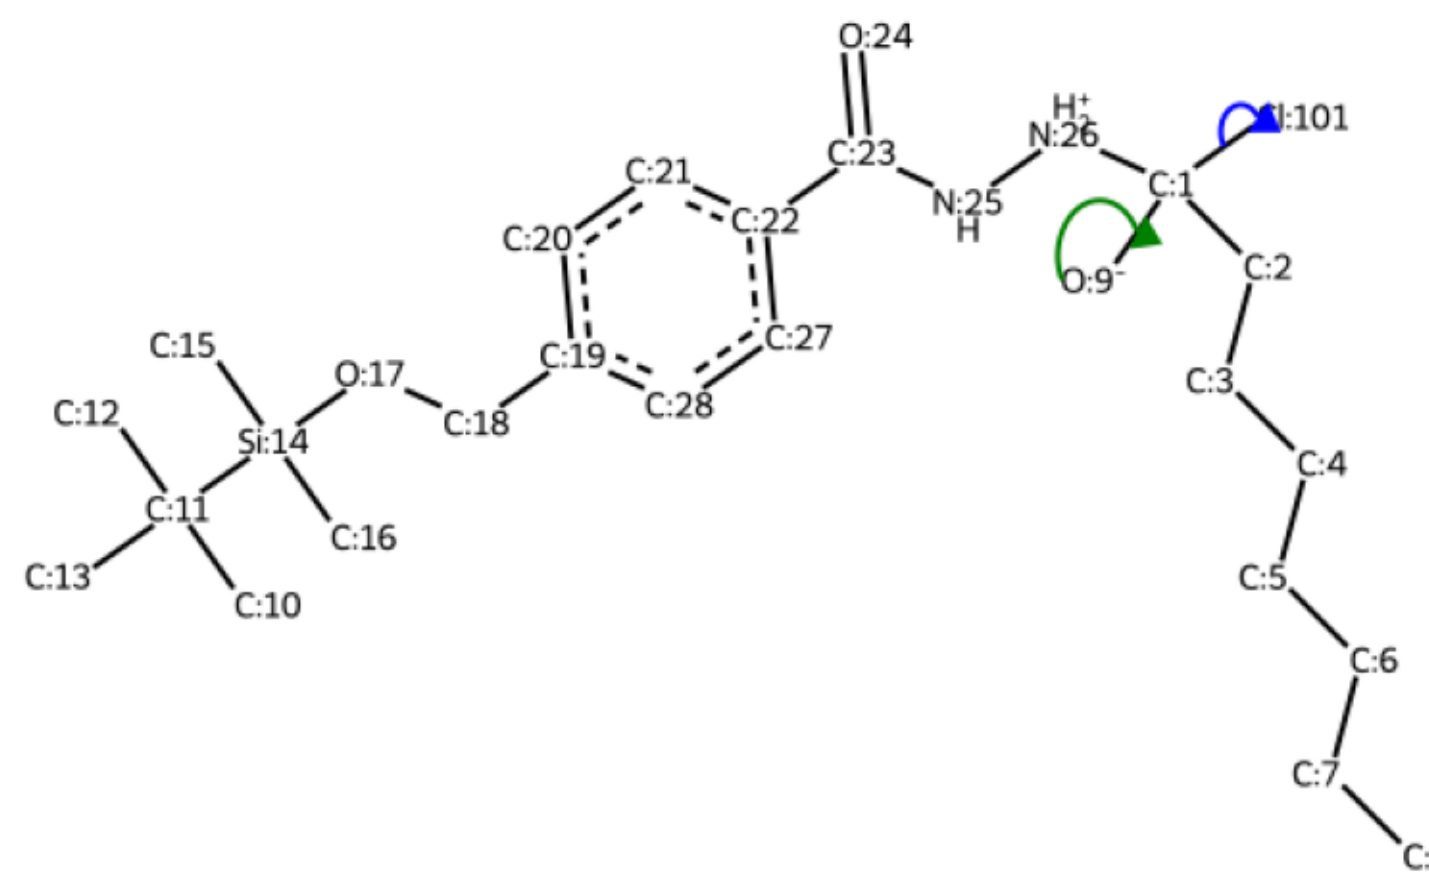

Product(s)

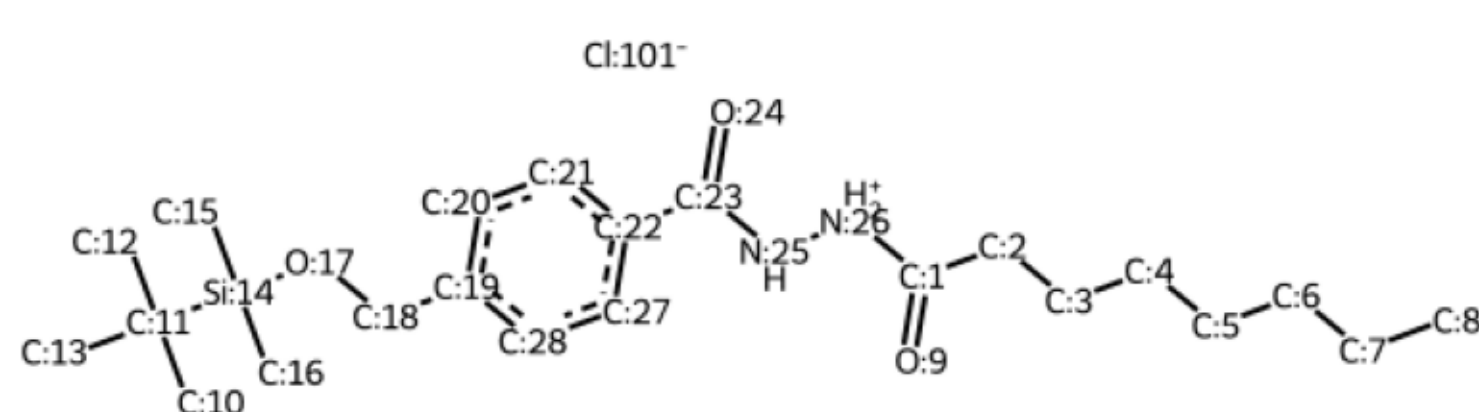

proton transfer

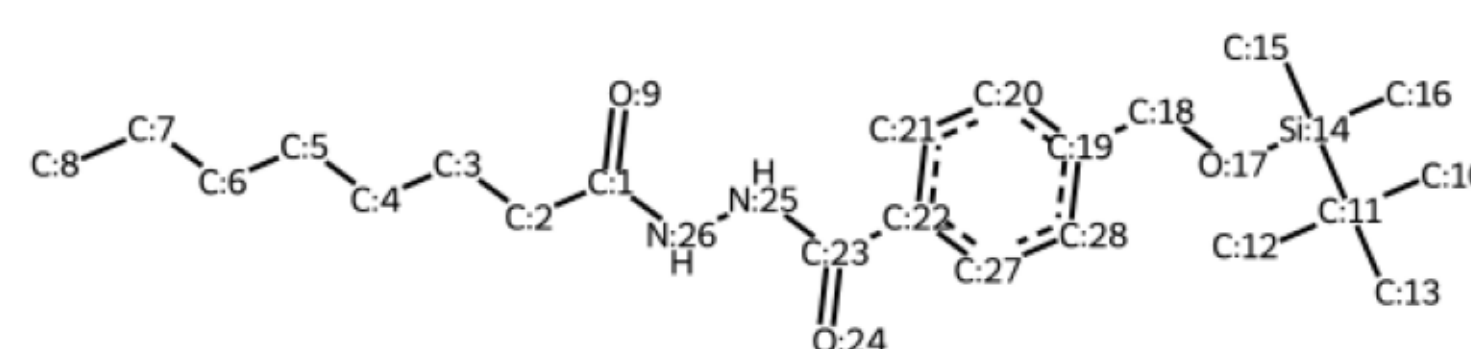







Original reaction  
sampled RXN\_ID:12)

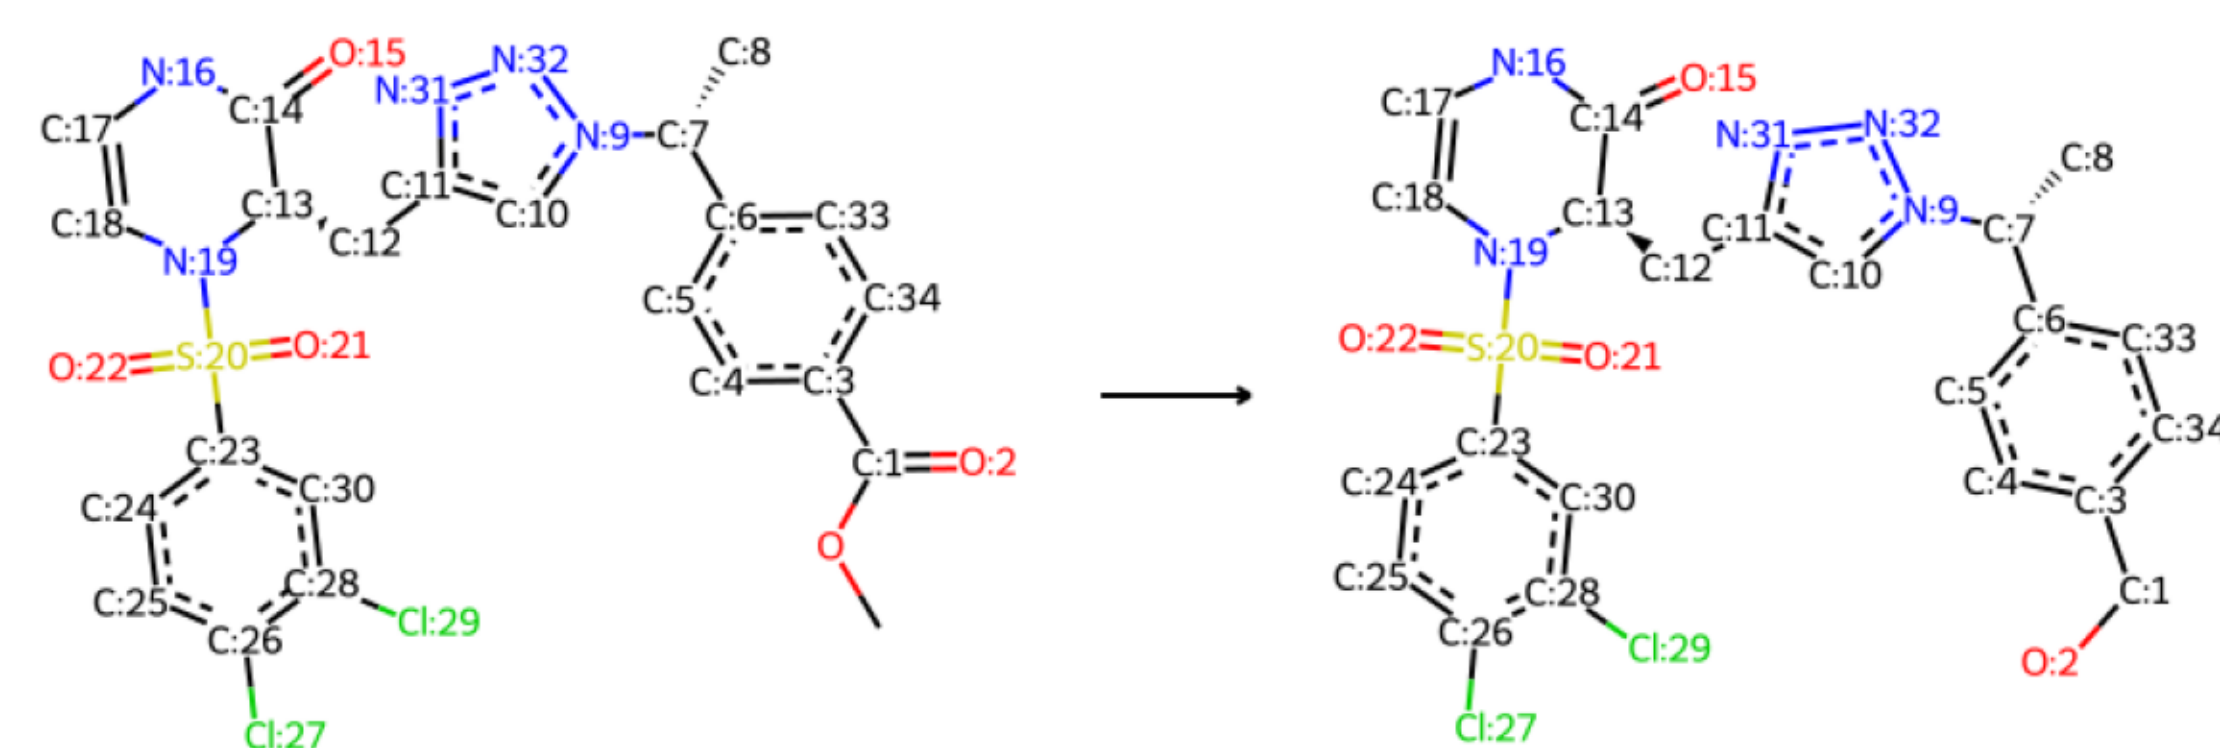

Identified mechanistic class -  
ester\_reduction reaction

Reaction with missing reagents recovered

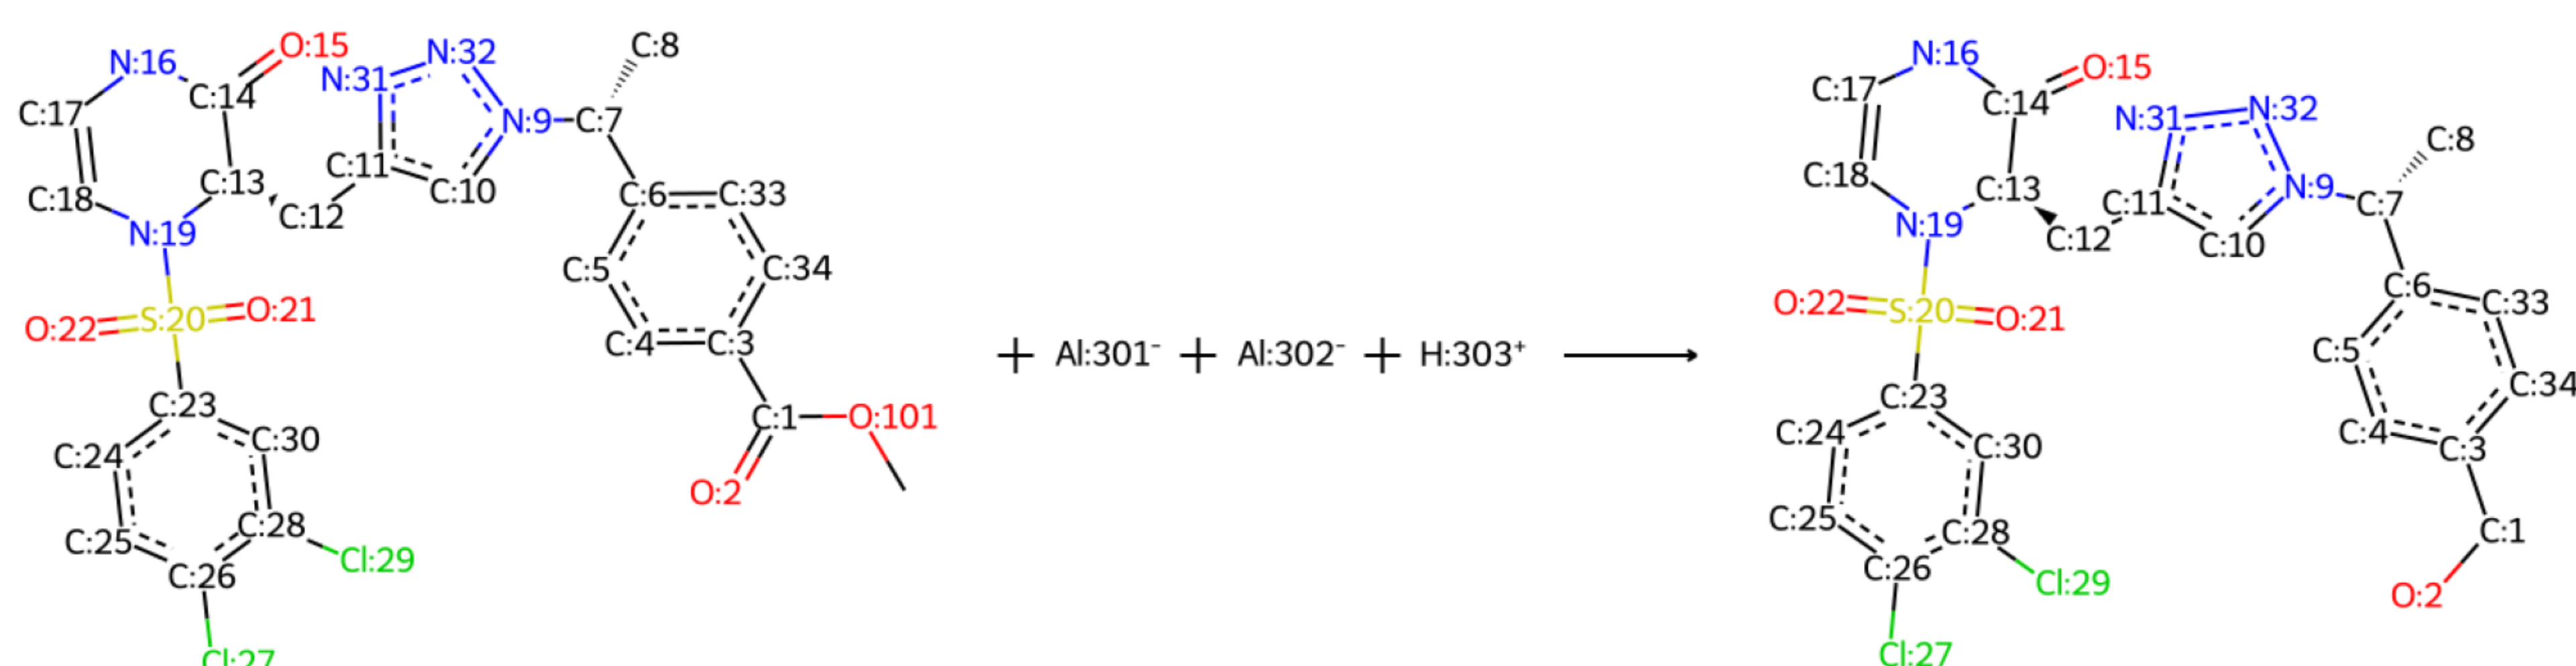

Proposed mechanistic pathway

[Arrow order: (1) green, (2) blue, (3) red, (4) orange]

step #1

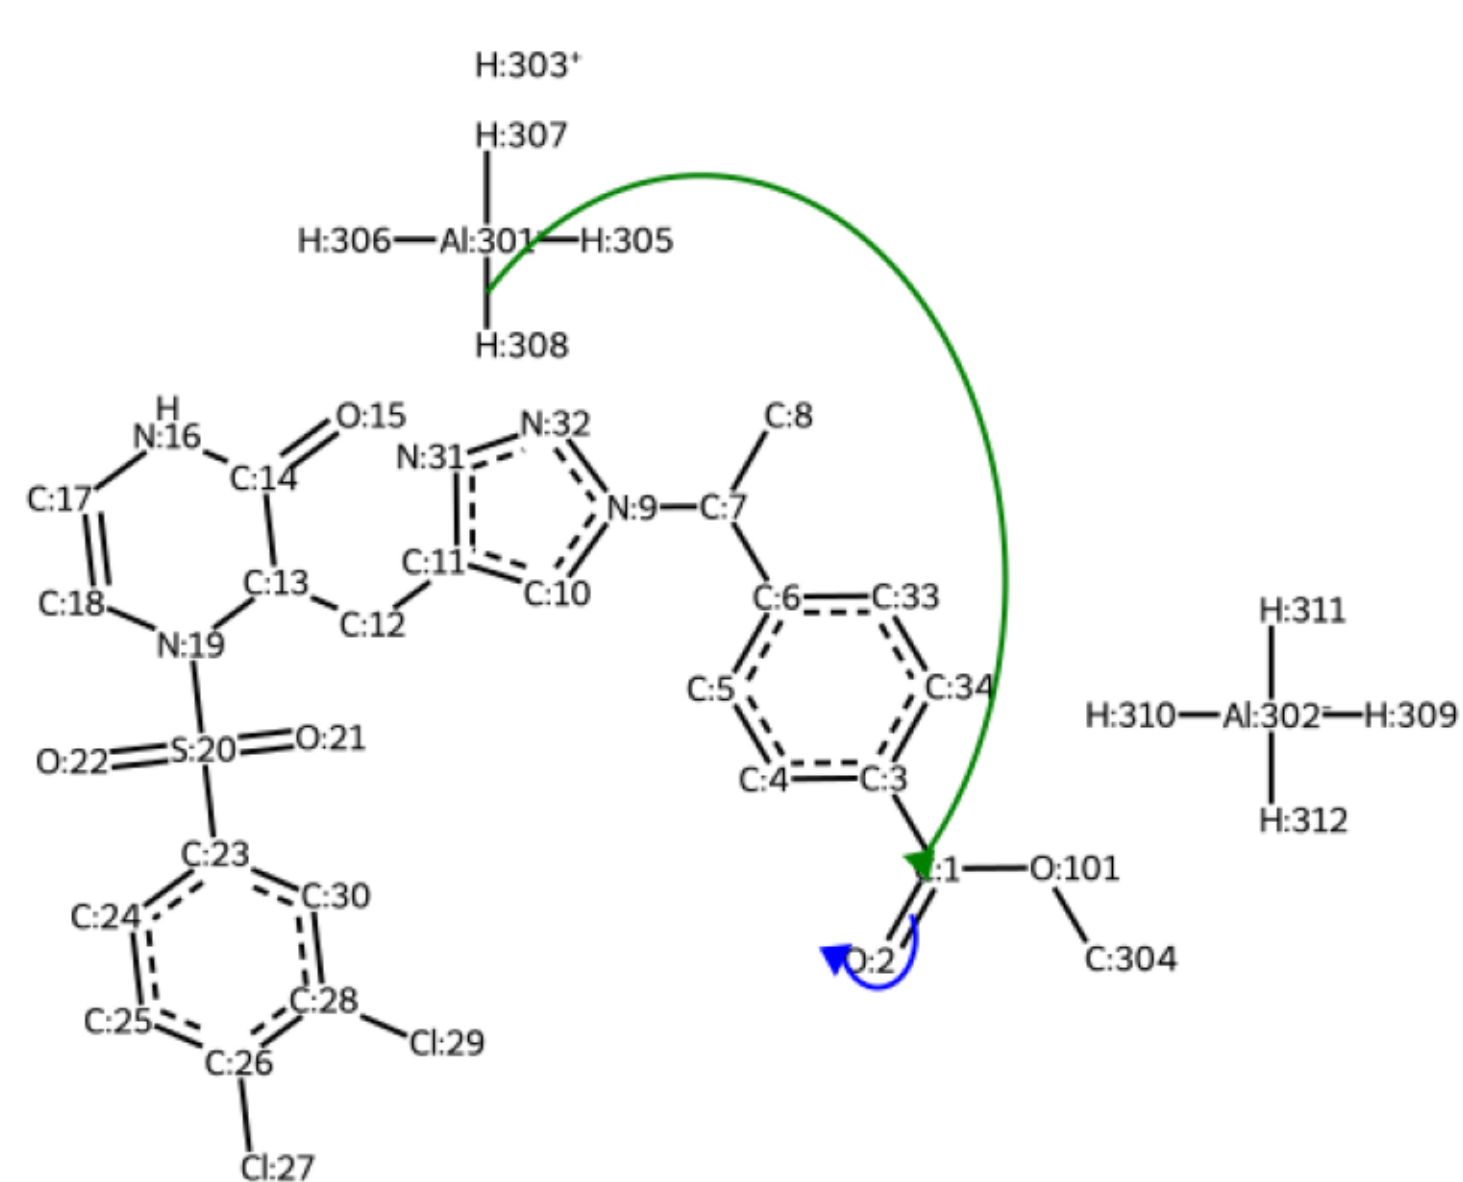

step #2

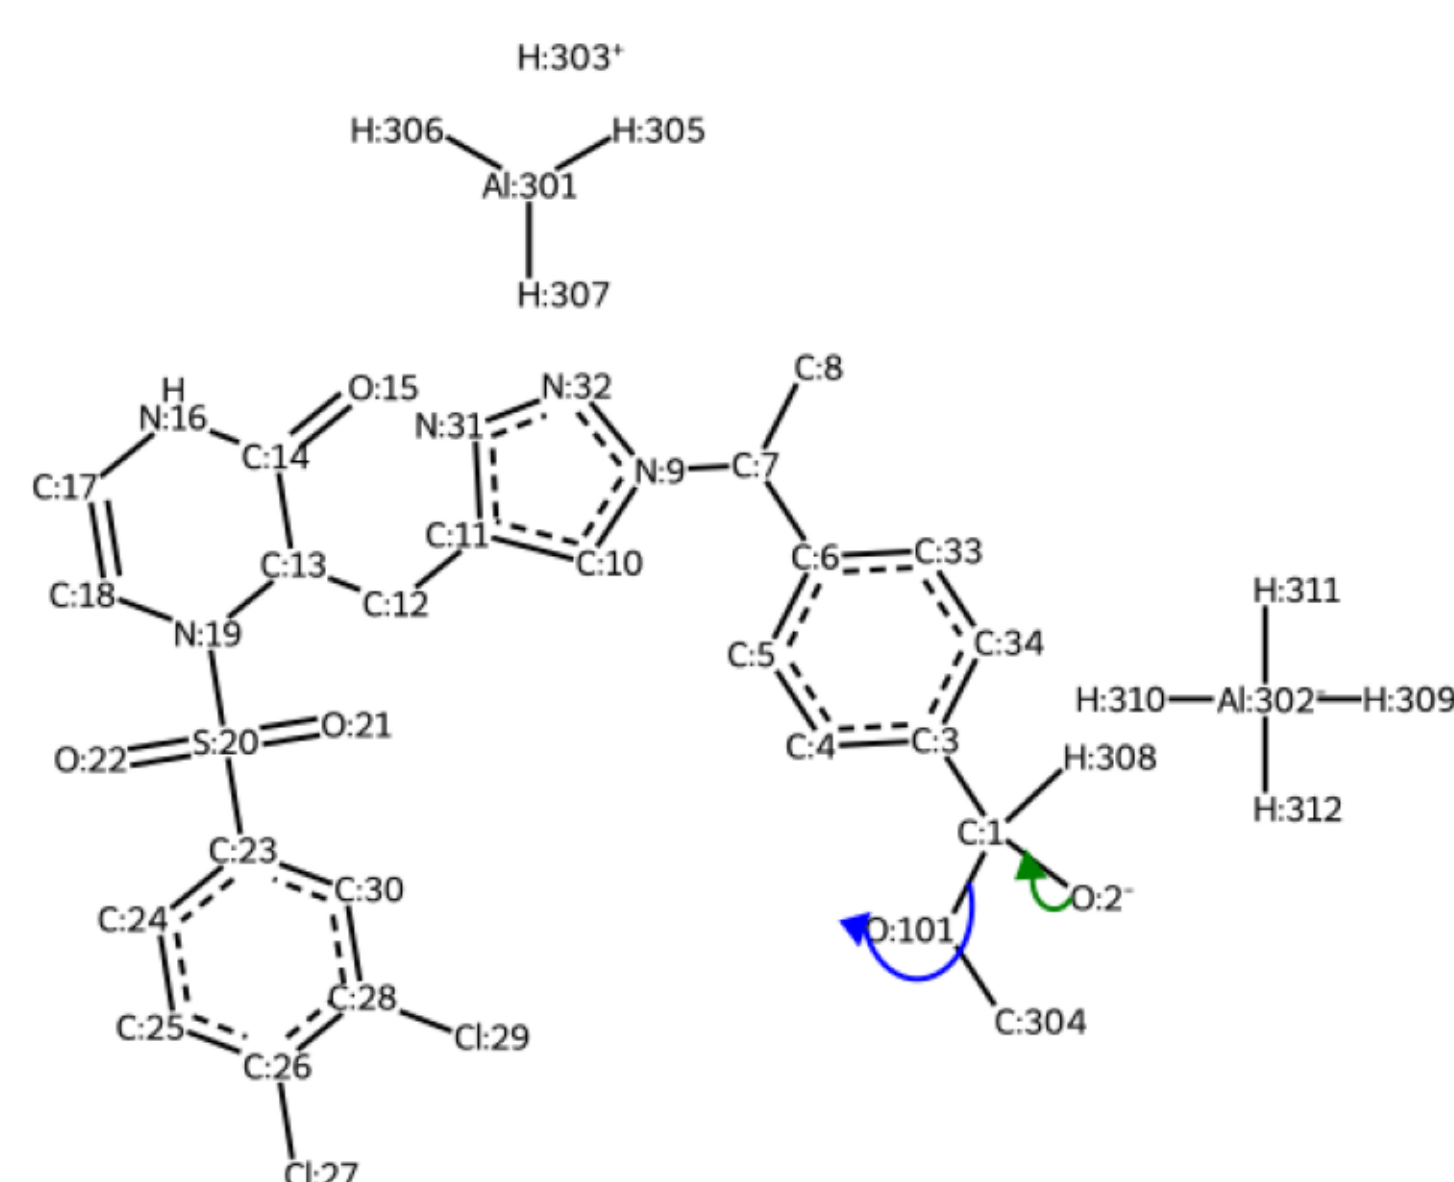

step #3

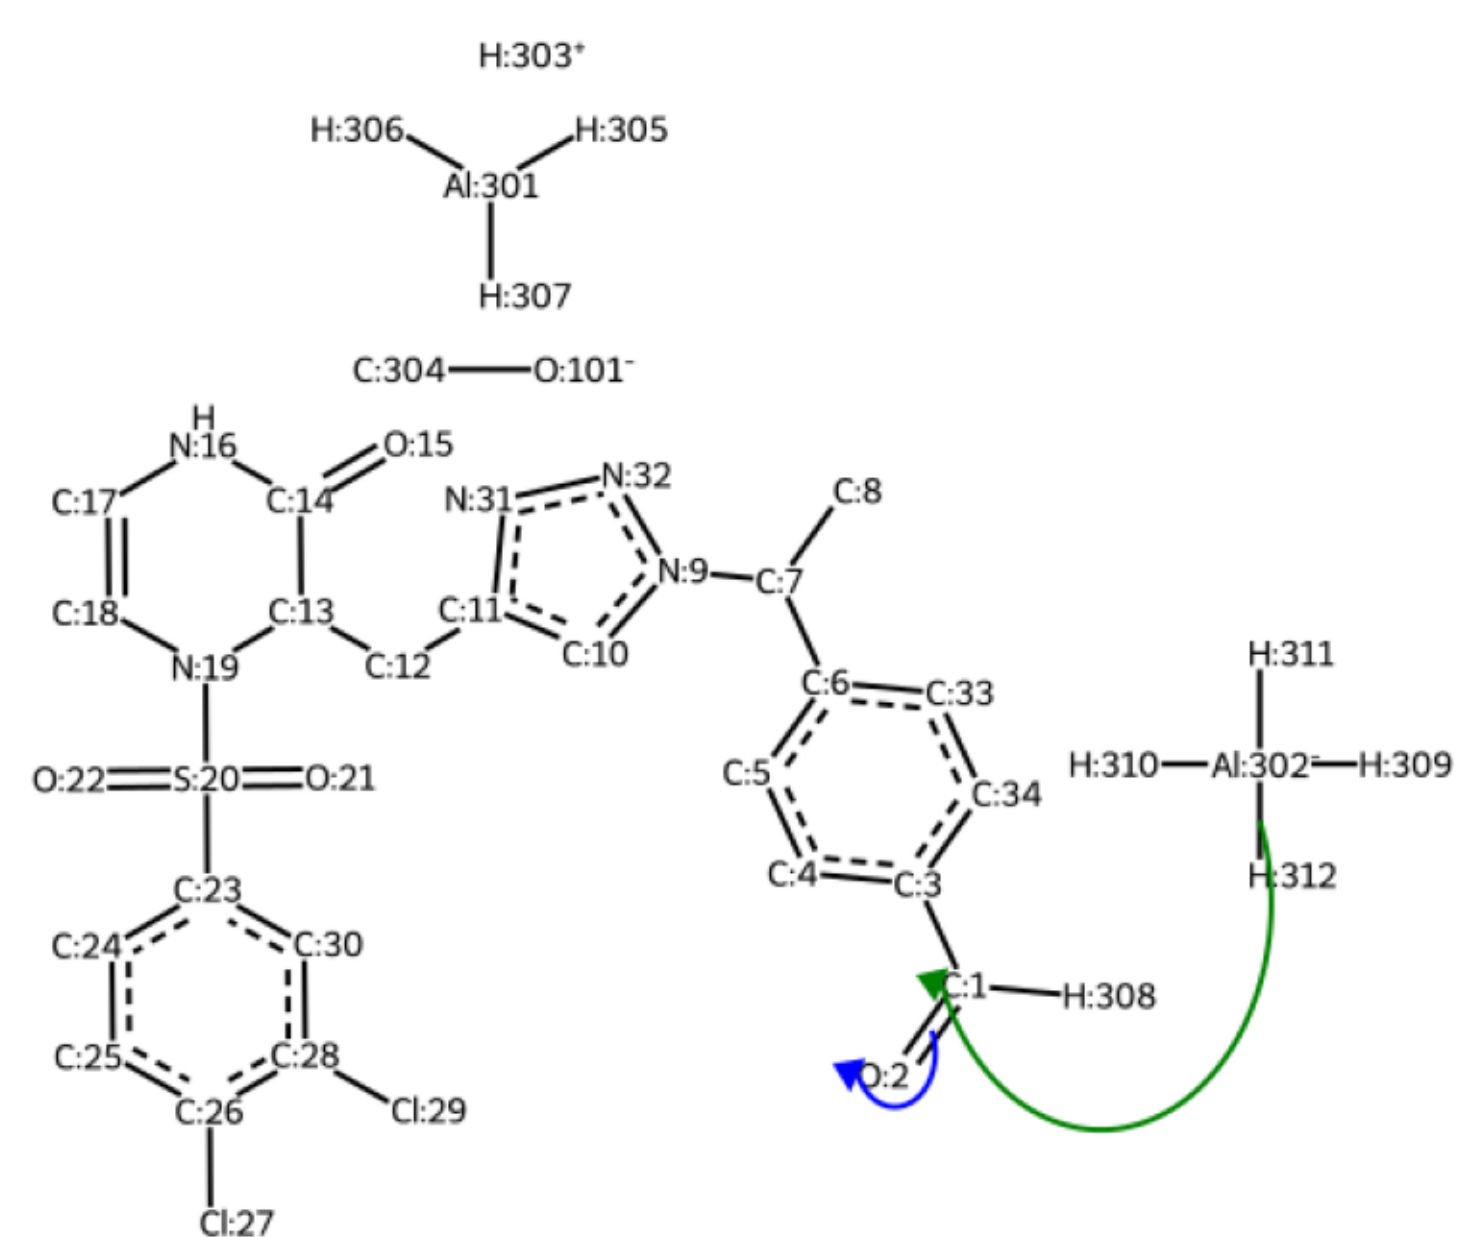

step #4

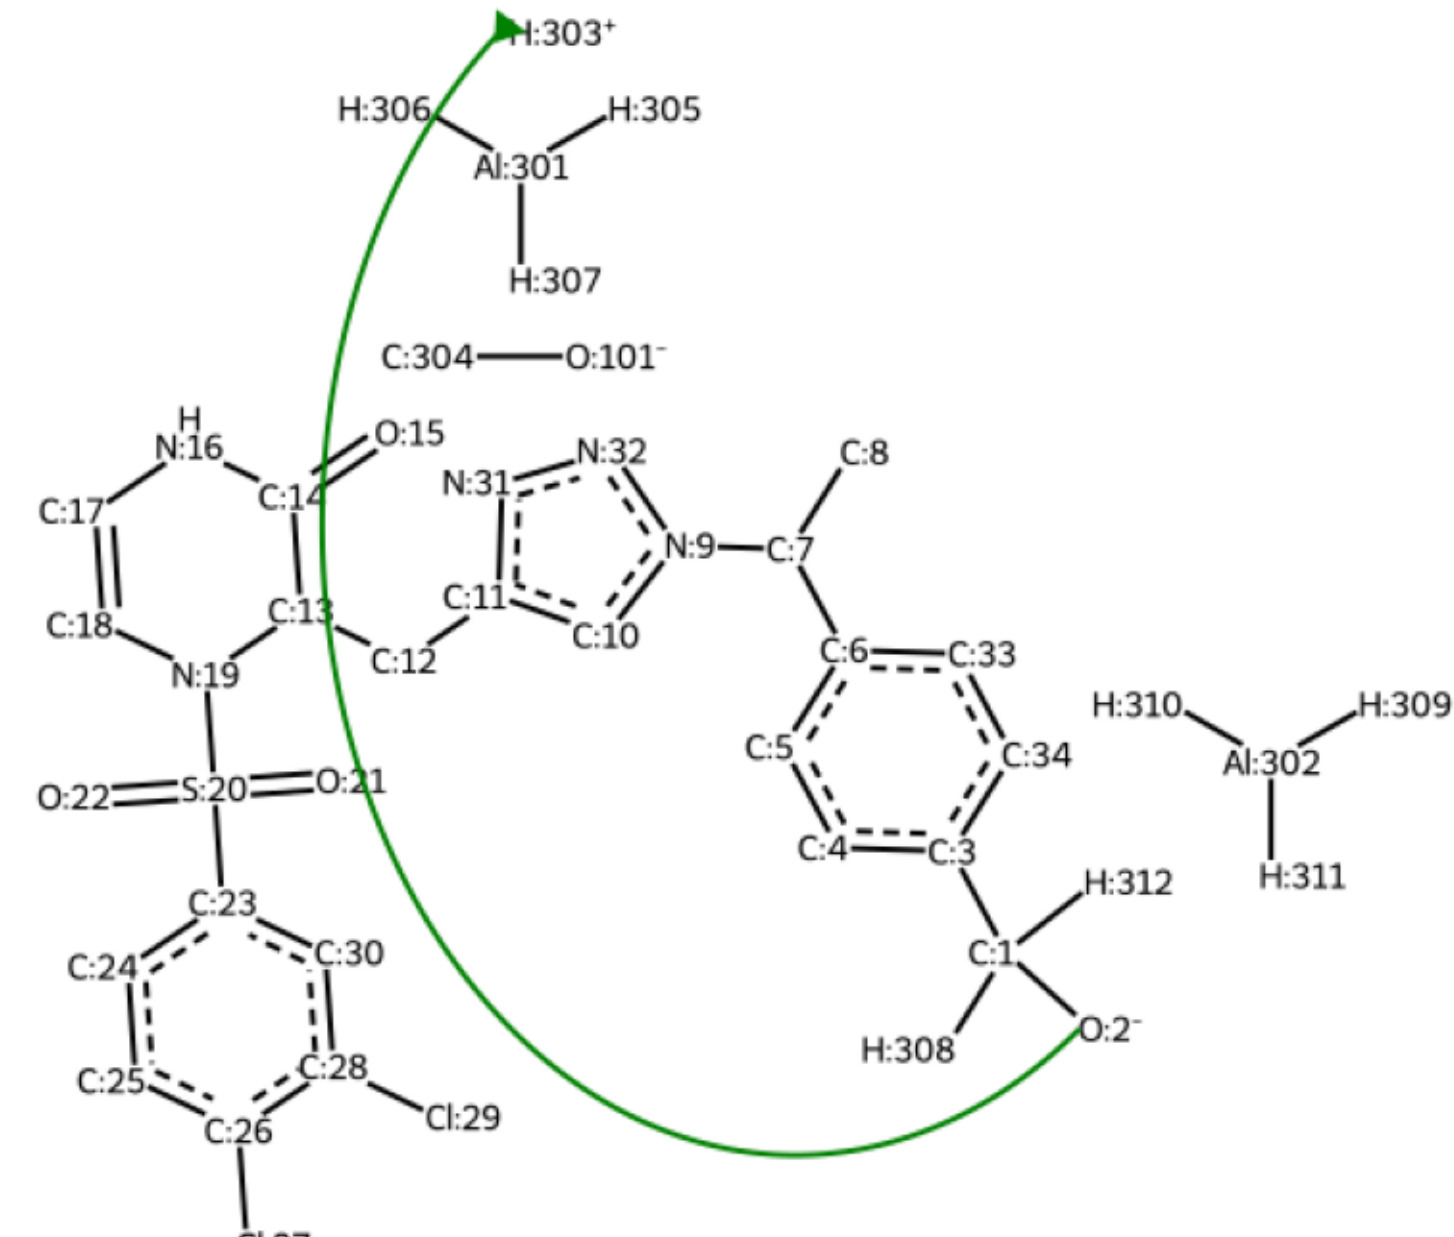

Product(s)

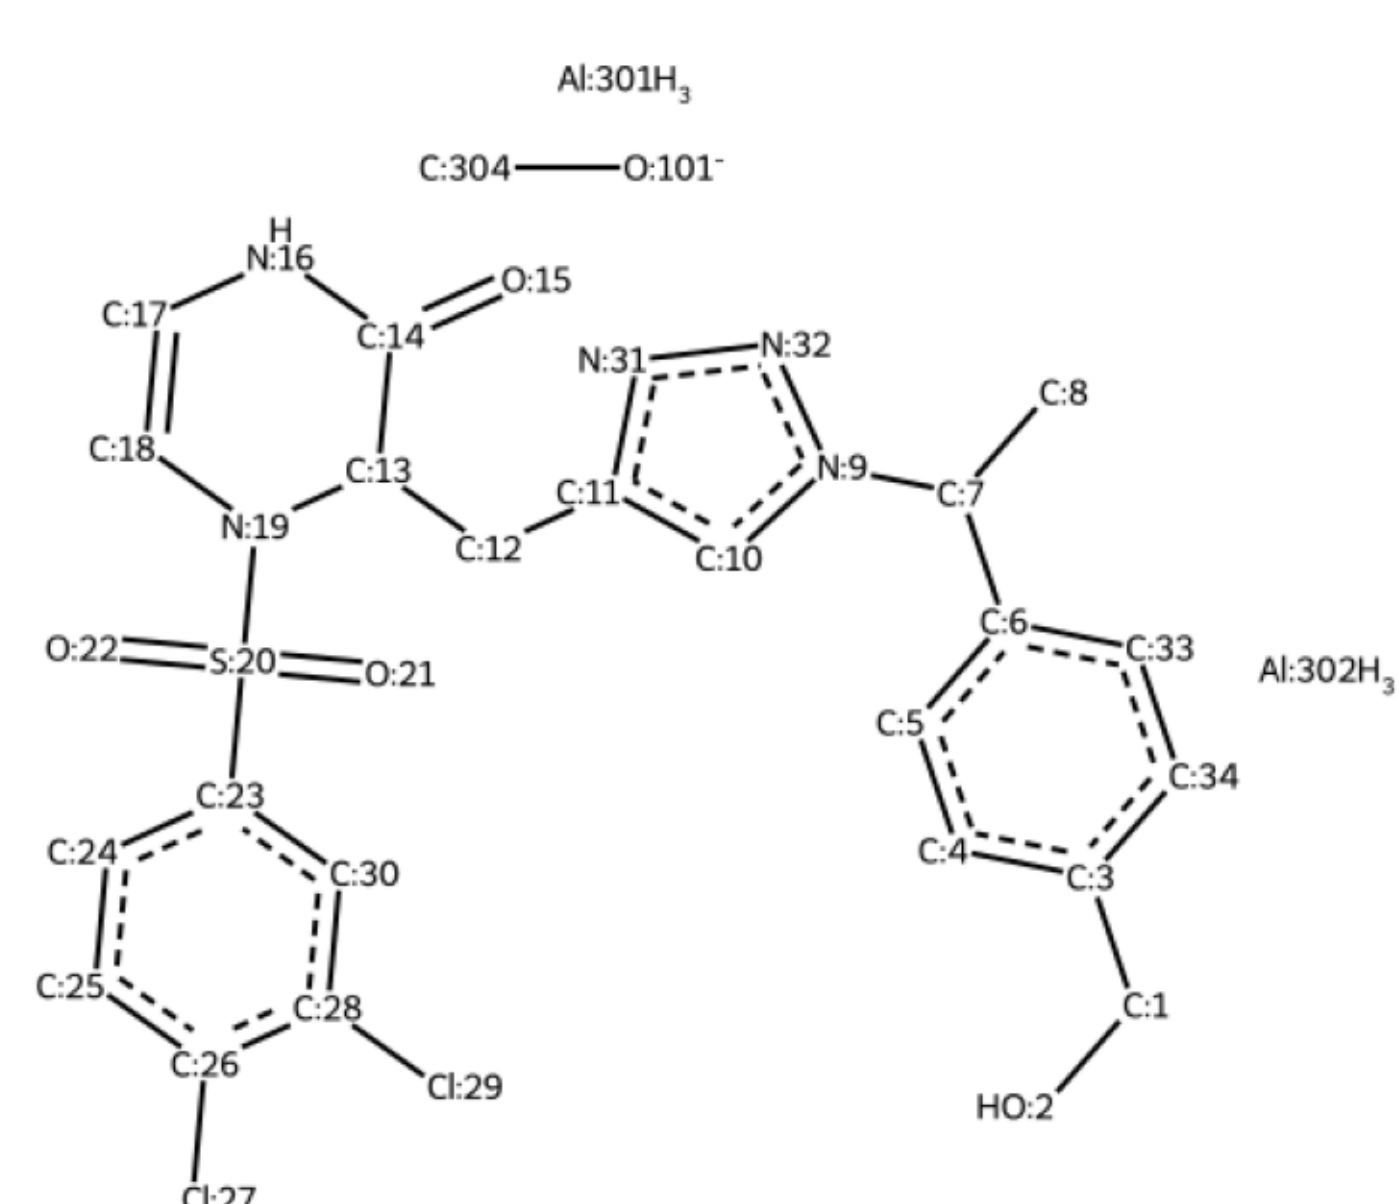



Original reaction  
sampled RXN\_ID:13)

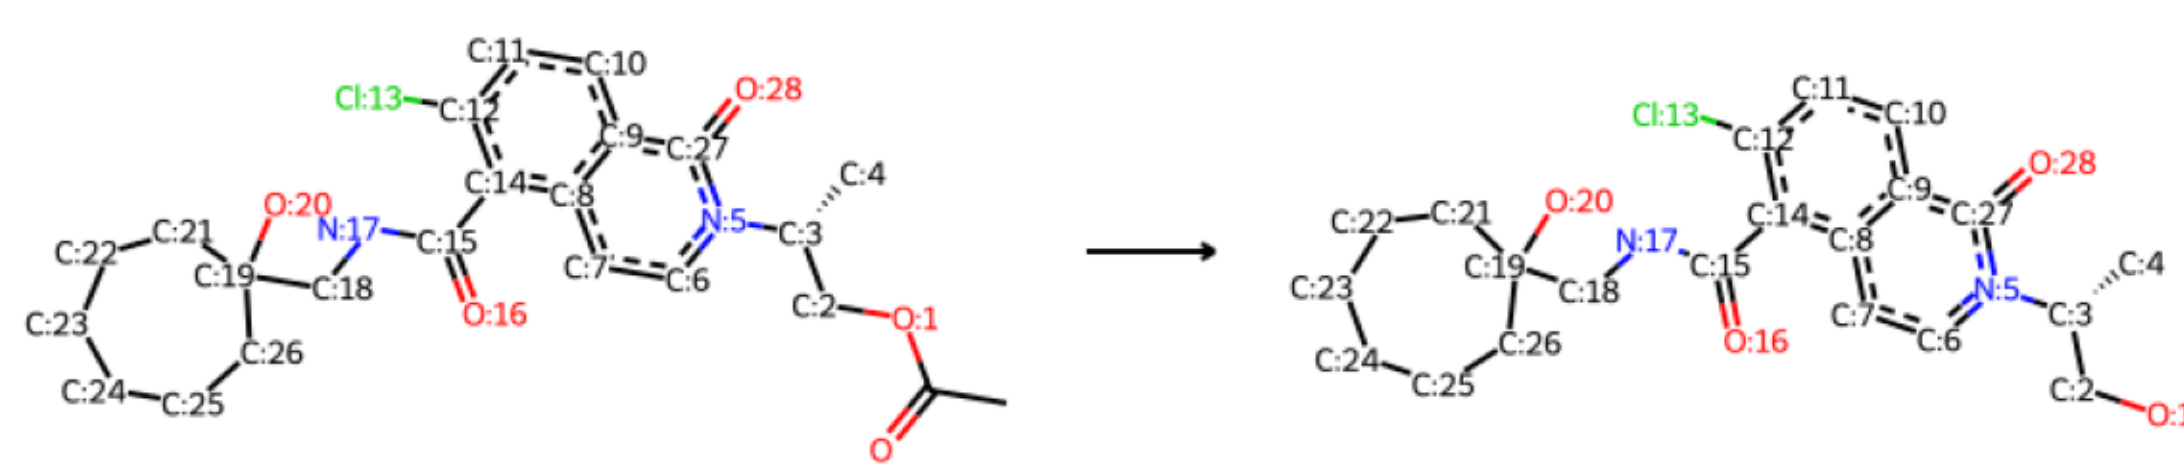

Identified mechanistic class -  
base\_cat\_ester\_hydrolysis reaction

Reaction with missing reagents recovered

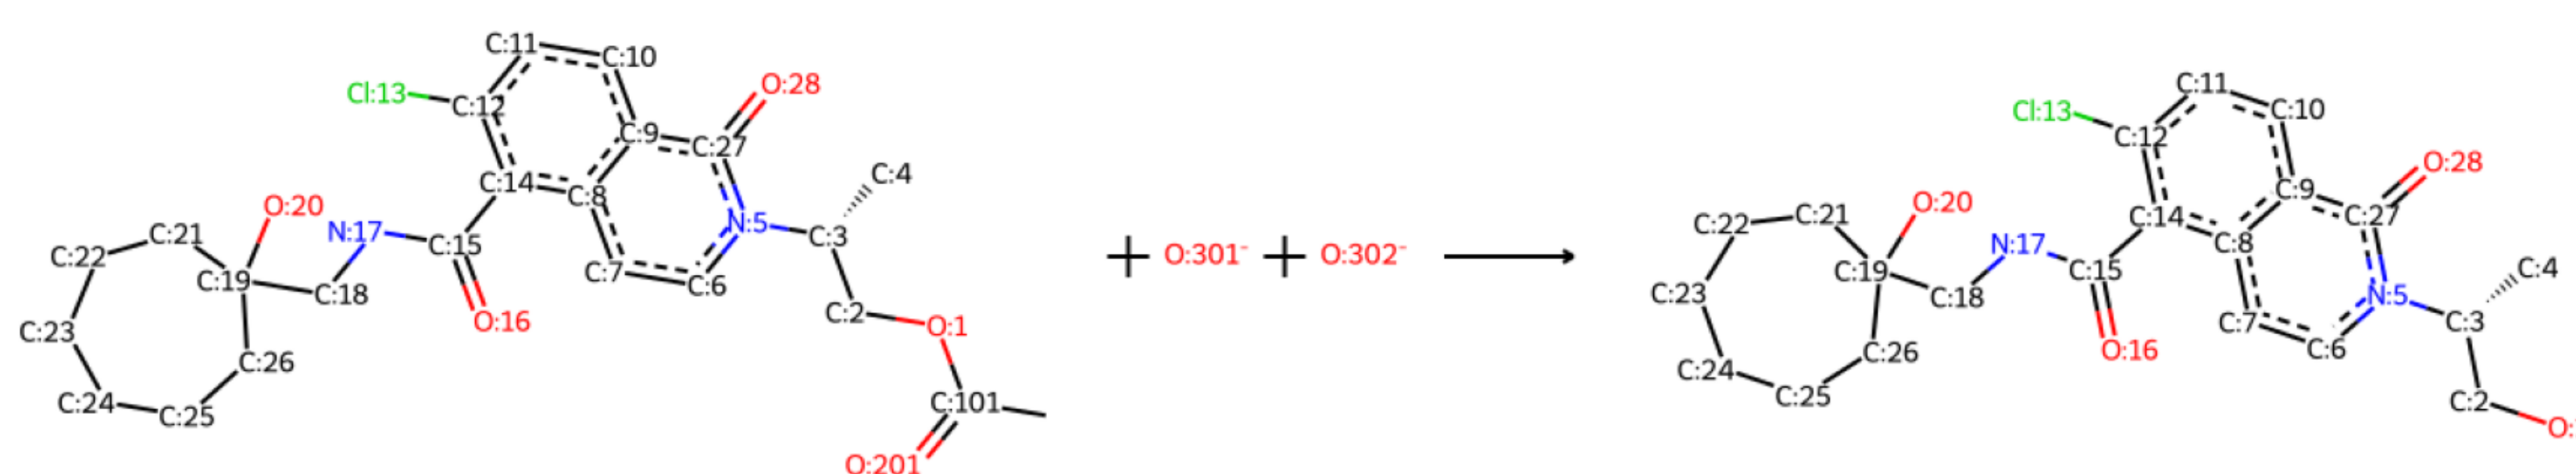

Proposed mechanistic pathway

[Arrow order: (1) green, (2) blue, (3) red, (4) orange]

step #1

step #2

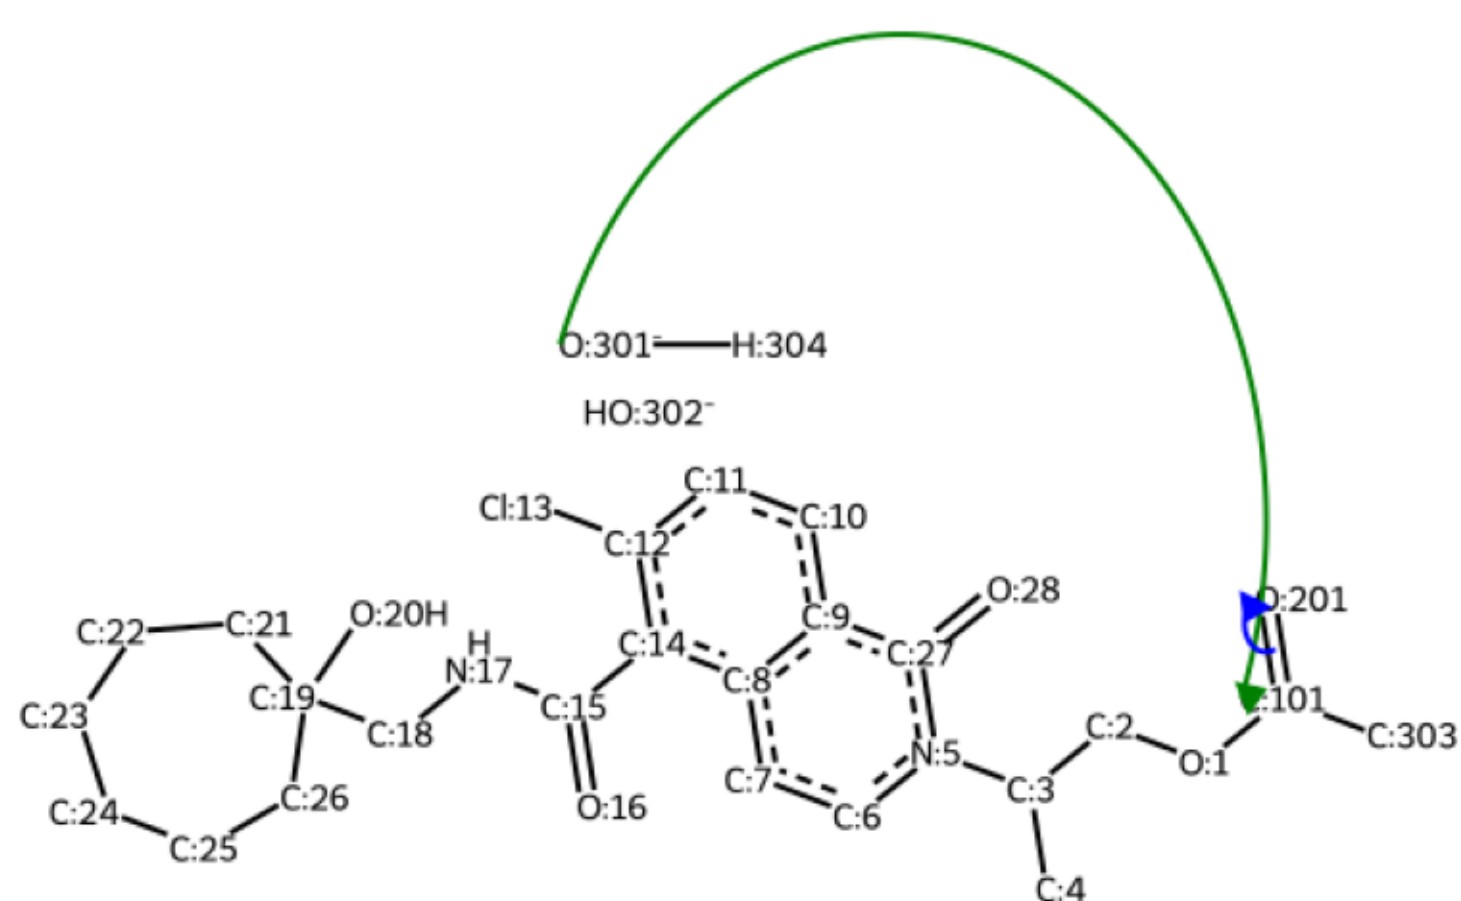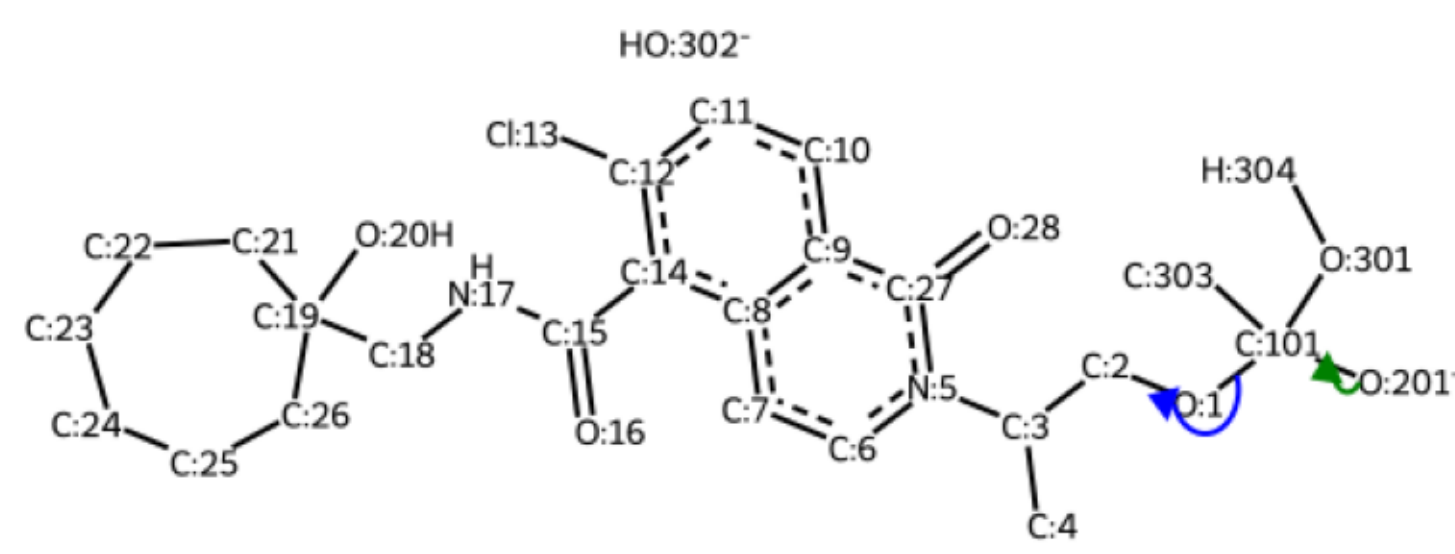

step #3

Product(s)

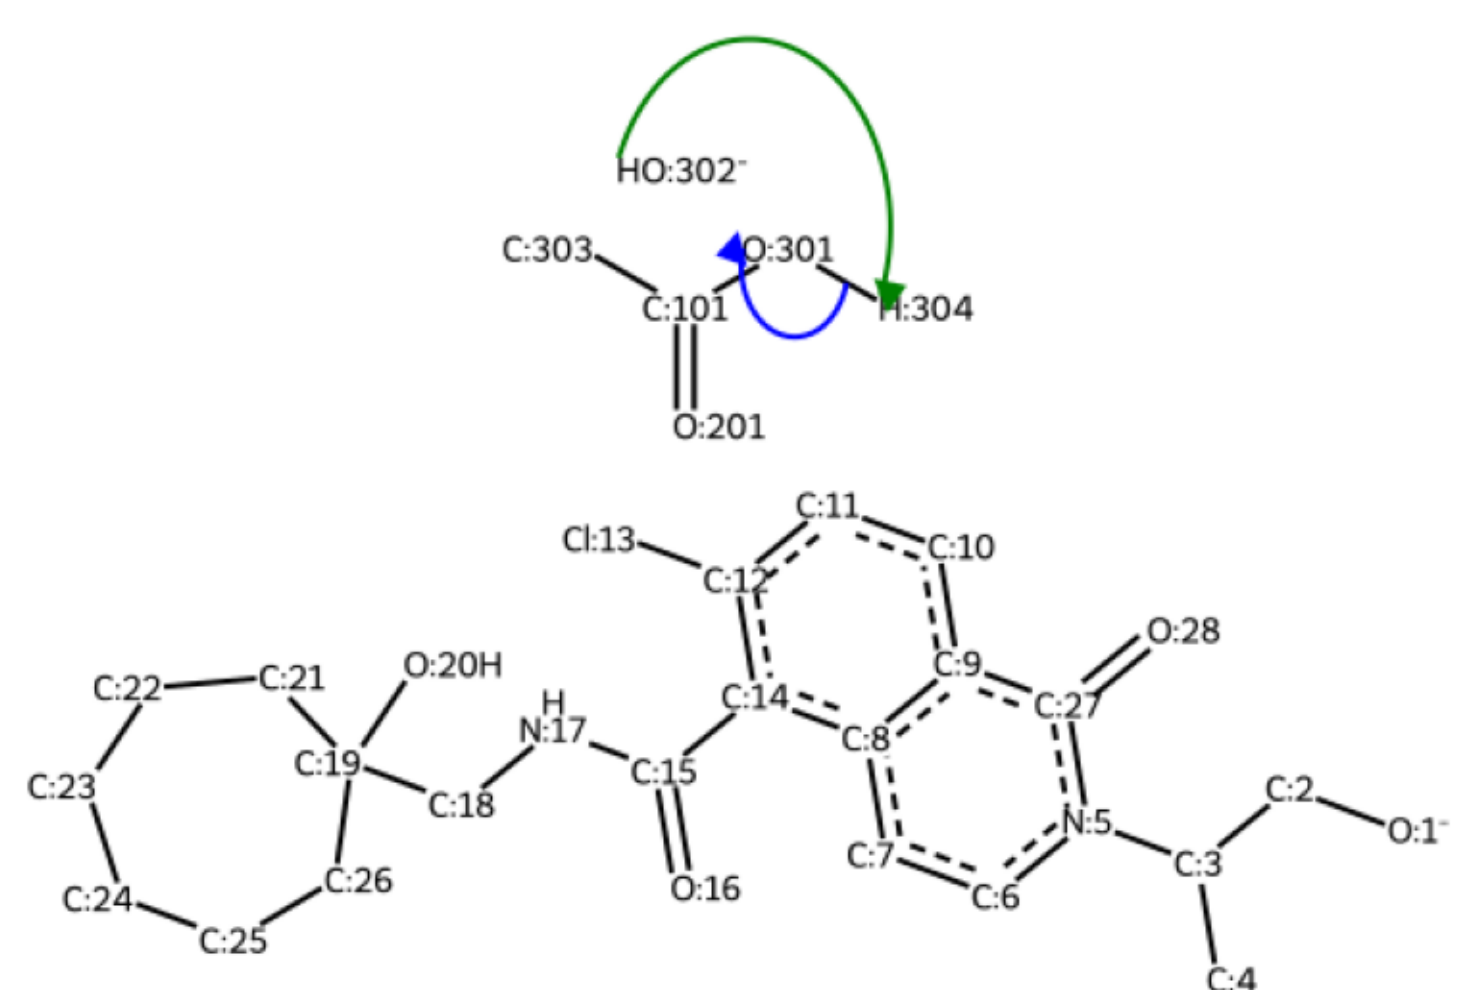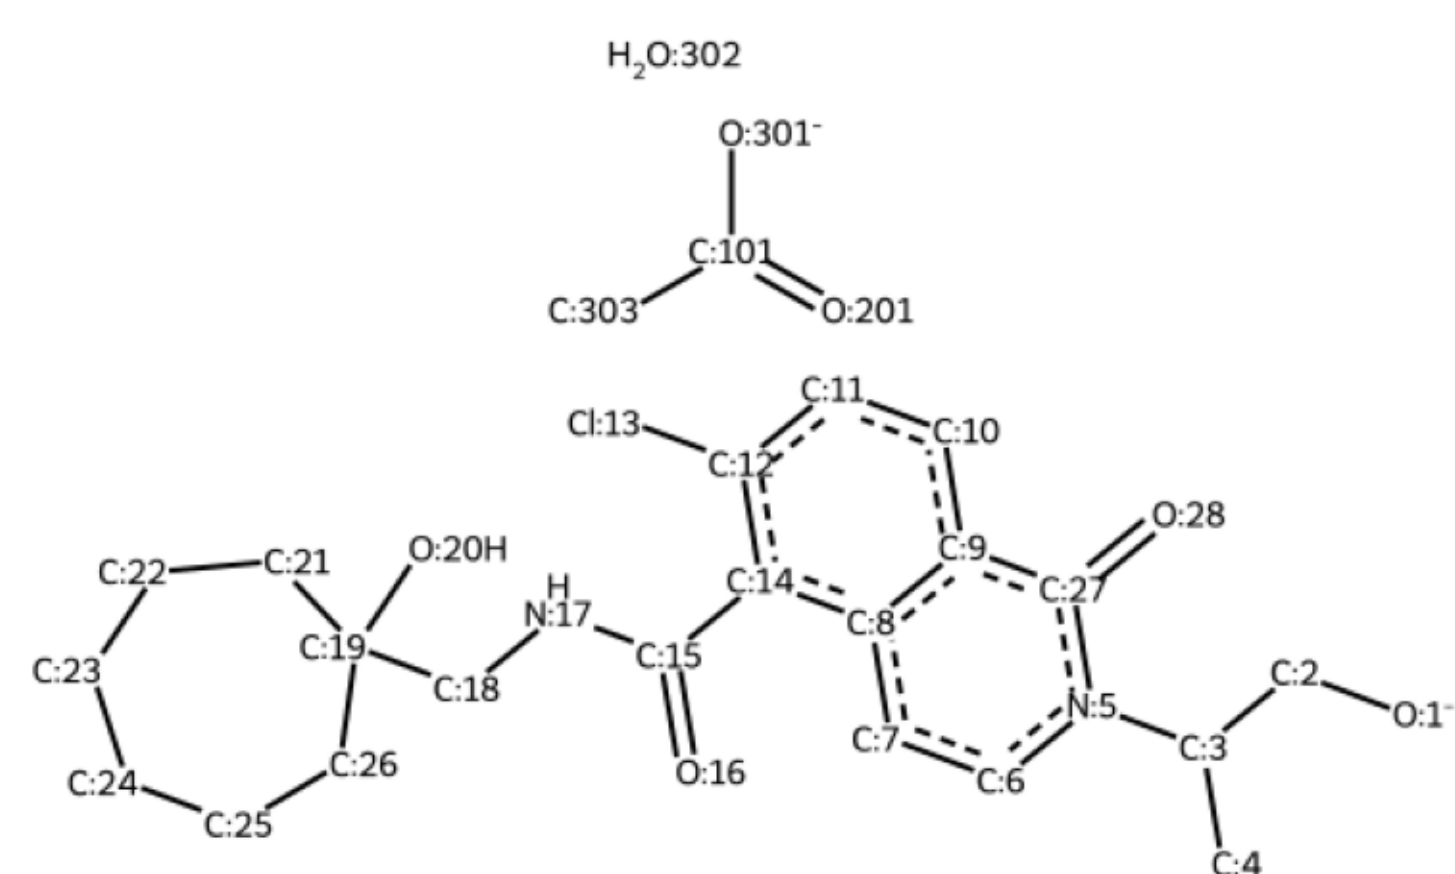



# Original reaction sampled RXN\_ID:14)

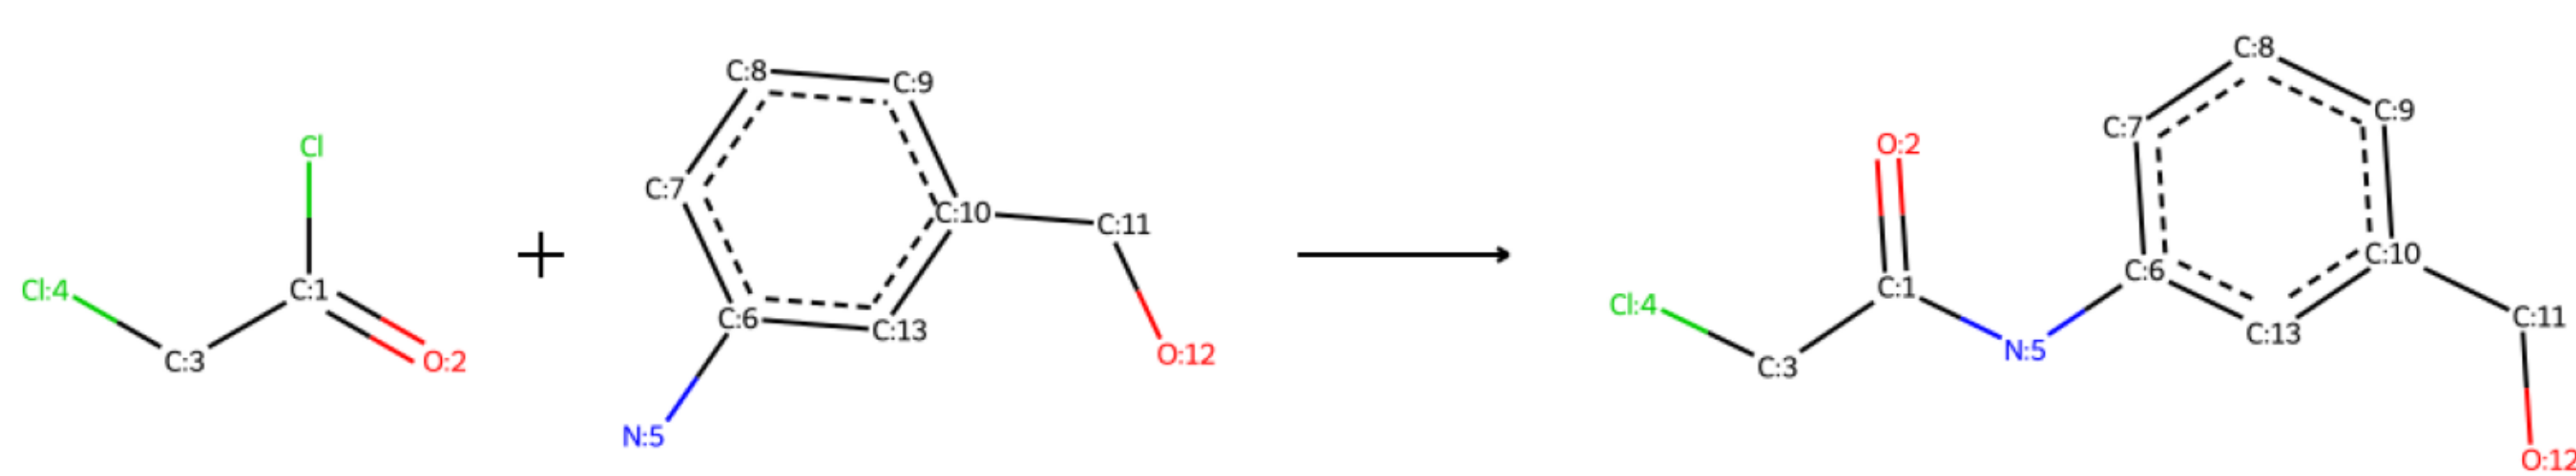

Identified mechanistic class -  
nucleophilic\_attack\_to\_(thio)carbonyl\_or\_sulfonyl reaction

## Reaction with missing reagents recovered

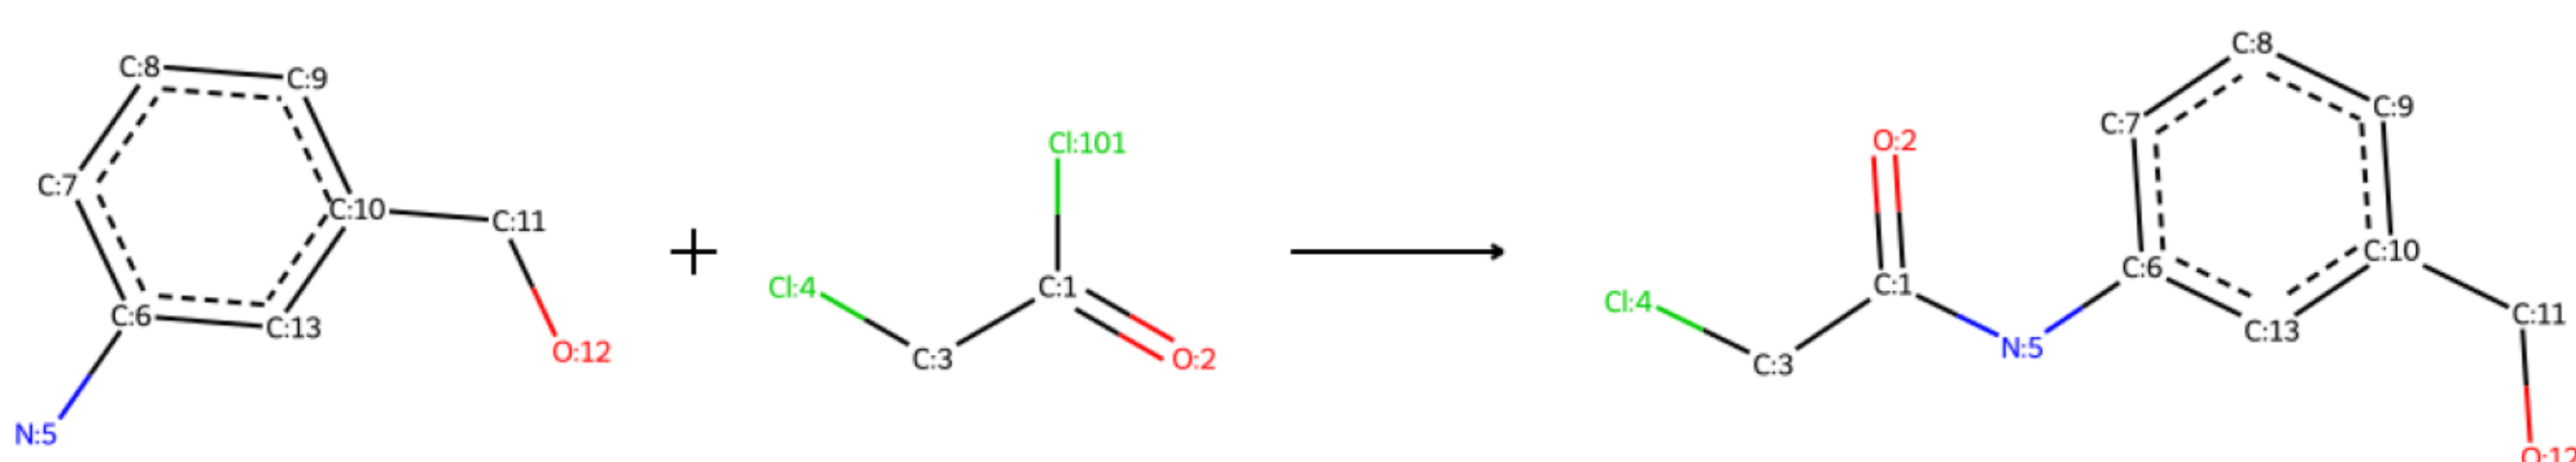

## Proposed mechanistic pathway

[Arrow order: (1) green, (2) blue, (3) red, (4) orange]

step #1

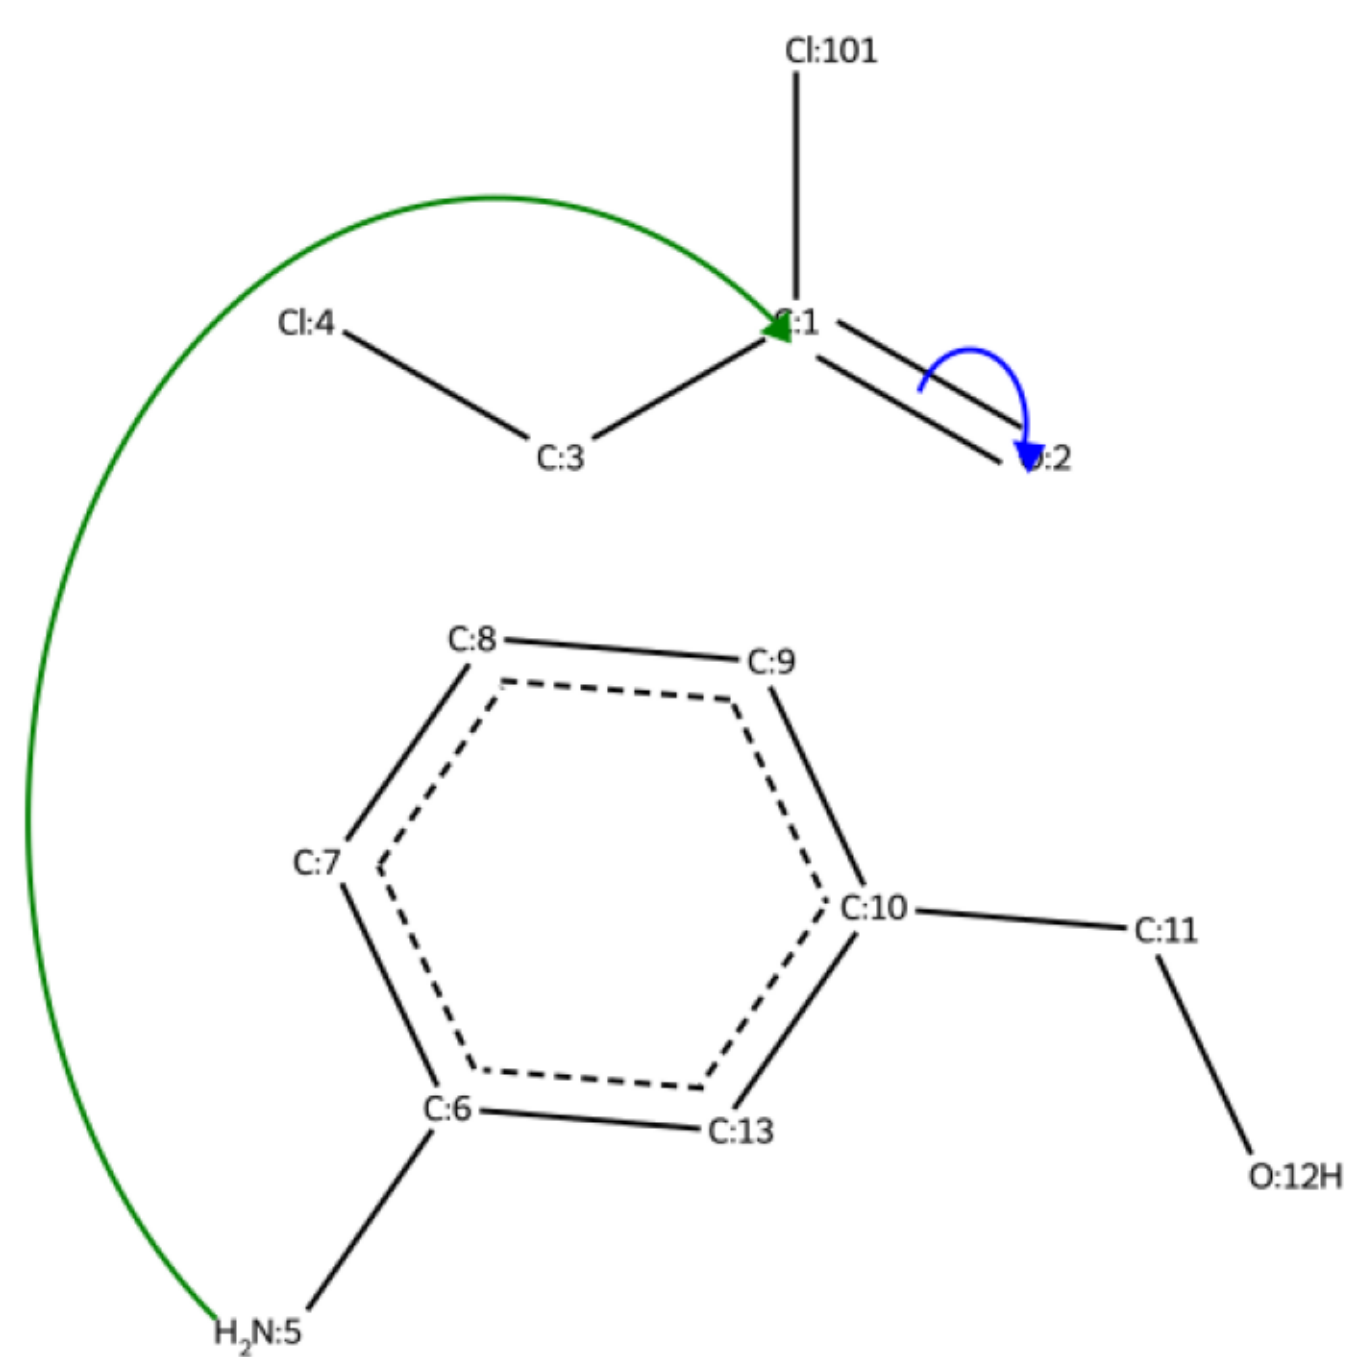

step #2

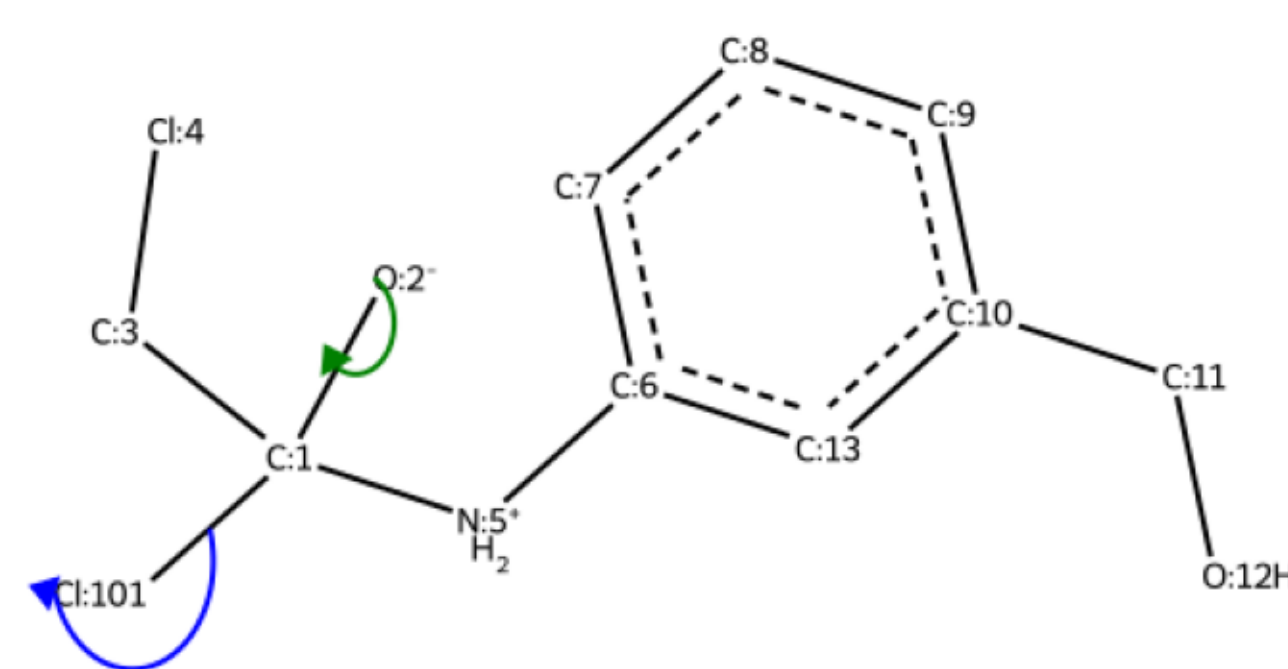

Product(s)

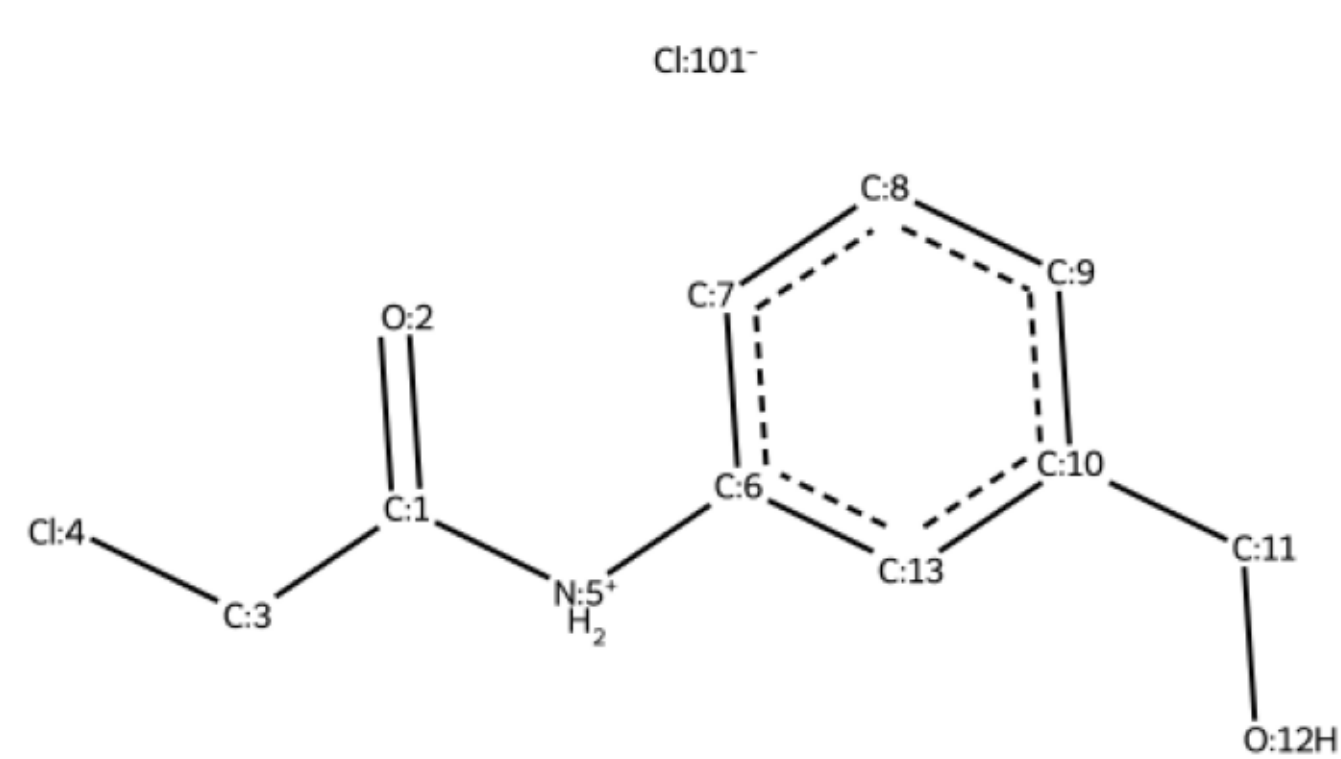

proton transfer

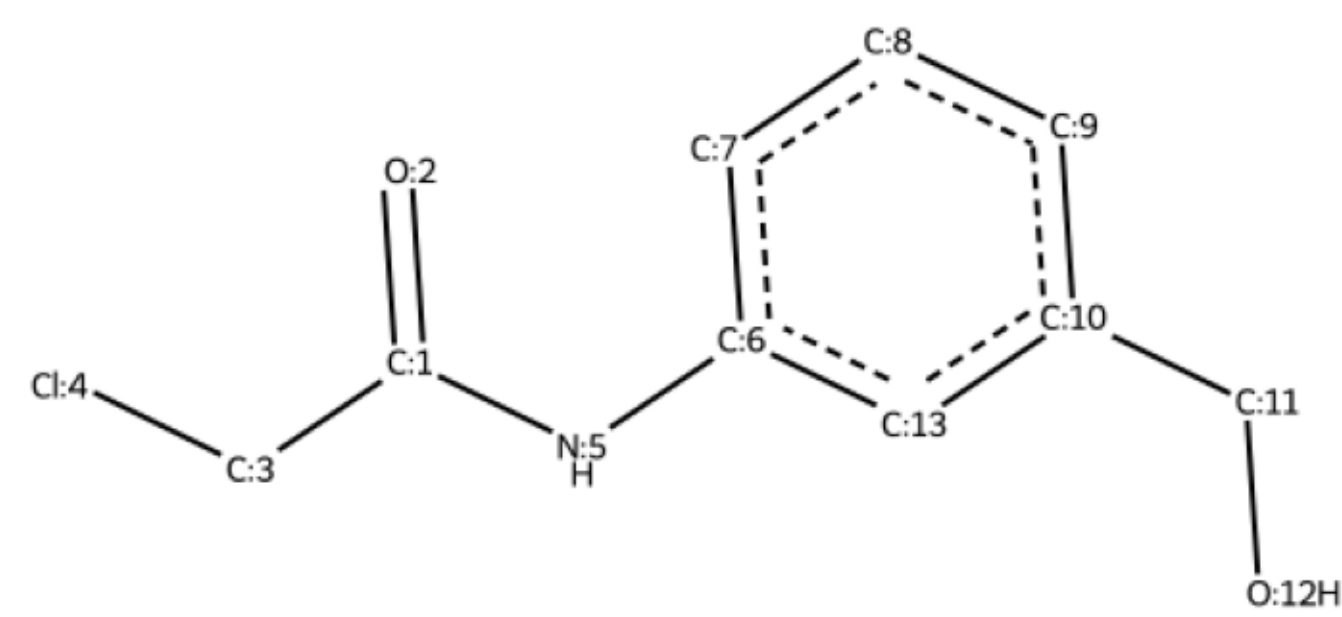

Original reaction  
sampled RXN\_ID:15)

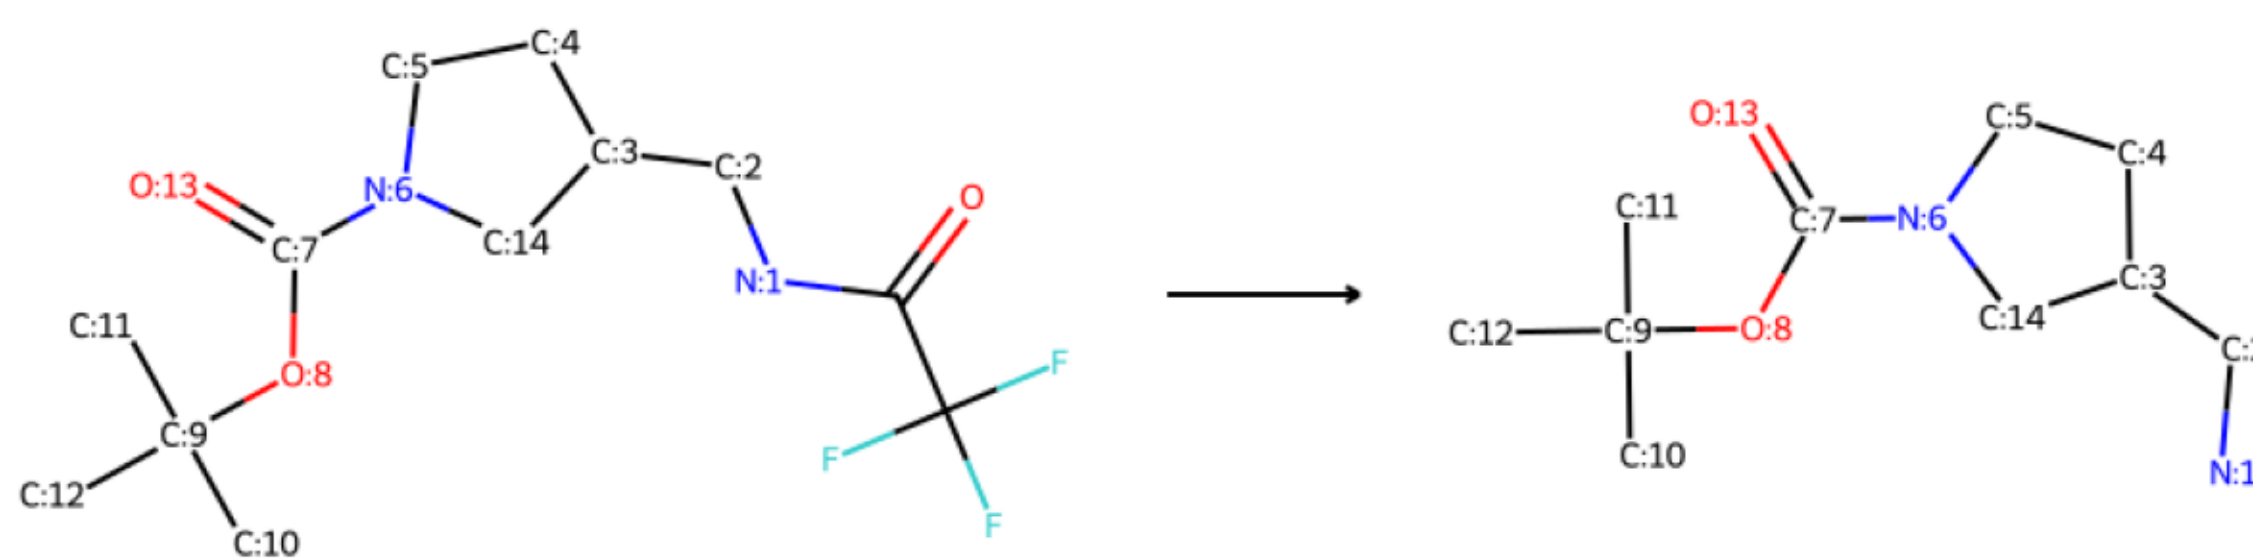

Identified mechanistic class -  
carboxylic\_acid\_derivative\_hydrolysis\_or\_formation reaction

Reaction with missing reagents recovered

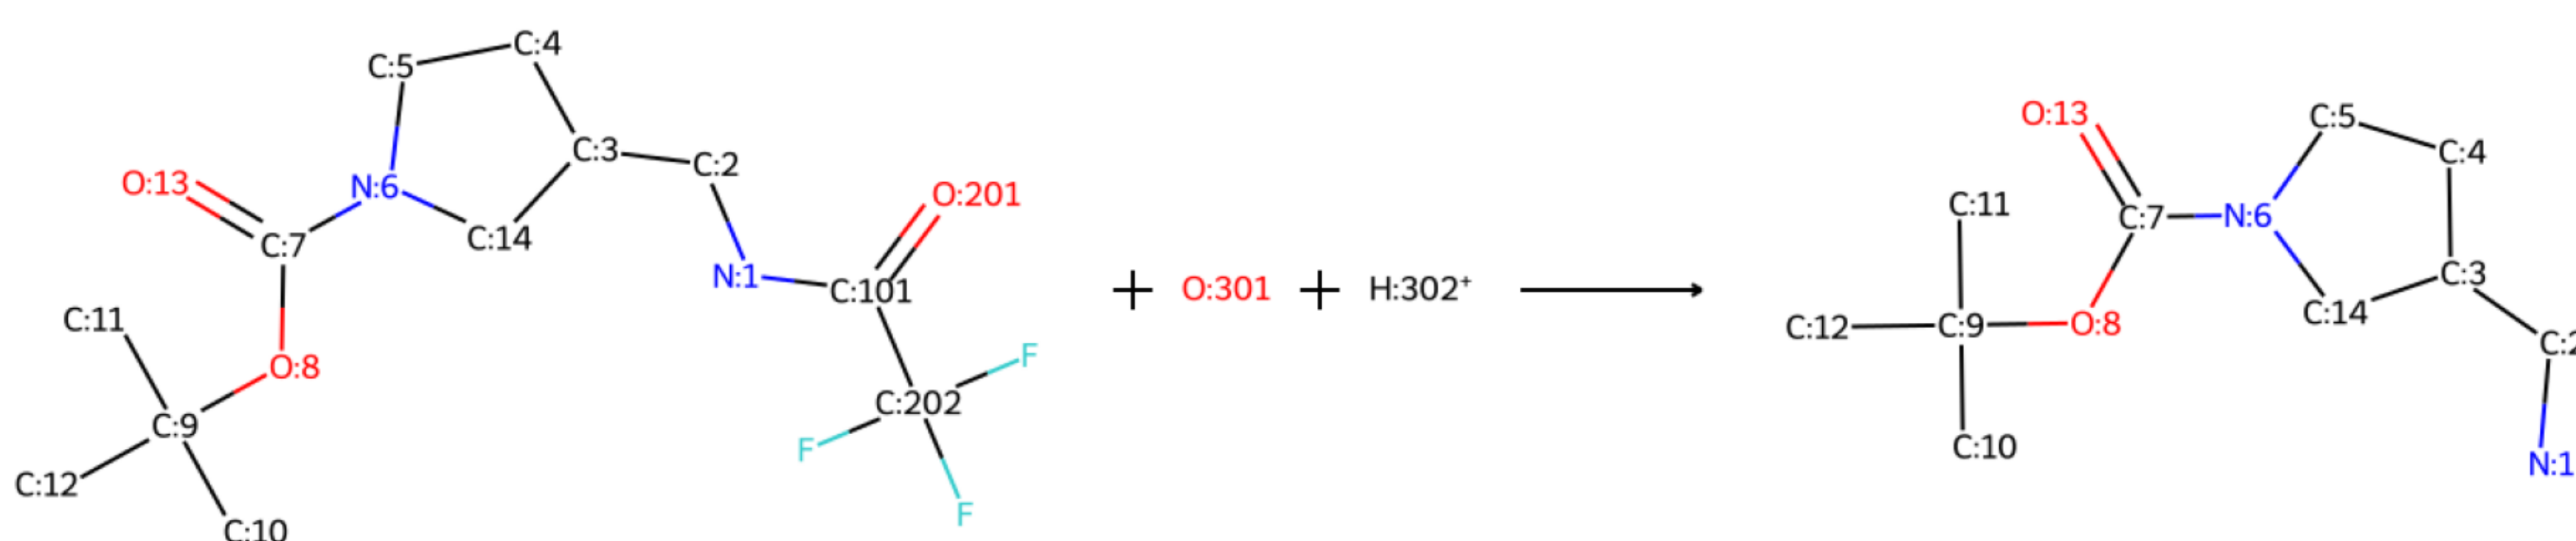

Proposed mechanistic pathway

[Arrow order: (1) green, (2) blue, (3) red, (4) orange]

step #1

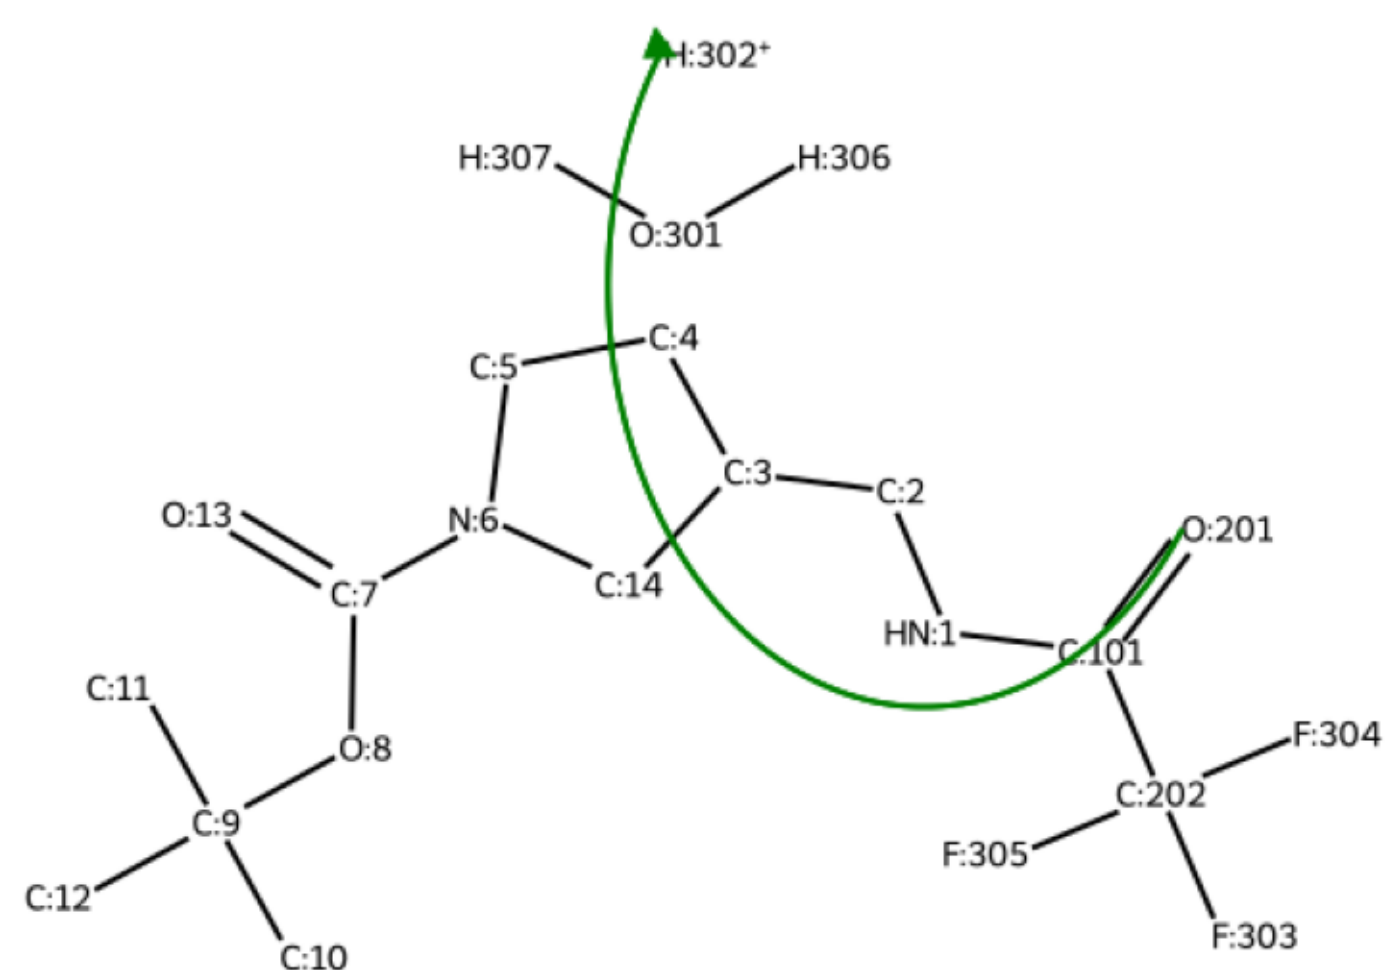

step #2

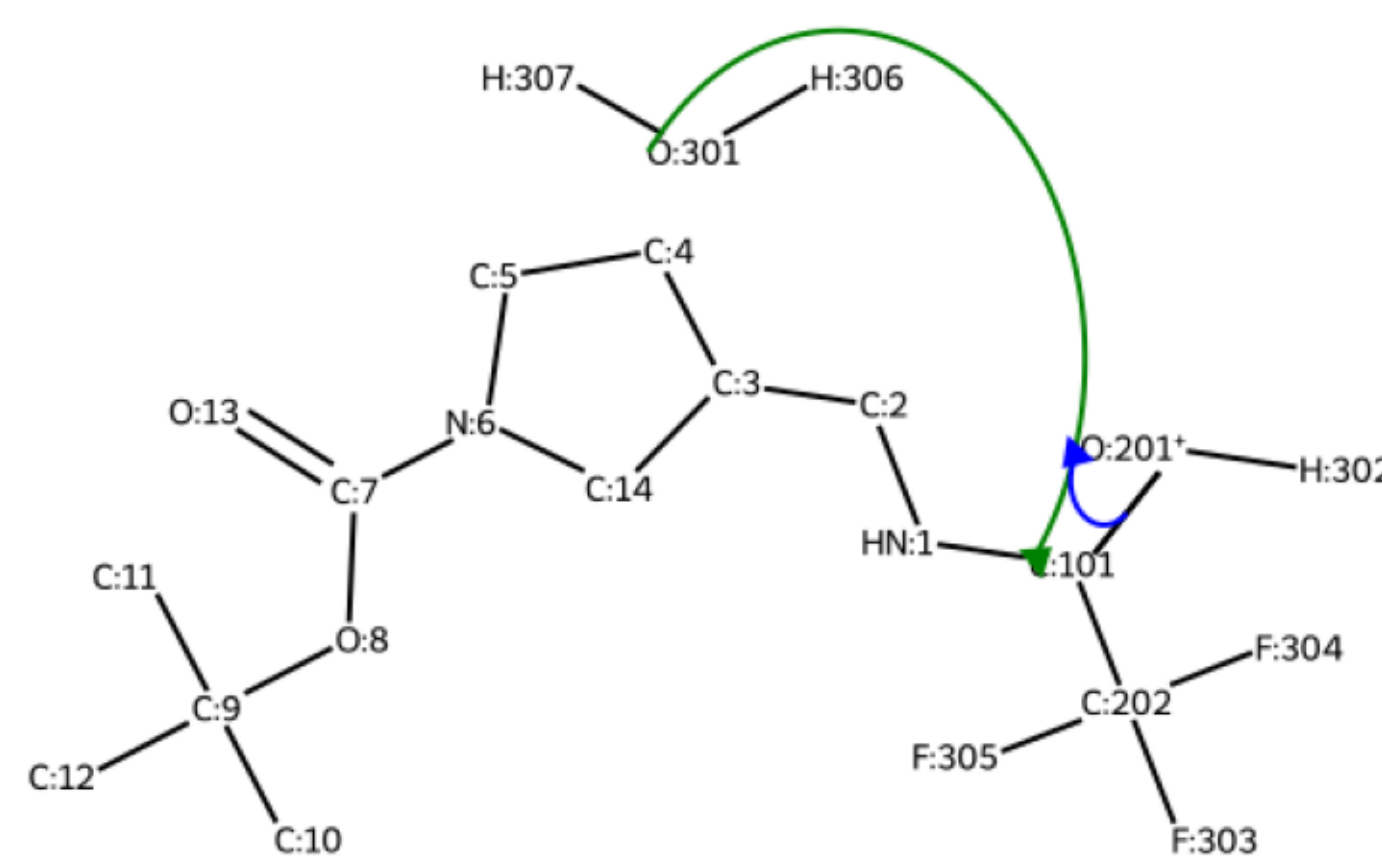

step #3

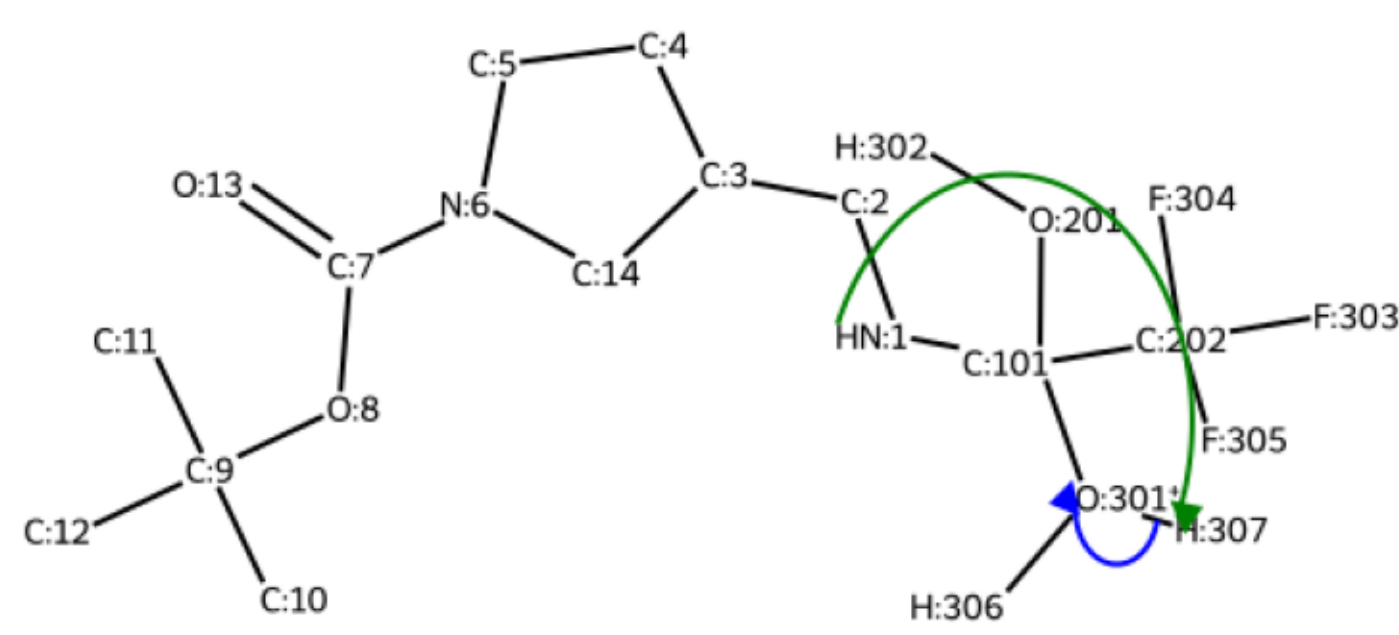

step #4

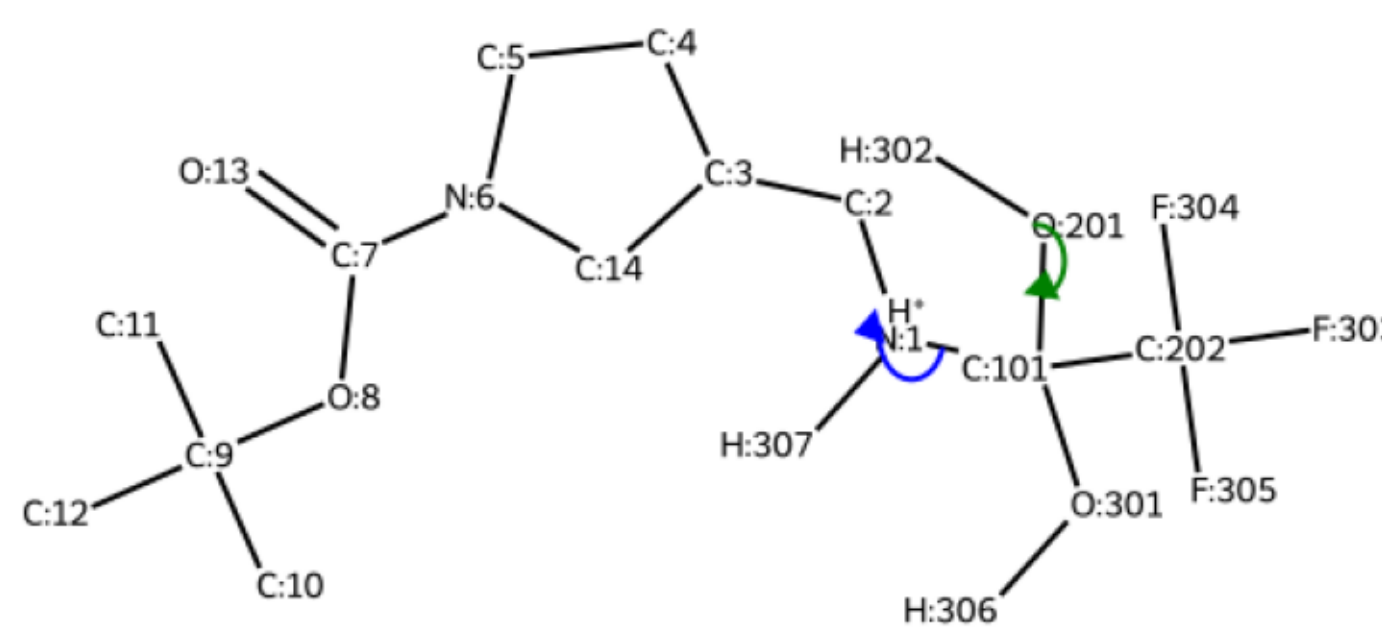

step #5

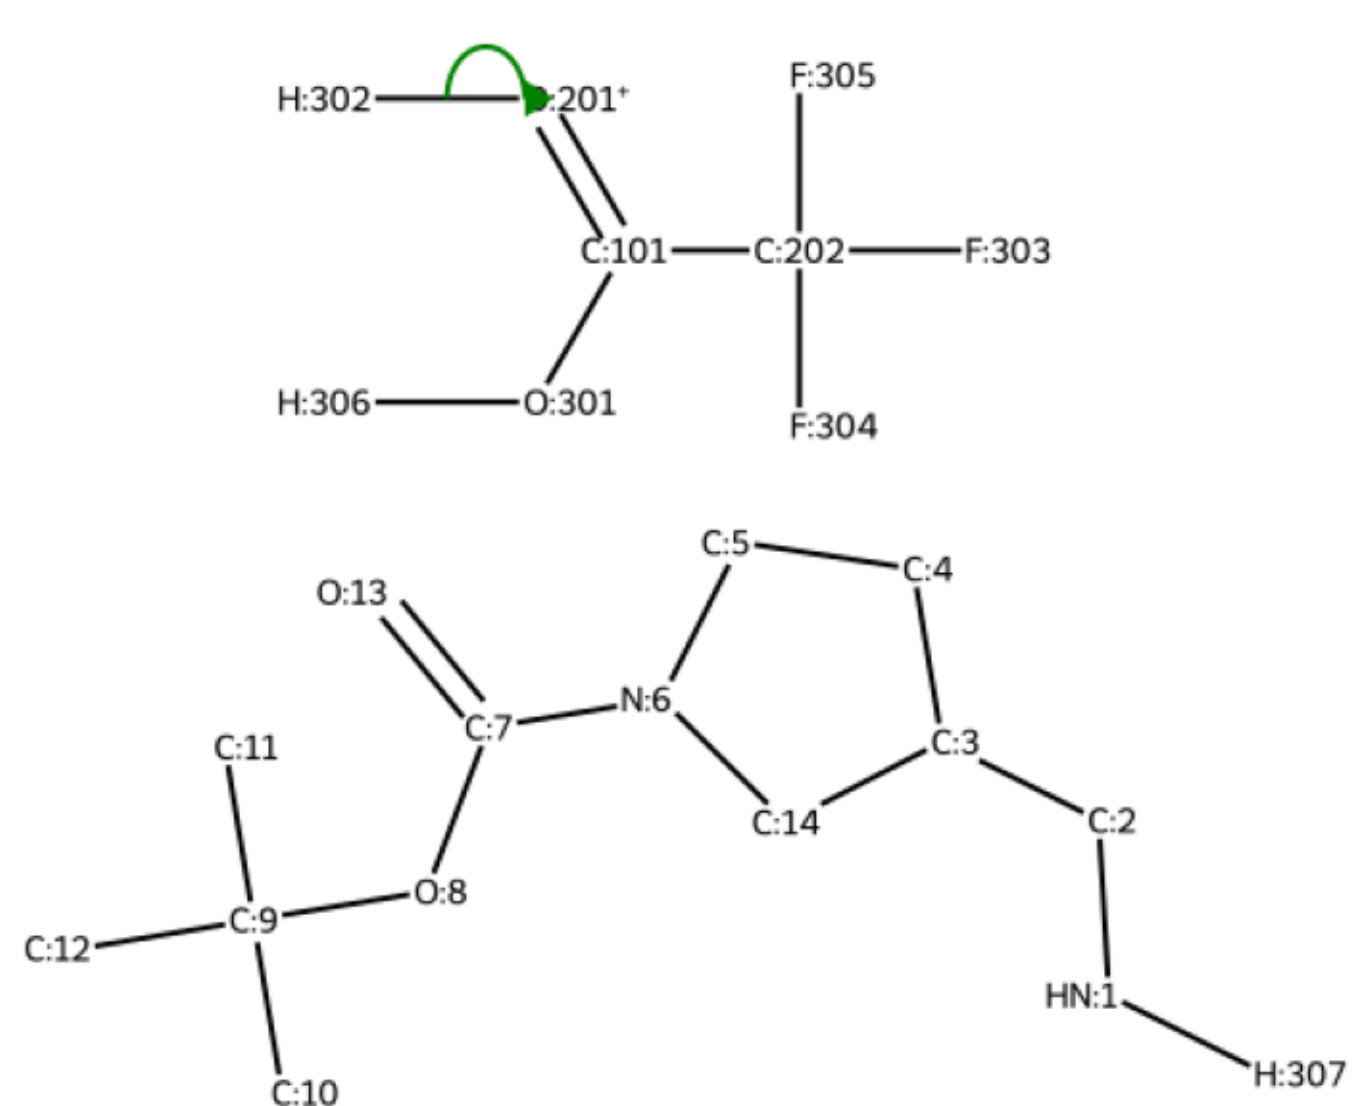

Product(s)

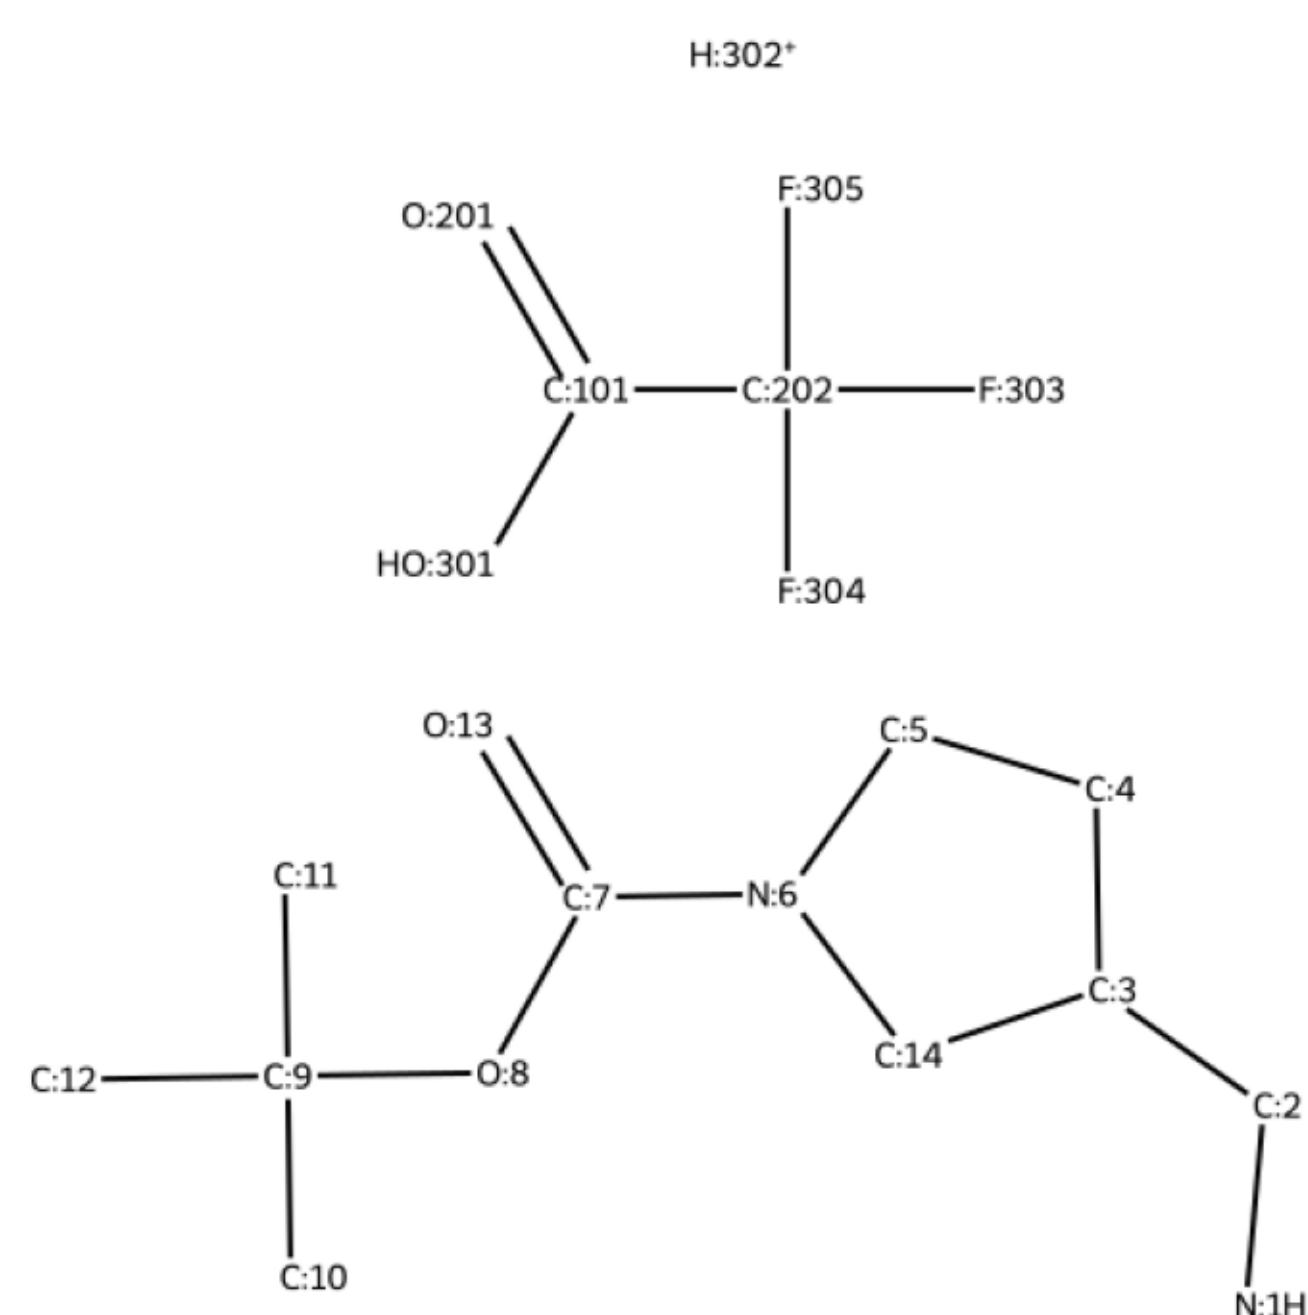



Original reaction  
sampled RXN\_ID:16)

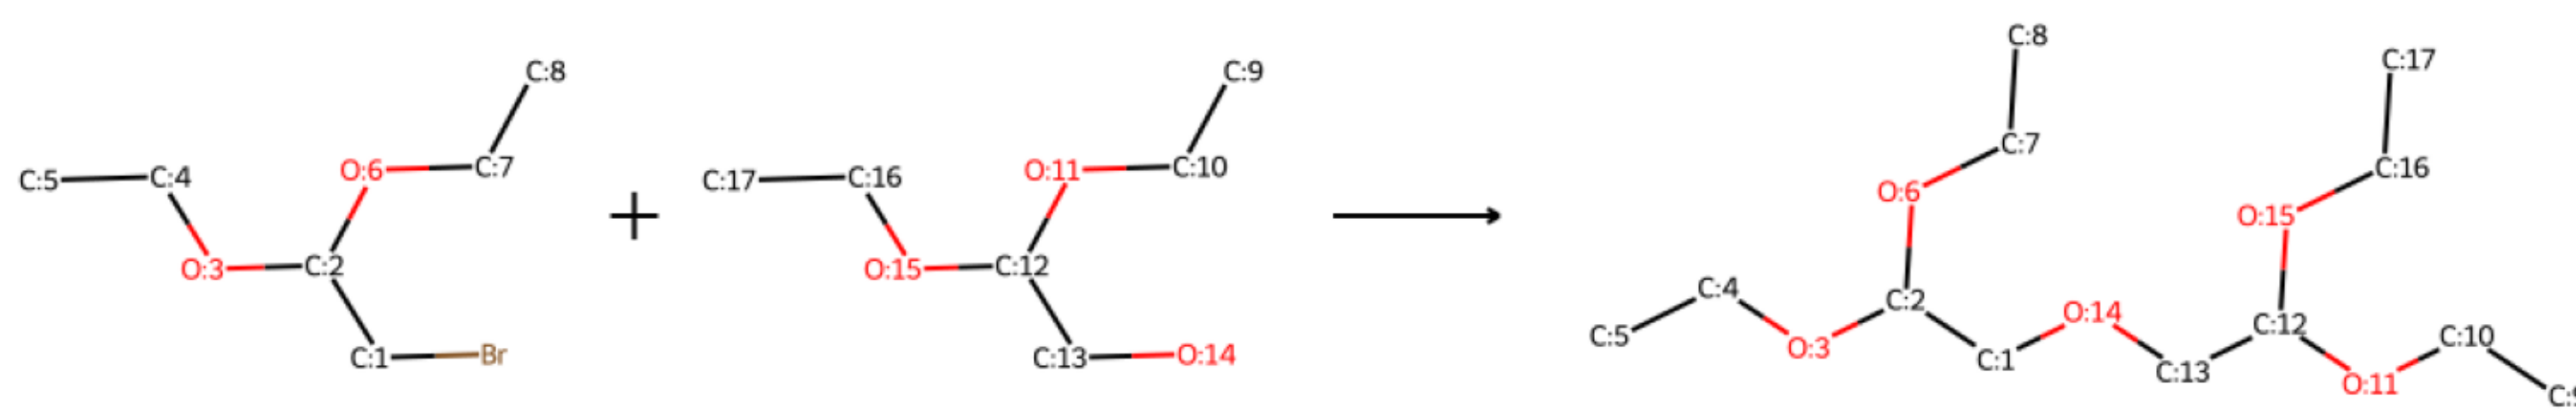

Identified mechanistic class -  
SN2\_alcohol(thiol) reaction

Reaction with missing reagents recovered

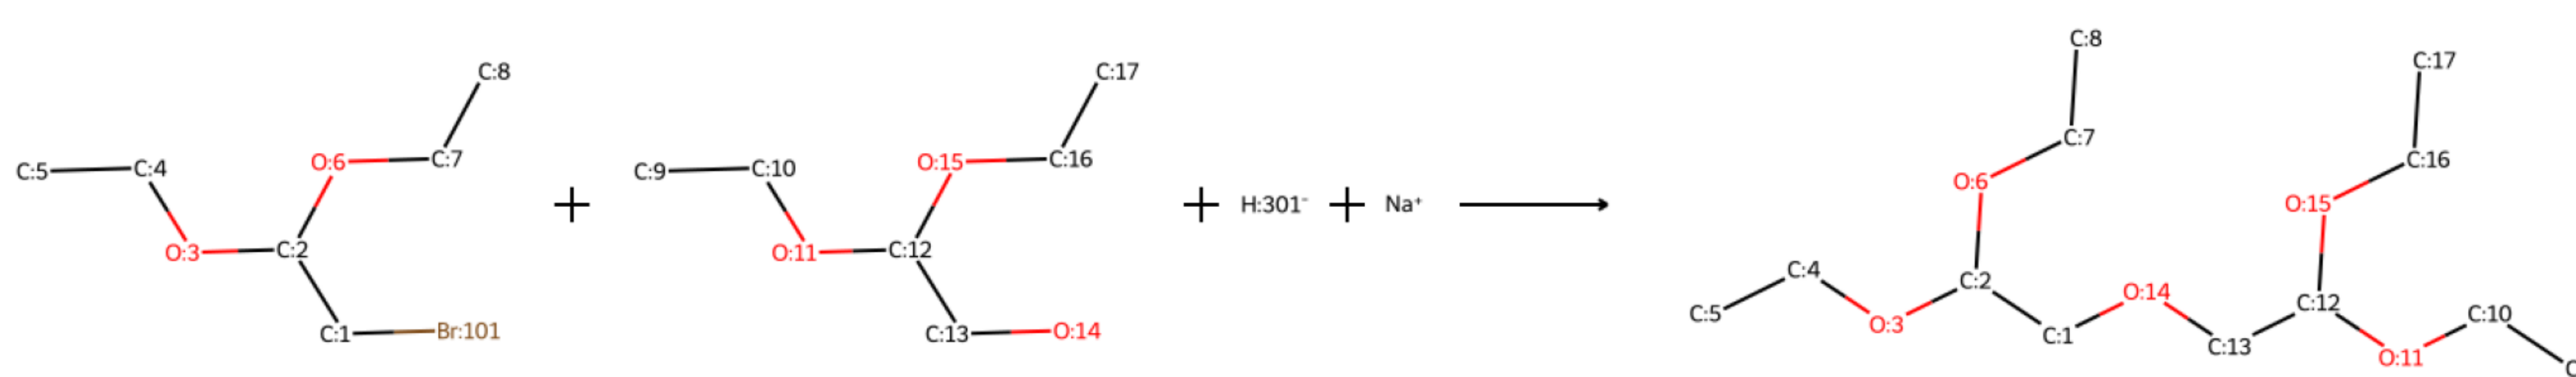

Proposed mechanistic pathway

[Arrow order: (1) green, (2) blue, (3) red, (4) orange]

step #1

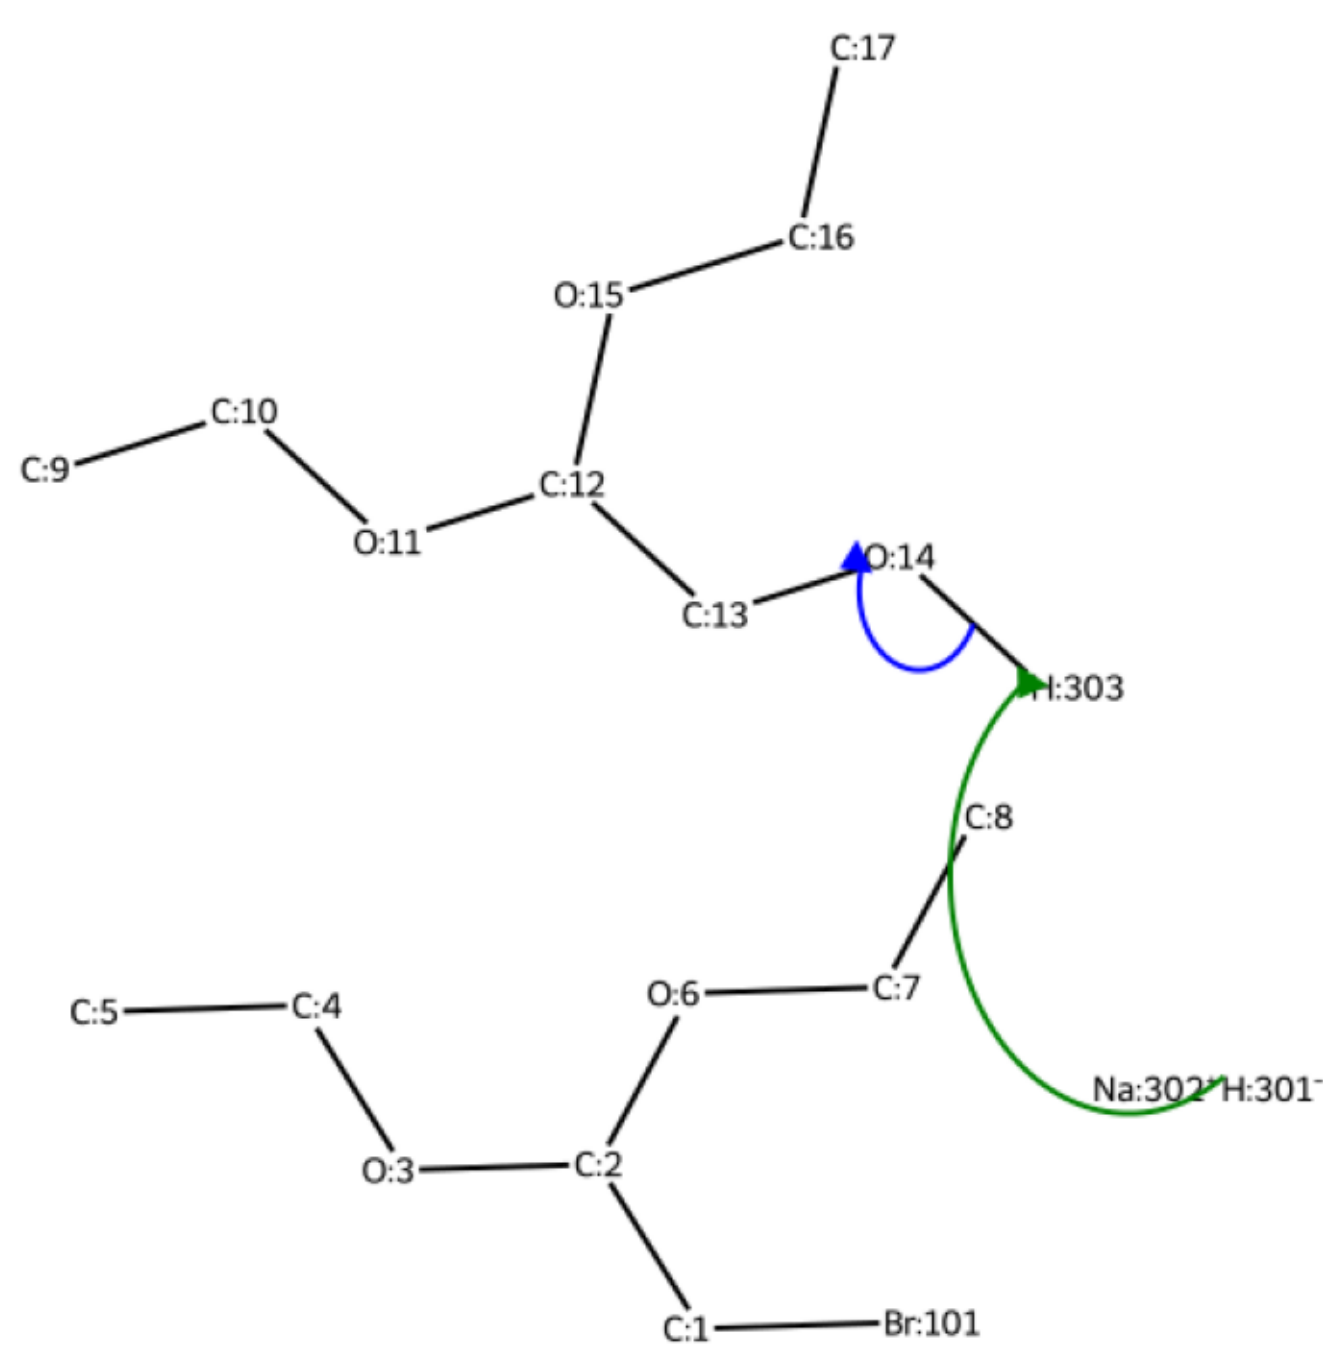

step #2

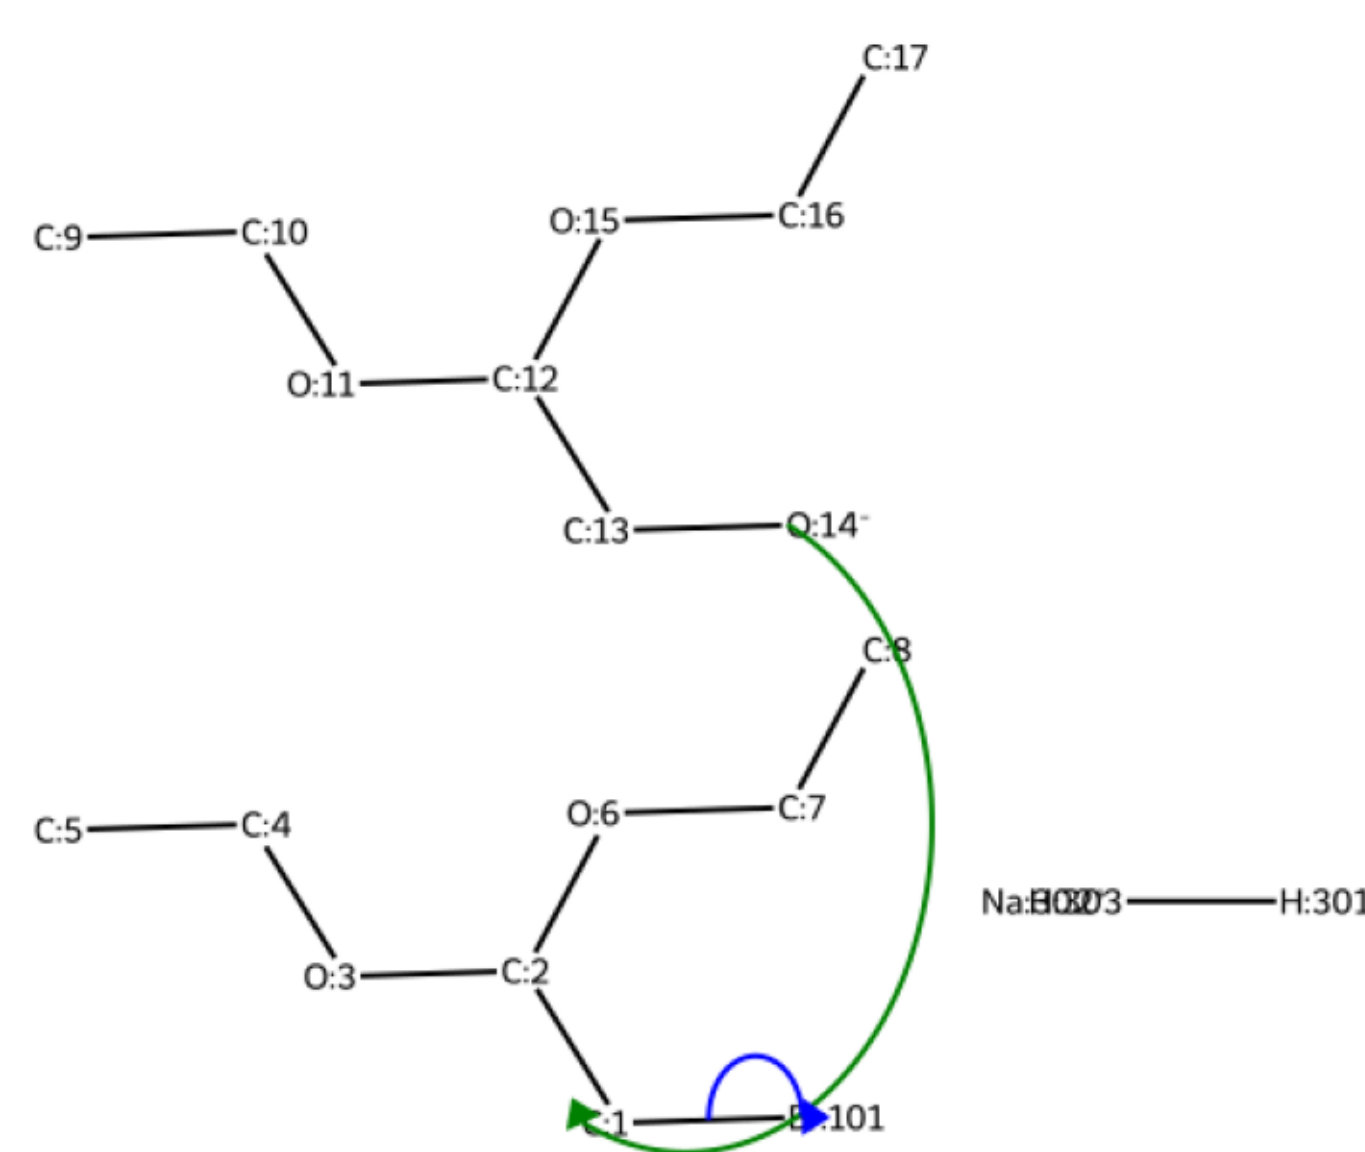

Product(s)

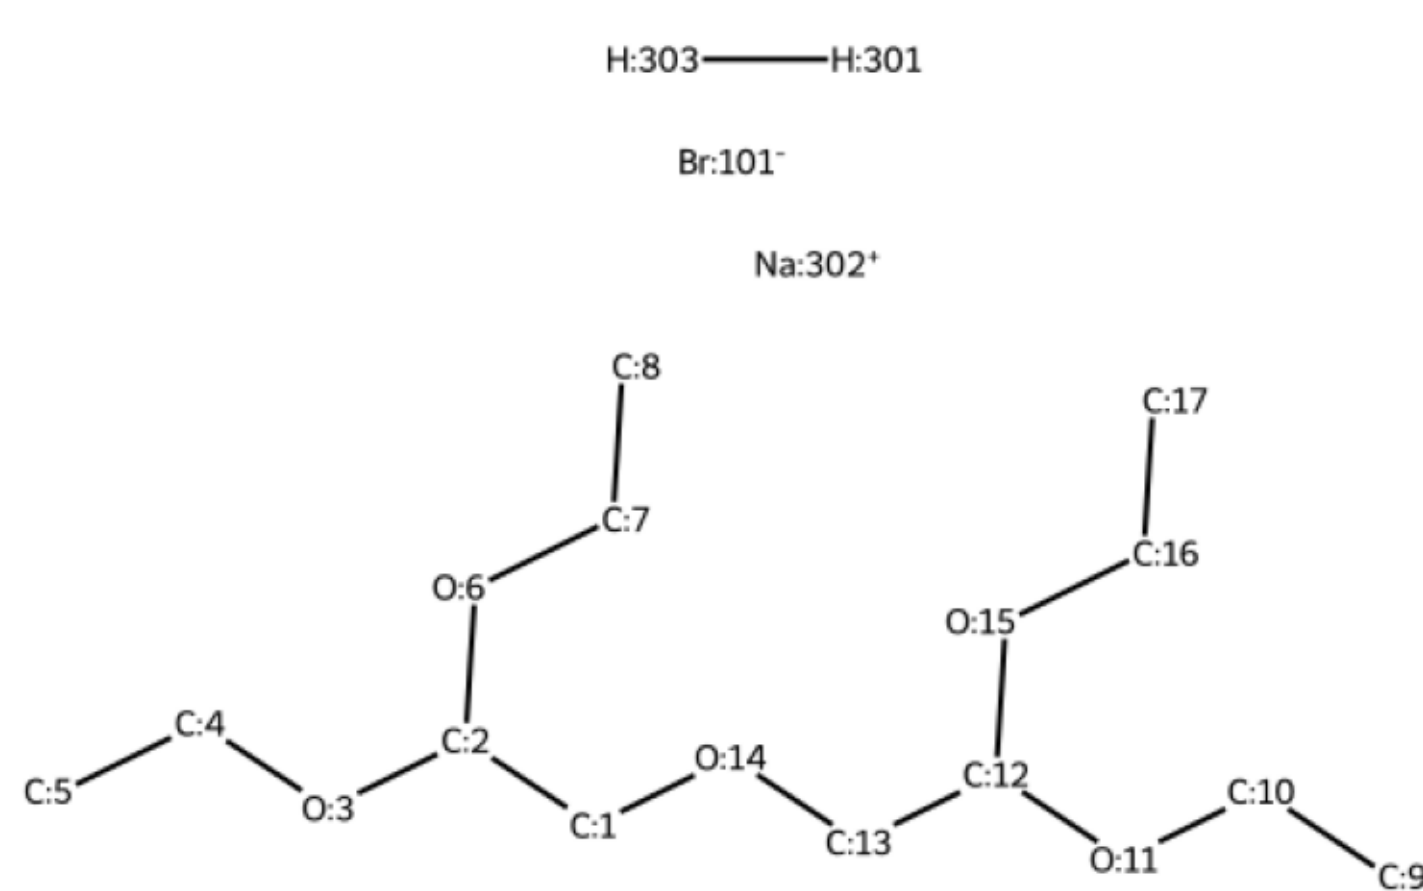

Original reaction  
sampled RXN\_ID:17)

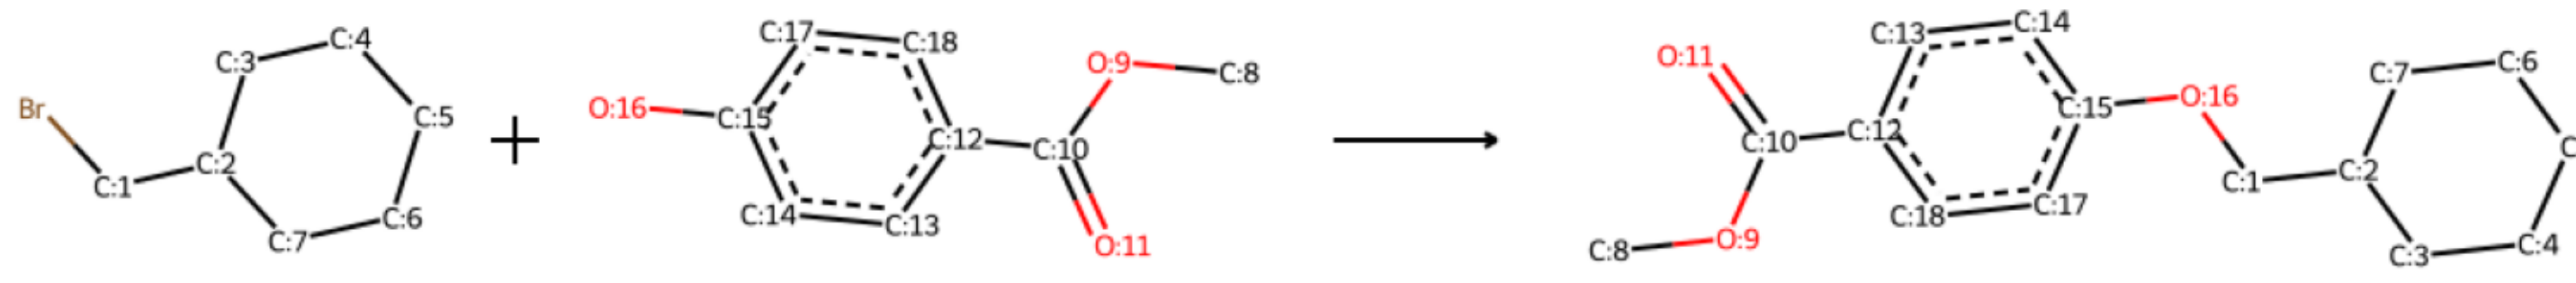

Identified mechanistic class -  
SN2\_alcohol(thiol) reaction

Reaction with missing reagents recovered

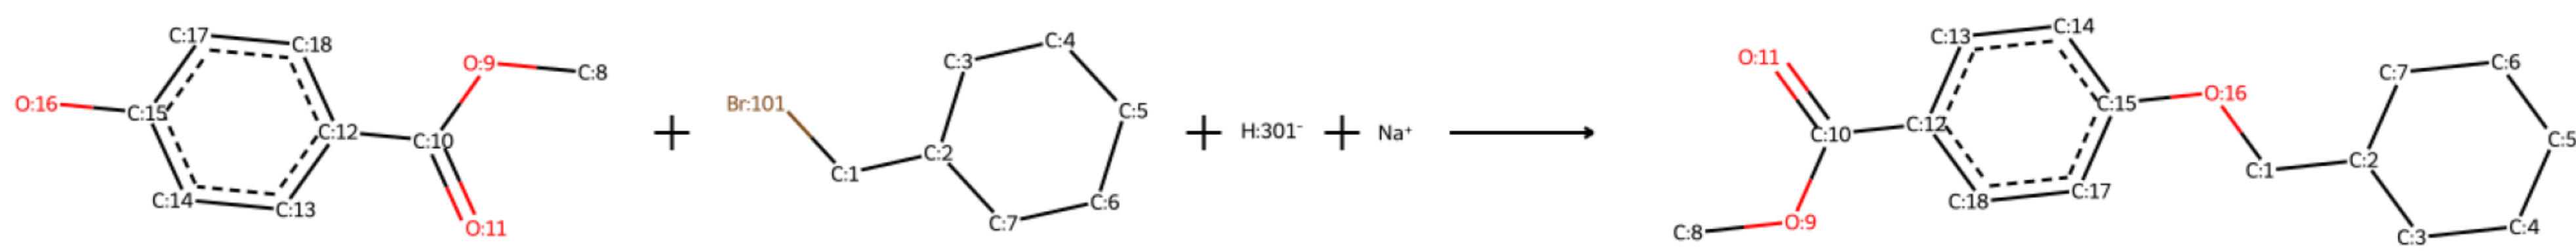

Proposed mechanistic pathway

[Arrow order: (1) green, (2) blue, (3) red, (4) orange]

step #1

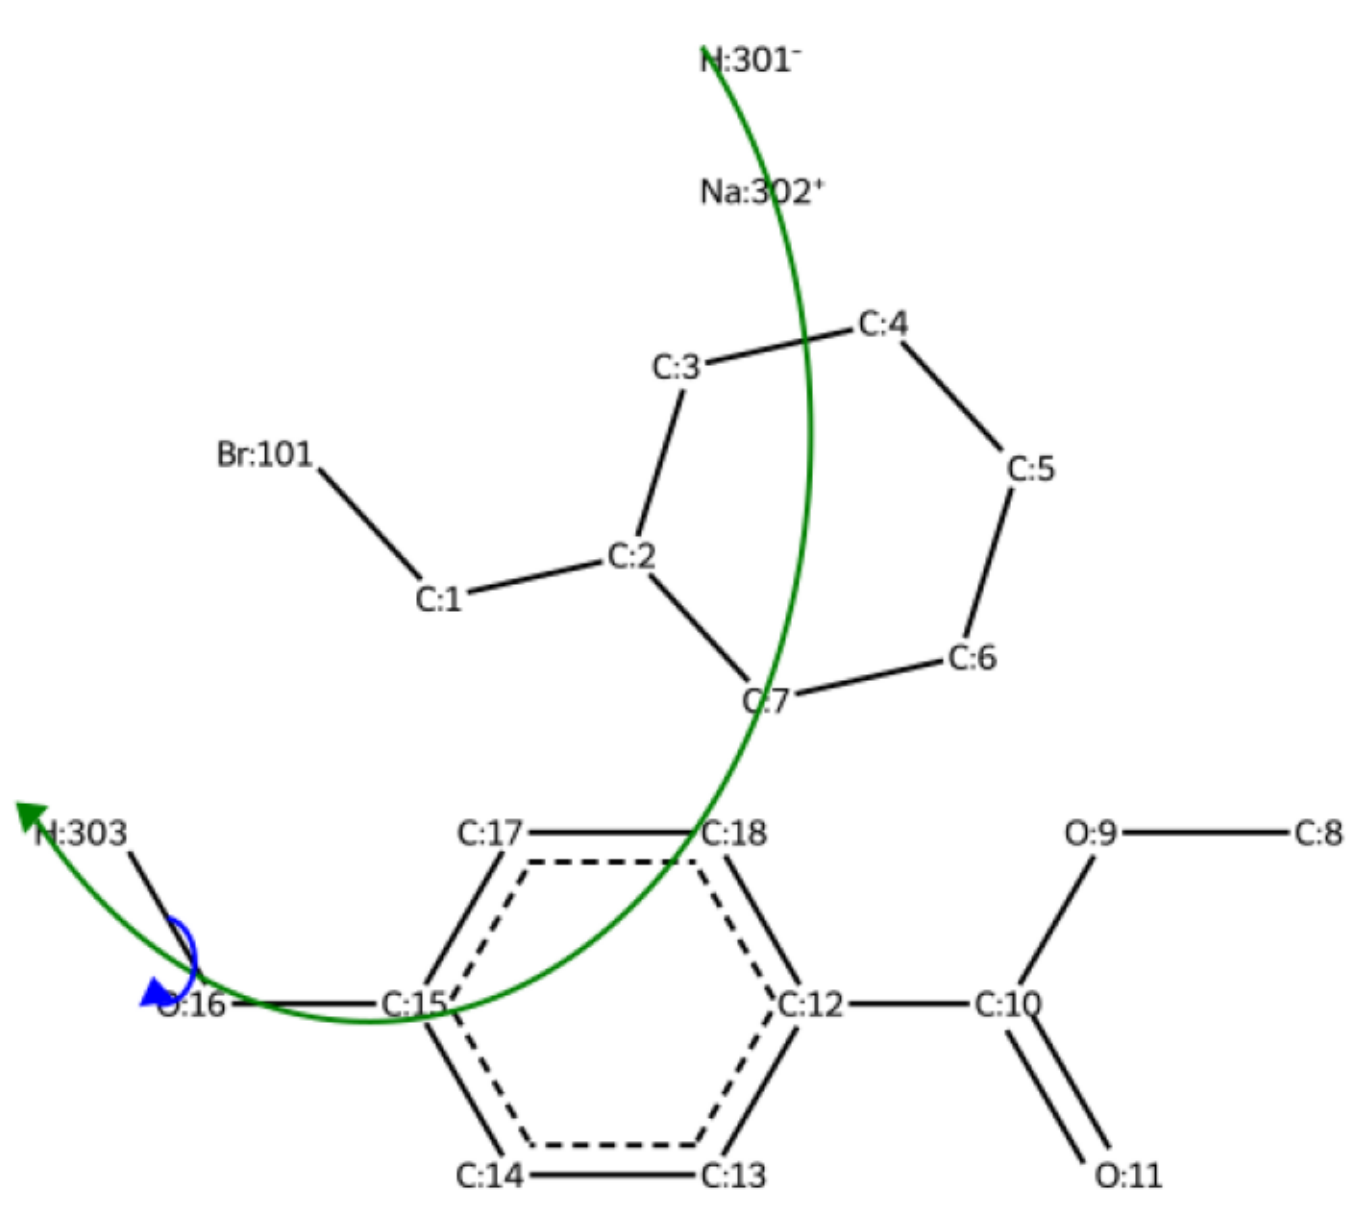

step #2

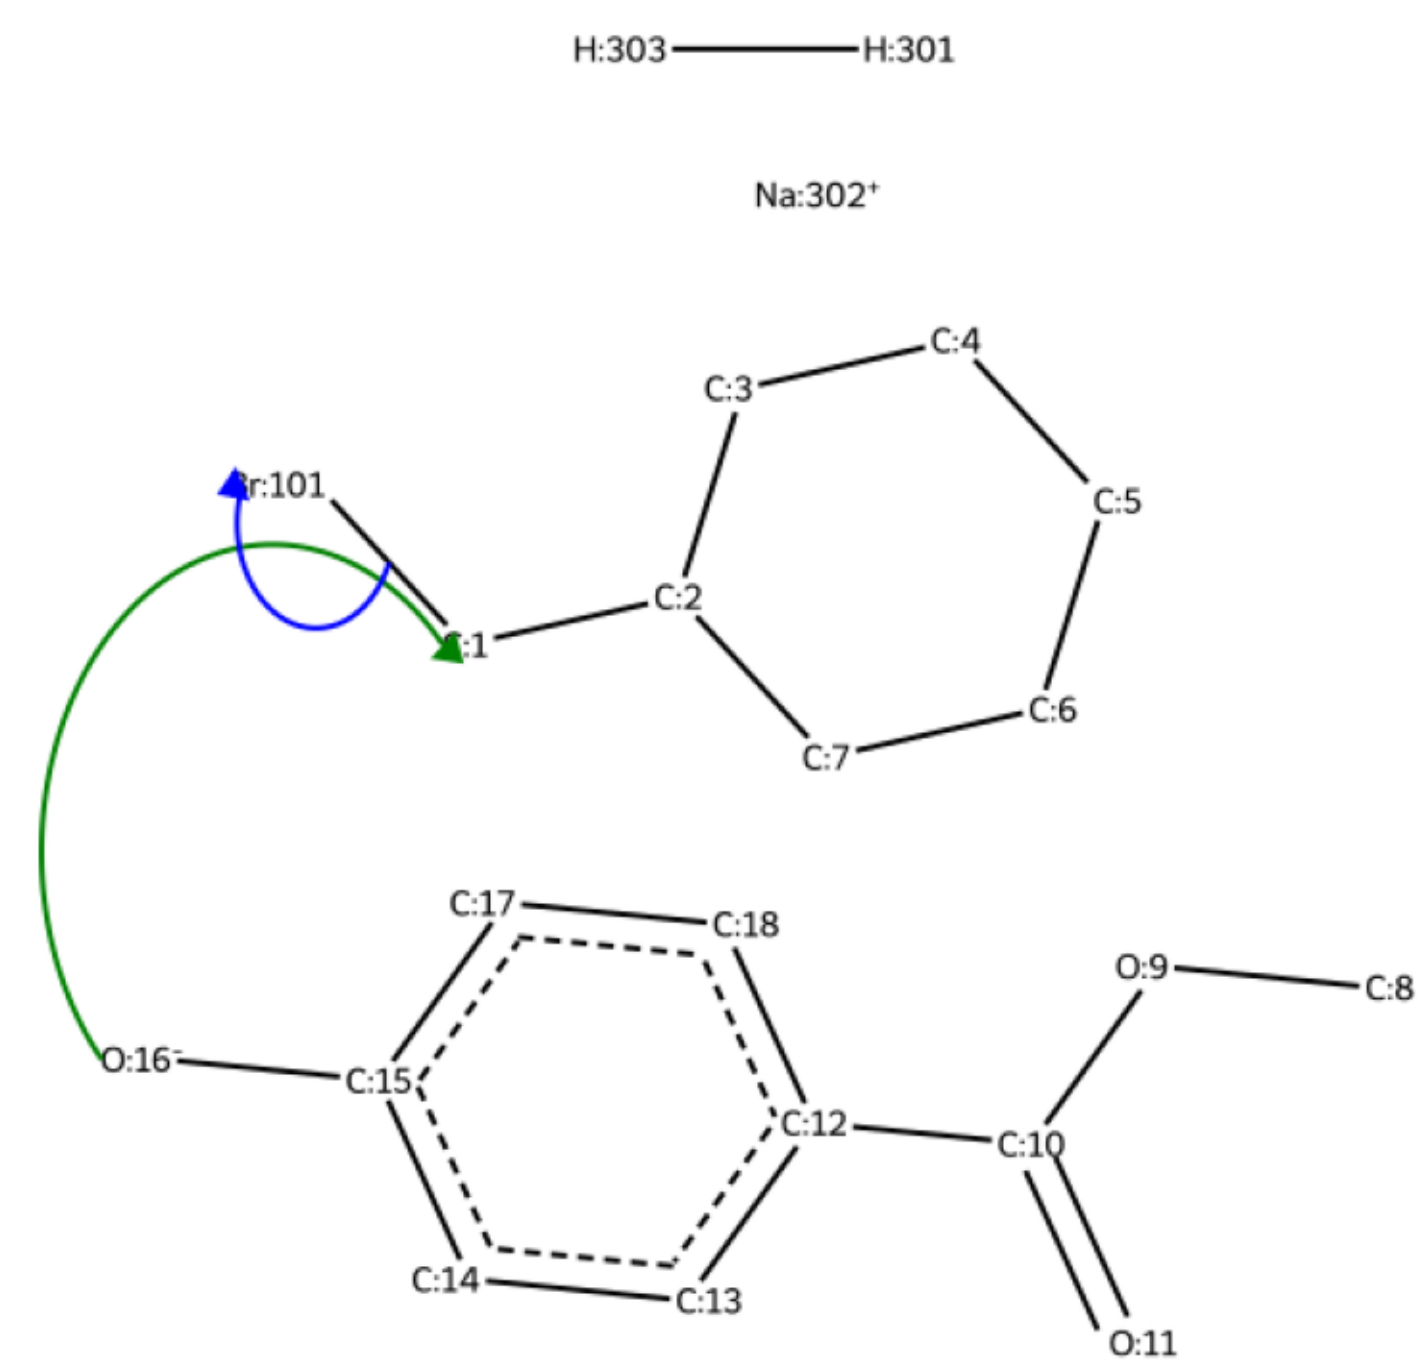

Product(s)

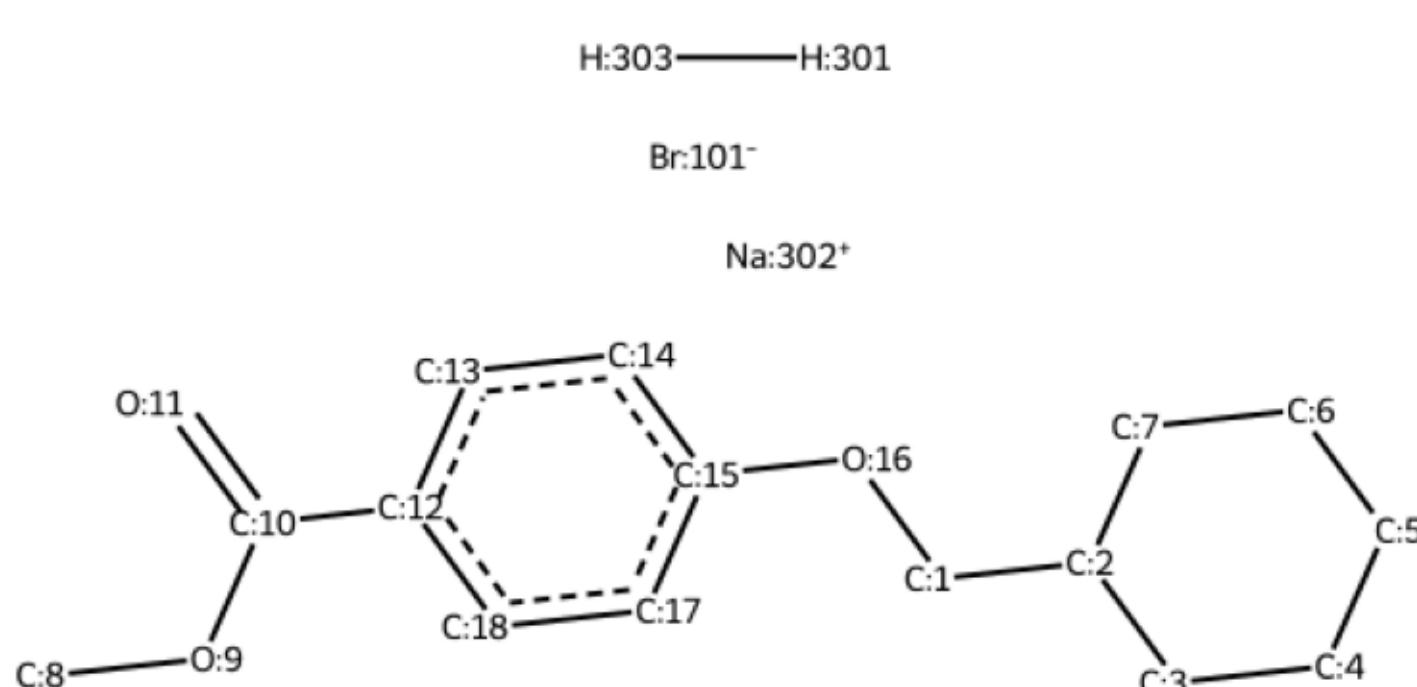



Original reaction  
sampled RXN\_ID:18)

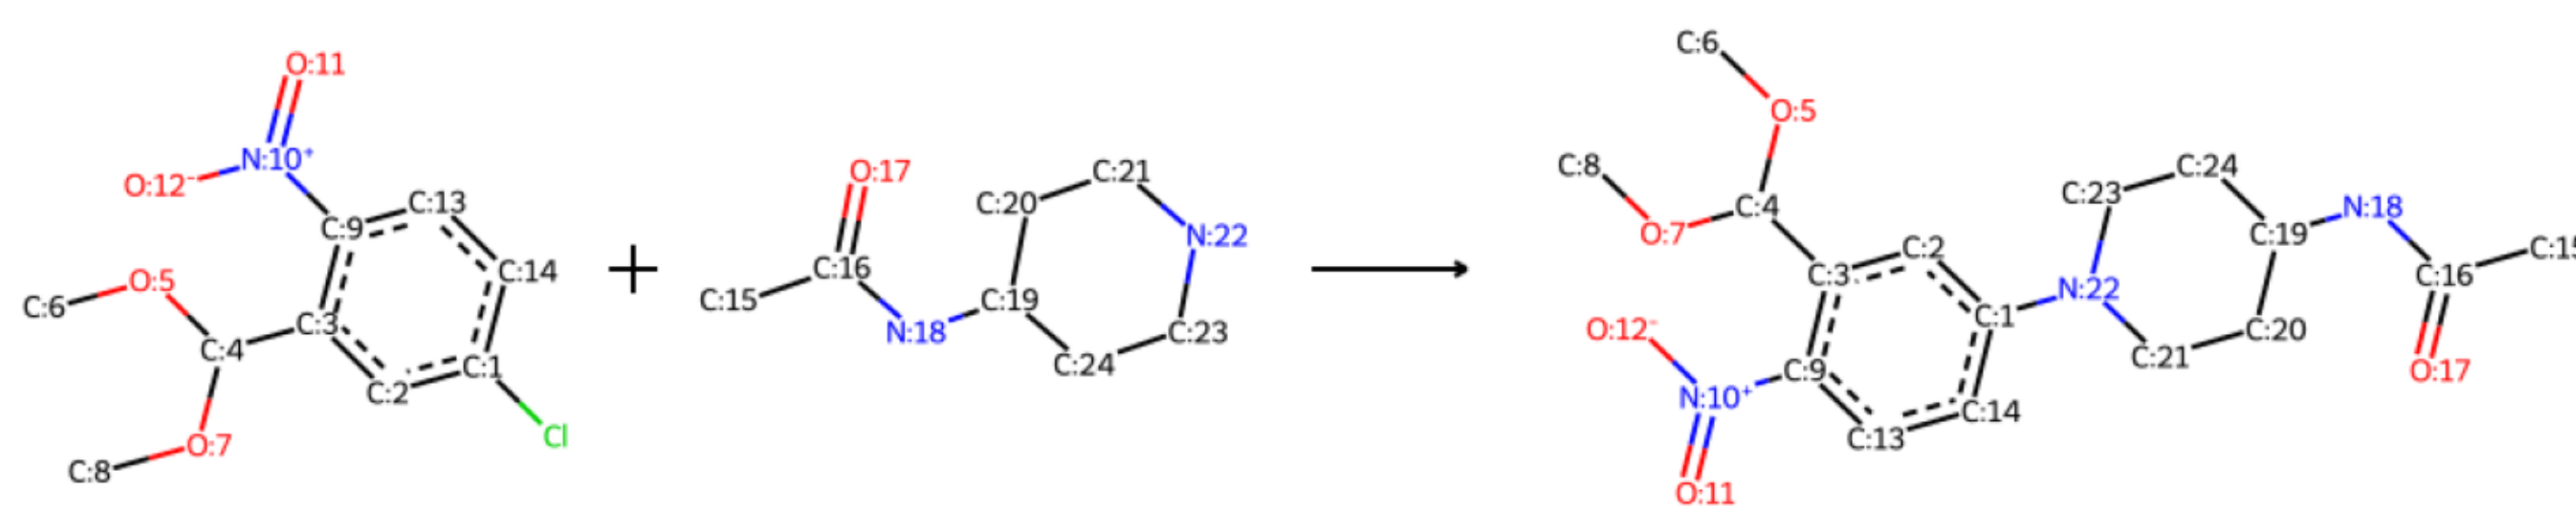

Identified mechanistic class -  
S<sub>N</sub>Ar(para) reaction

Reaction with missing reagents recovered

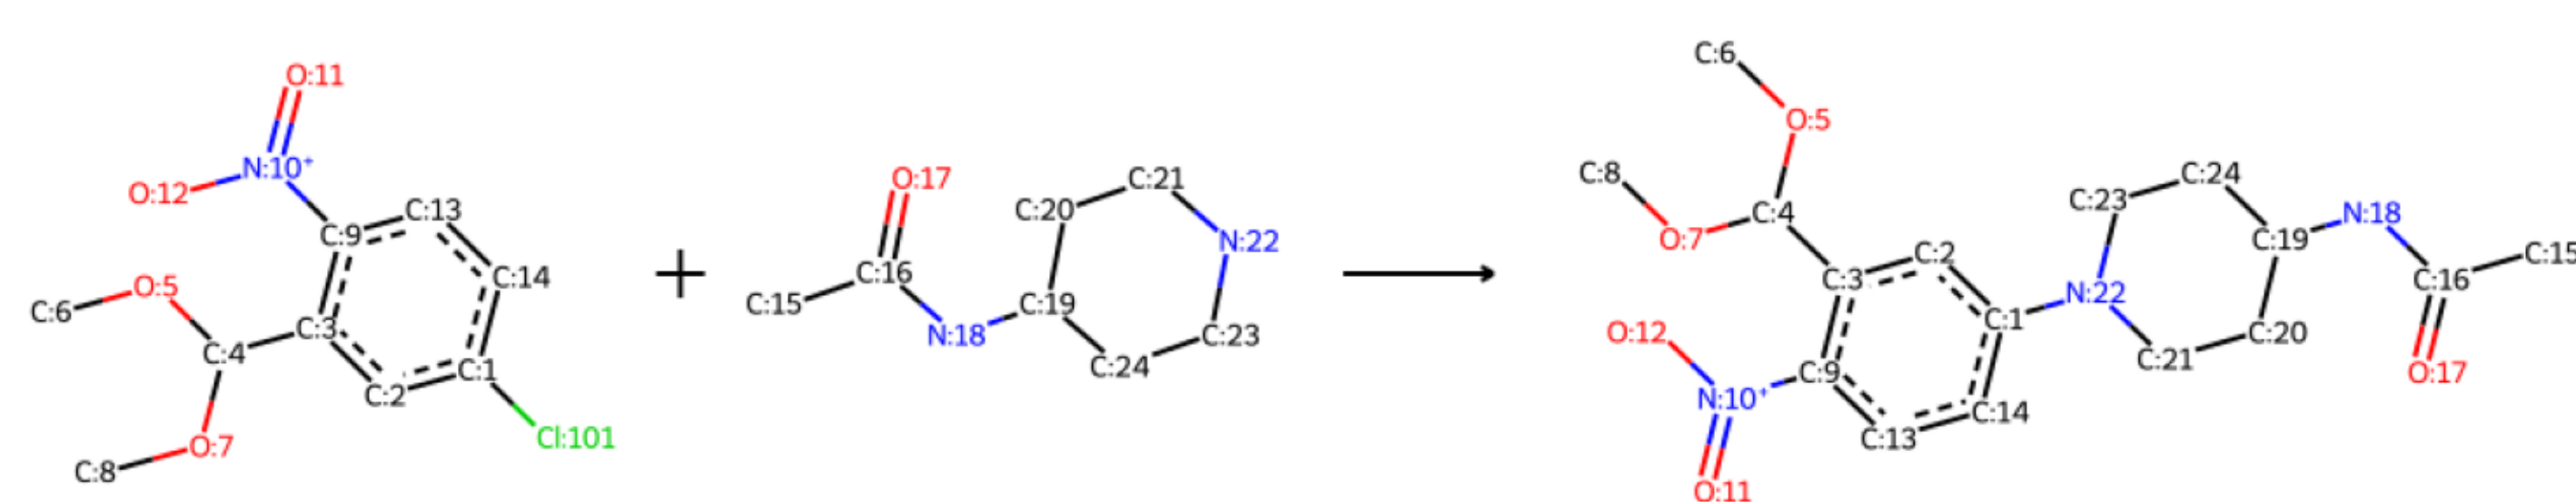

Proposed mechanistic pathway

[Arrow order: (1) green, (2) blue, (3) red, (4) orange]

step #1

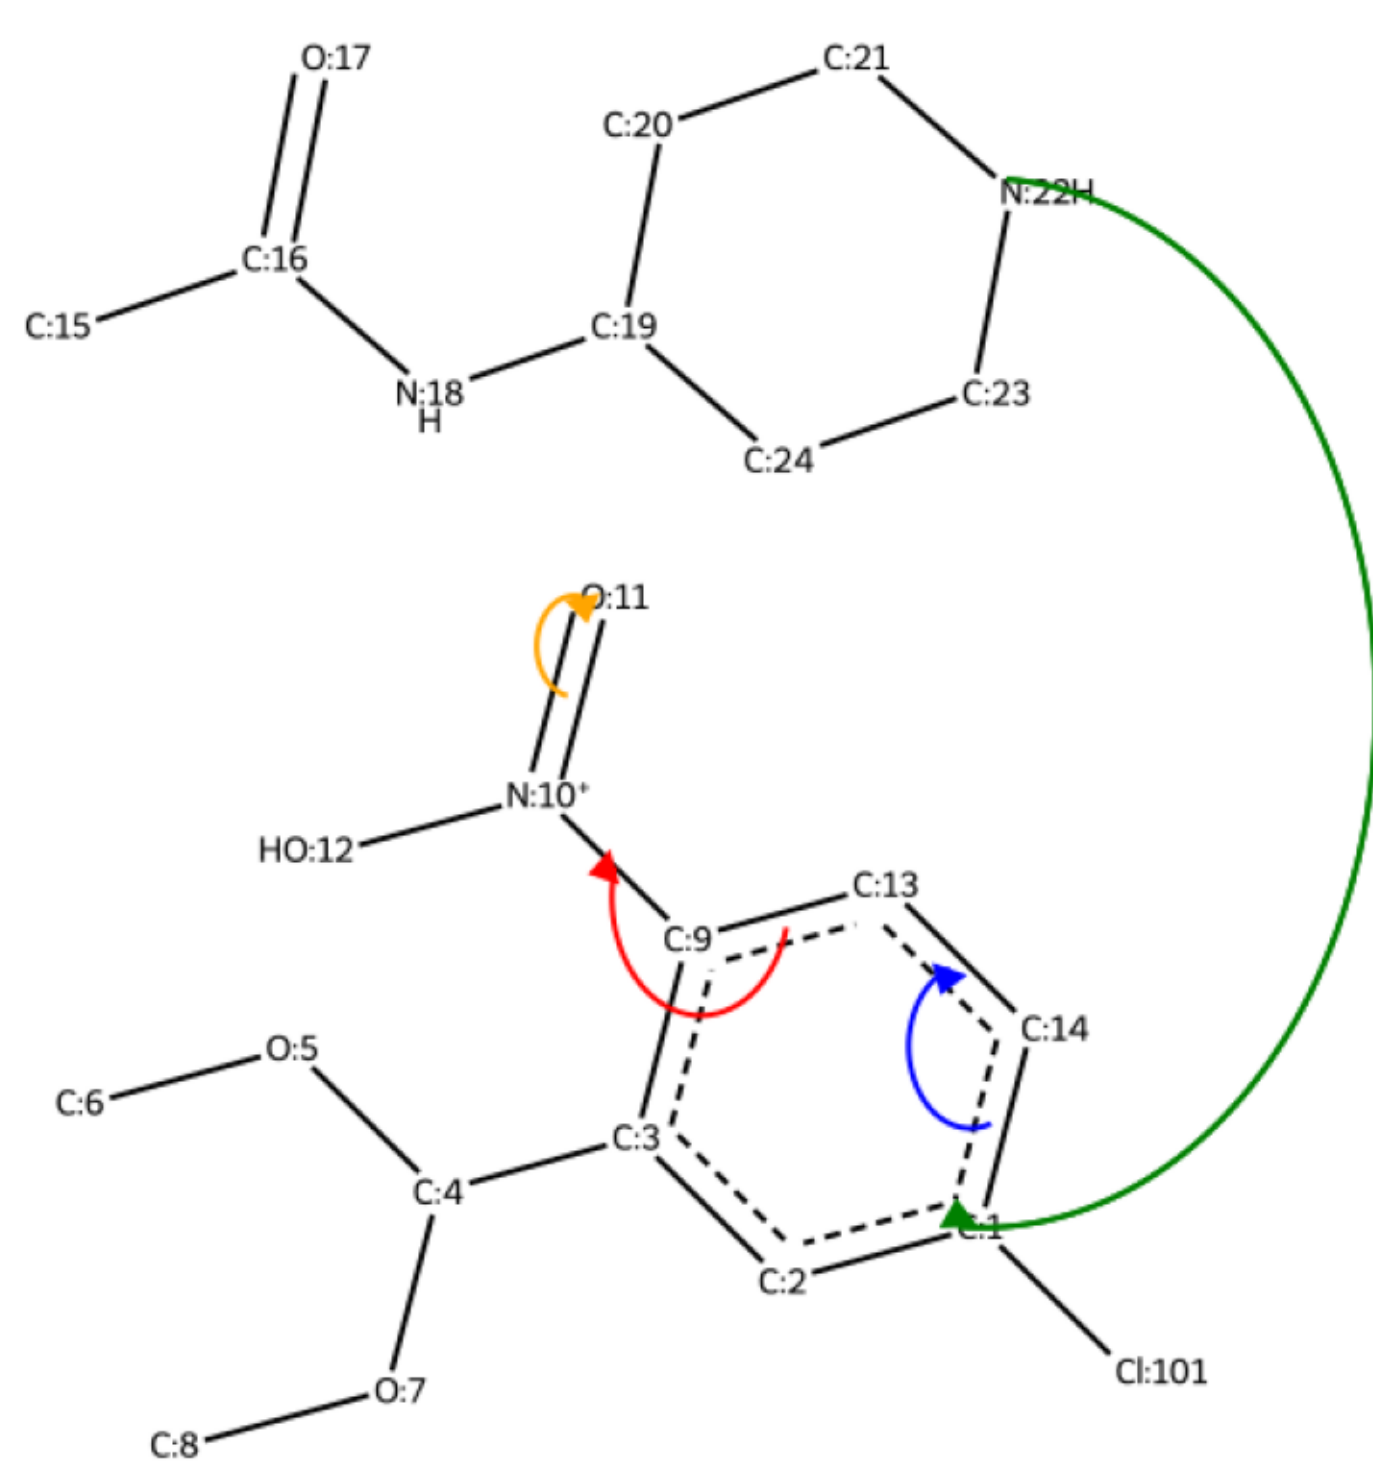

step #2

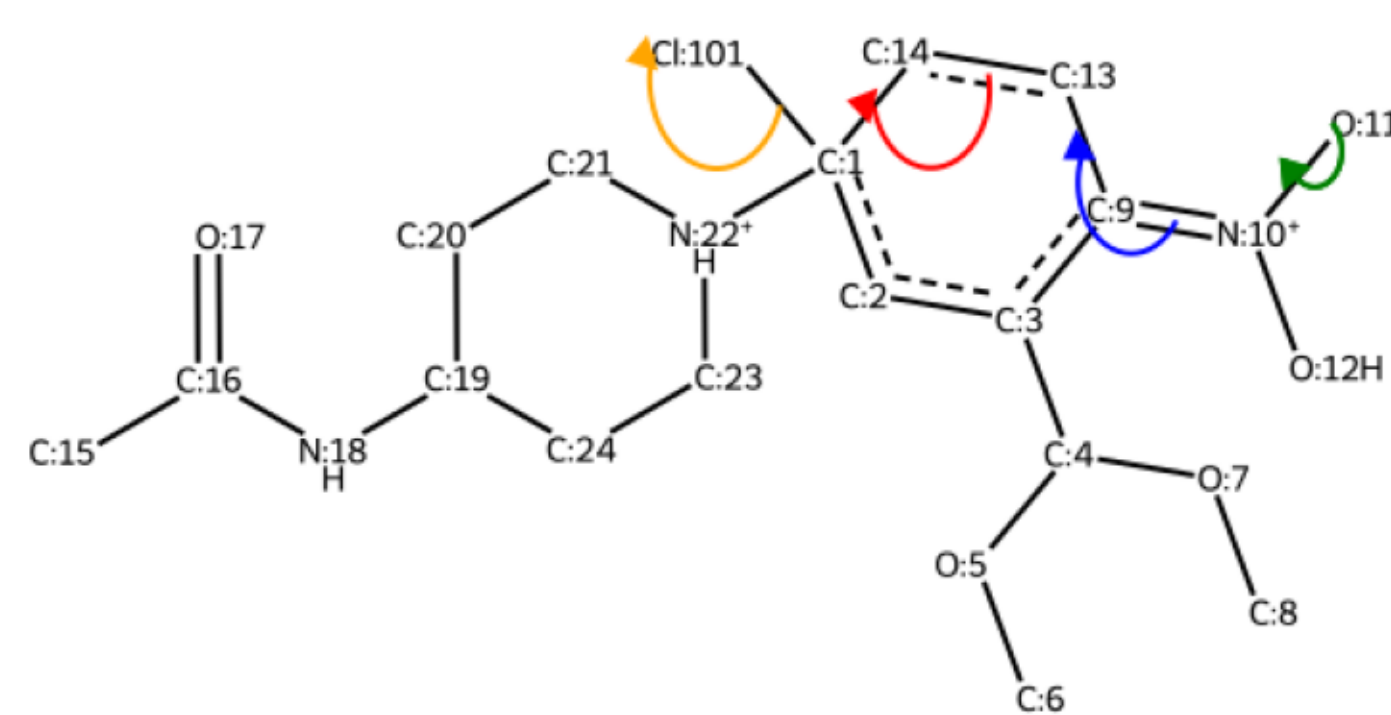

Product(s)

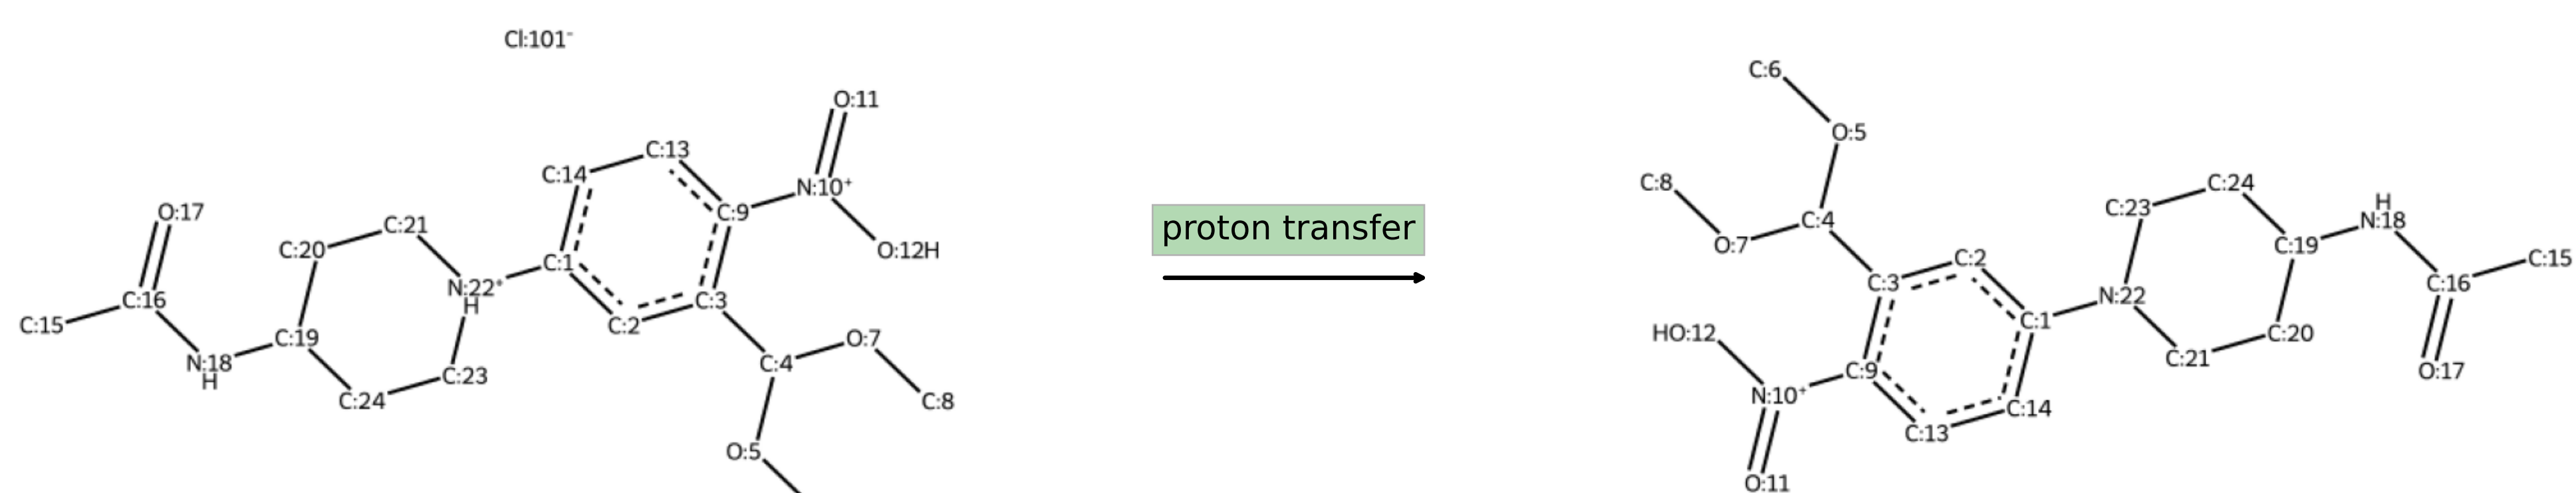

# Original reaction sampled RXN\_ID:19)

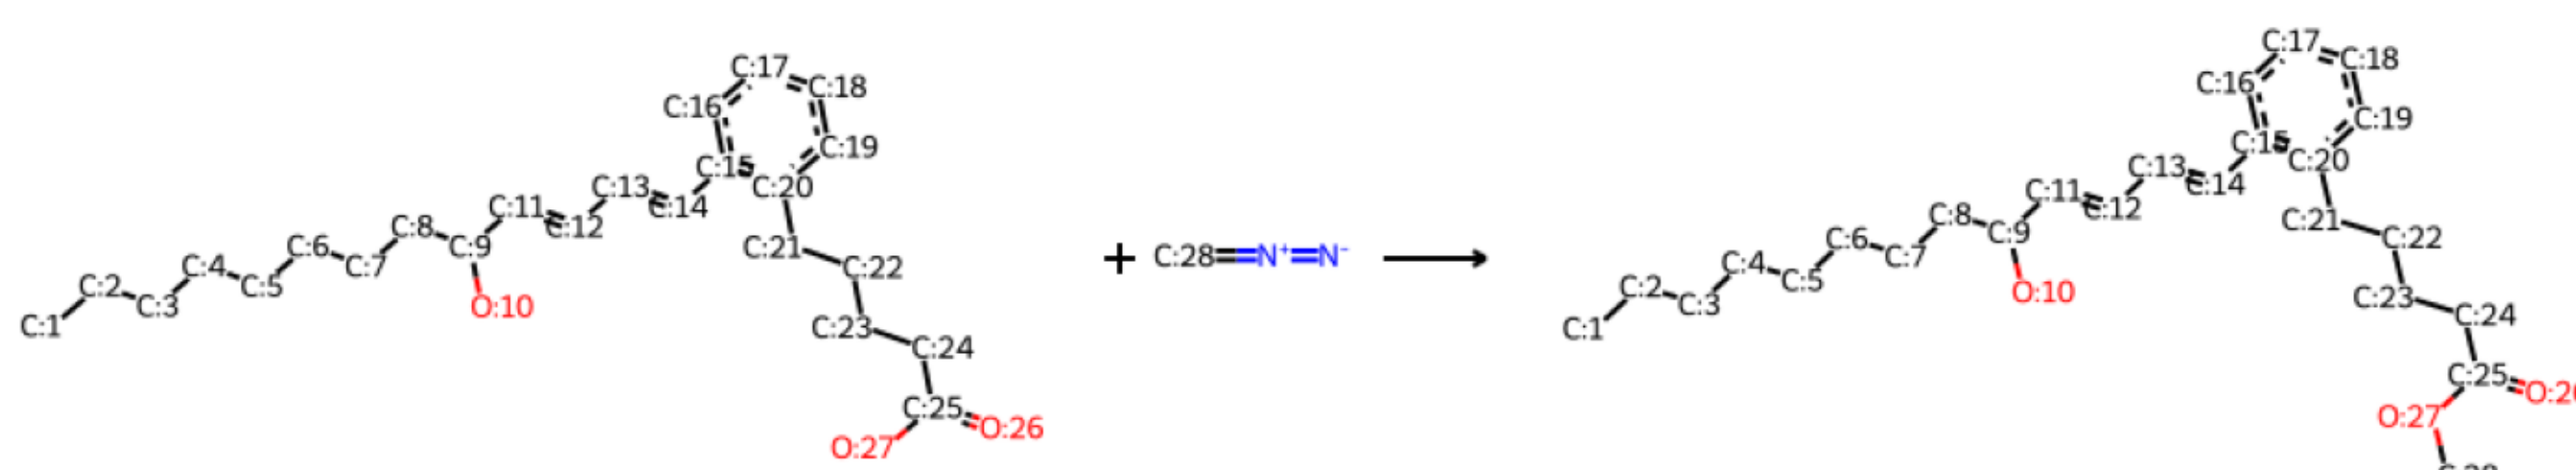

Identified mechanistic class -  
methyl\_ester\_synthesis reaction

## Reaction with missing reagents recovered

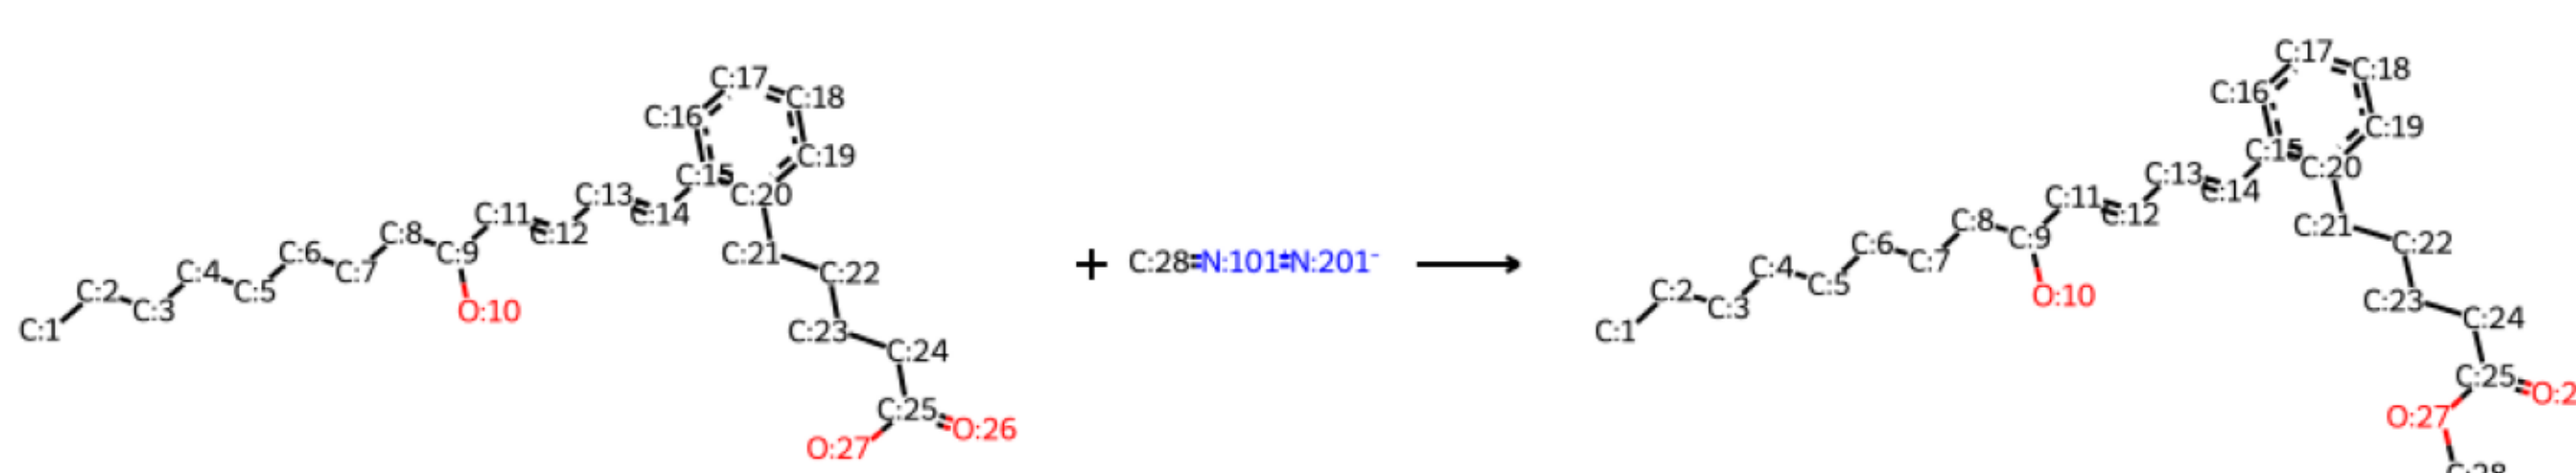

## Proposed mechanistic pathway

[Arrow order: (1) green, (2) blue, (3) red, (4) orange]

step #1

step #2

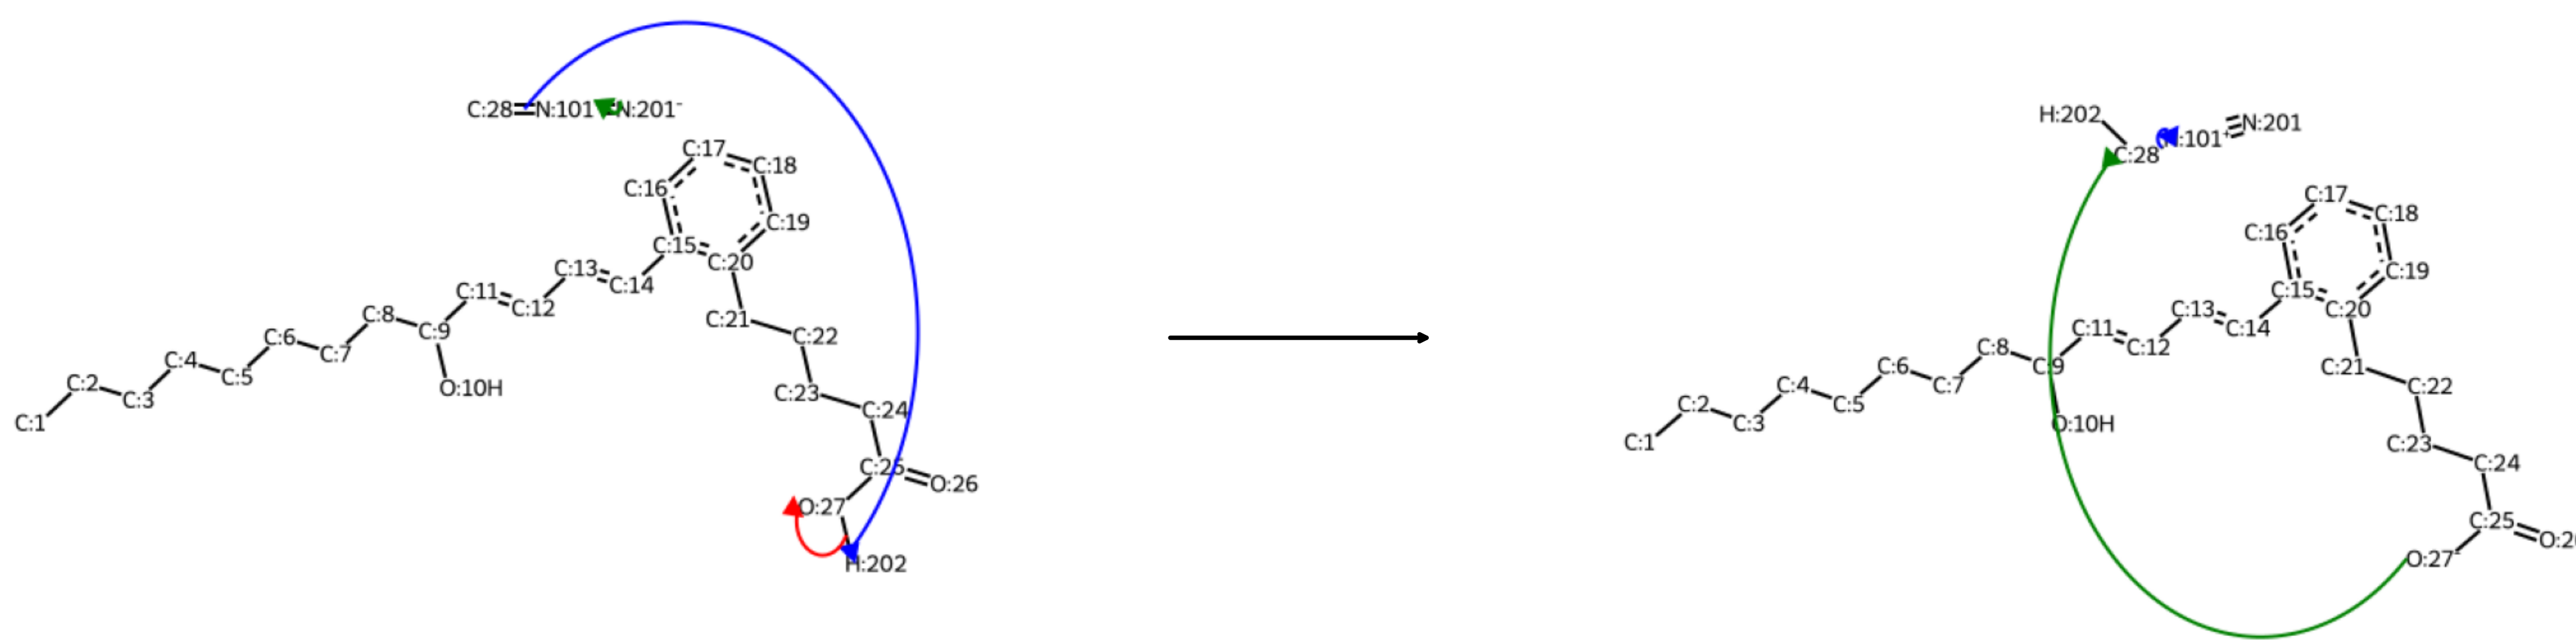

Product(s)

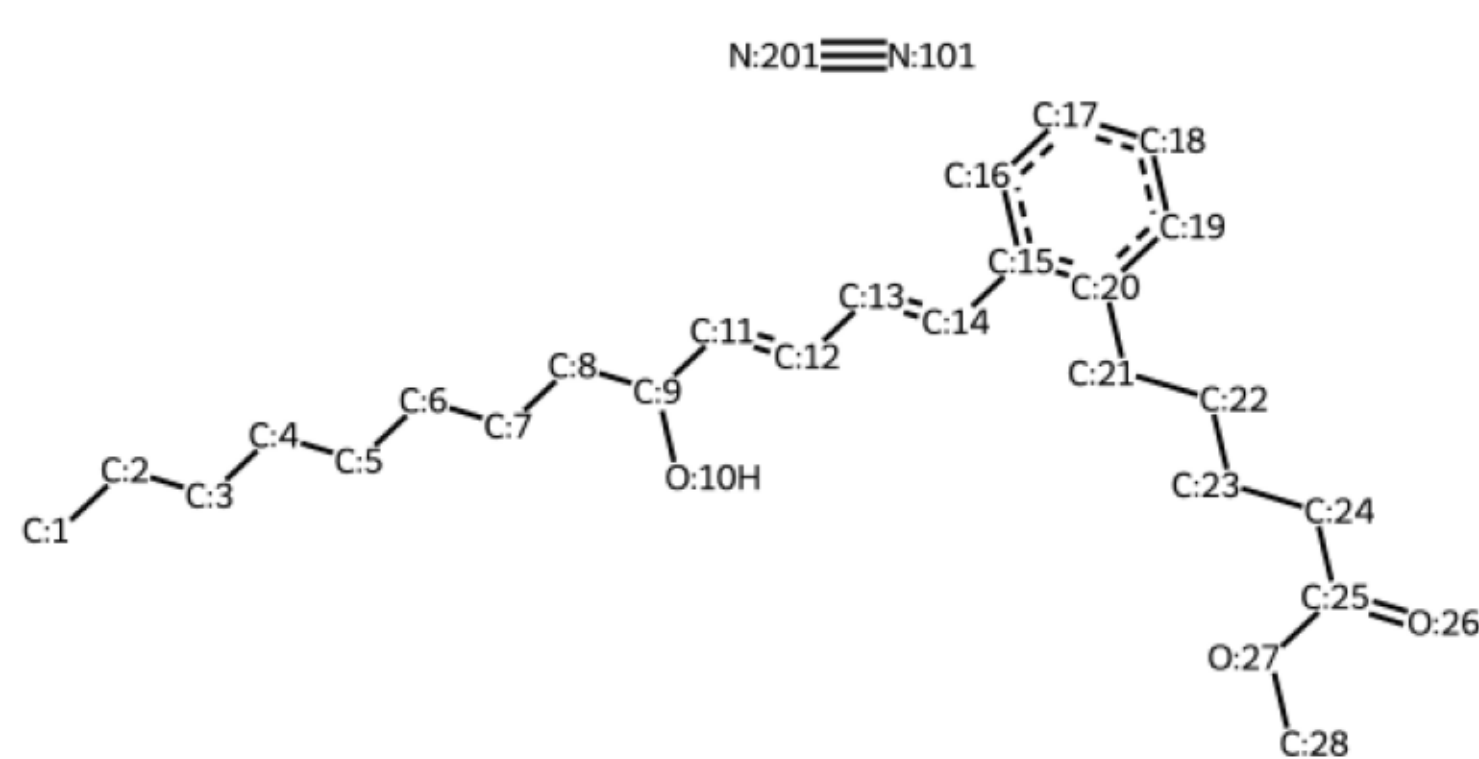



Original reaction  
sampled RXN\_ID:20)

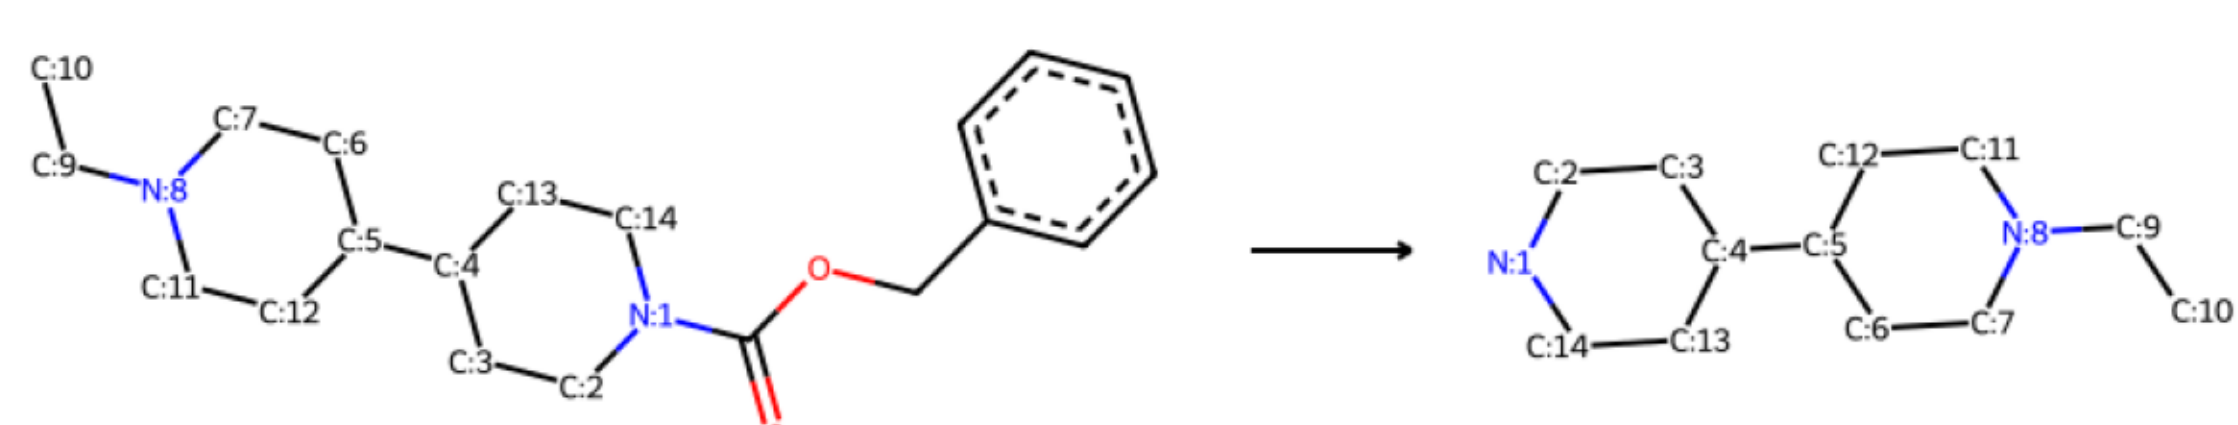

Identified mechanistic class -  
Cbz\_deprotection reaction

Reaction with missing reagents recovered

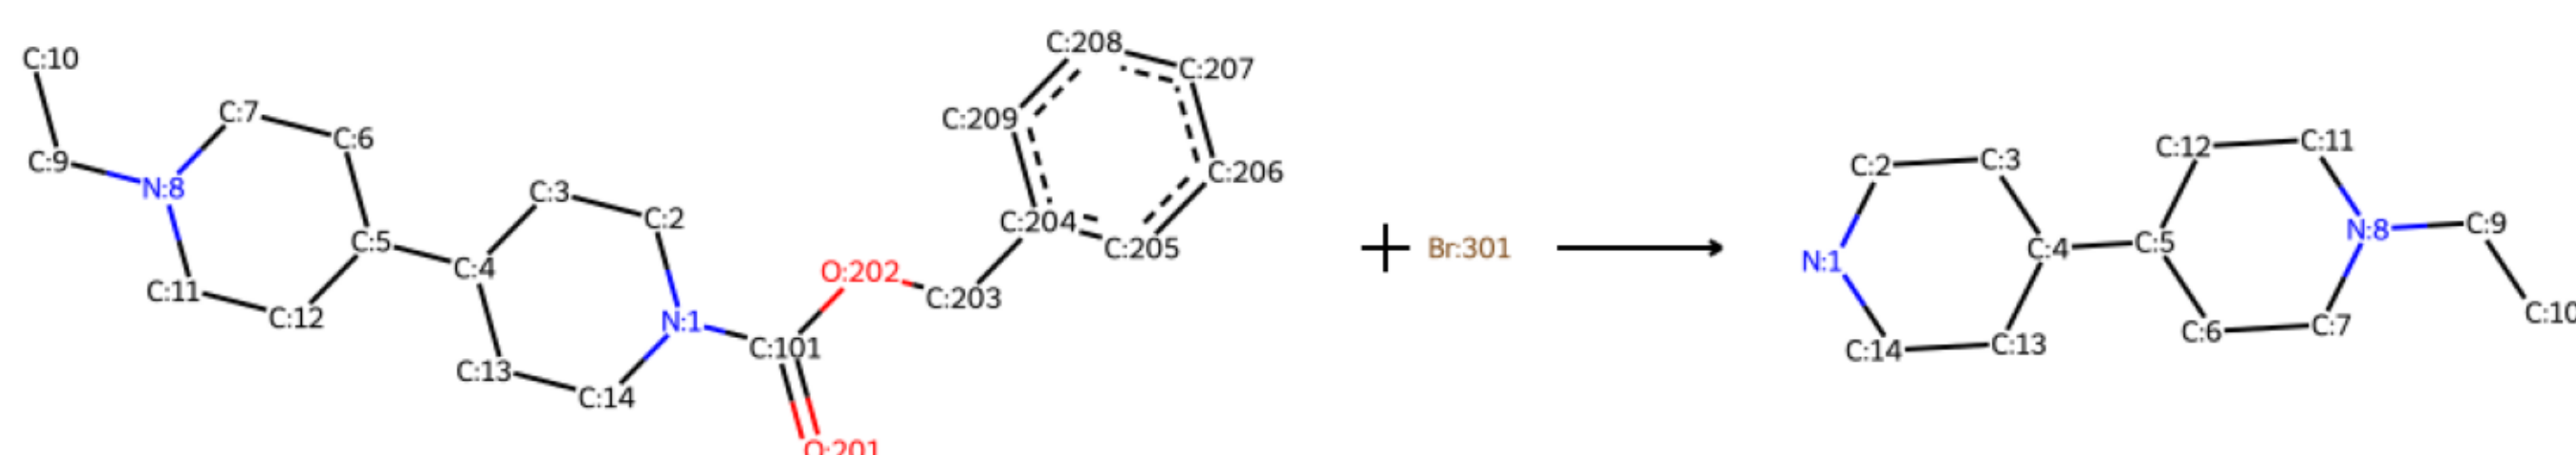

Proposed mechanistic pathway

[Arrow order: (1) green, (2) blue, (3) red, (4) orange]

step #1

step #2

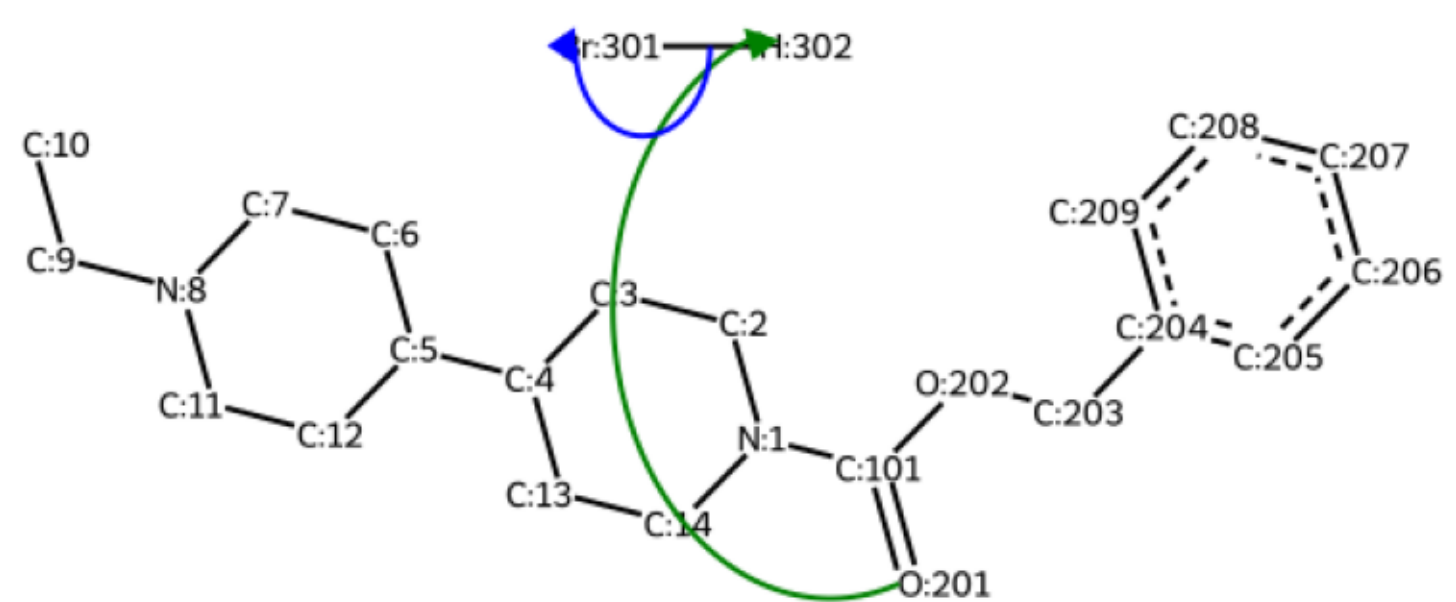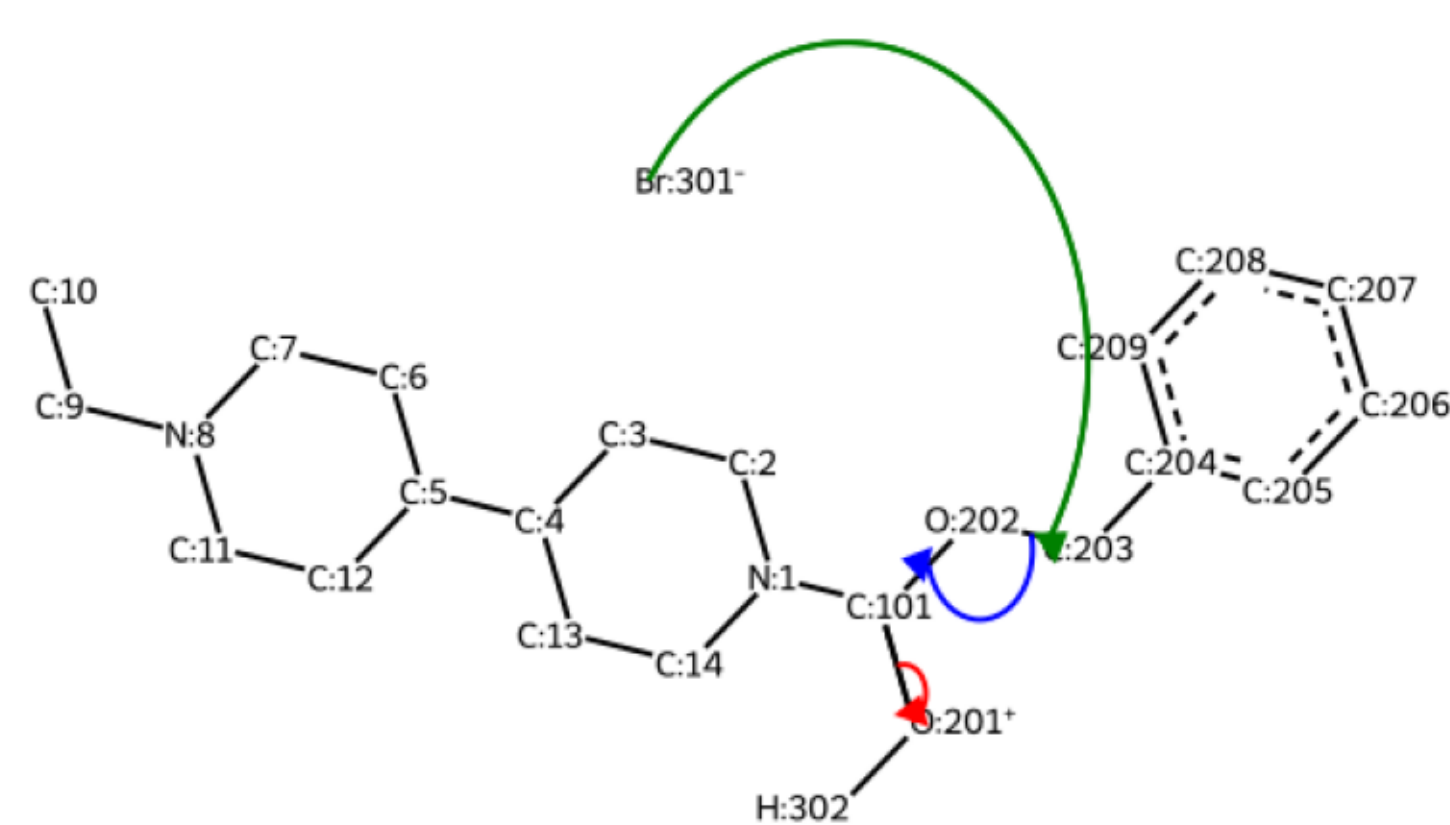

step #3

step #4

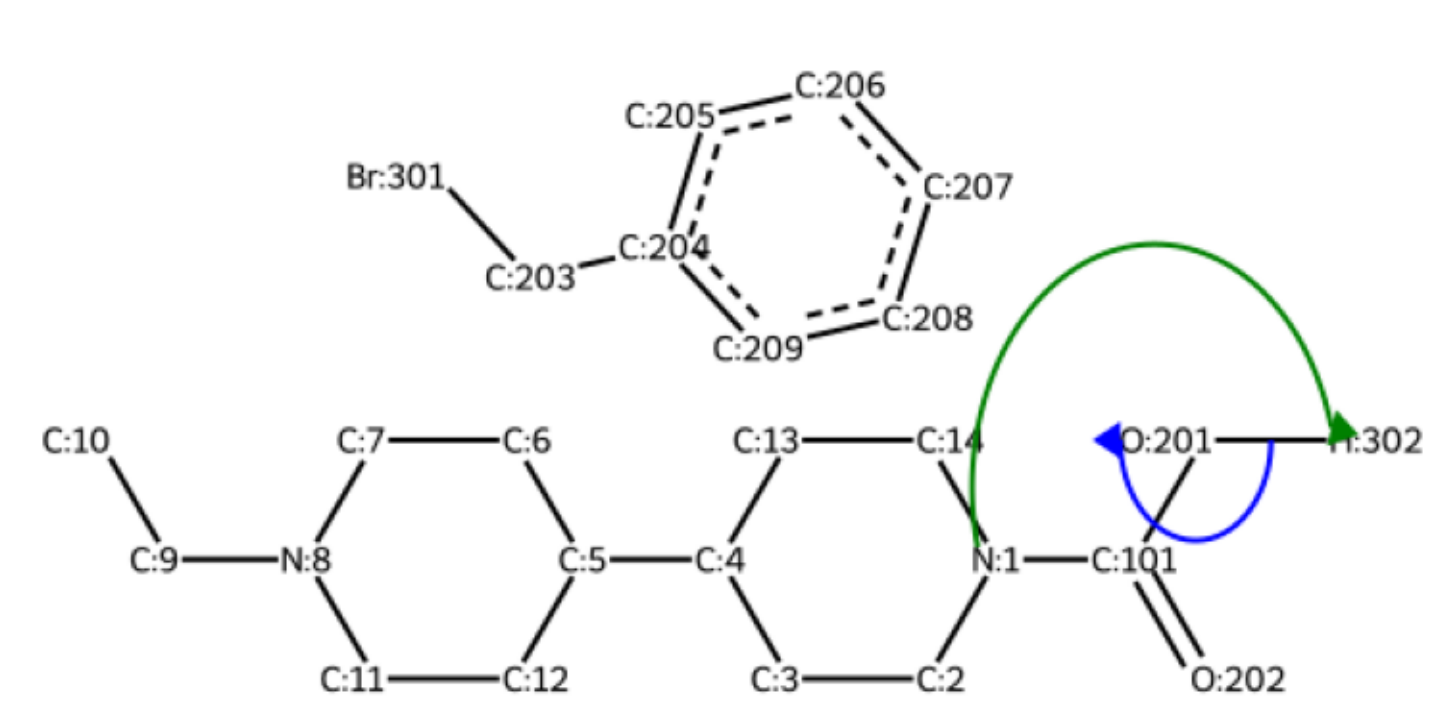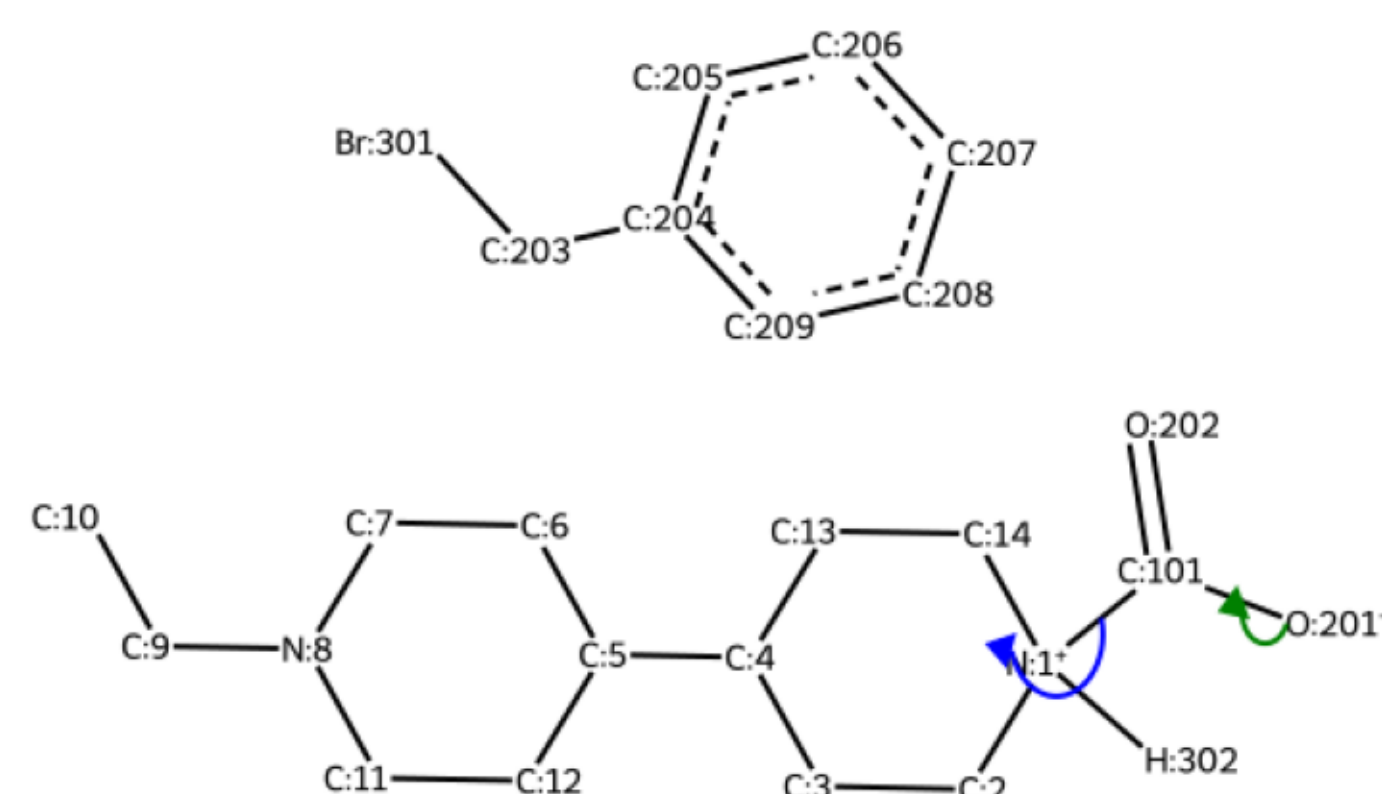

Product(s)

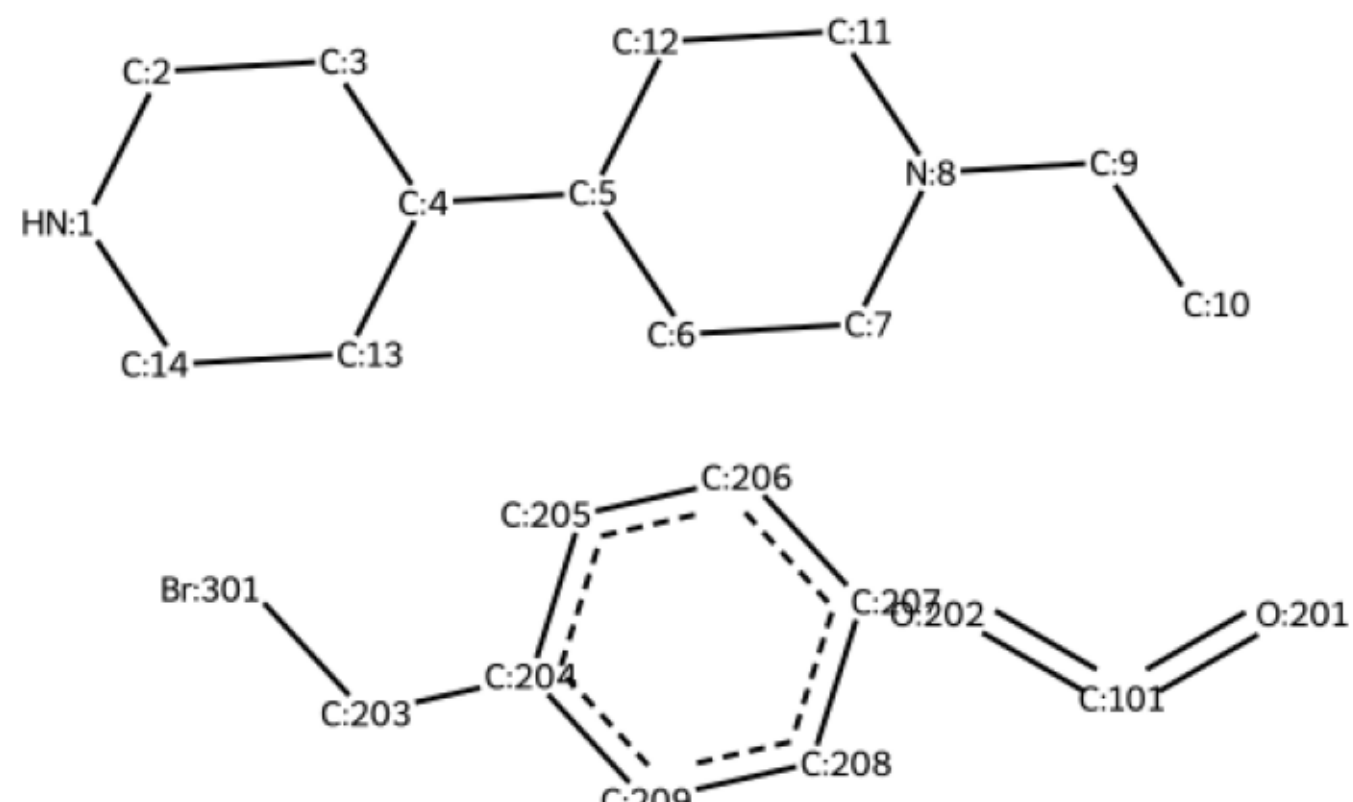

Original reaction  
sampled RXN\_ID:21)

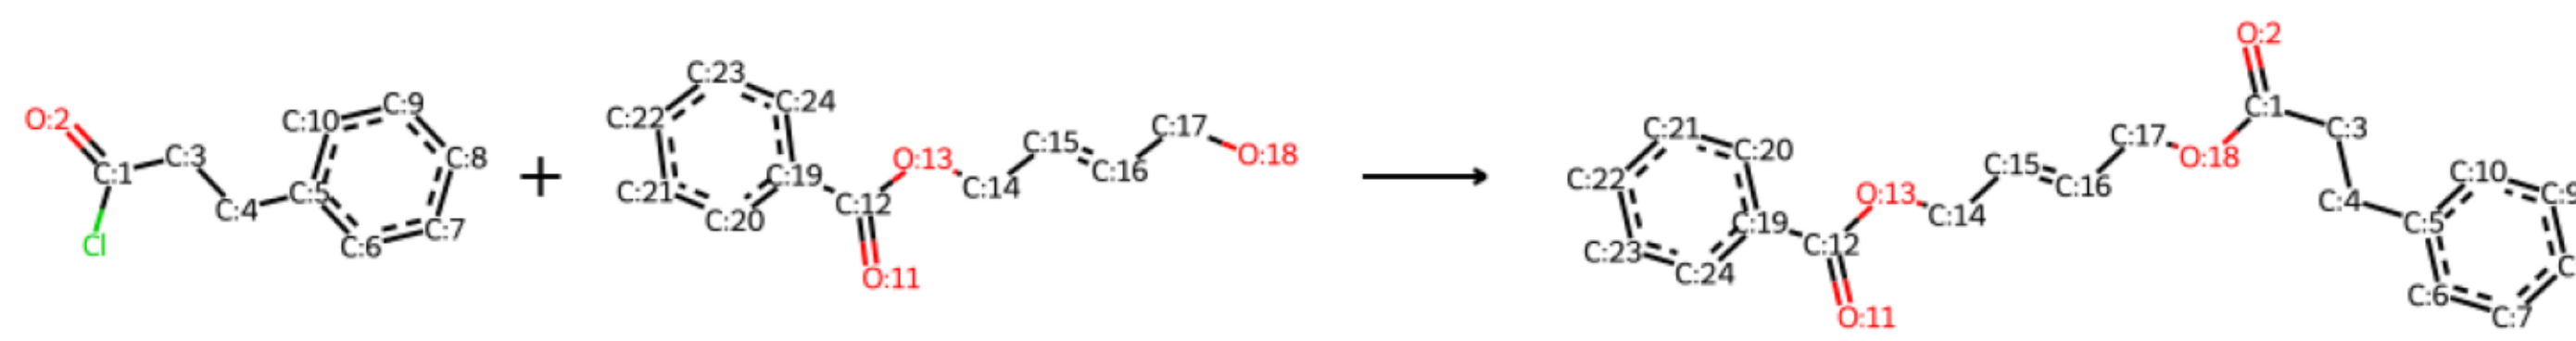

Identified mechanistic class -  
alcohol\_attack\_to\_carbonyl\_or\_sulfonyl reaction

Reaction with missing reagents recovered

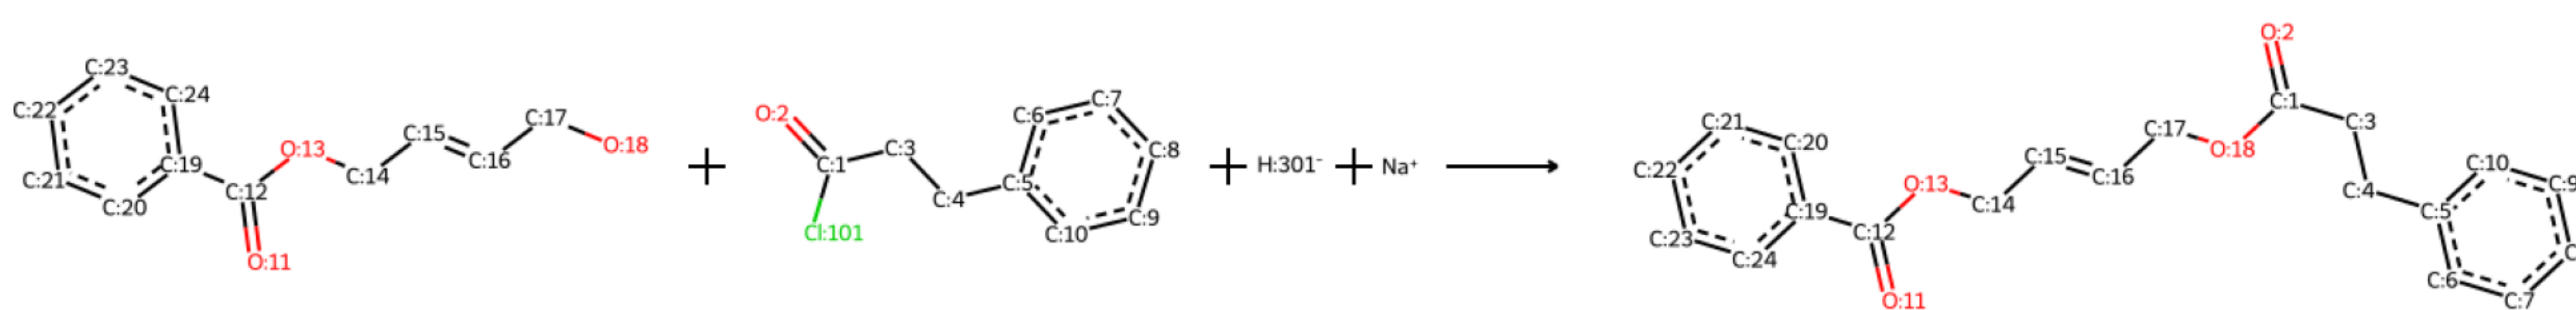

Proposed mechanistic pathway

[Arrow order: (1) green, (2) blue, (3) red, (4) orange]

step #1

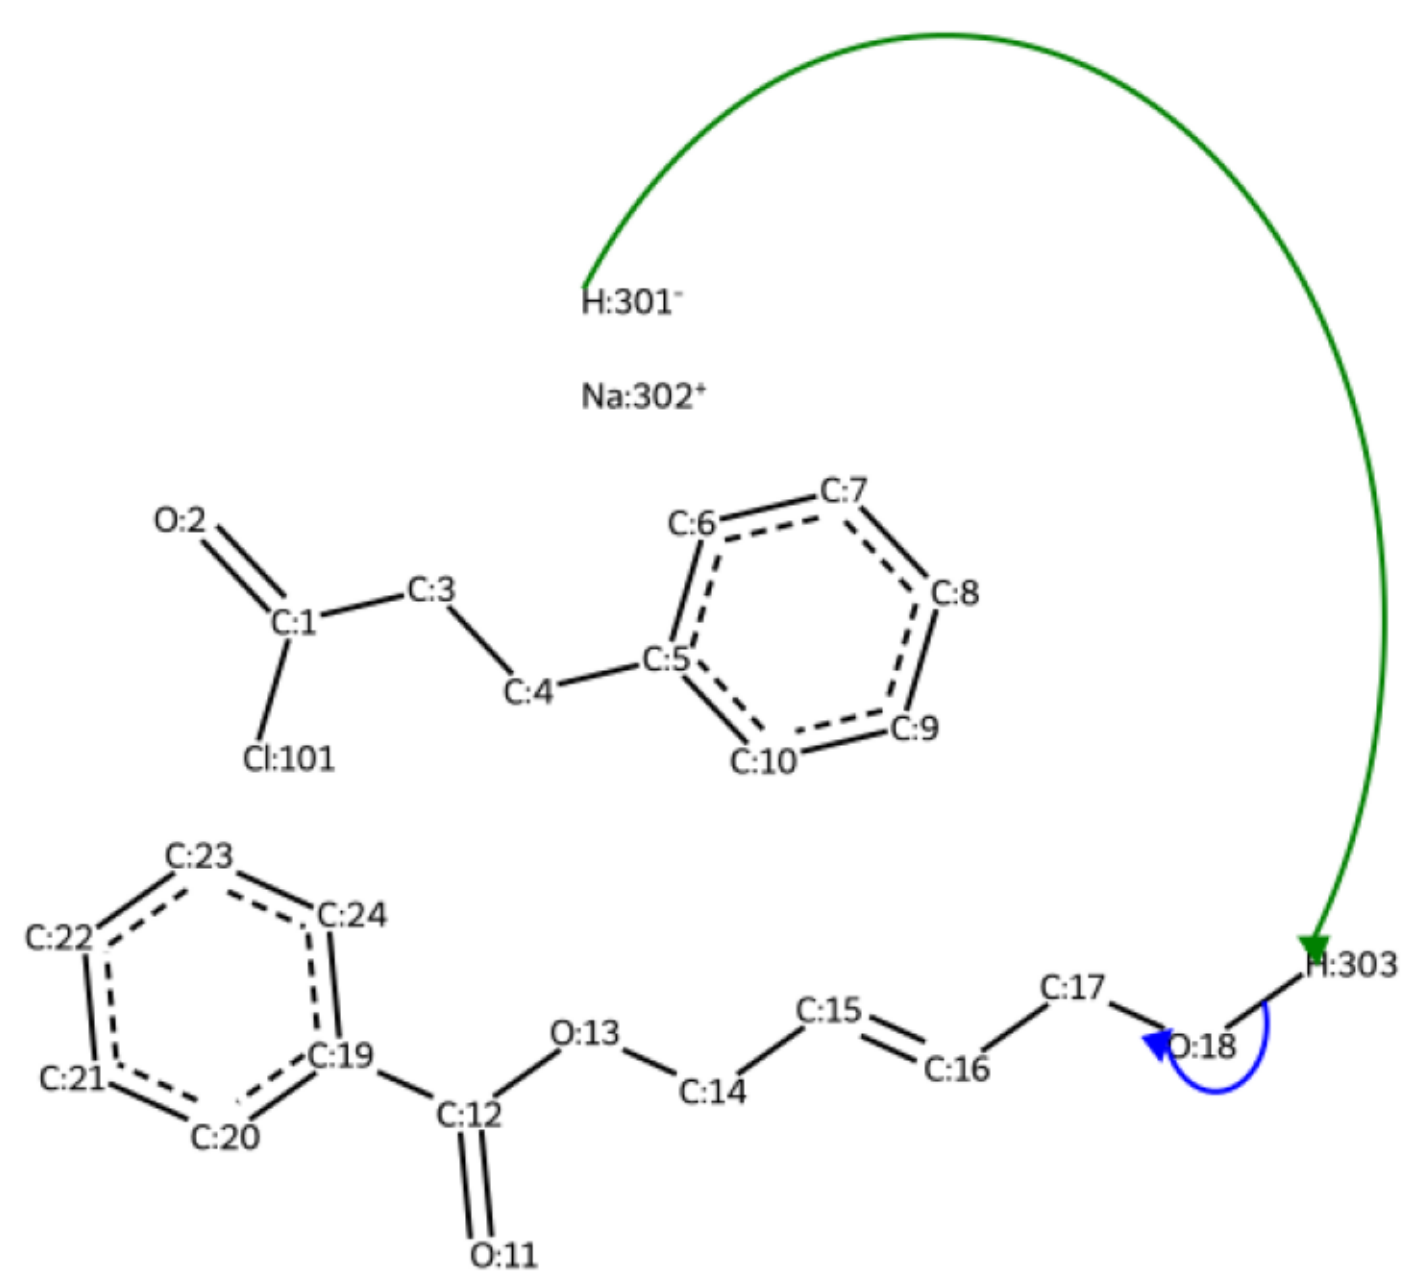

step #2

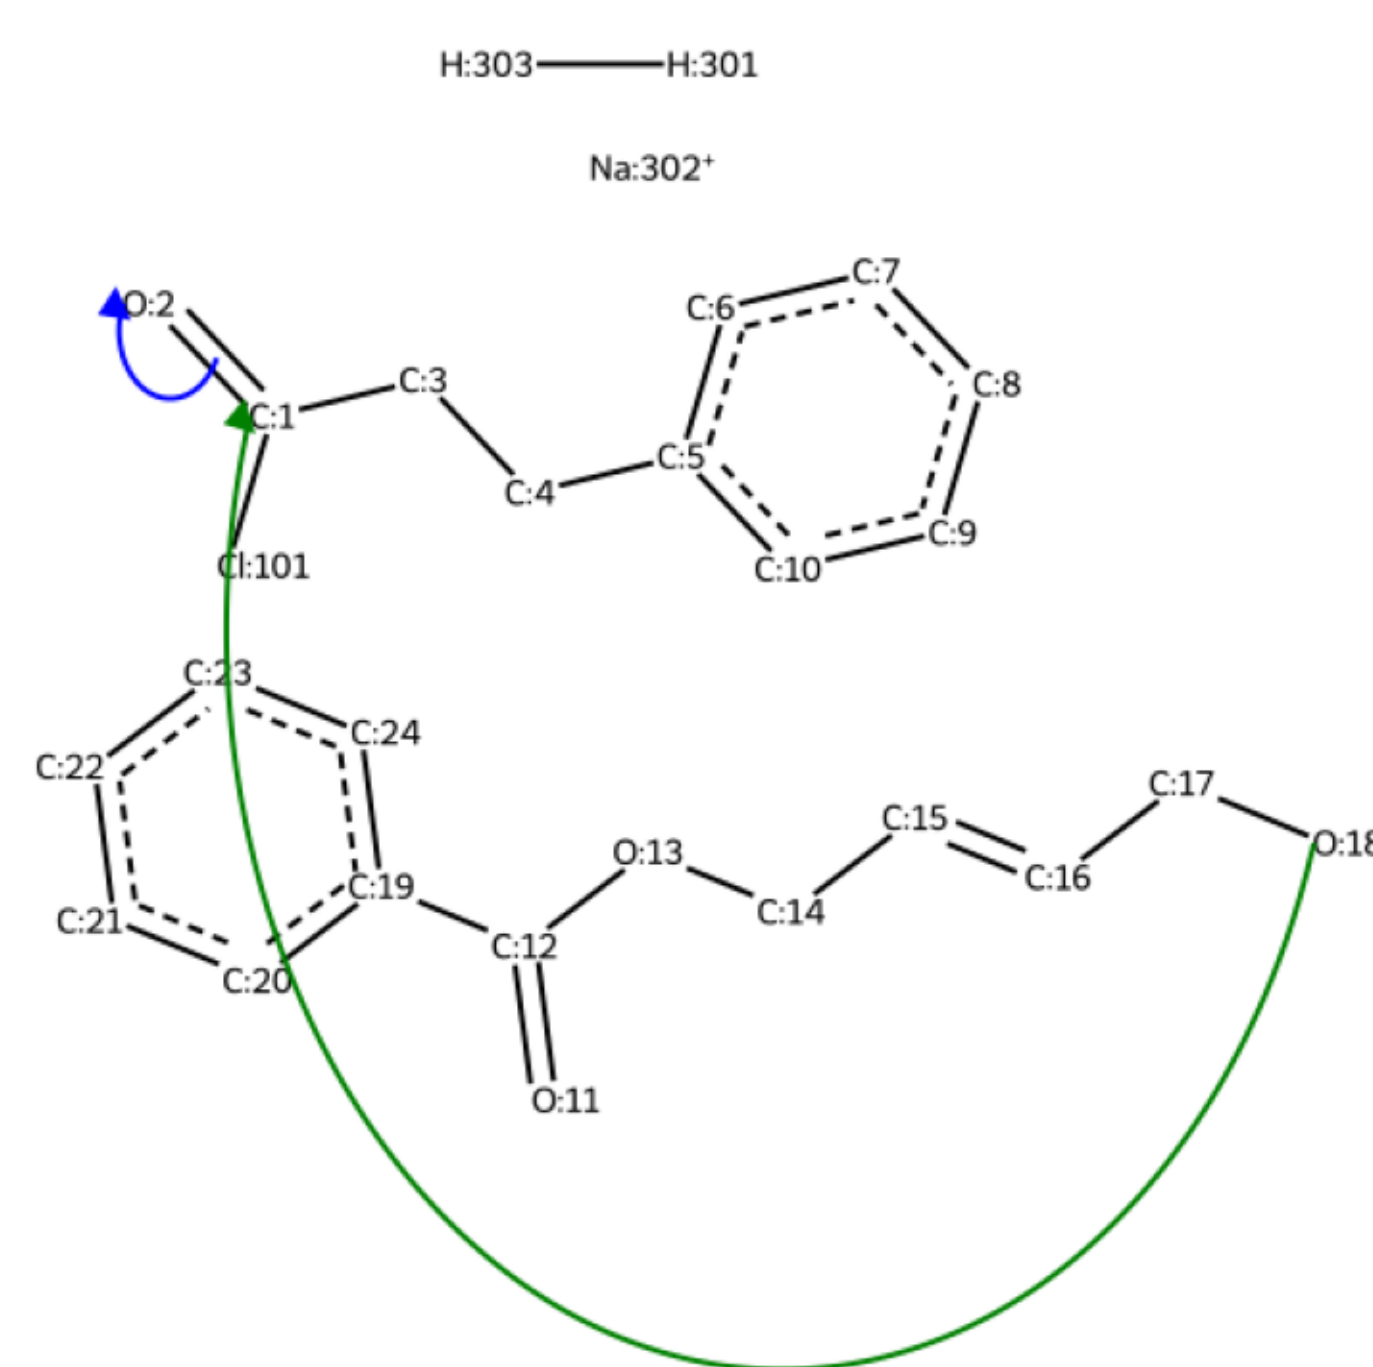

step #3

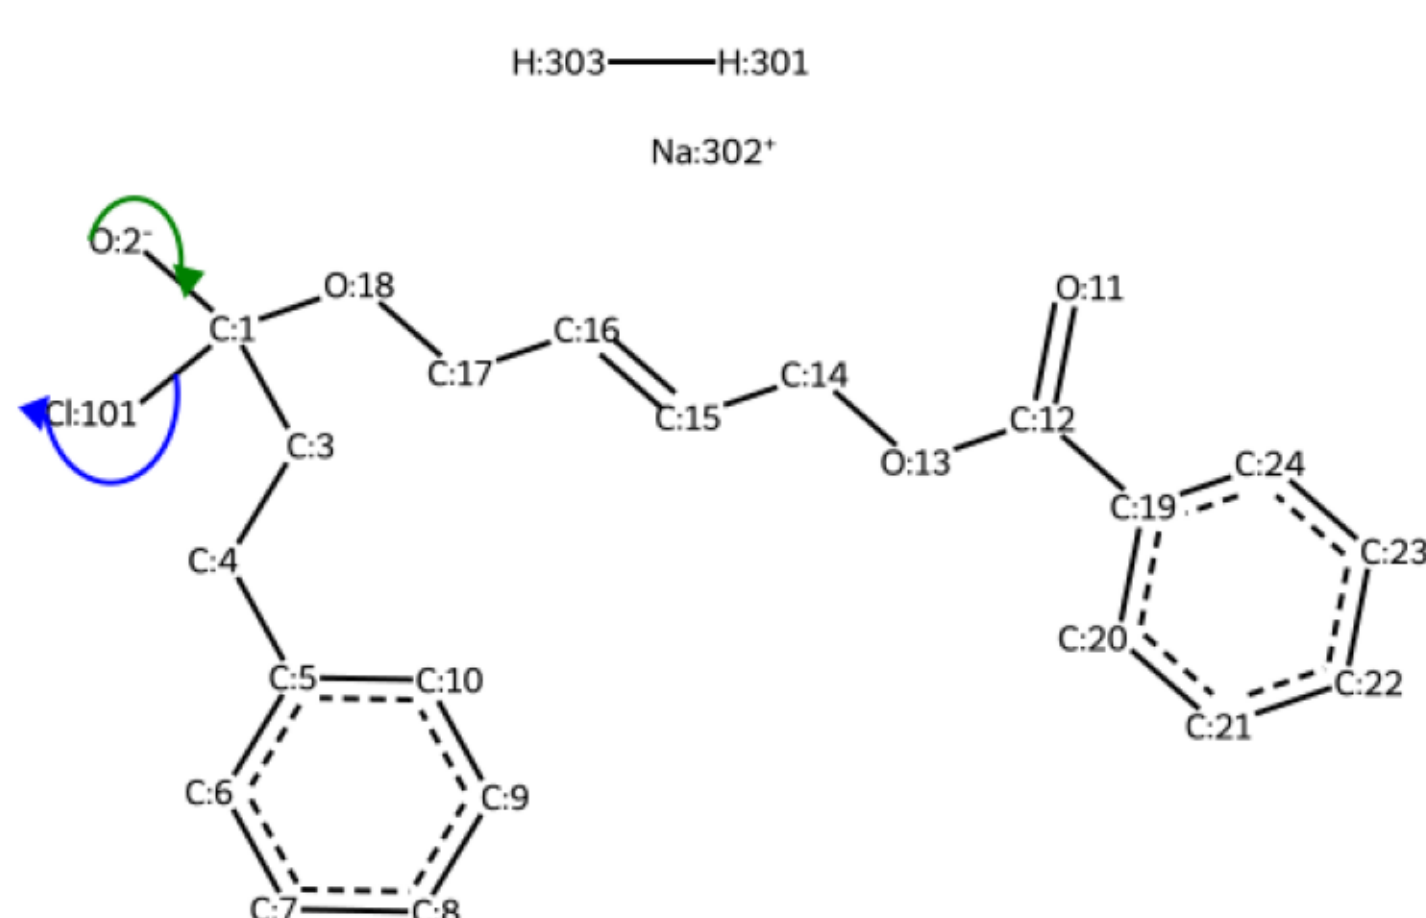

Product(s)

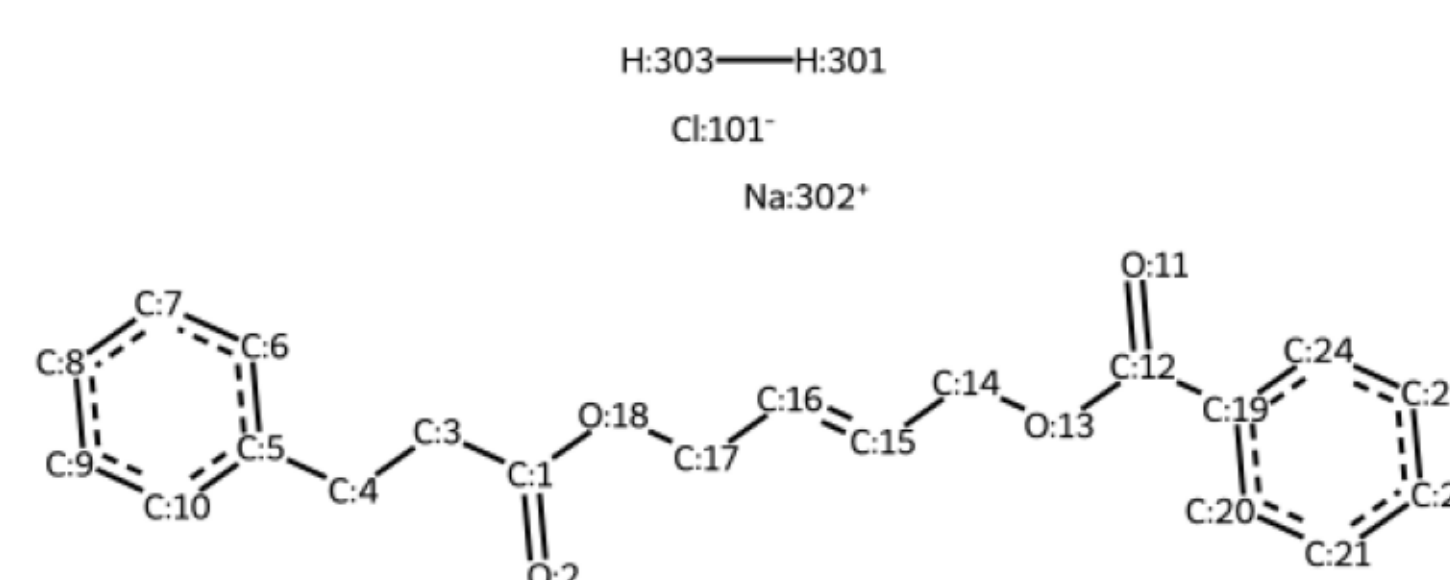



Original reaction  
sampled RXN\_ID:22)

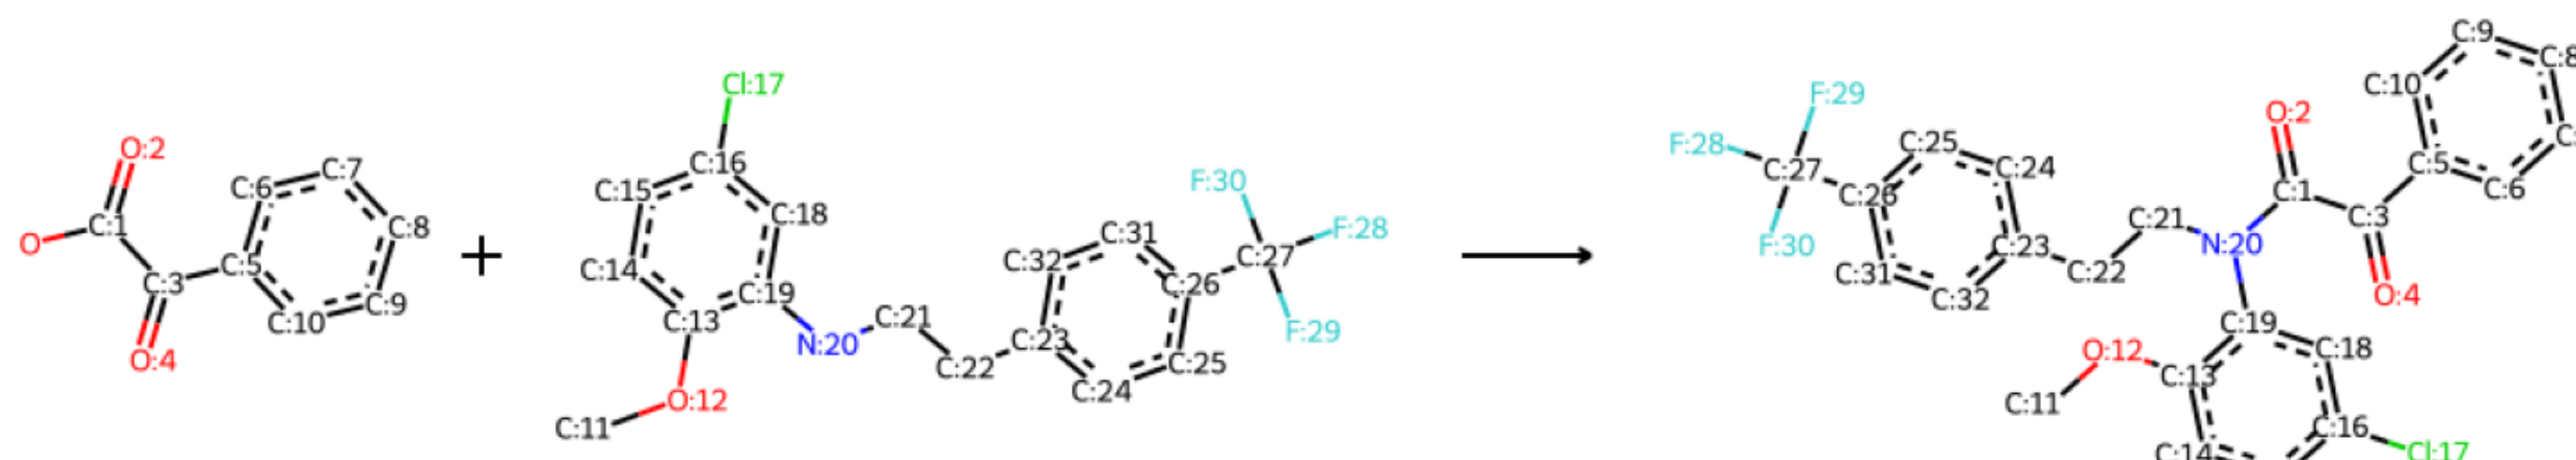

Identified mechanistic class -  
DCC\_condensation reaction

Reaction with missing reagents recovered

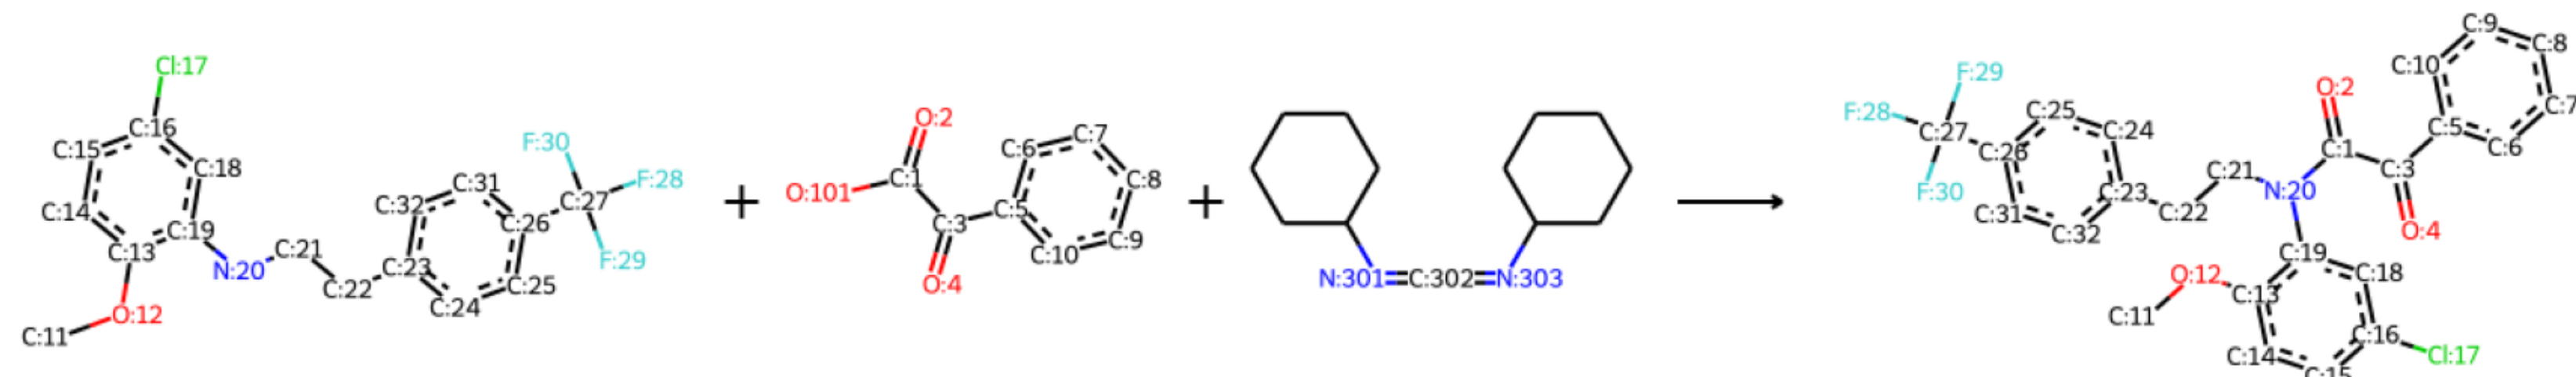

Proposed mechanistic pathway

[Arrow order: (1) green, (2) blue, (3) red, (4) orange]

step #1

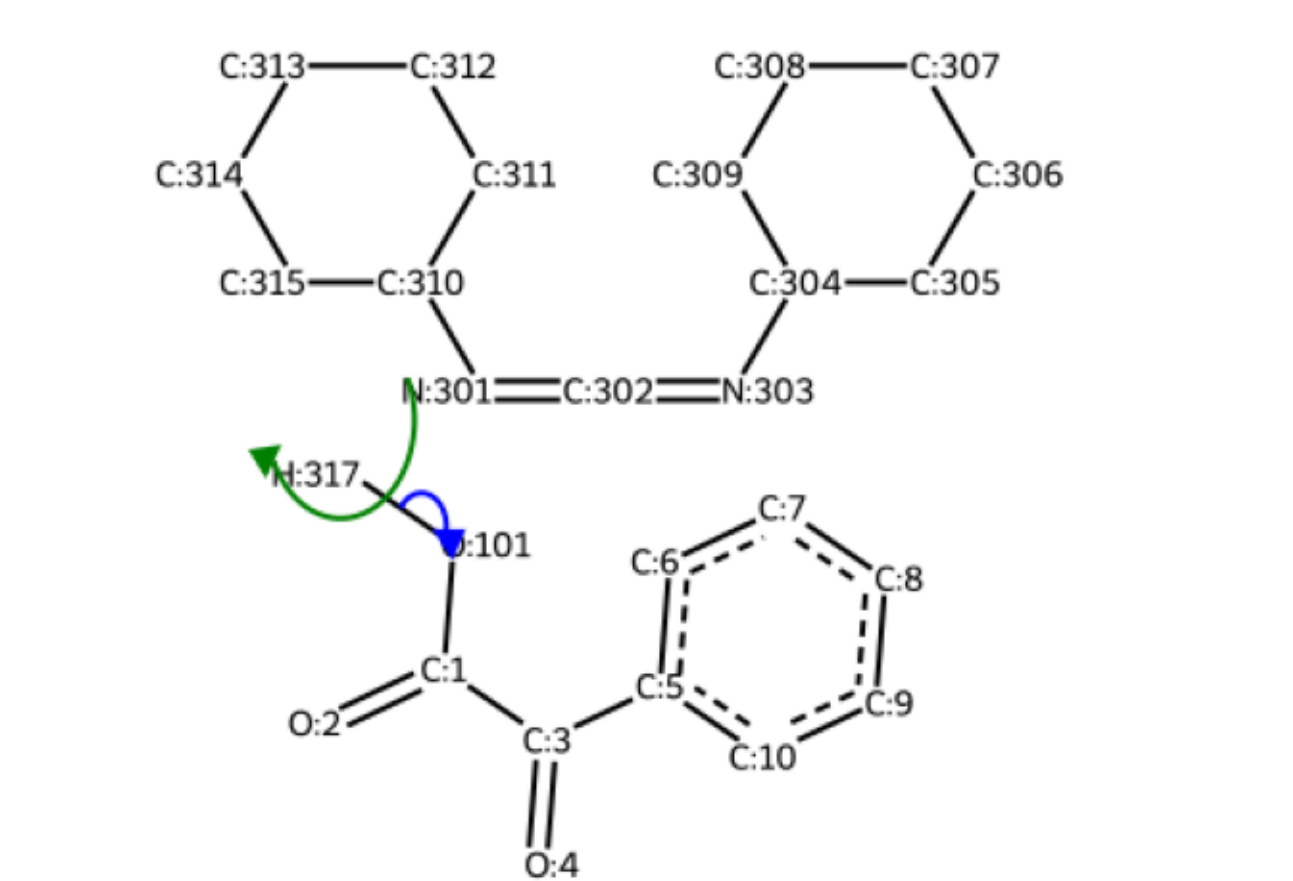

step #2

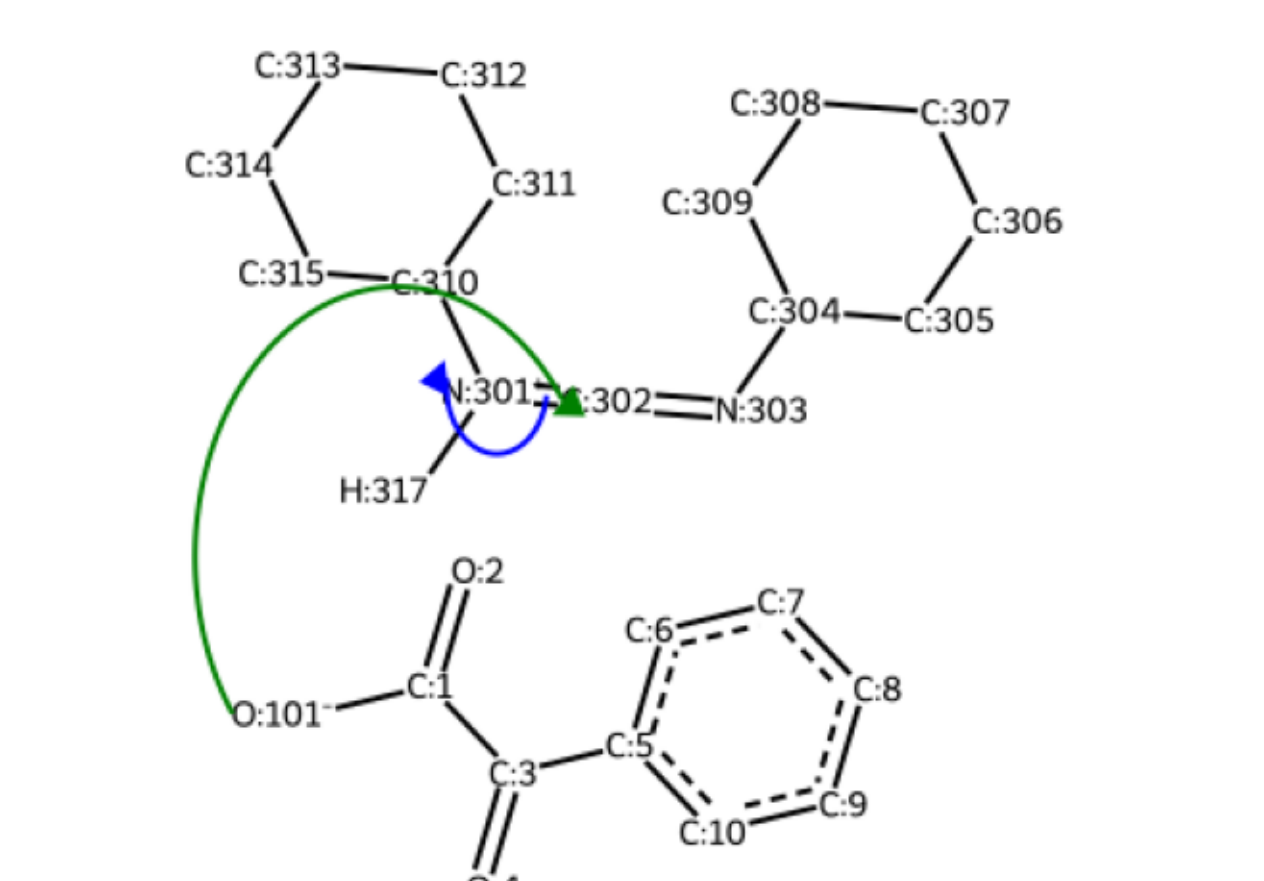

step #3

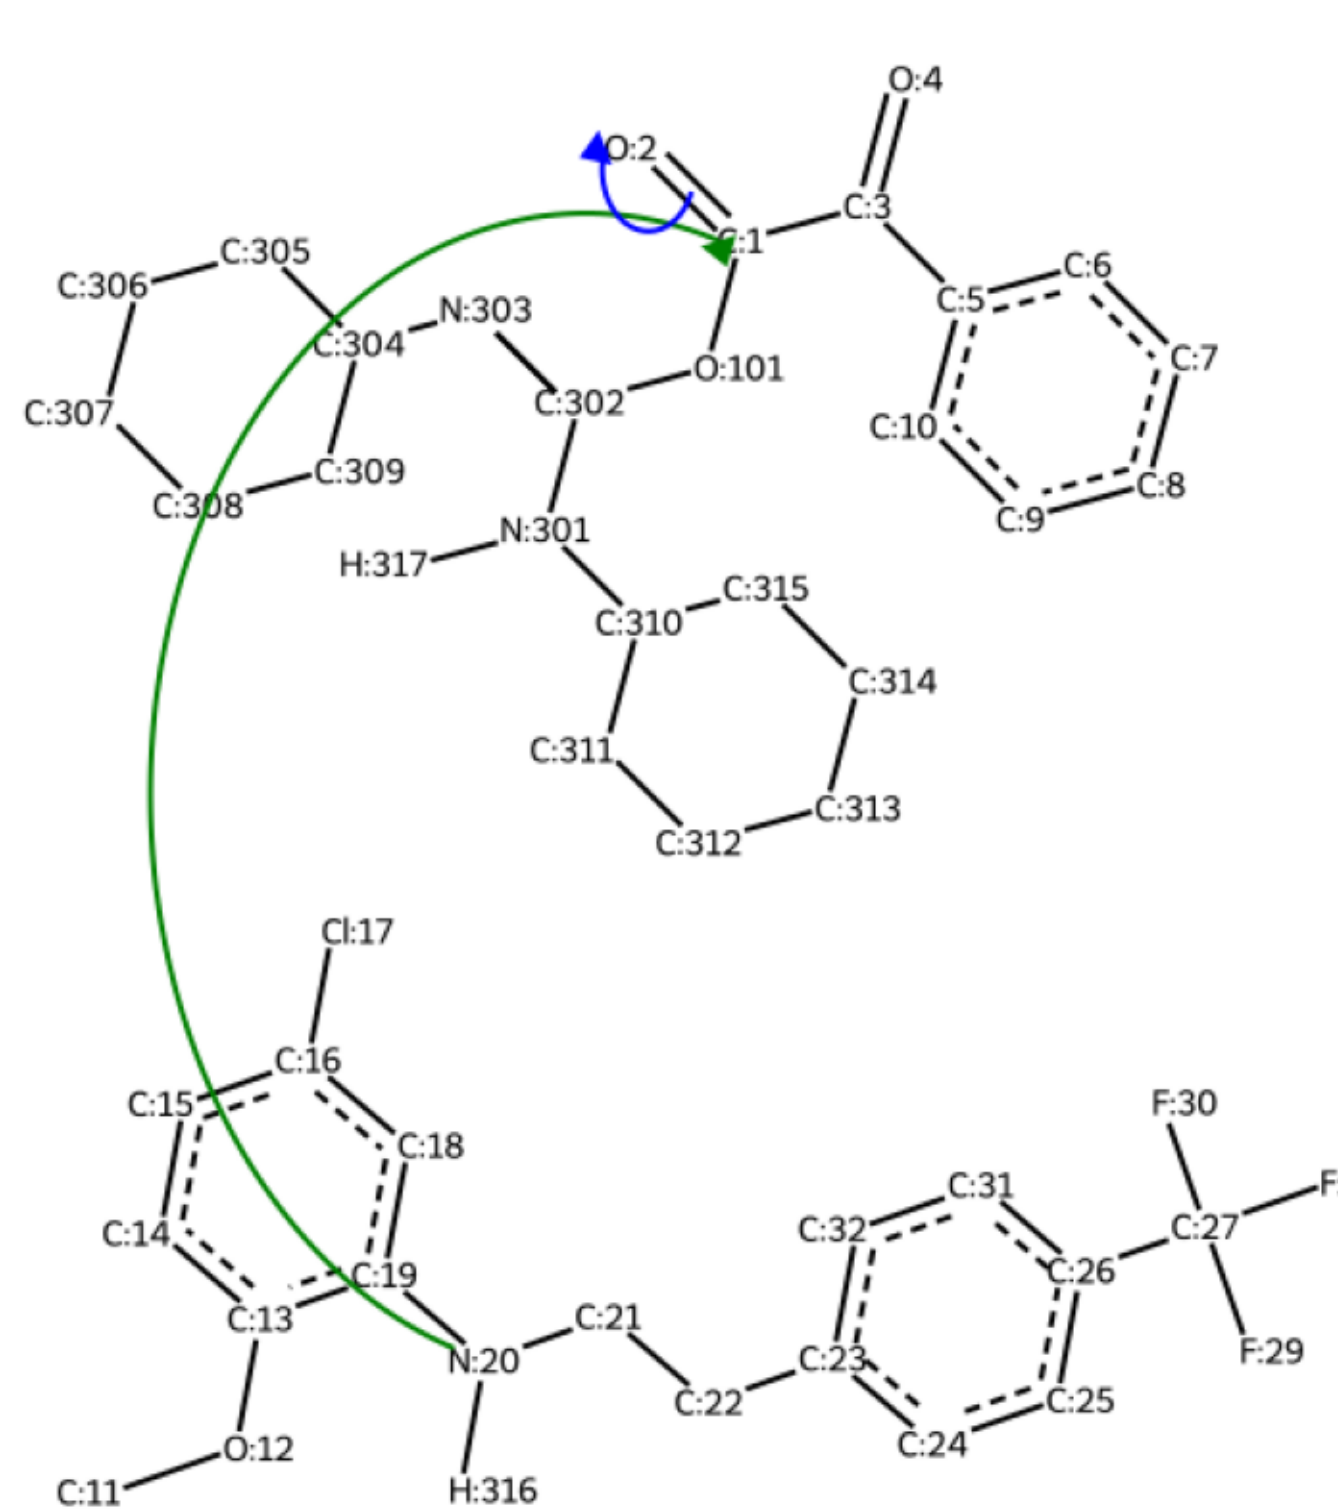

step #4

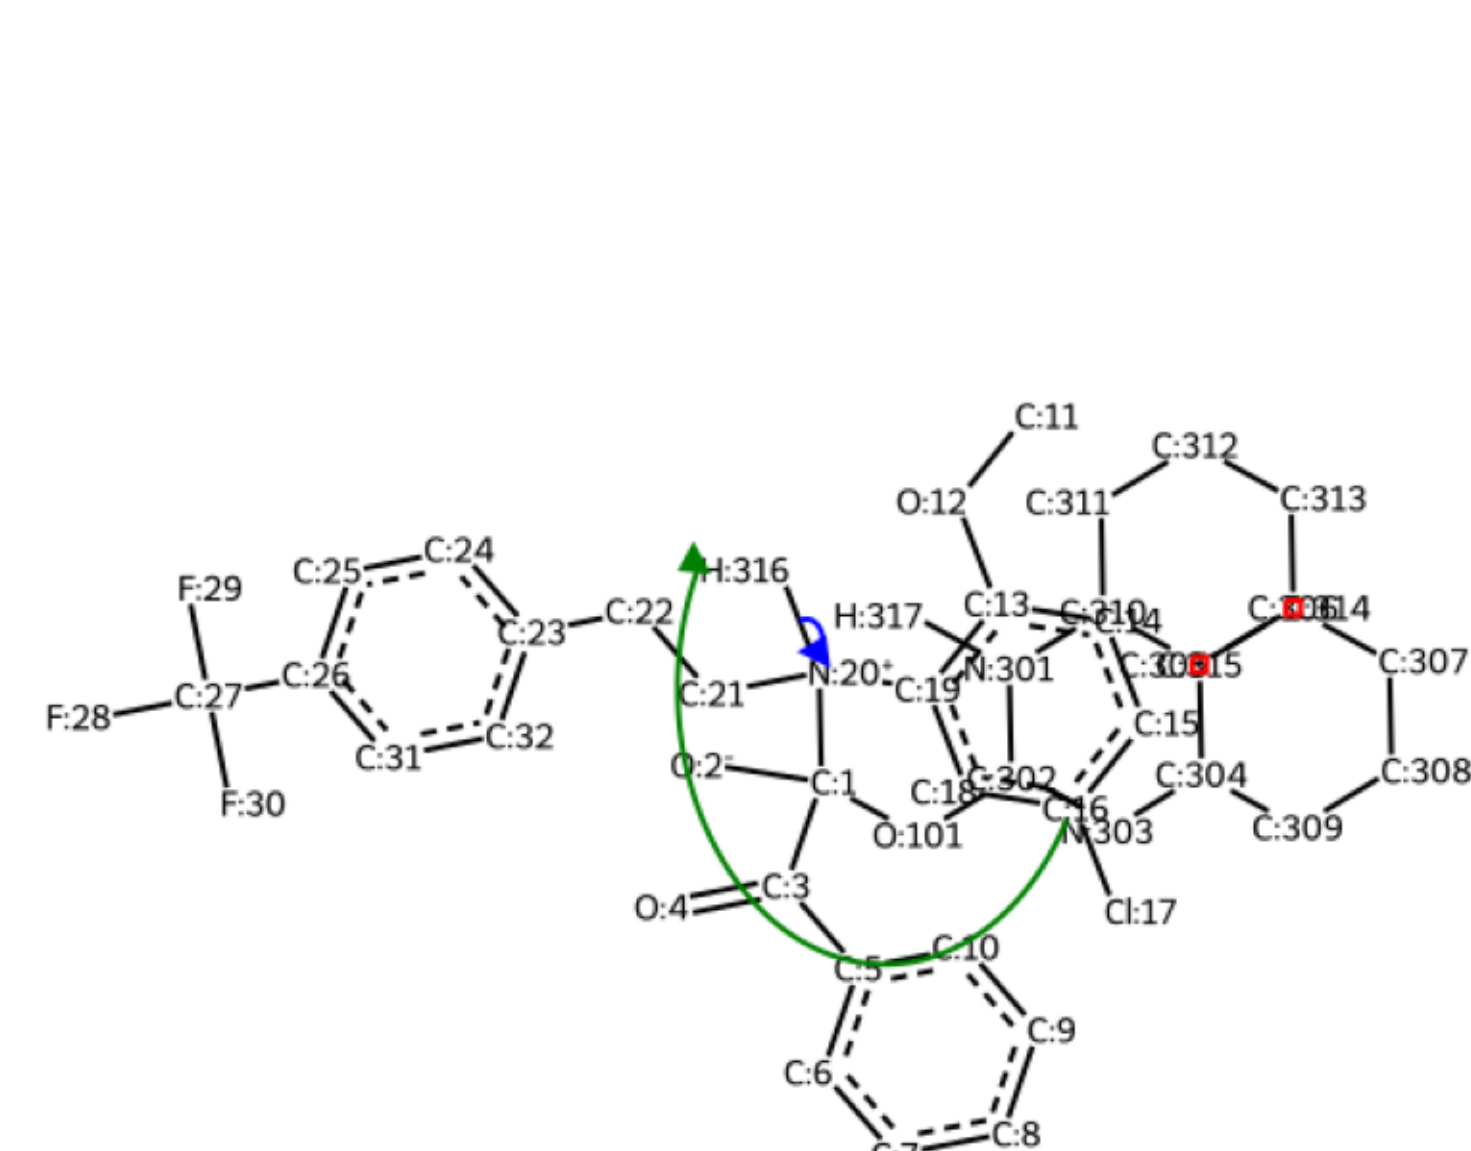

step #5

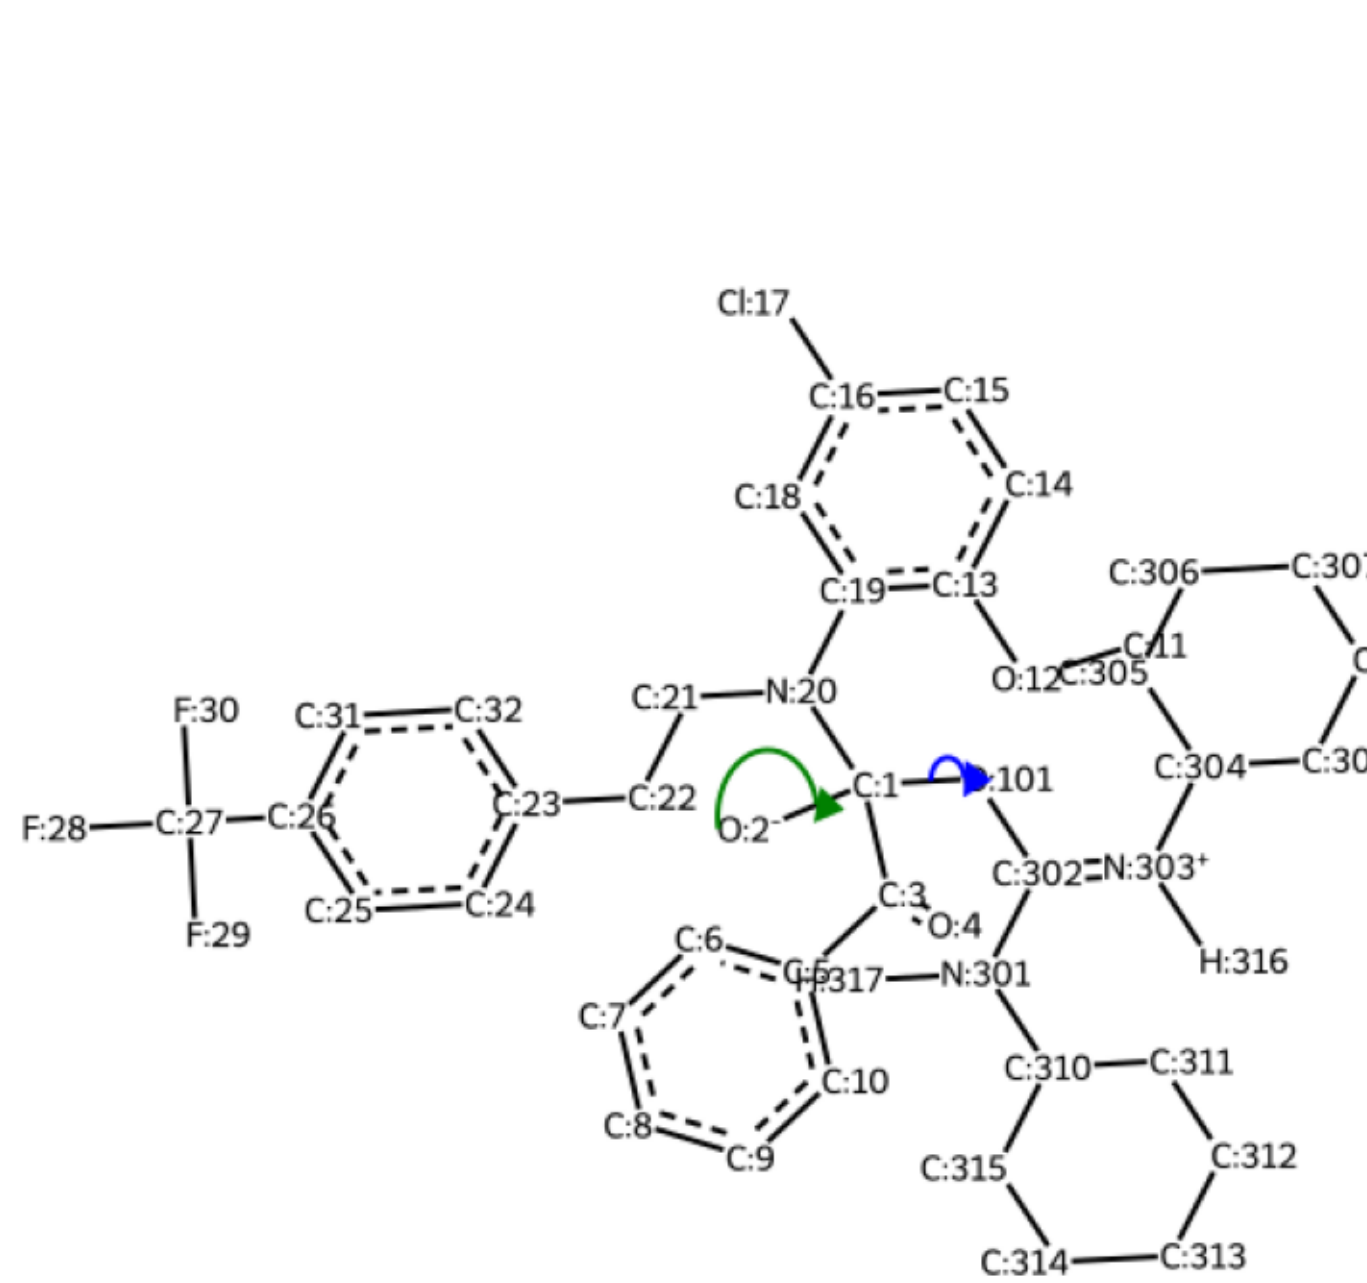

step #6

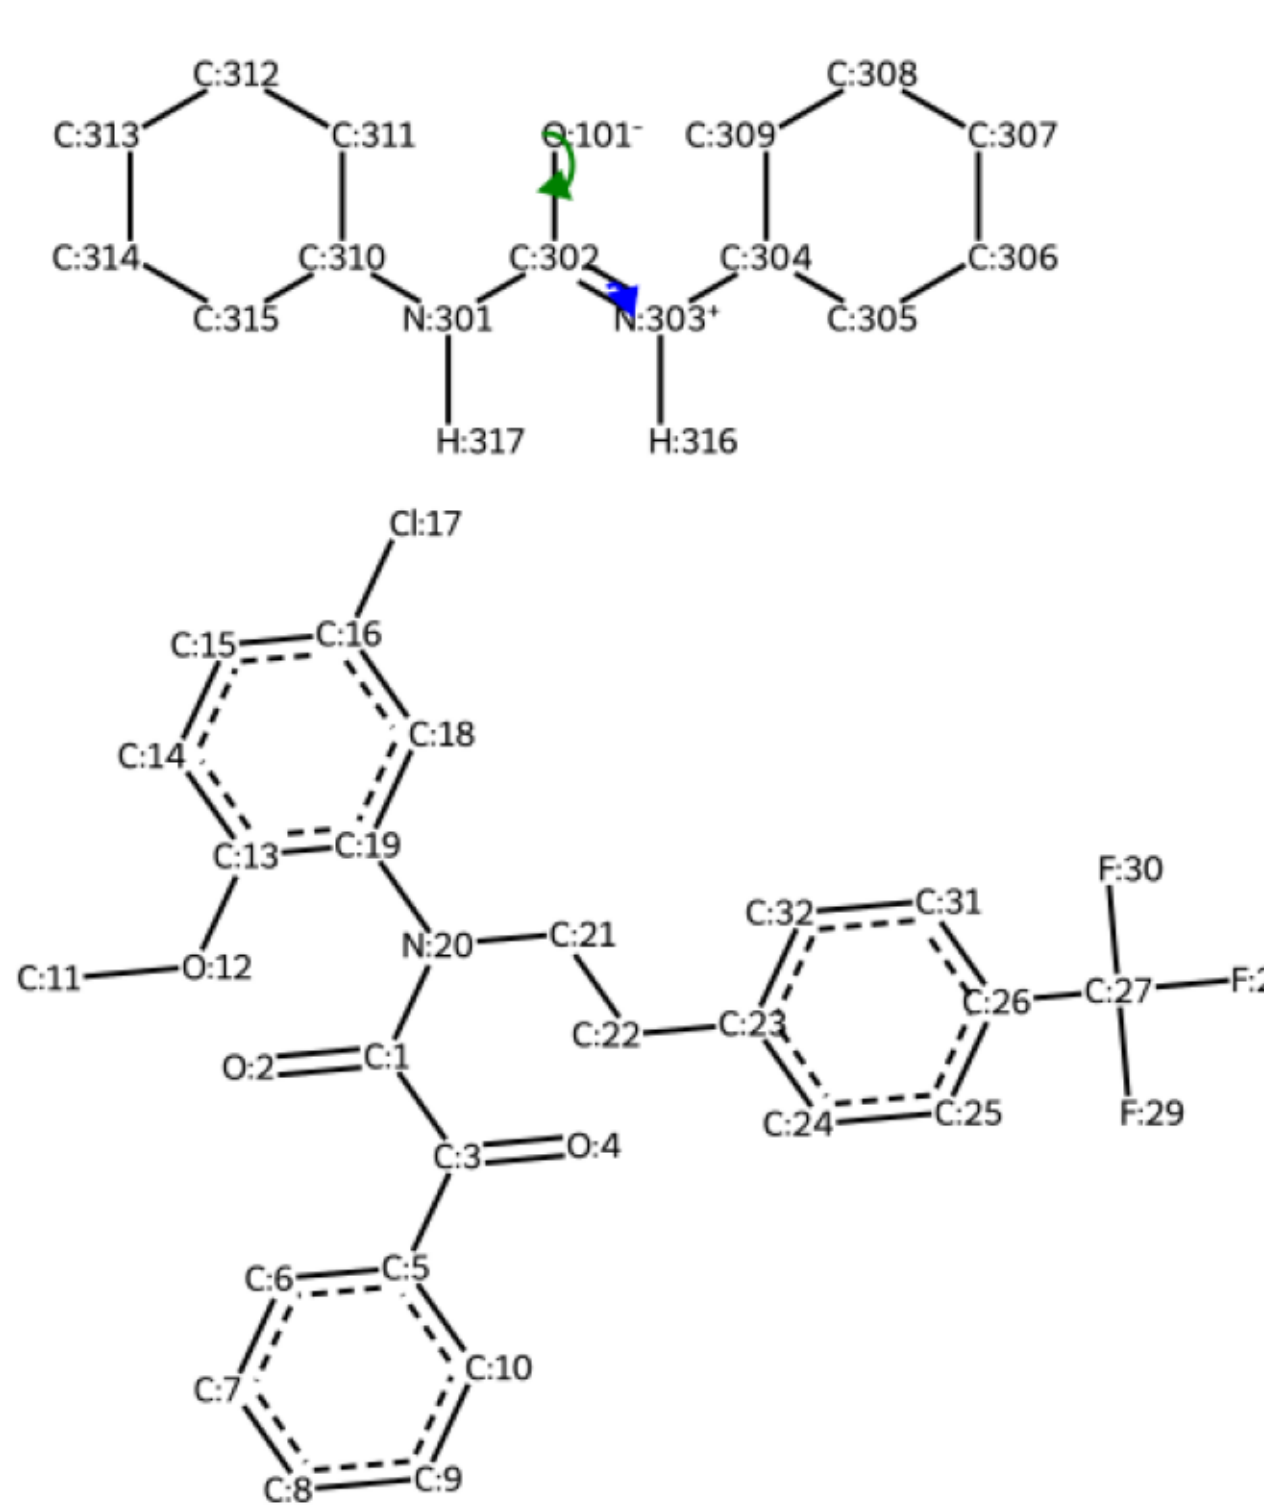

Product(s)

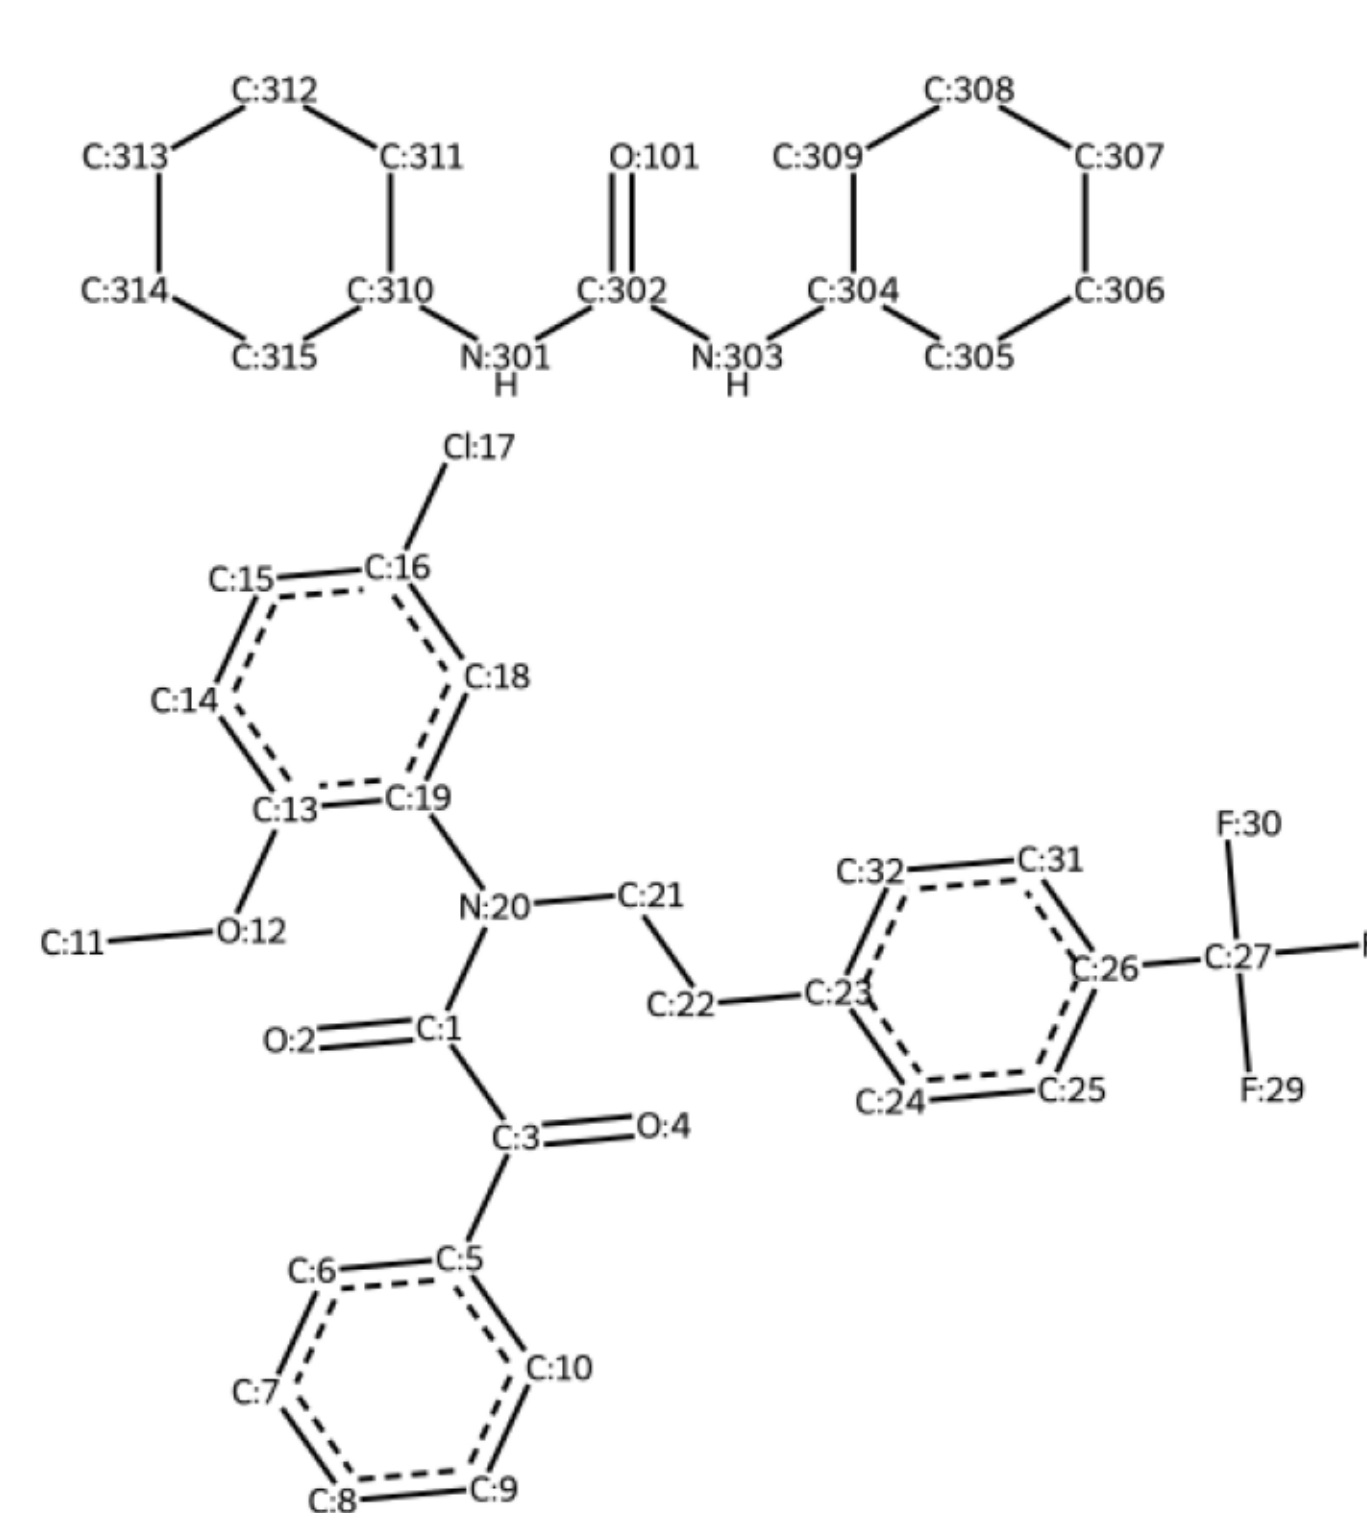



Original reaction  
sampled RXN\_ID:23)

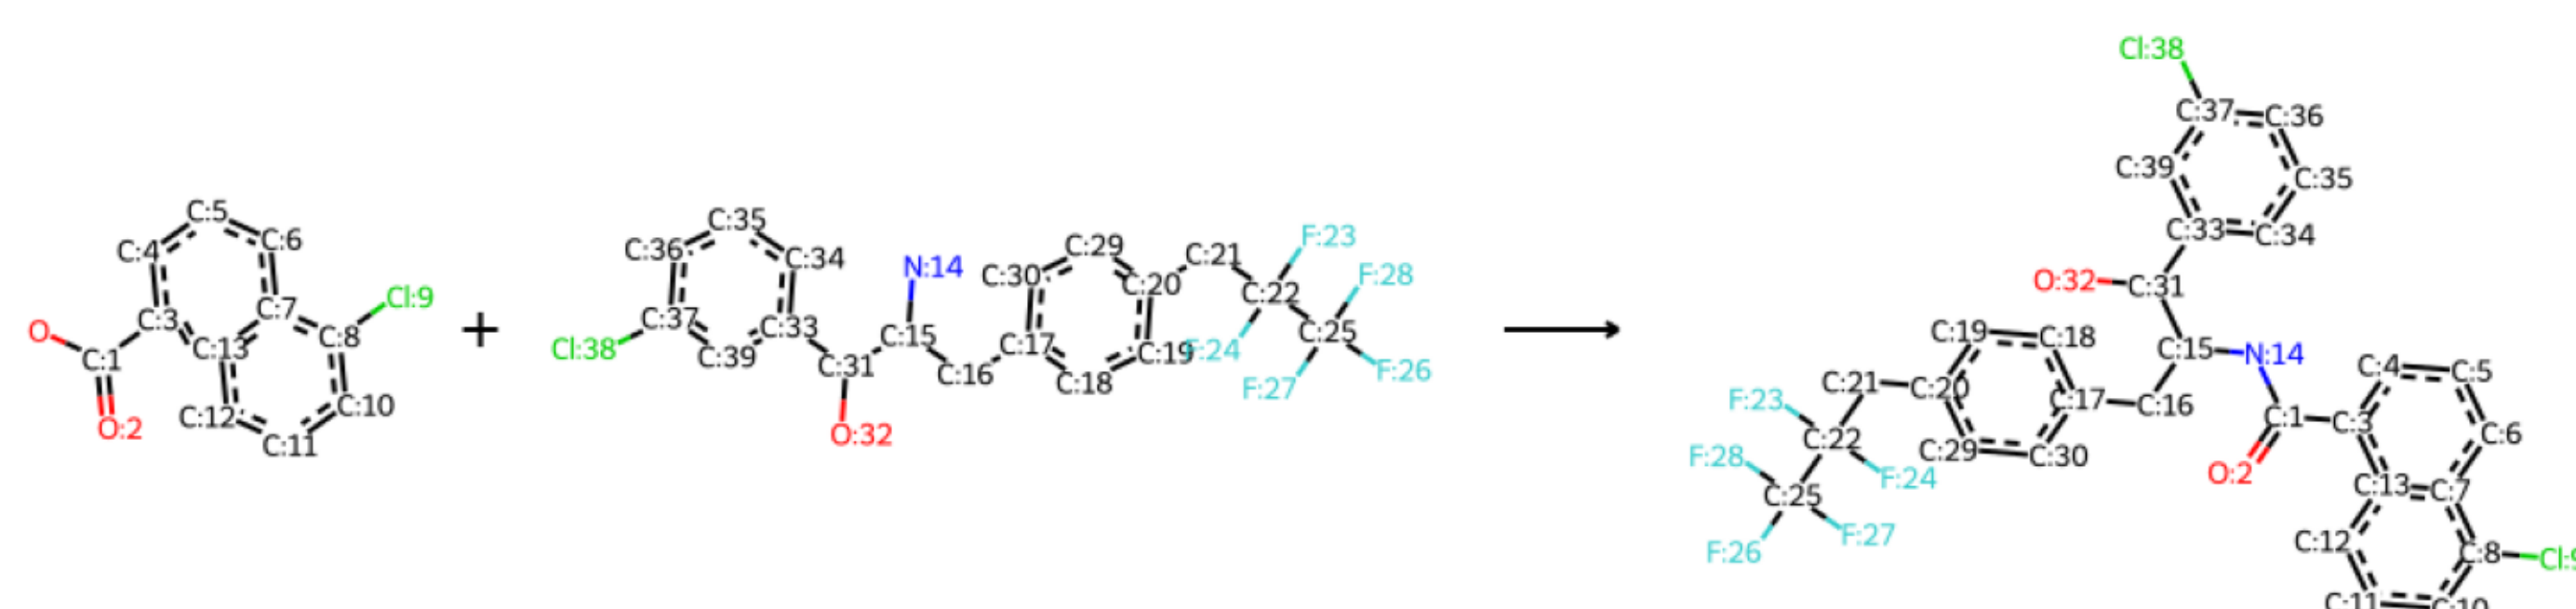

Identified mechanistic class -  
DCC\_condensation reaction

Reaction with missing reagents recovered

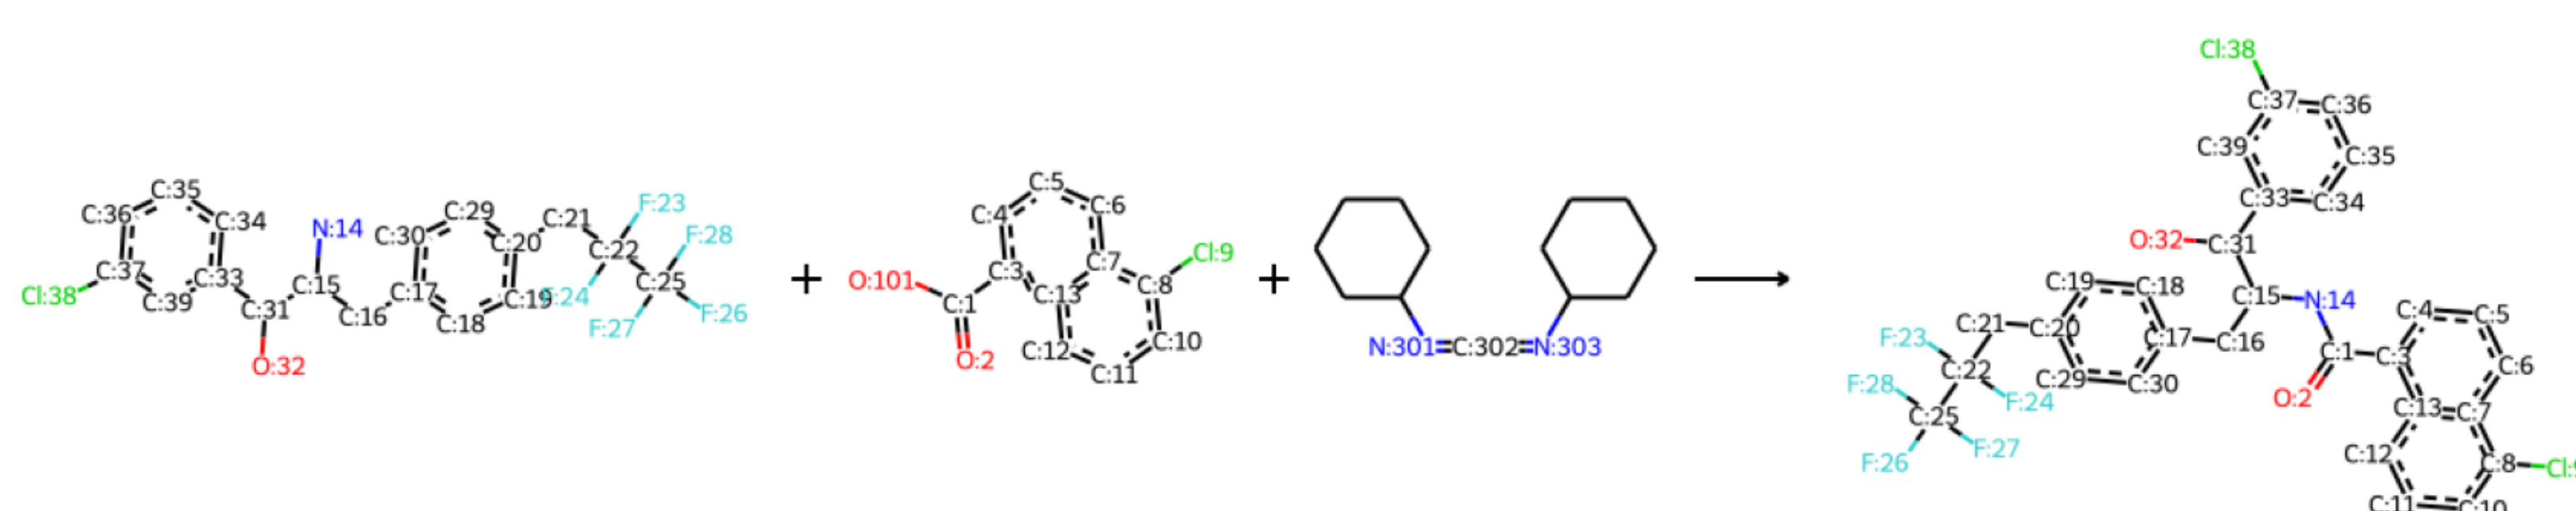

Proposed mechanistic pathway

[Arrow order: (1) green, (2) blue, (3) red, (4) orange]

step #1

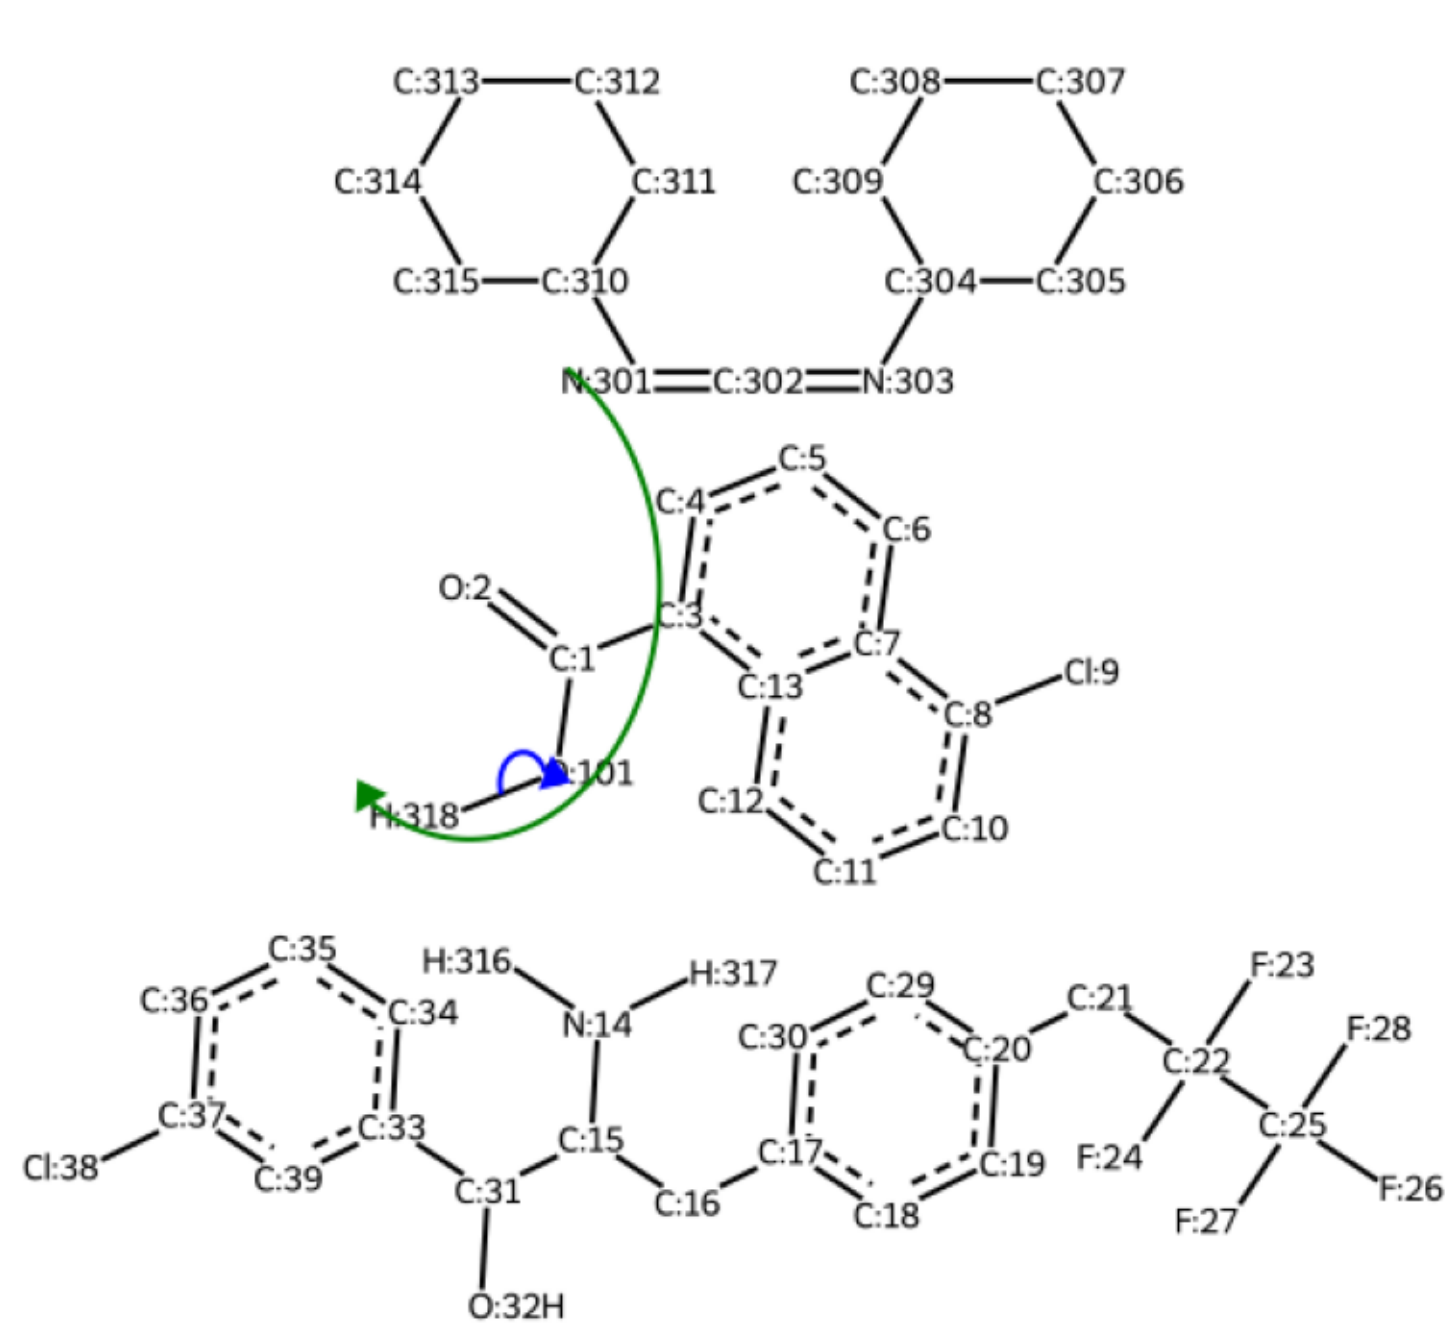

step #2

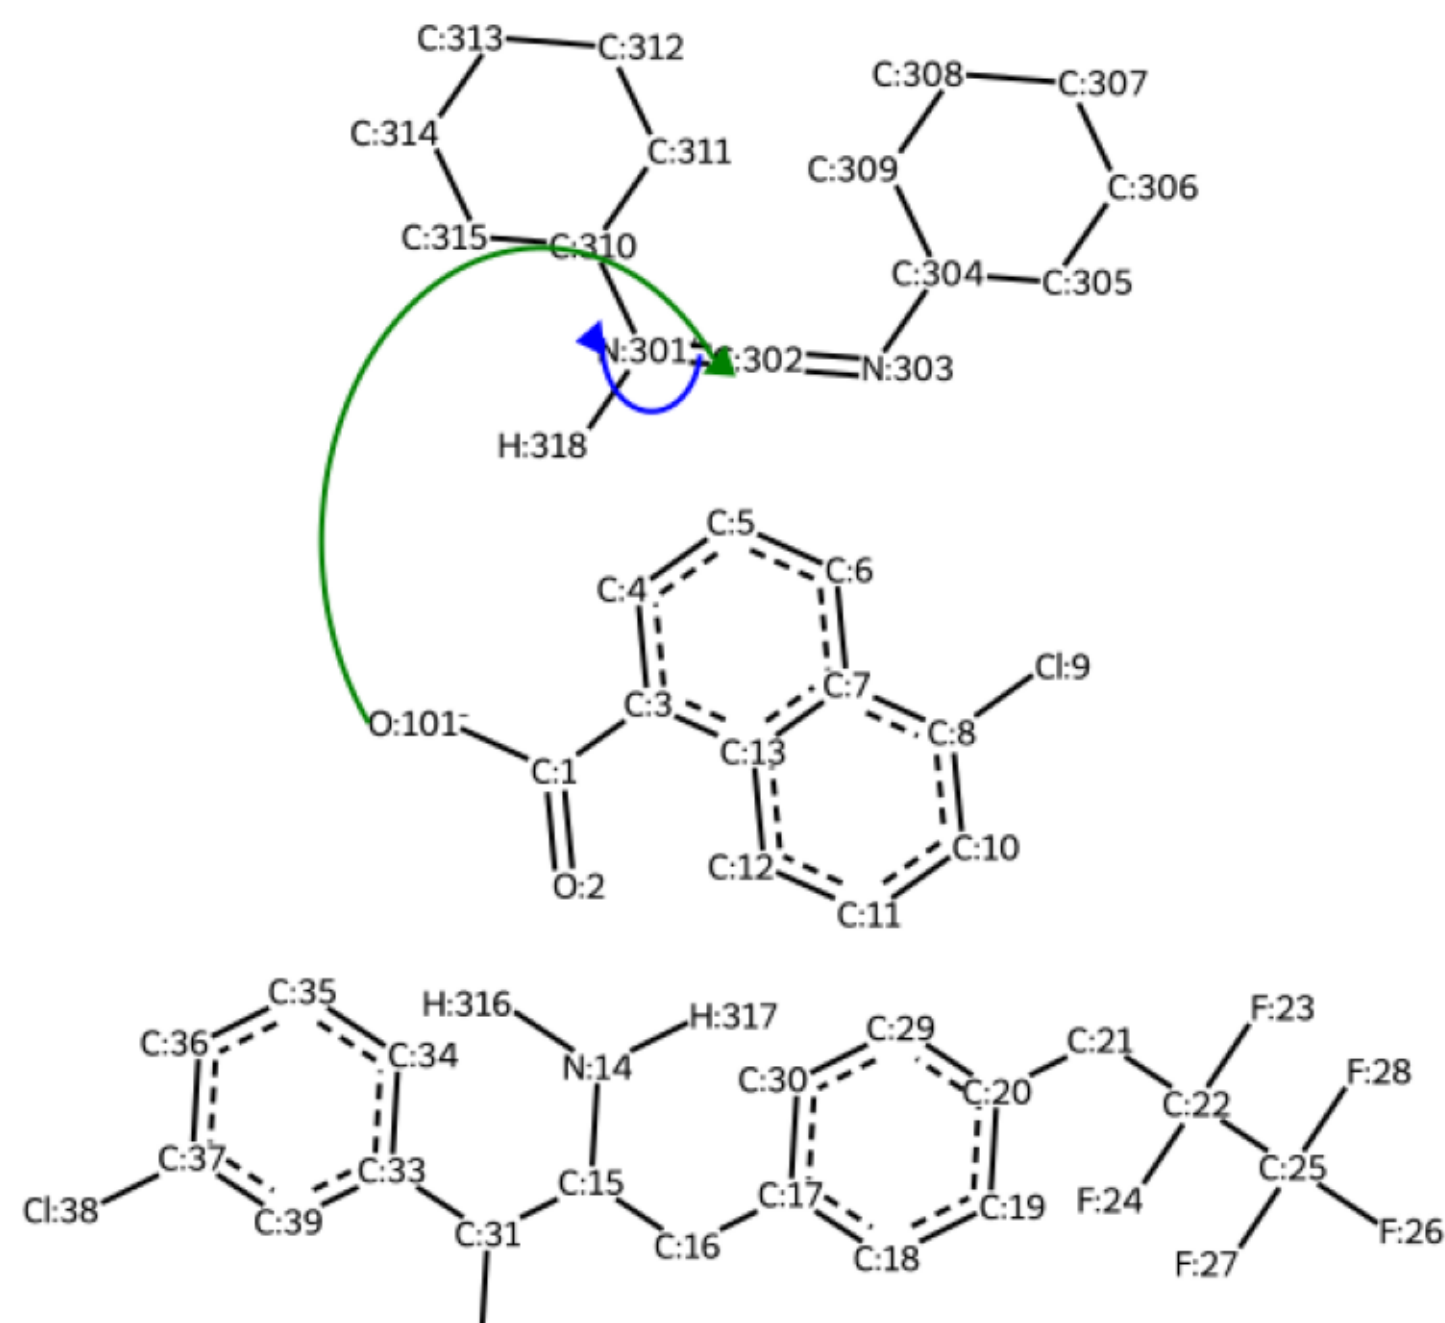

step #3

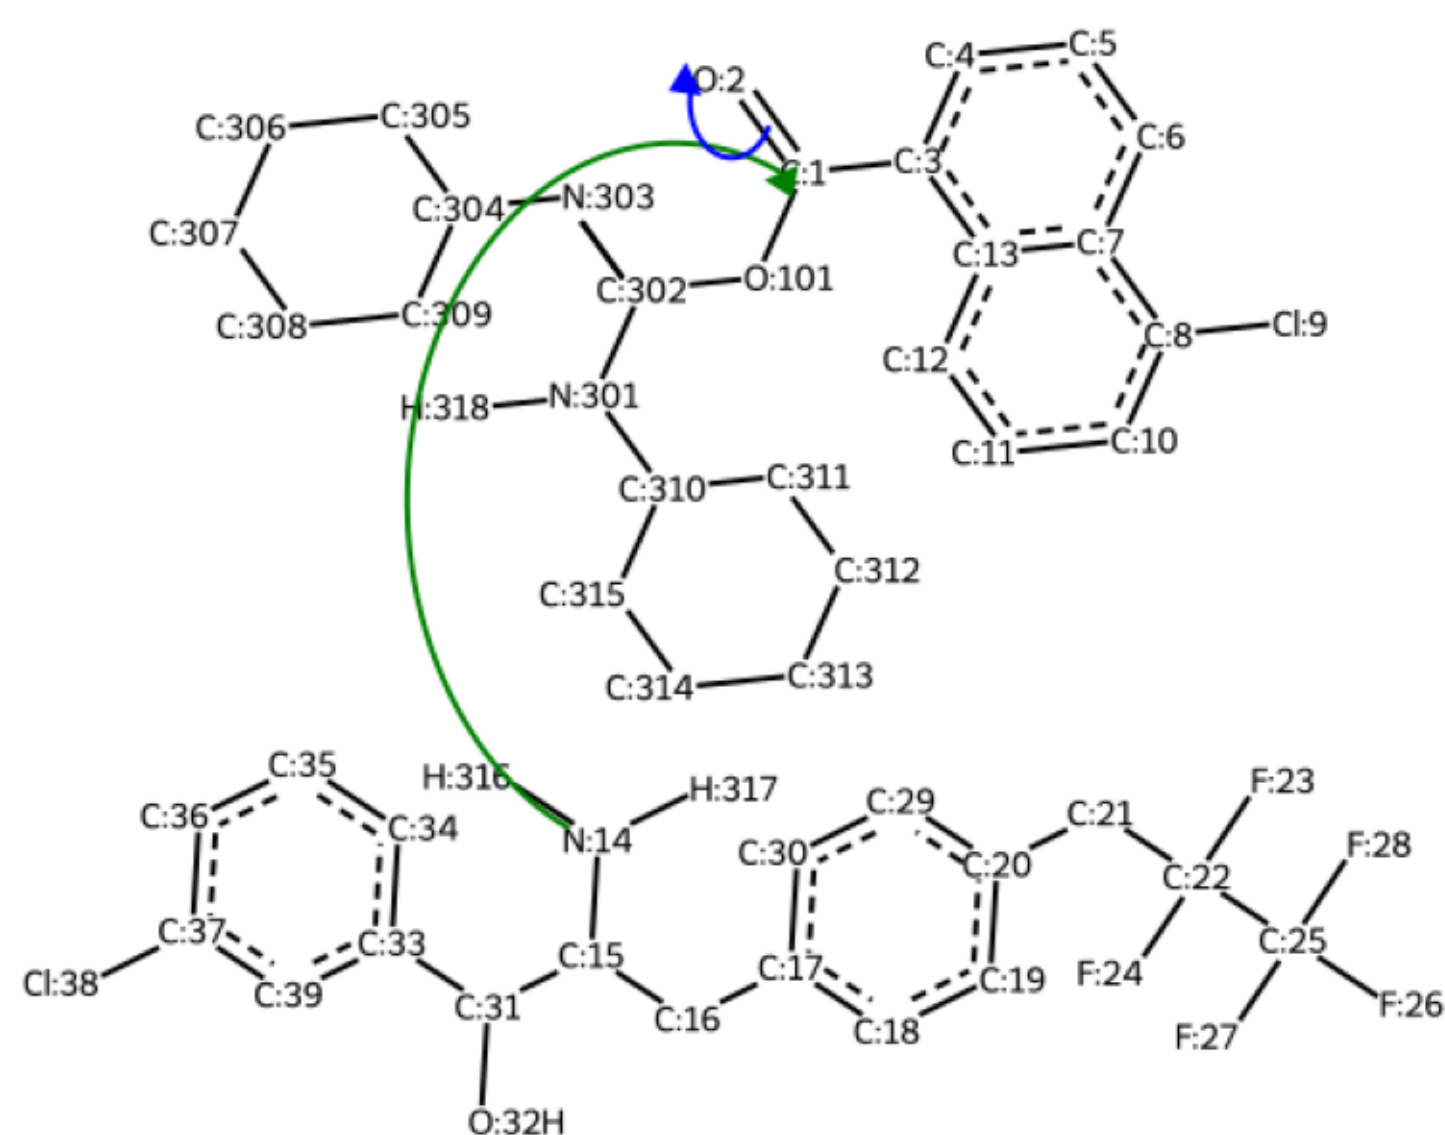

step #4

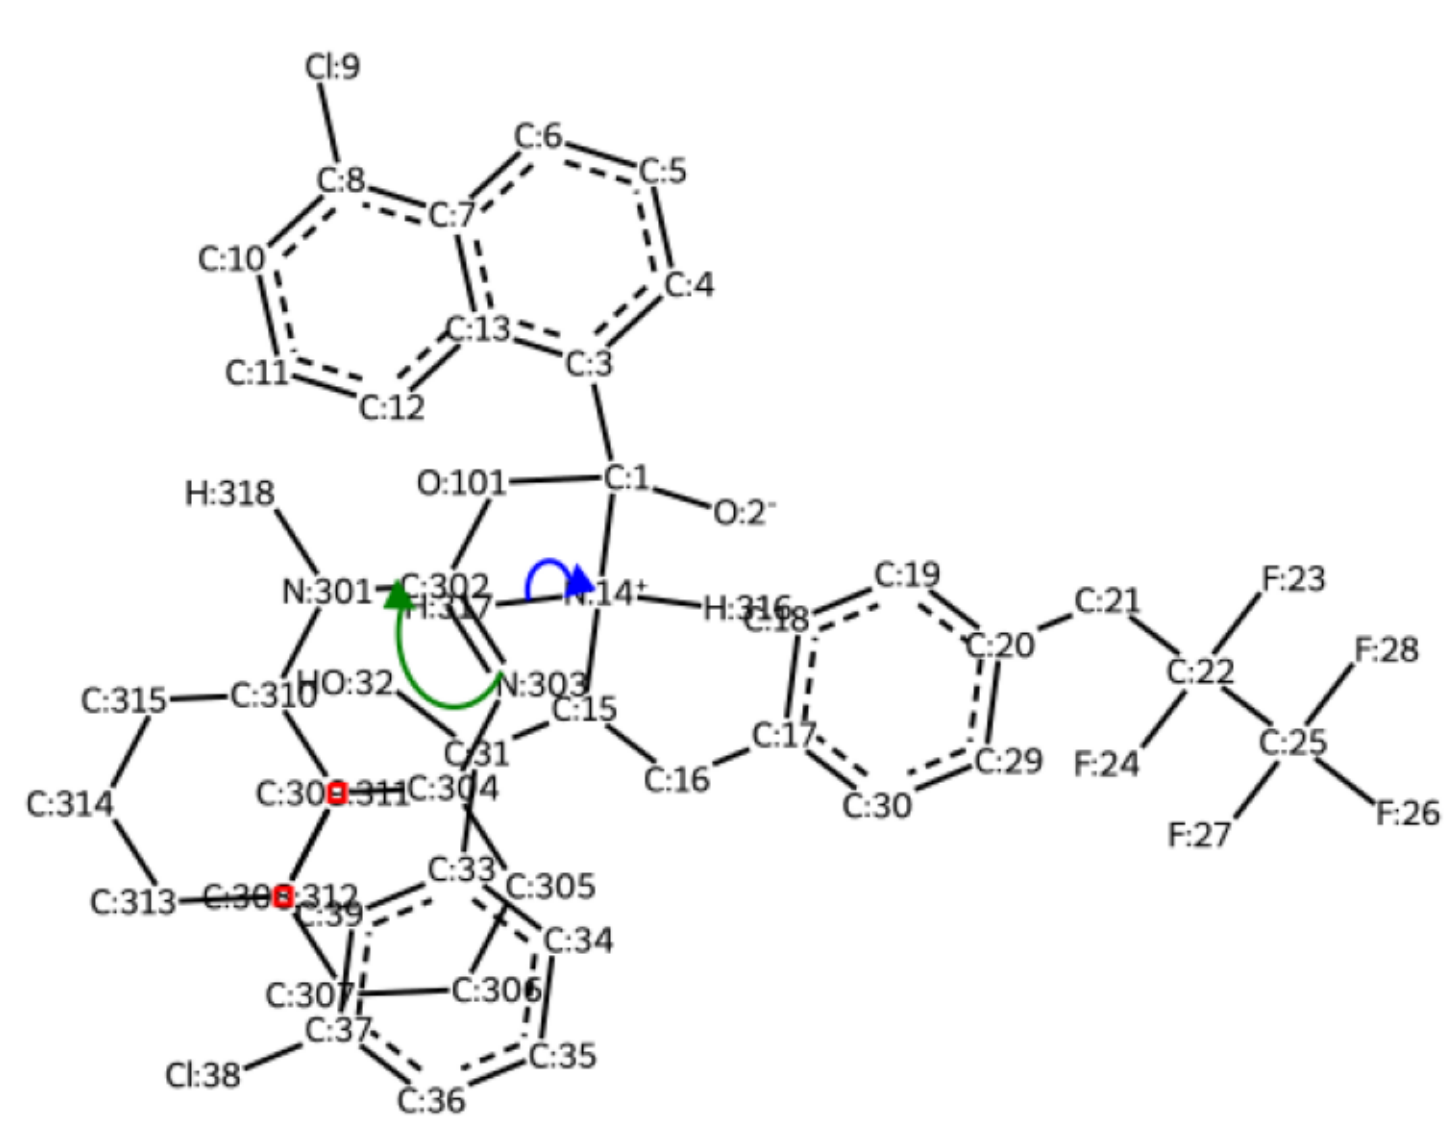

step #5

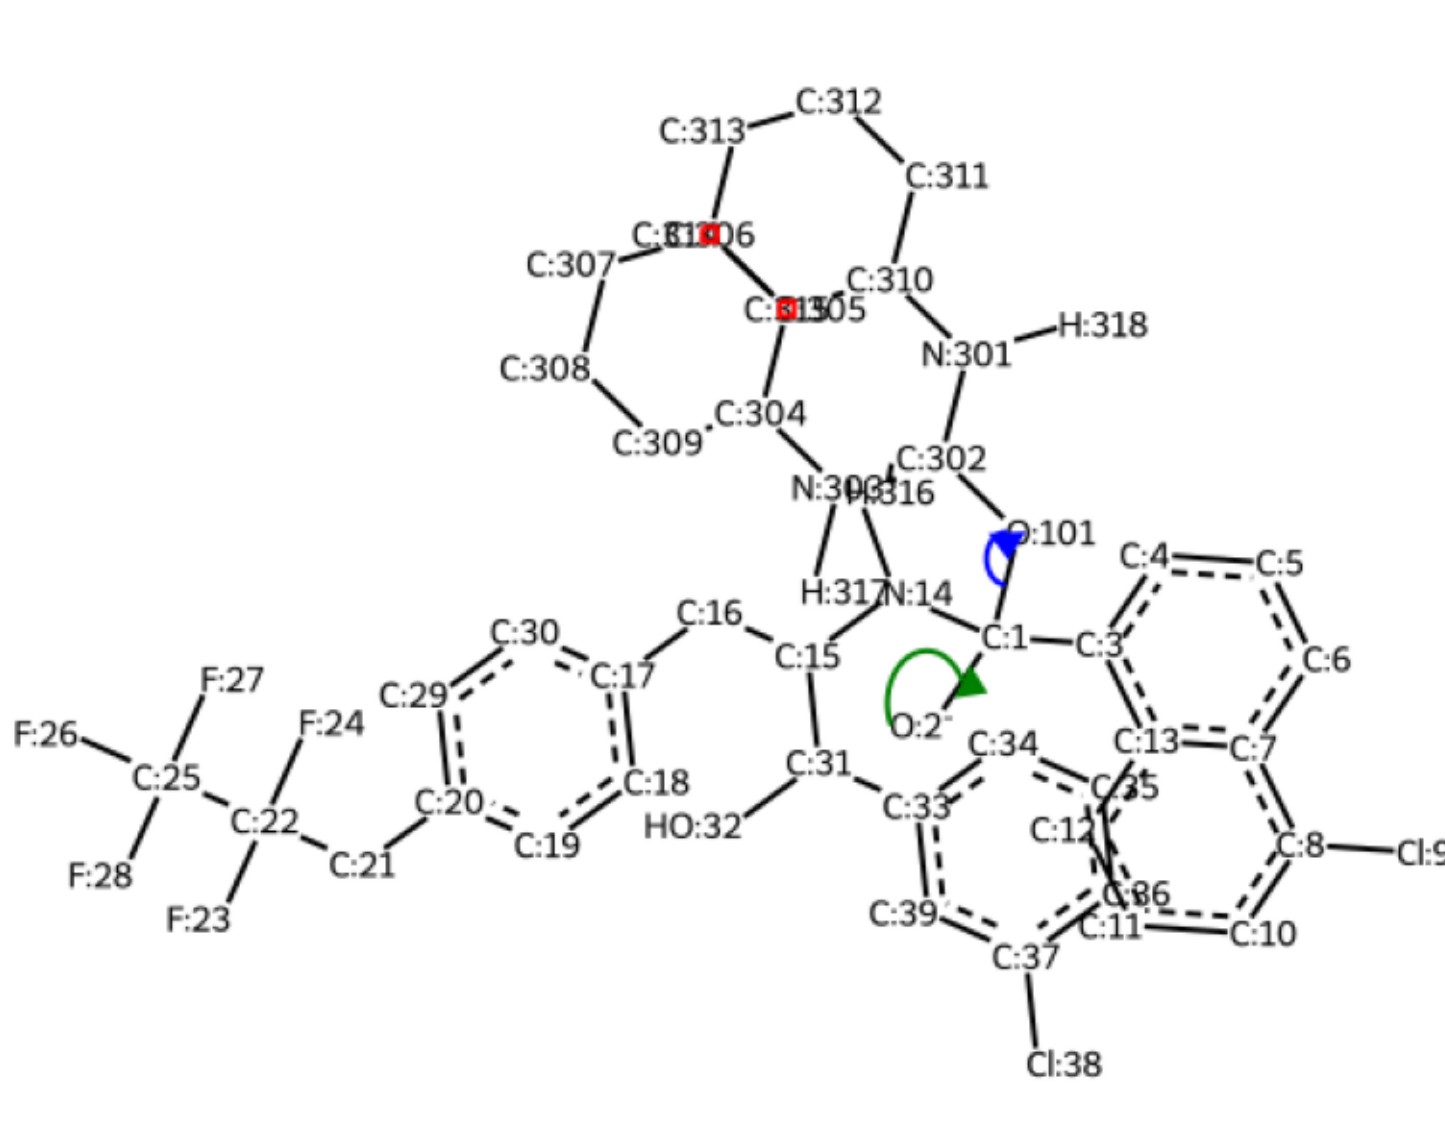

step #6

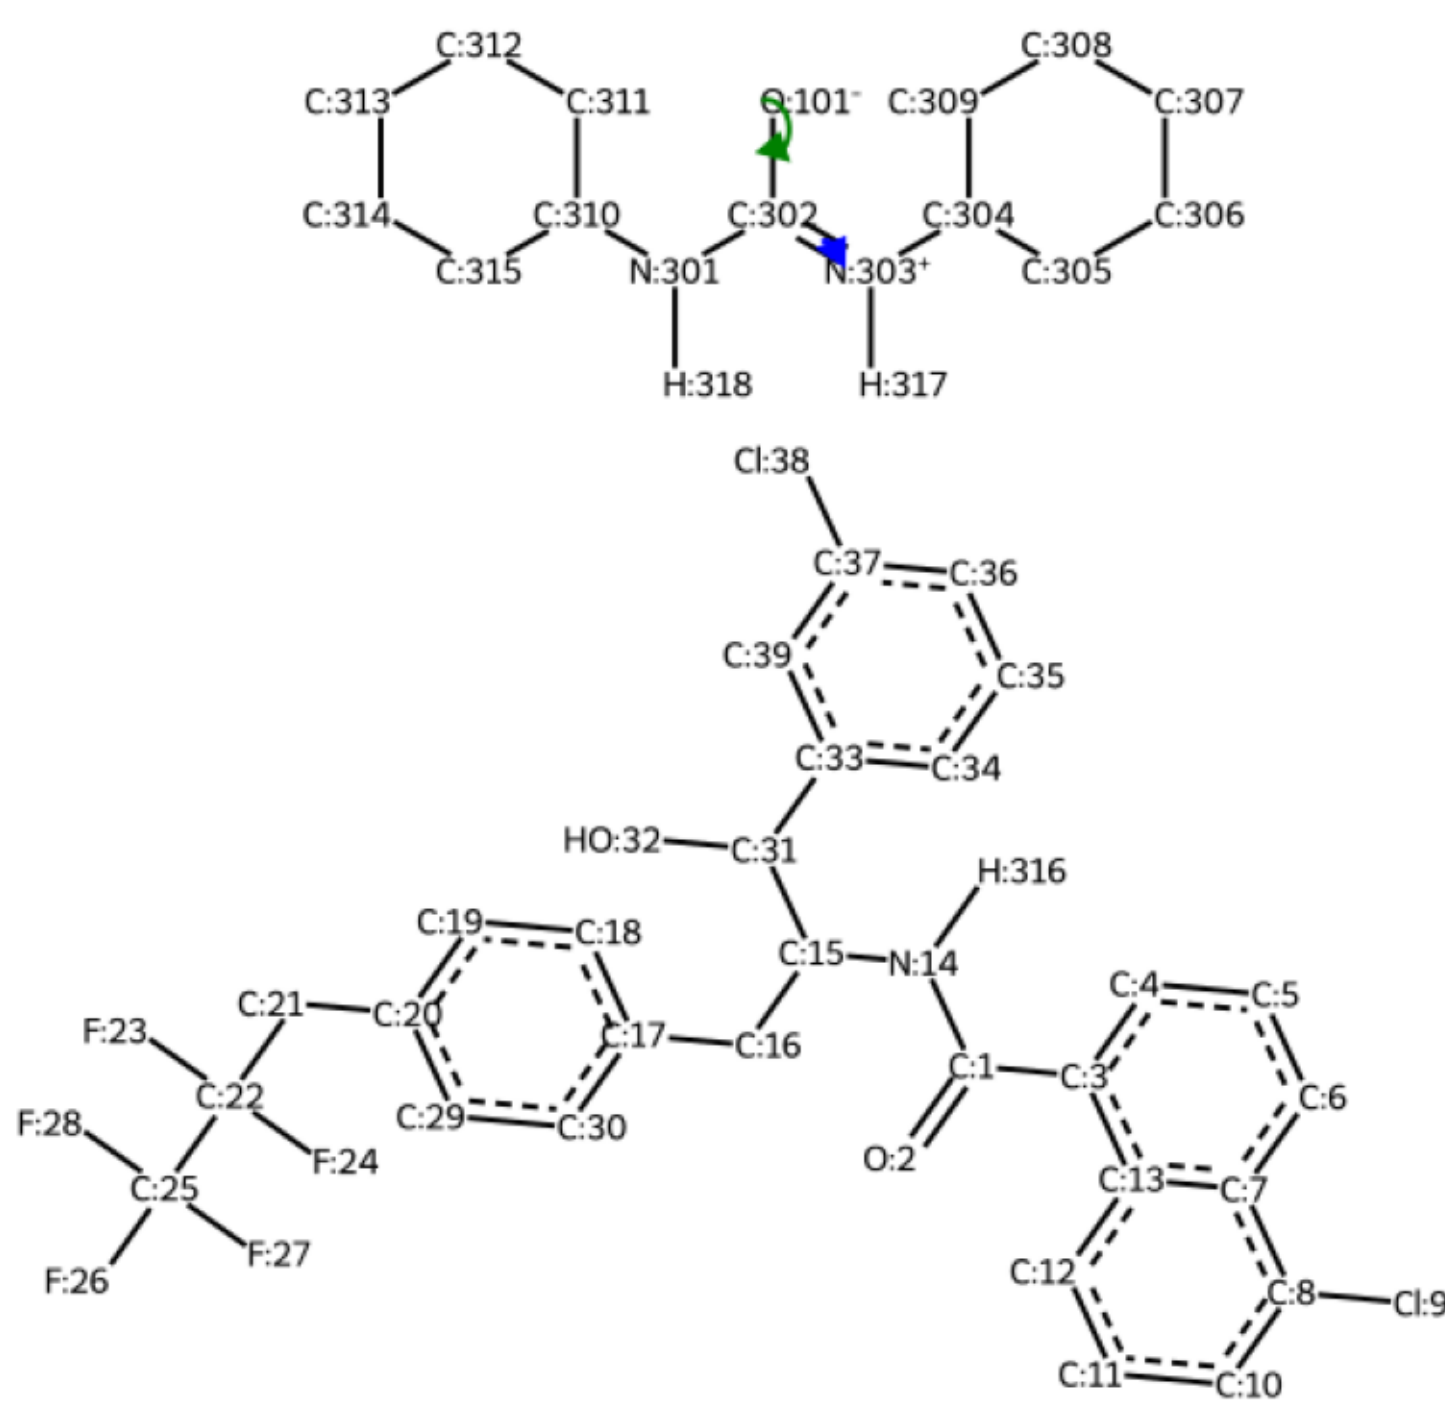

Product(s)

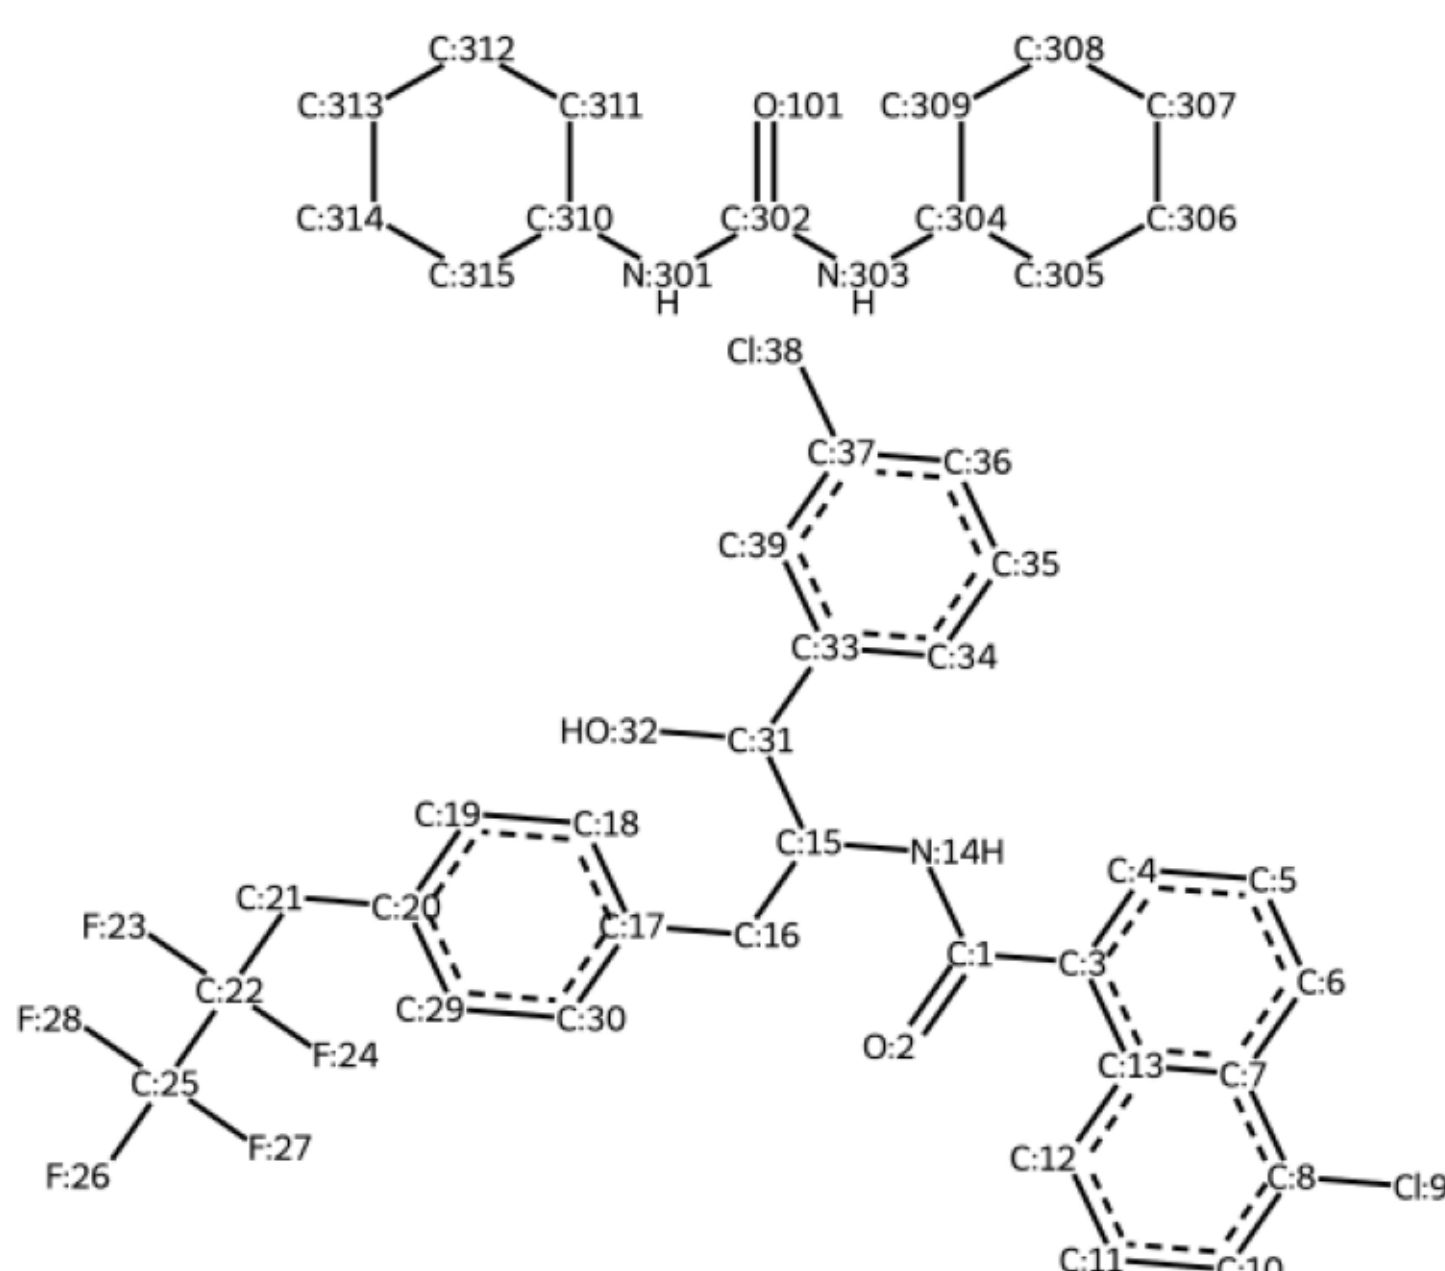



Original reaction  
sampled RXN\_ID:24)

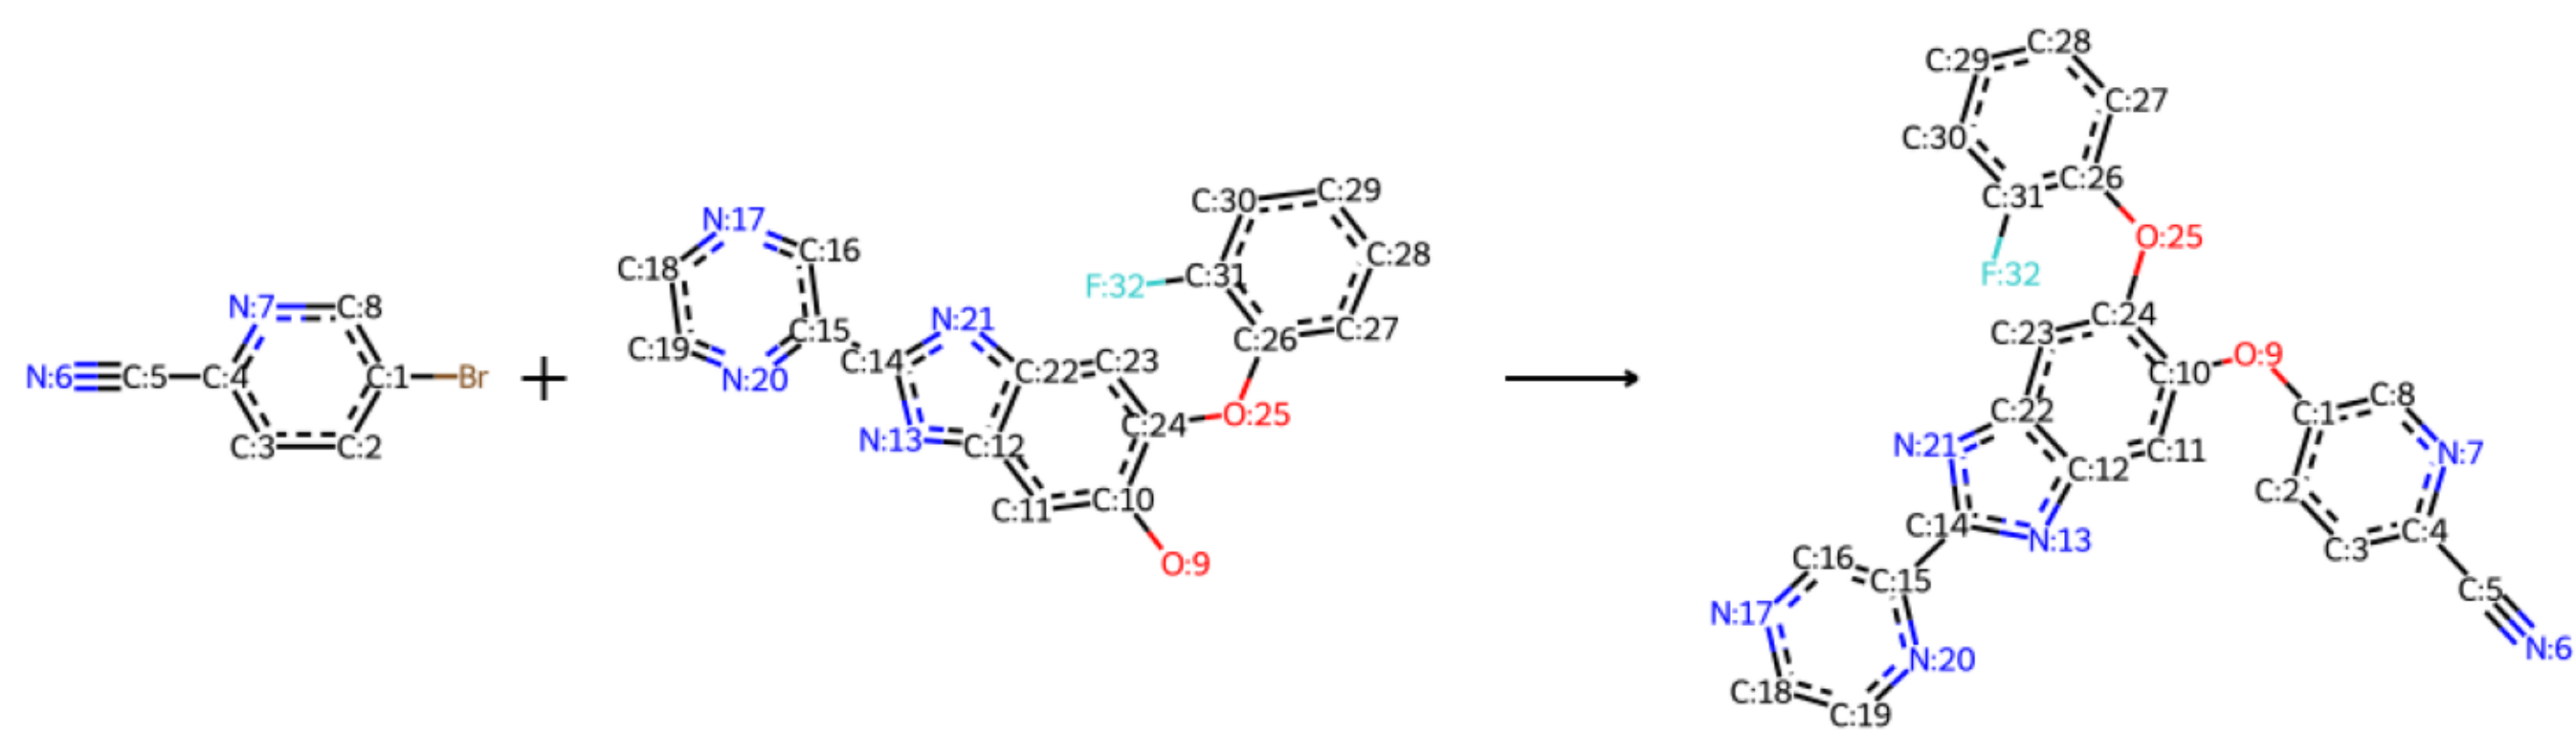

Identified mechanistic class -  
S<sub>N</sub>Ar<sub>alco(thi)ol(para)</sub> reaction

Reaction with missing reagents recovered

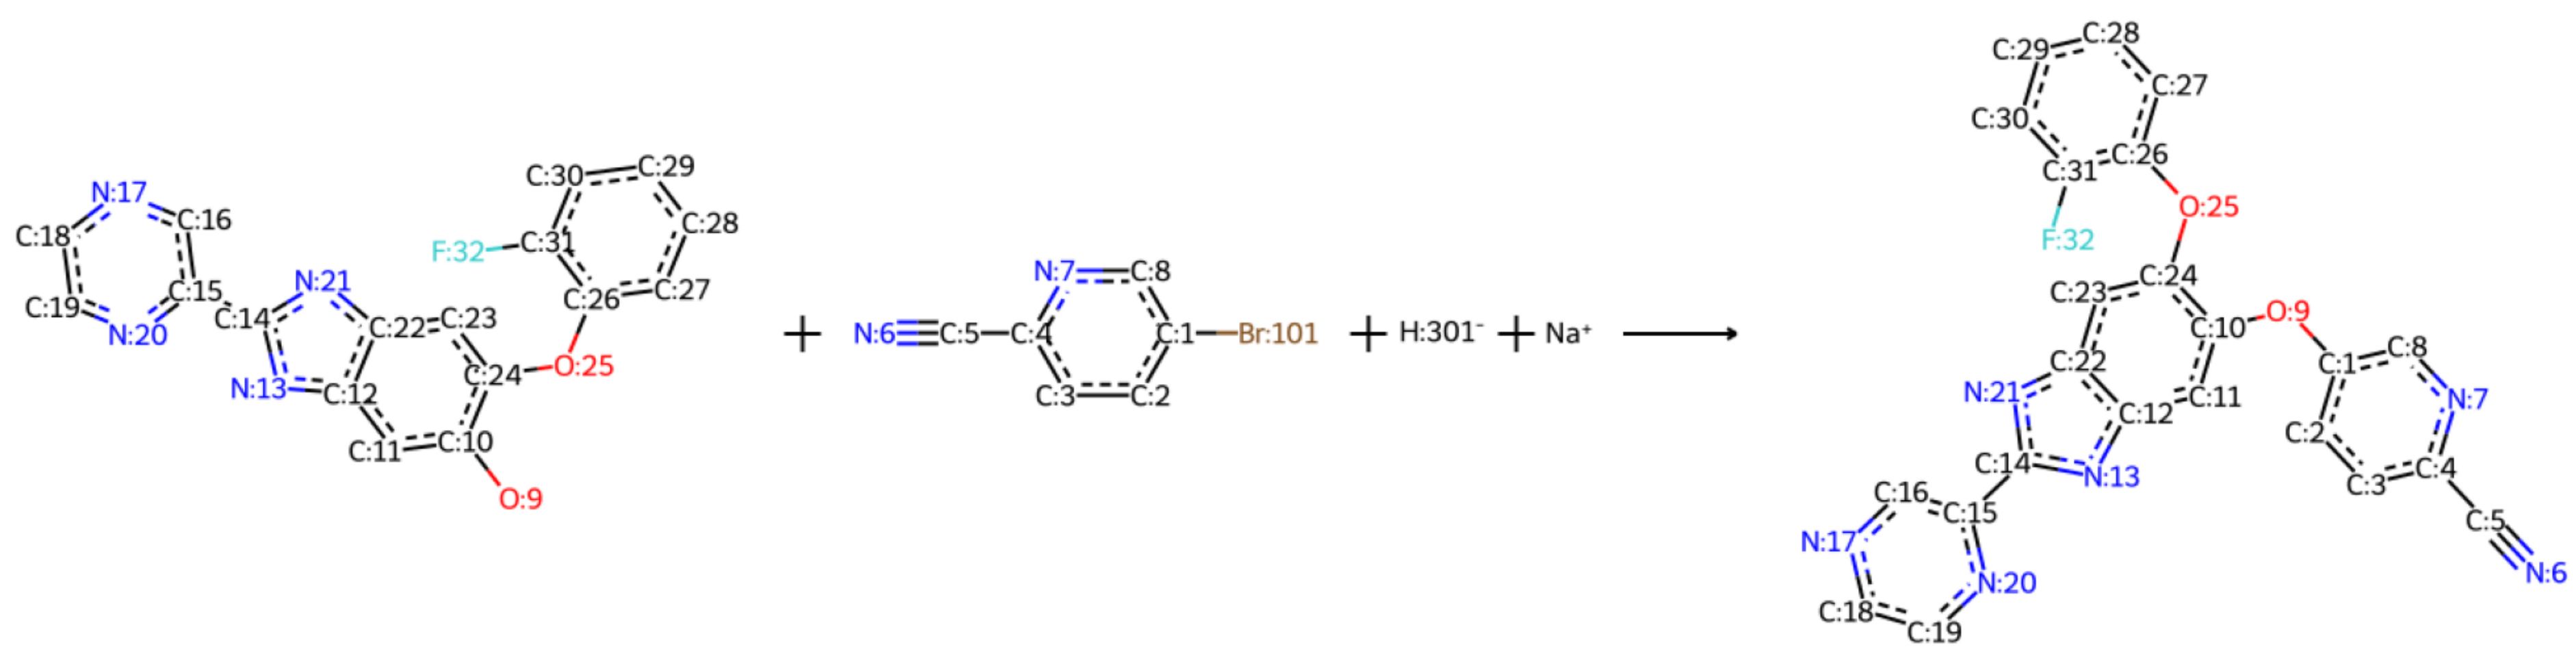

Proposed mechanistic pathway

[Arrow order: (1) green, (2) blue, (3) red, (4) orange]

step #1

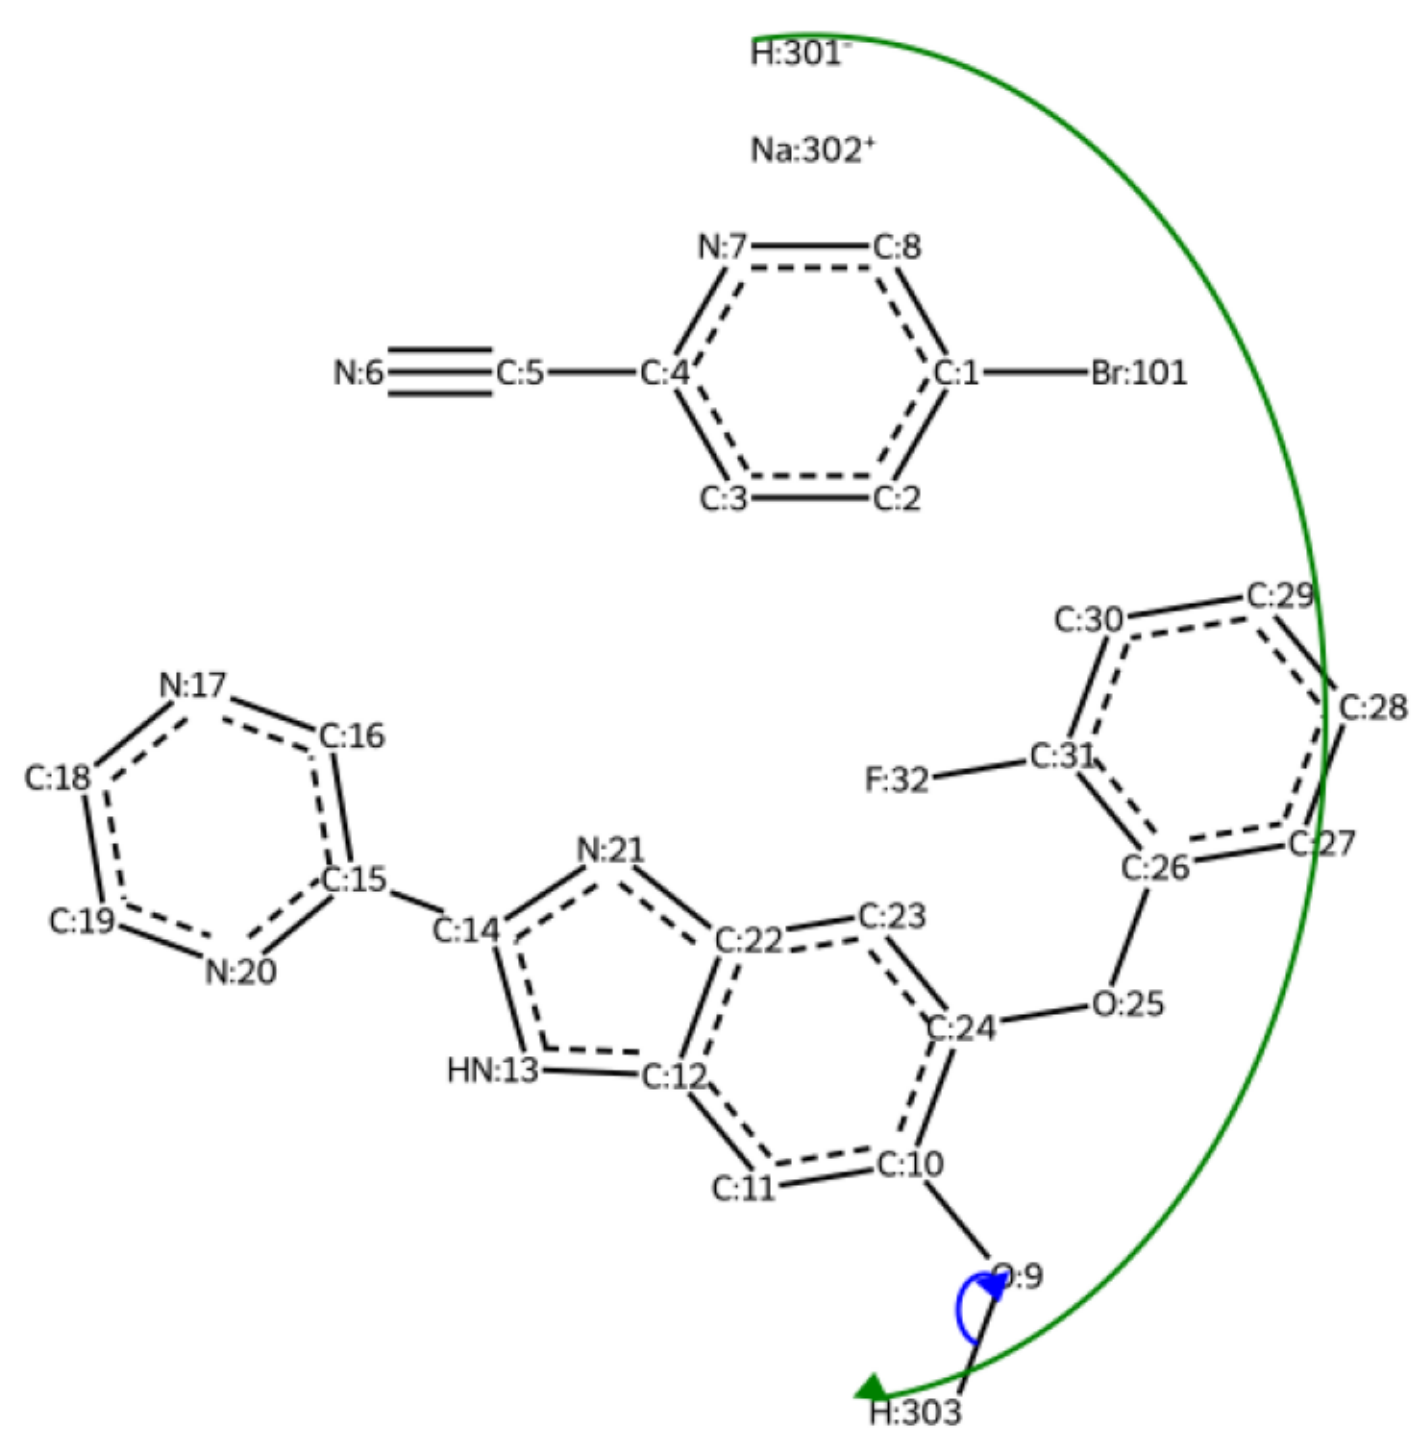

step #2

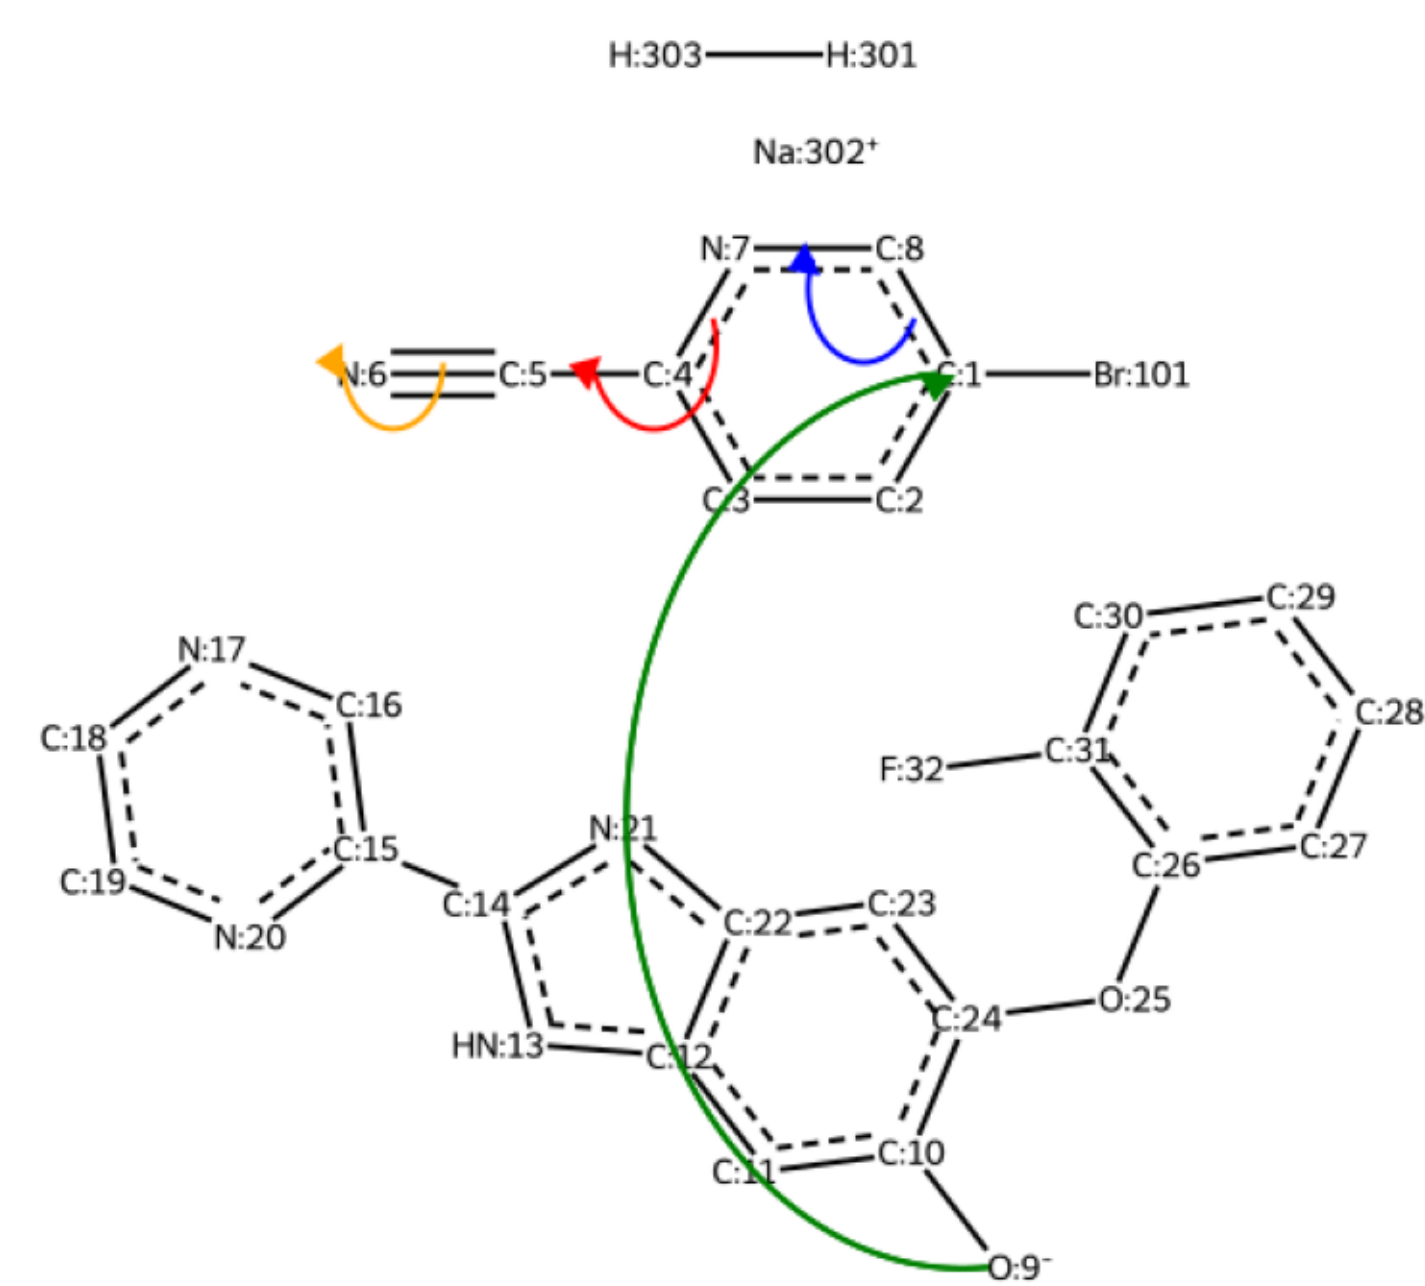

step #3

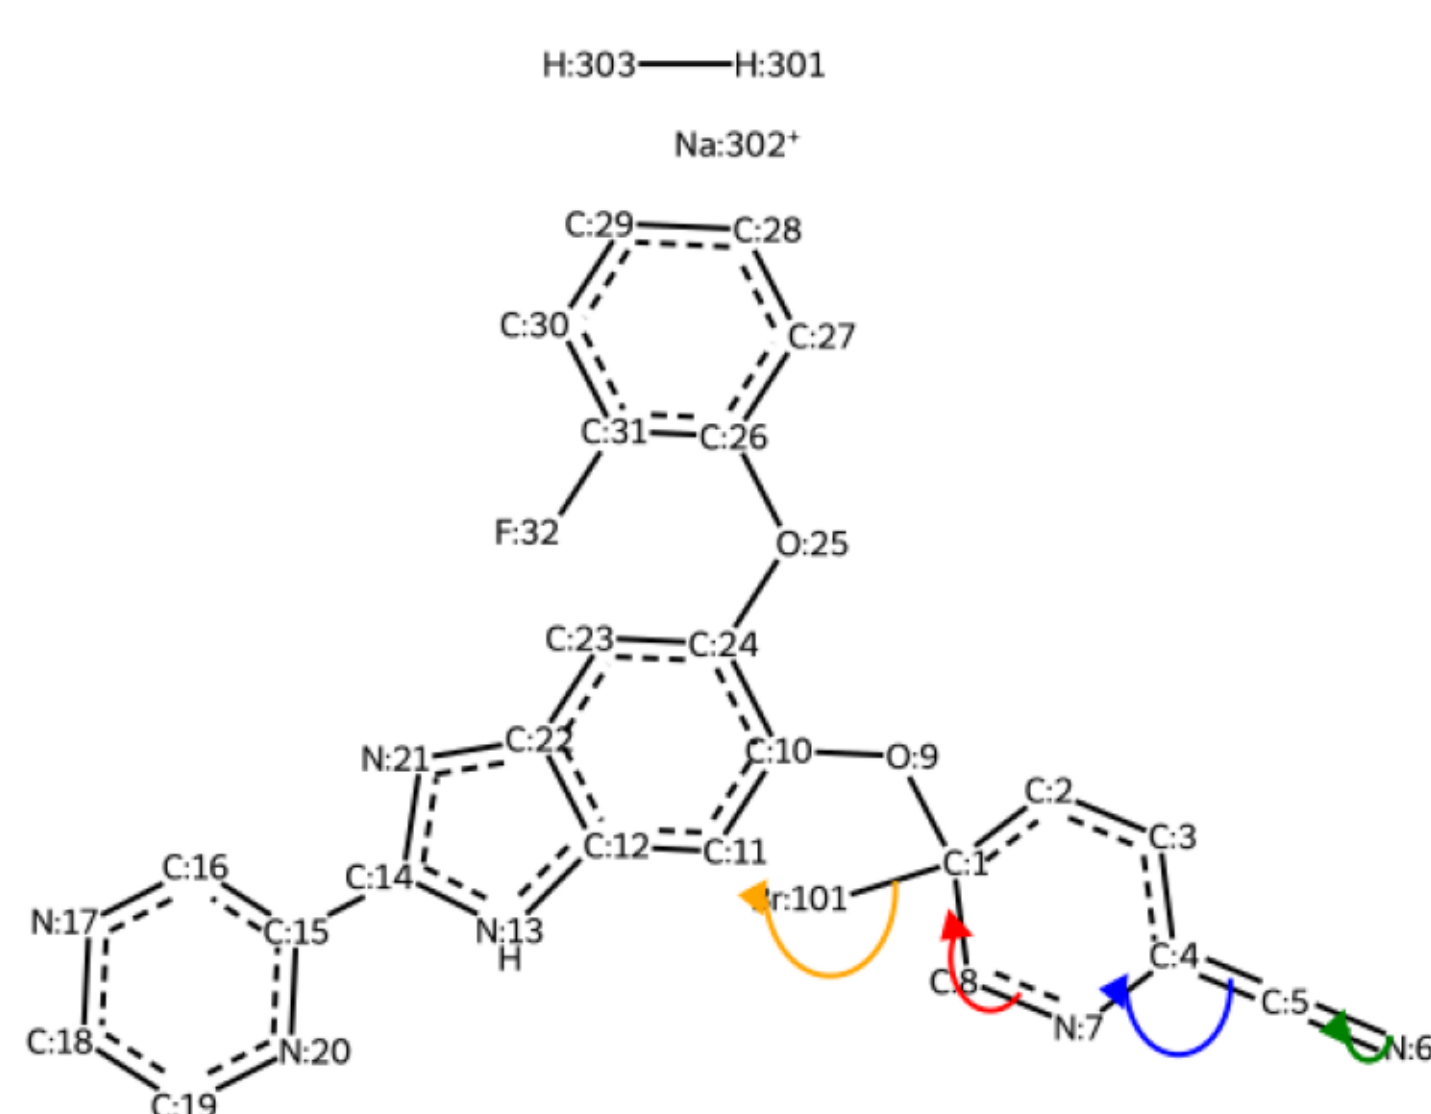

Product(s)

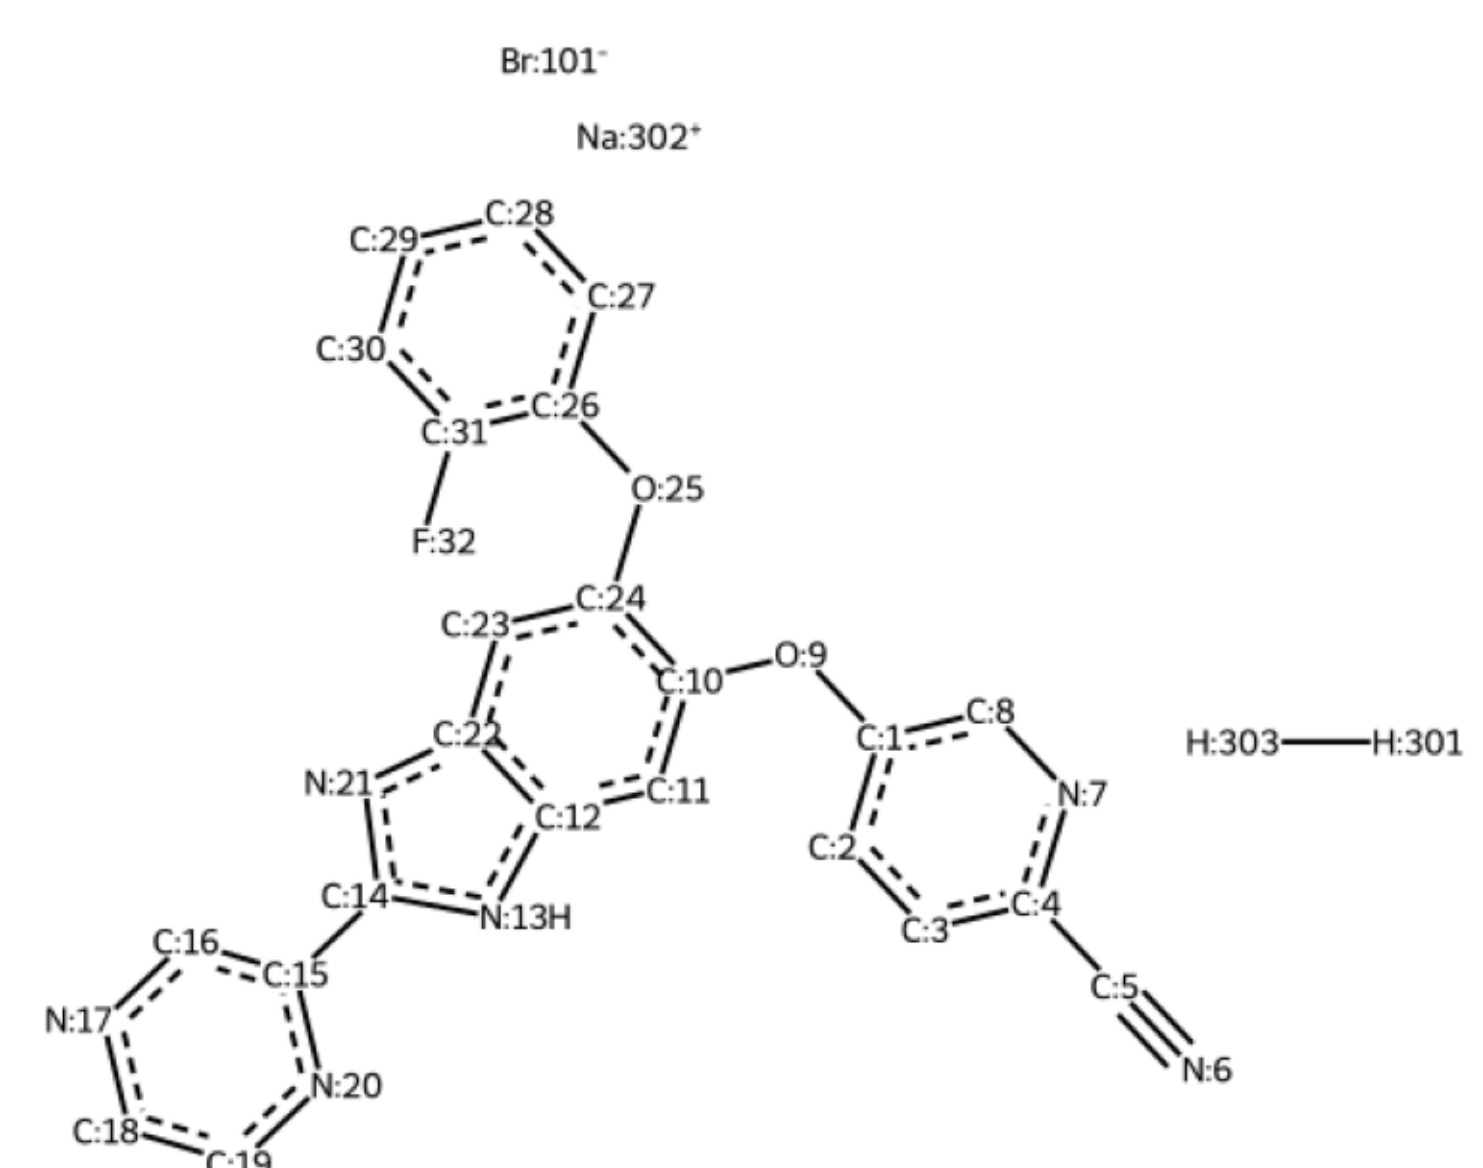



Original reaction  
sampled RXN\_ID:25)

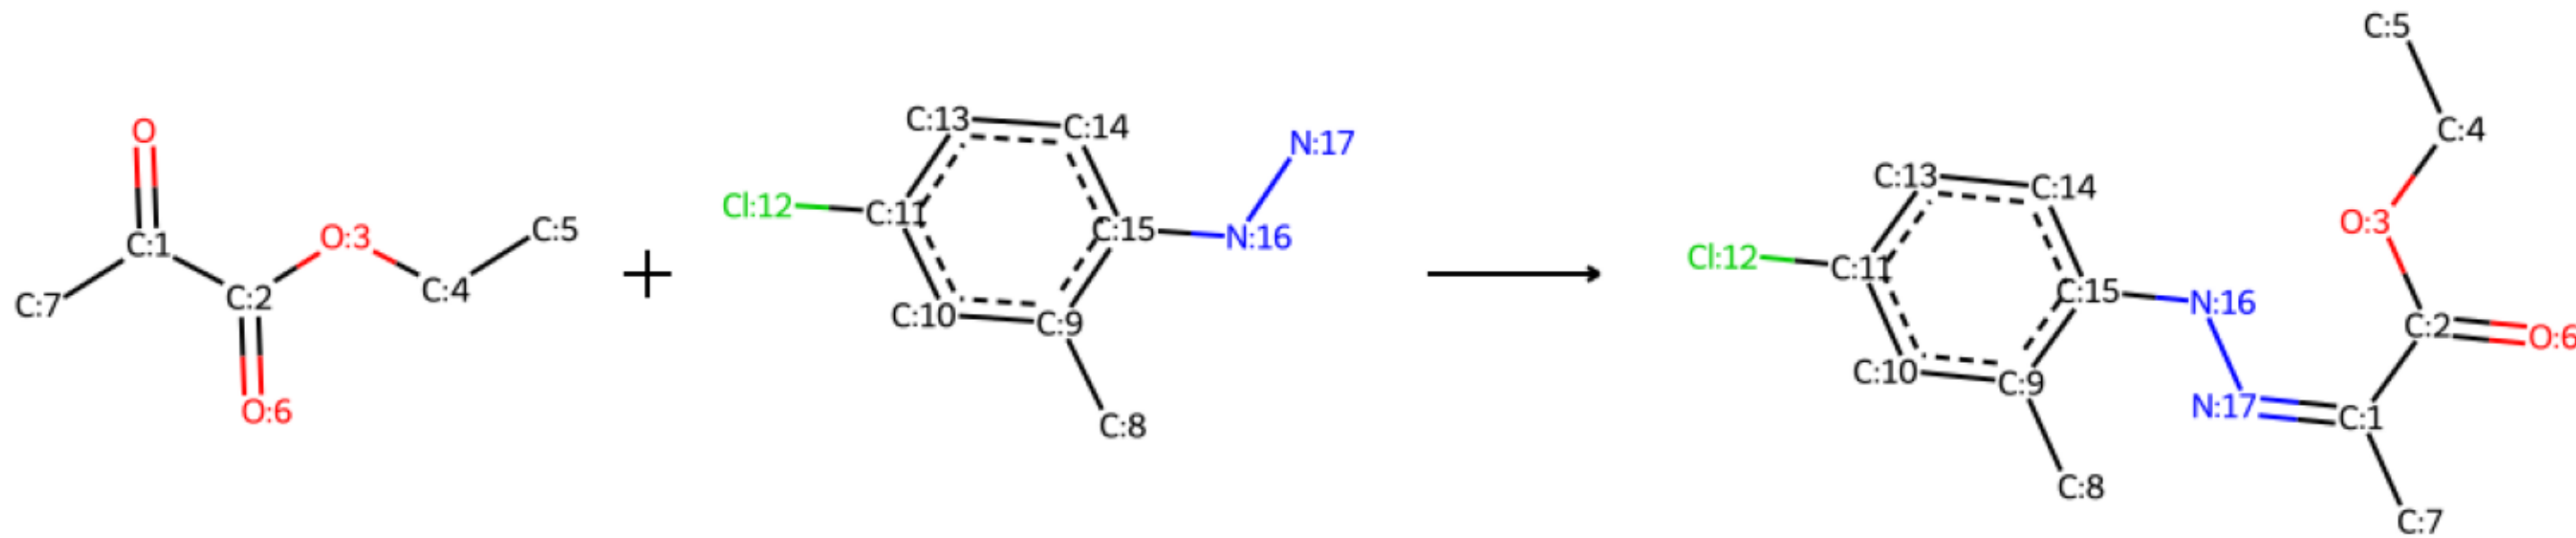

Identified mechanistic class -  
imine\_formation reaction

Reaction with missing reagents recovered

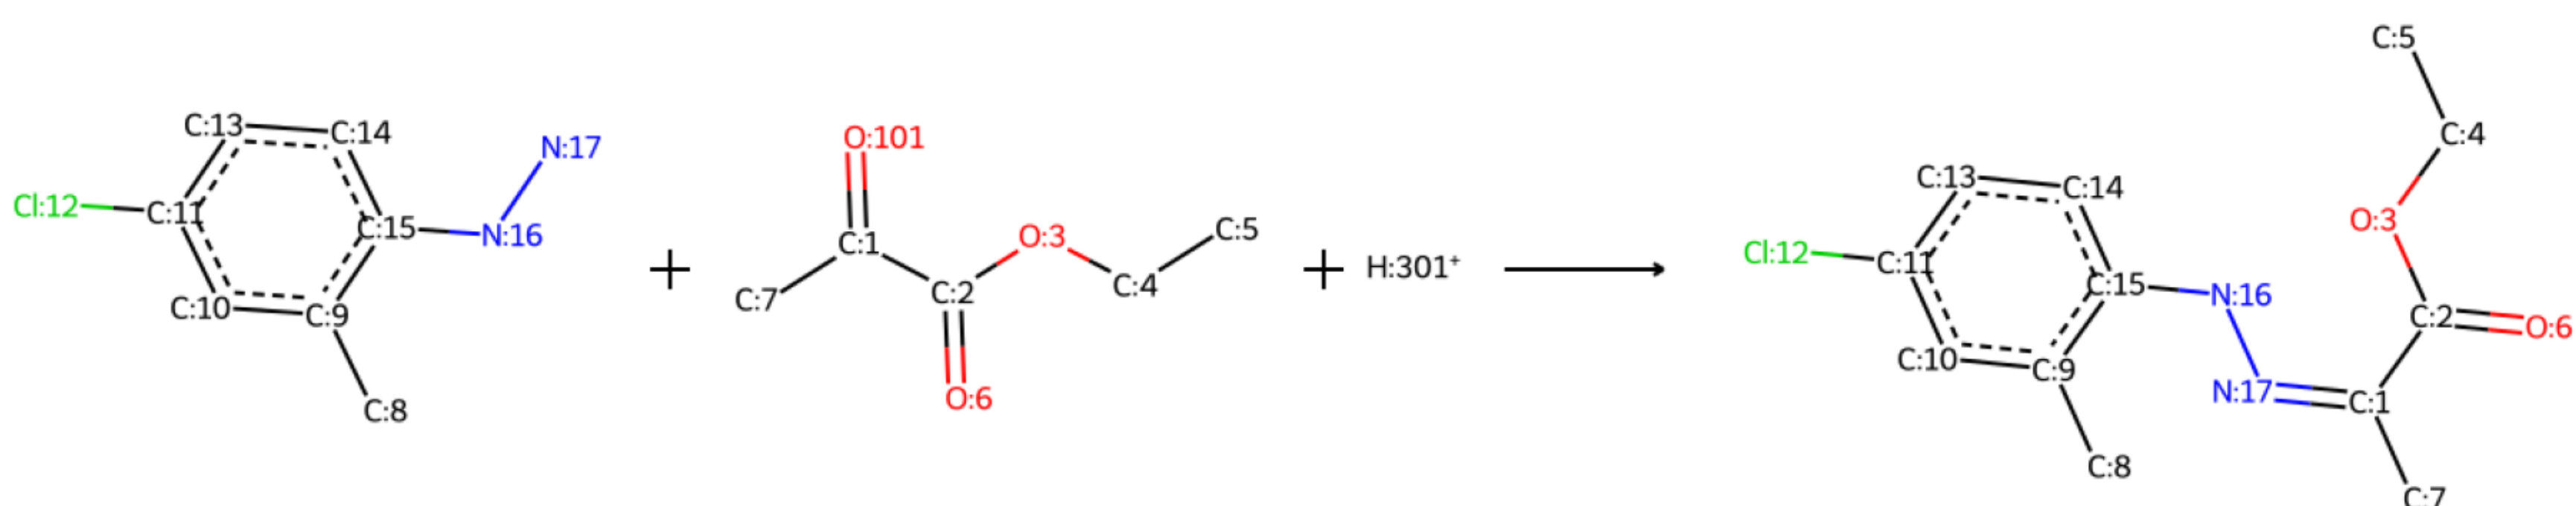

Proposed mechanistic pathway

[Arrow order: (1) green, (2) blue, (3) red, (4) orange]

step #1

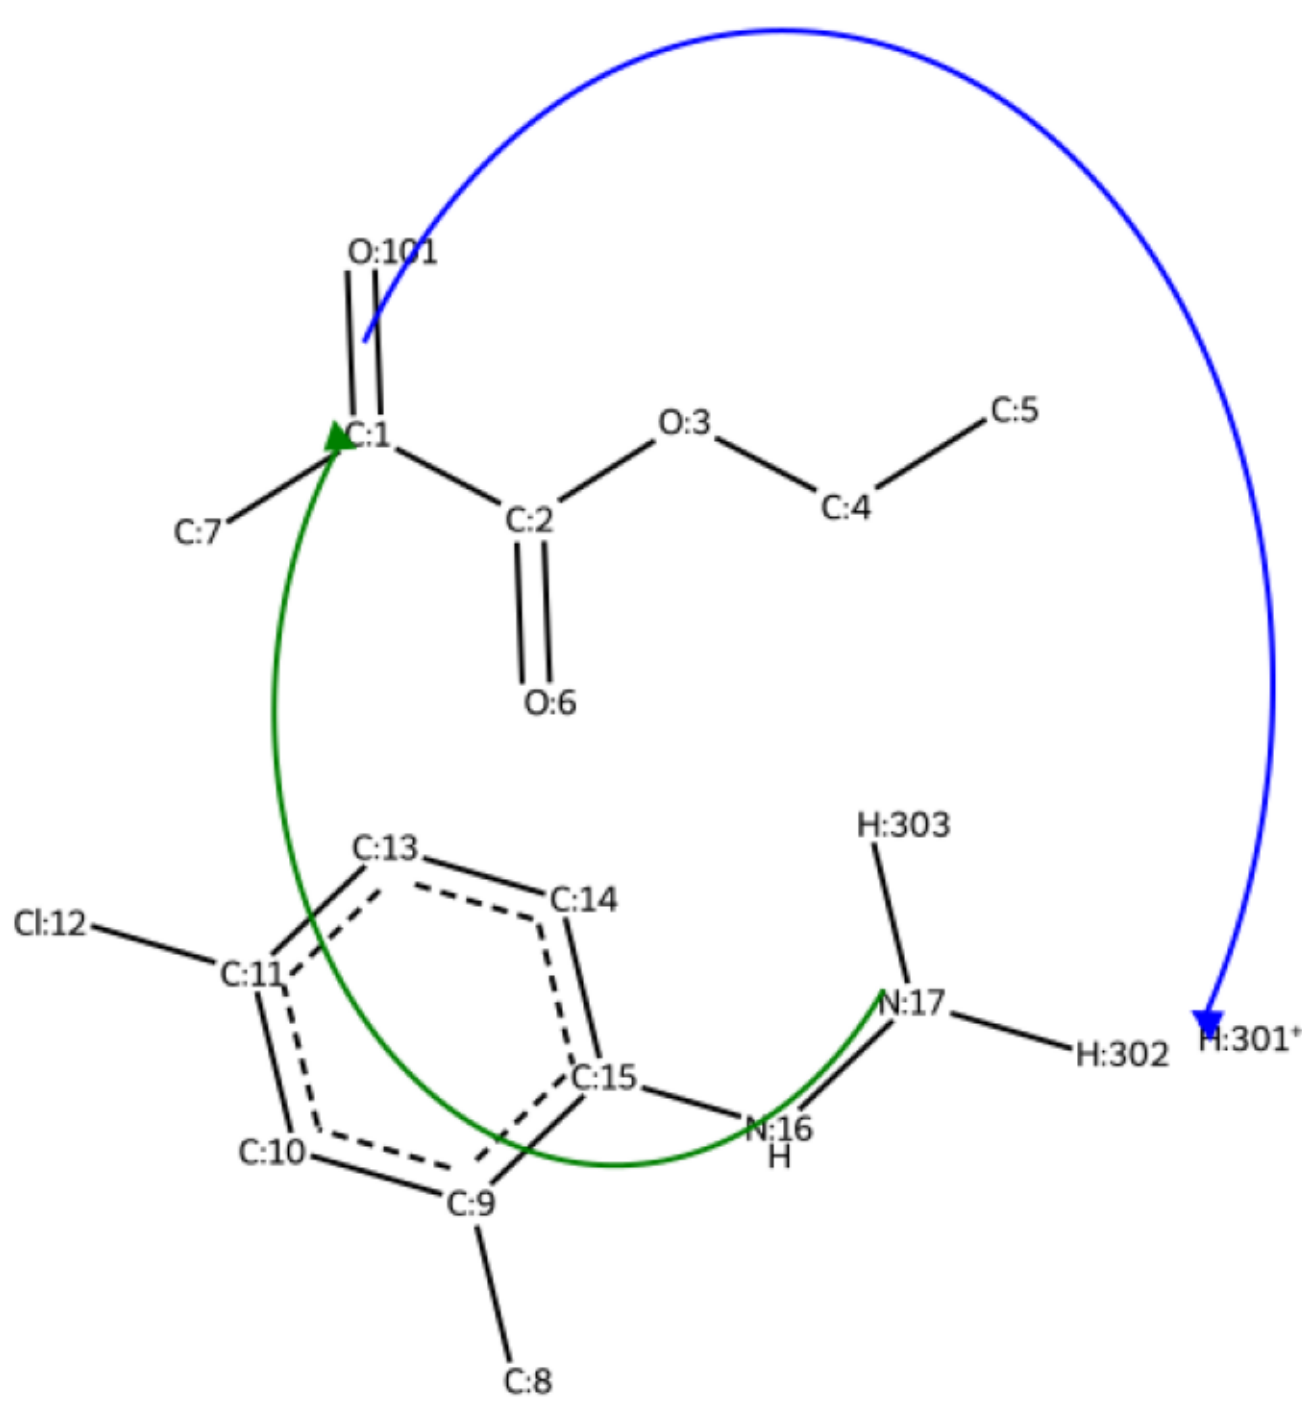

step #2

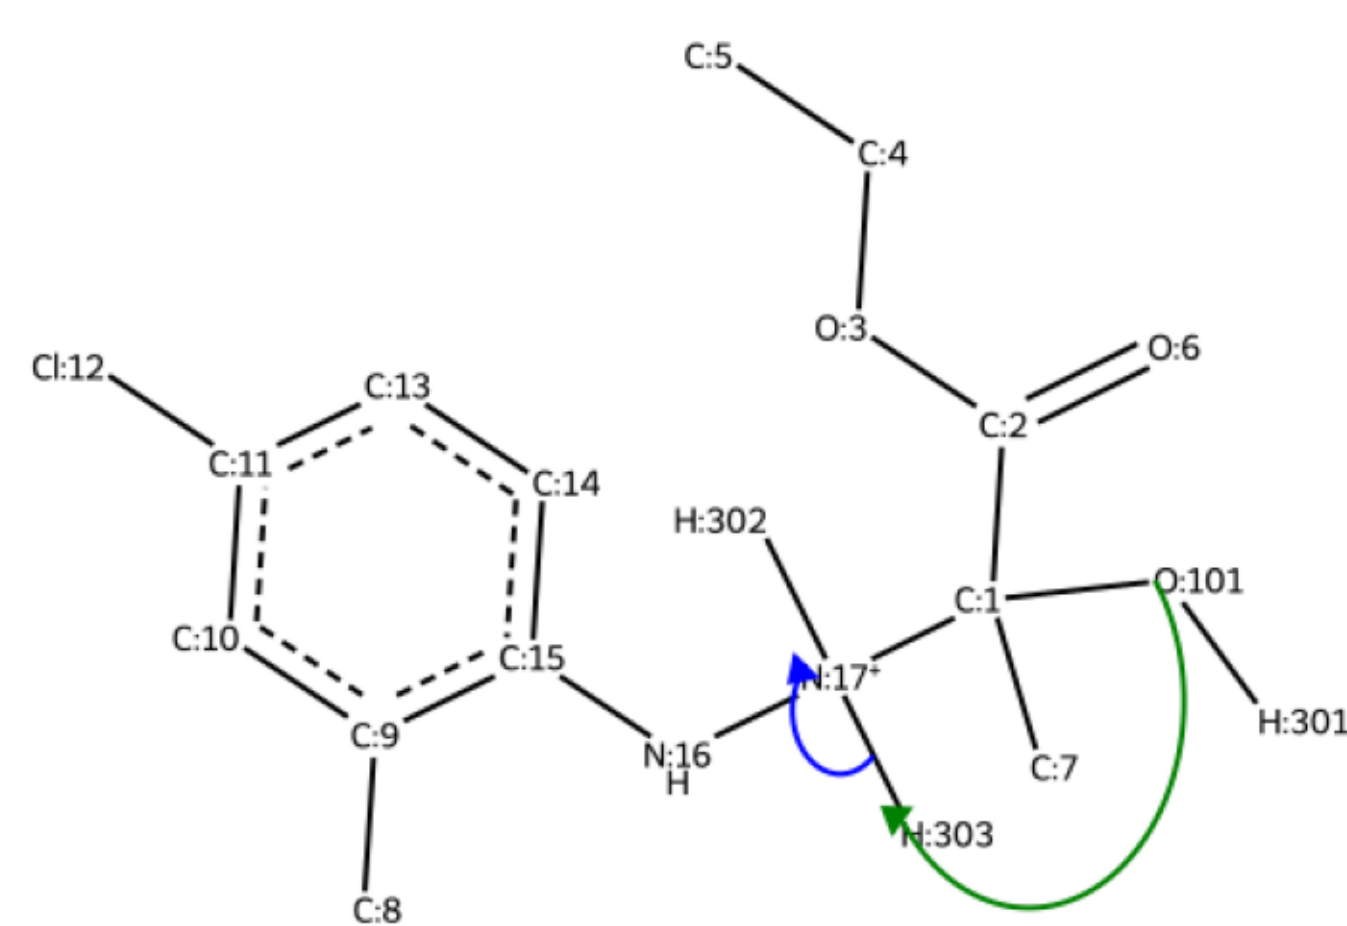

step #3

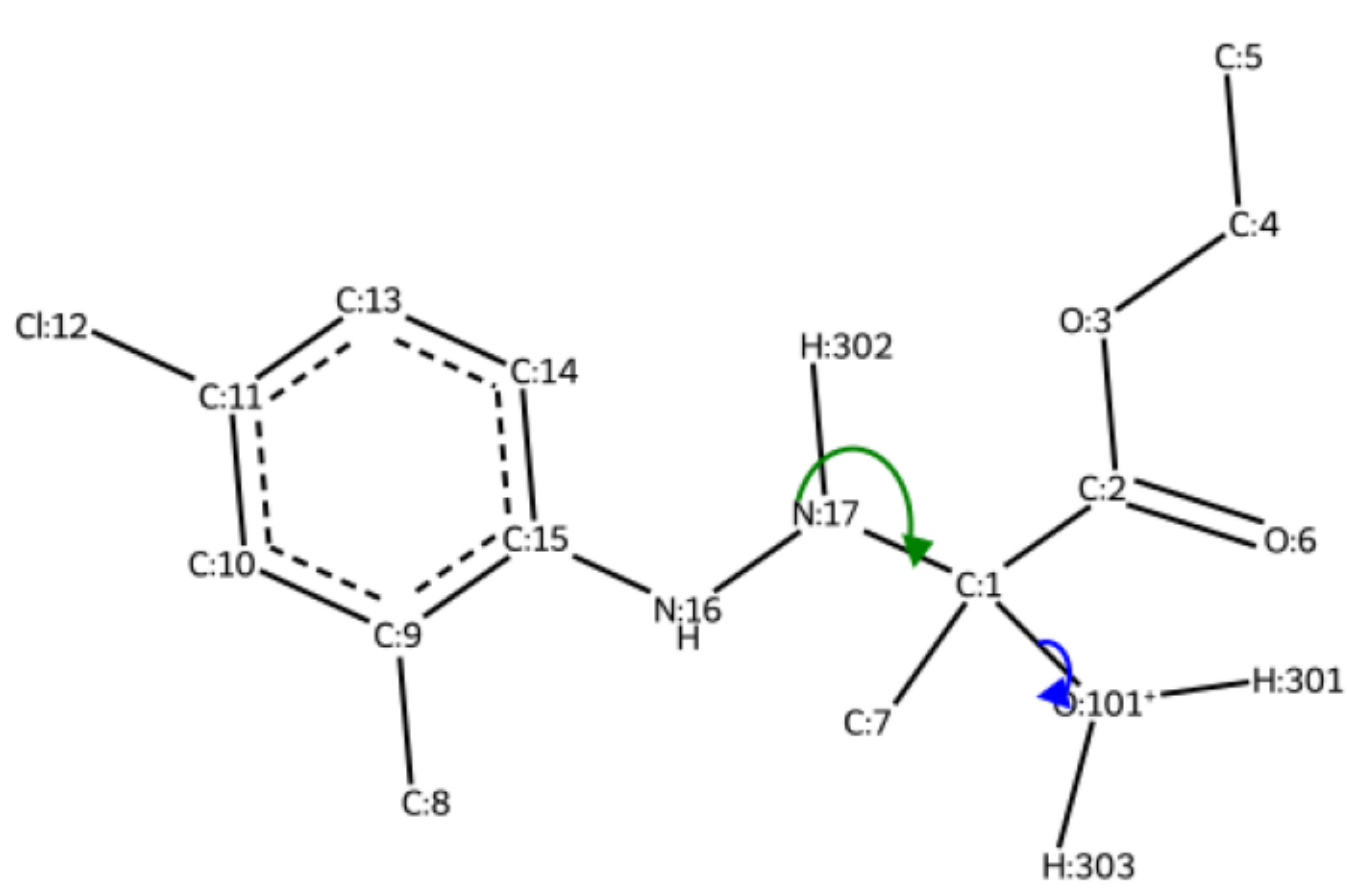

step #4

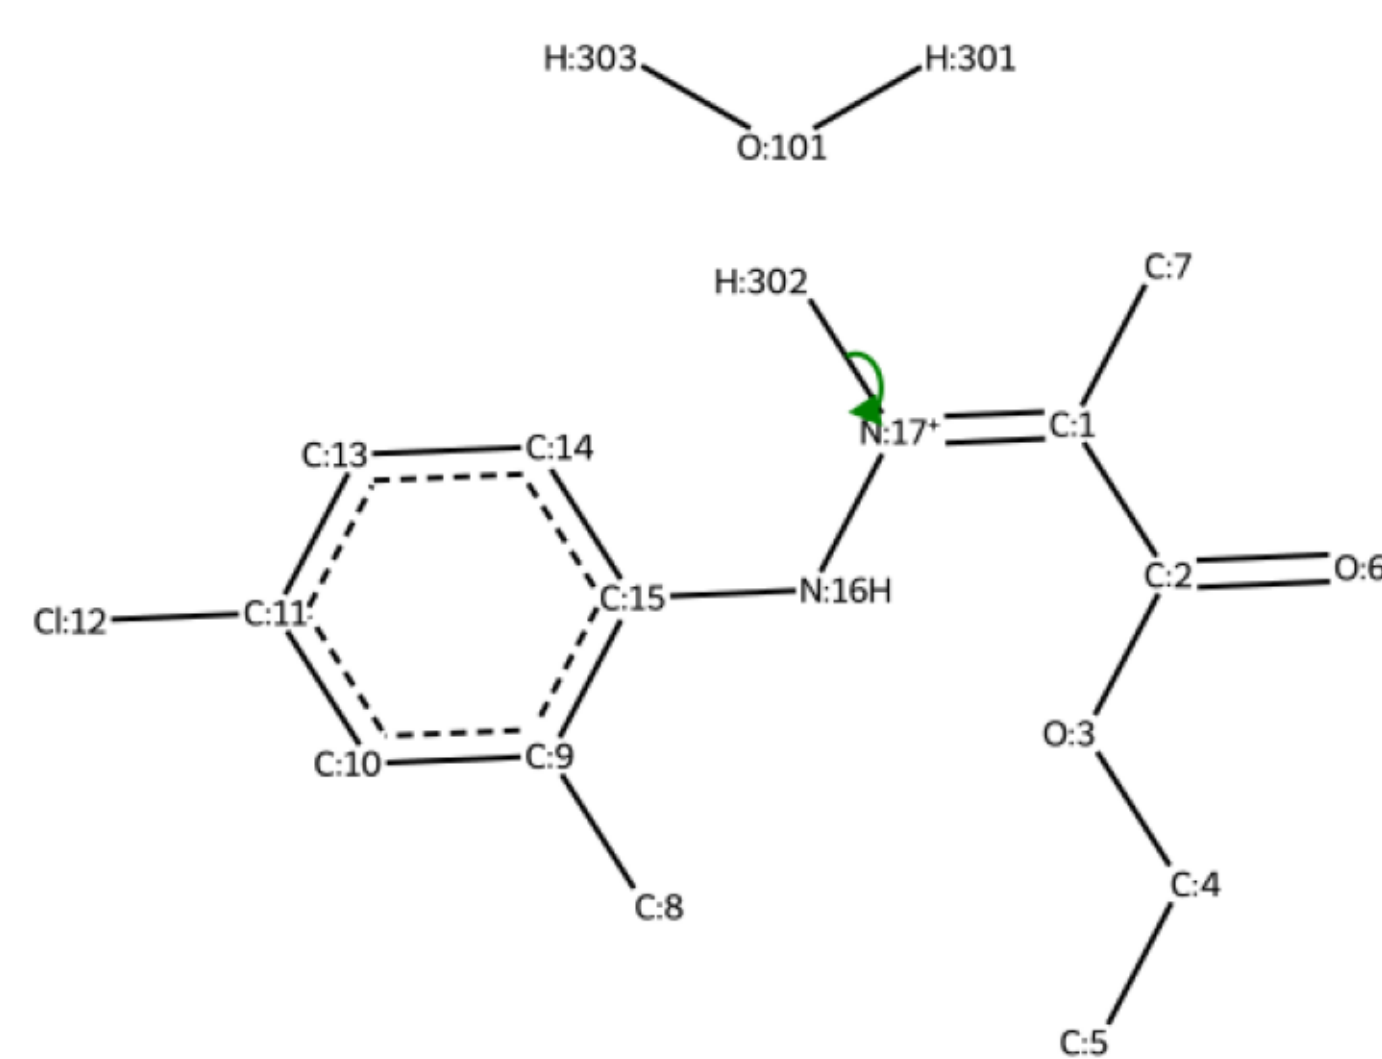

Product(s)

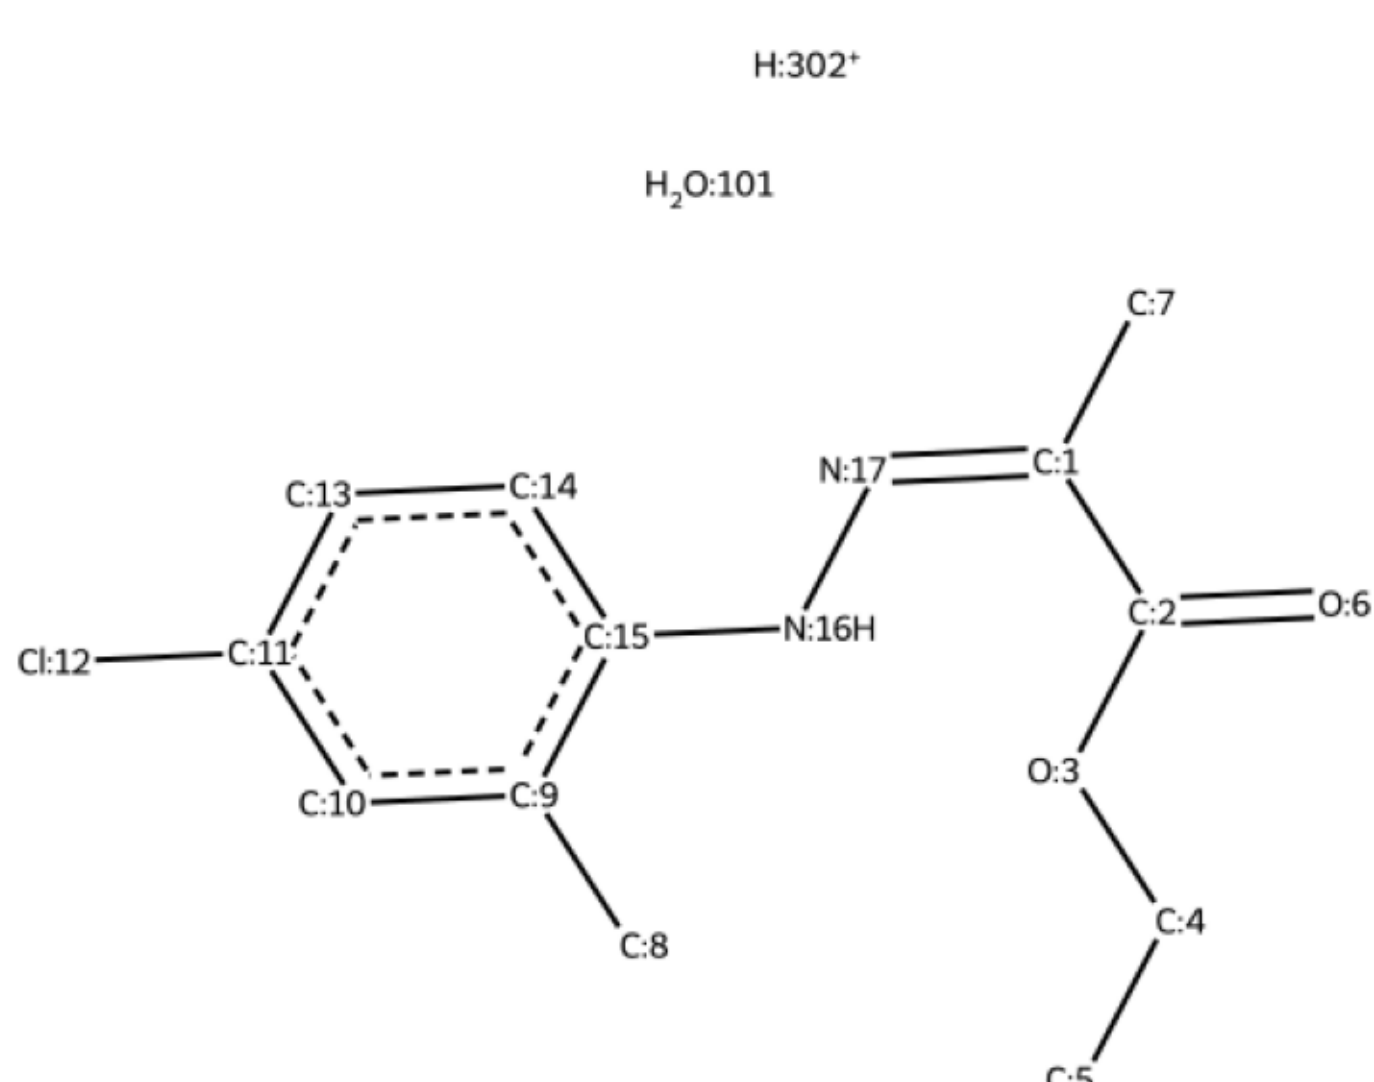



Original reaction  
sampled RXN\_ID:26)

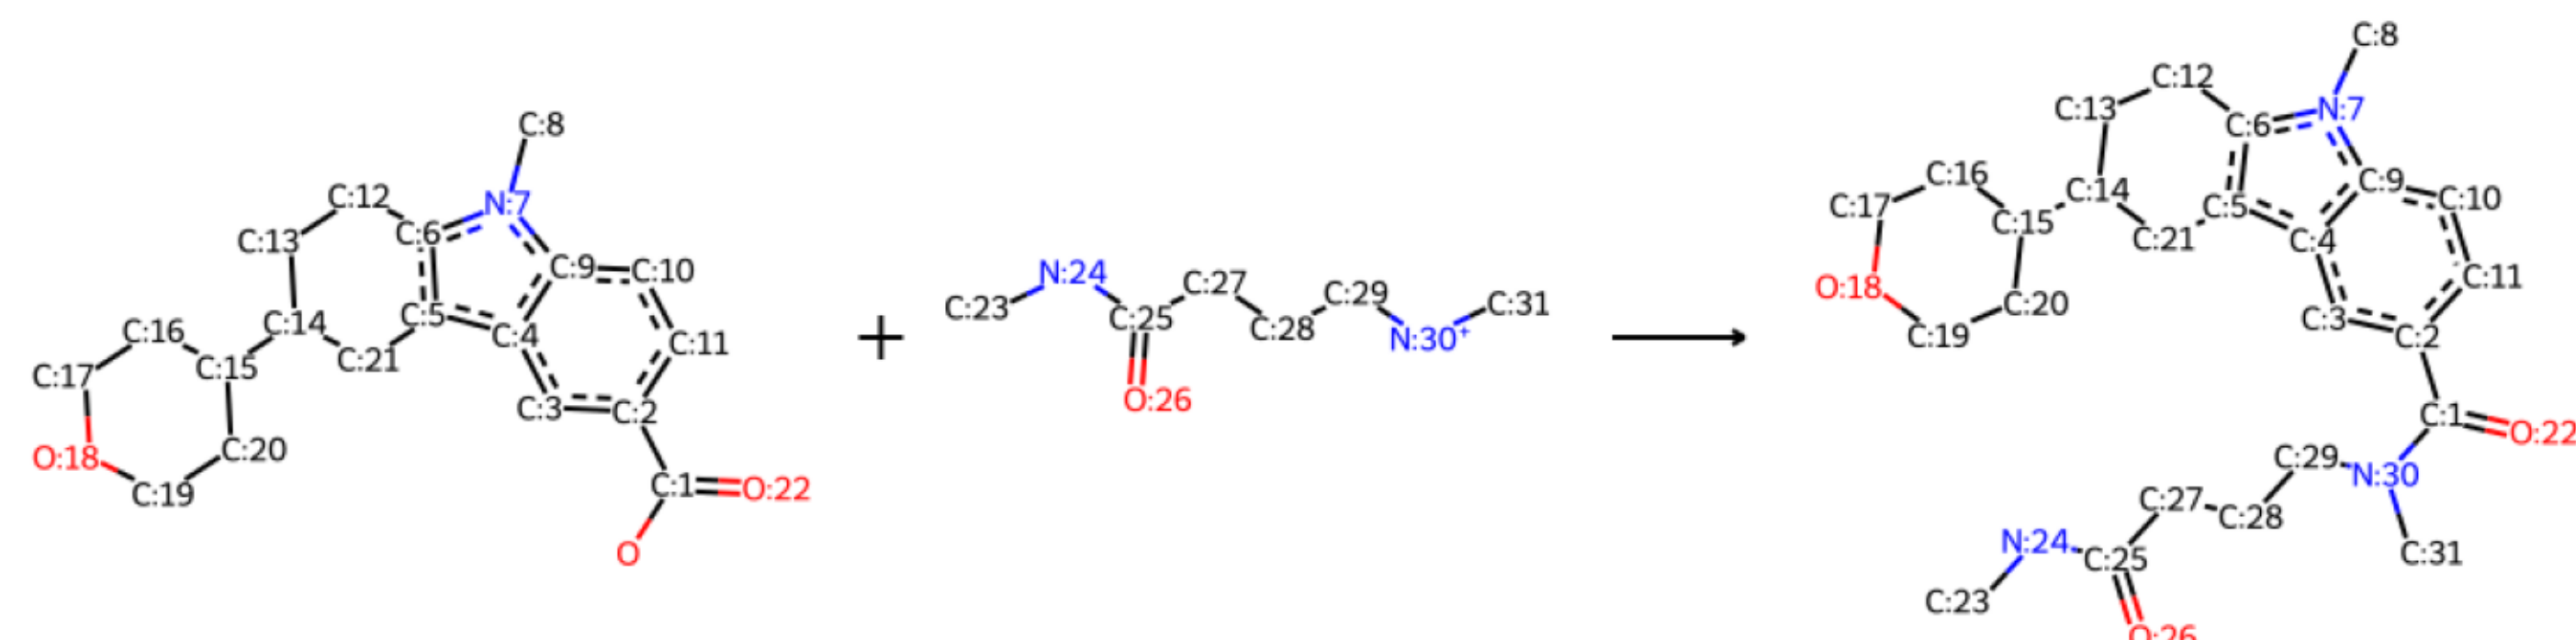

Identified mechanistic class -  
DCC\_condensation reaction

Reaction with missing reagents recovered

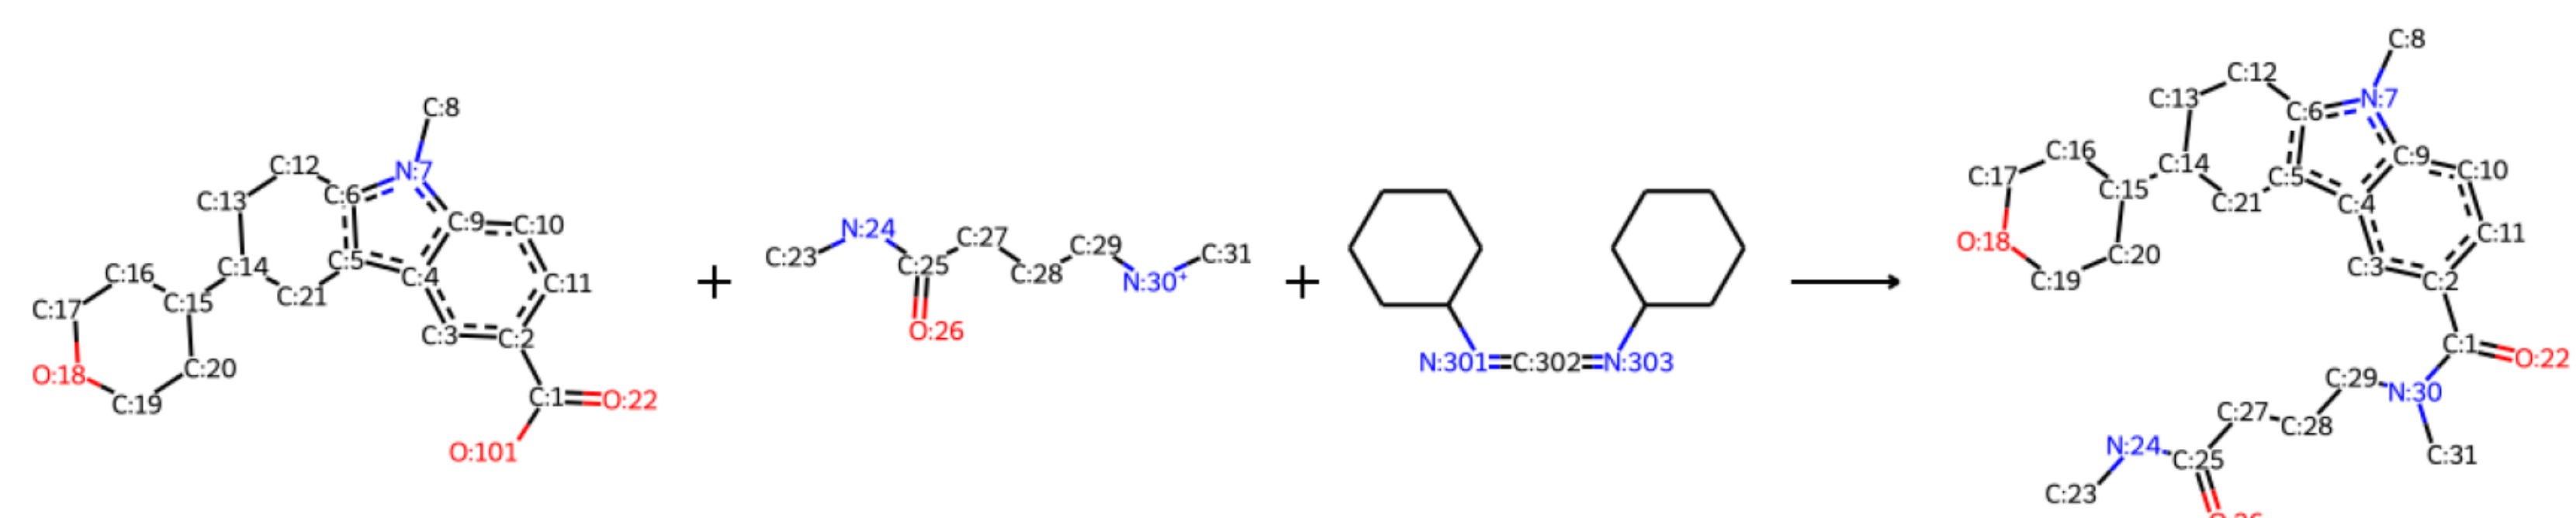

Proposed mechanistic pathway

[Arrow order: (1) green, (2) blue, (3) red, (4) orange]

step #1

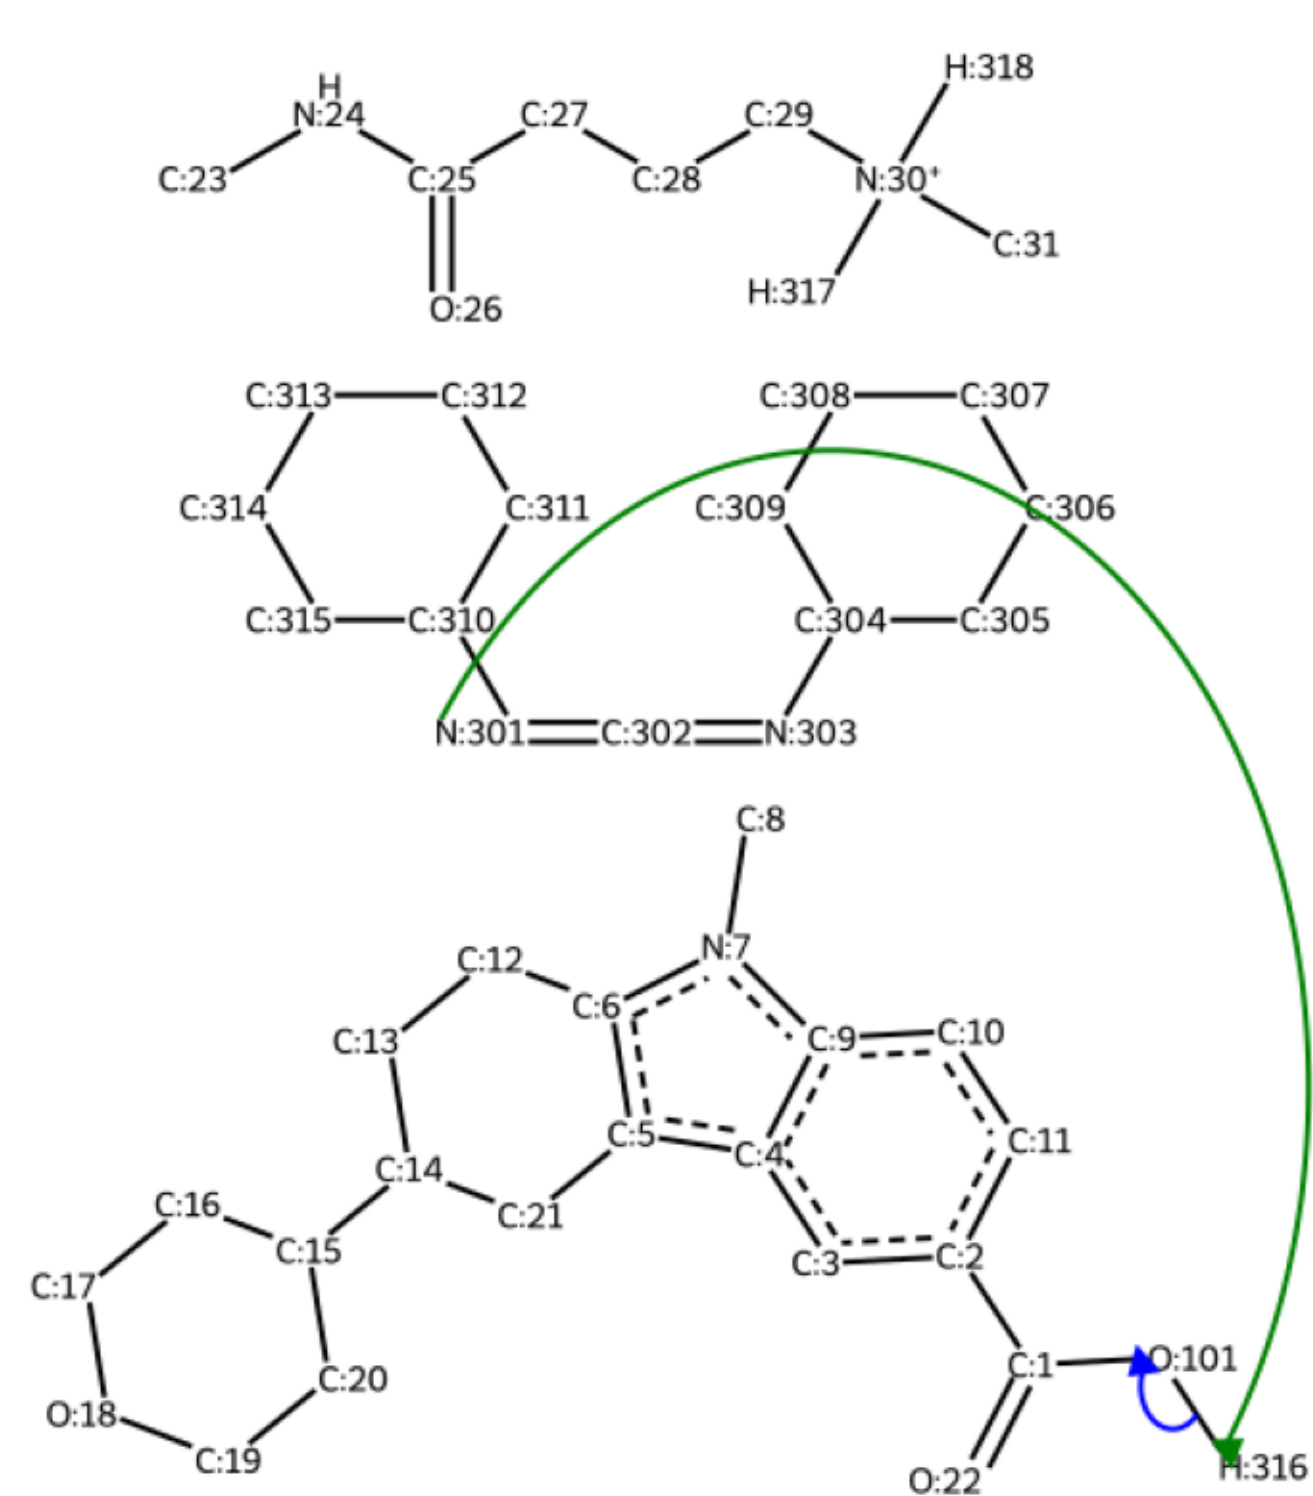

step #2

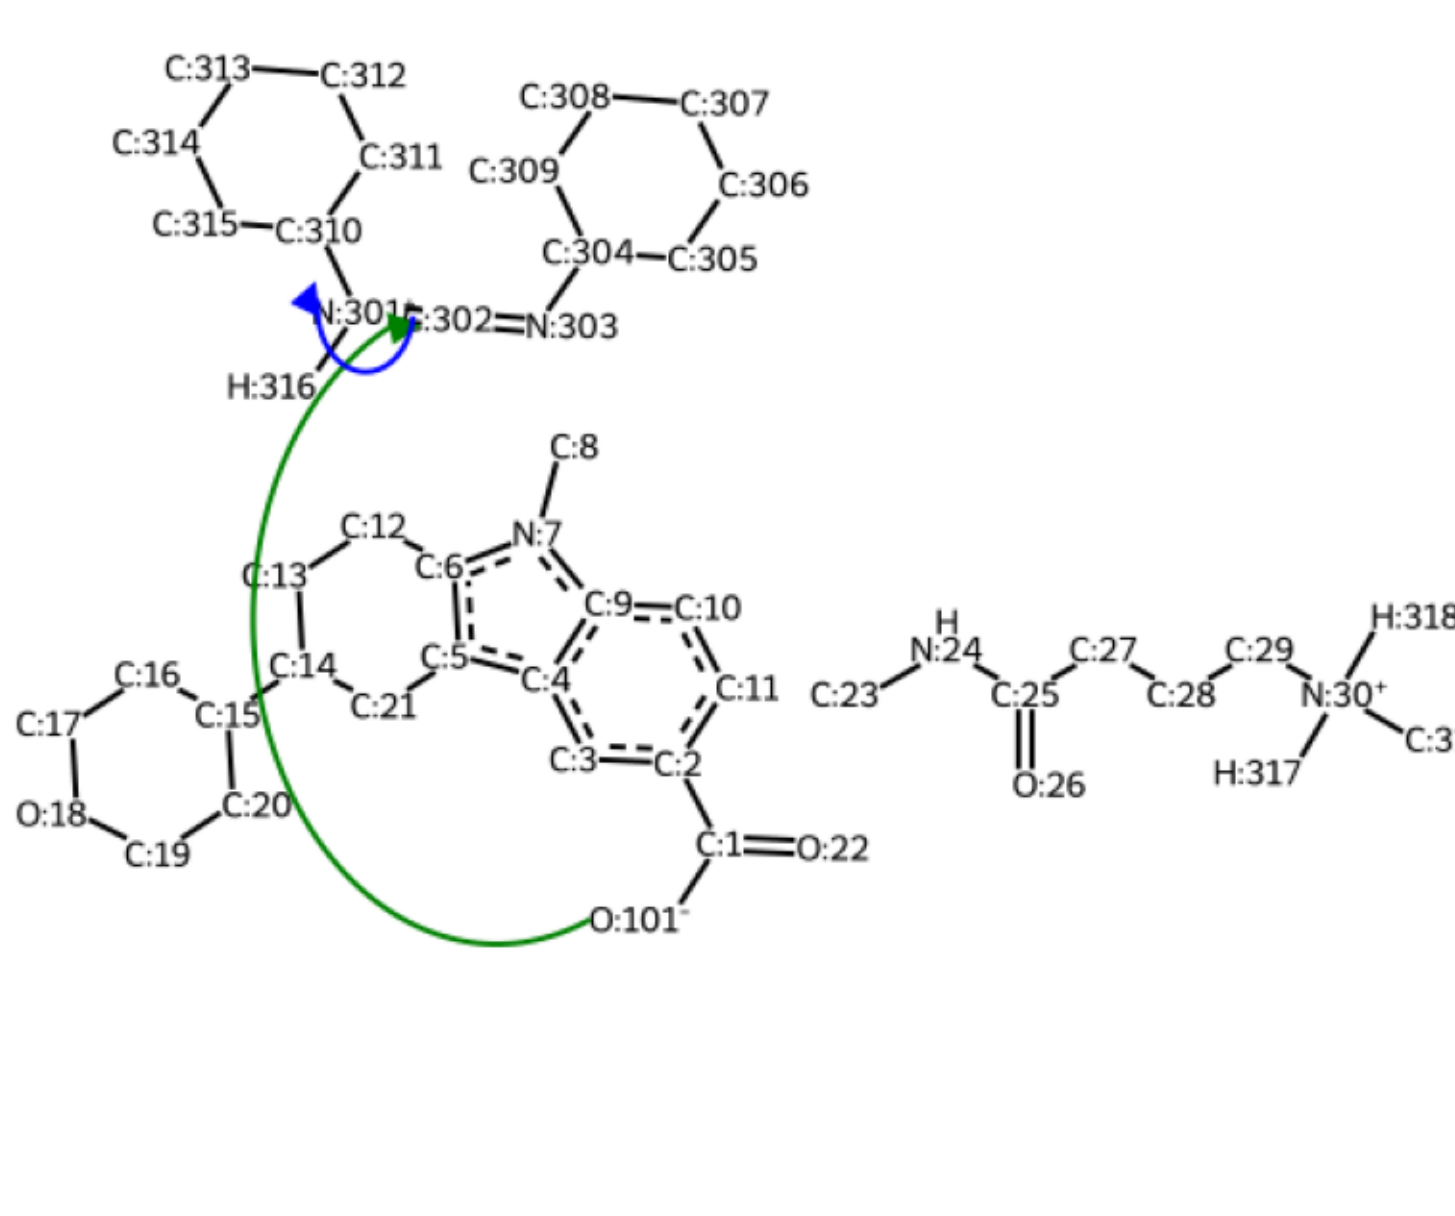

step #3

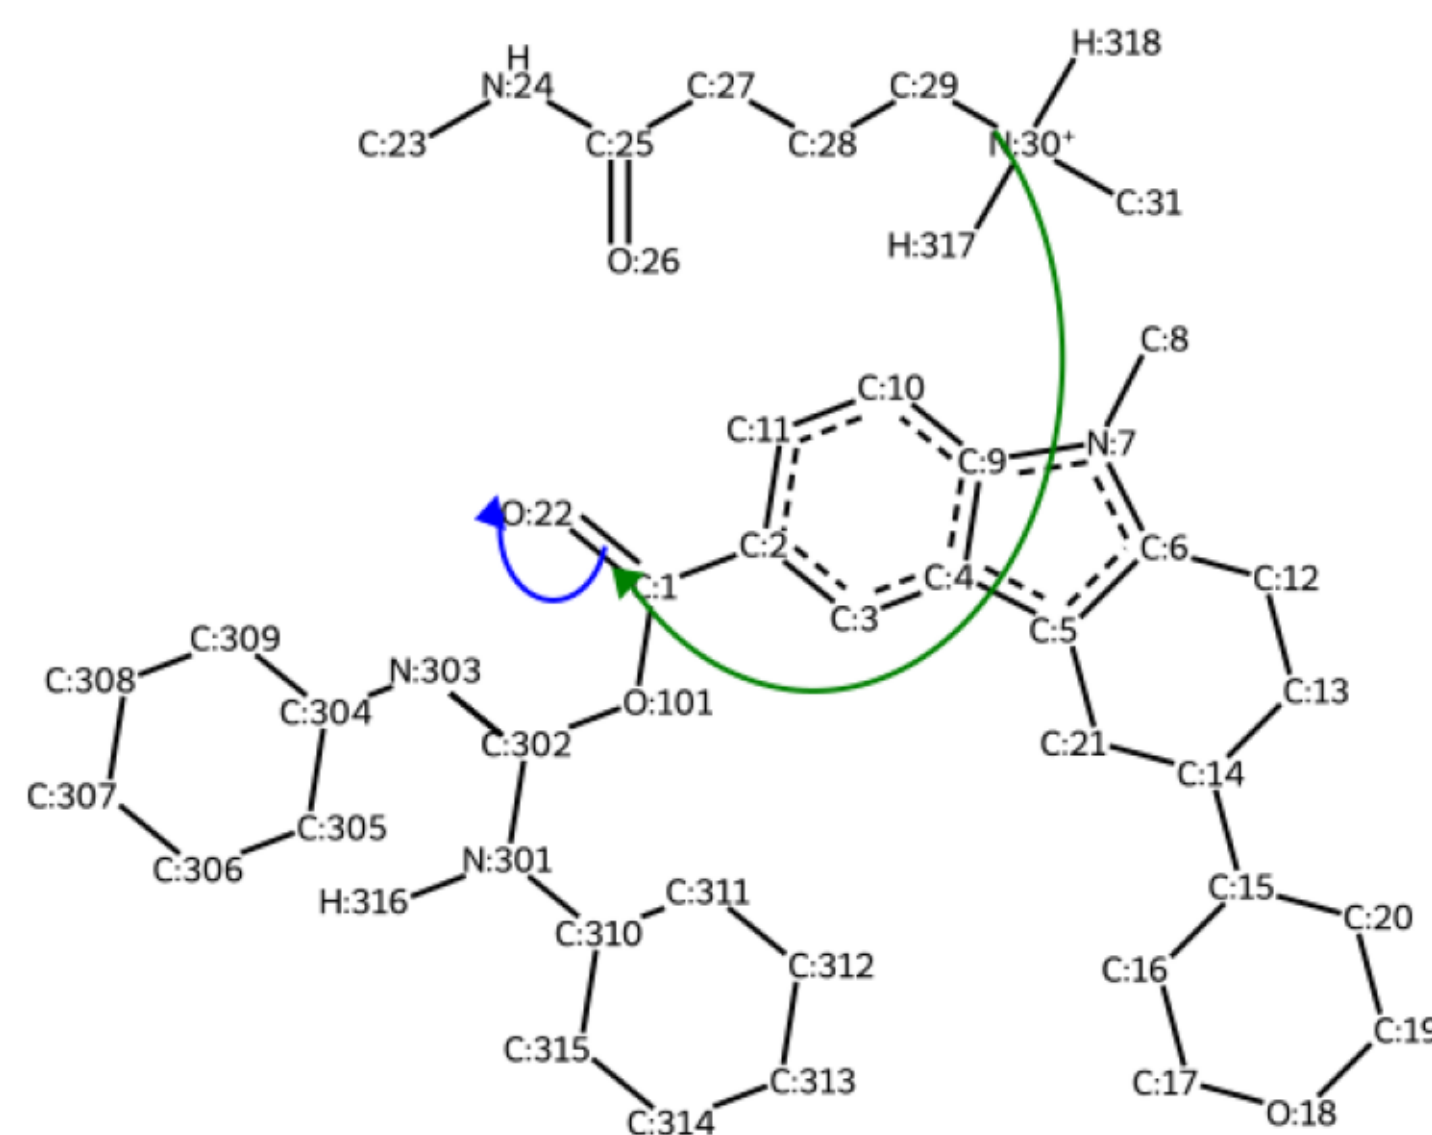

step #4

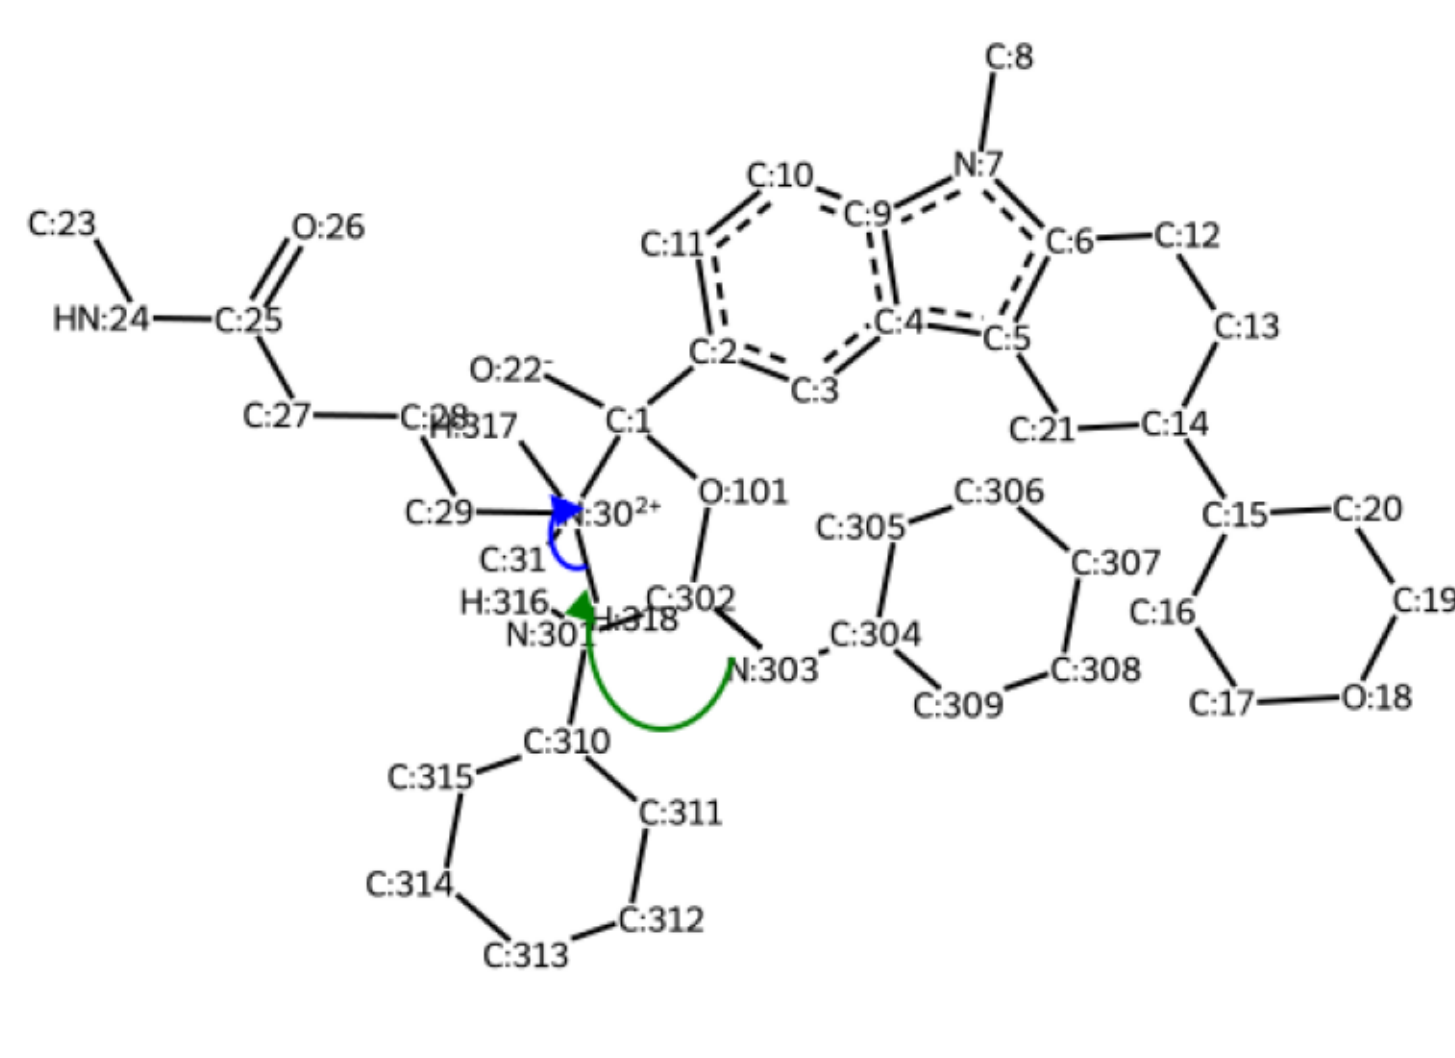

step #5

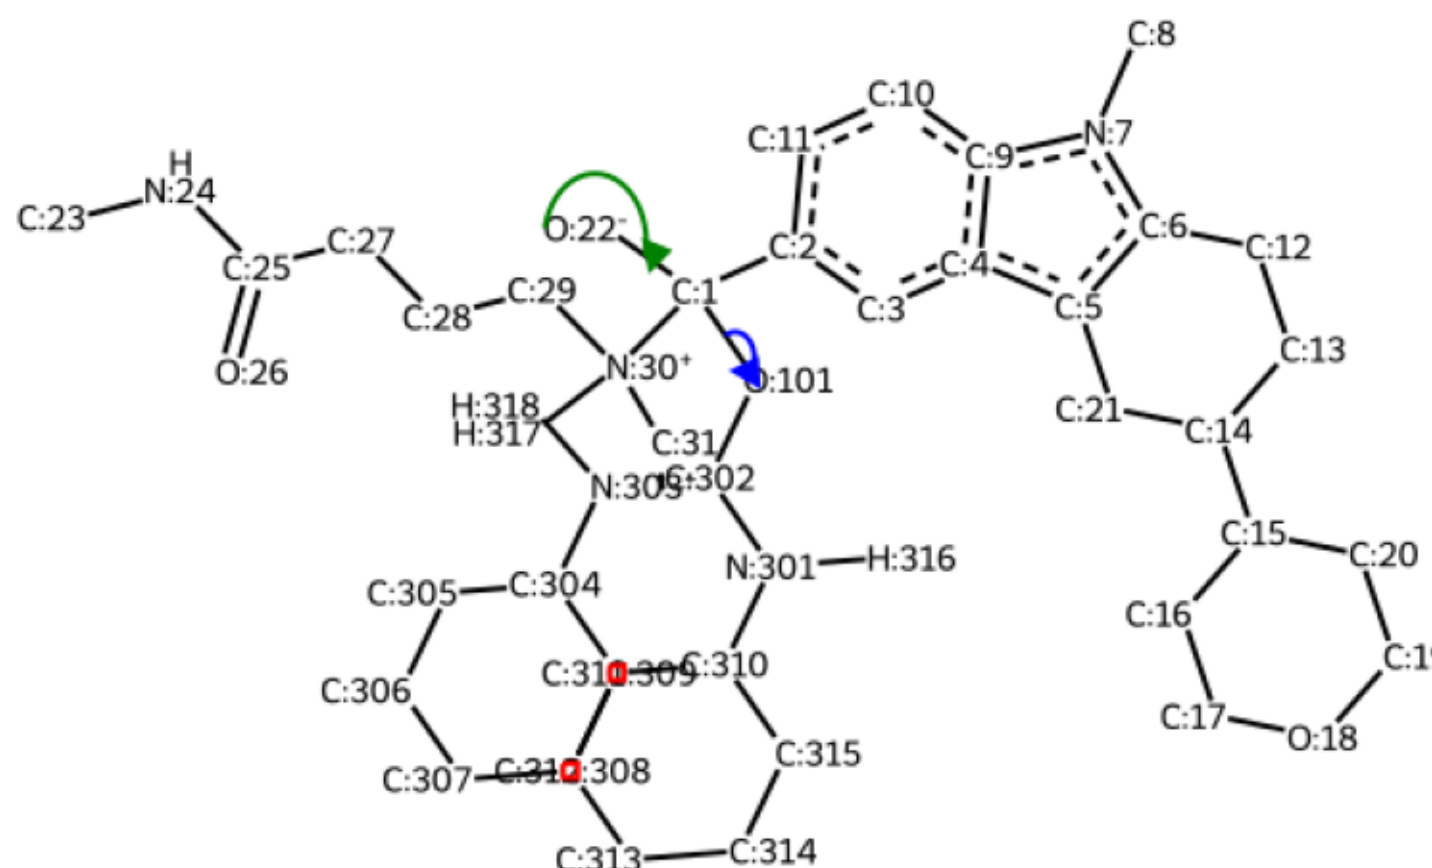

step #6

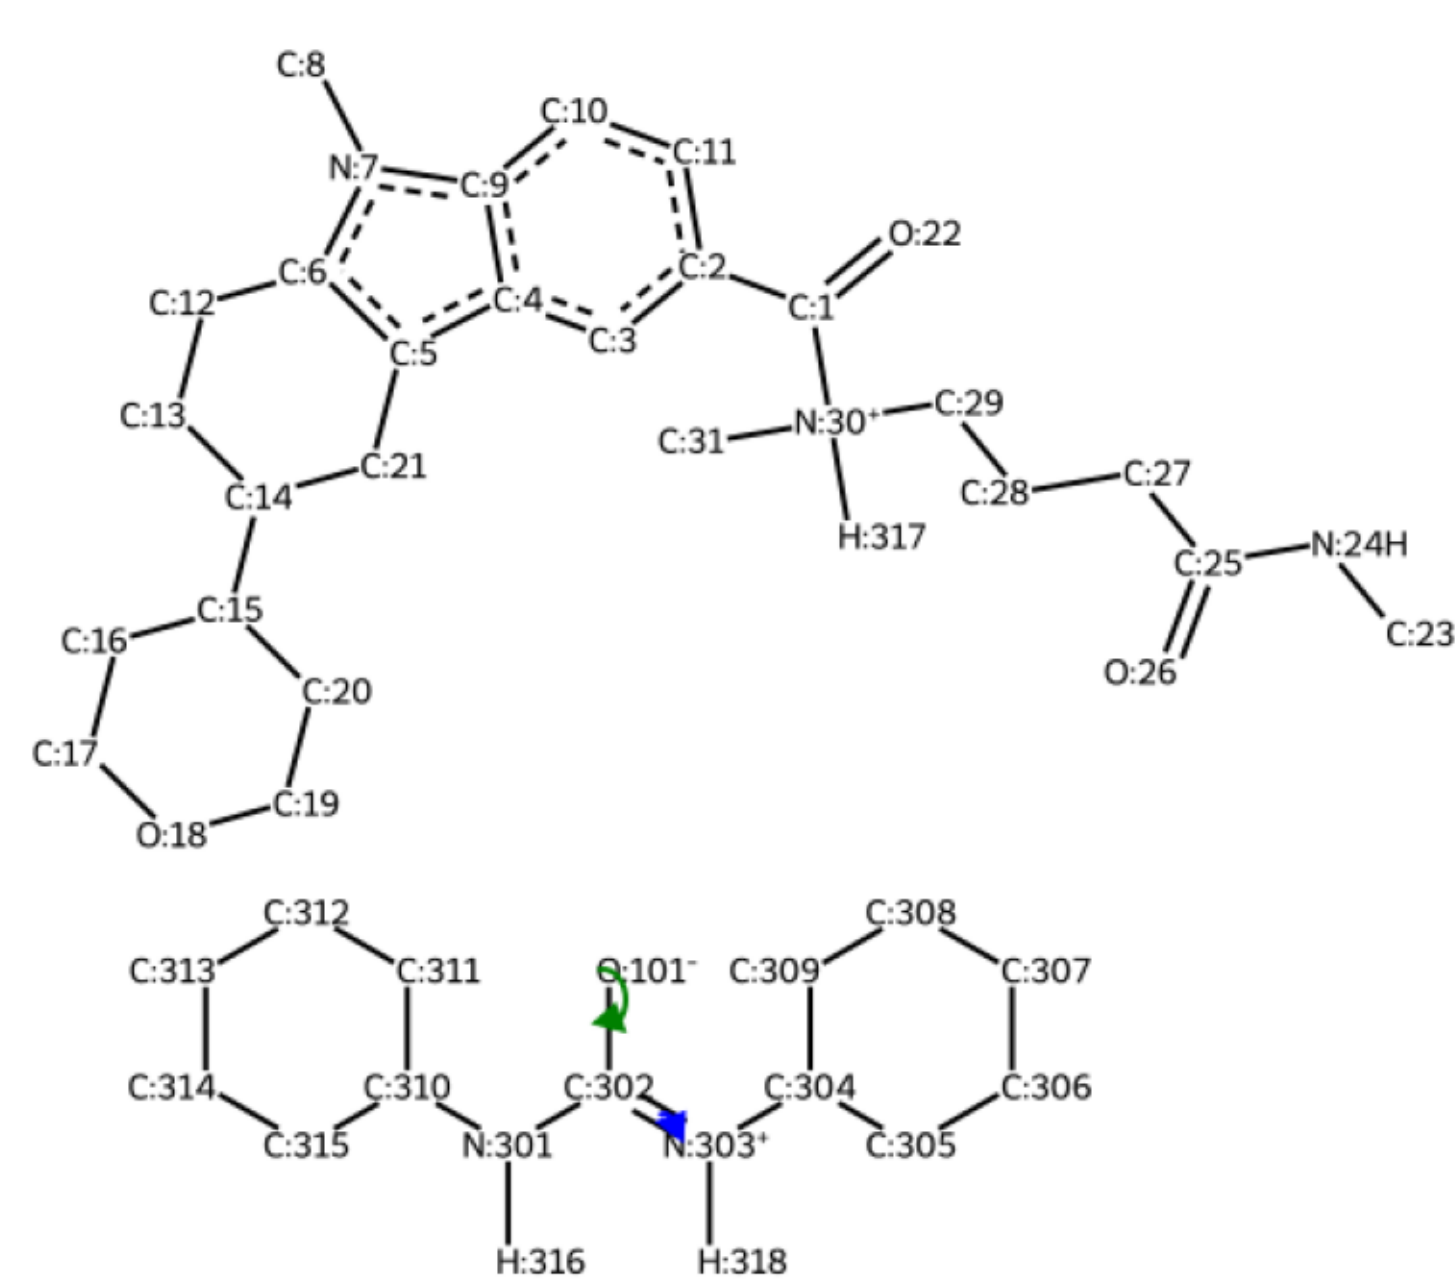

Product(s)

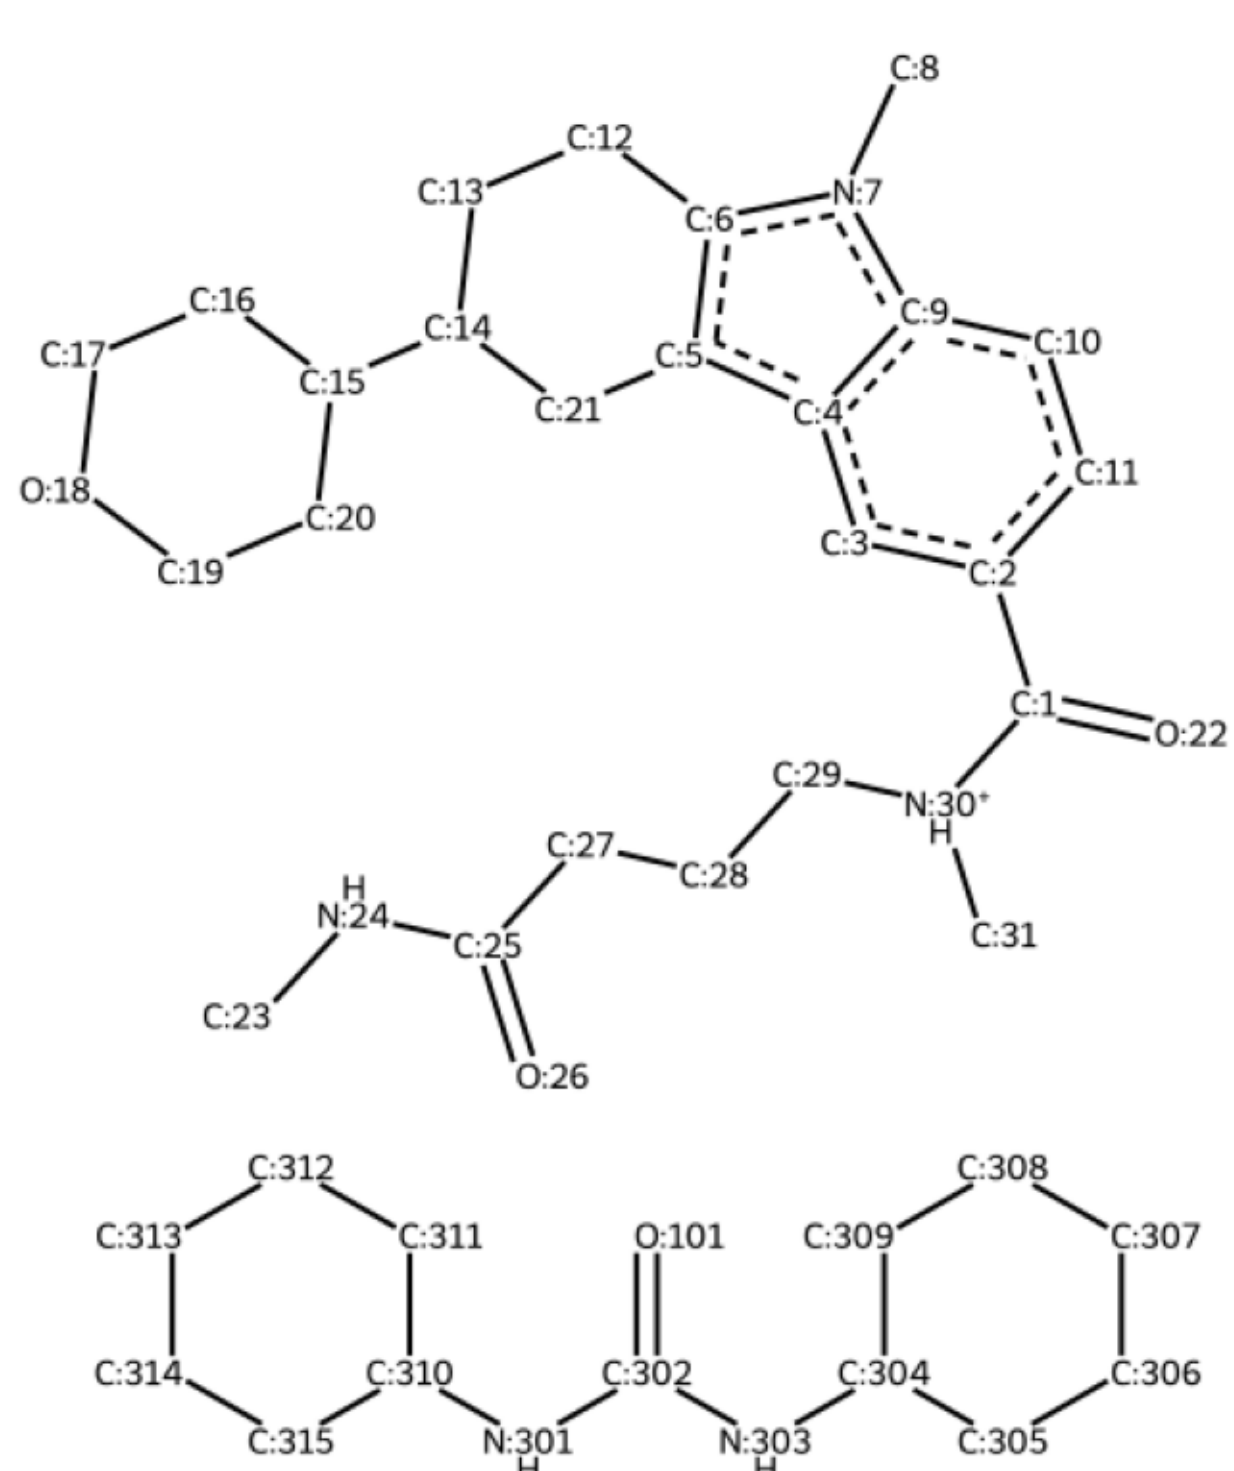

proton transfer

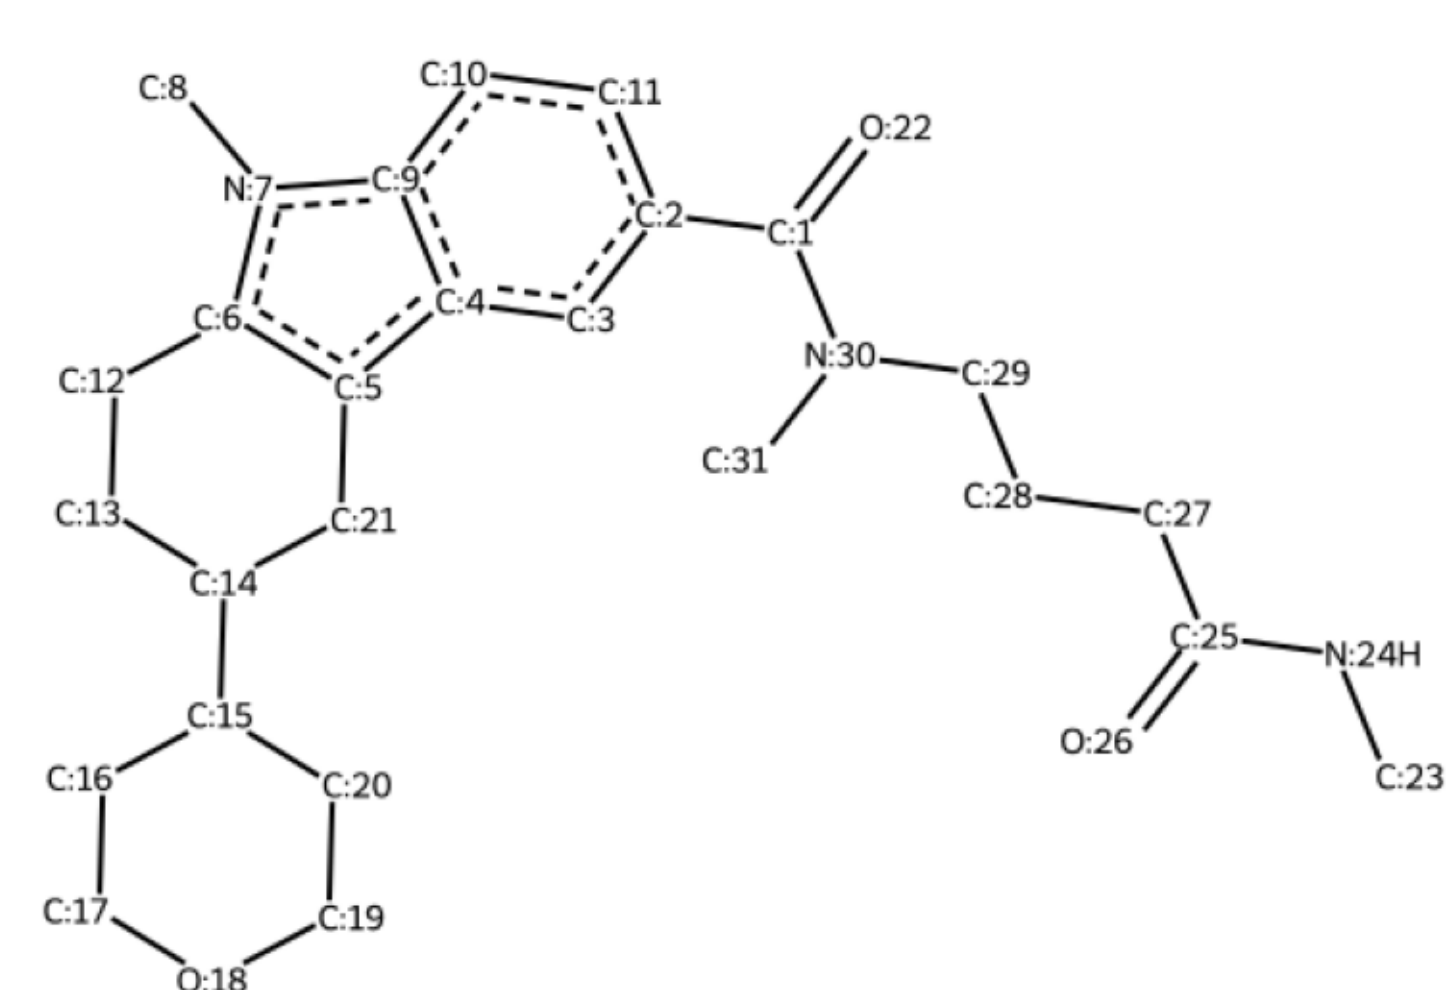



Original reaction  
sampled RXN\_ID:27)

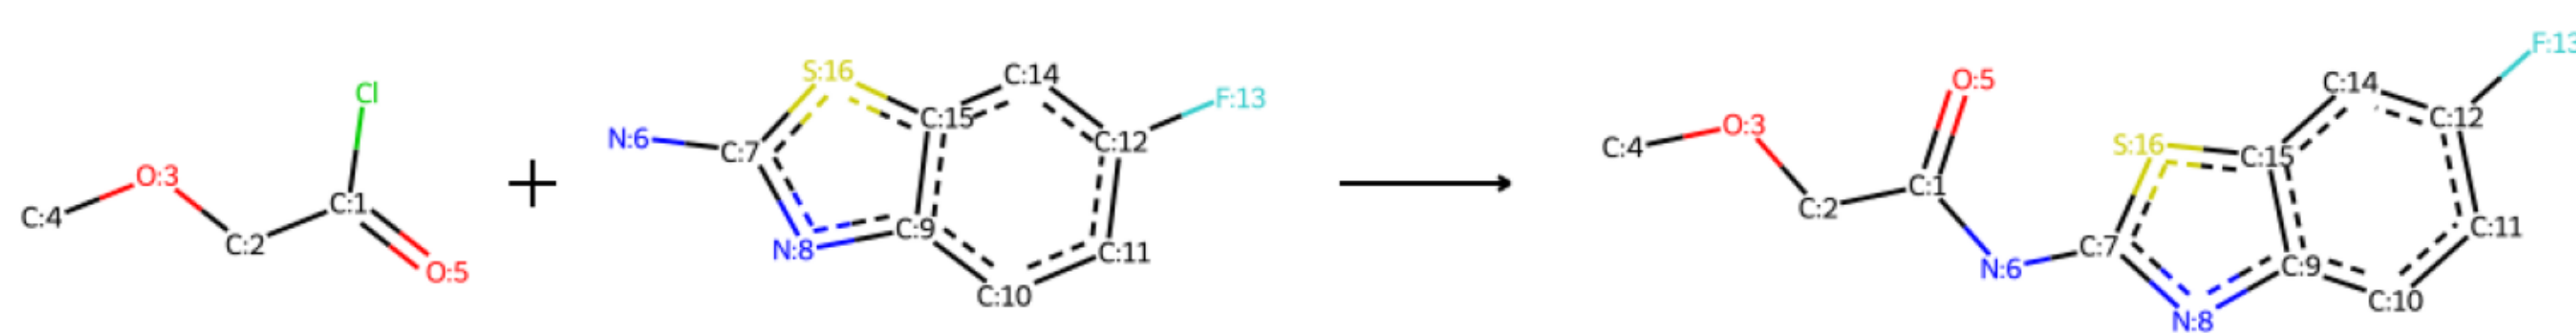

Identified mechanistic class -  
nucleophilic\_attack\_to\_(thio)carbonyl\_or\_sulfonyl reaction

Reaction with missing reagents recovered

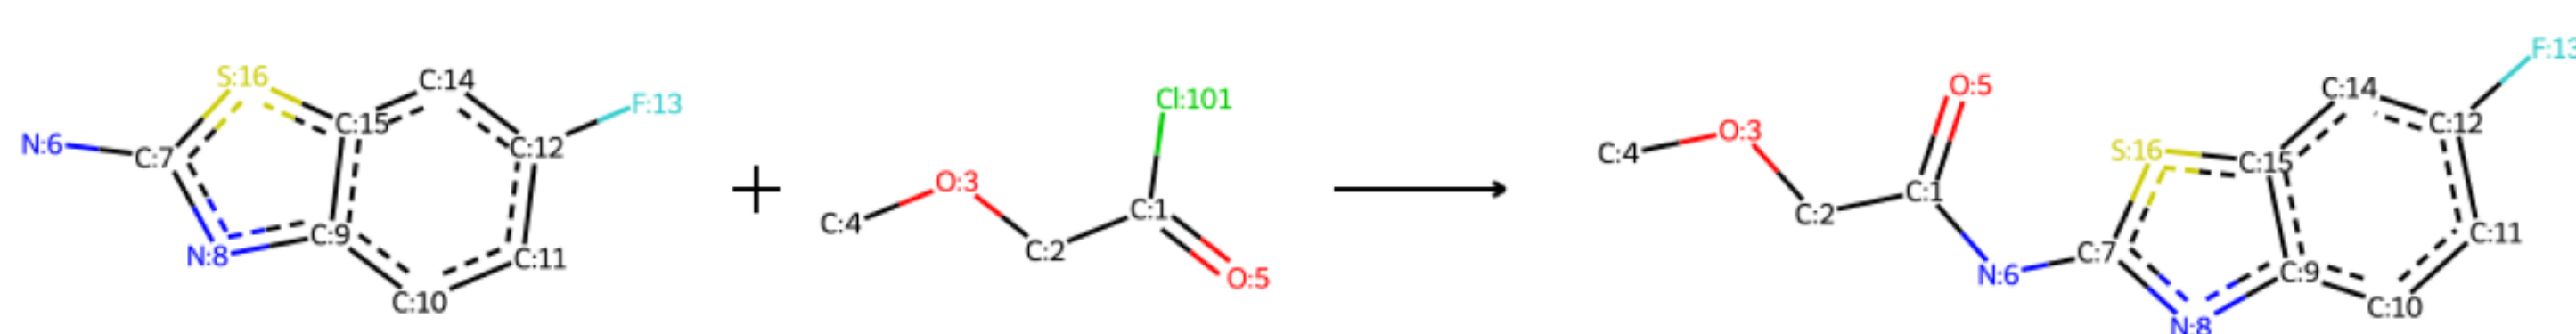

Proposed mechanistic pathway

[Arrow order: (1) green, (2) blue, (3) red, (4) orange]

step #1

step #2

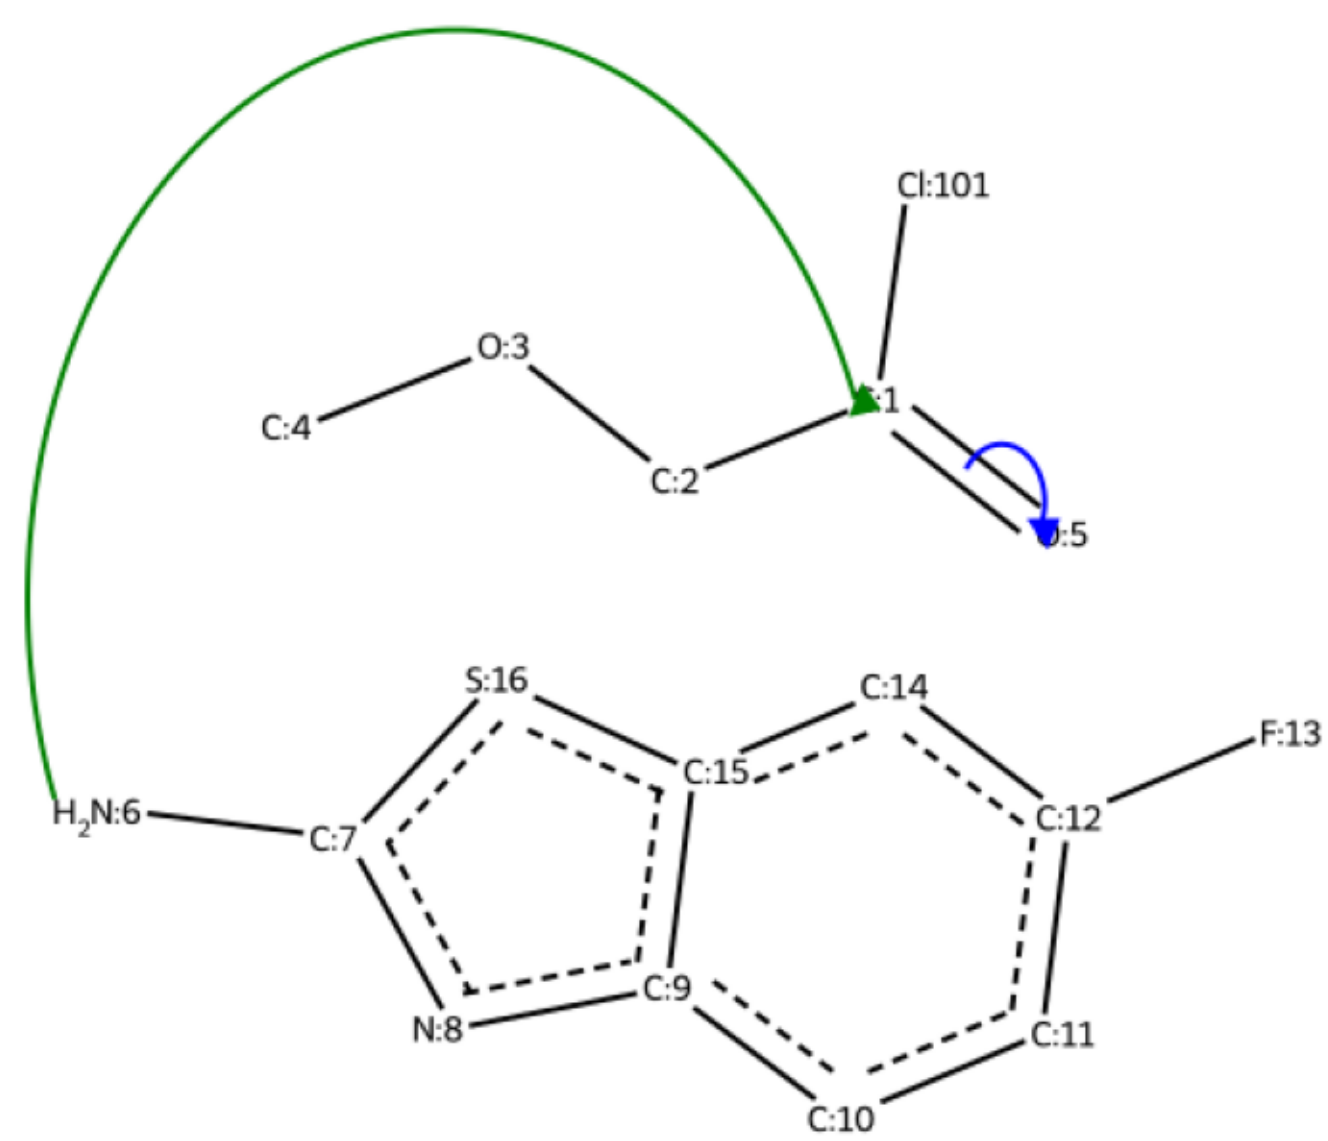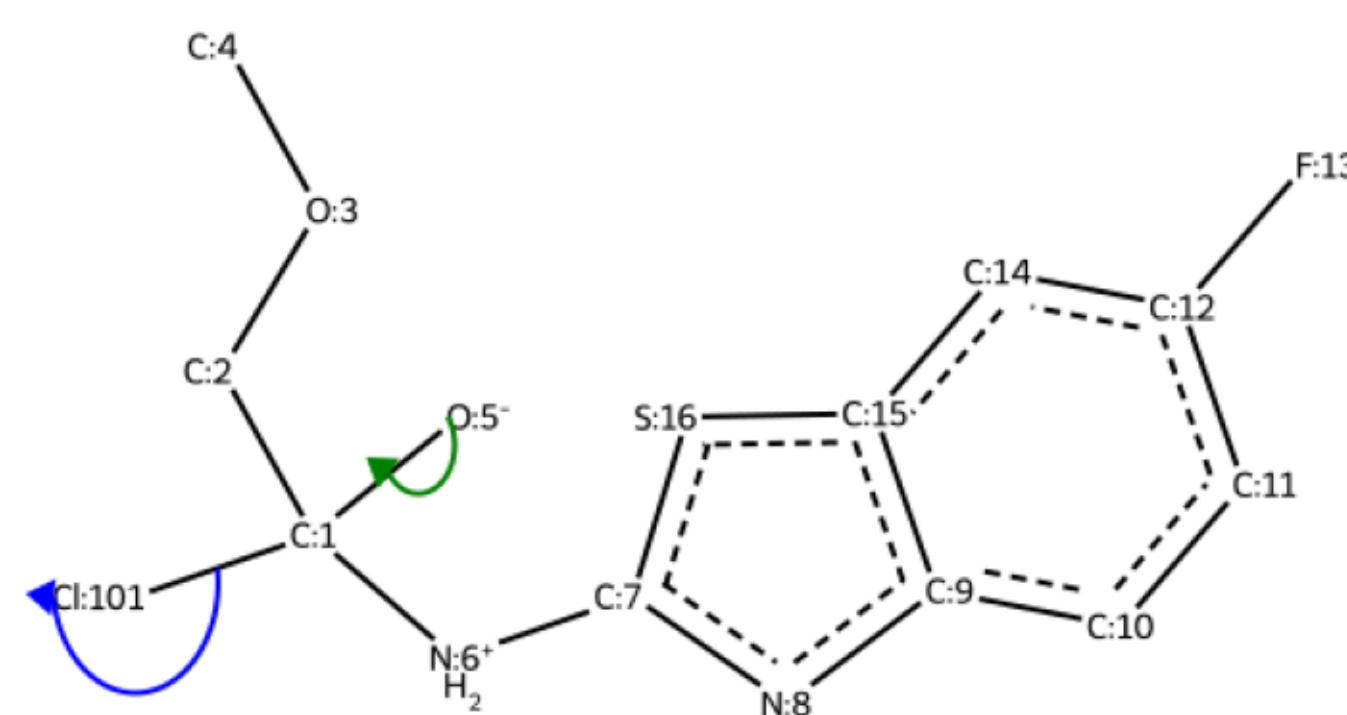

Product(s)

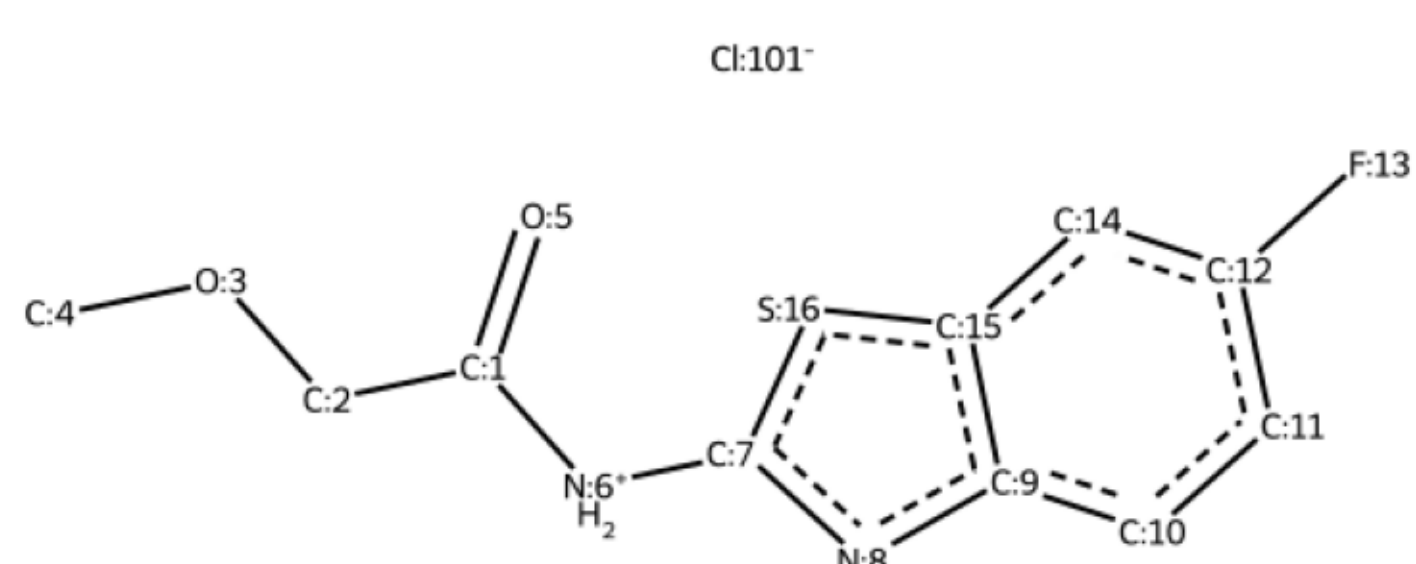

proton transfer

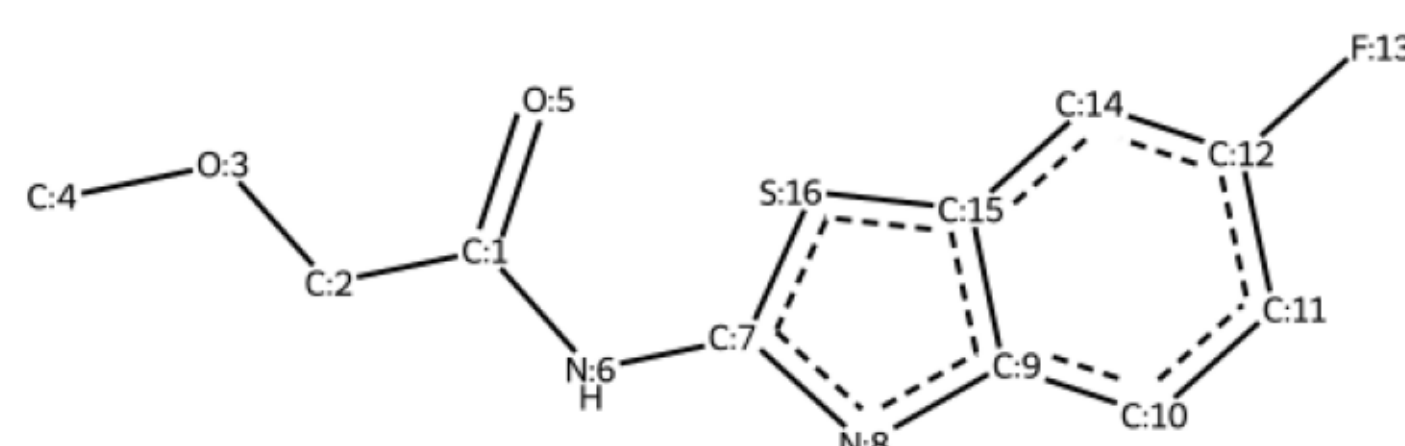

Original reaction  
sampled RXN\_ID:28)

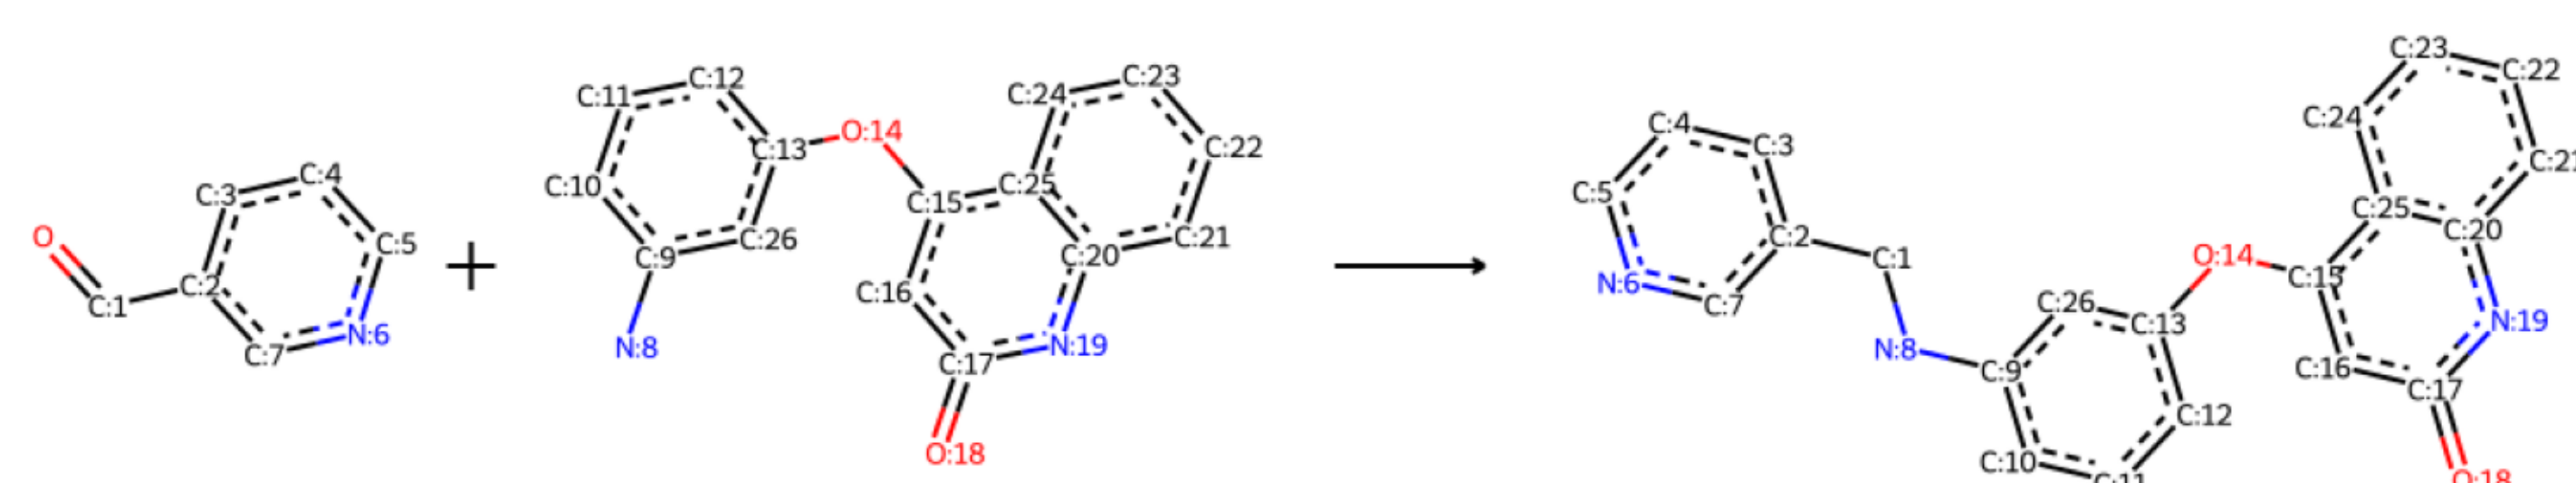

Identified mechanistic class -  
reductive\_amination reaction

Reaction with missing reagents recovered

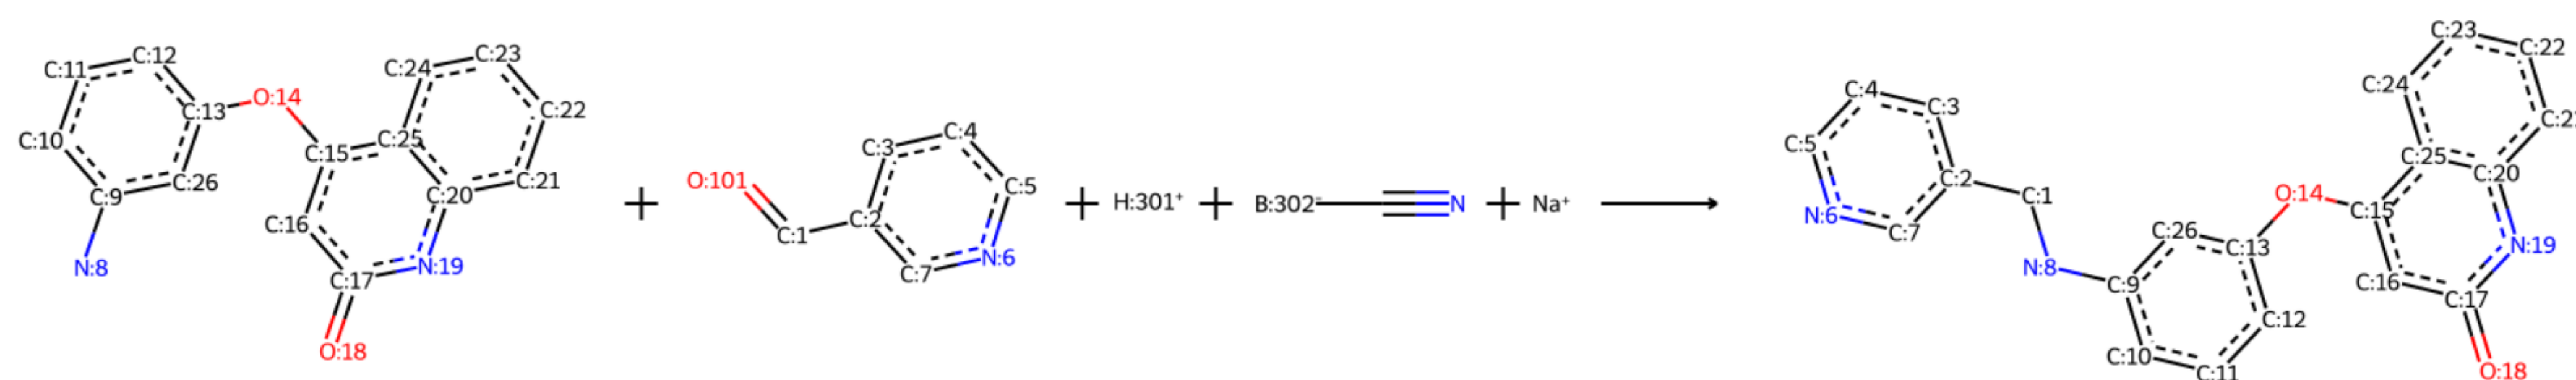

Proposed mechanistic pathway

[Arrow order: (1) green, (2) blue, (3) red, (4) orange]

step #1

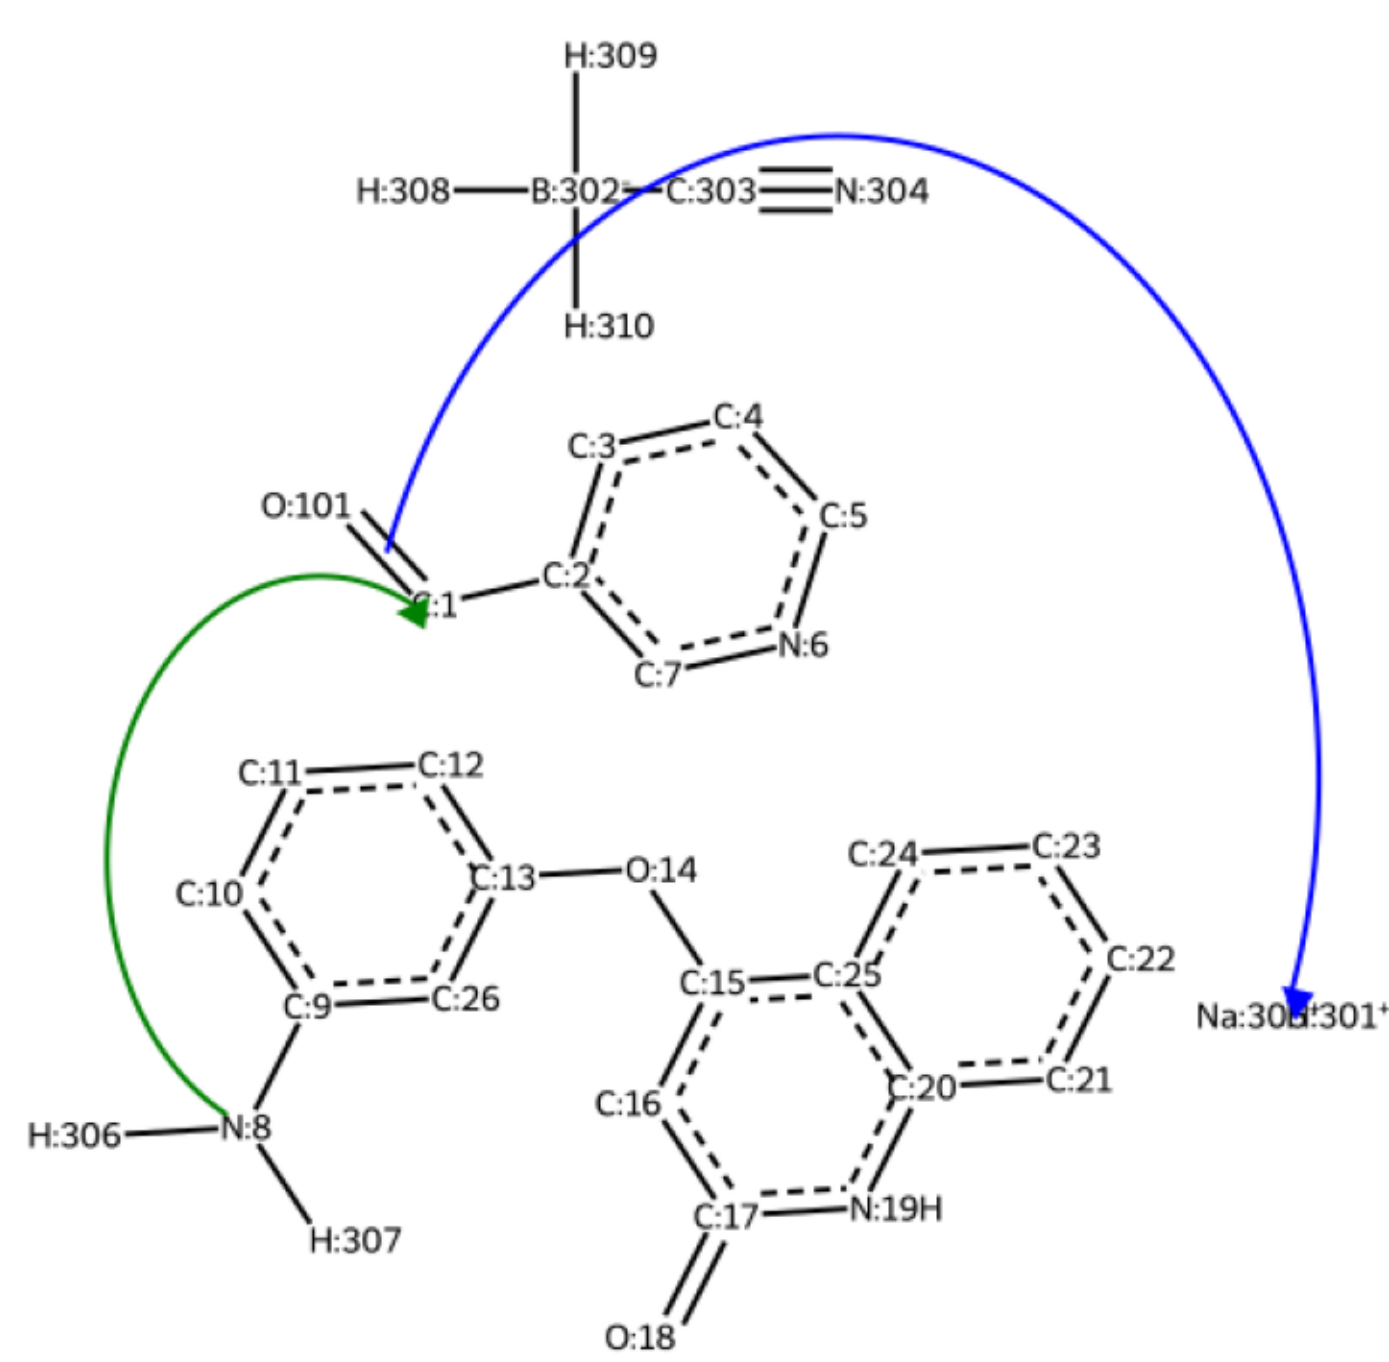

step #2

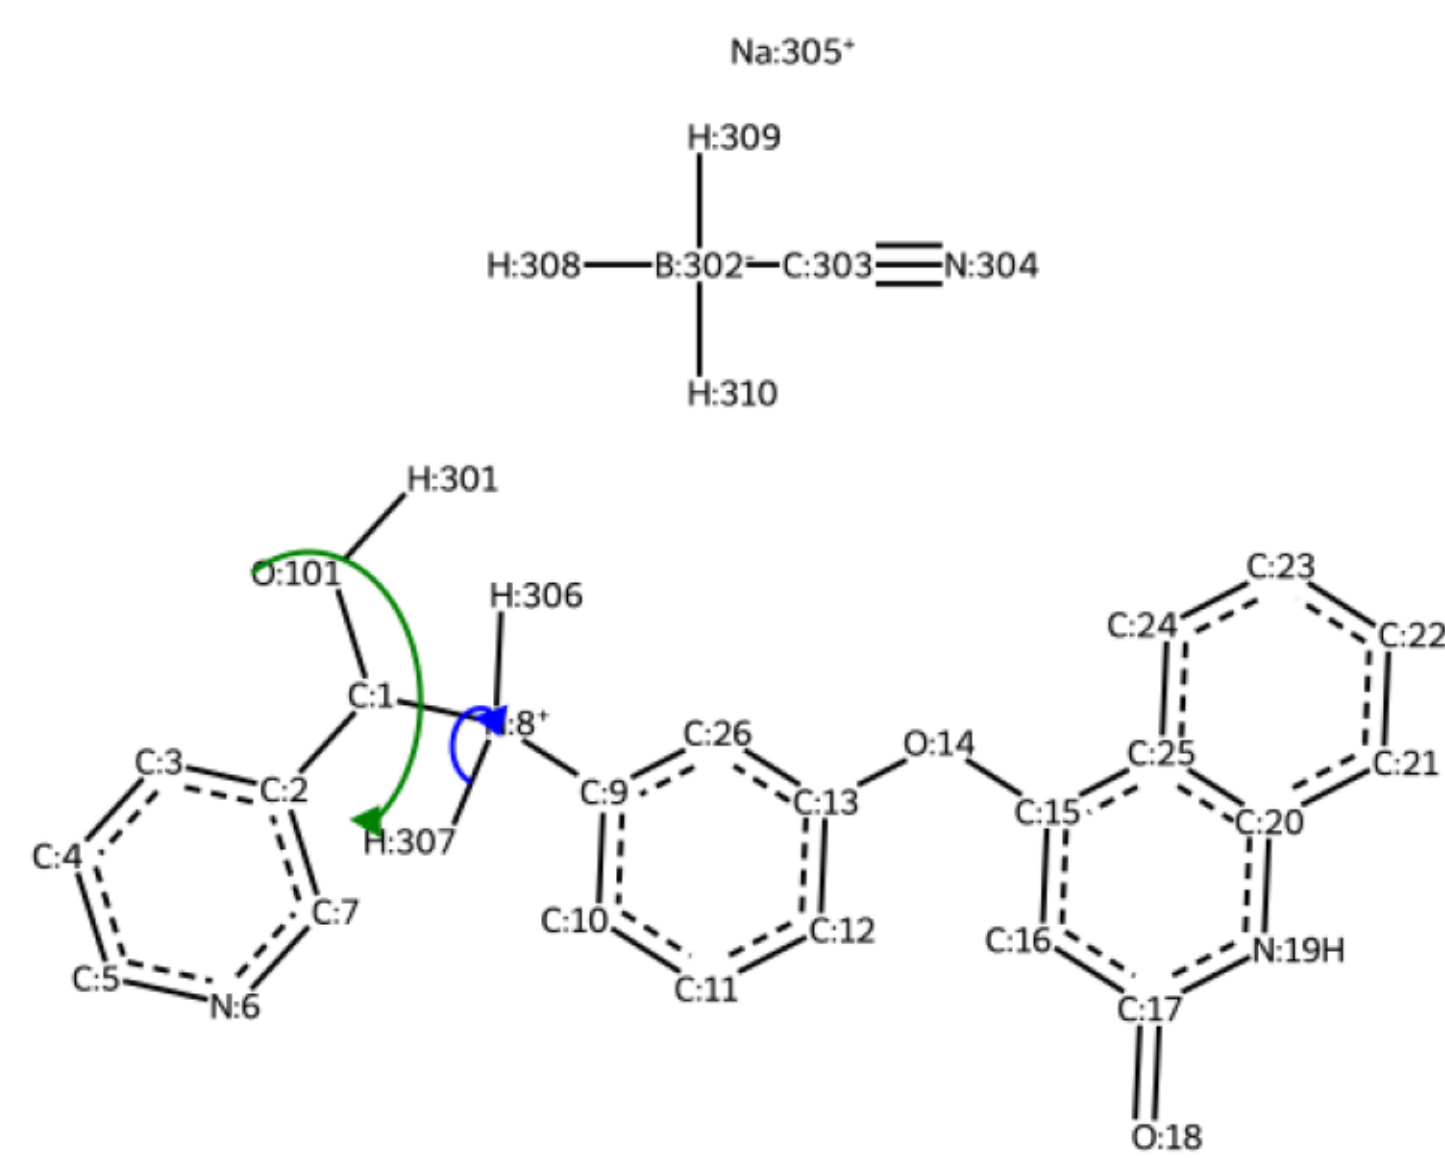

step #3

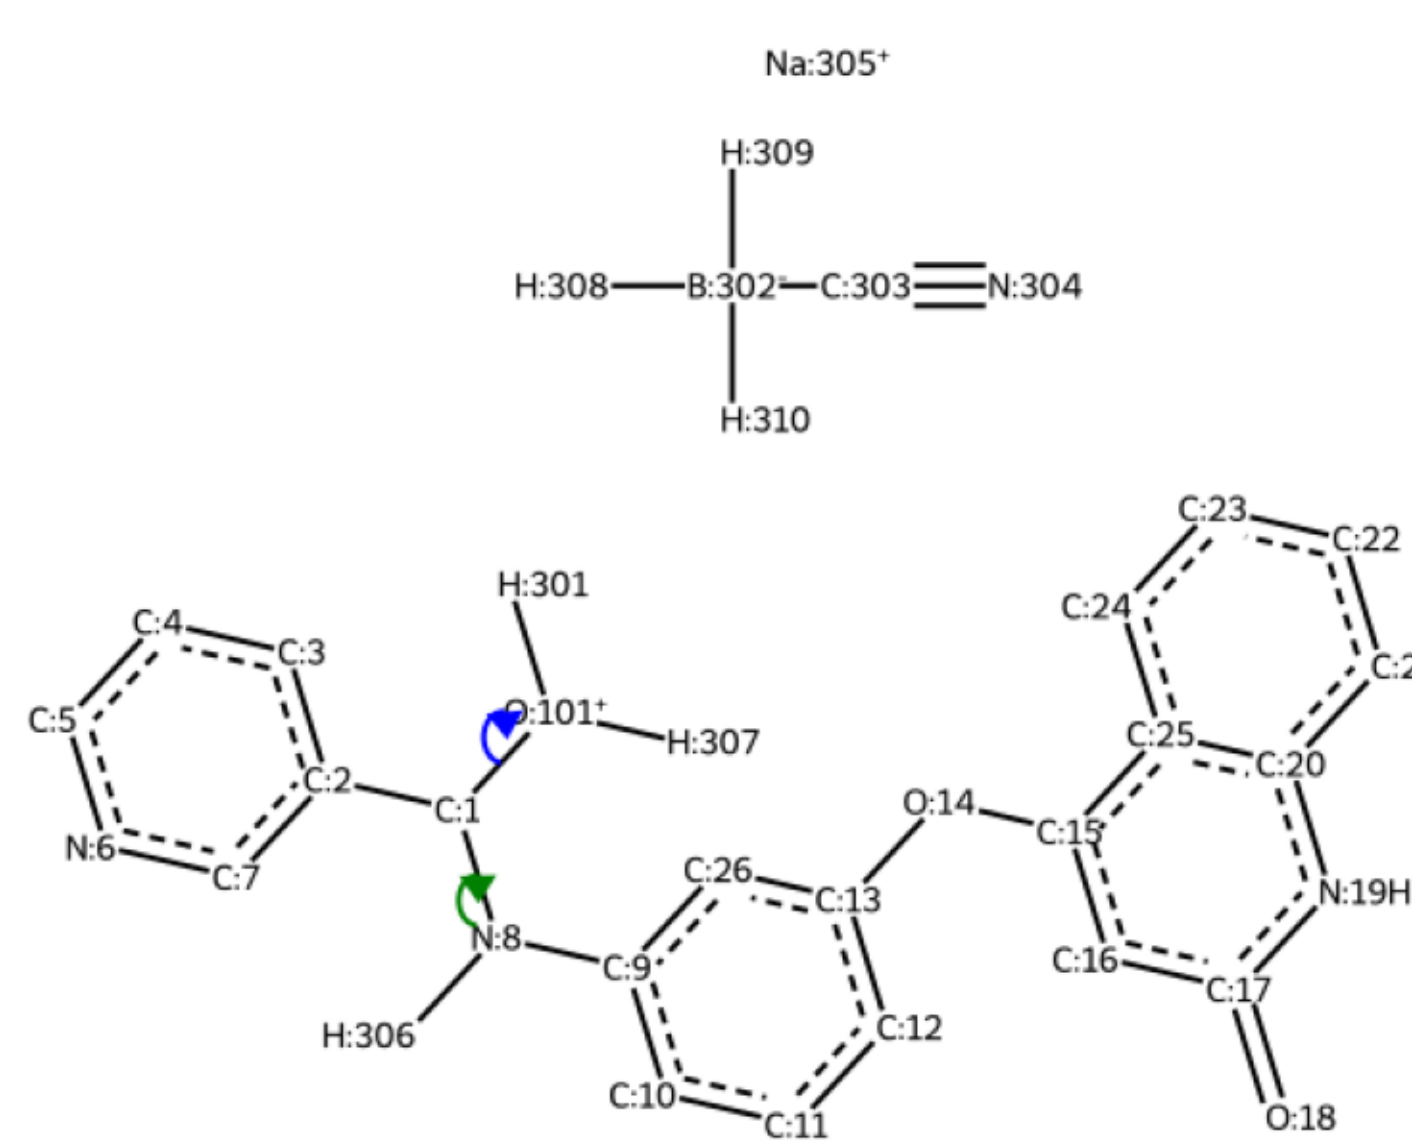

step #4

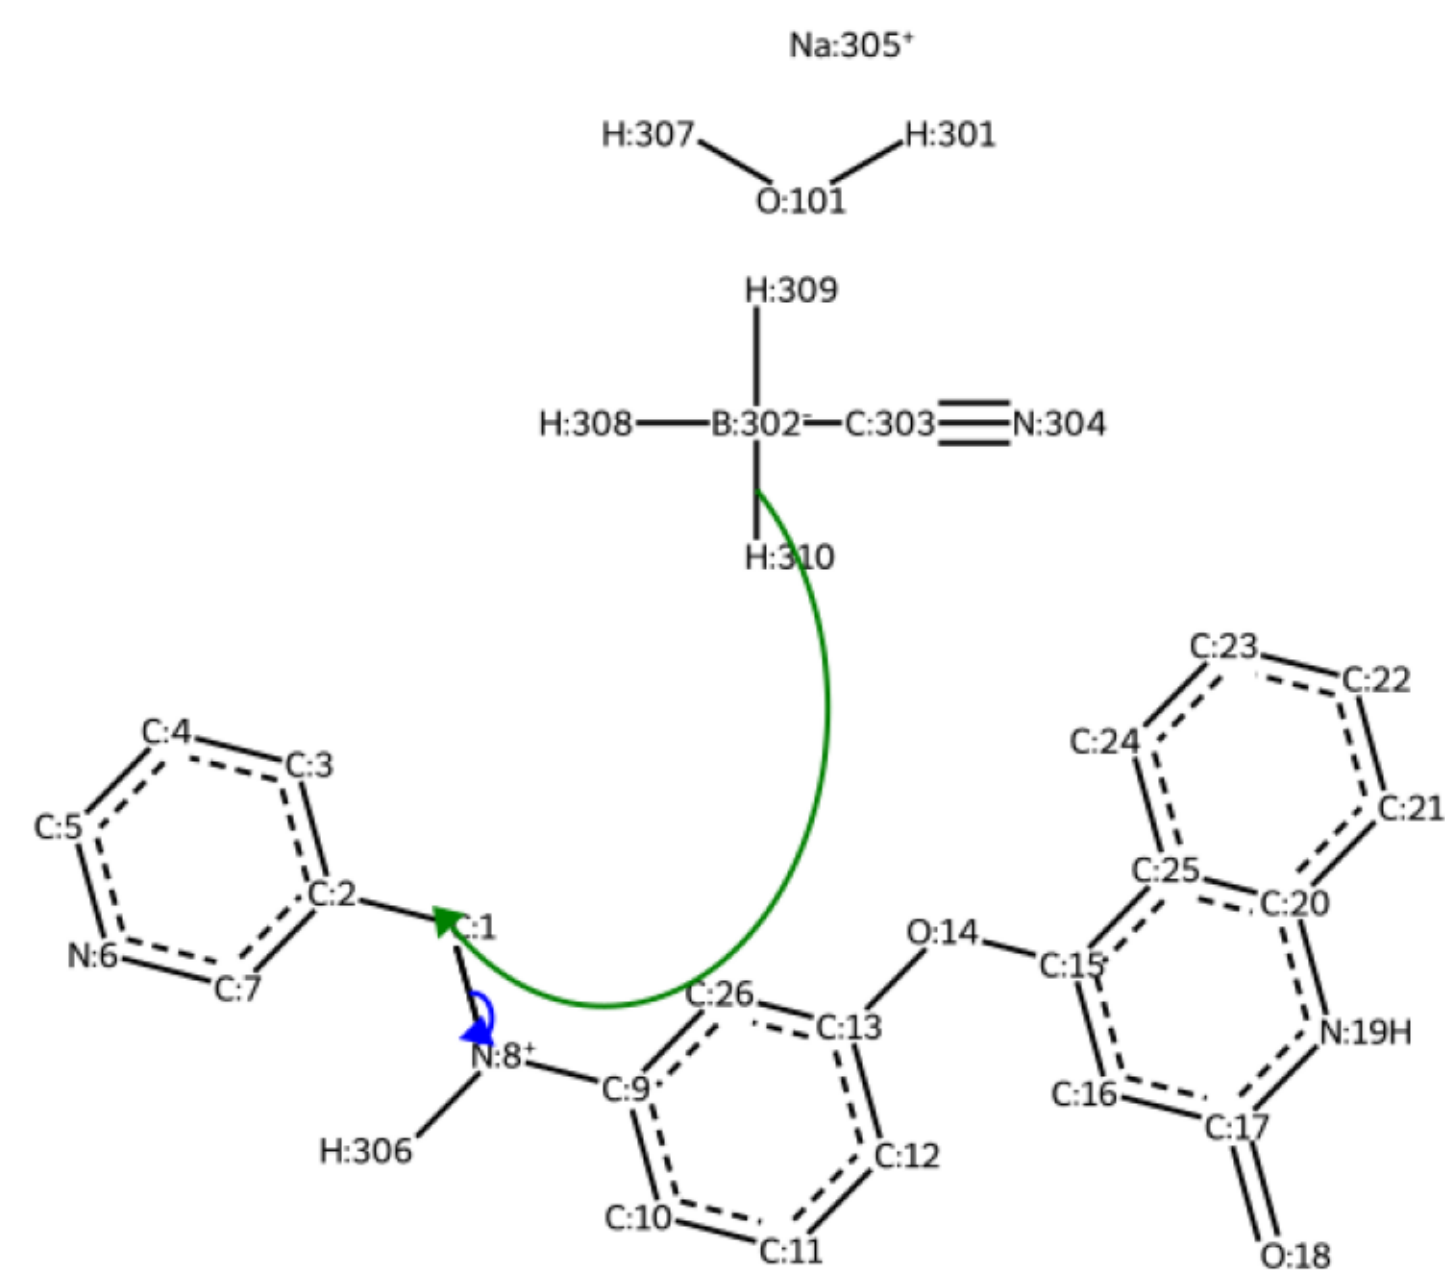

Product(s)

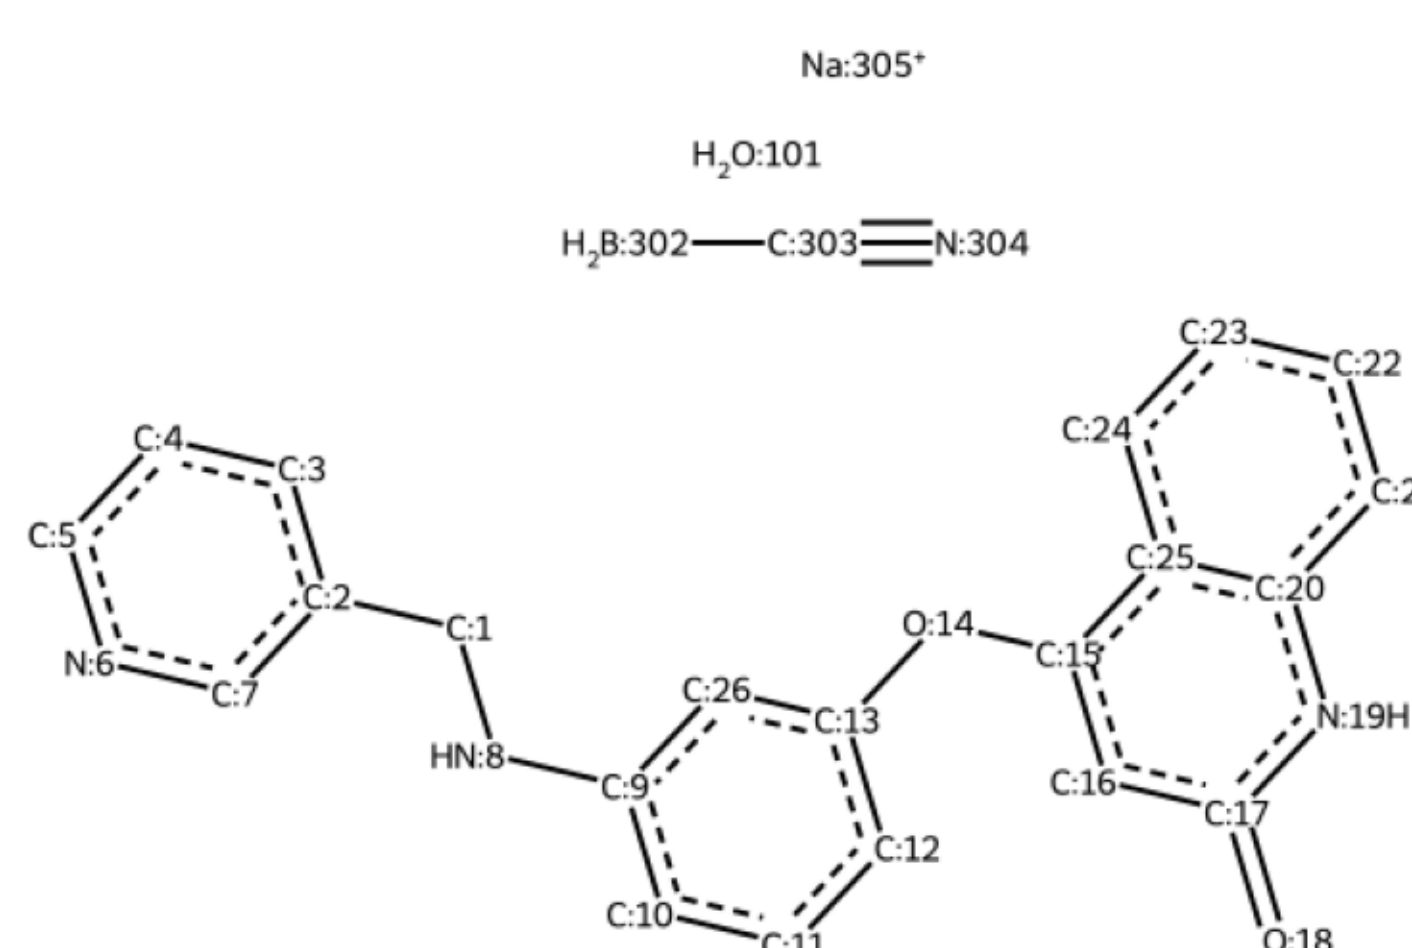



Original reaction  
sampled RXN\_ID:29)

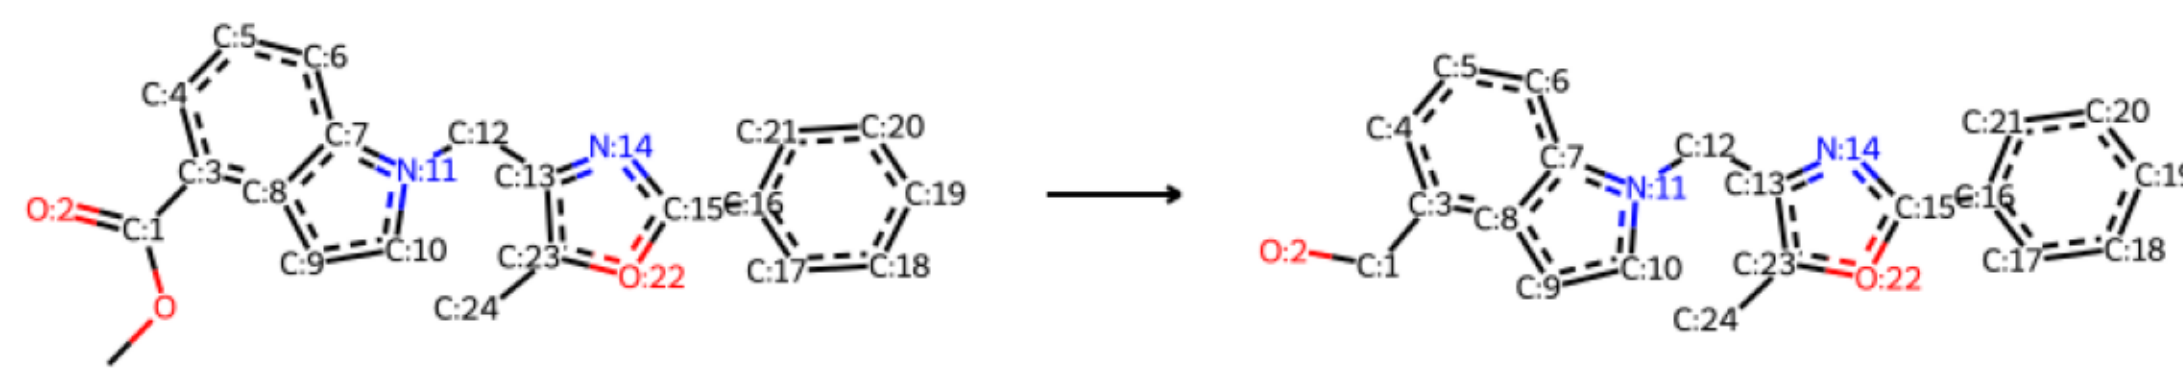

Identified mechanistic class -  
ester\_reduction reaction

Reaction with missing reagents recovered

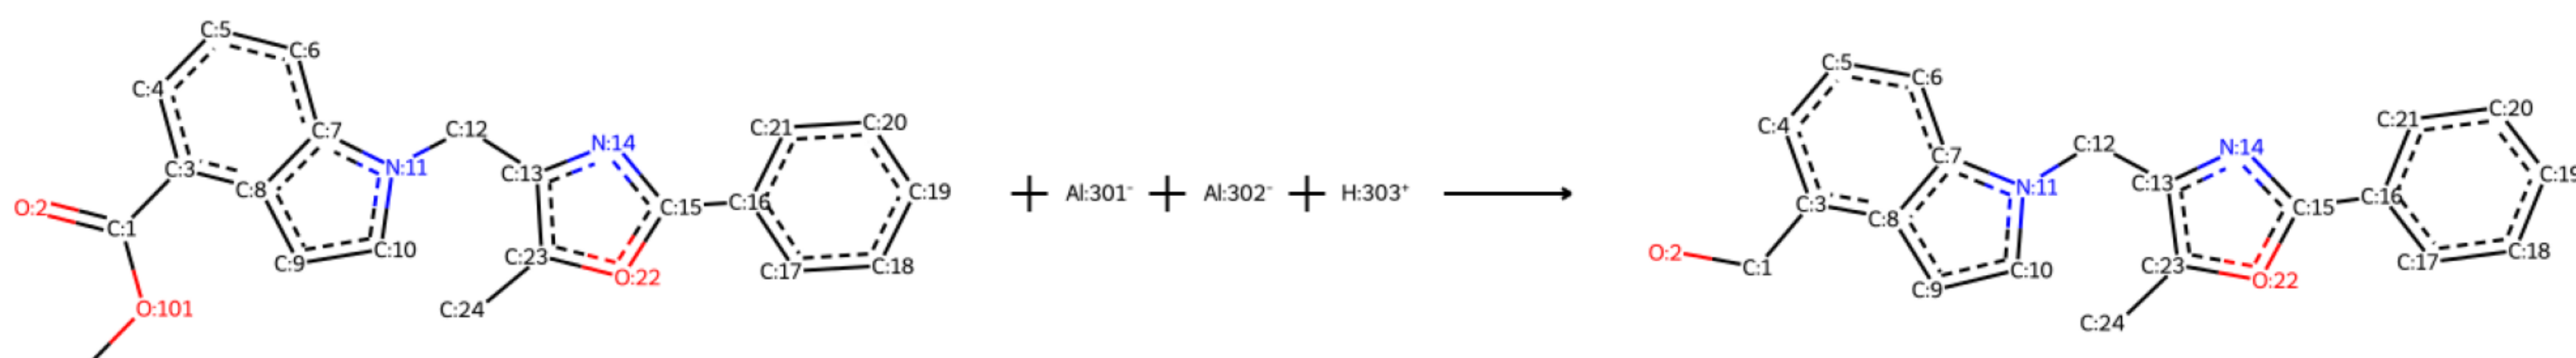

Proposed mechanistic pathway

[Arrow order: (1) green, (2) blue, (3) red, (4) orange]

step #1

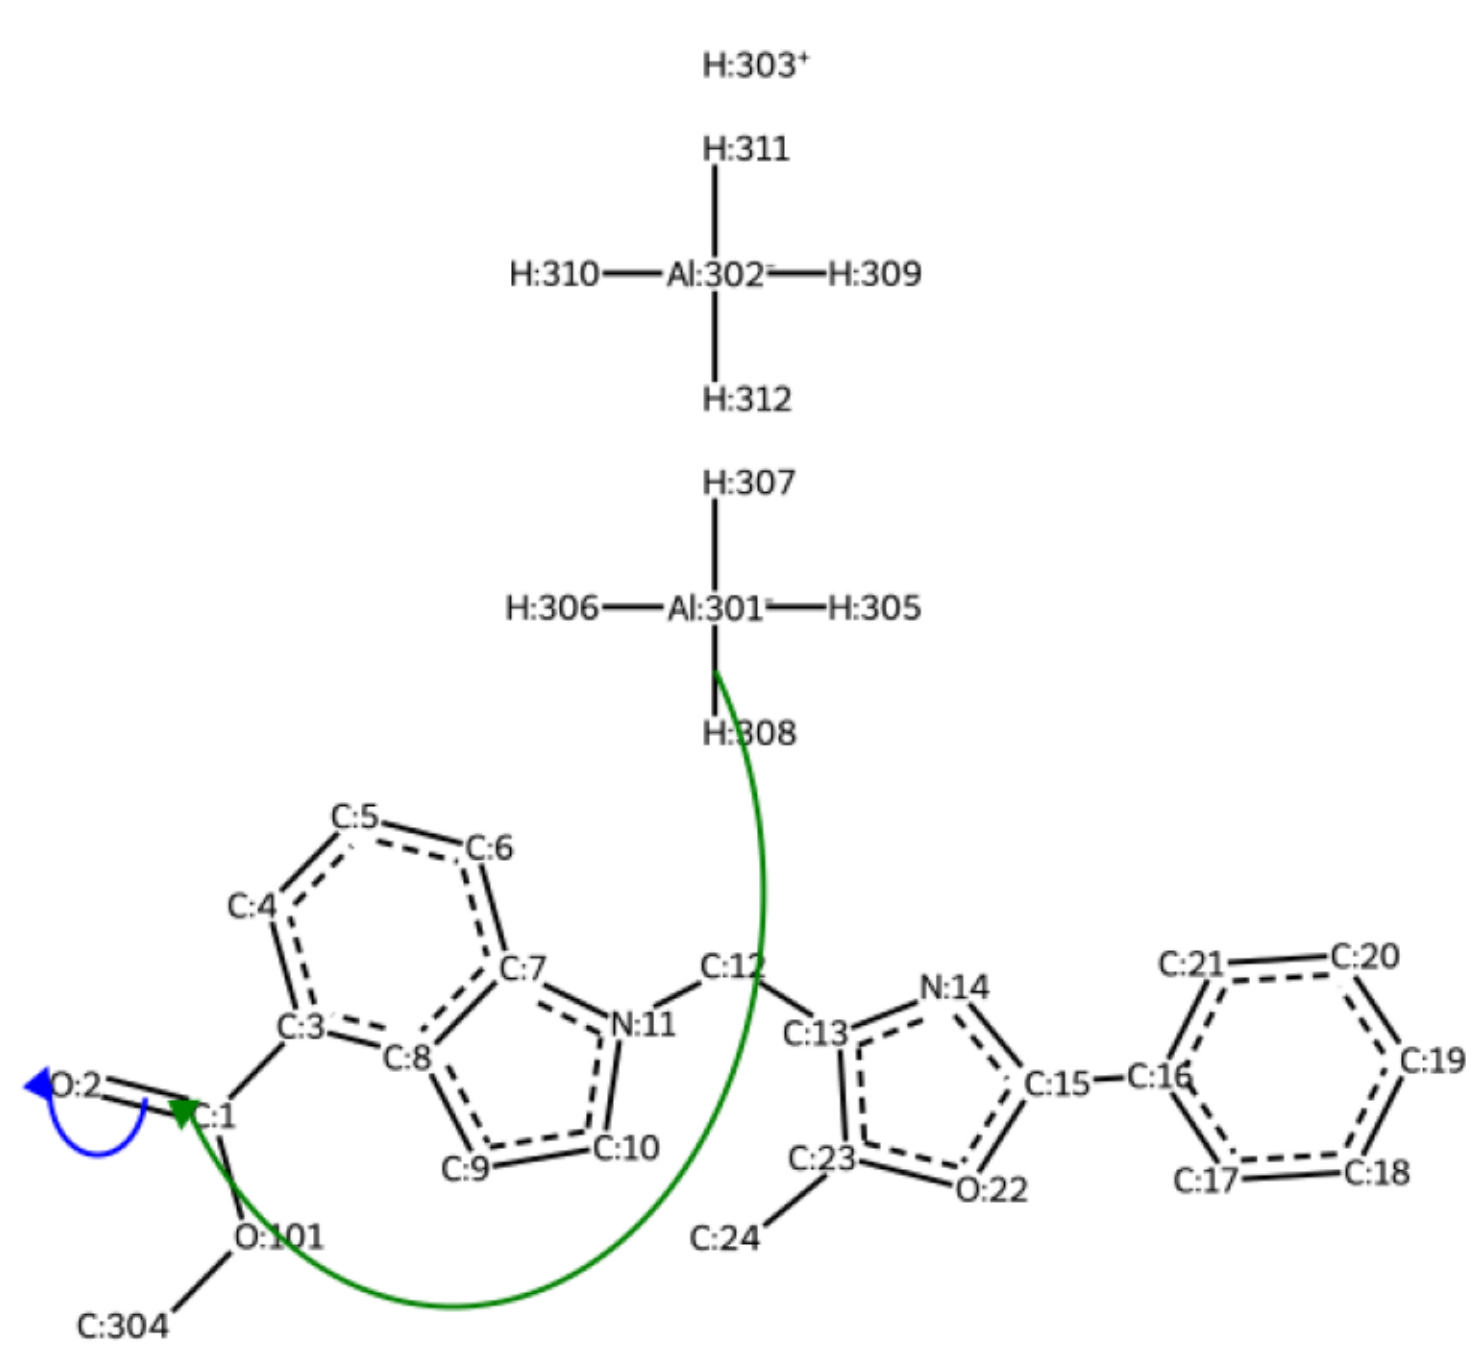

step #2

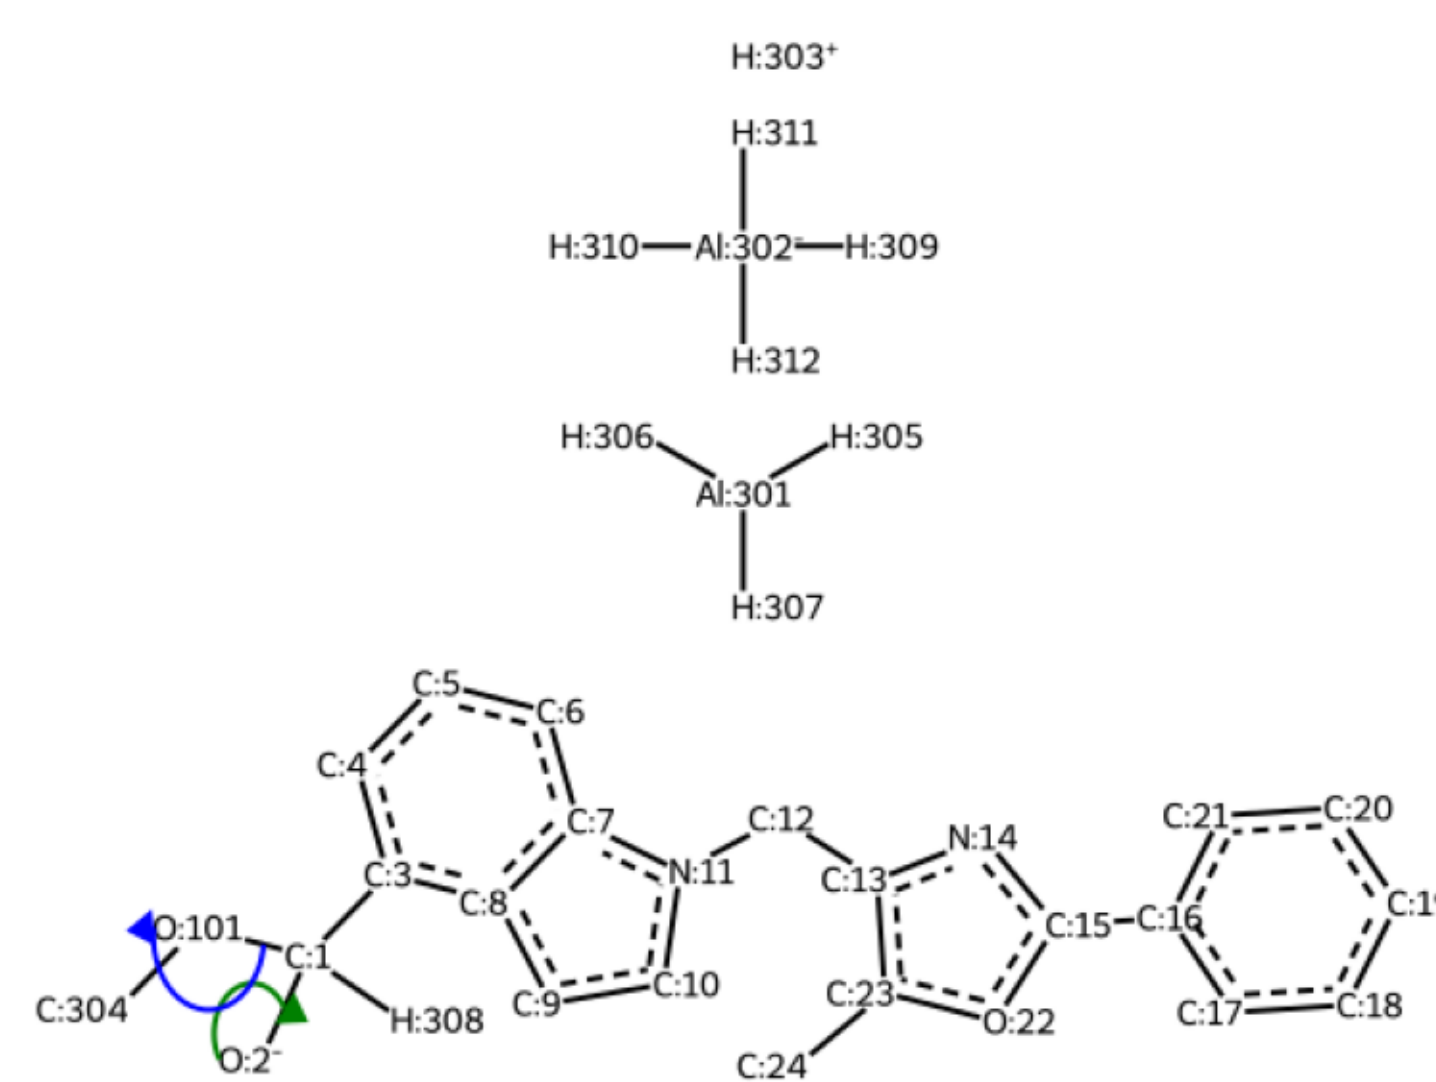

step #3

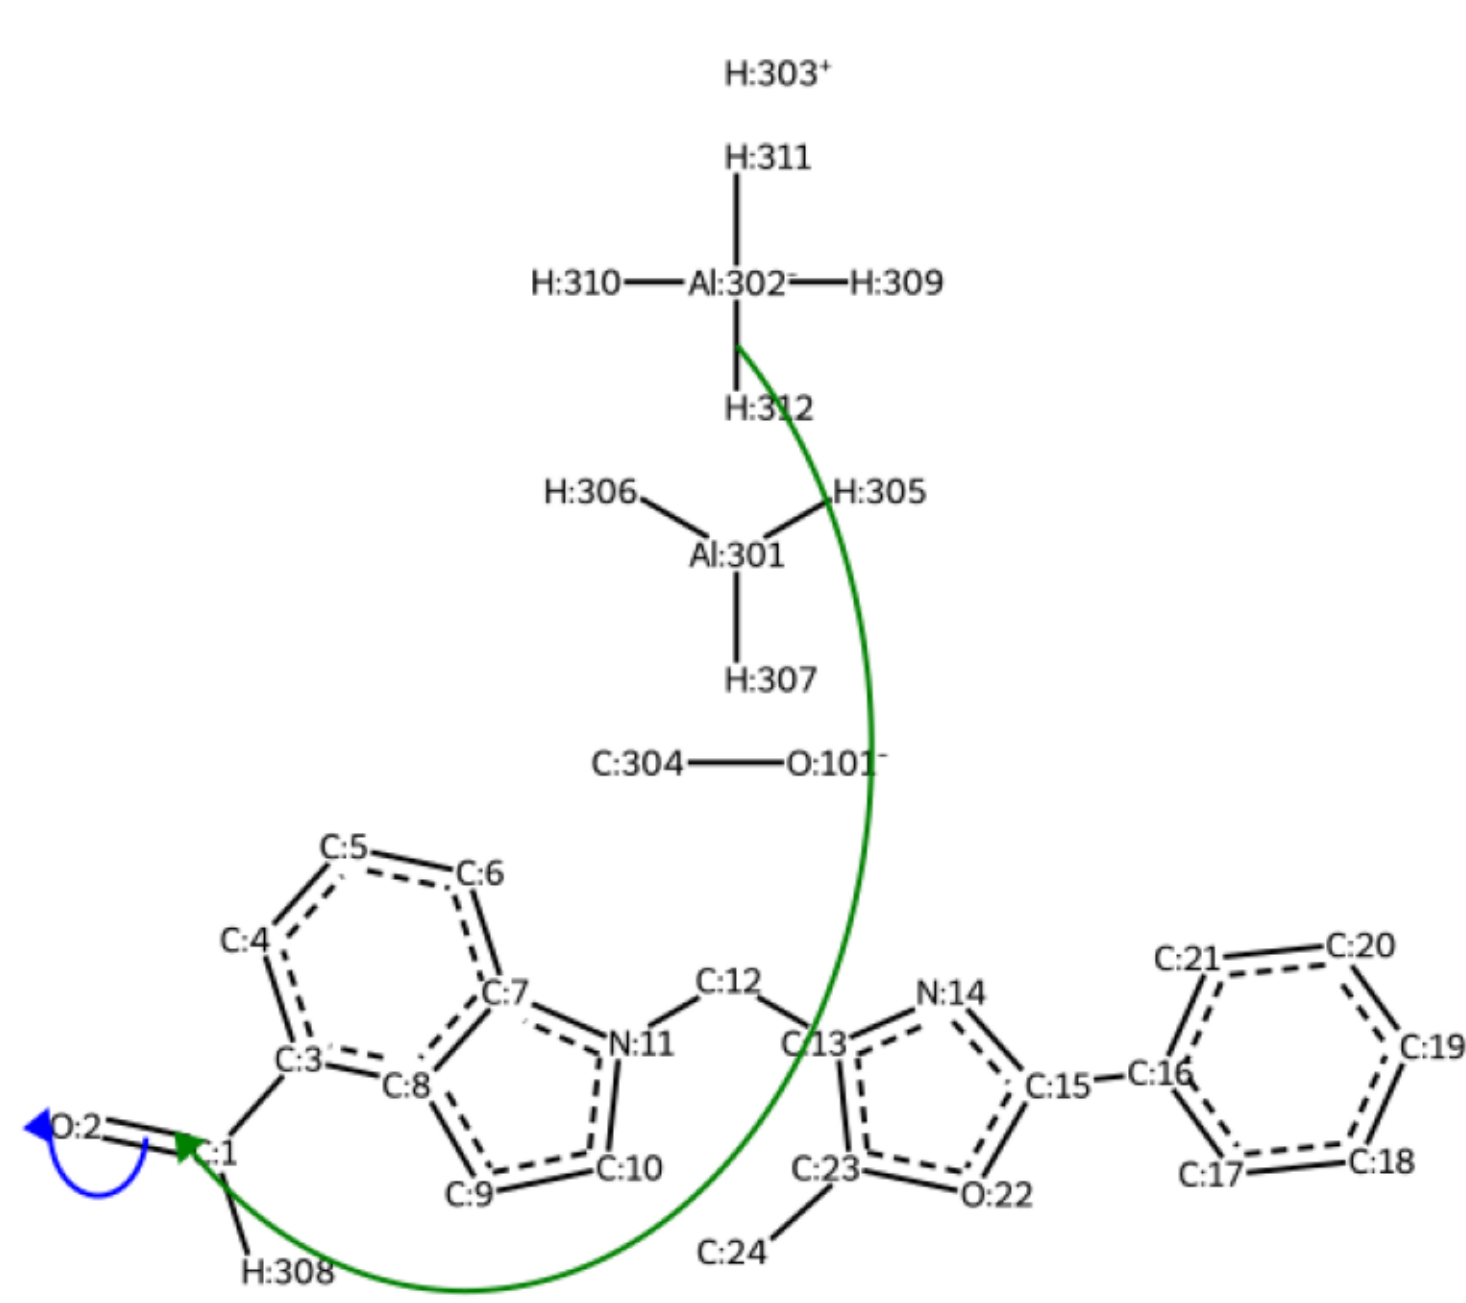

step #4

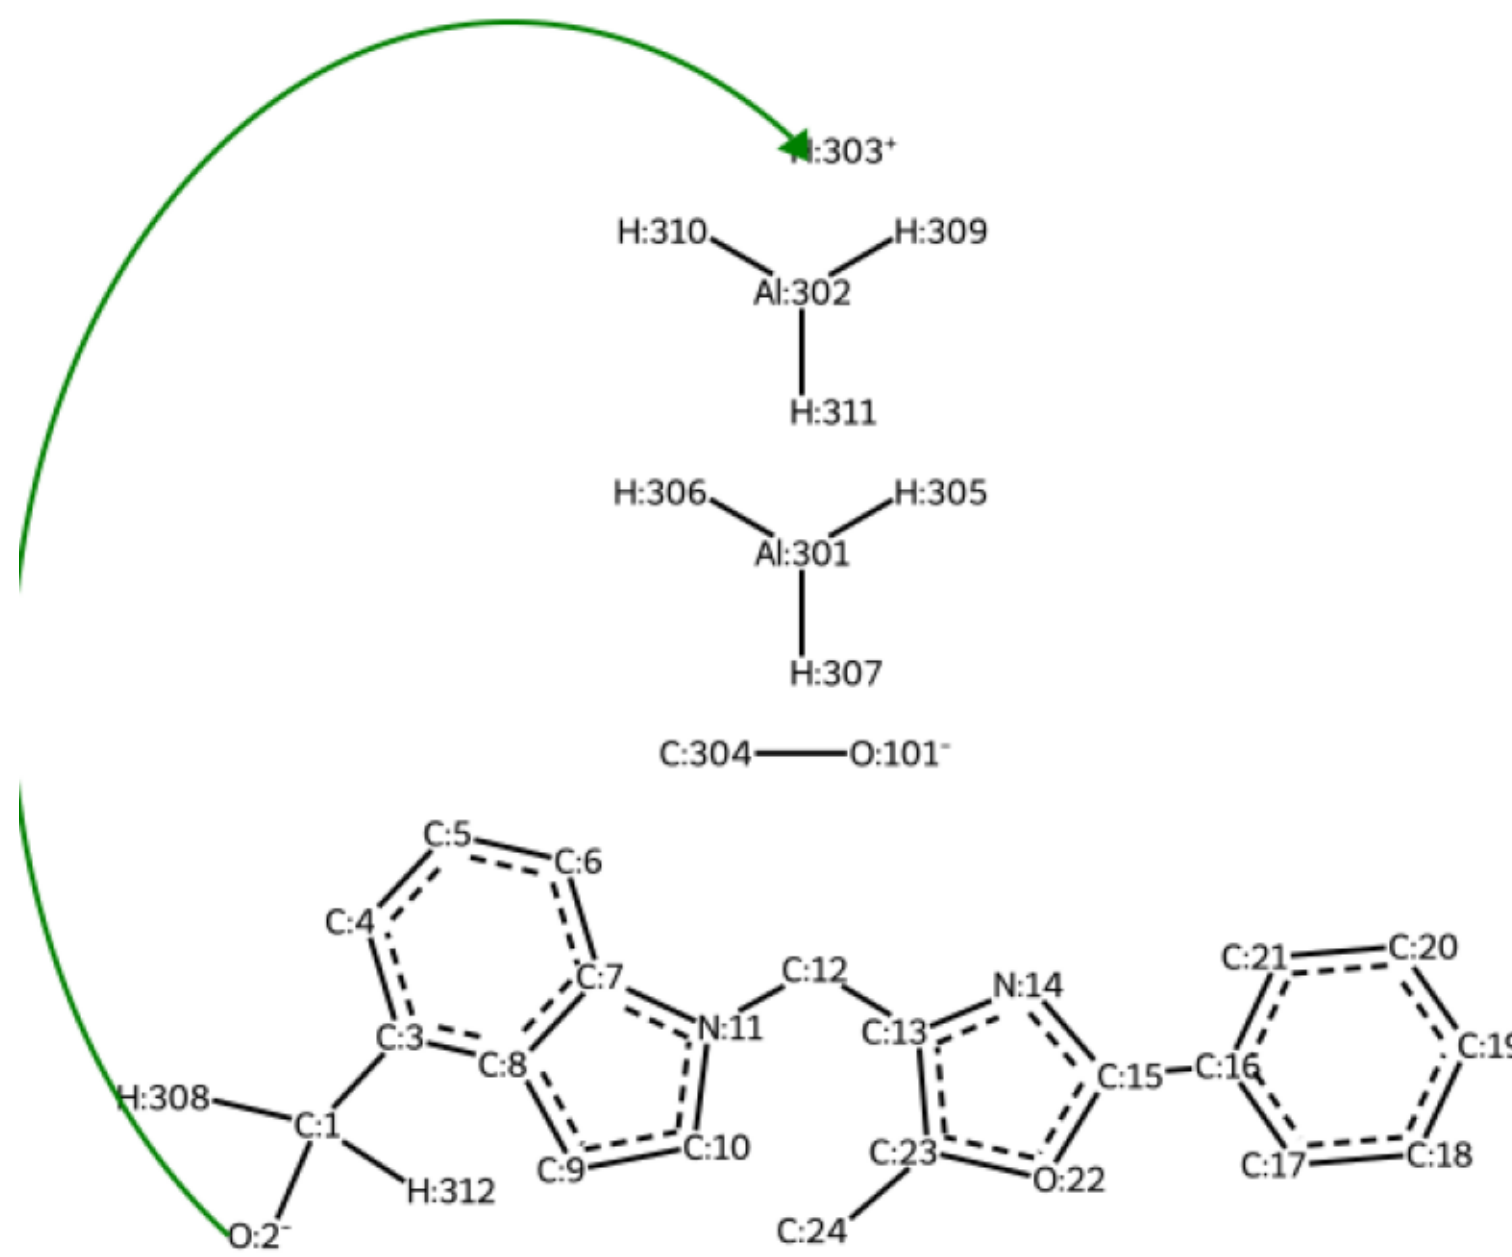

Product(s)

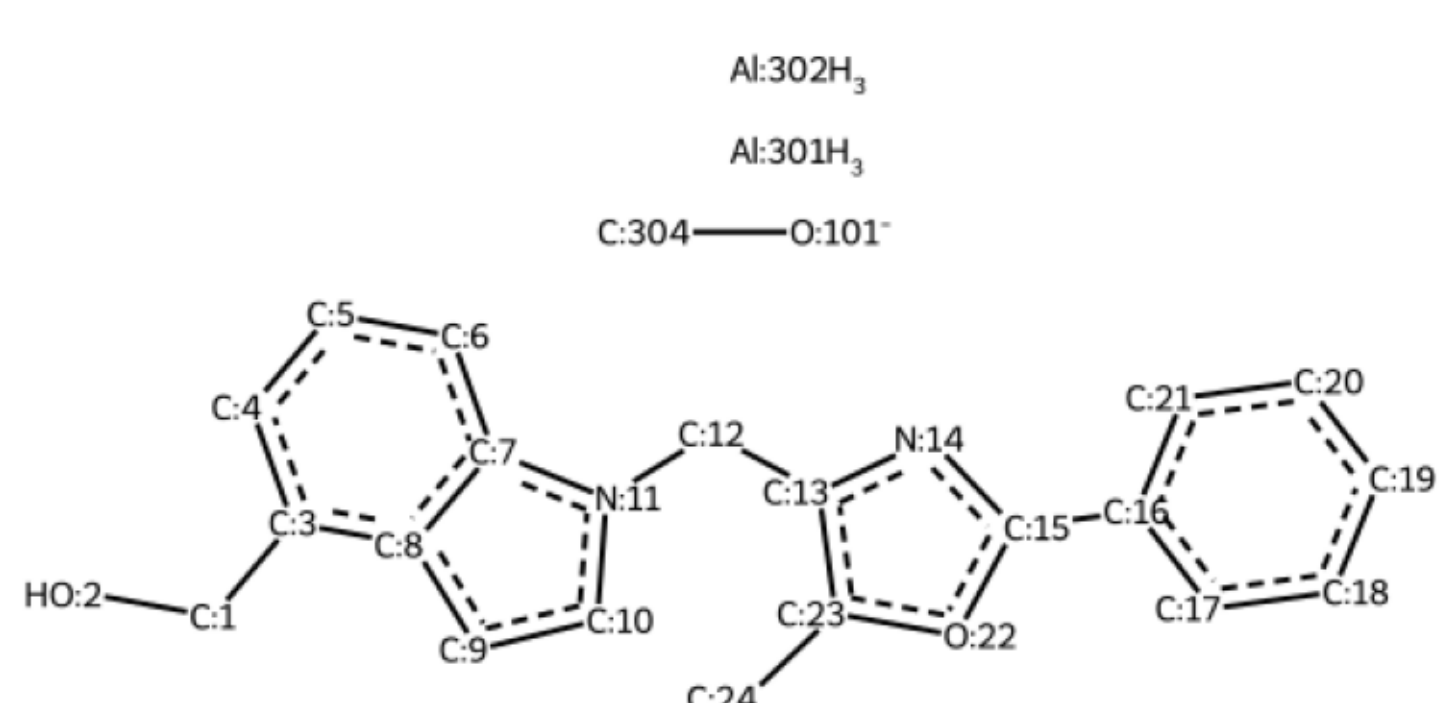



Original reaction  
sampled RXN\_ID:30)

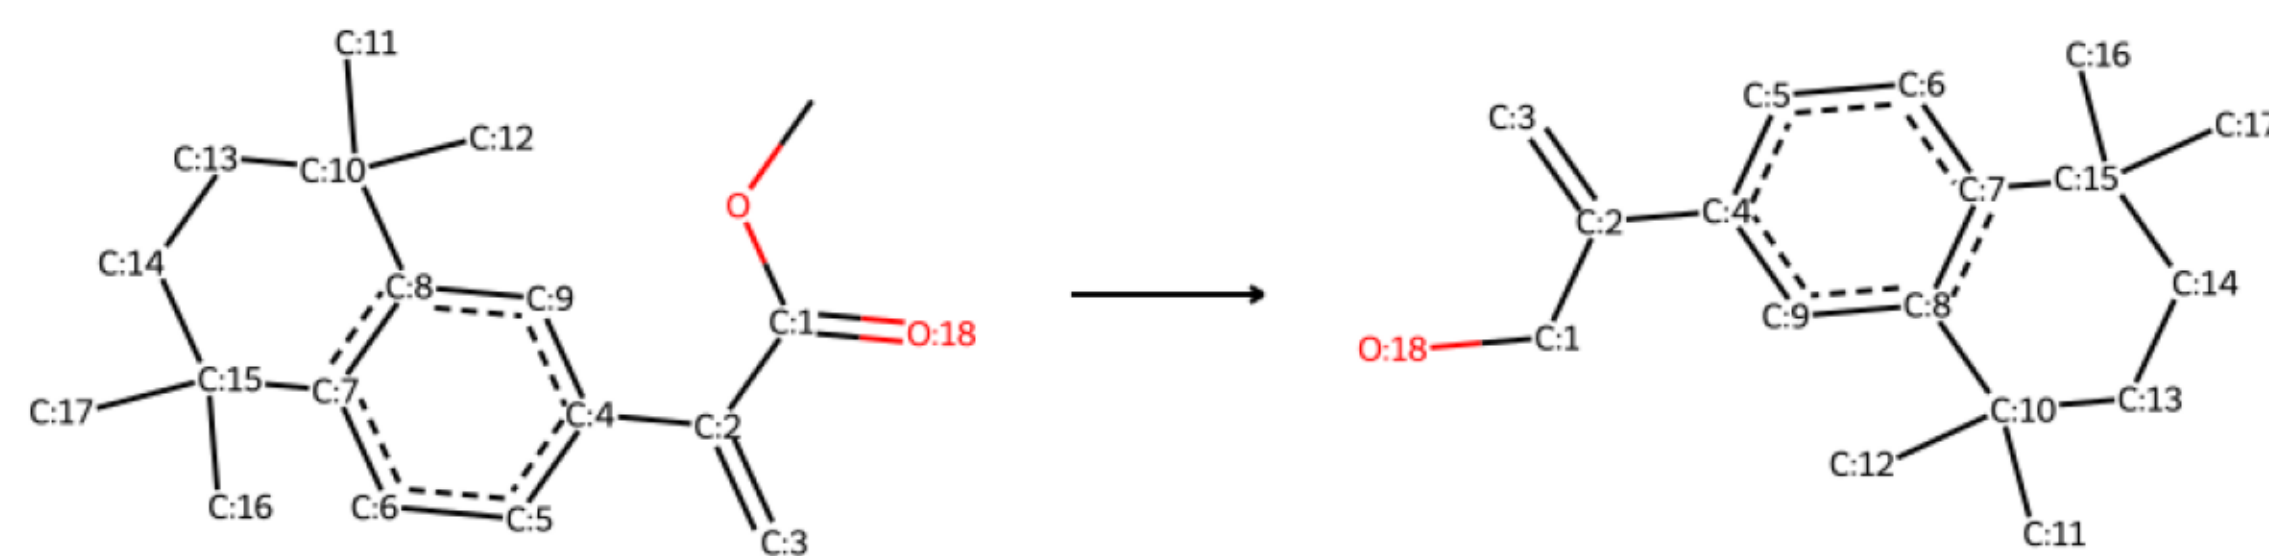

Identified mechanistic class -  
ester\_reduction reaction

Reaction with missing reagents recovered

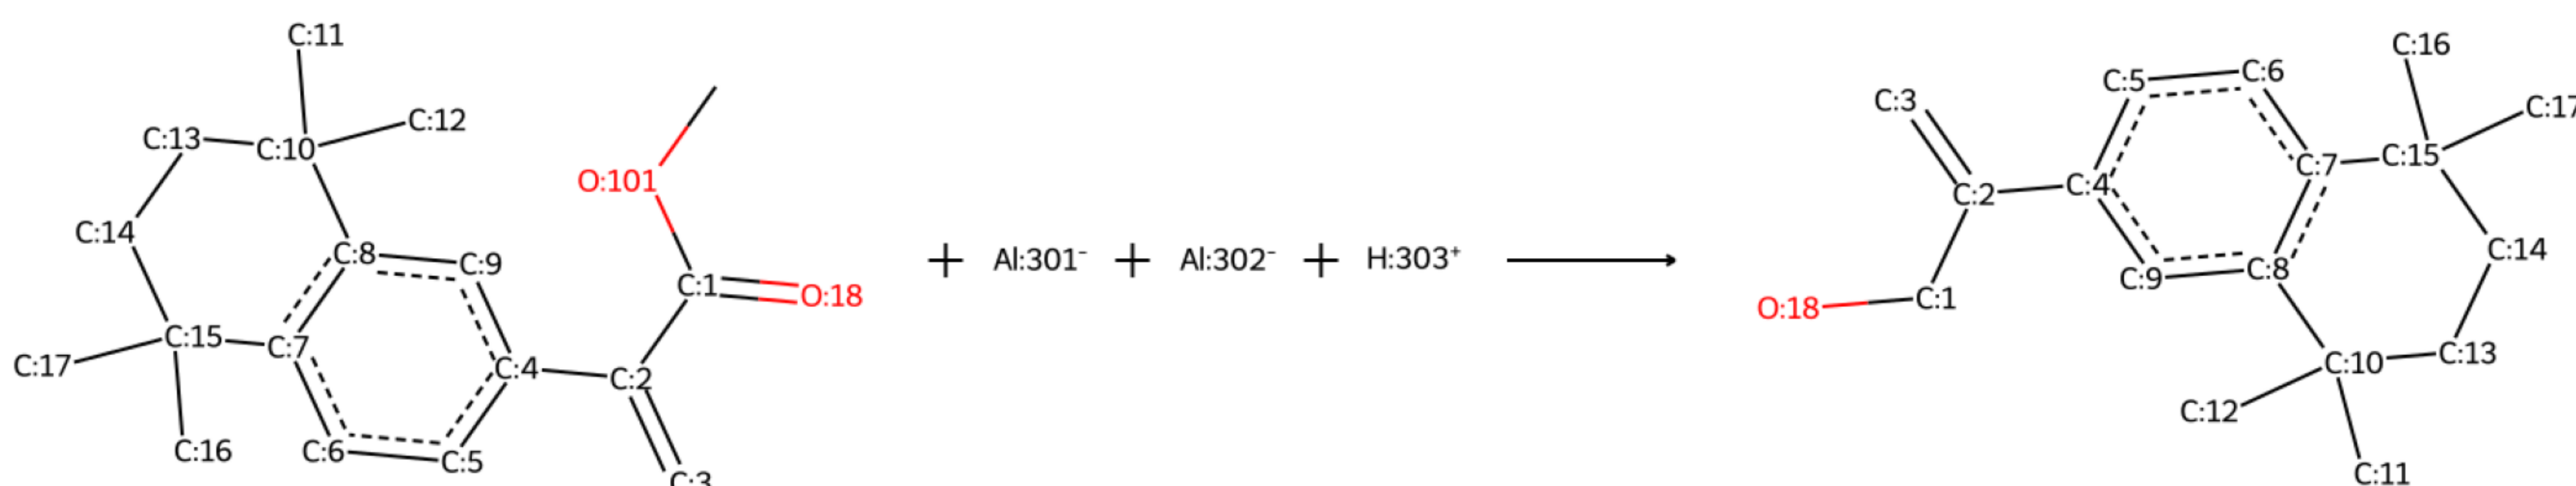

Proposed mechanistic pathway

[Arrow order: (1) green, (2) blue, (3) red, (4) orange]

step #1

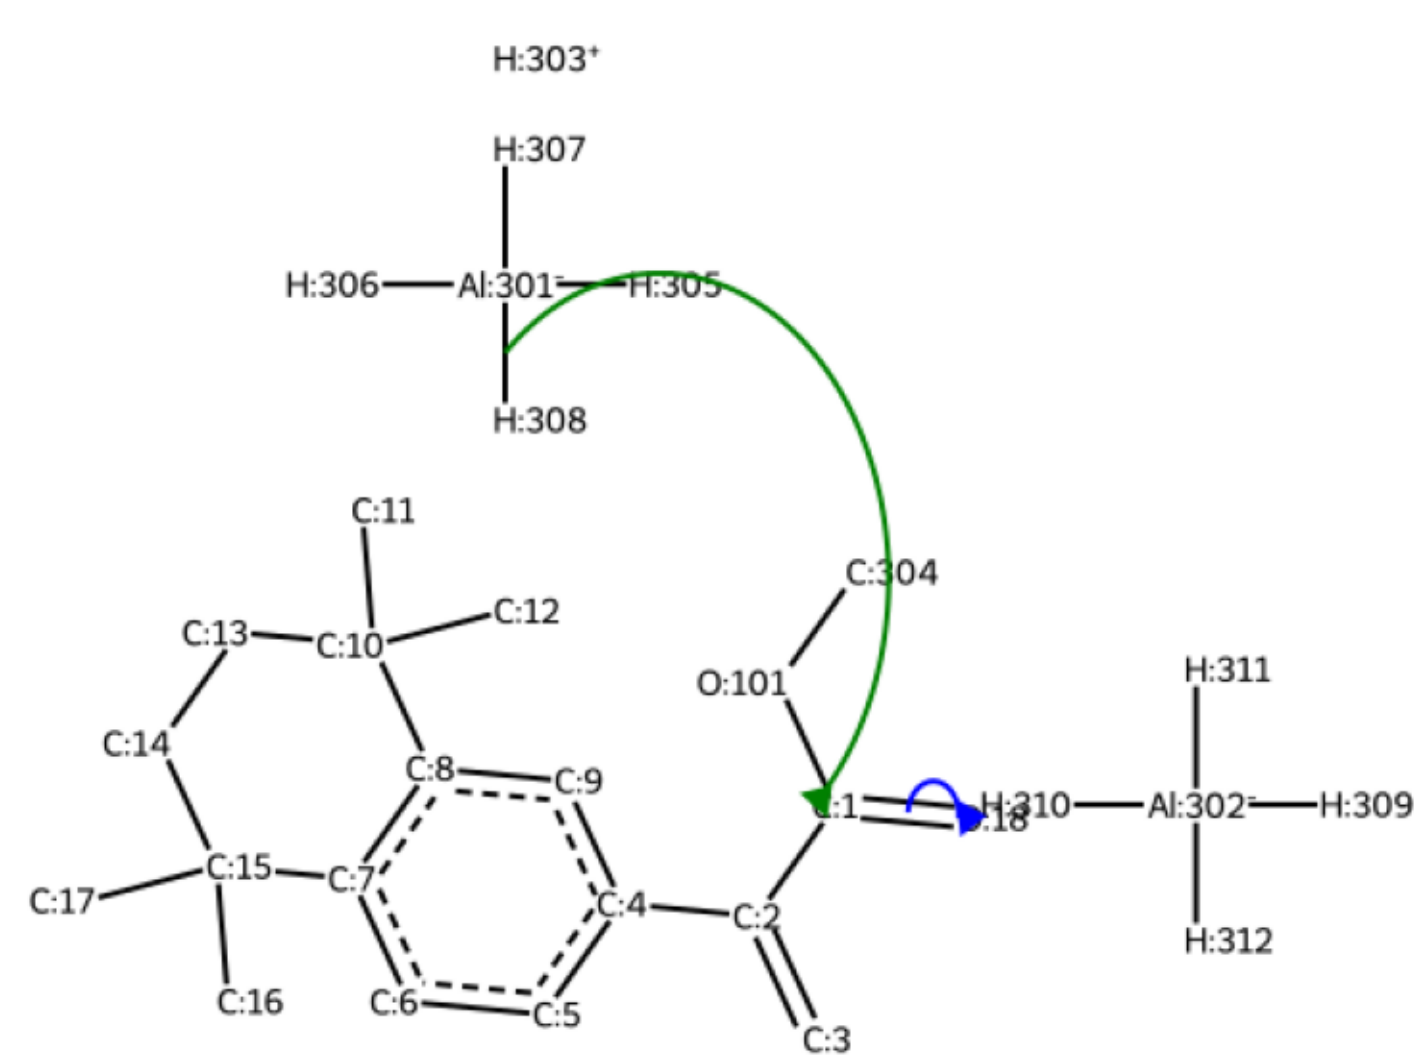

step #2

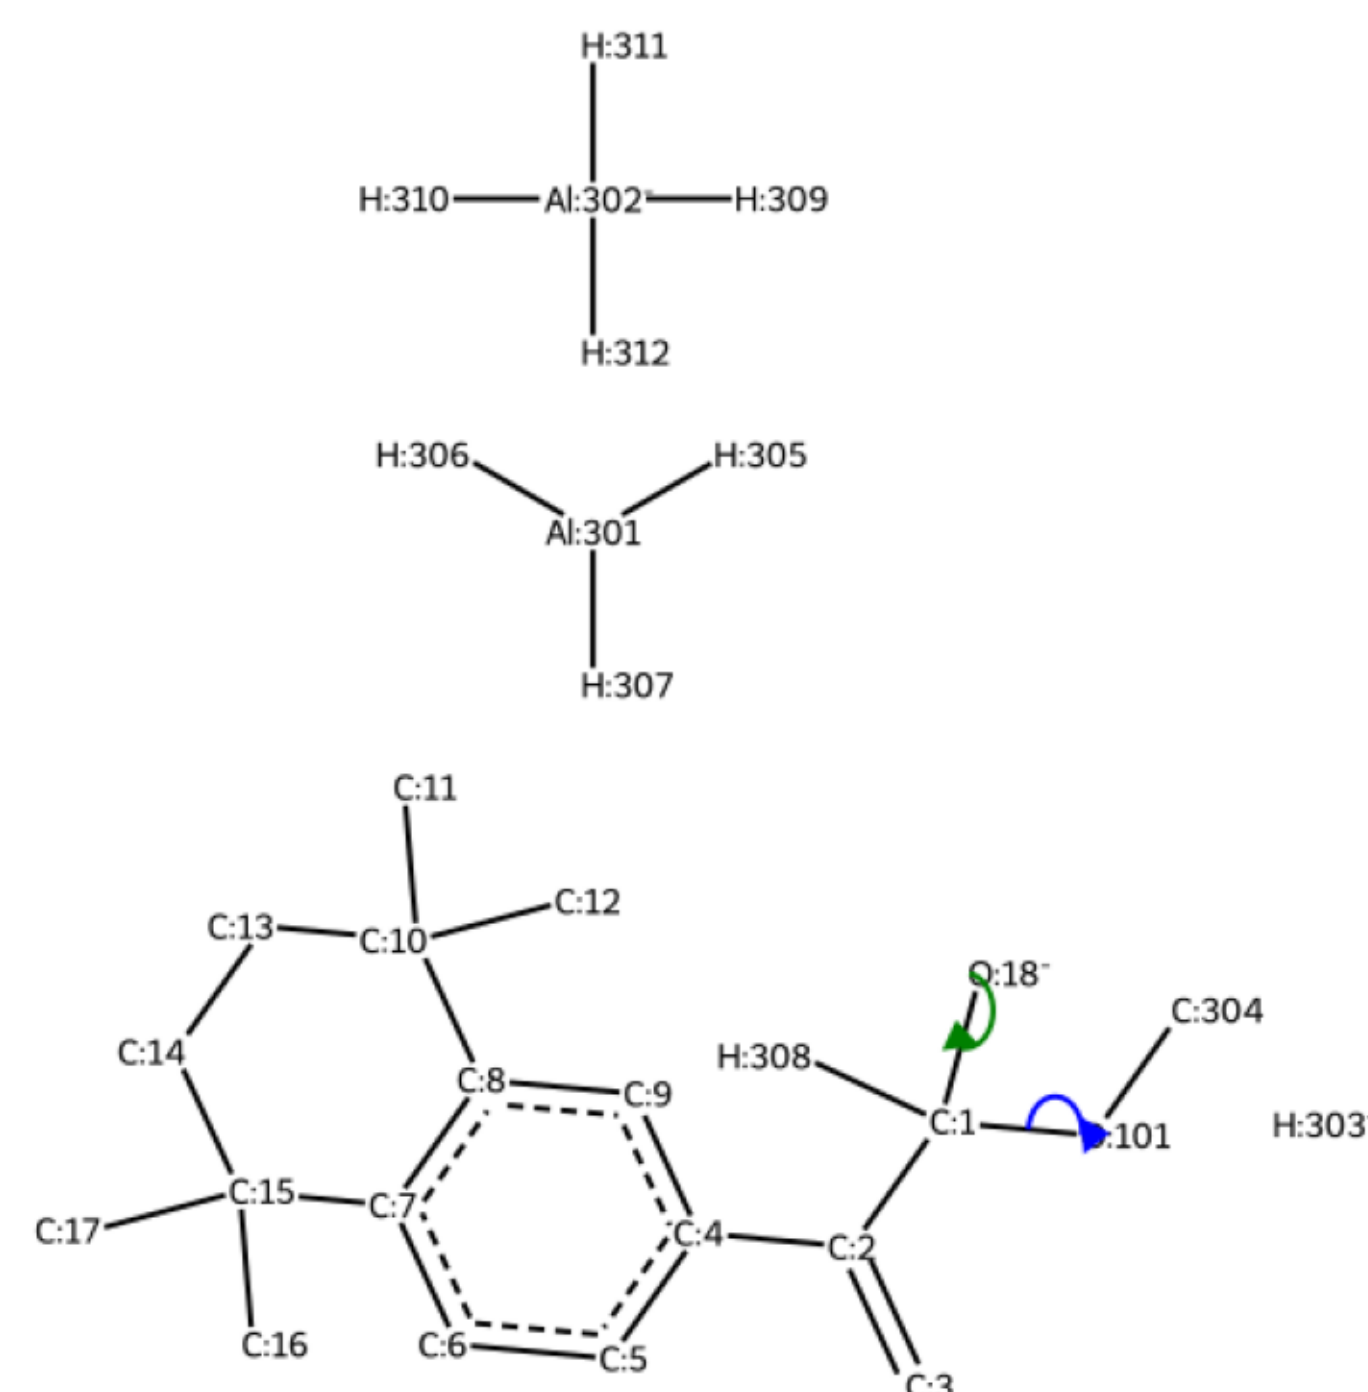

step #3

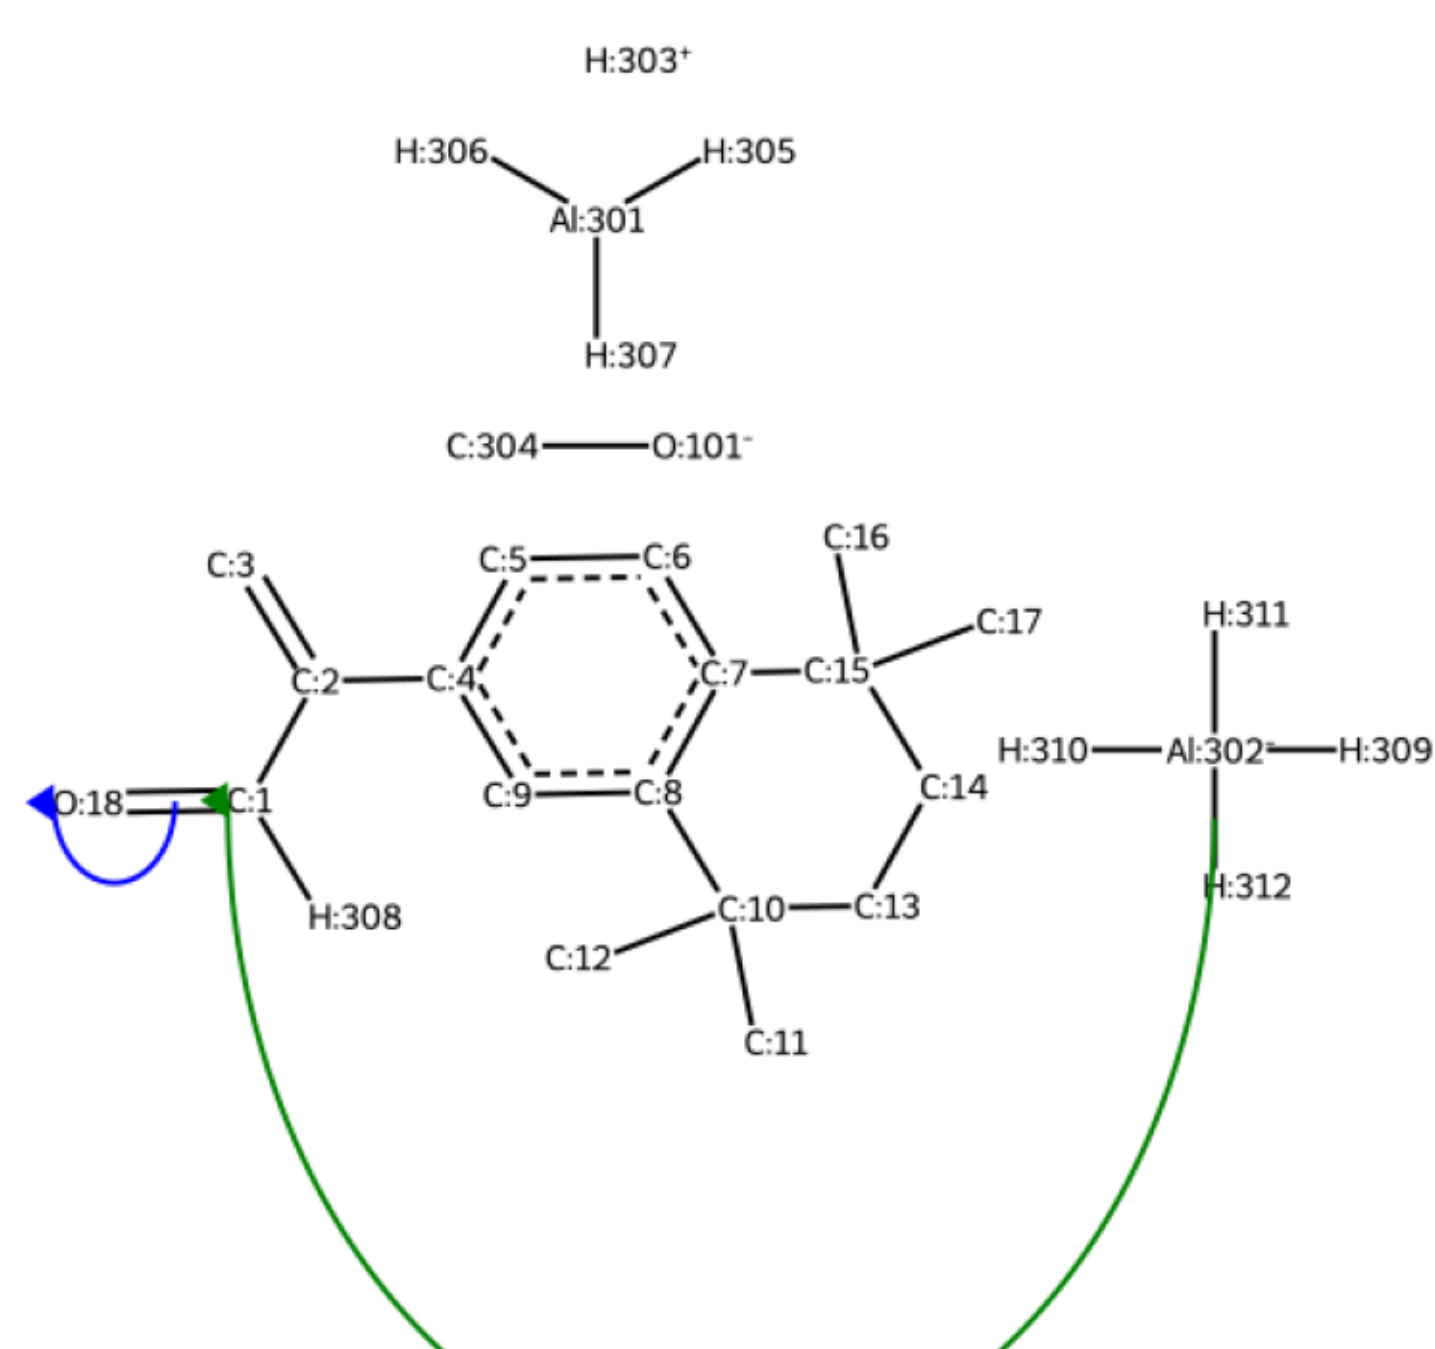

step #4

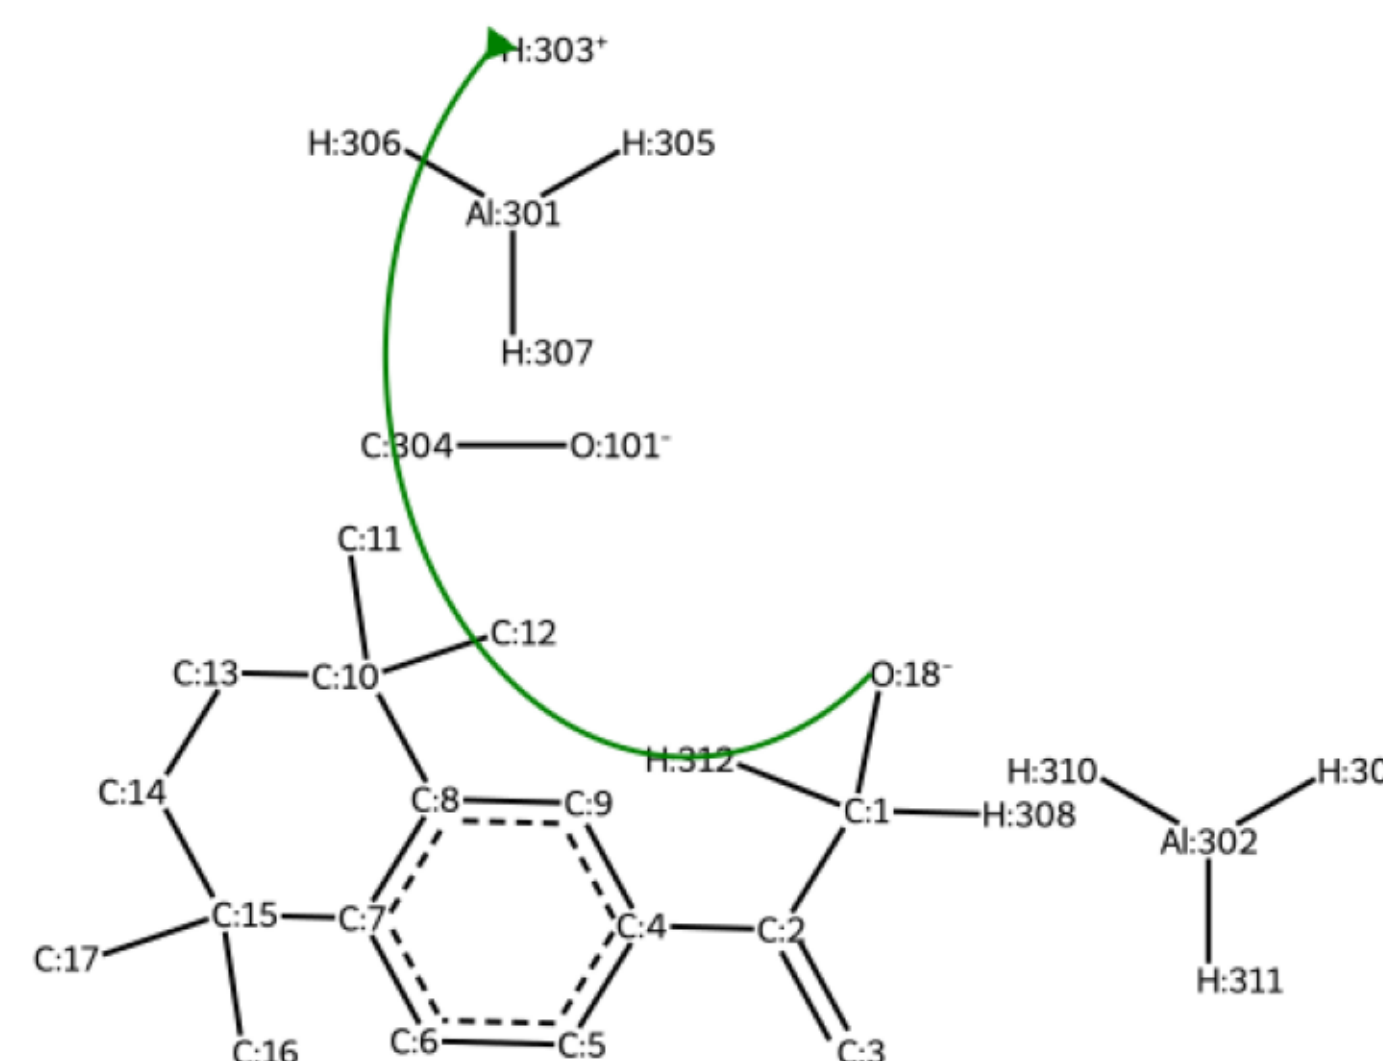

Product(s)

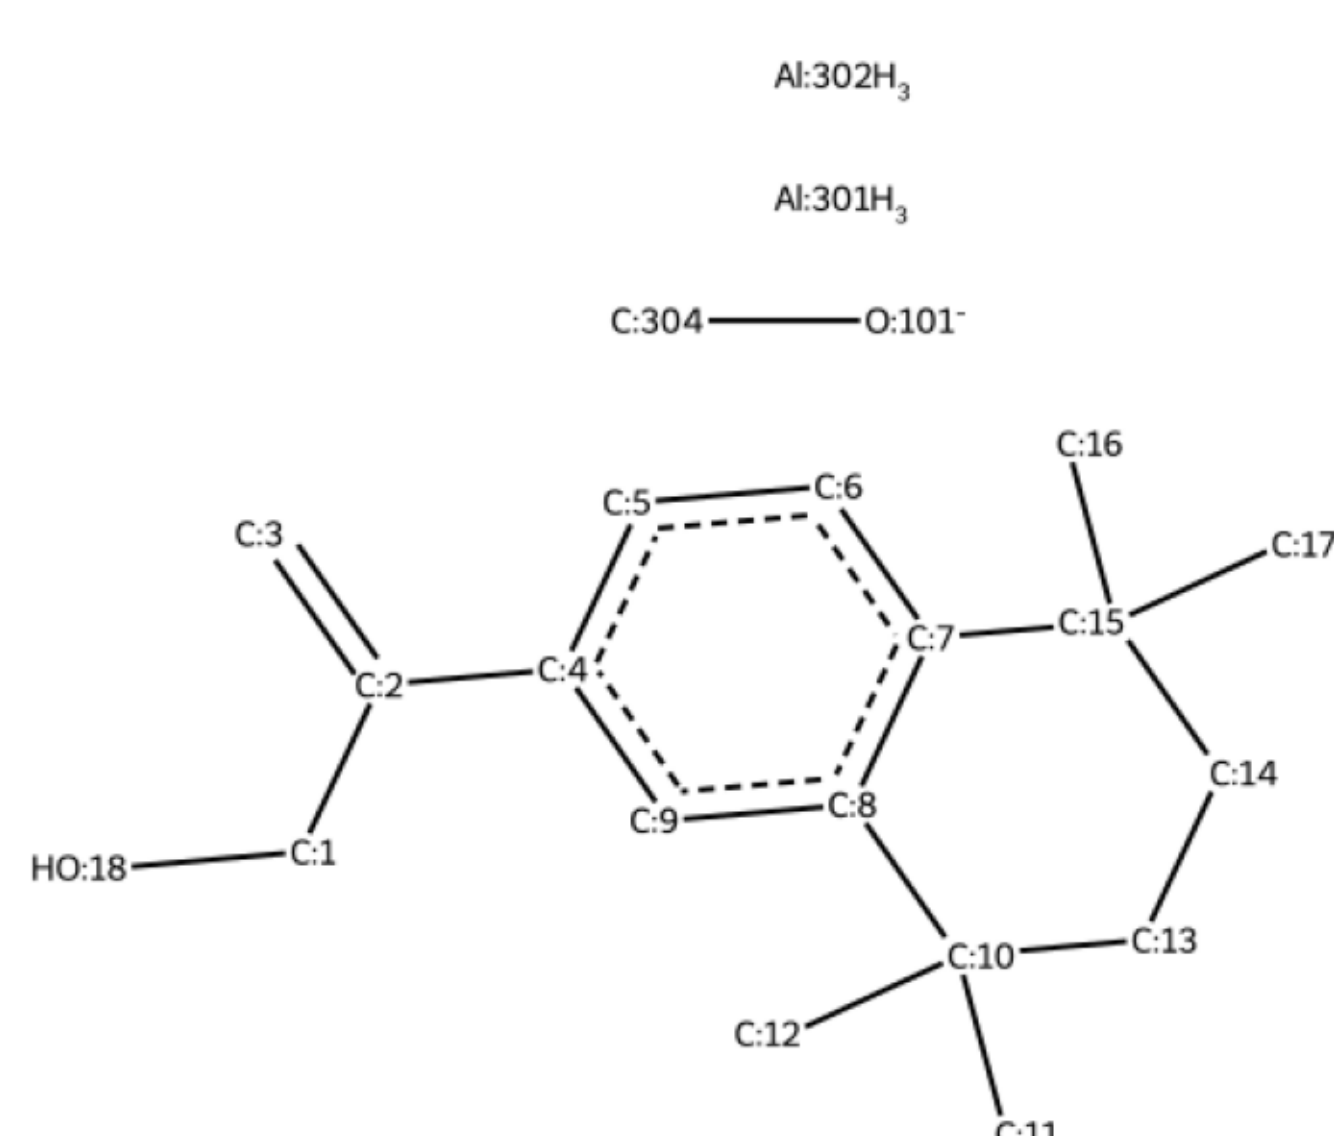

# Original reaction sampled RXN\_ID:31)

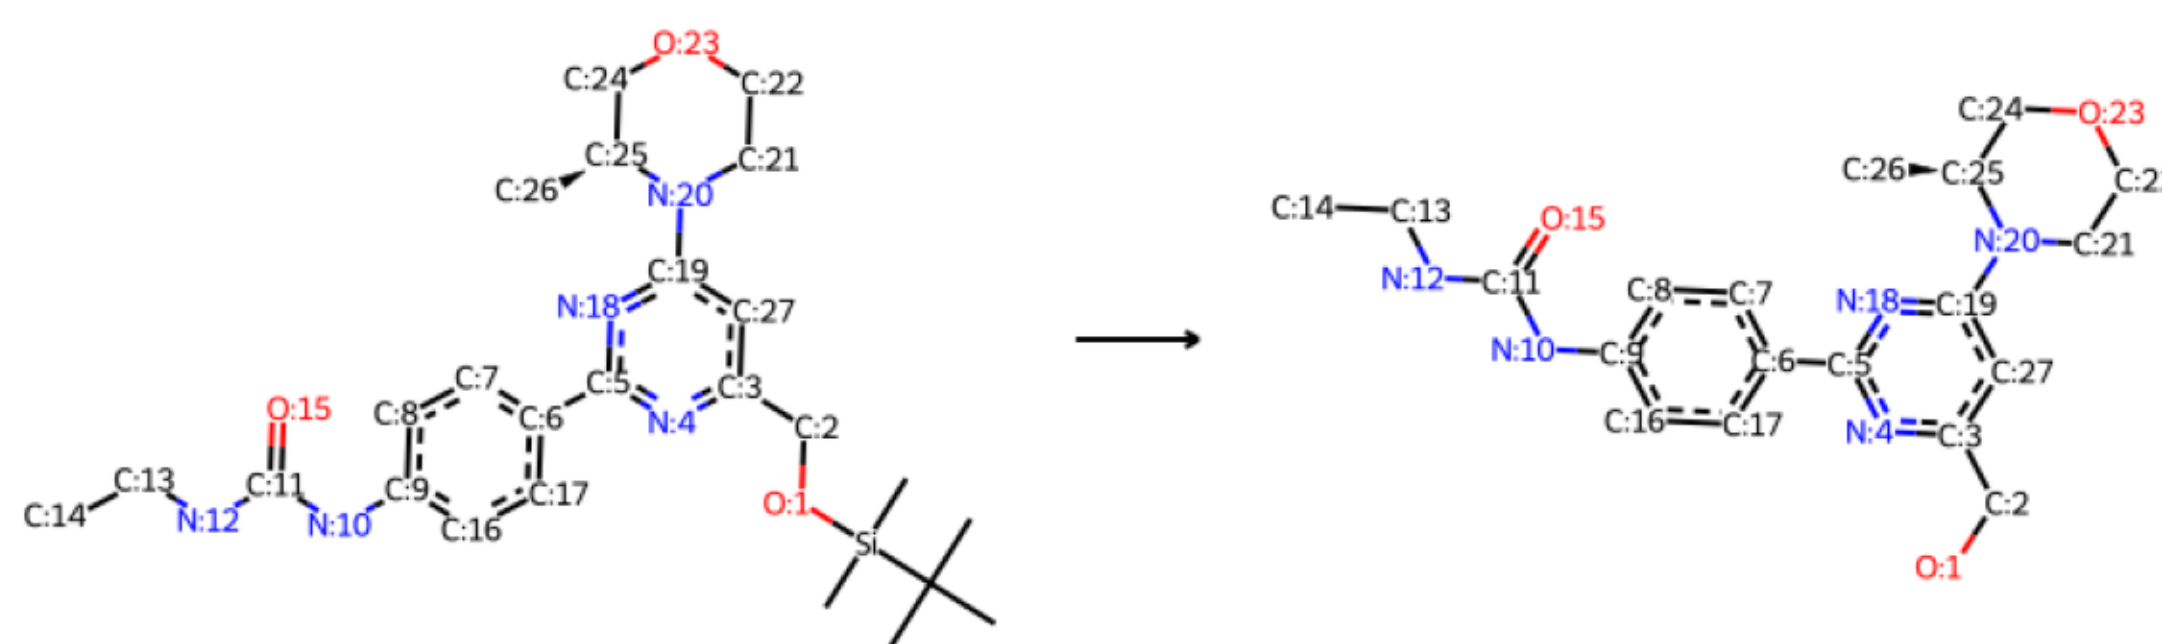

Identified mechanistic class -  
SN2 reaction

## Reaction with missing reagents recovered

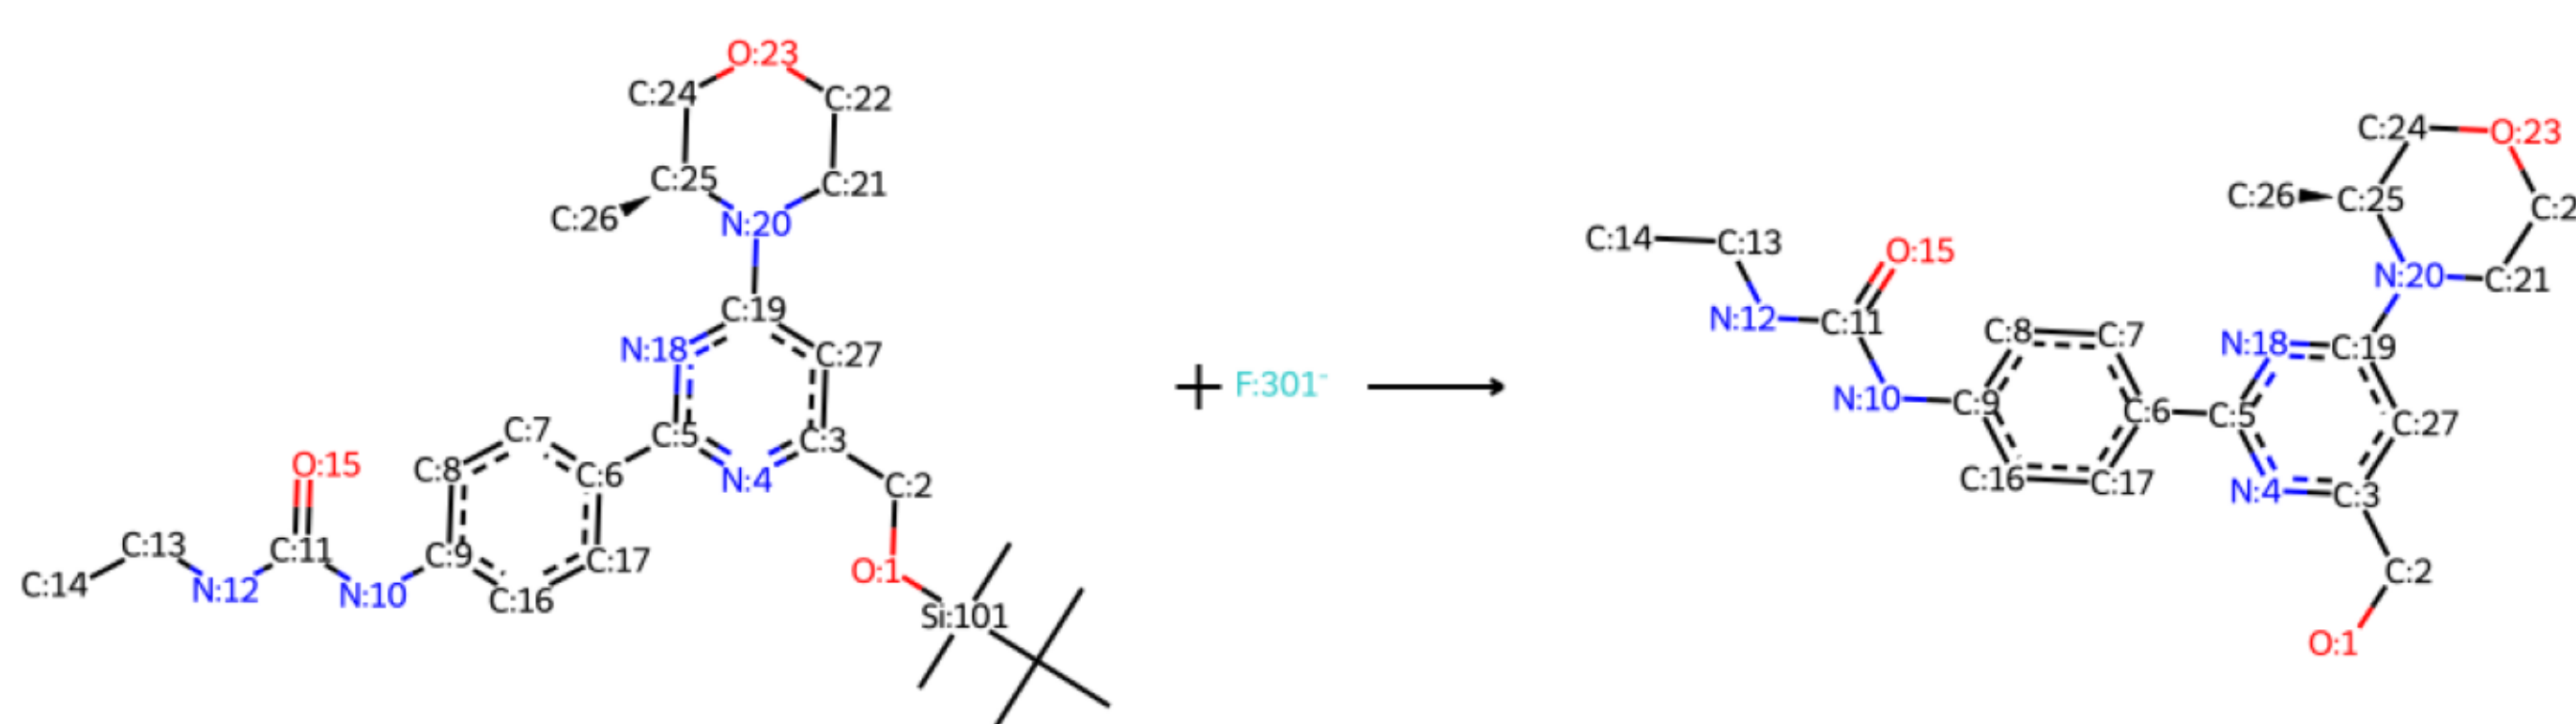

## Proposed mechanistic pathway

[Arrow order: (1) green, (2) blue, (3) red, (4) orange]

step #1

Product(s)

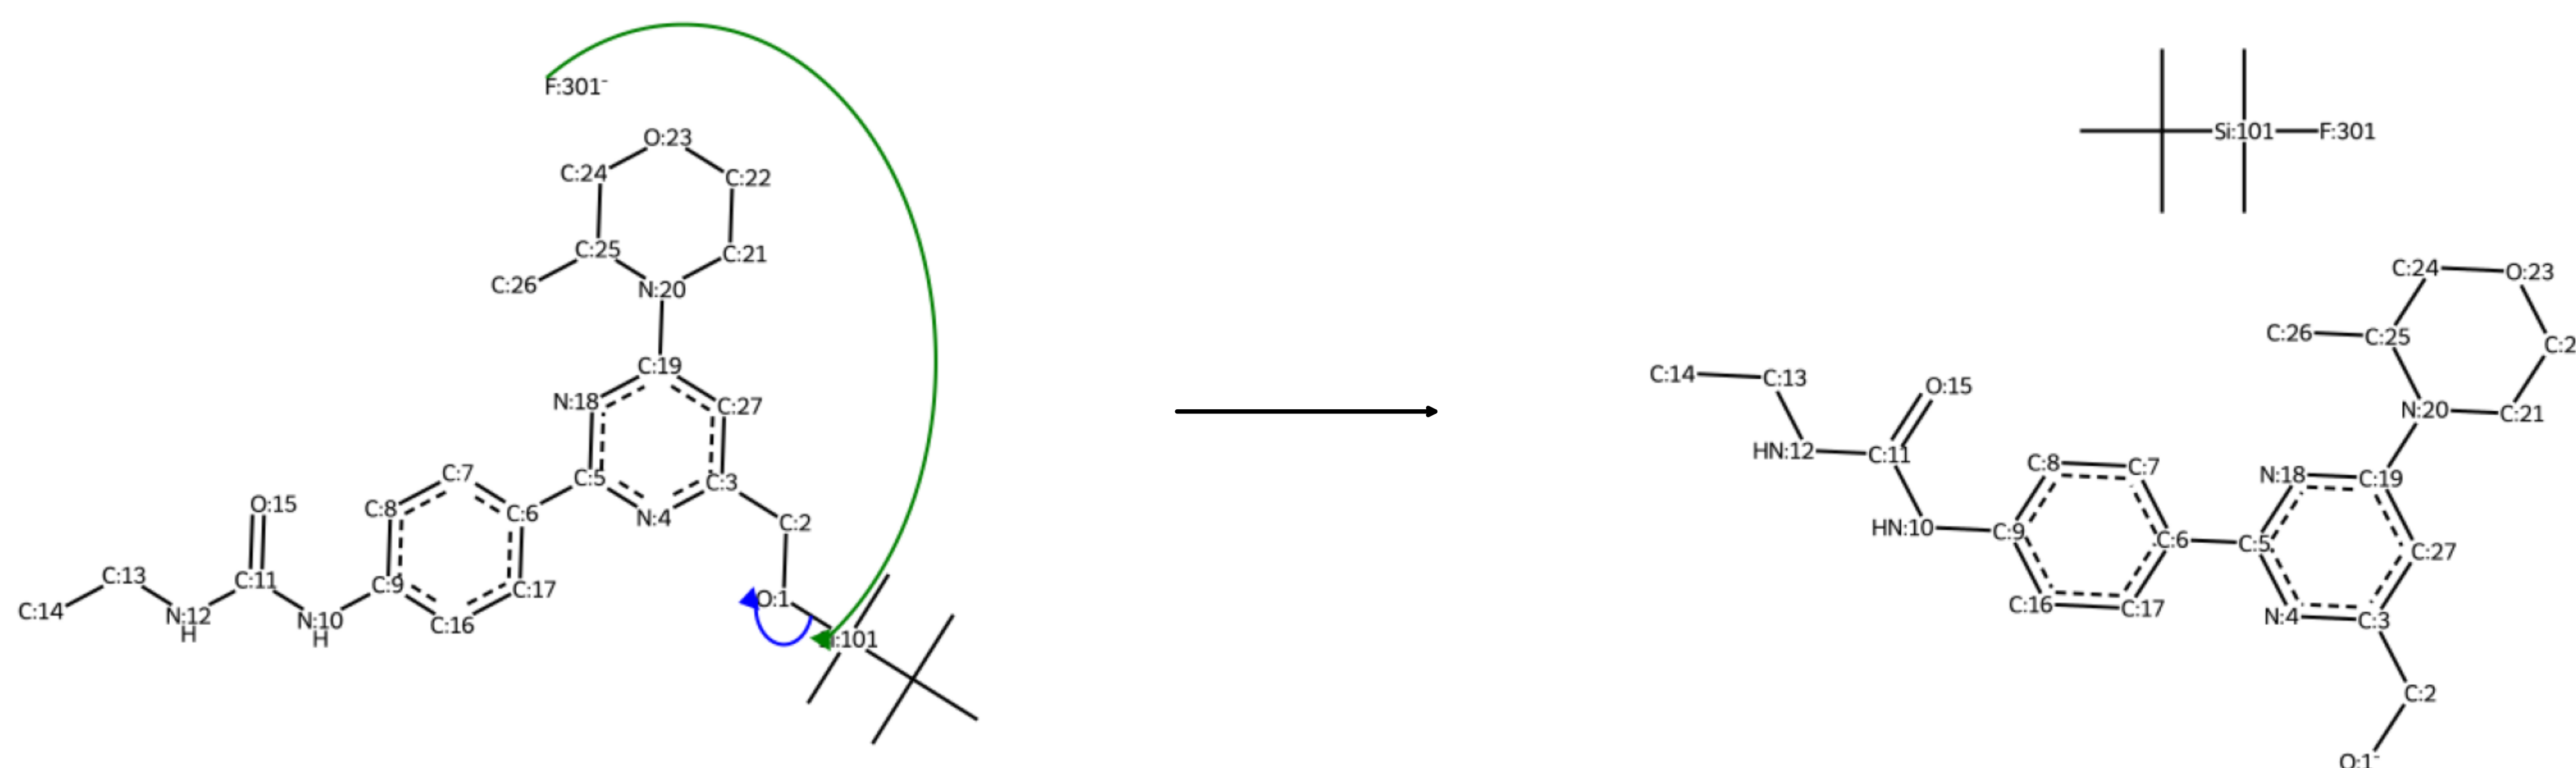



Original reaction  
sampled RXN\_ID:32)

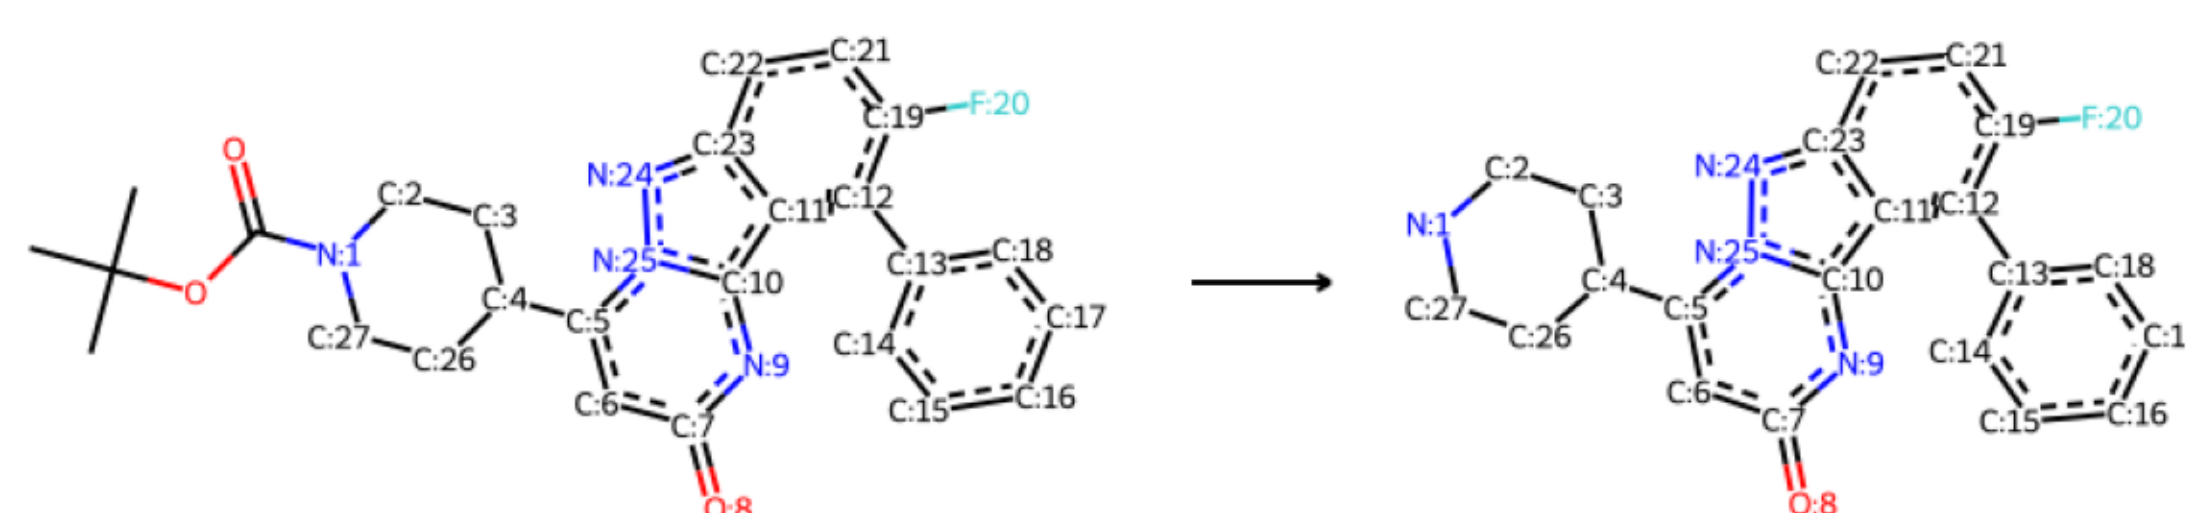

Identified mechanistic class -  
Boc\_deprotection reaction

Reaction with missing reagents recovered

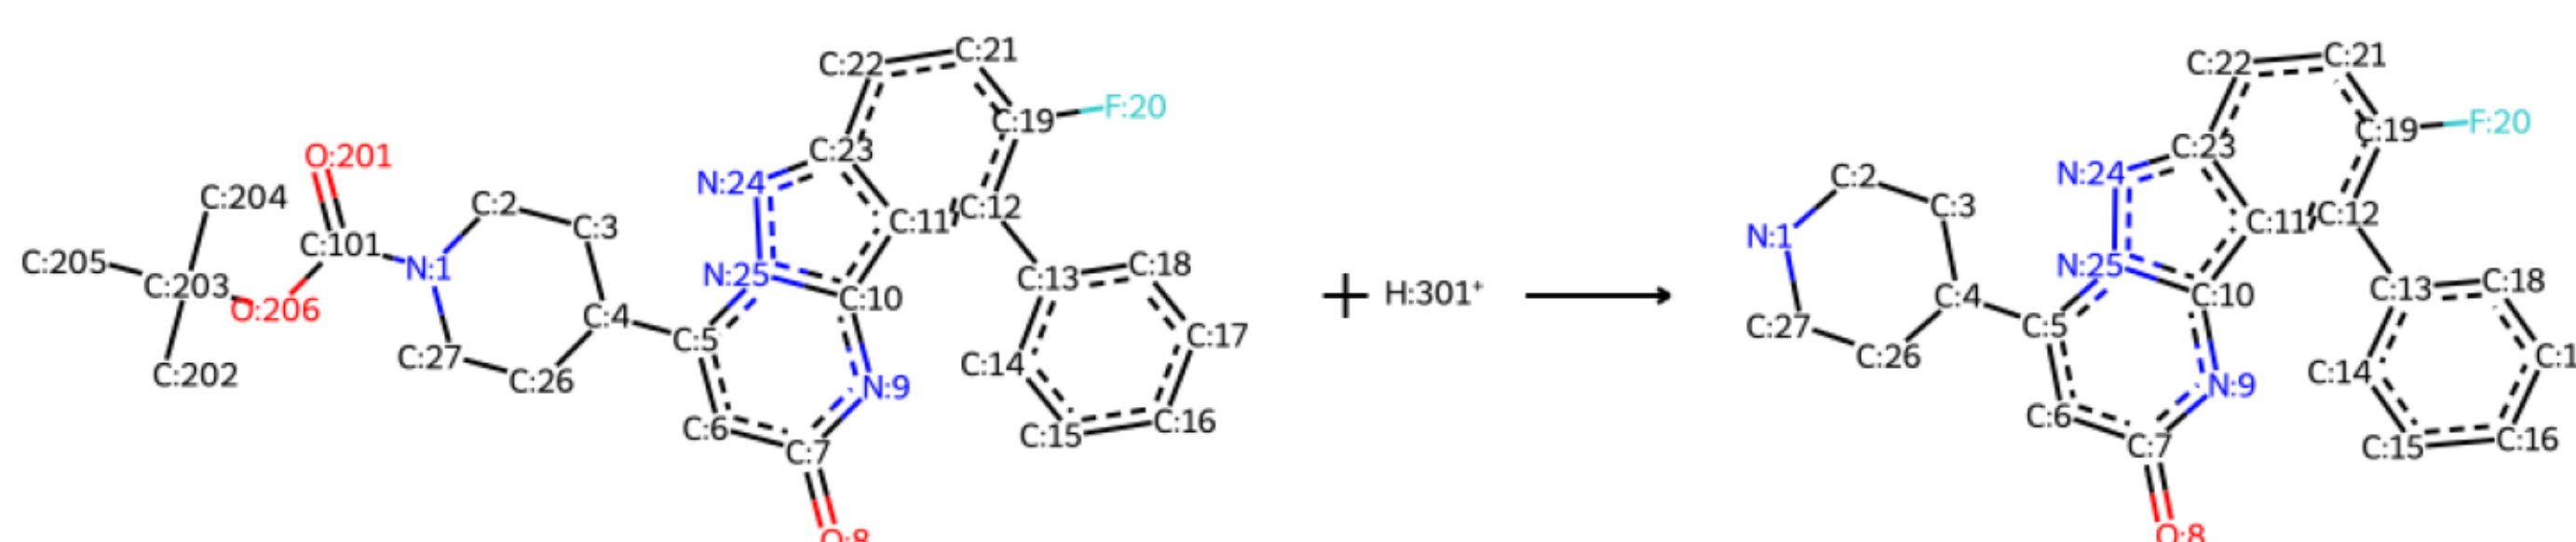

Proposed mechanistic pathway

[Arrow order: (1) green, (2) blue, (3) red, (4) orange]

step #1

step #2

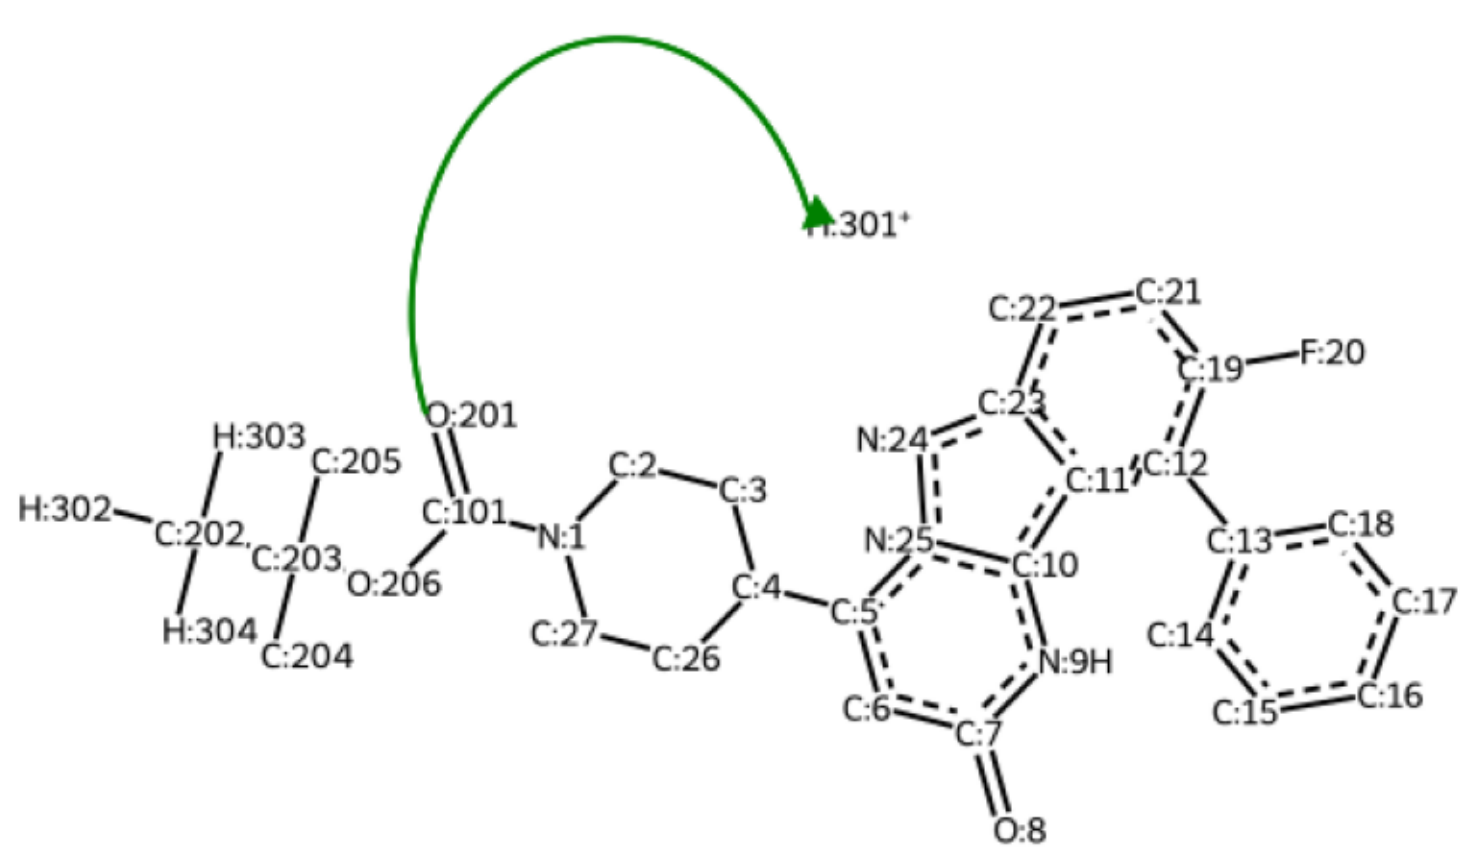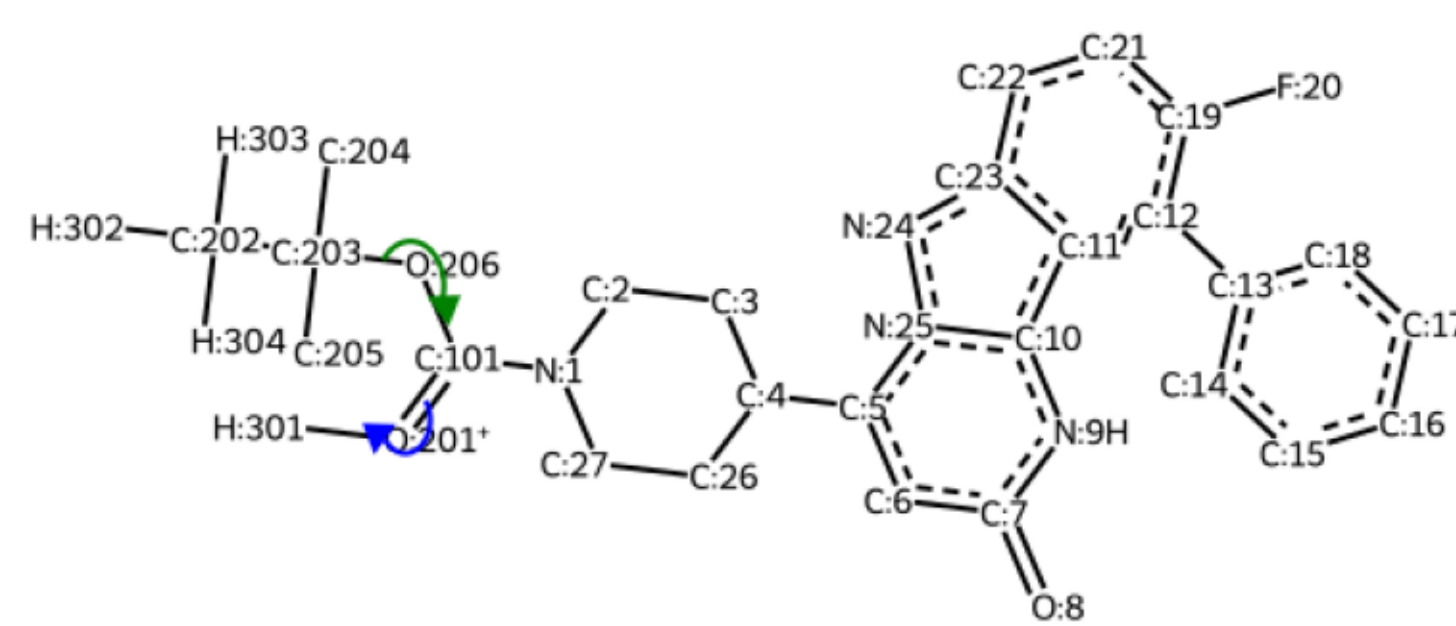

step #3

step #4

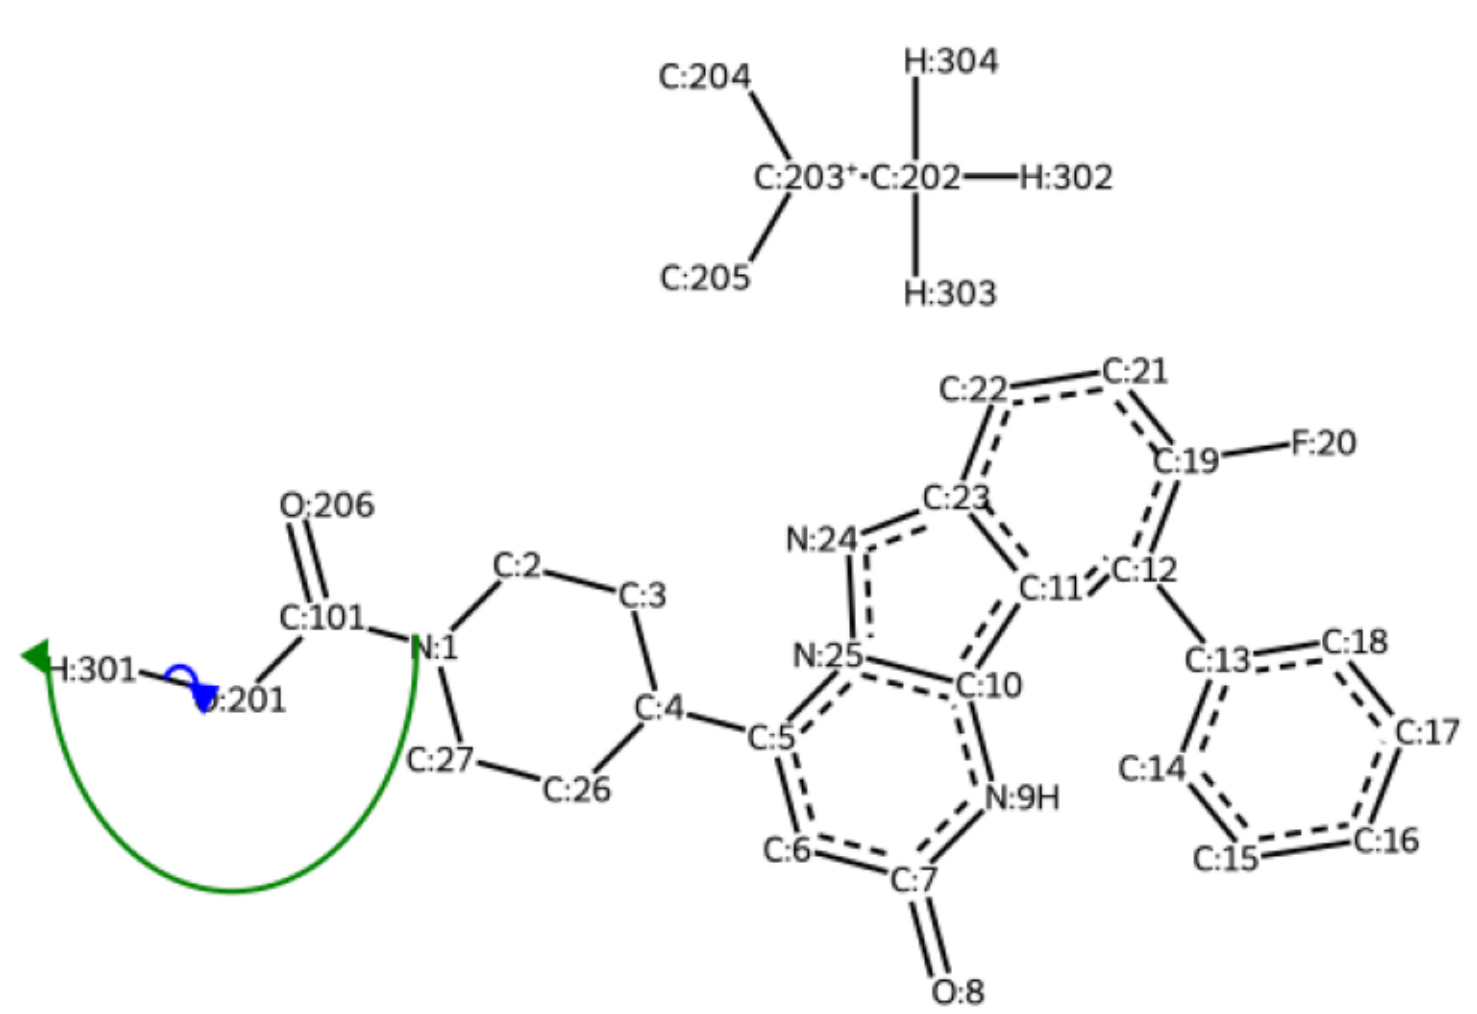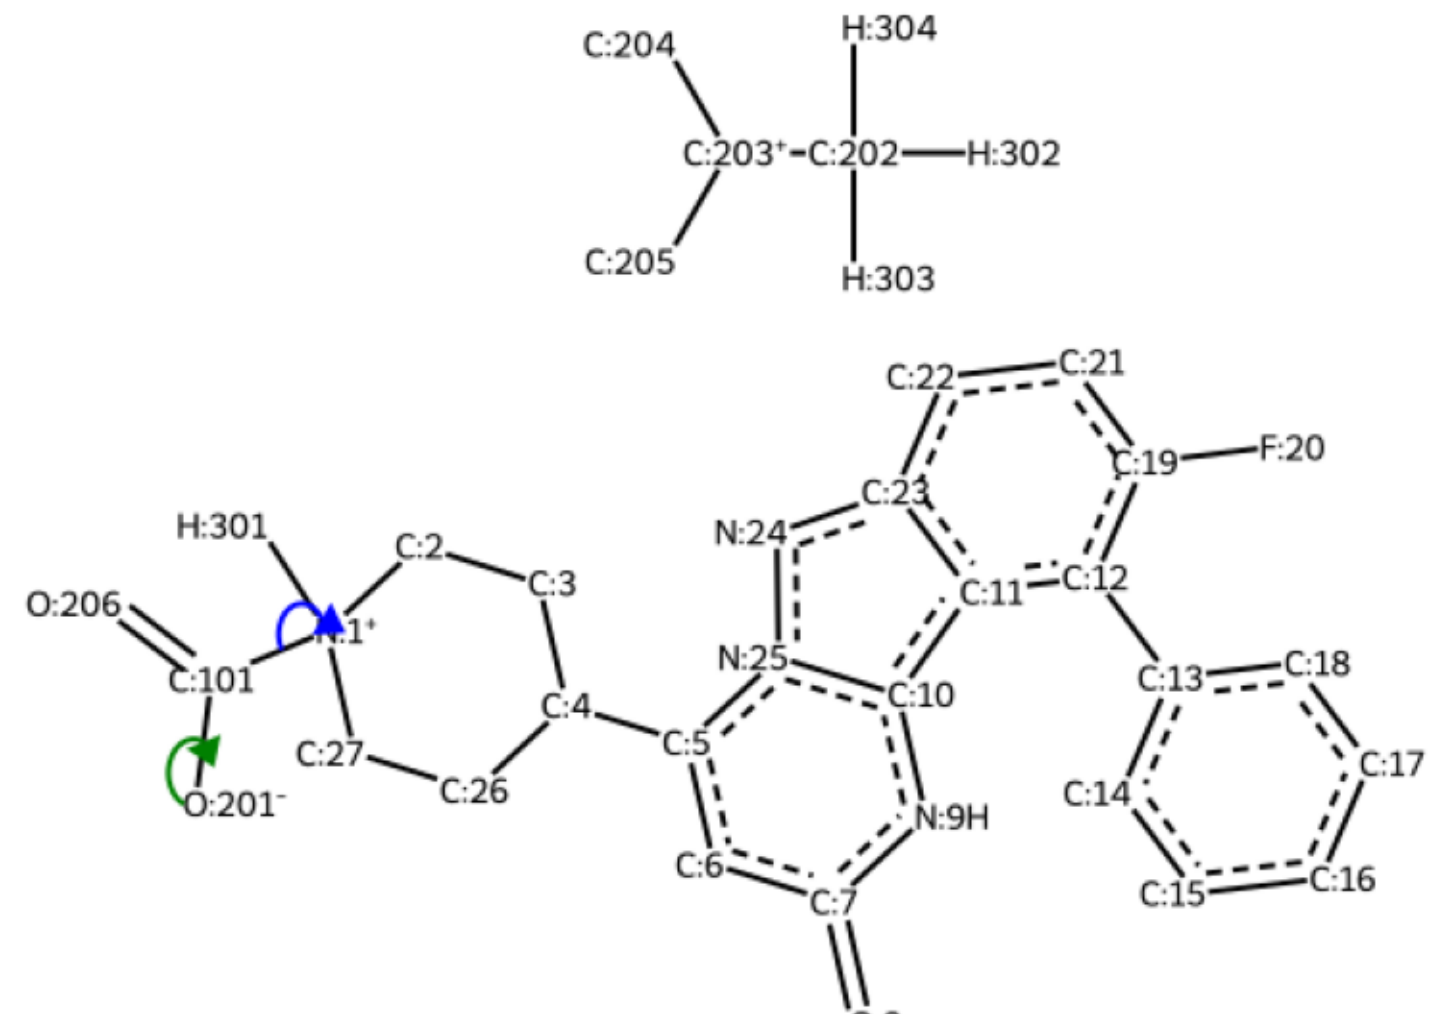

step #5

Product(s)

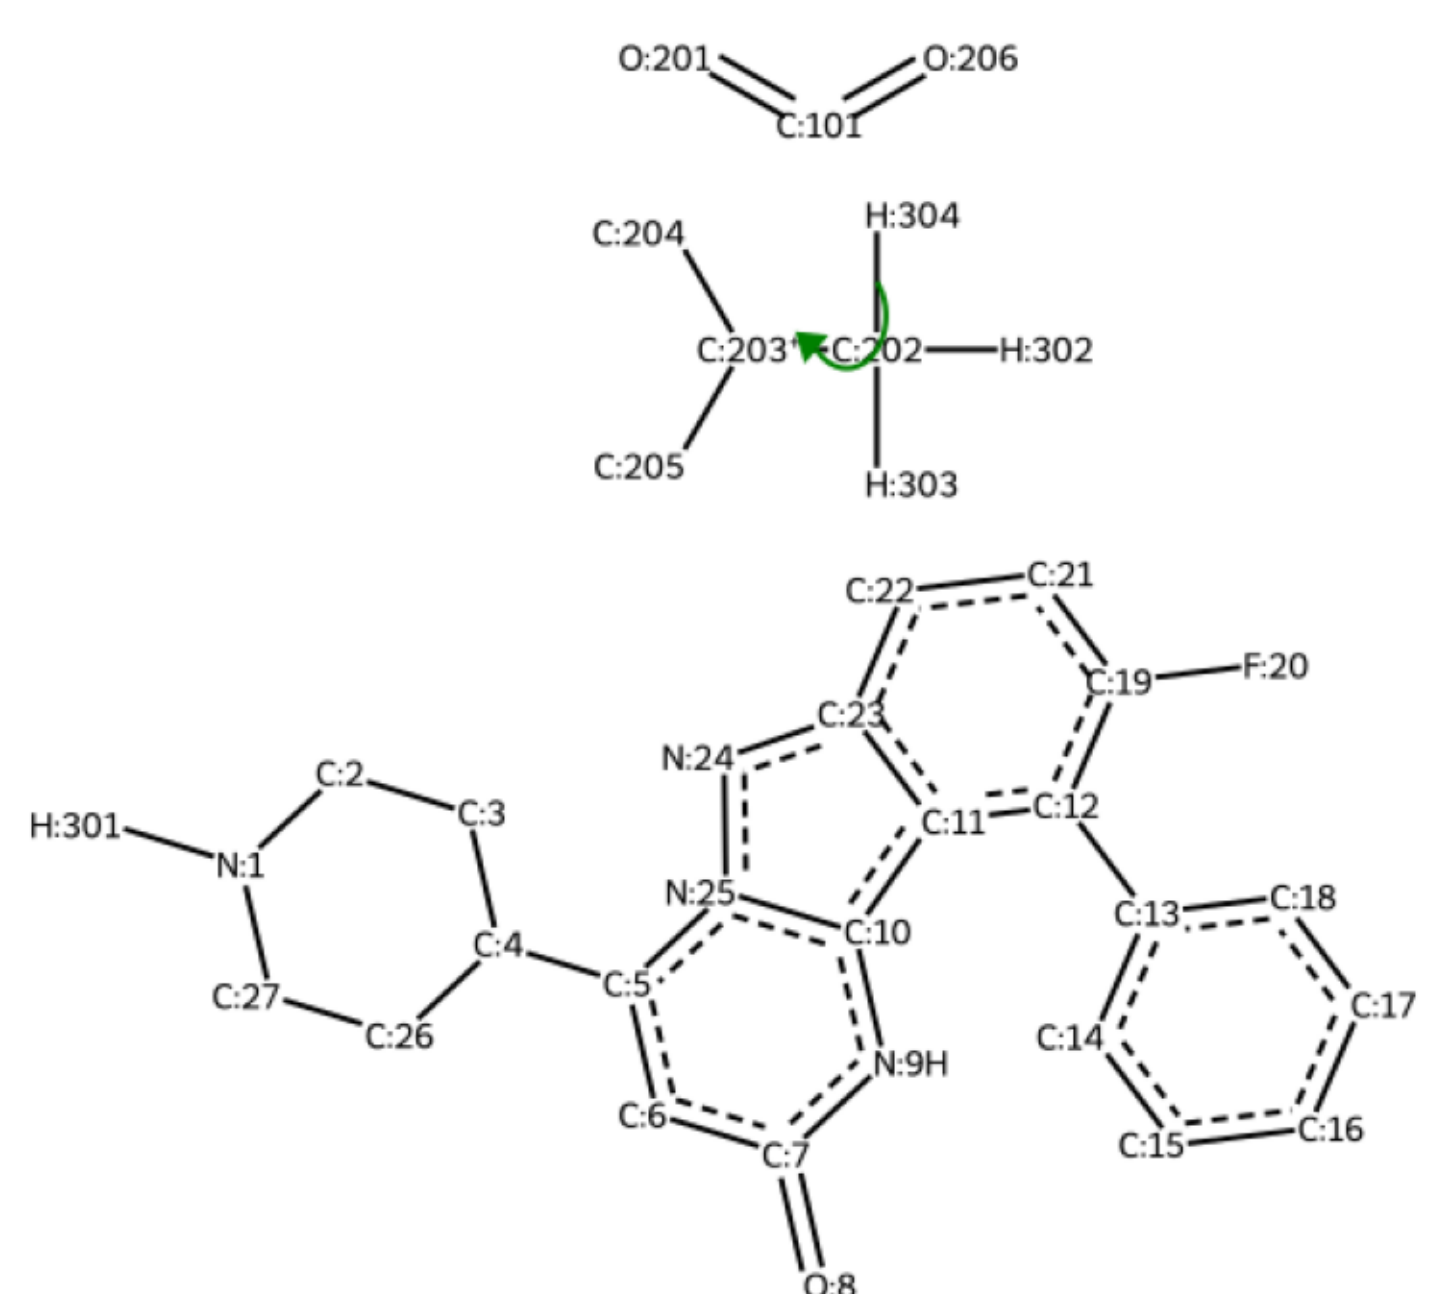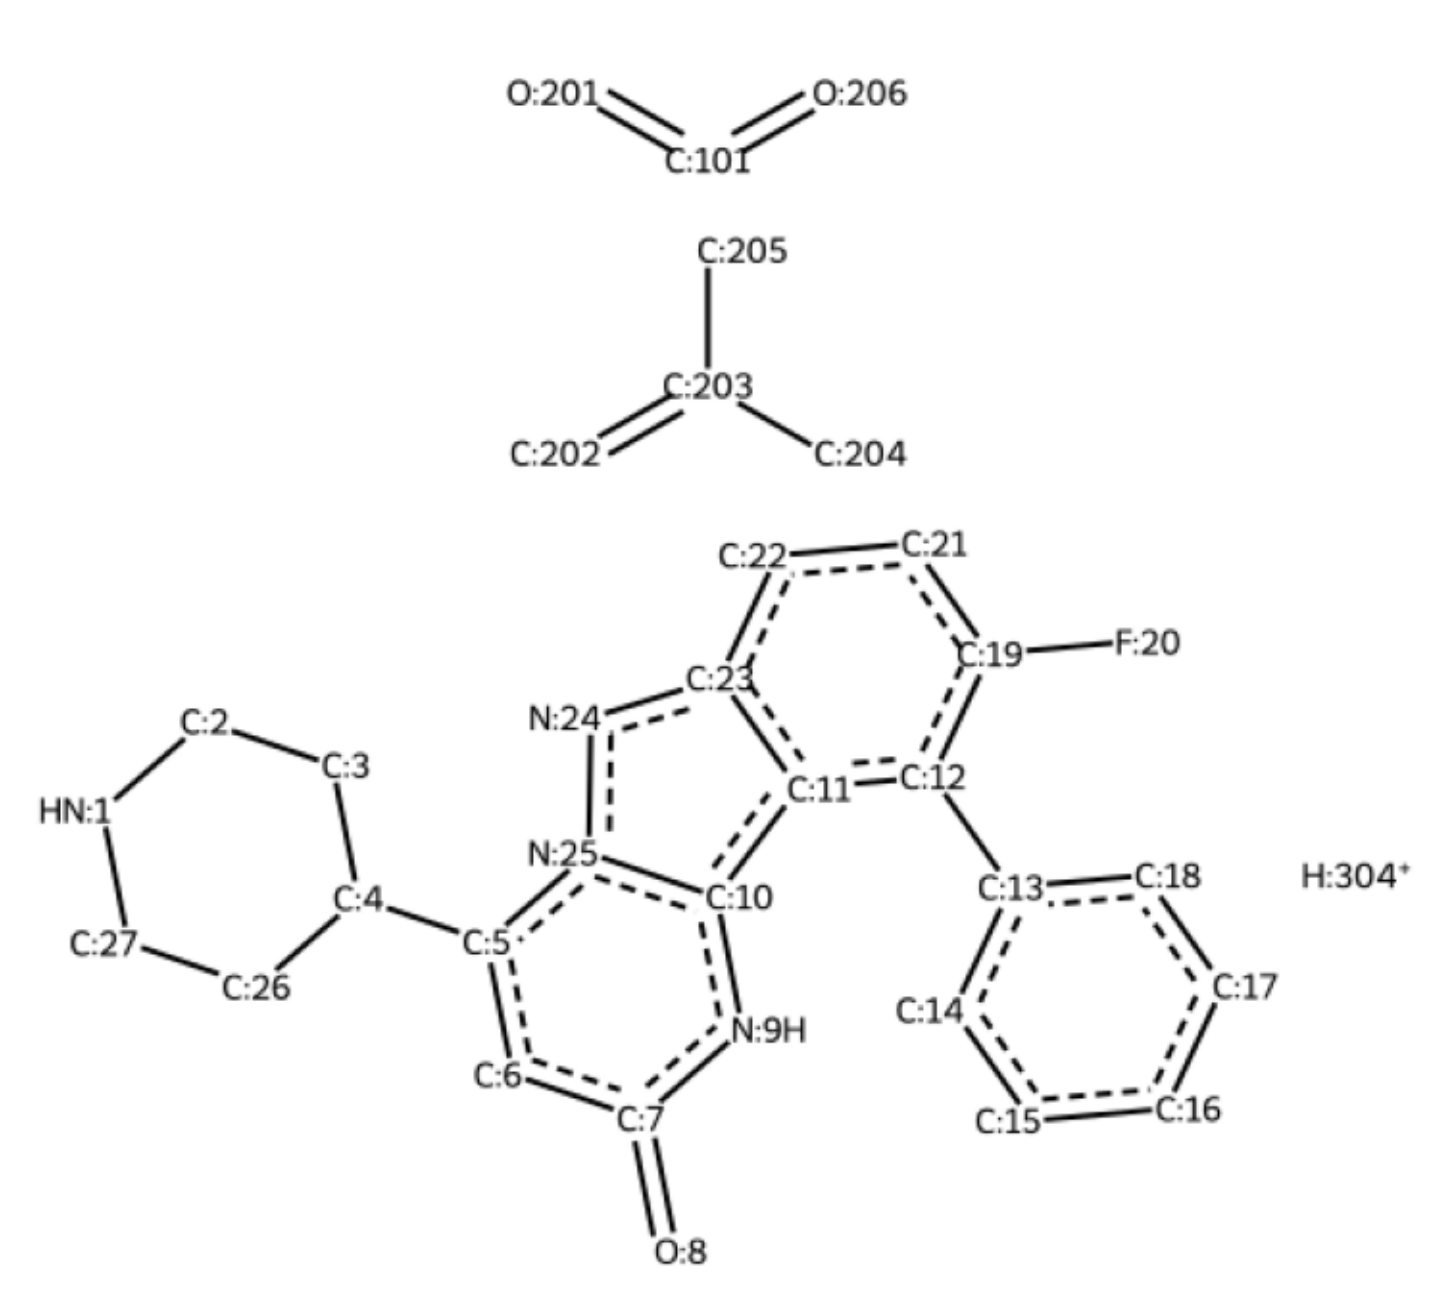



Original reaction  
sampled RXN\_ID:33)

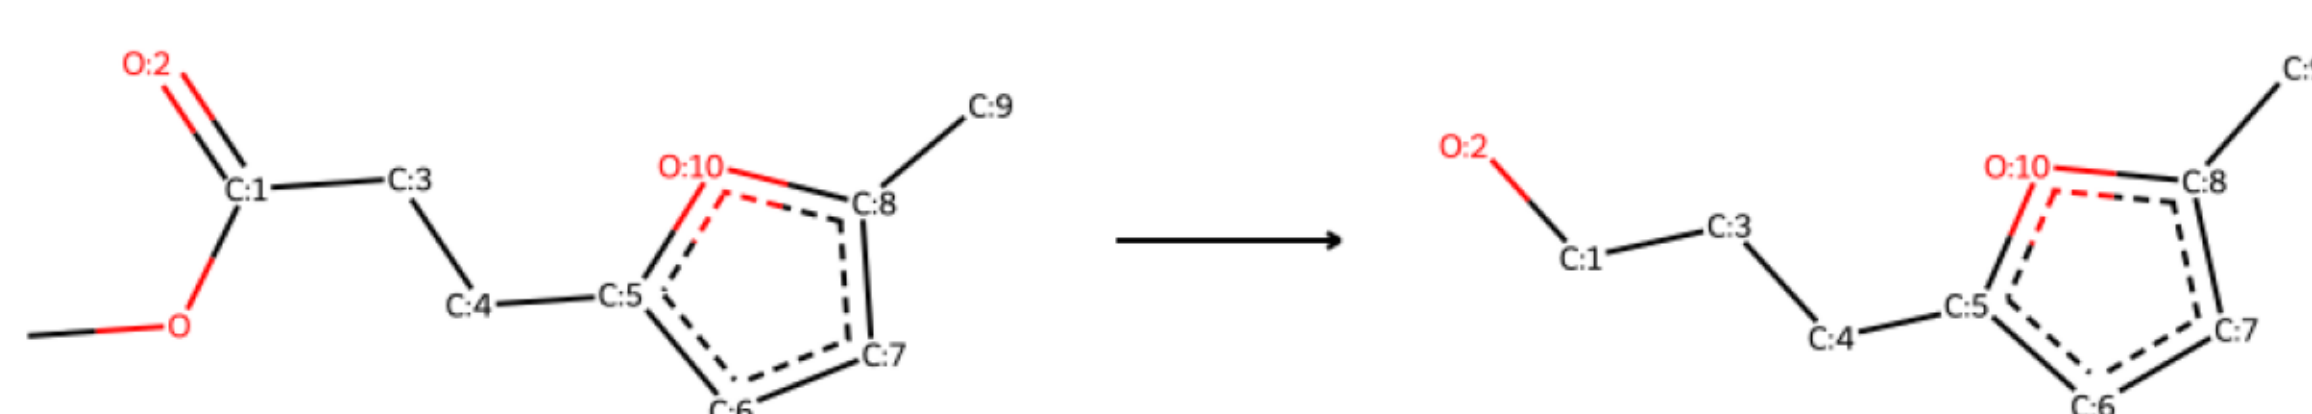

Identified mechanistic class -  
ester\_reduction reaction

Reaction with missing reagents recovered

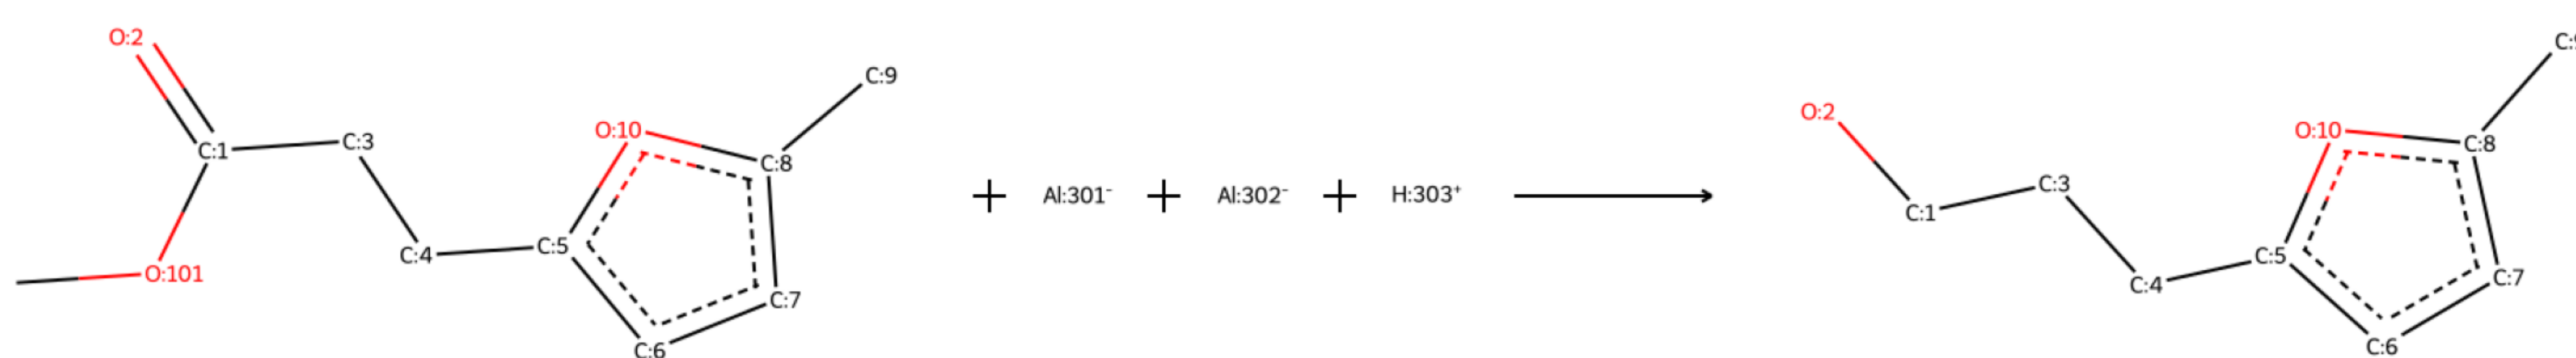

Proposed mechanistic pathway

[Arrow order: (1) green, (2) blue, (3) red, (4) orange]

step #1

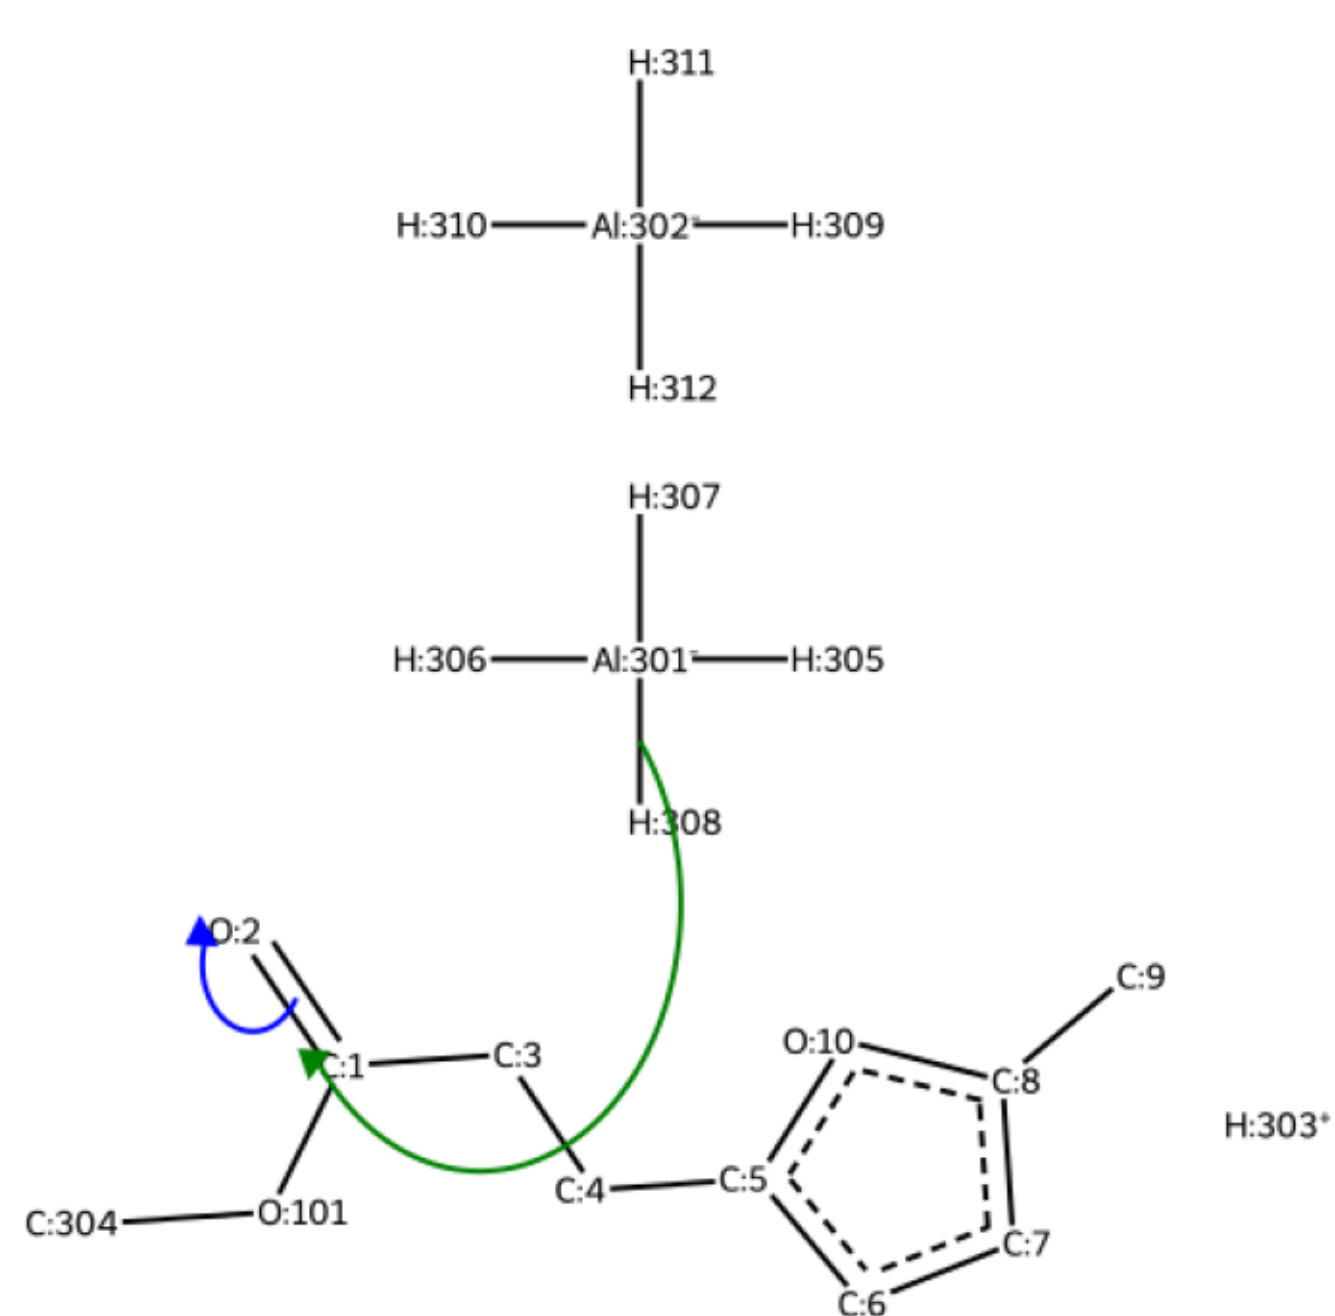

step #2

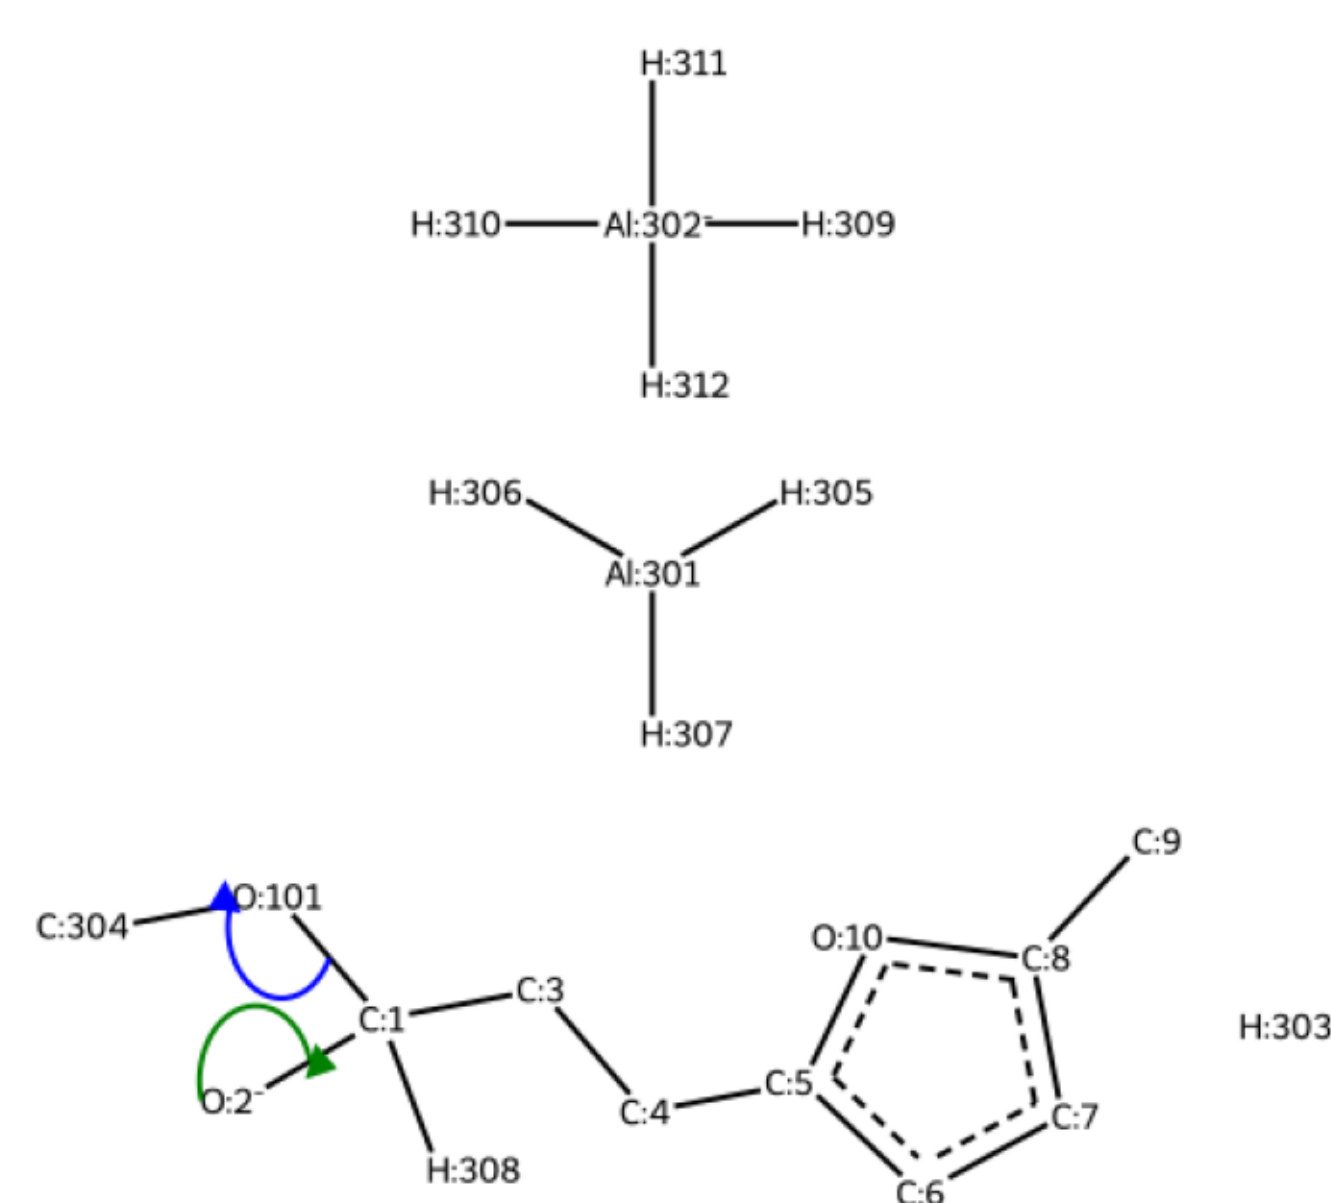

step #3

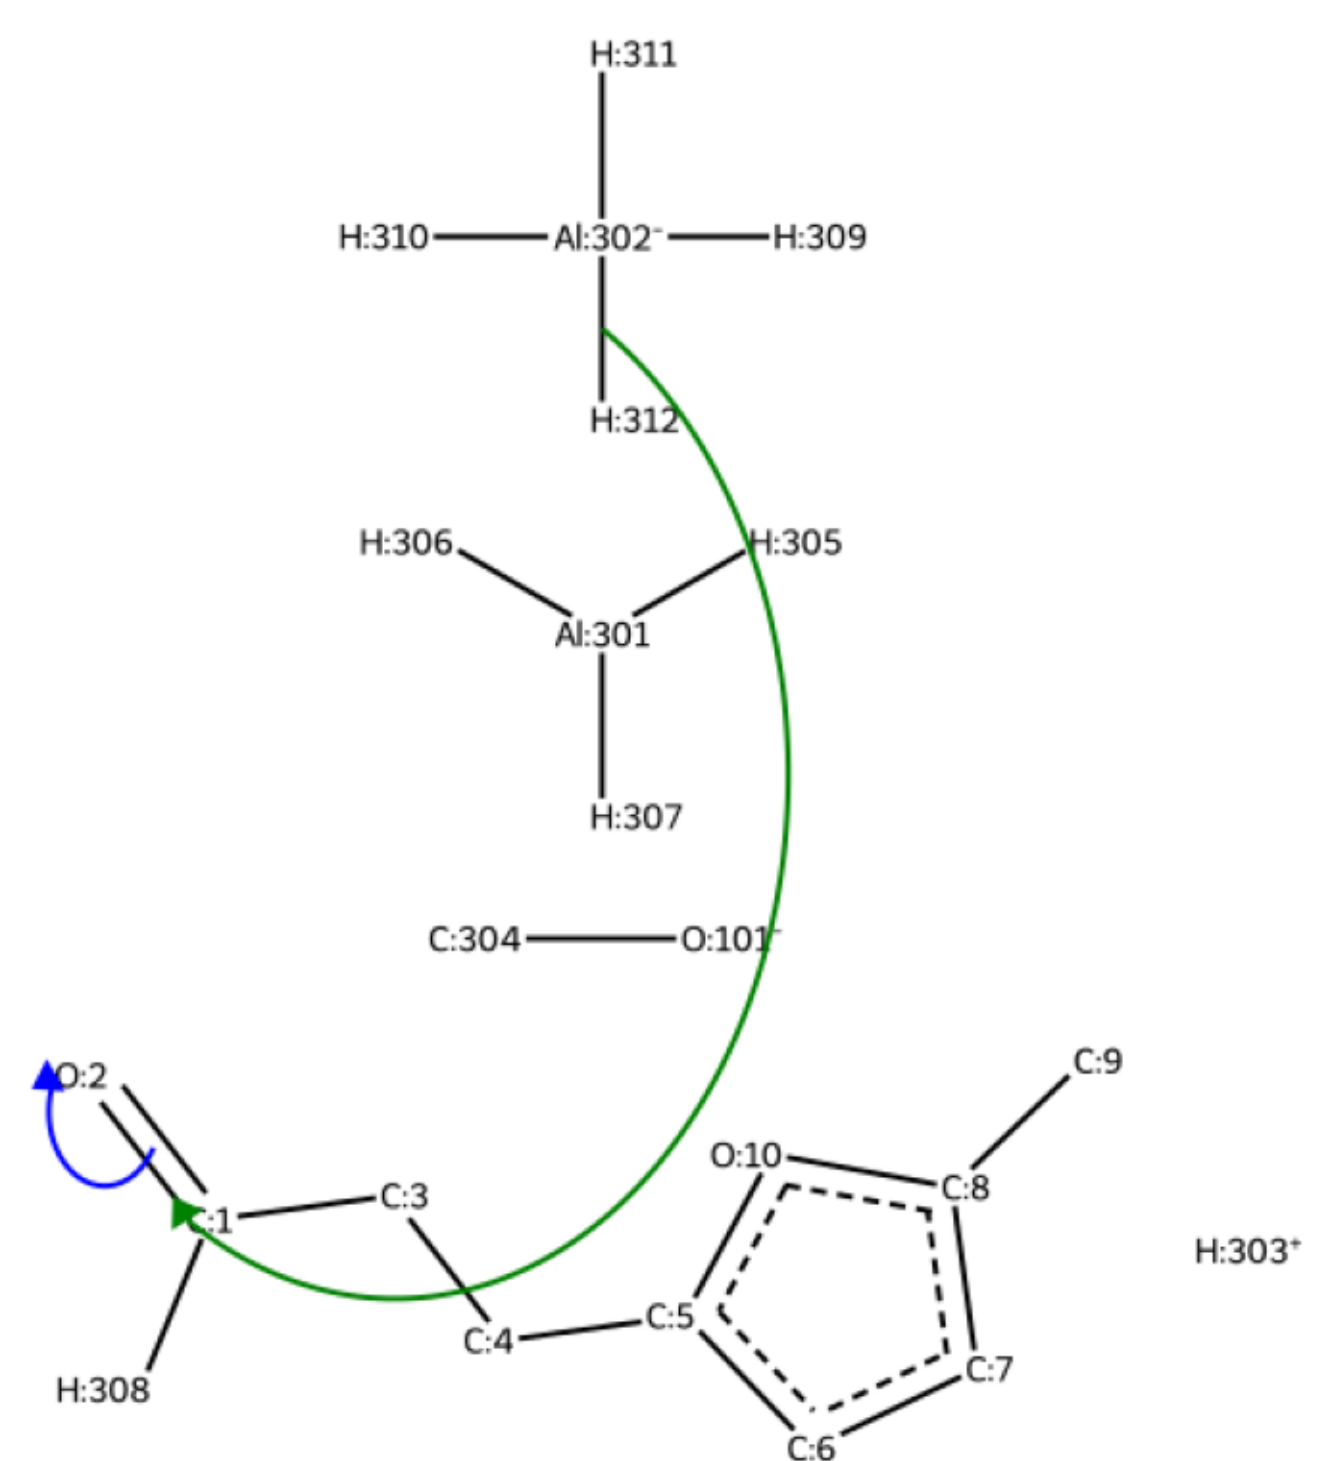

step #4

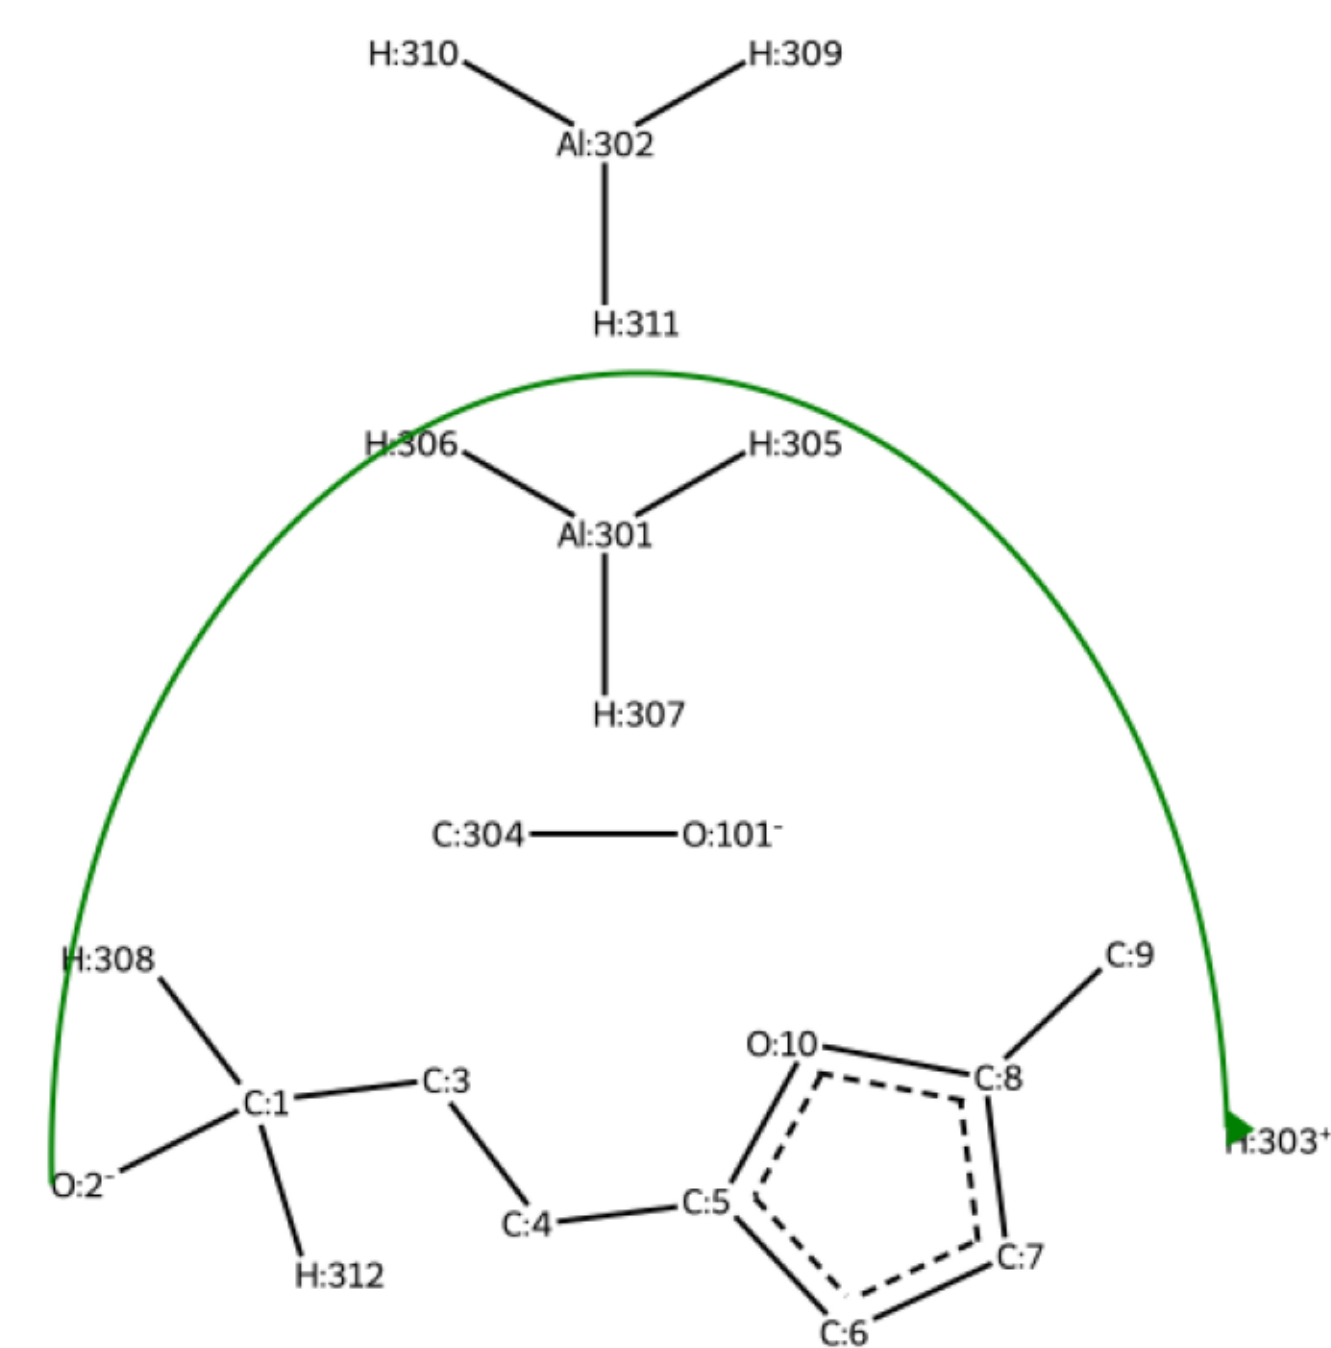

Product(s)

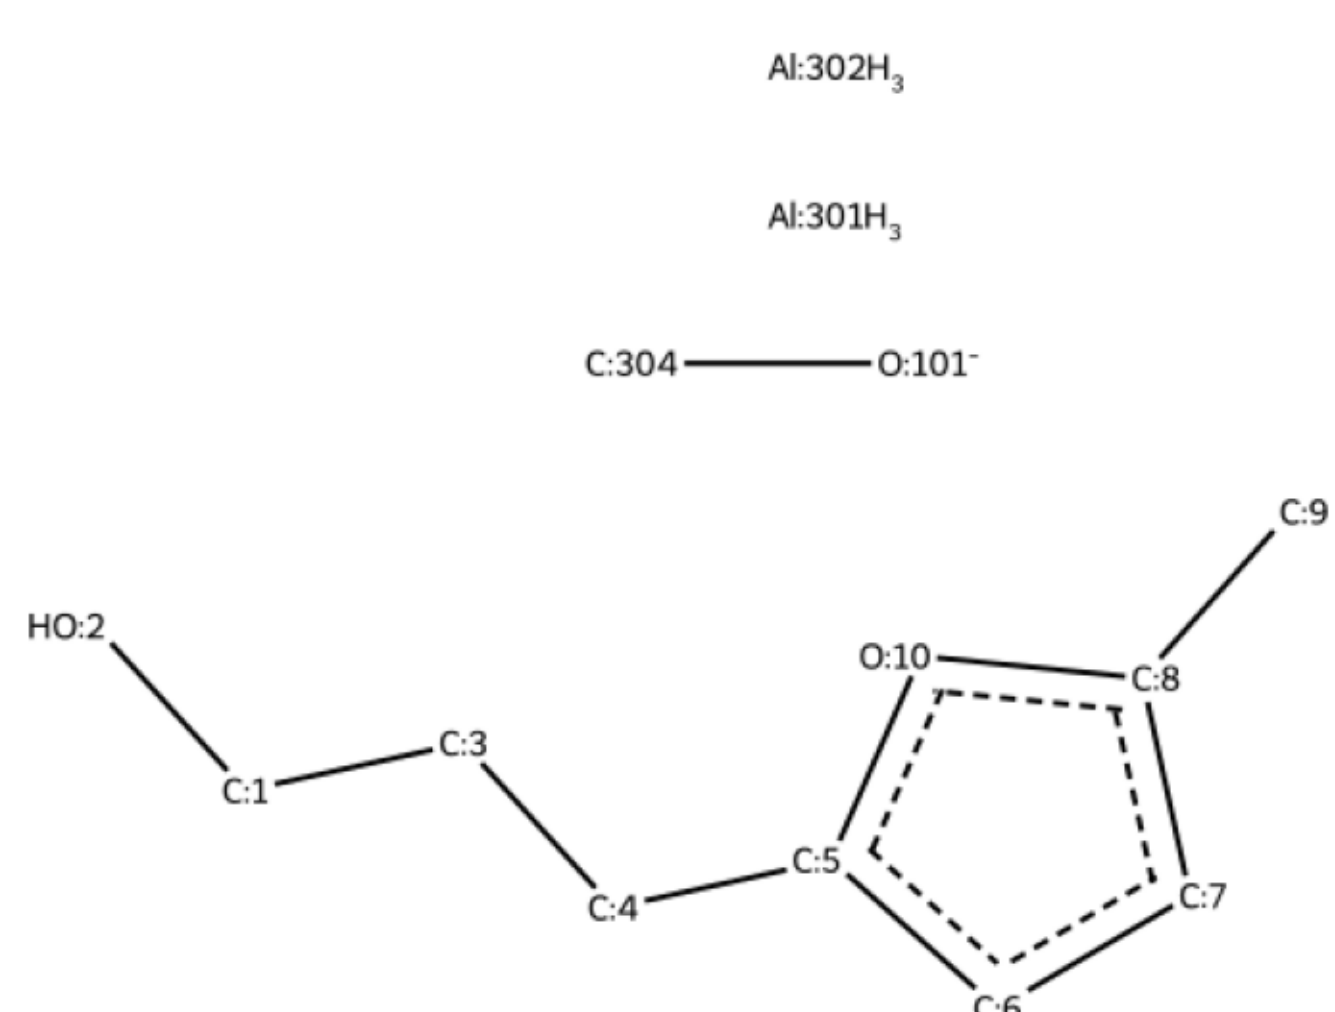



Original reaction  
sampled RXN\_ID:34)

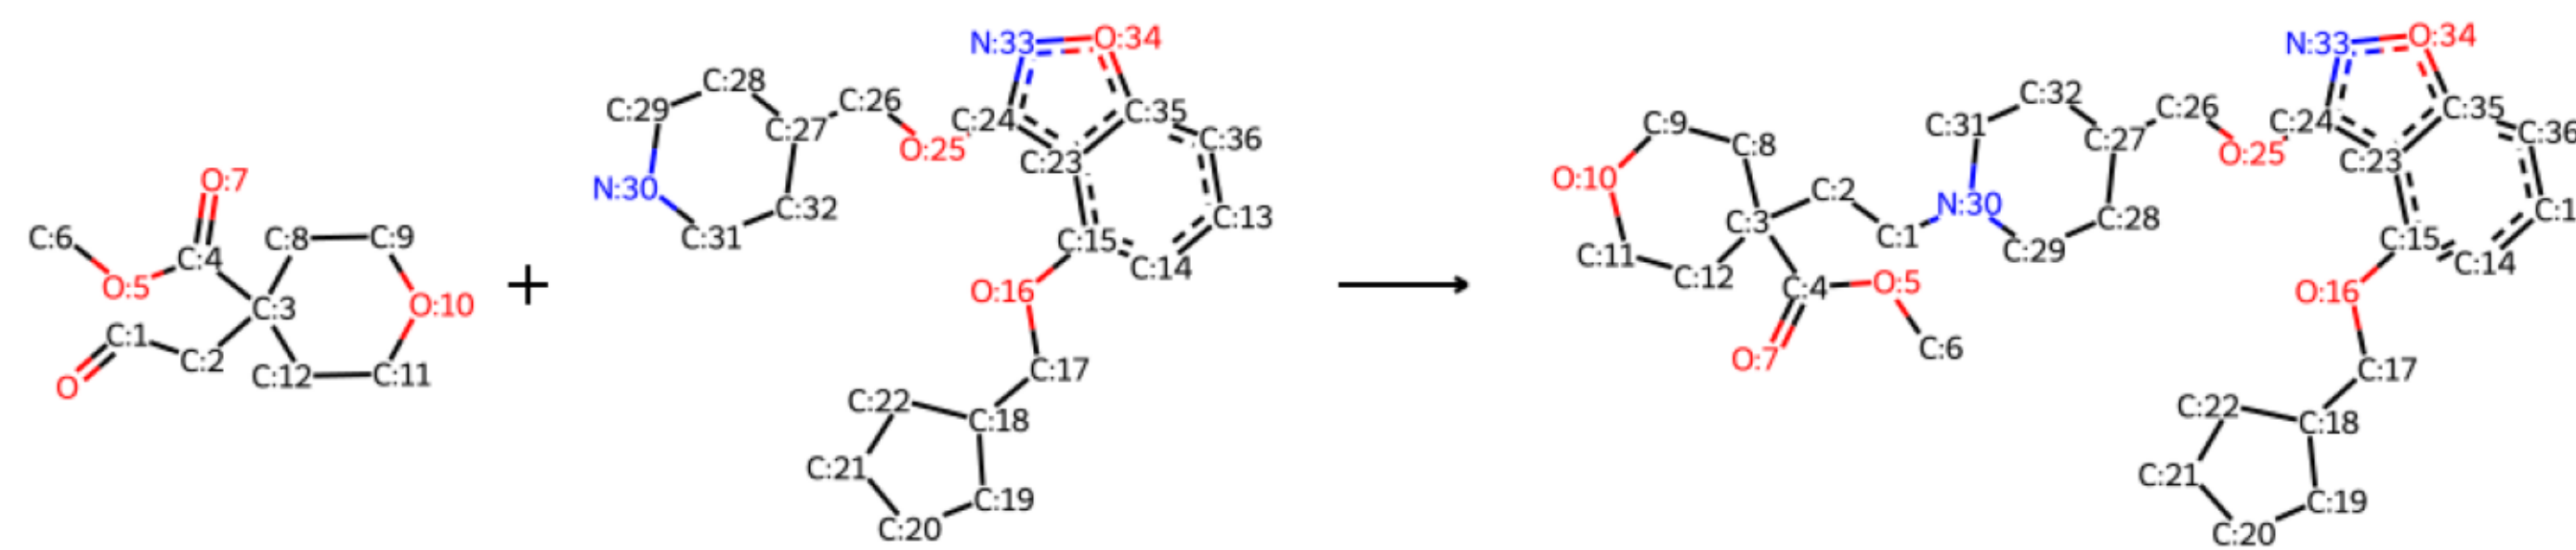

Identified mechanistic class -  
reductive\_amination reaction

Reaction with missing reagents recovered

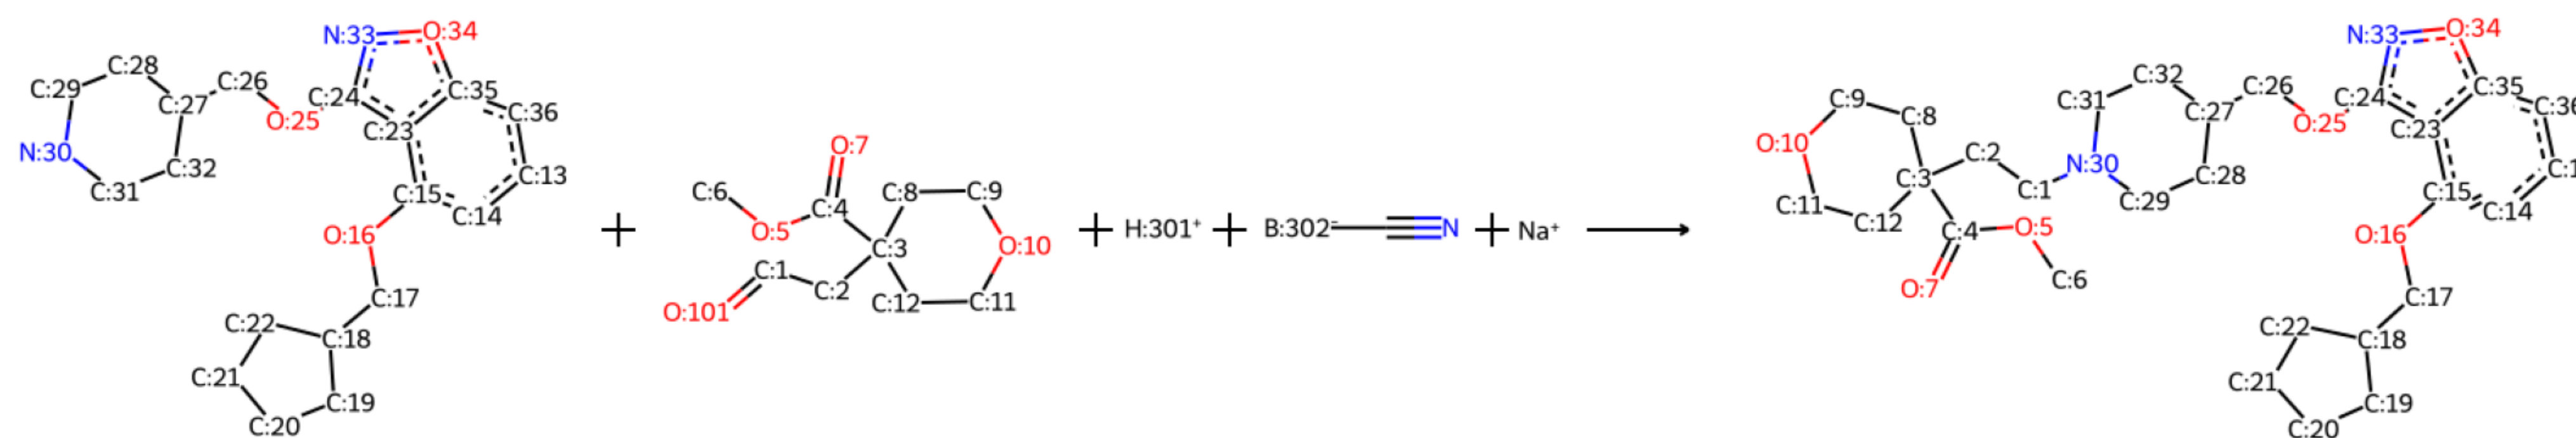

Proposed mechanistic pathway

[Arrow order: (1) green, (2) blue, (3) red, (4) orange]

step #1

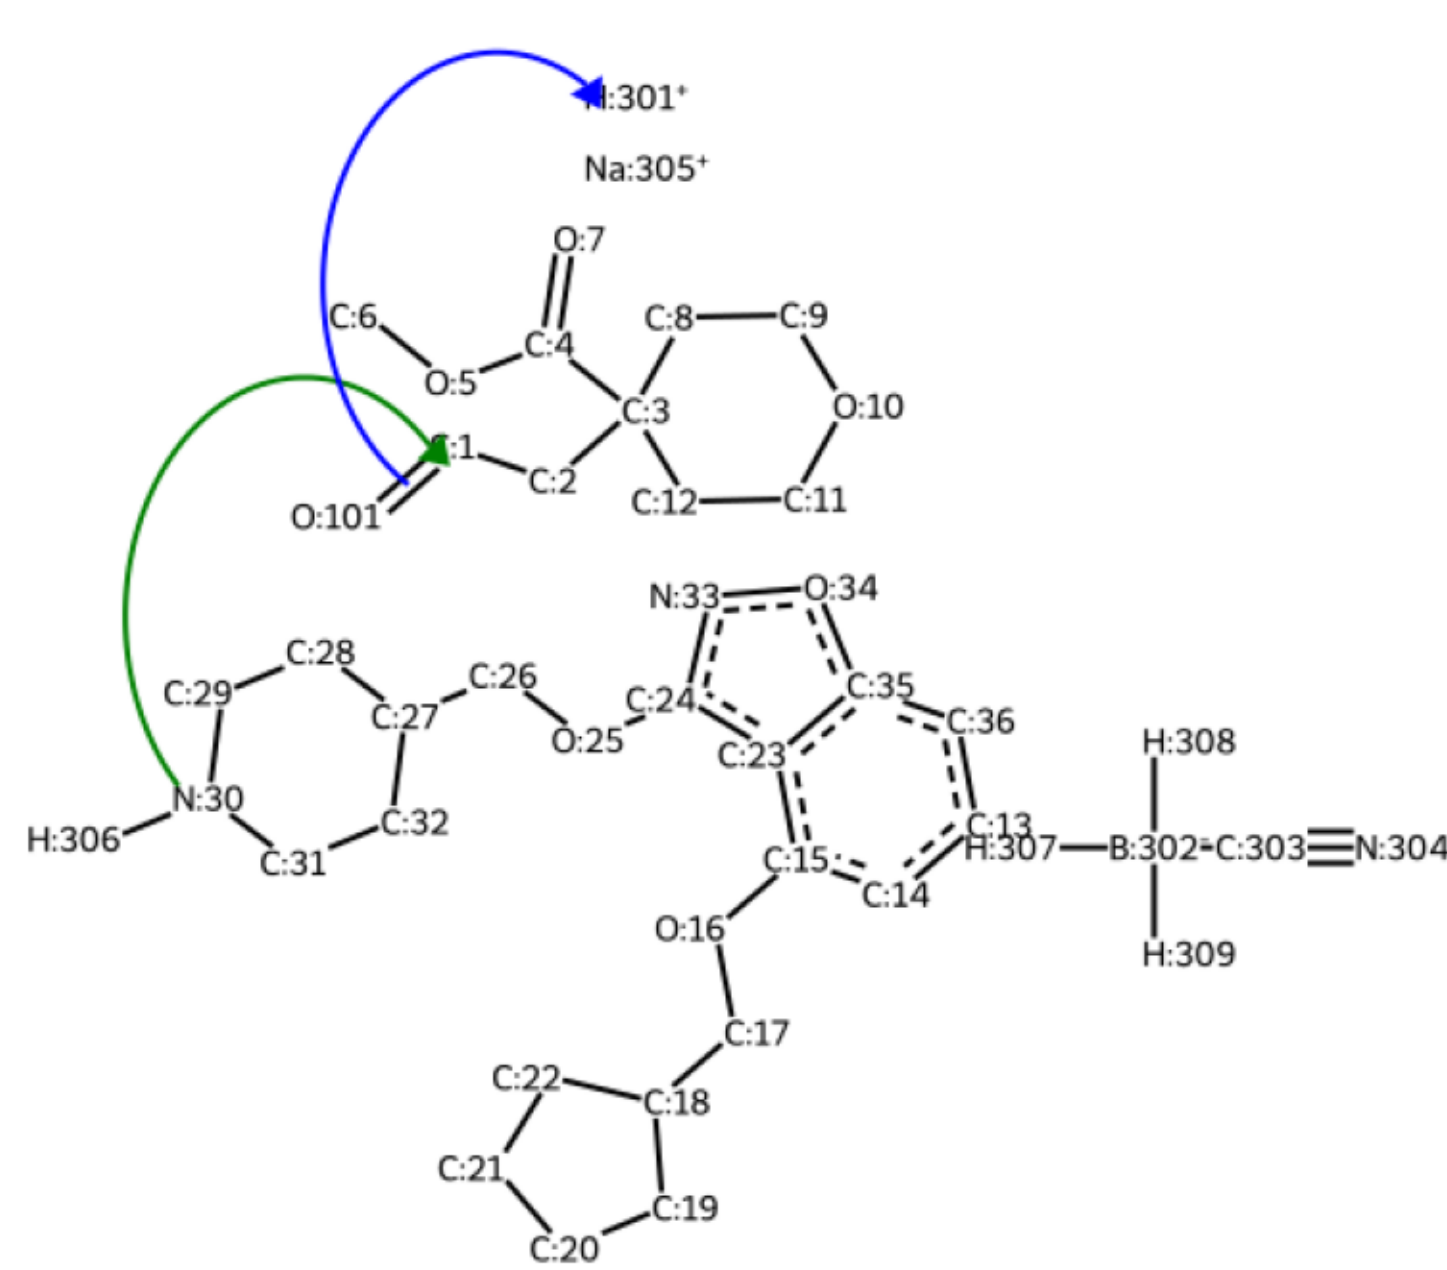

step #2

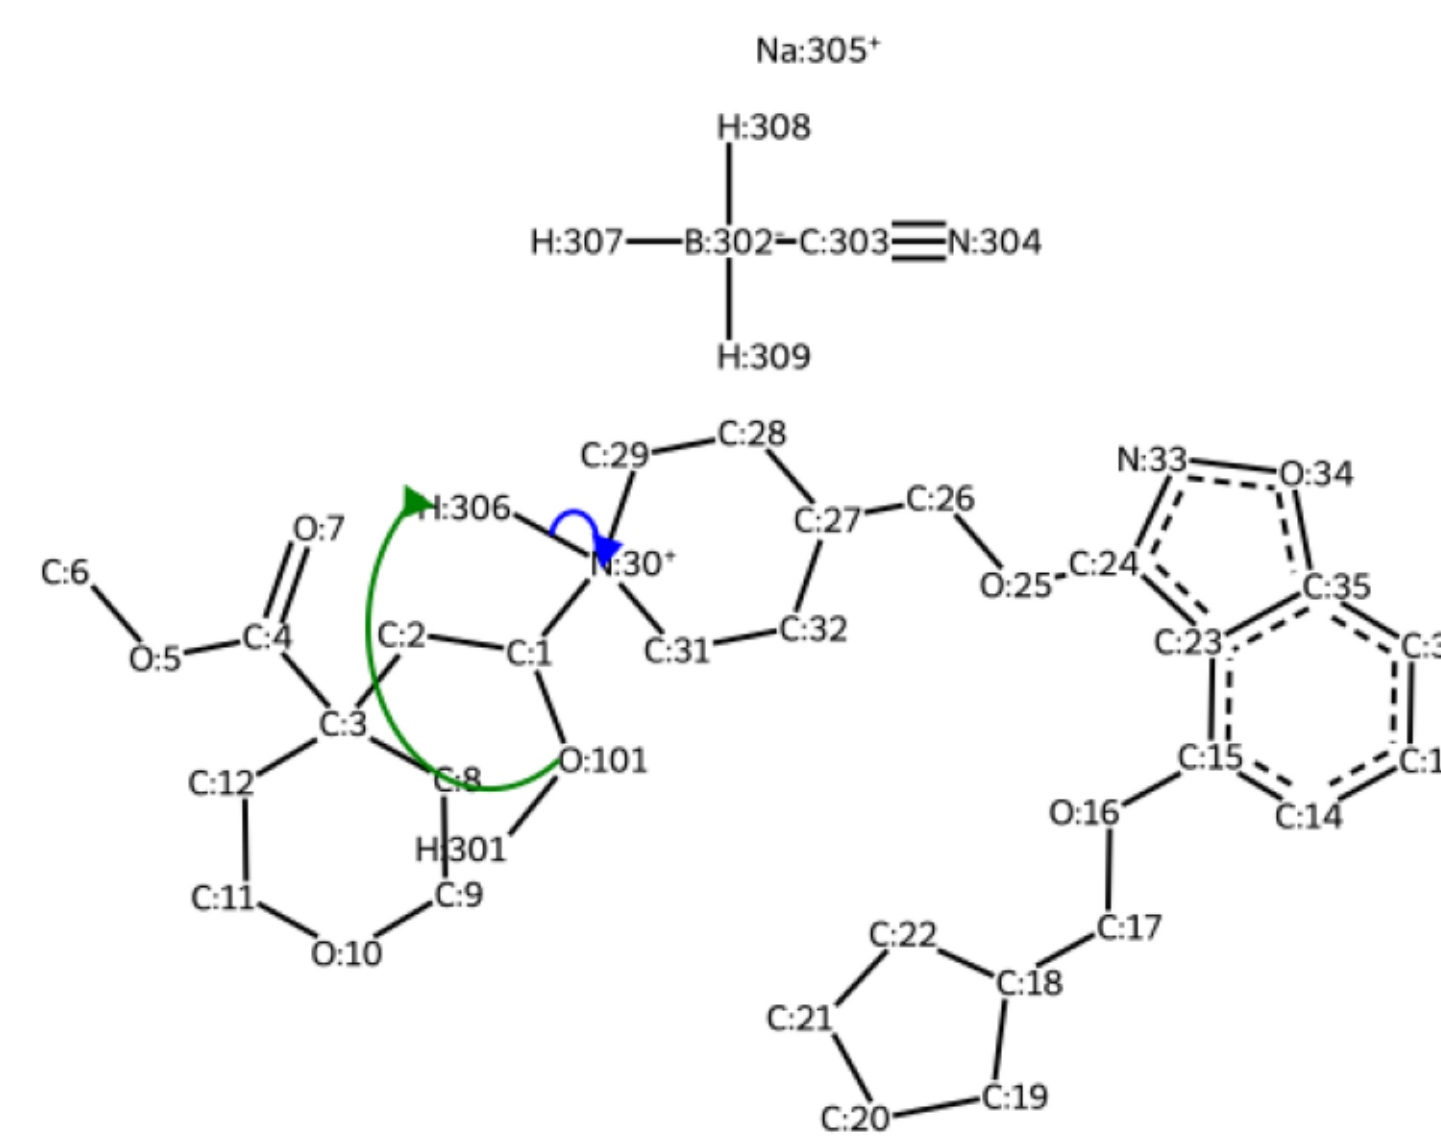

step #3

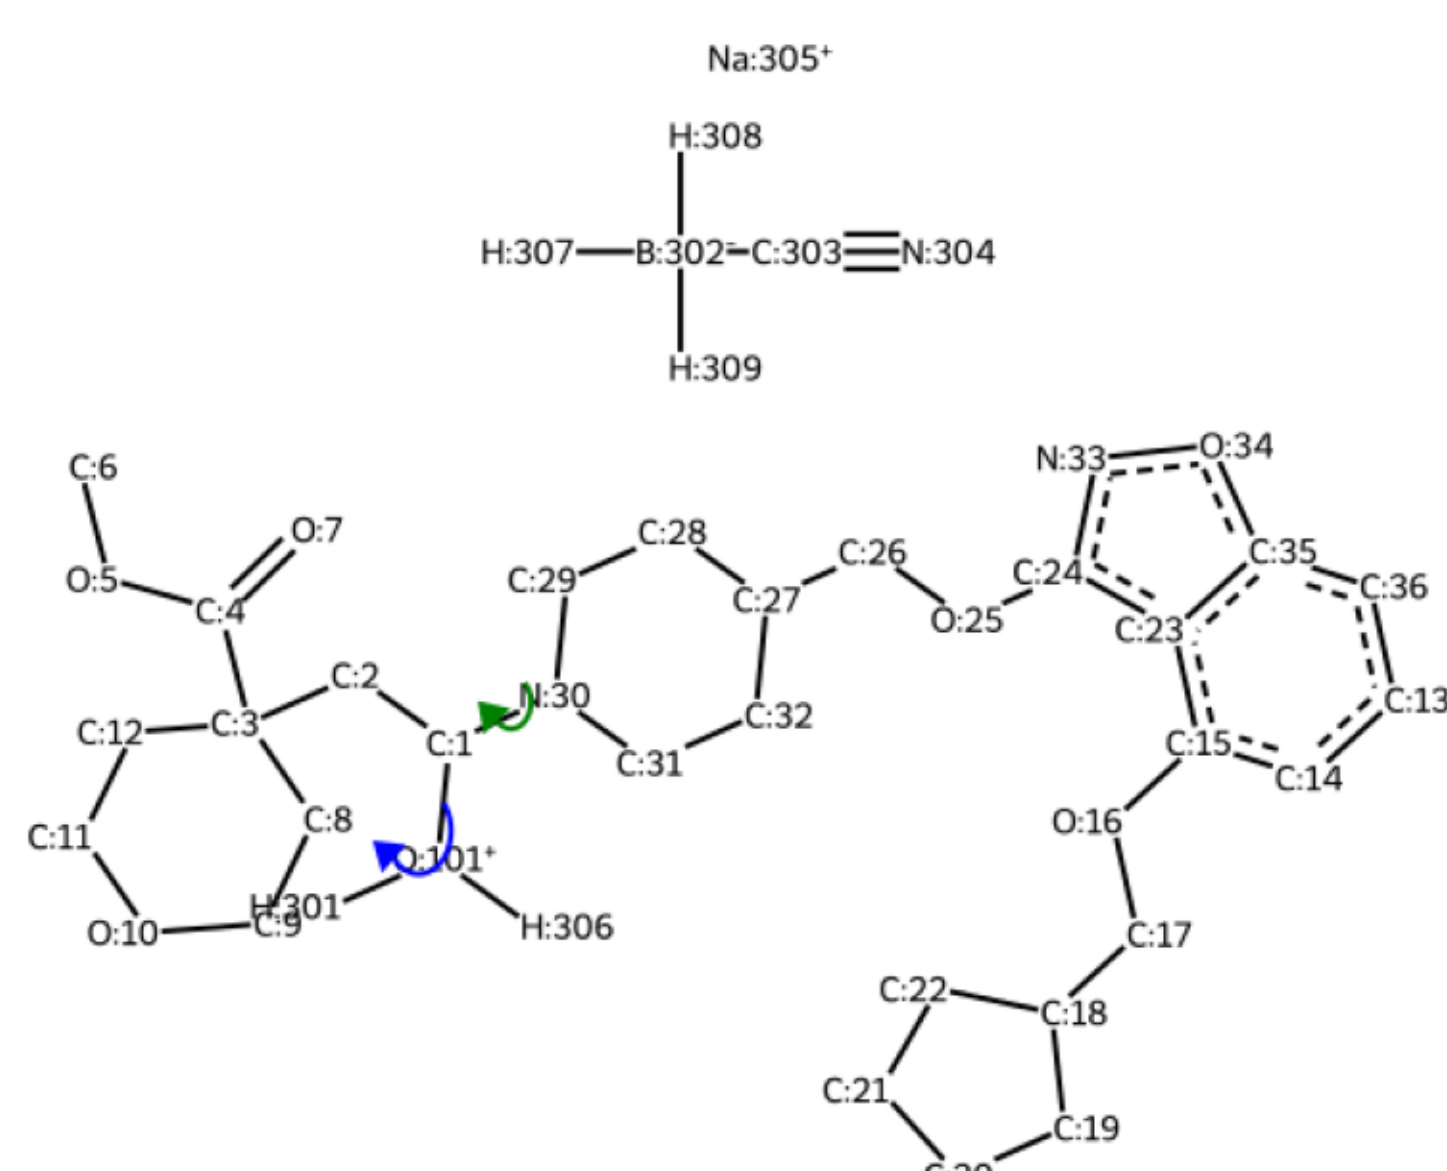

step #4

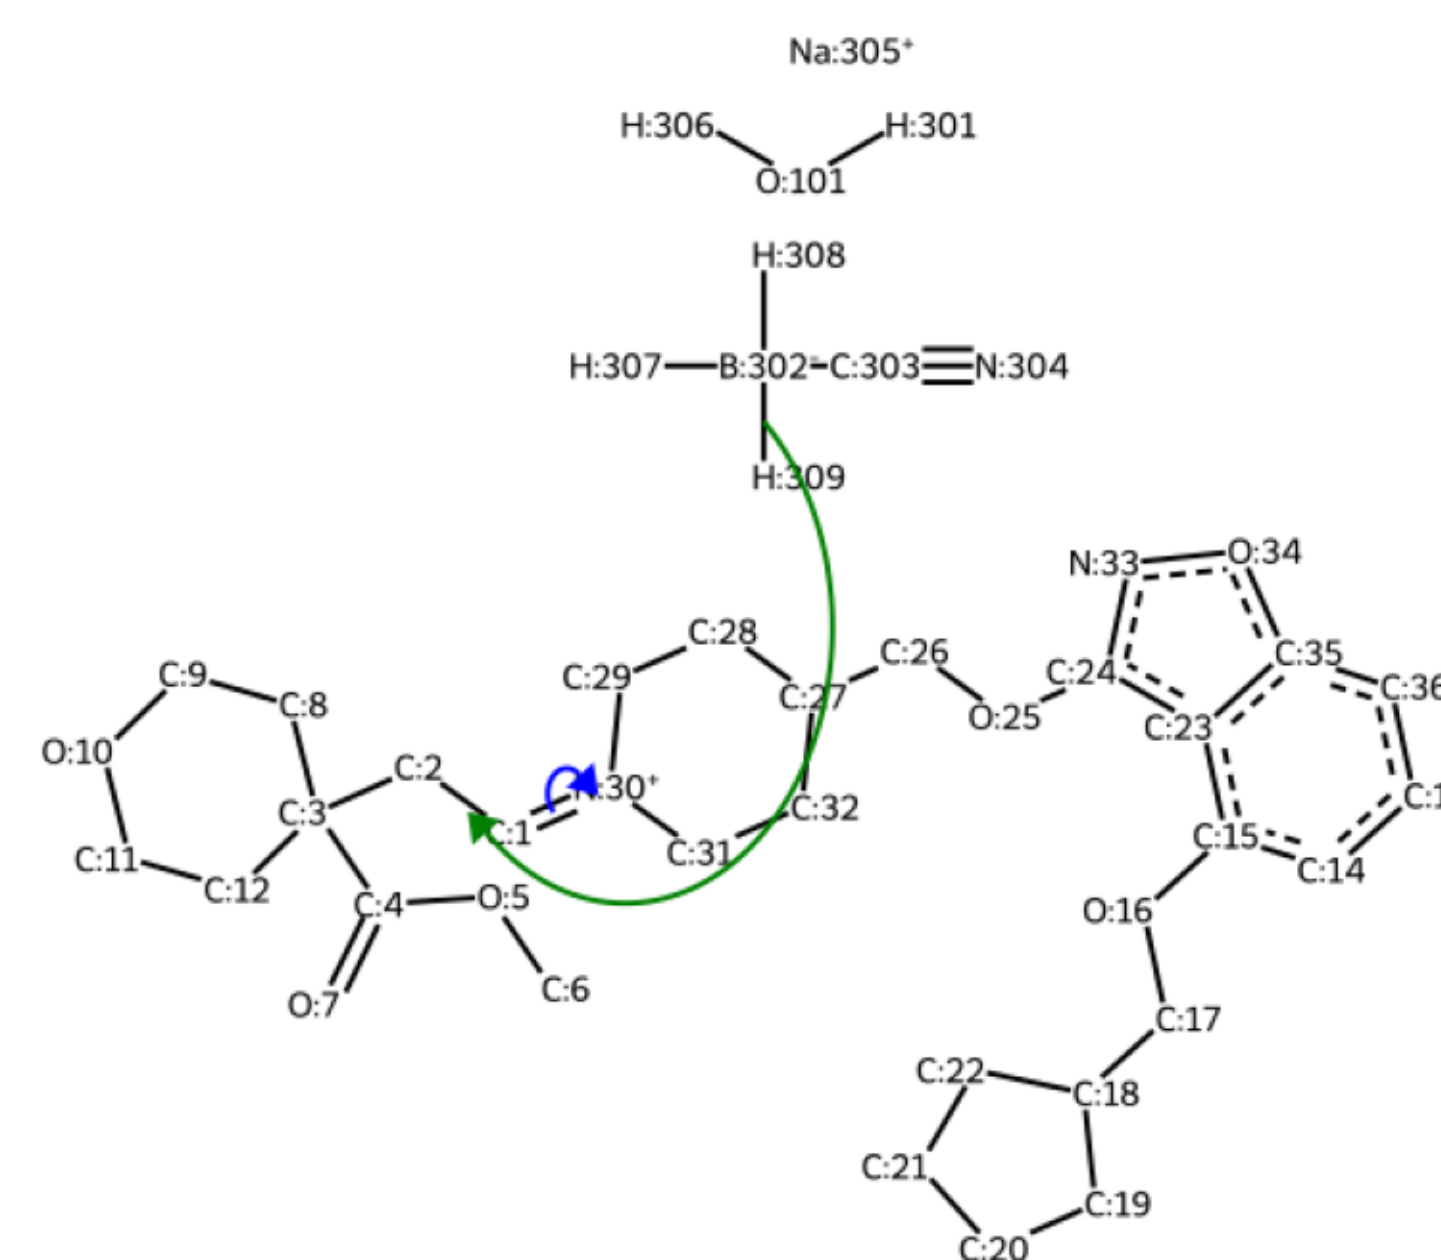

Product(s)

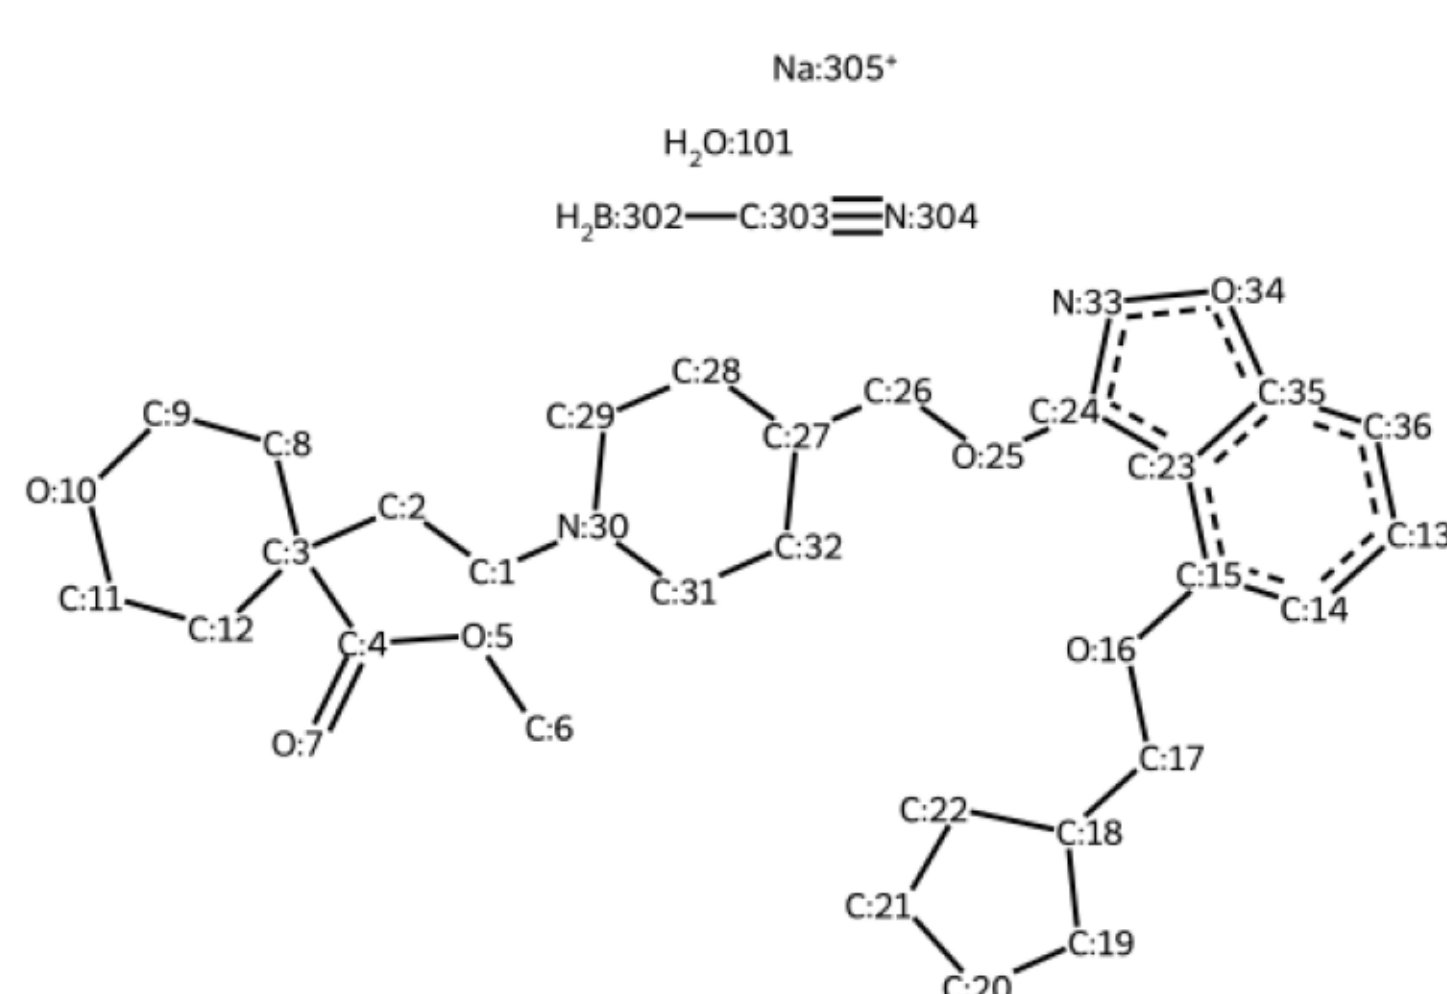



Original reaction  
sampled RXN\_ID:35)

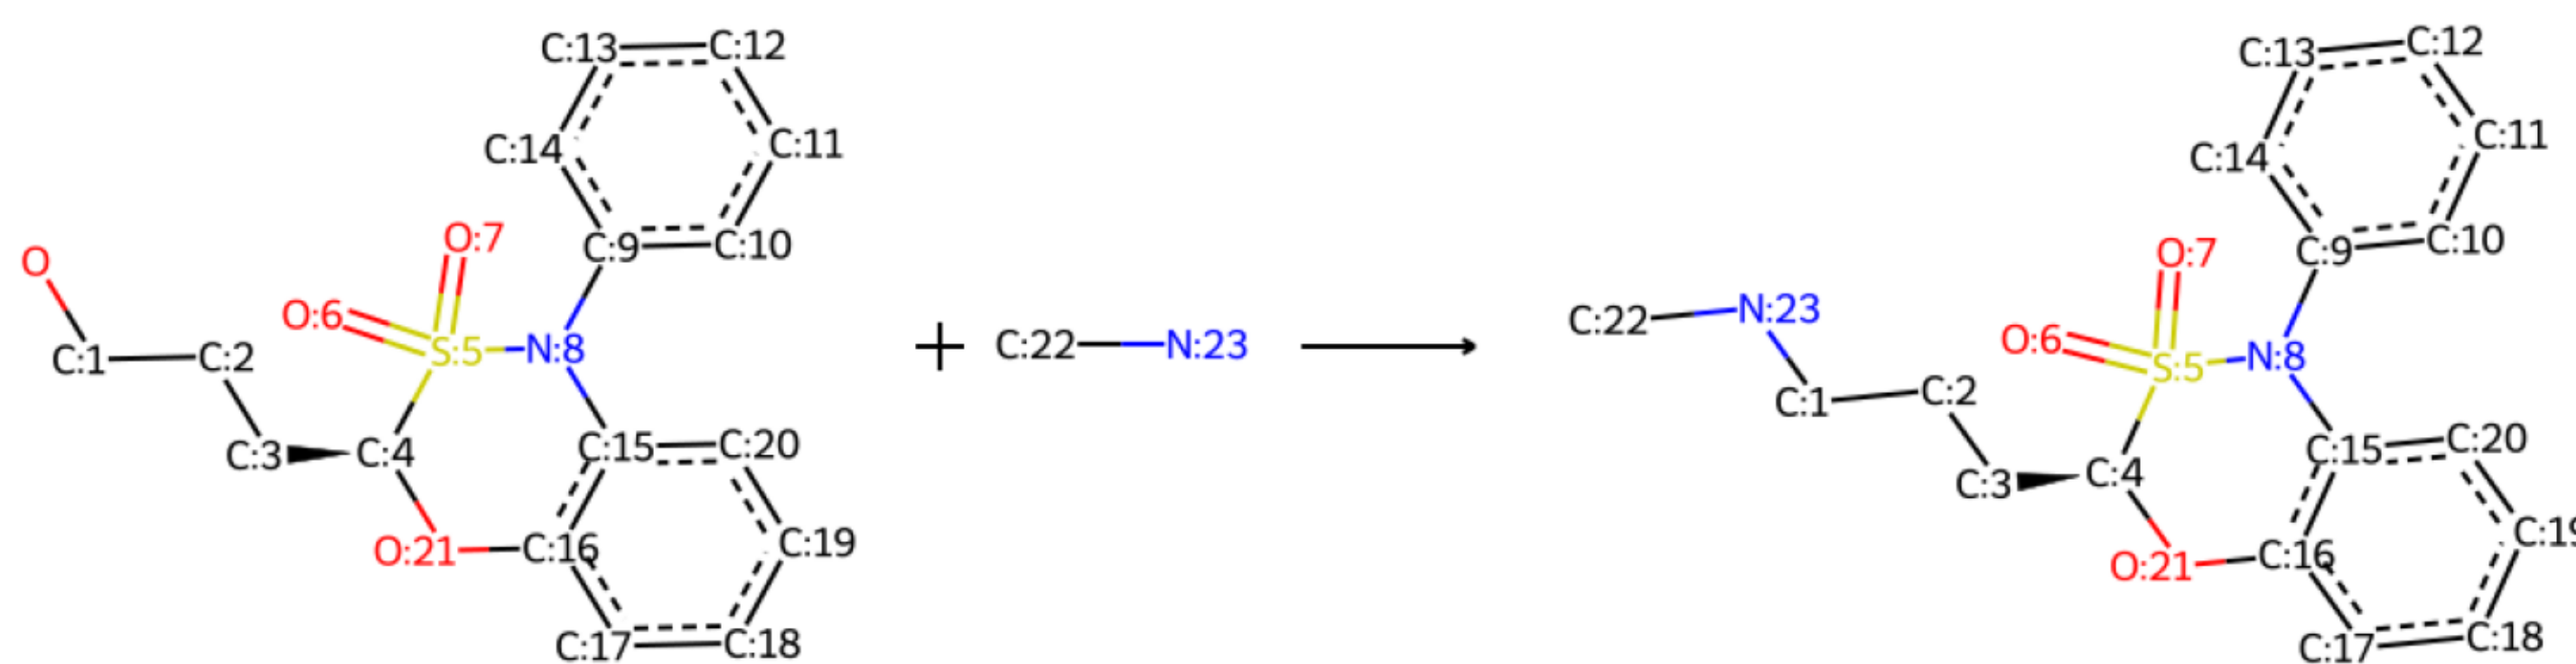

Identified mechanistic class -  
SN2\_with\_tosylate reaction

Reaction with missing reagents recovered

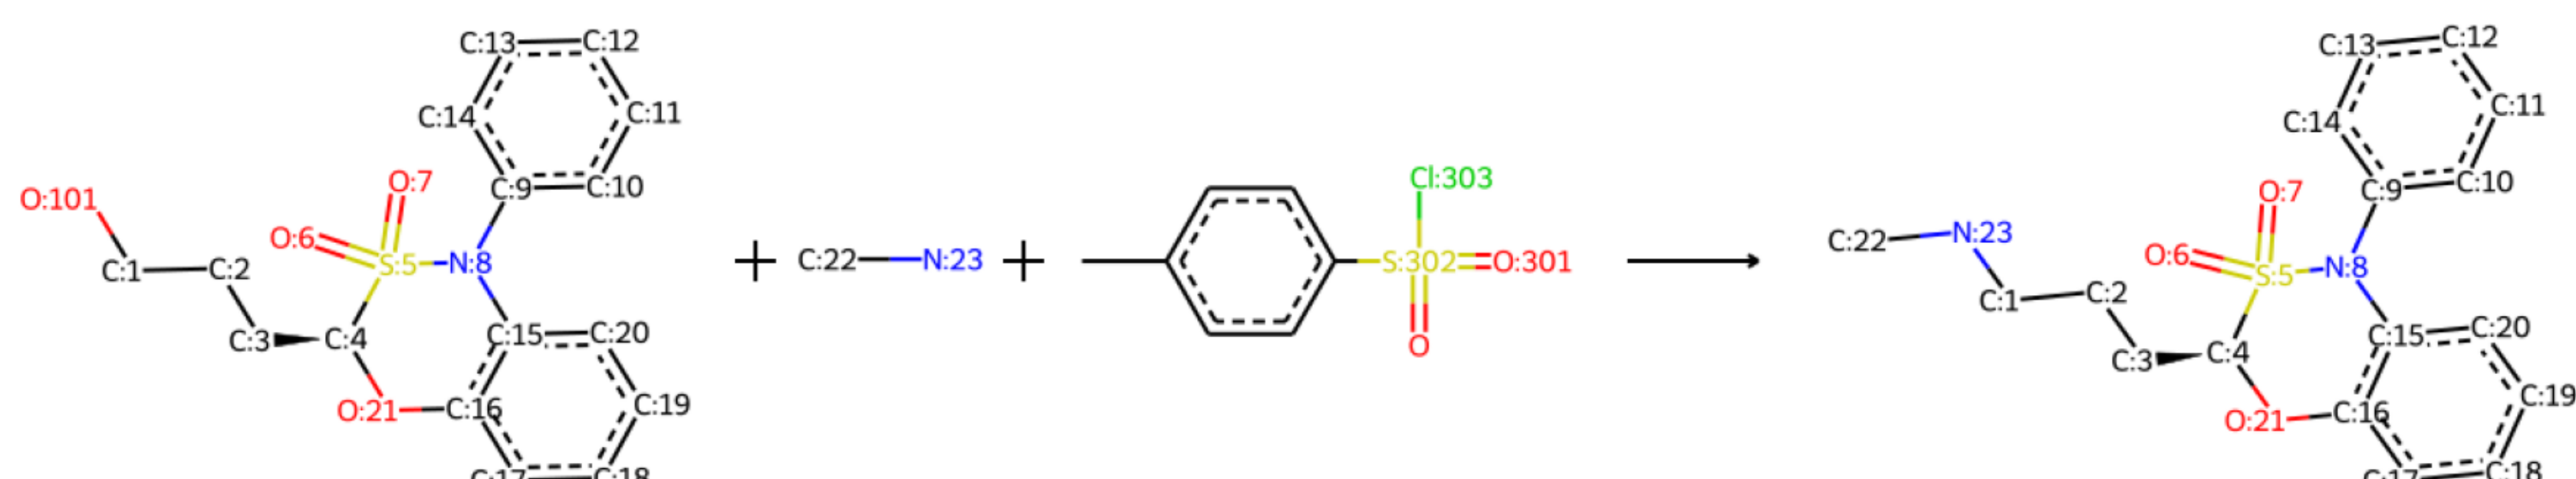

Proposed mechanistic pathway

[Arrow order: (1) green, (2) blue, (3) red, (4) orange]

step #1

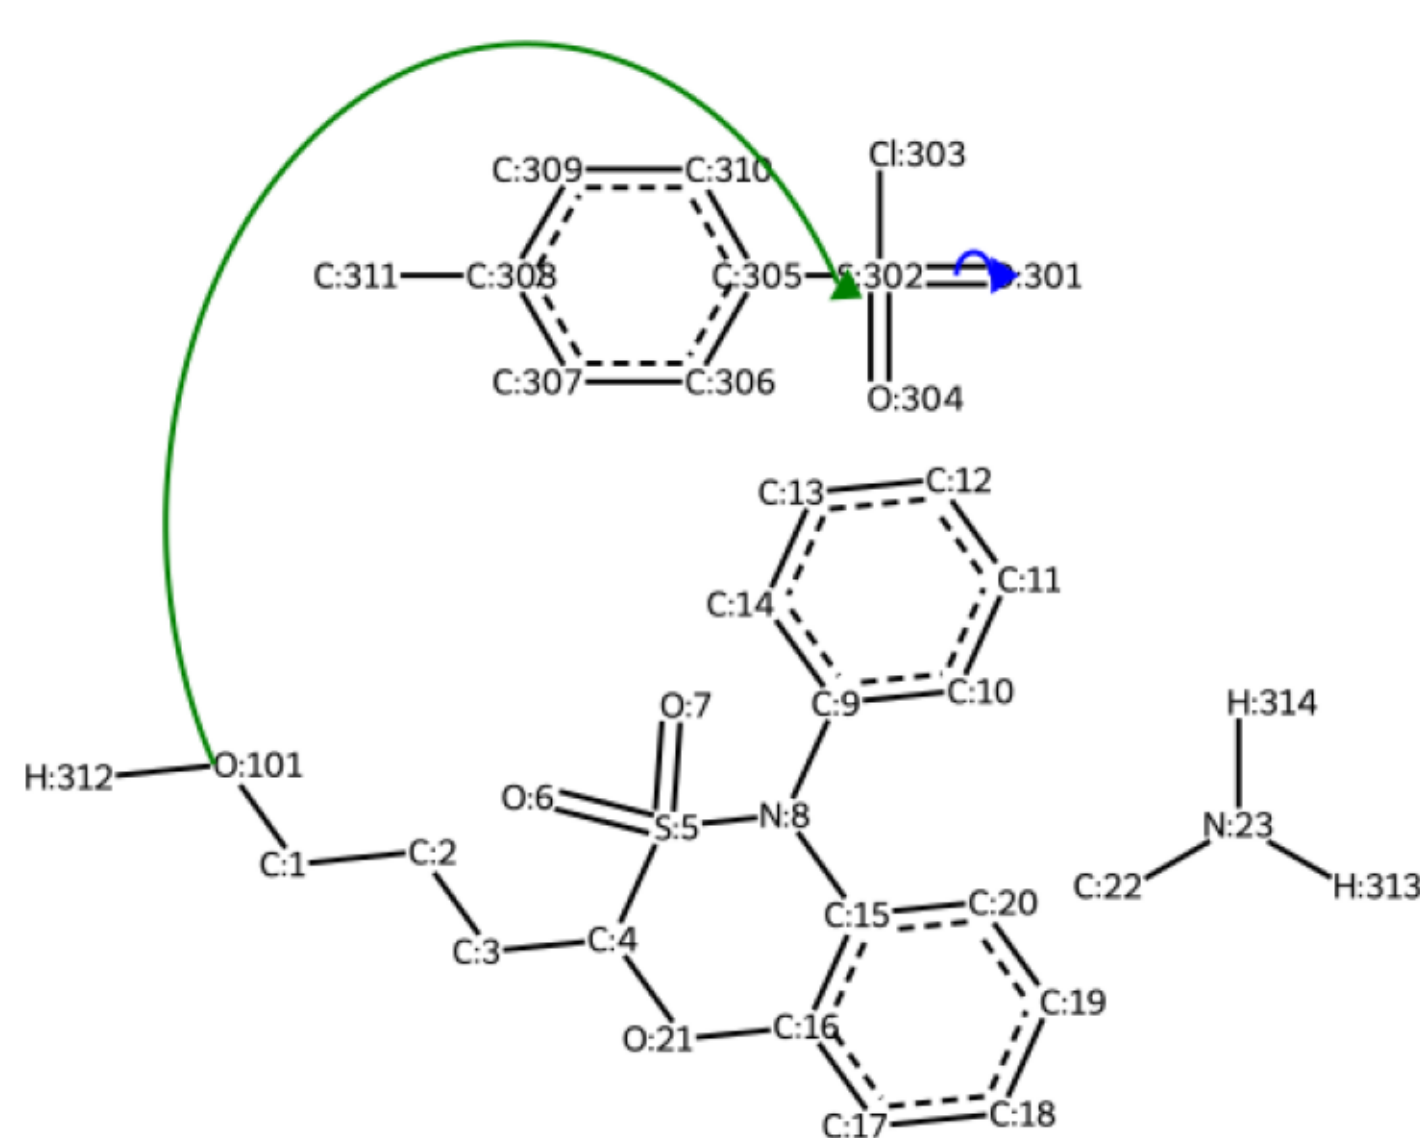

step #2

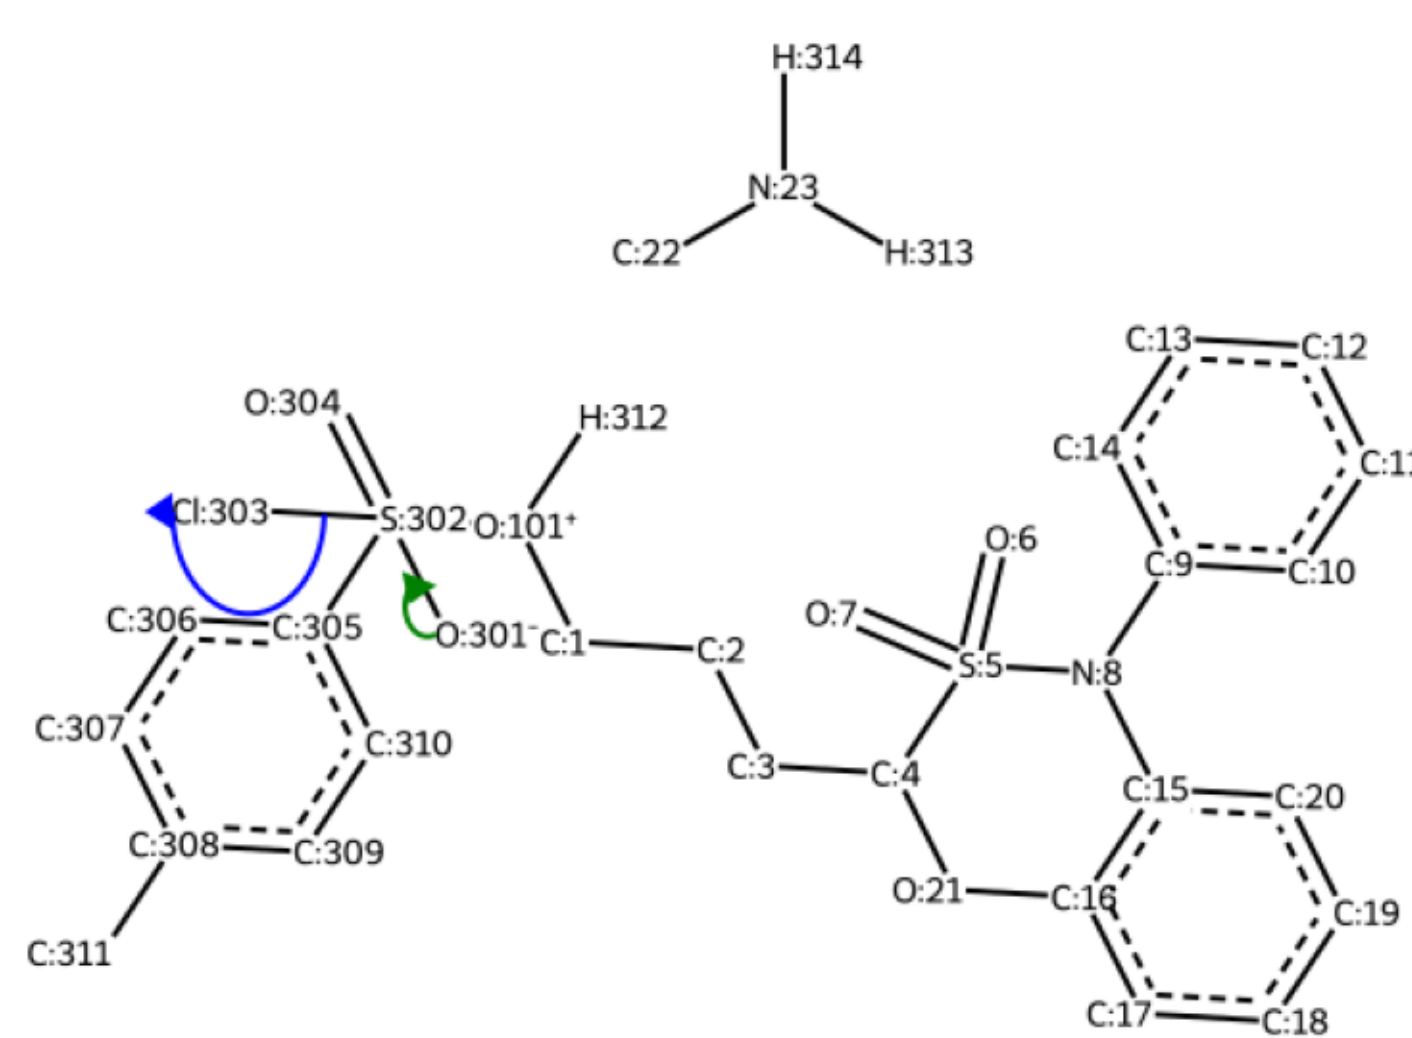

step #3

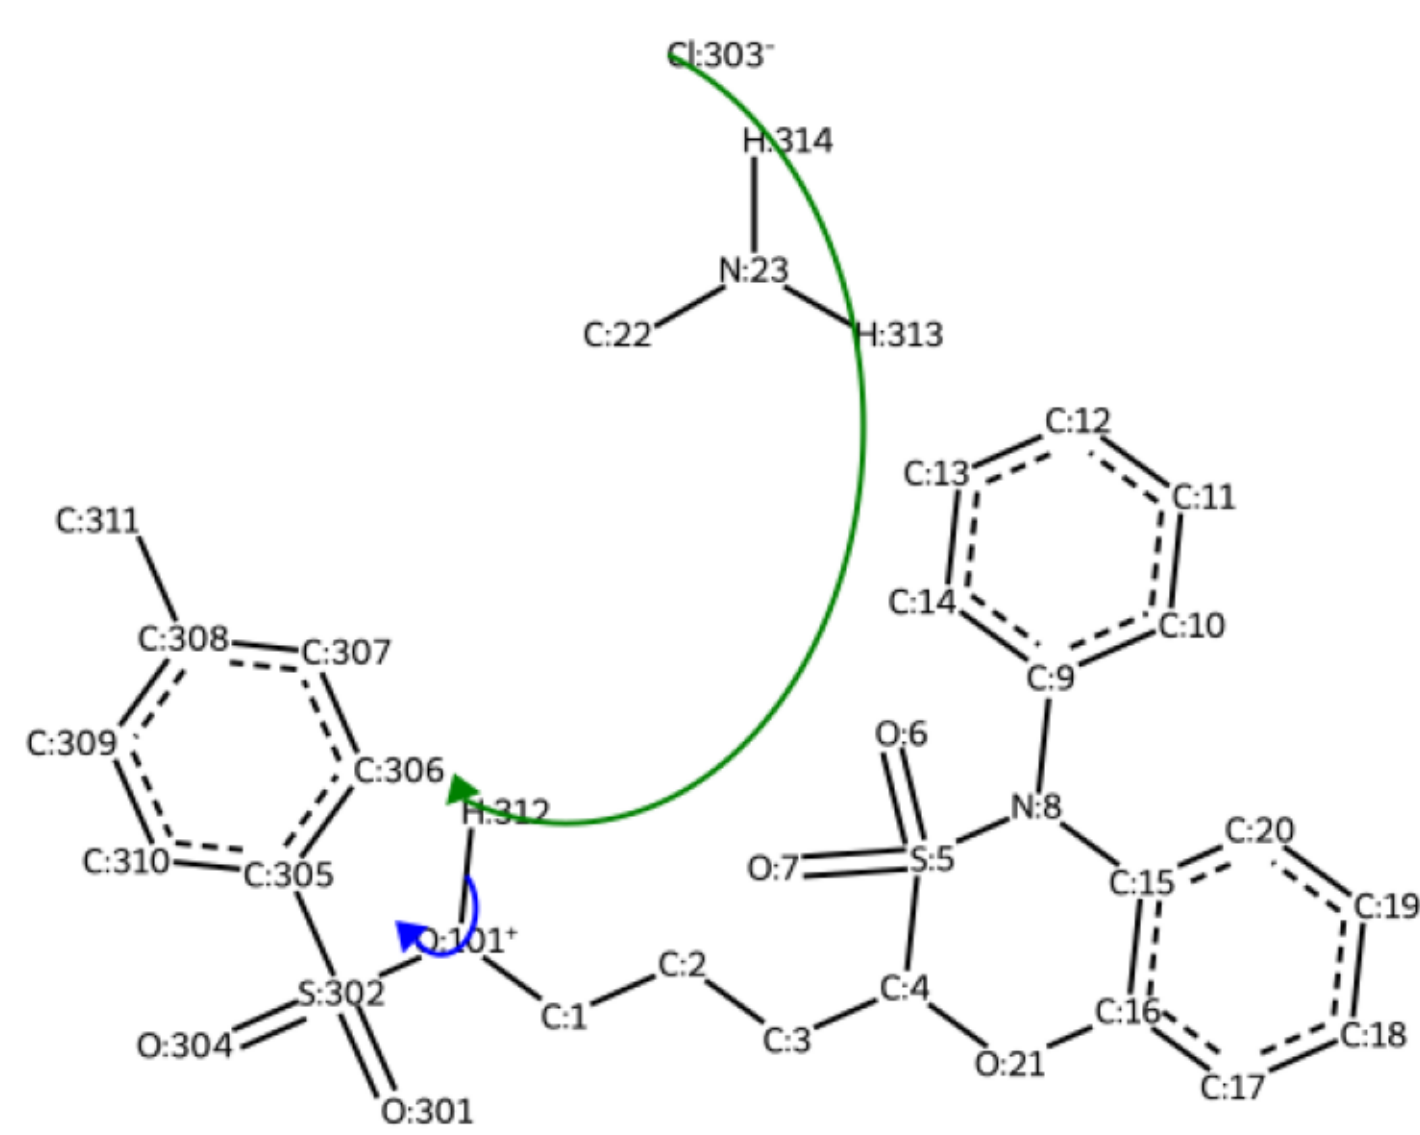

step #4

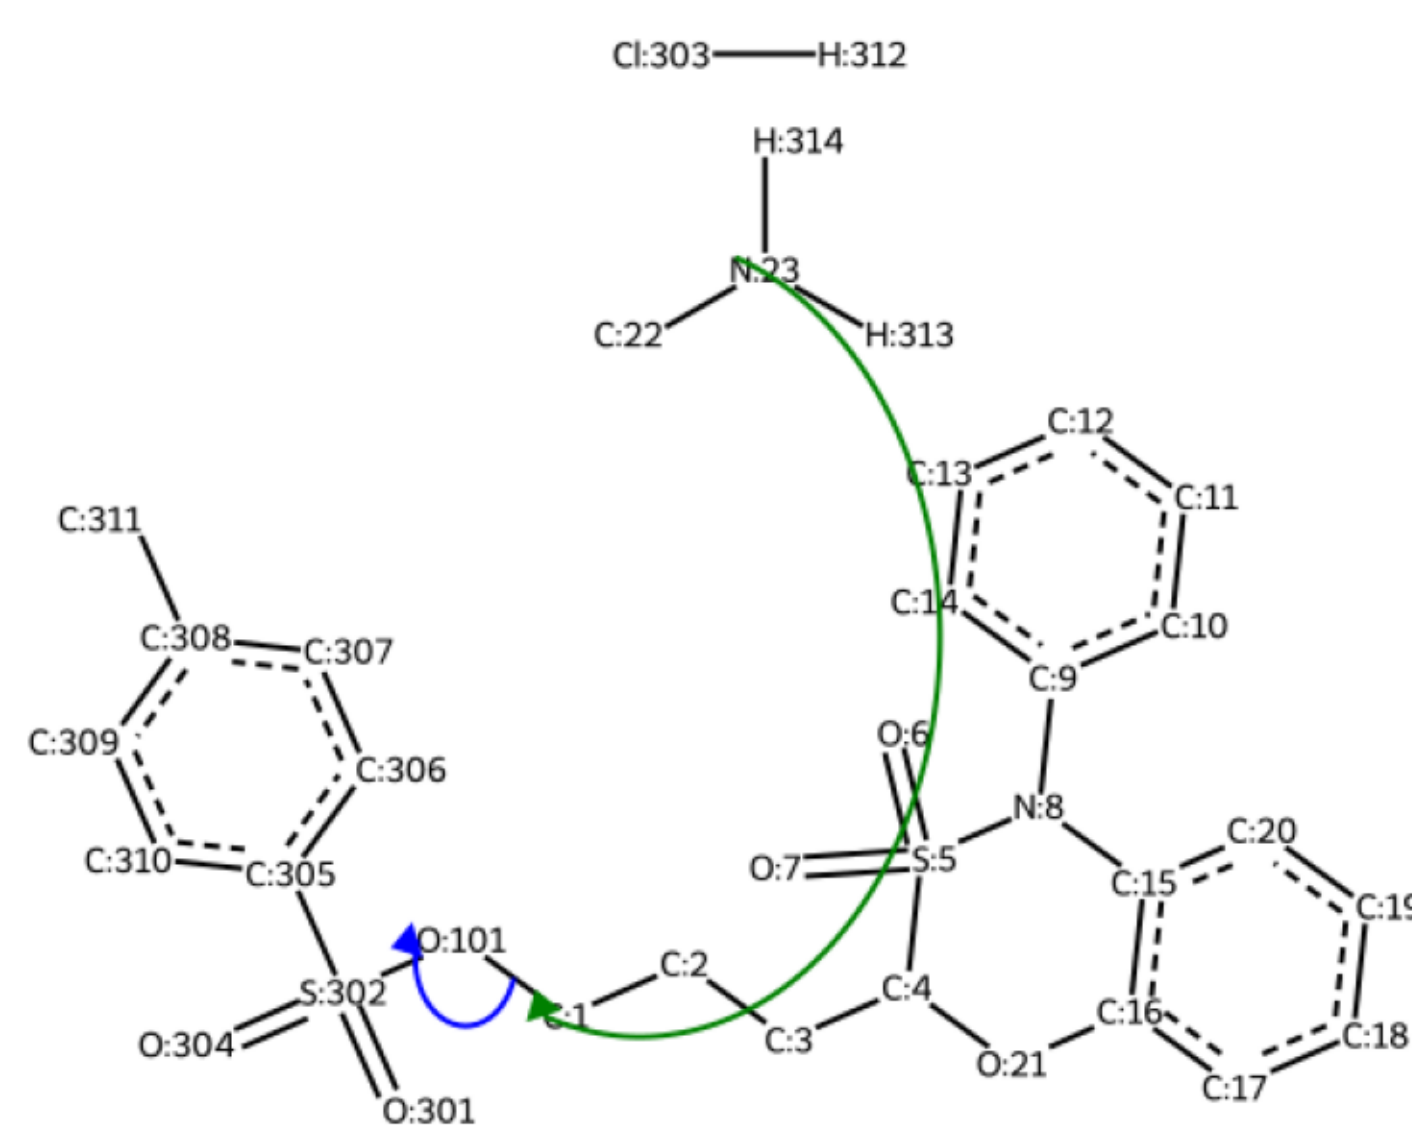

step #5

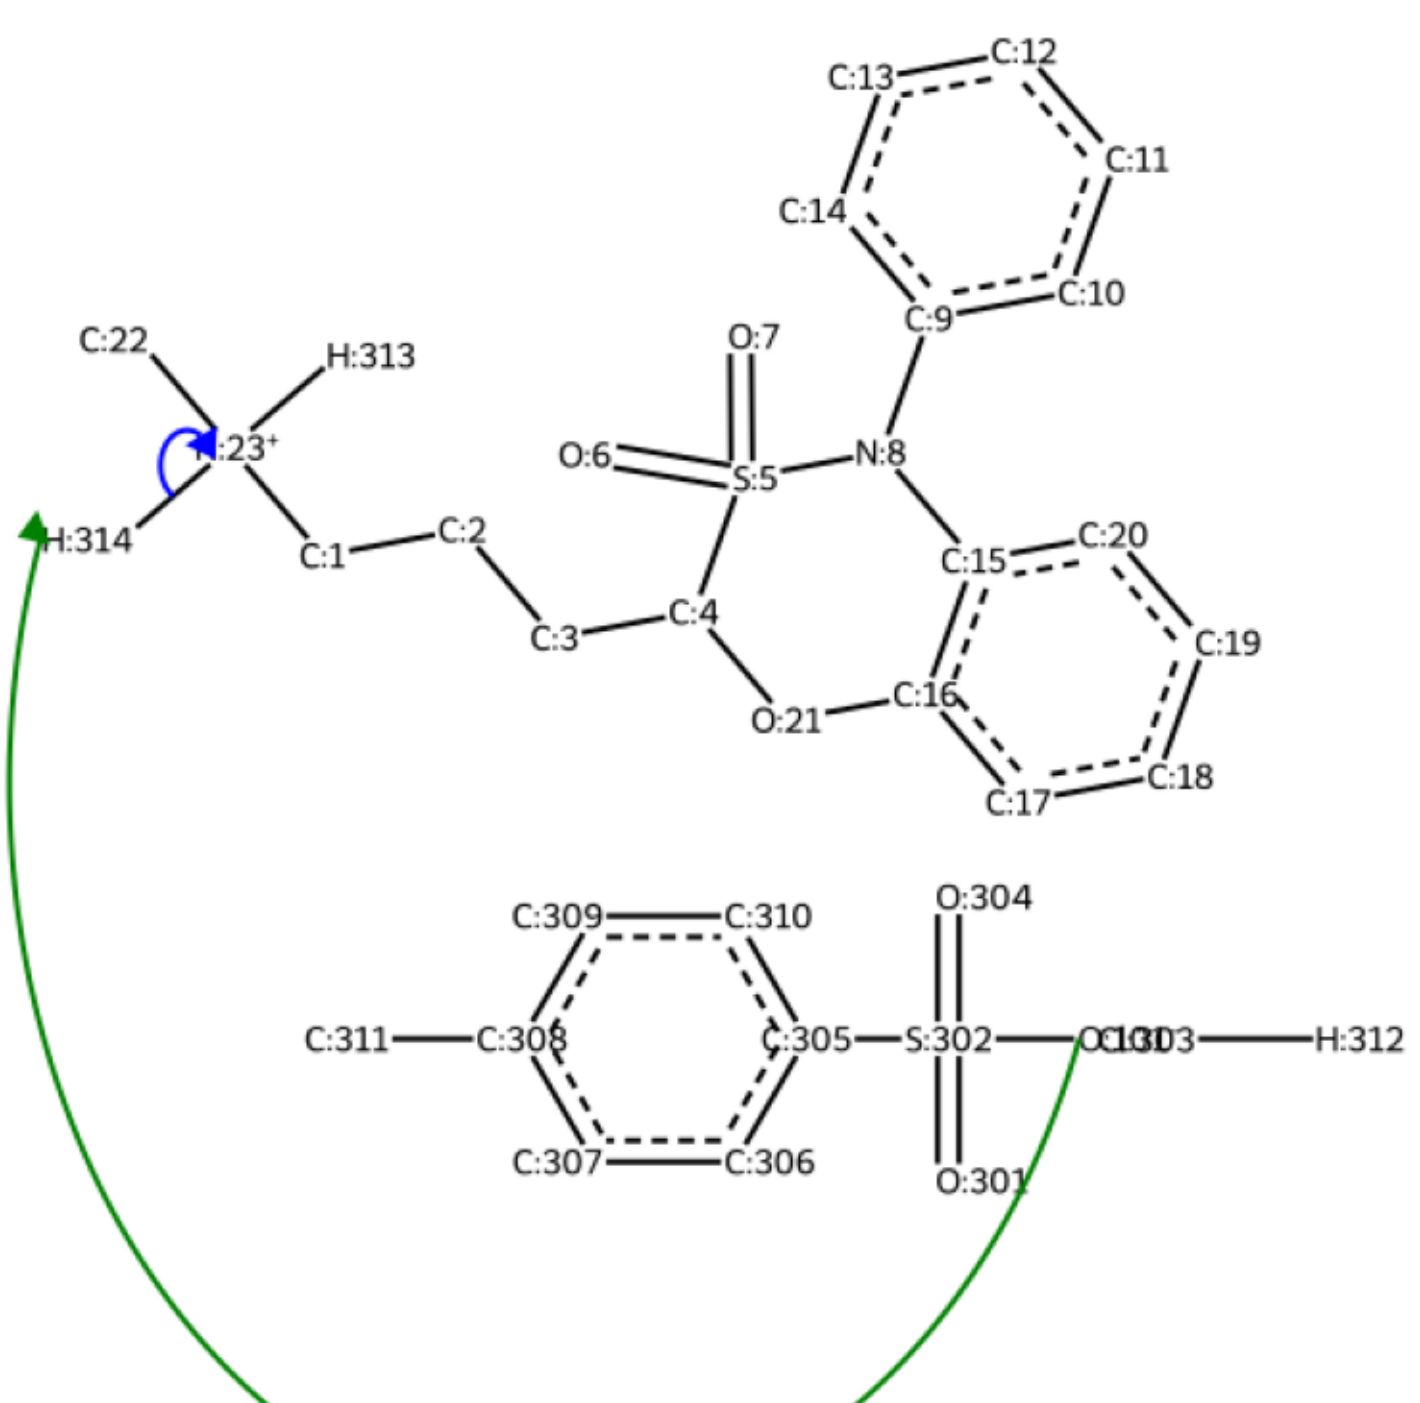

Product(s)

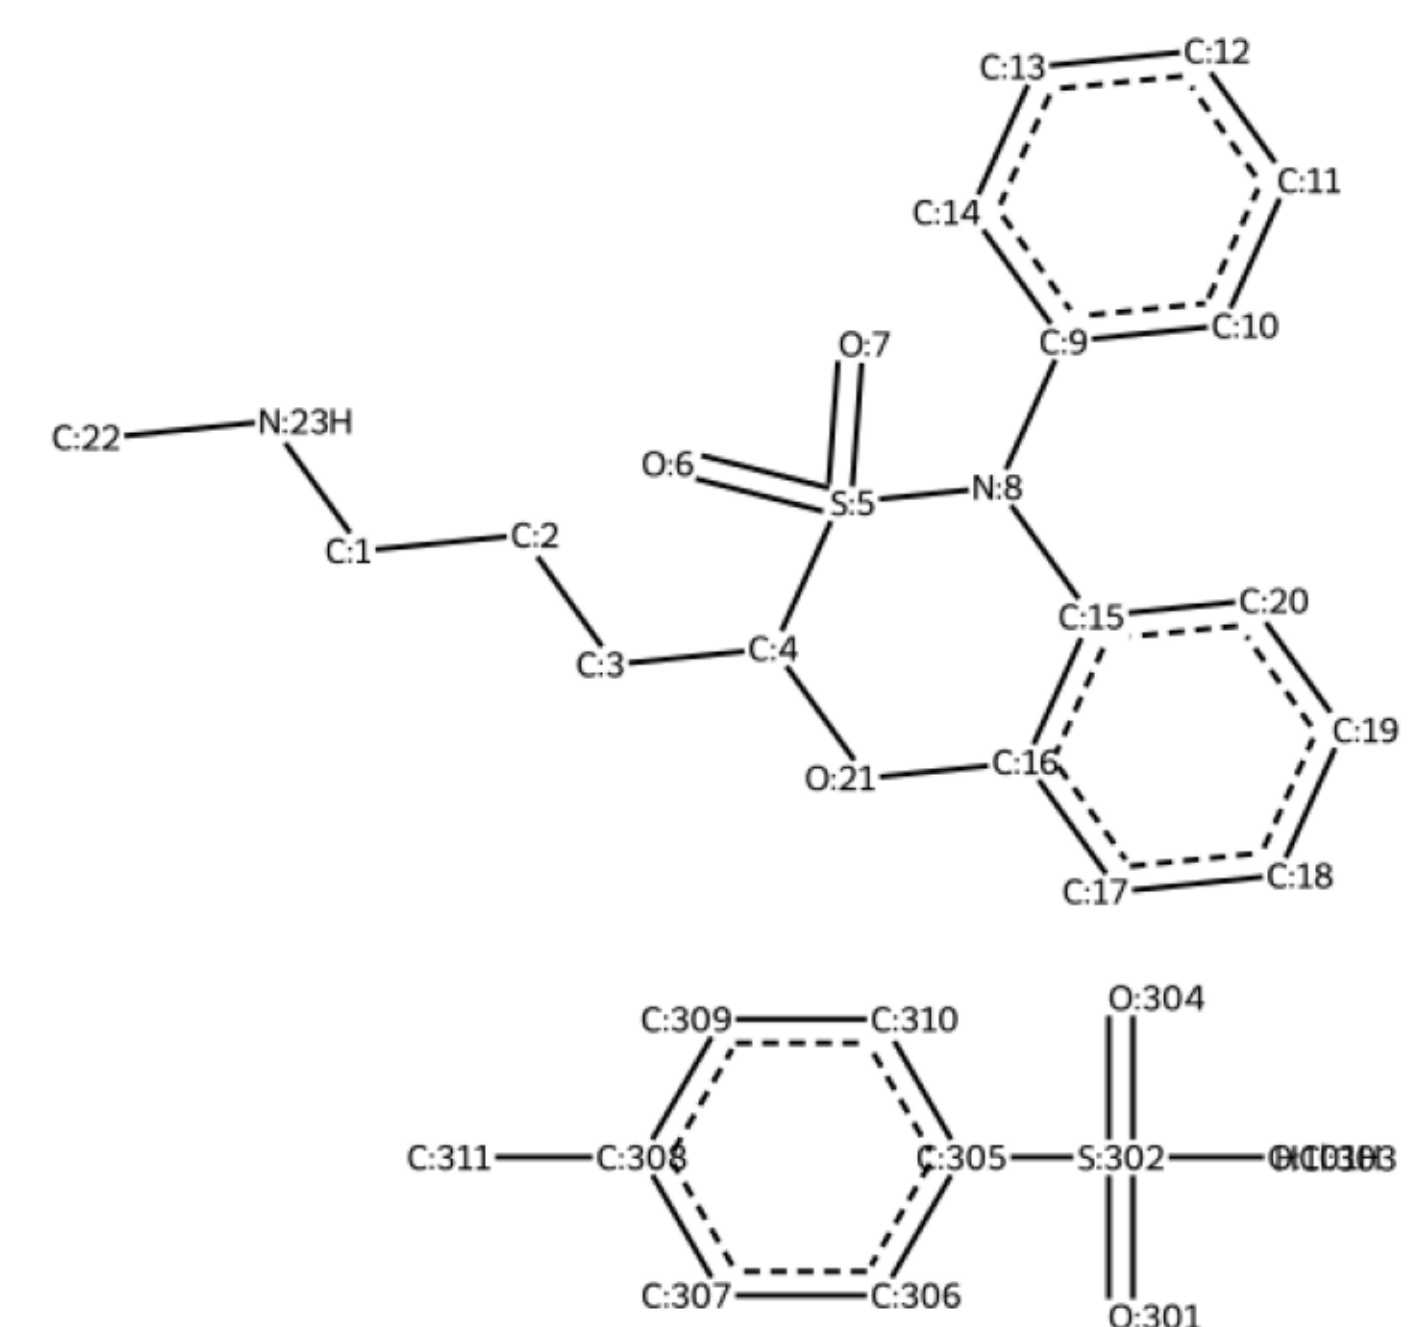



Original reaction  
sampled RXN\_ID:36)

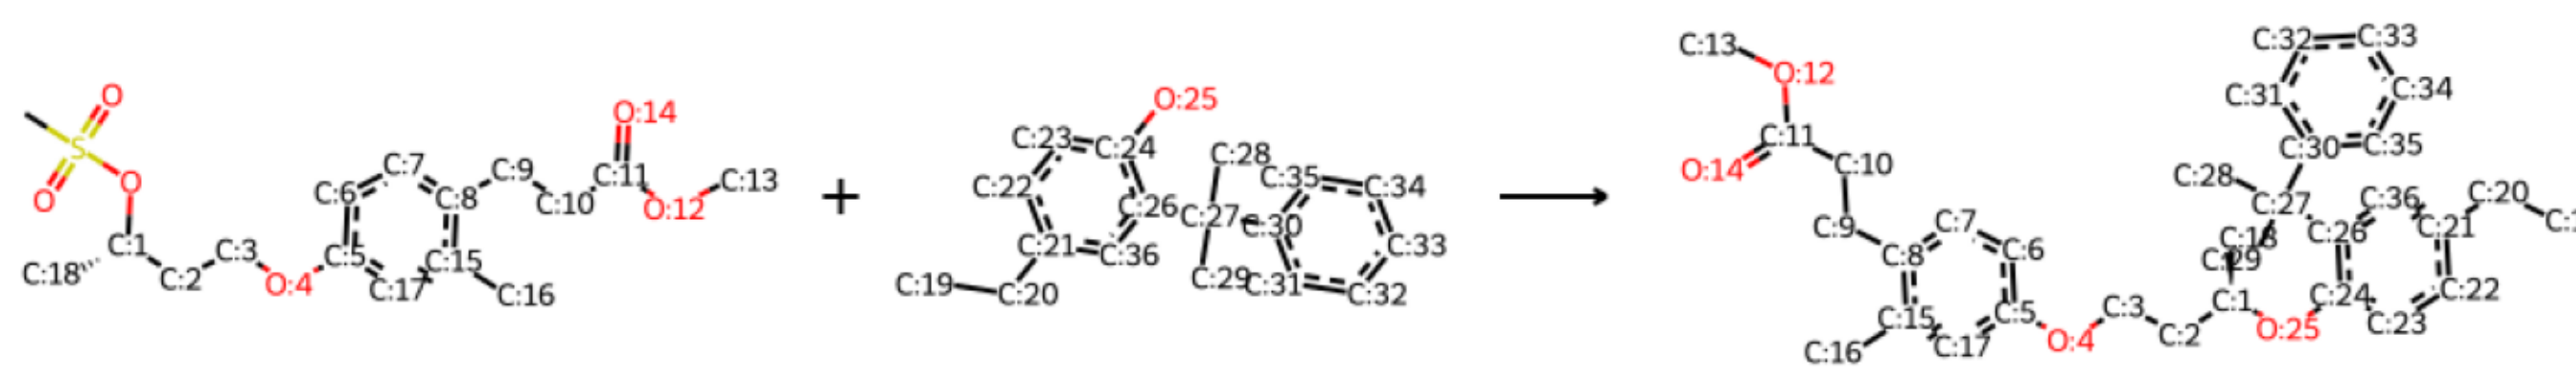

Identified mechanistic class -  
SN1 reaction

Reaction with missing reagents recovered

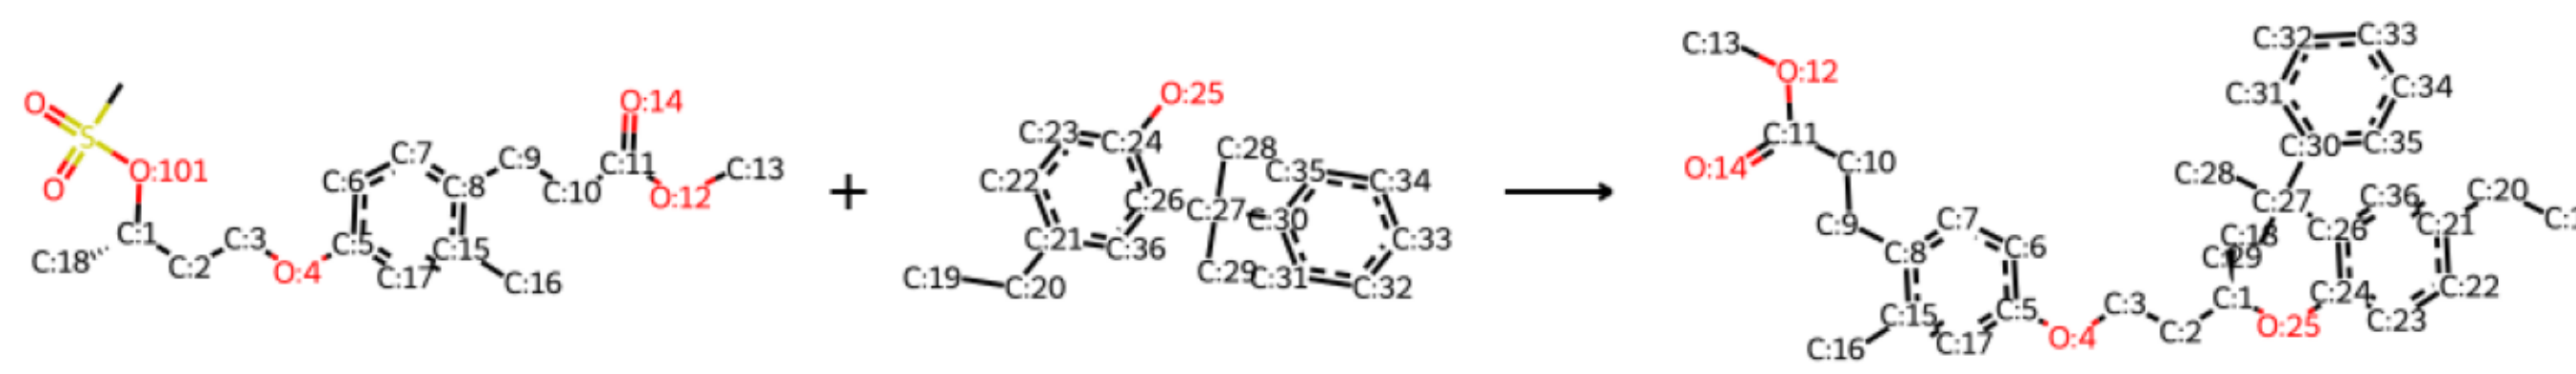

Proposed mechanistic pathway

[Arrow order: (1) green, (2) blue, (3) red, (4) orange]

step #1

step #2

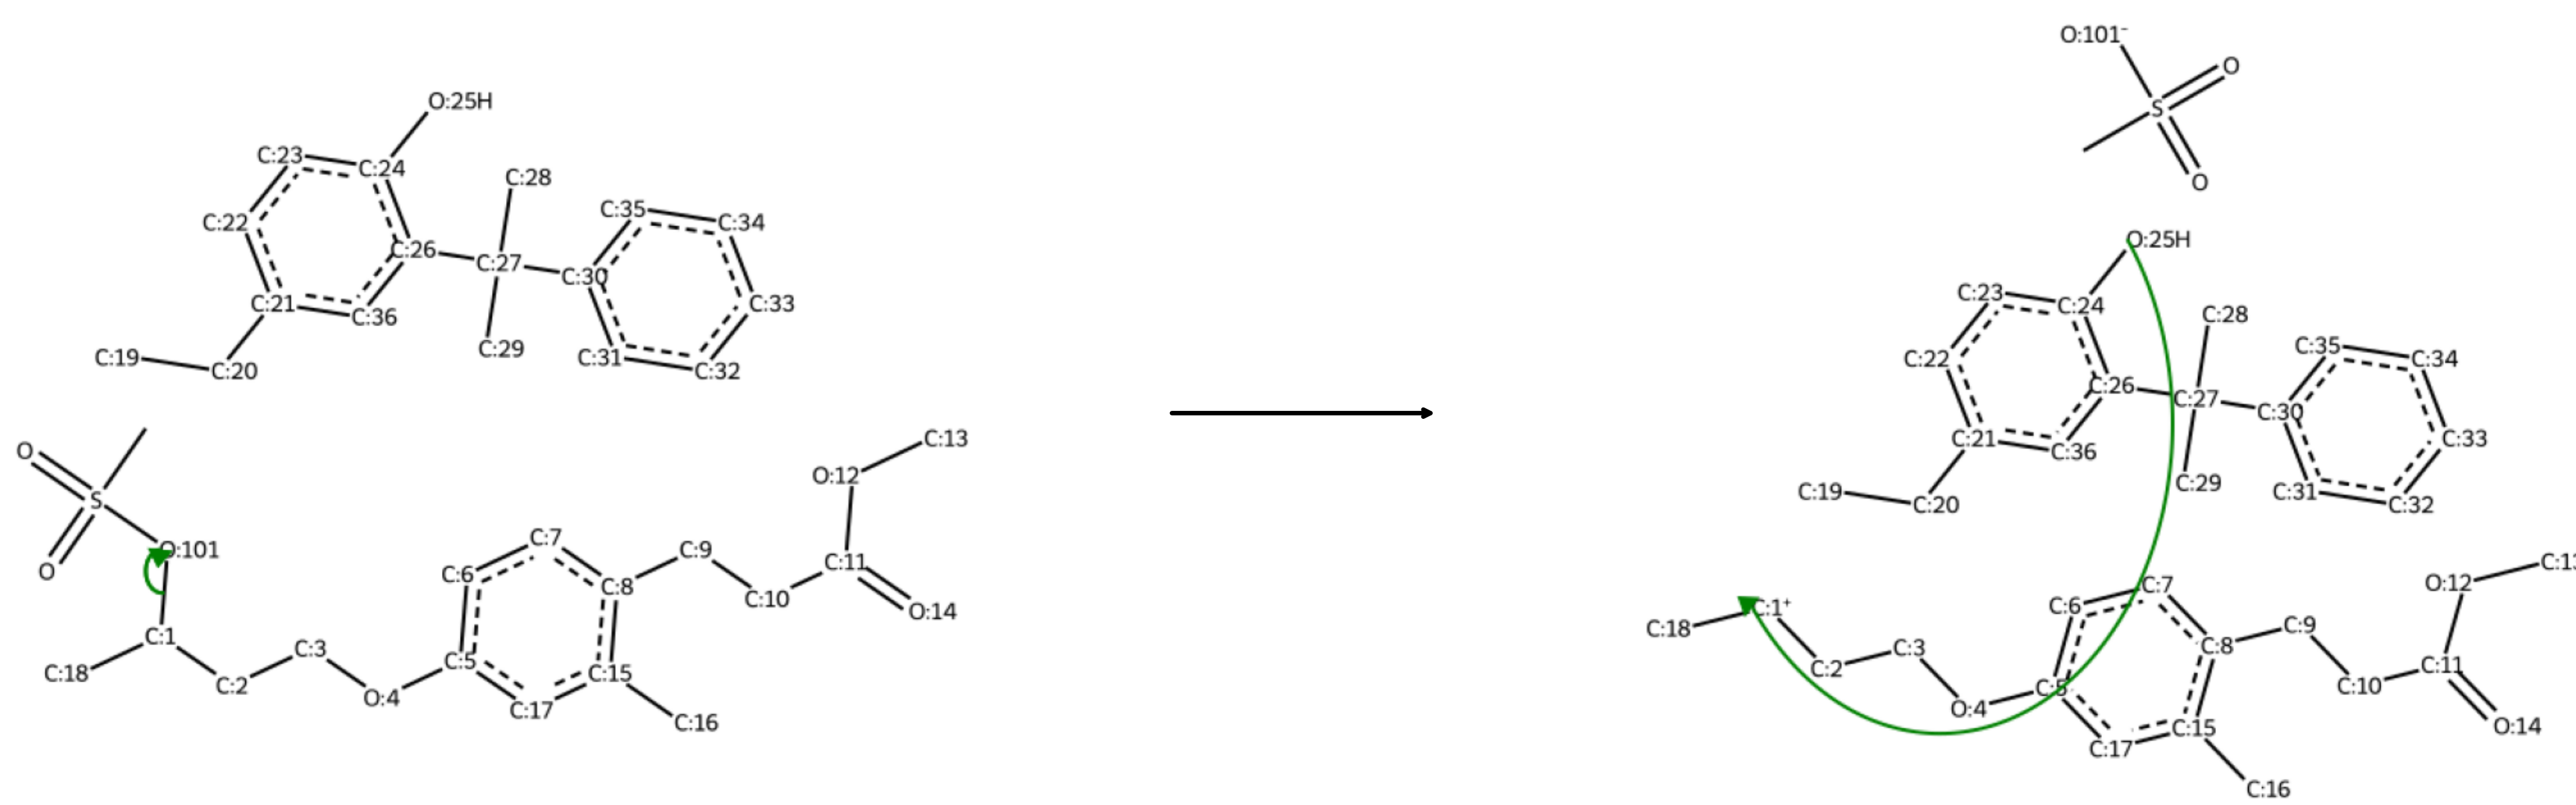

Product(s)

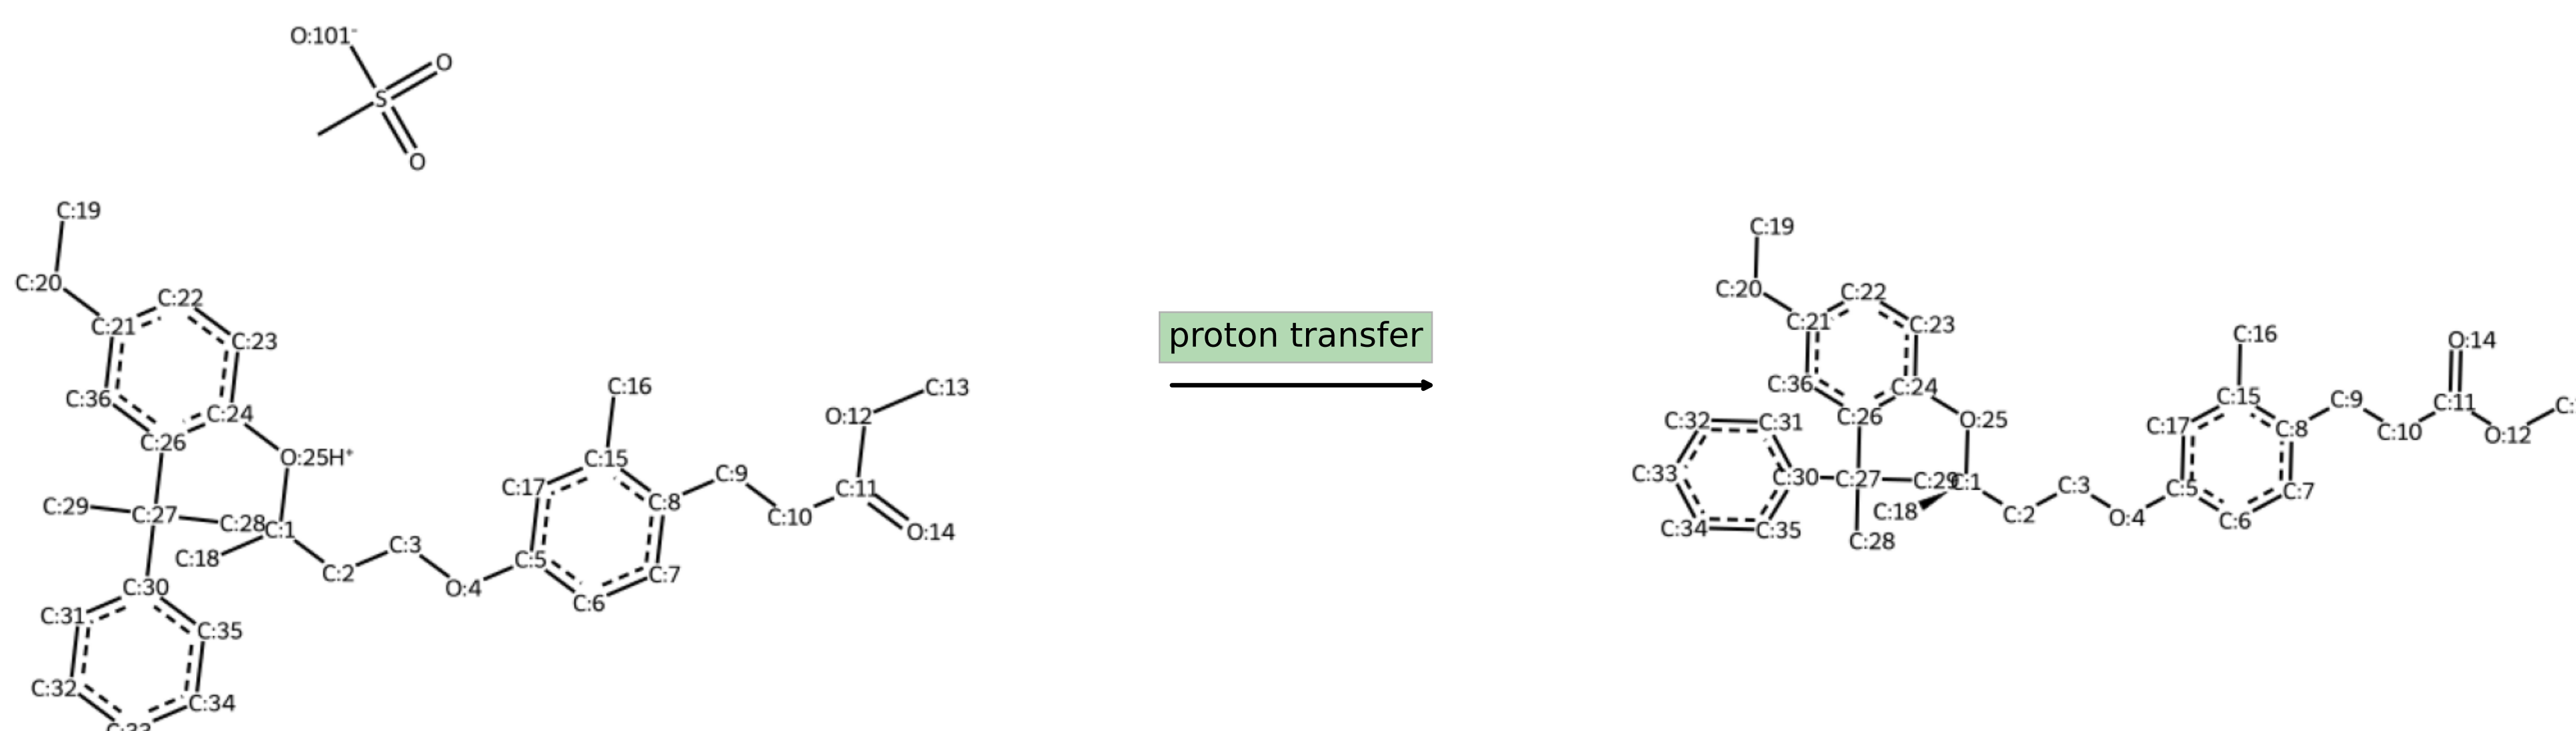



# Original reaction sampled RXN\_ID:37)

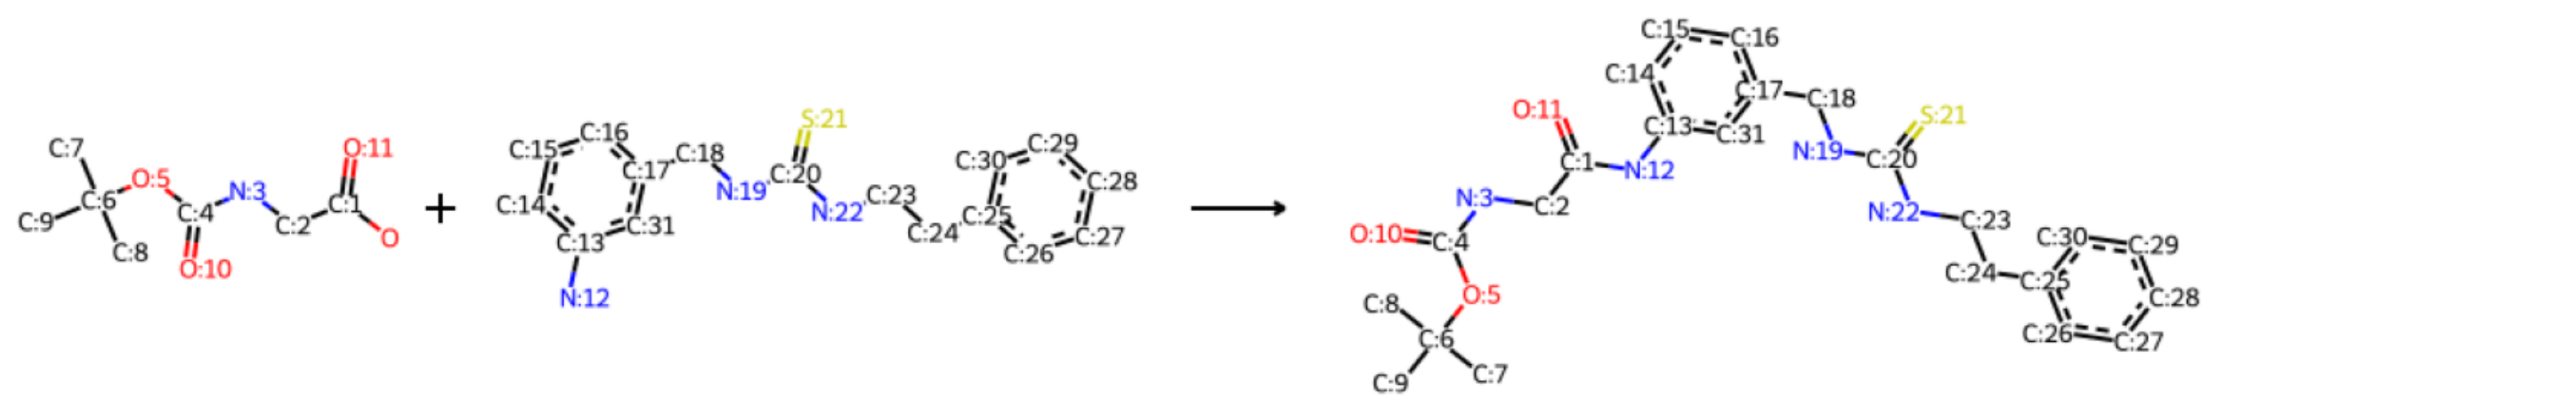

Identified mechanistic class -  
DCC\_condensation reaction

## Reaction with missing reagents recovered

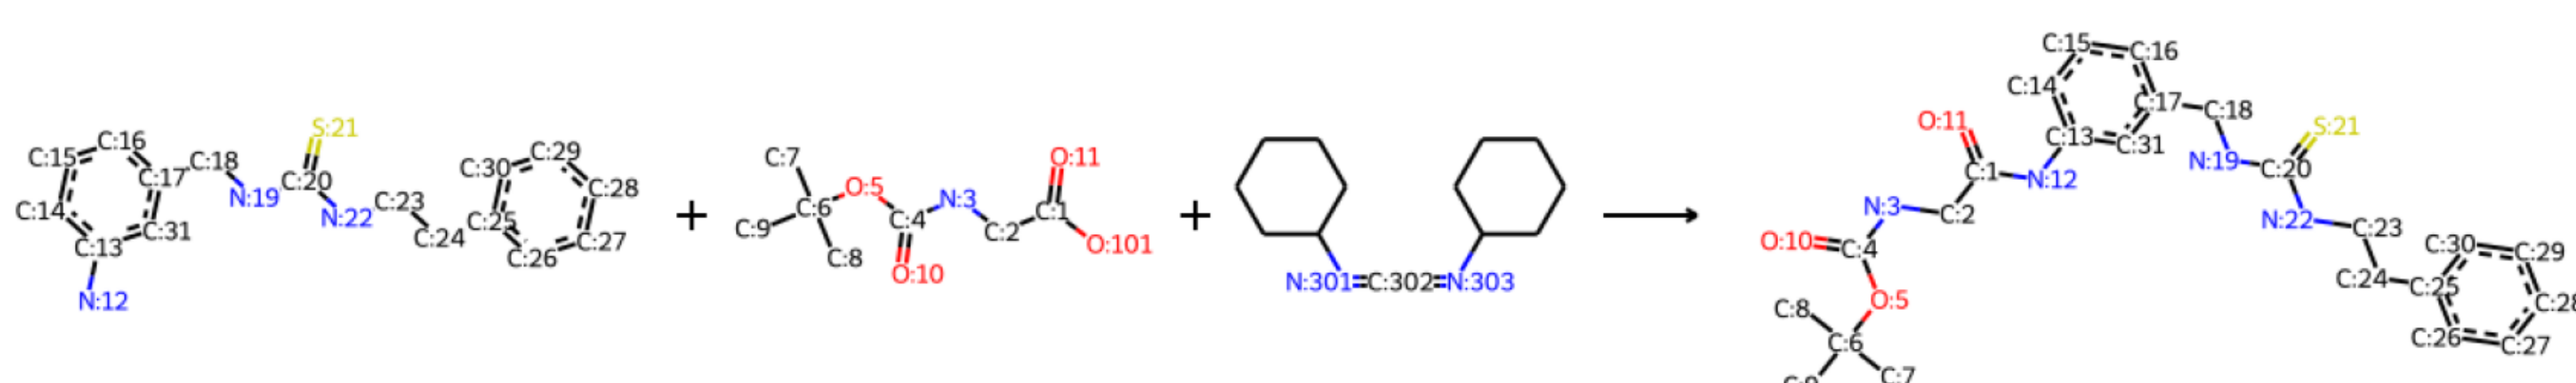

## Proposed mechanistic pathway

[Arrow order: (1) green, (2) blue, (3) red, (4) orange]

step #1

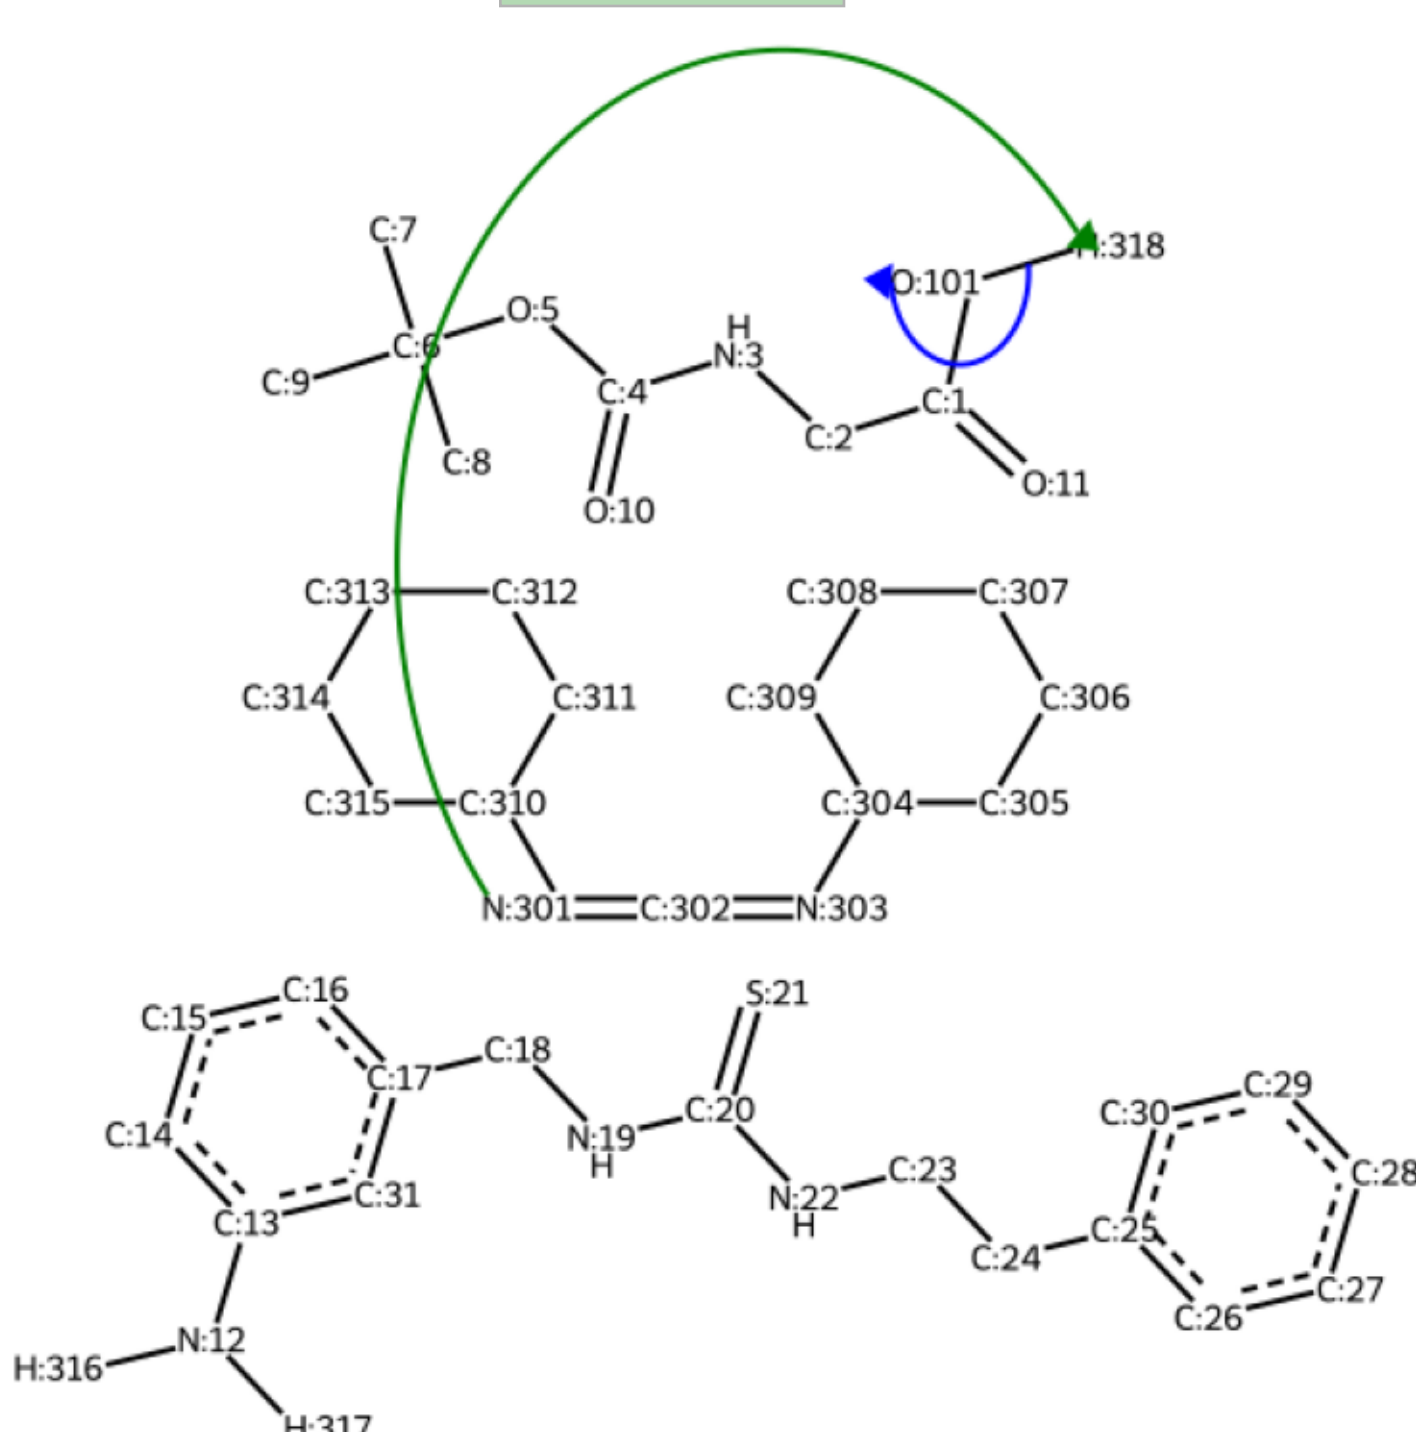

step #2

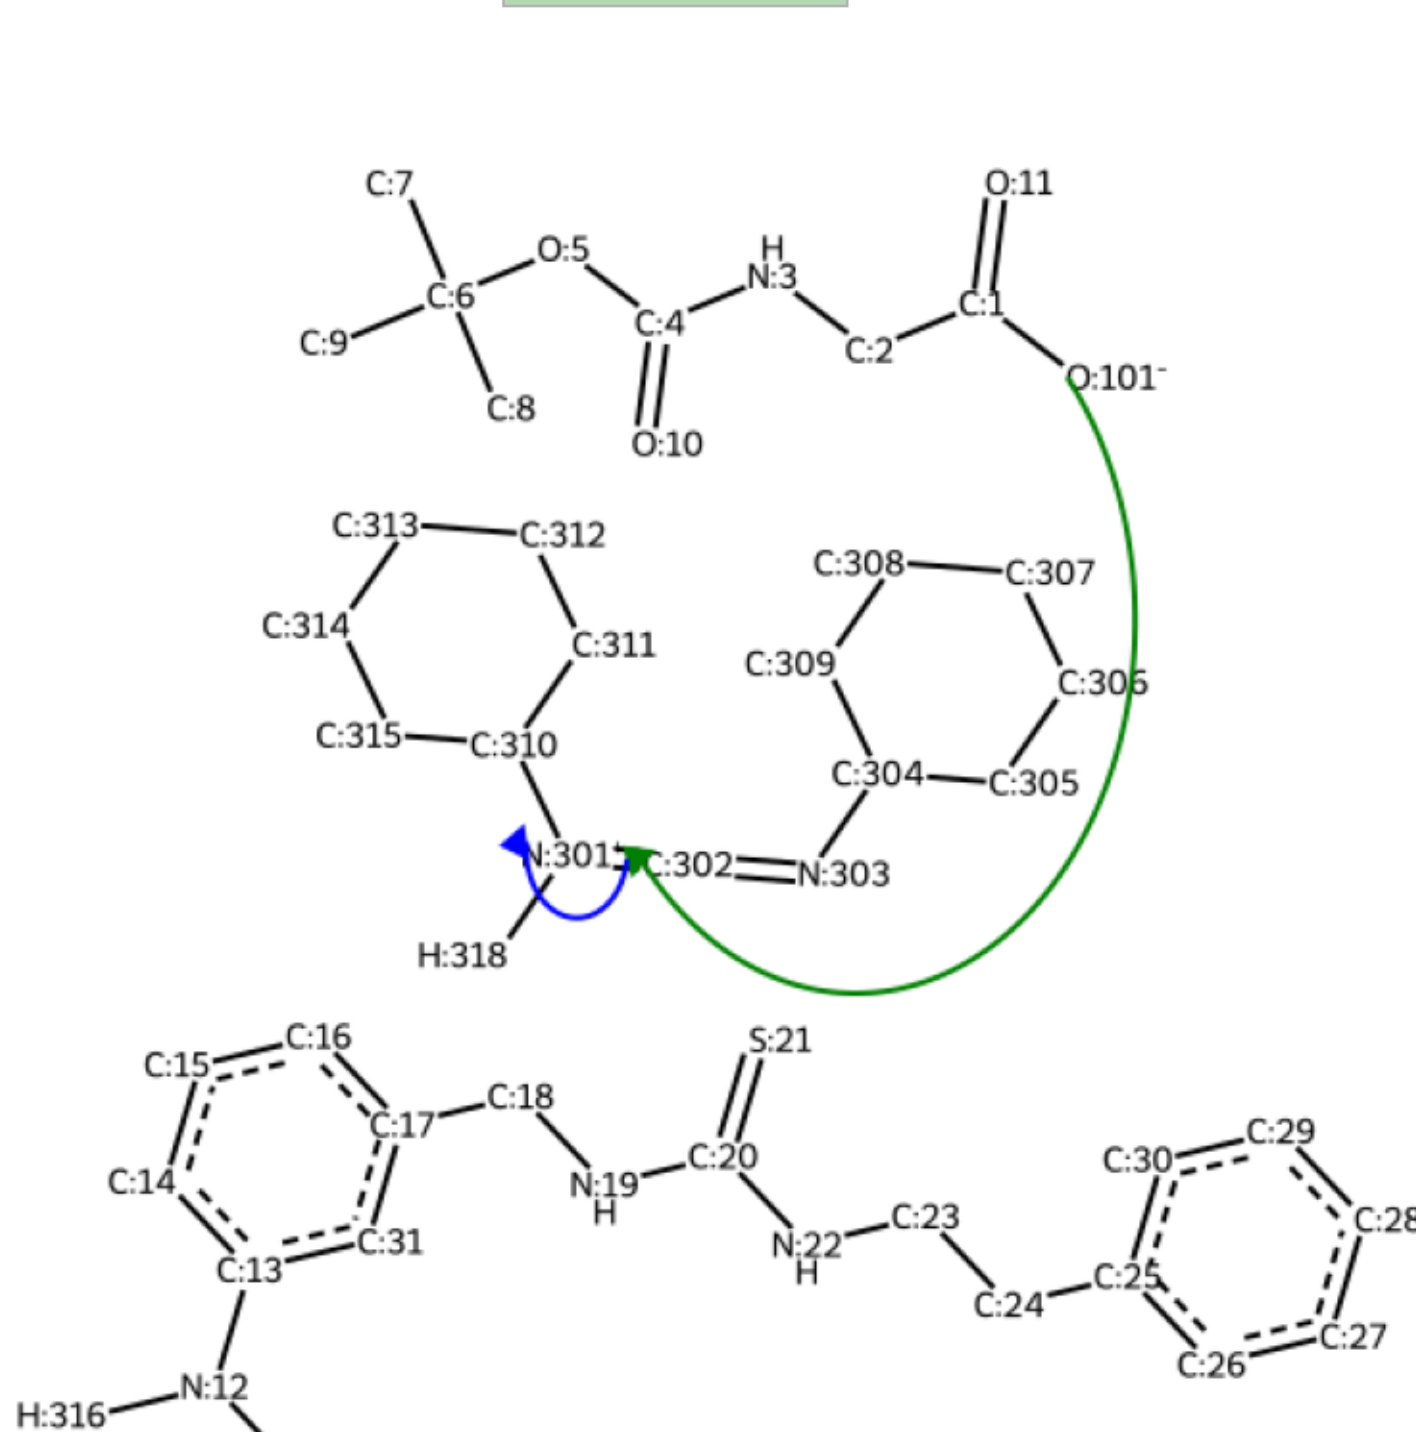

step #3

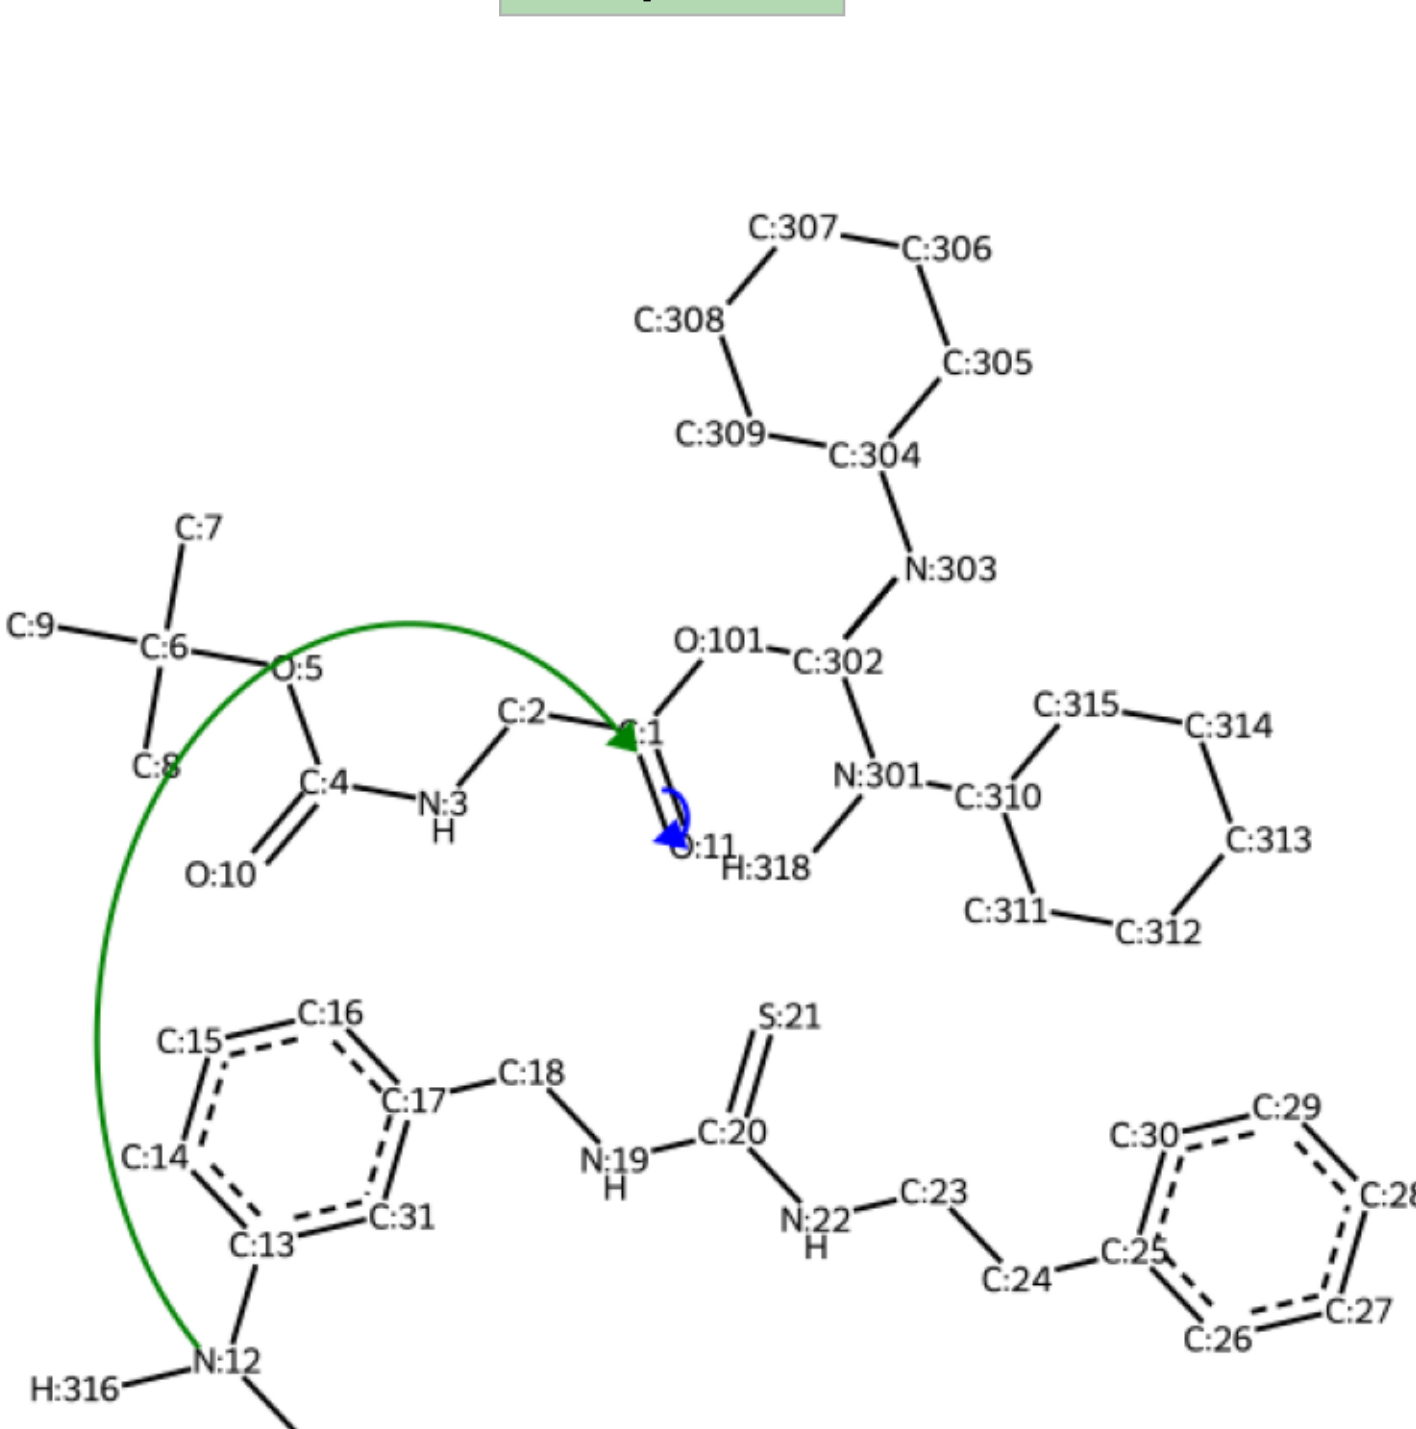

step #4

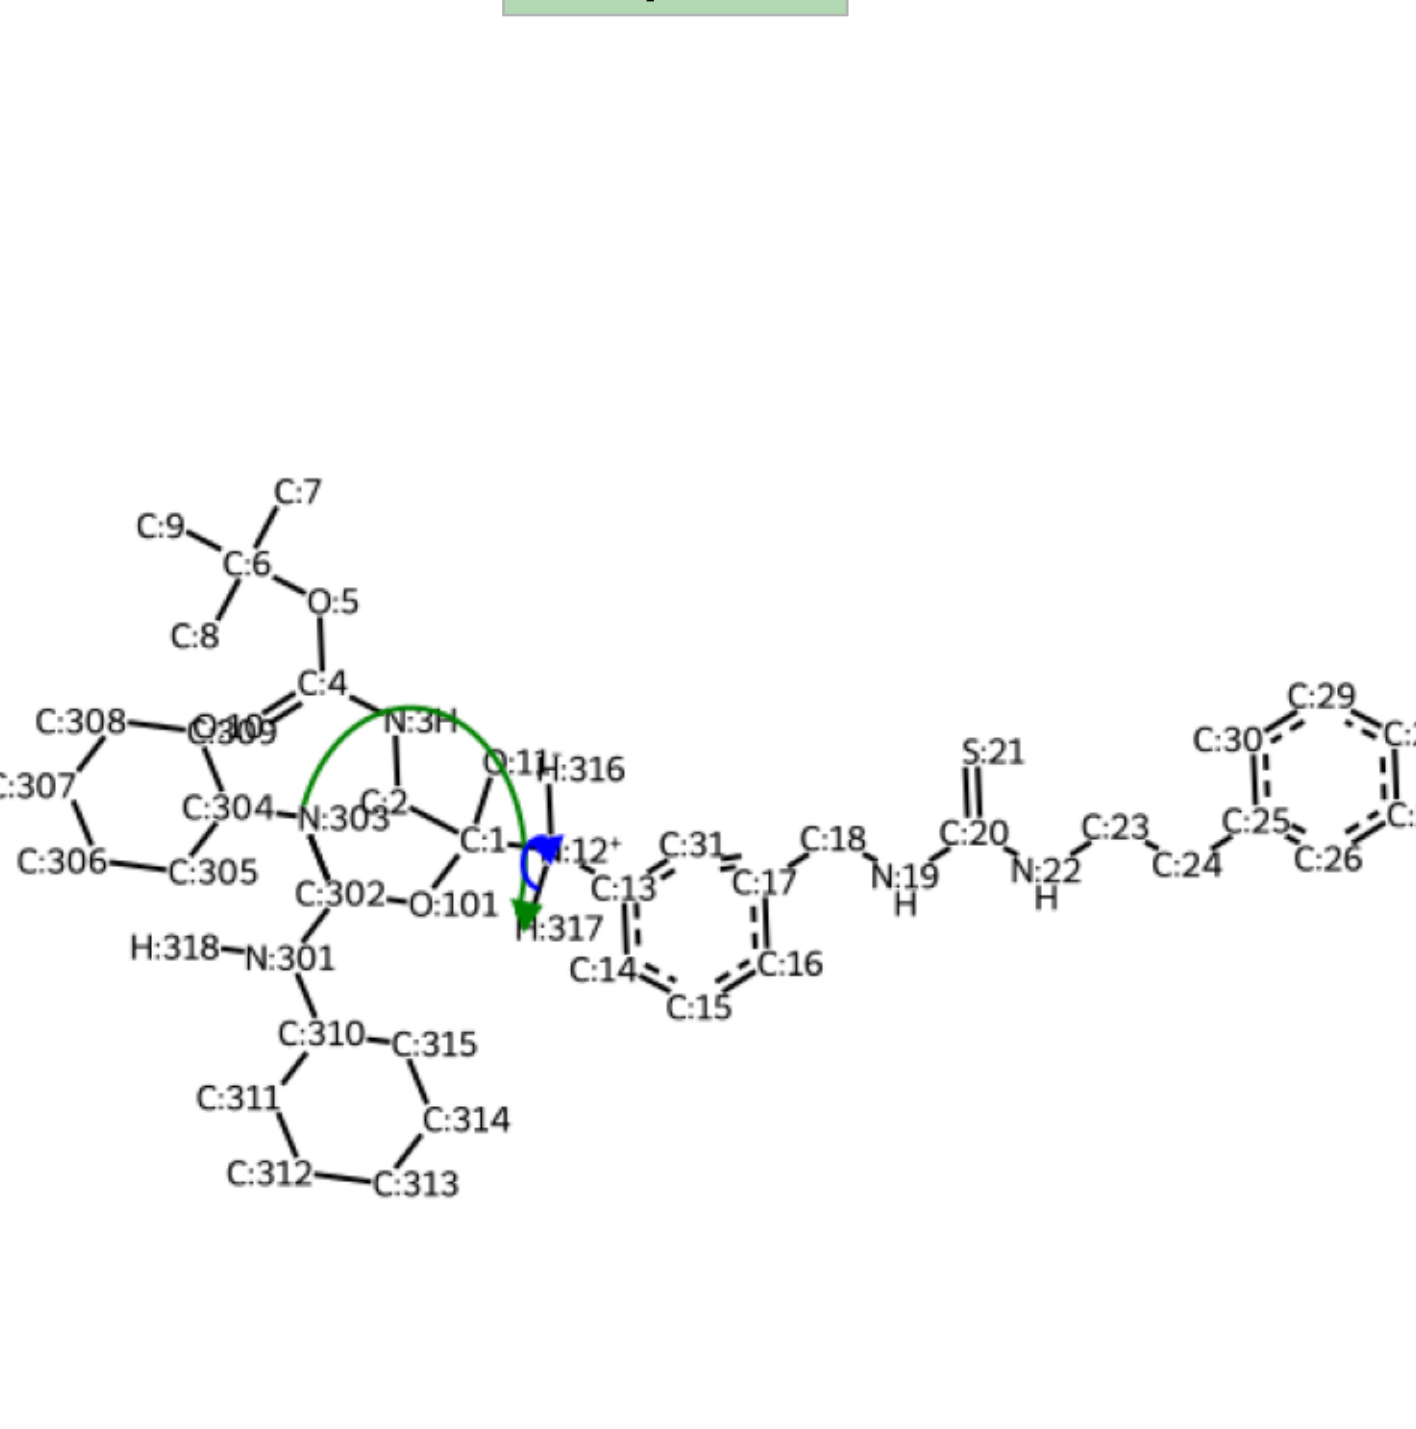

step #5

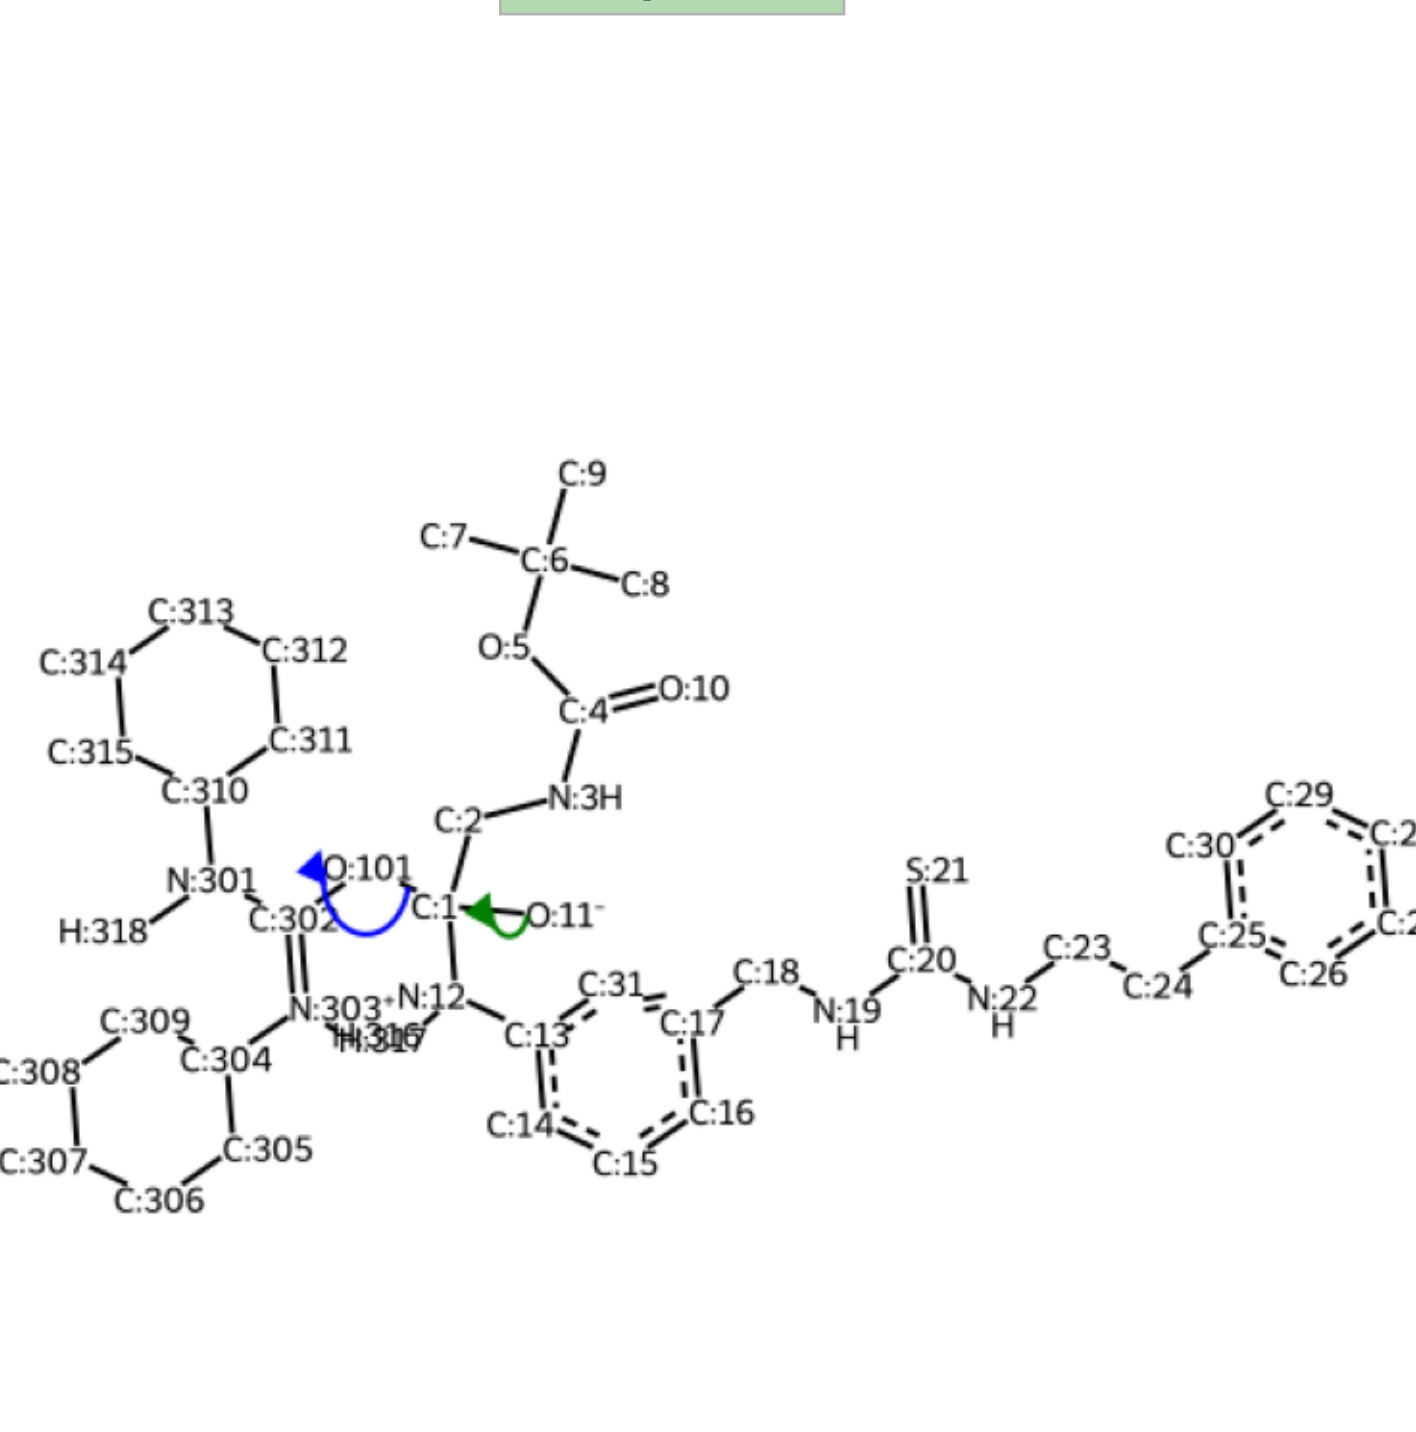

step #6

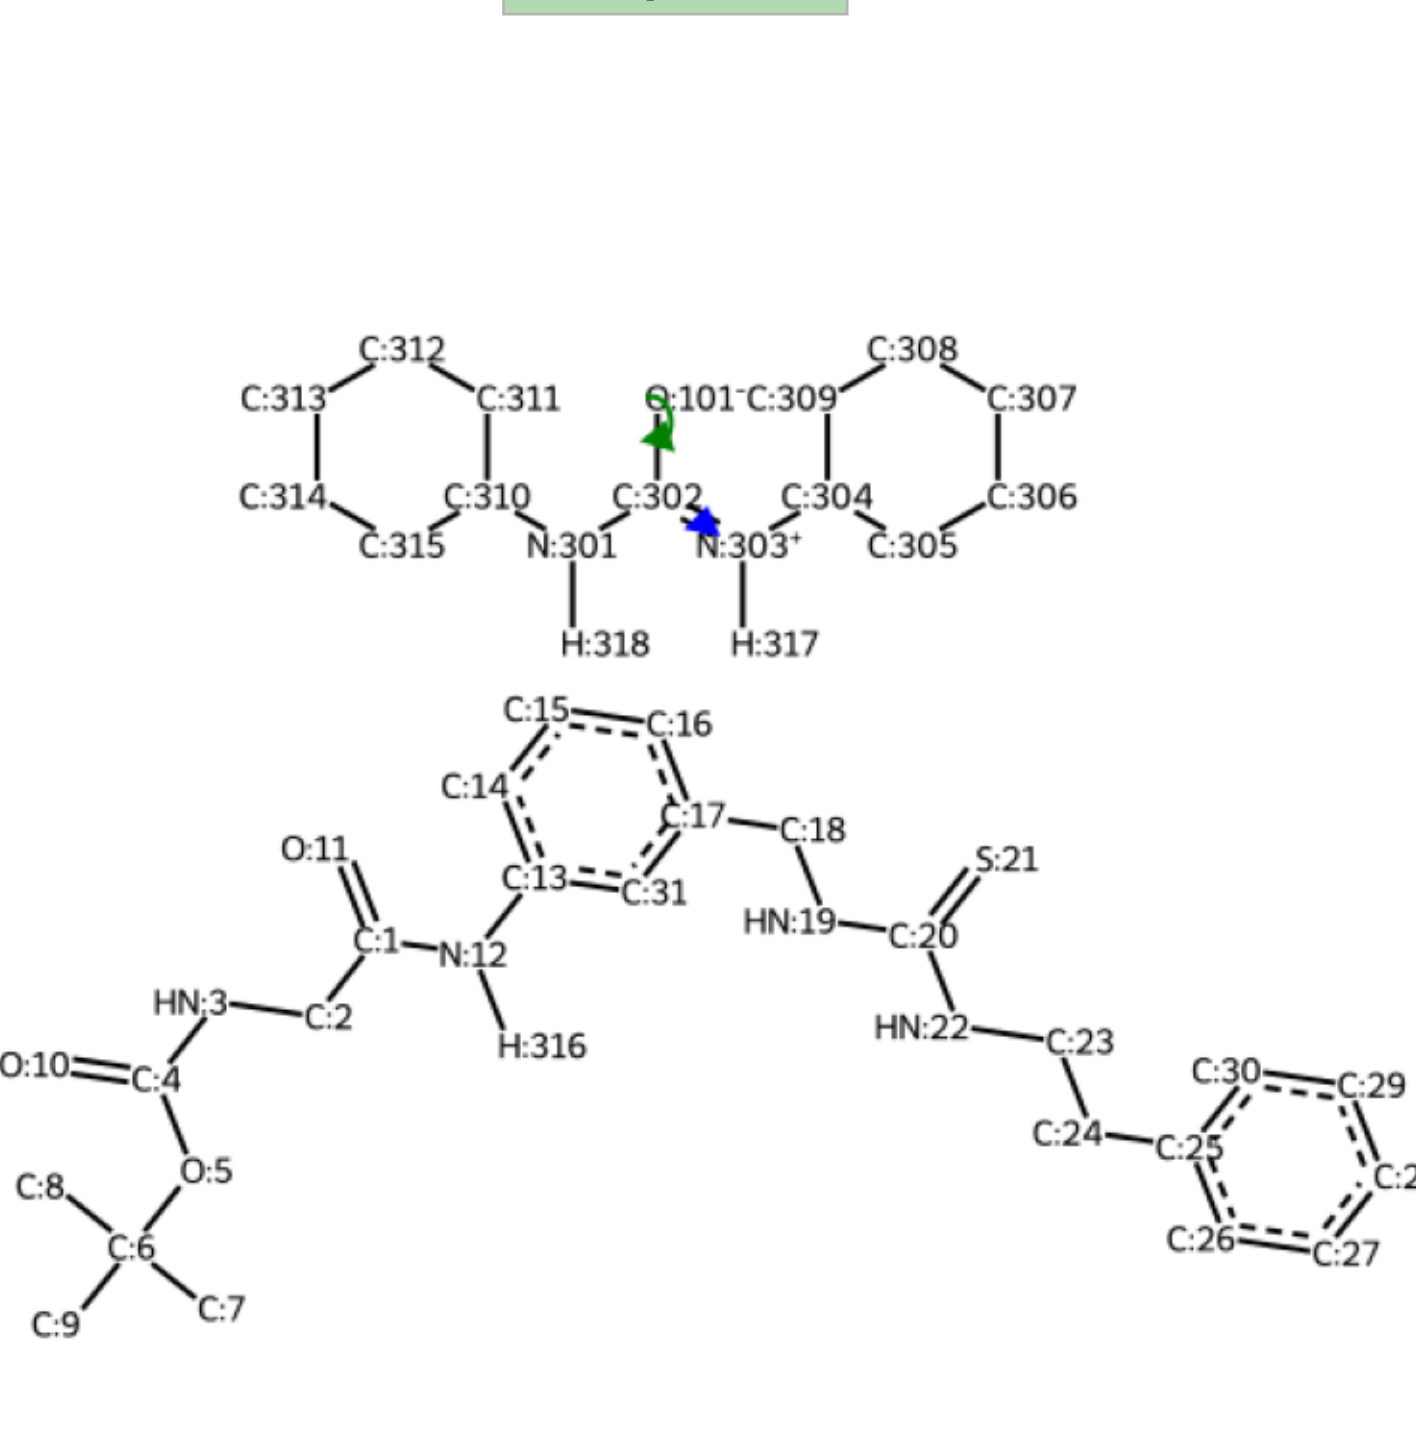

Product(s)

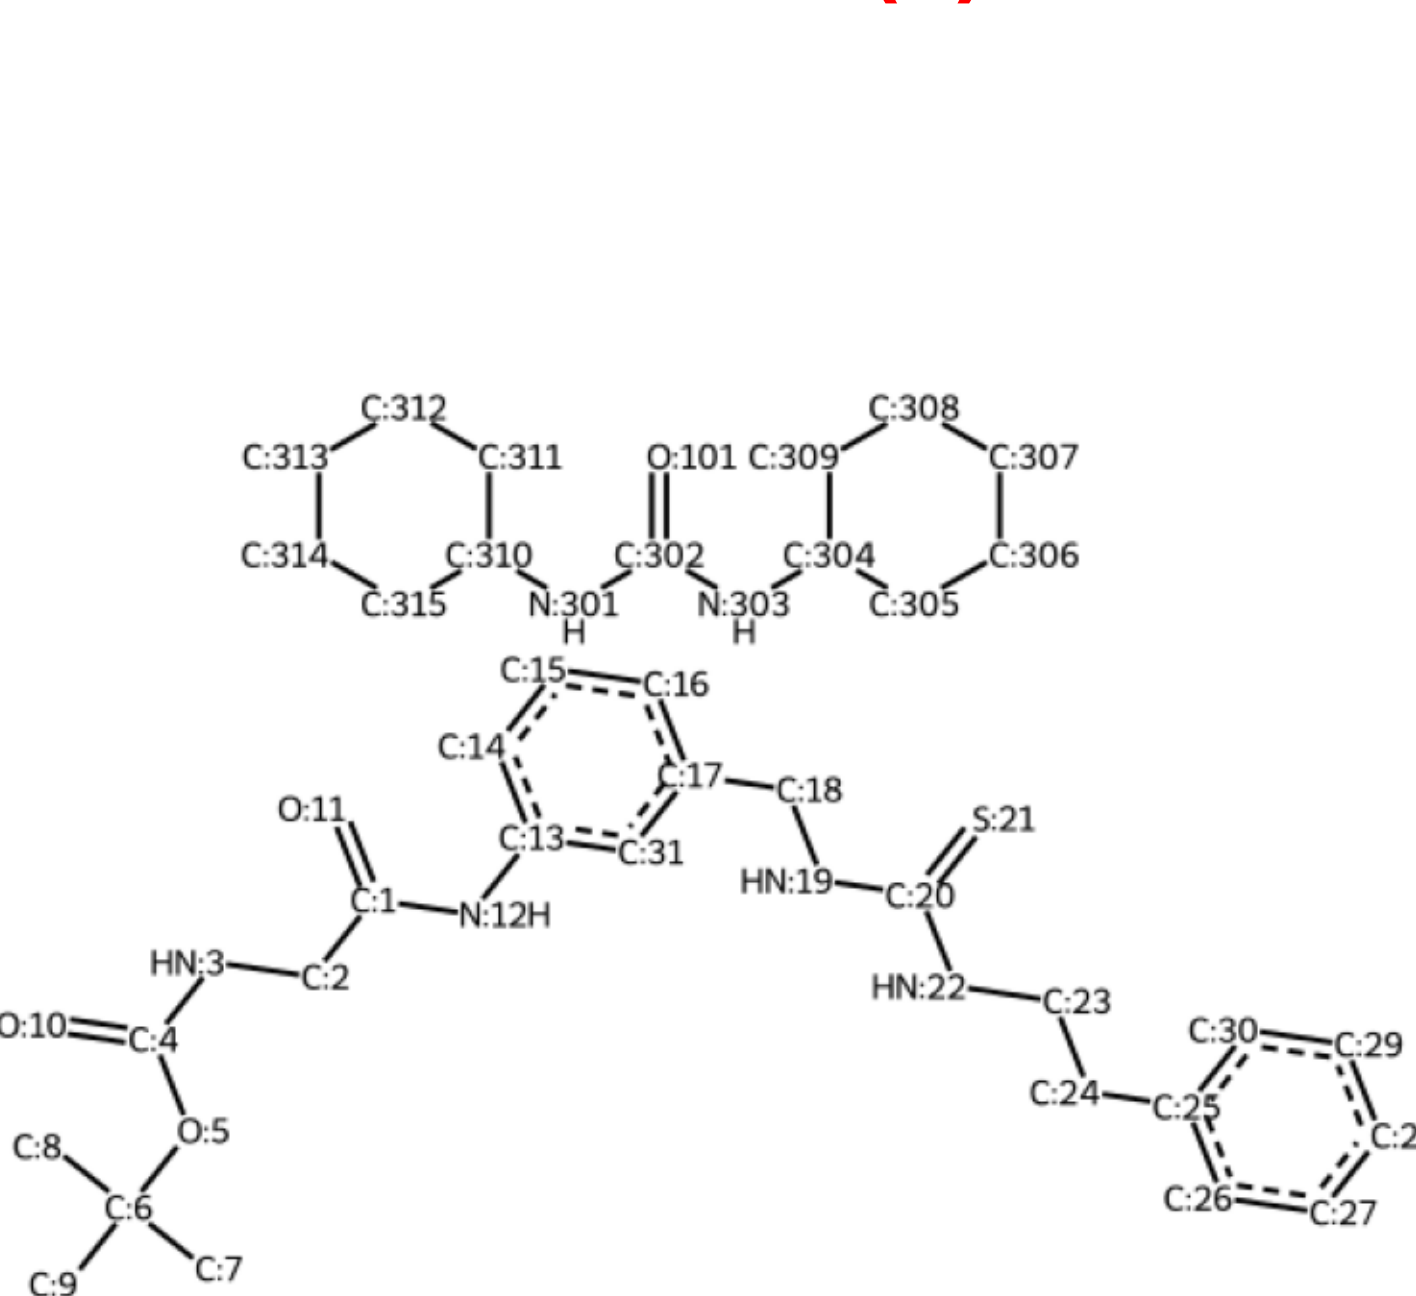



Original reaction  
sampled RXN\_ID:38)

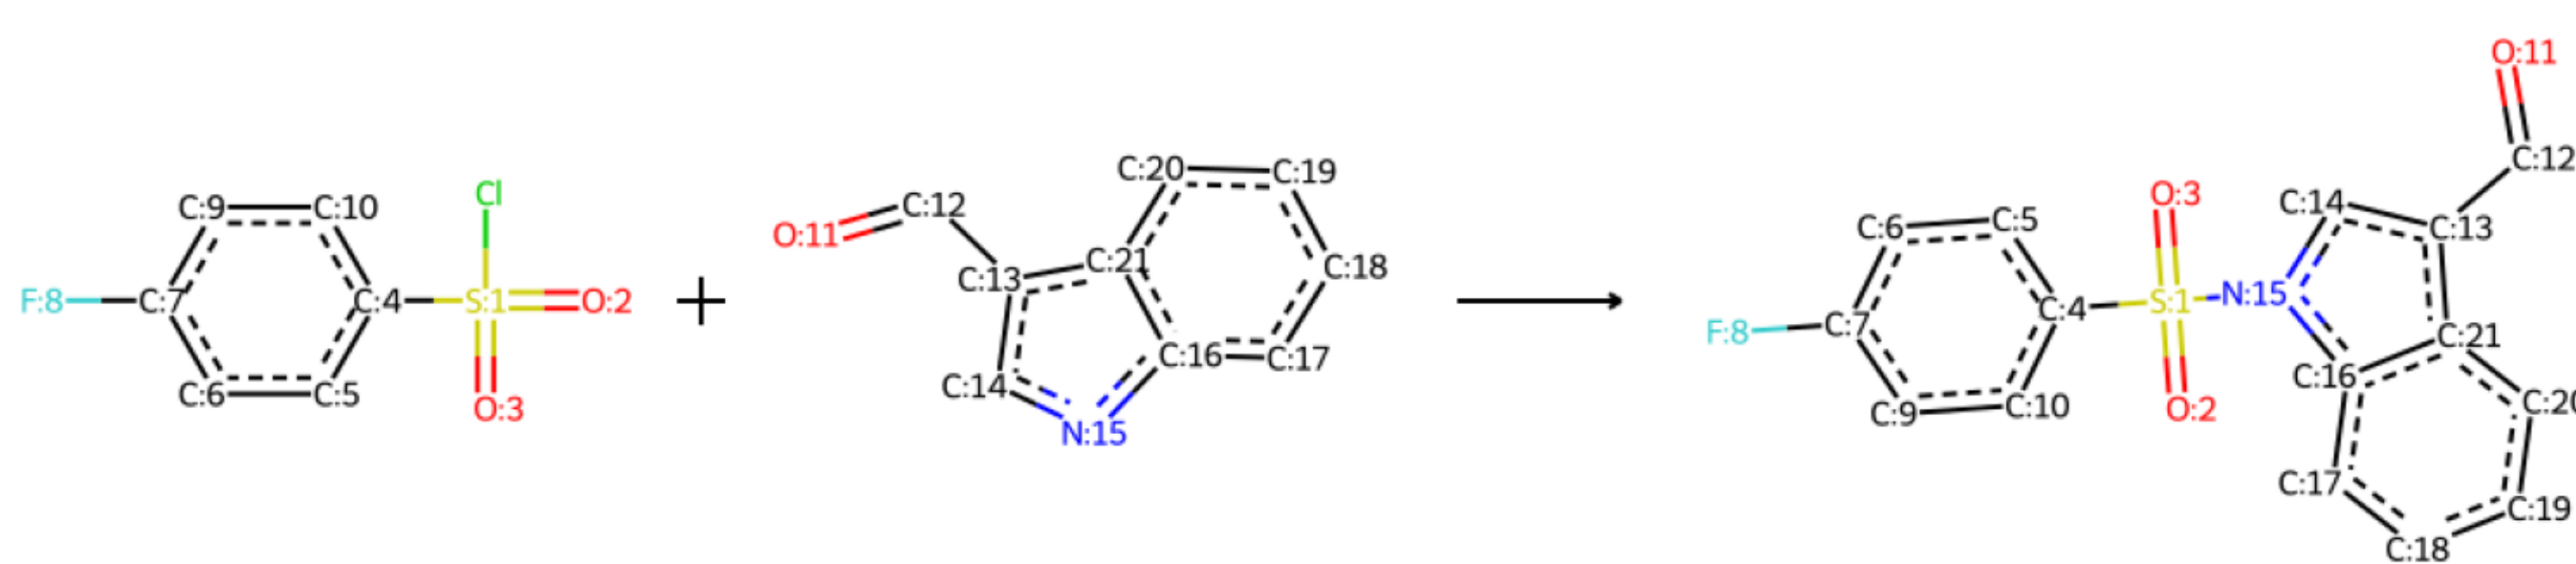

Identified mechanistic class -  
nucleophilic\_attack\_to\_(thio)carbonyl\_or\_sulfonyl reaction

Reaction with missing reagents recovered

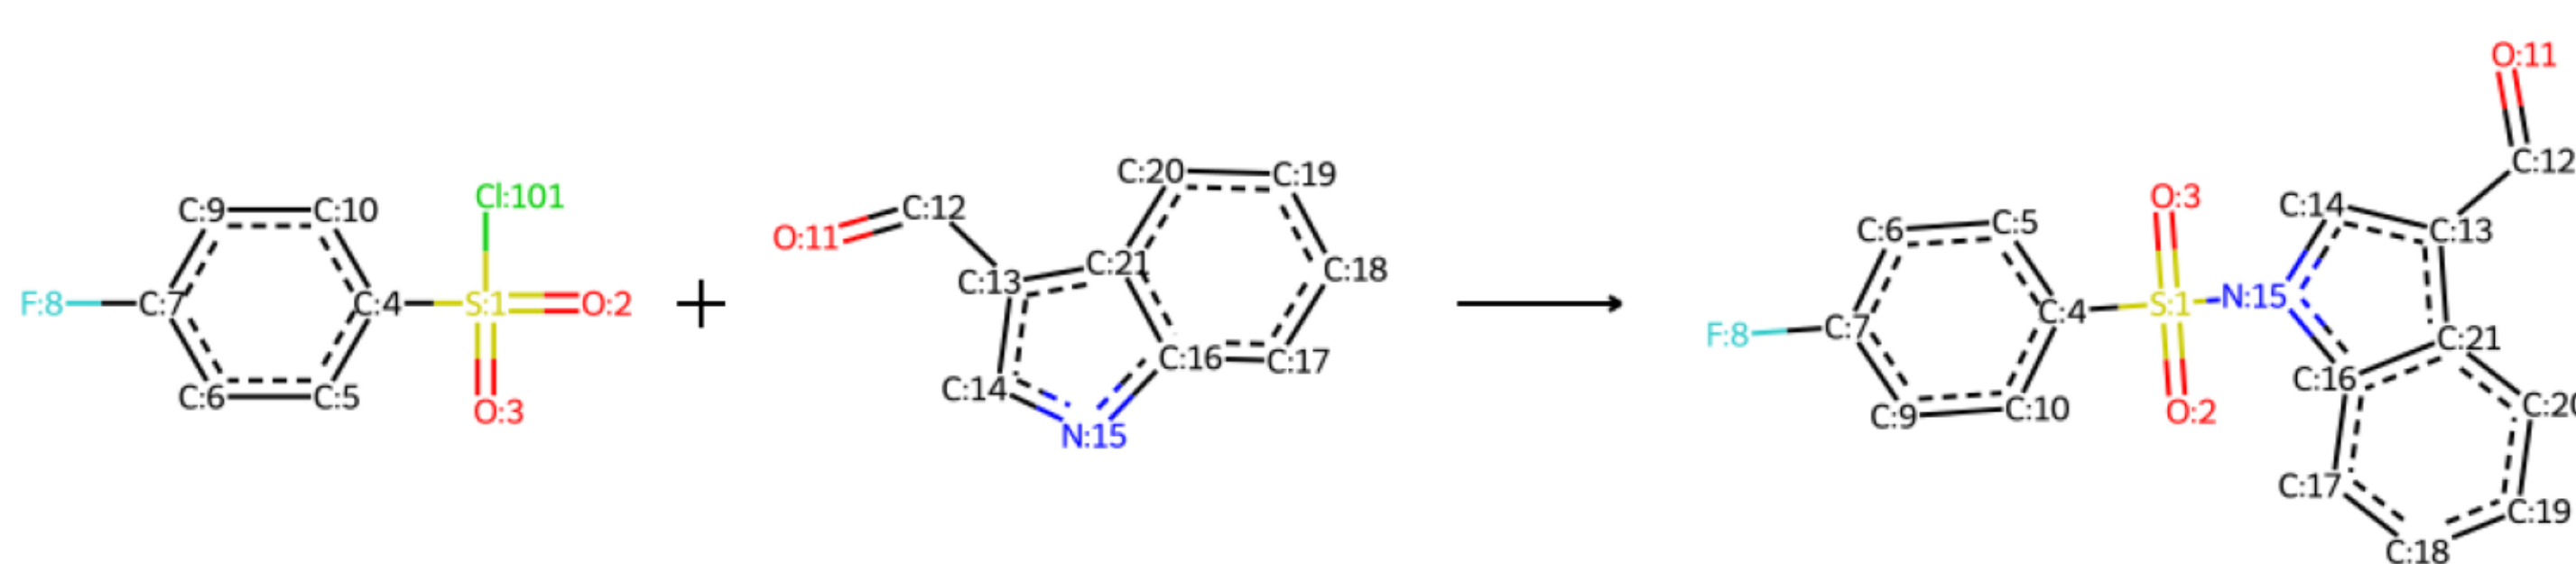

Proposed mechanistic pathway

[Arrow order: (1) green, (2) blue, (3) red, (4) orange]

step #1

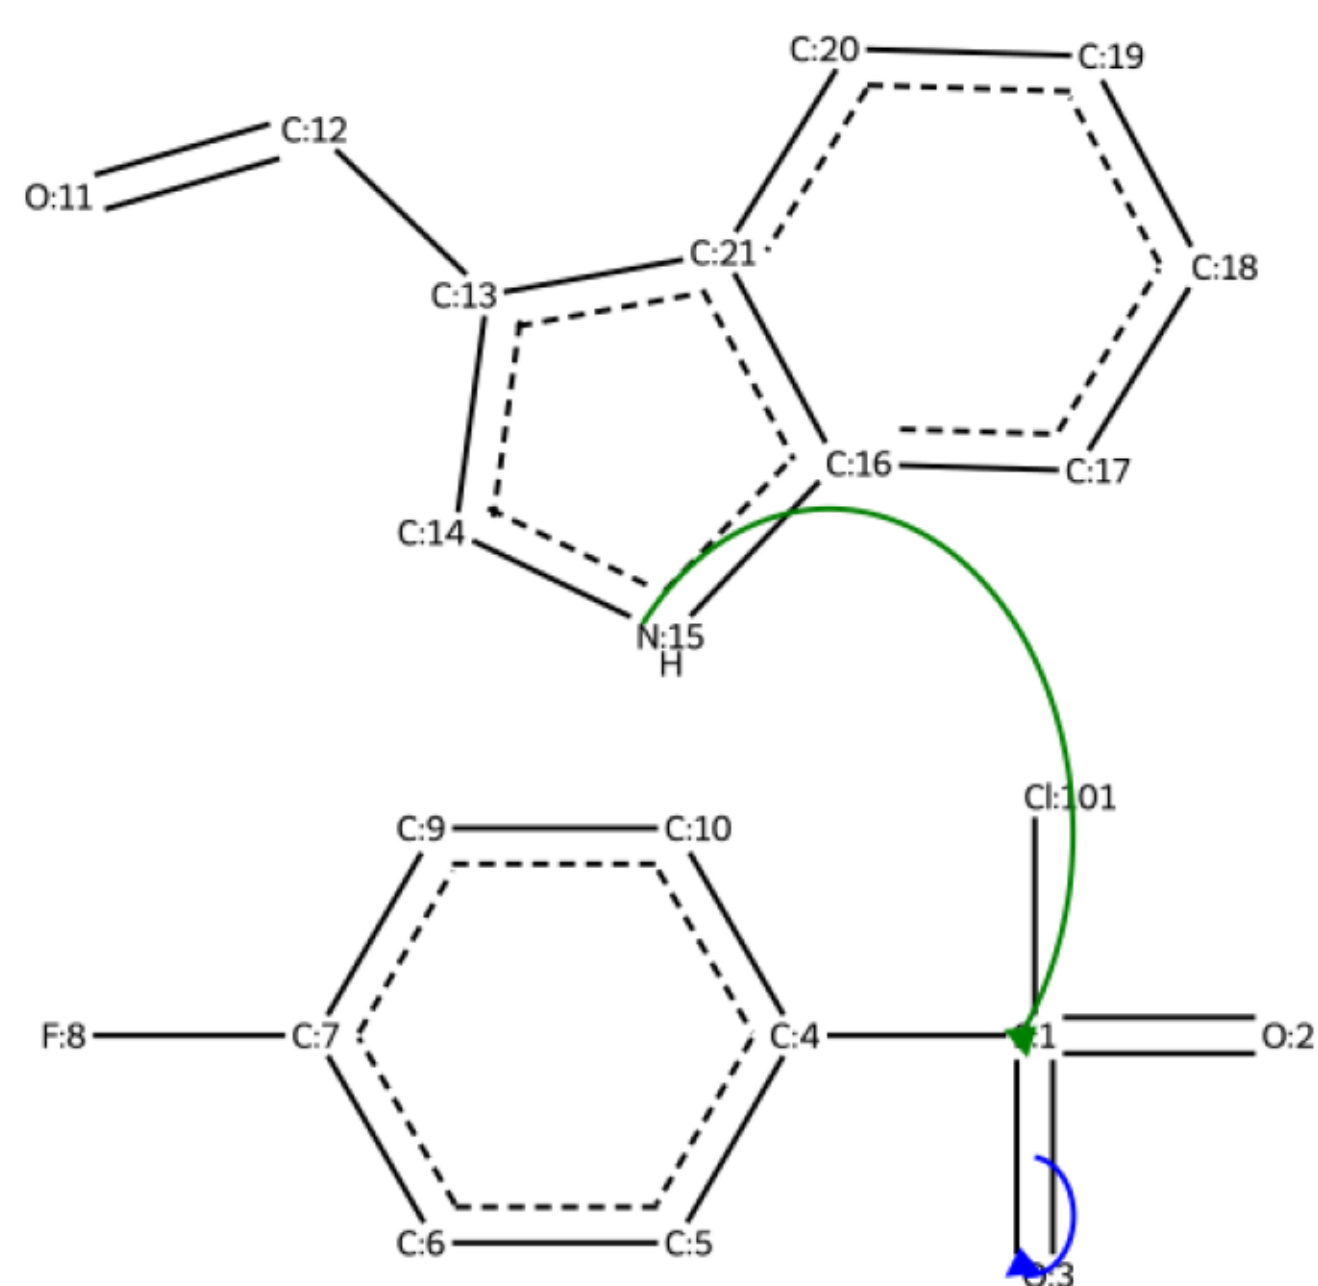

step #2

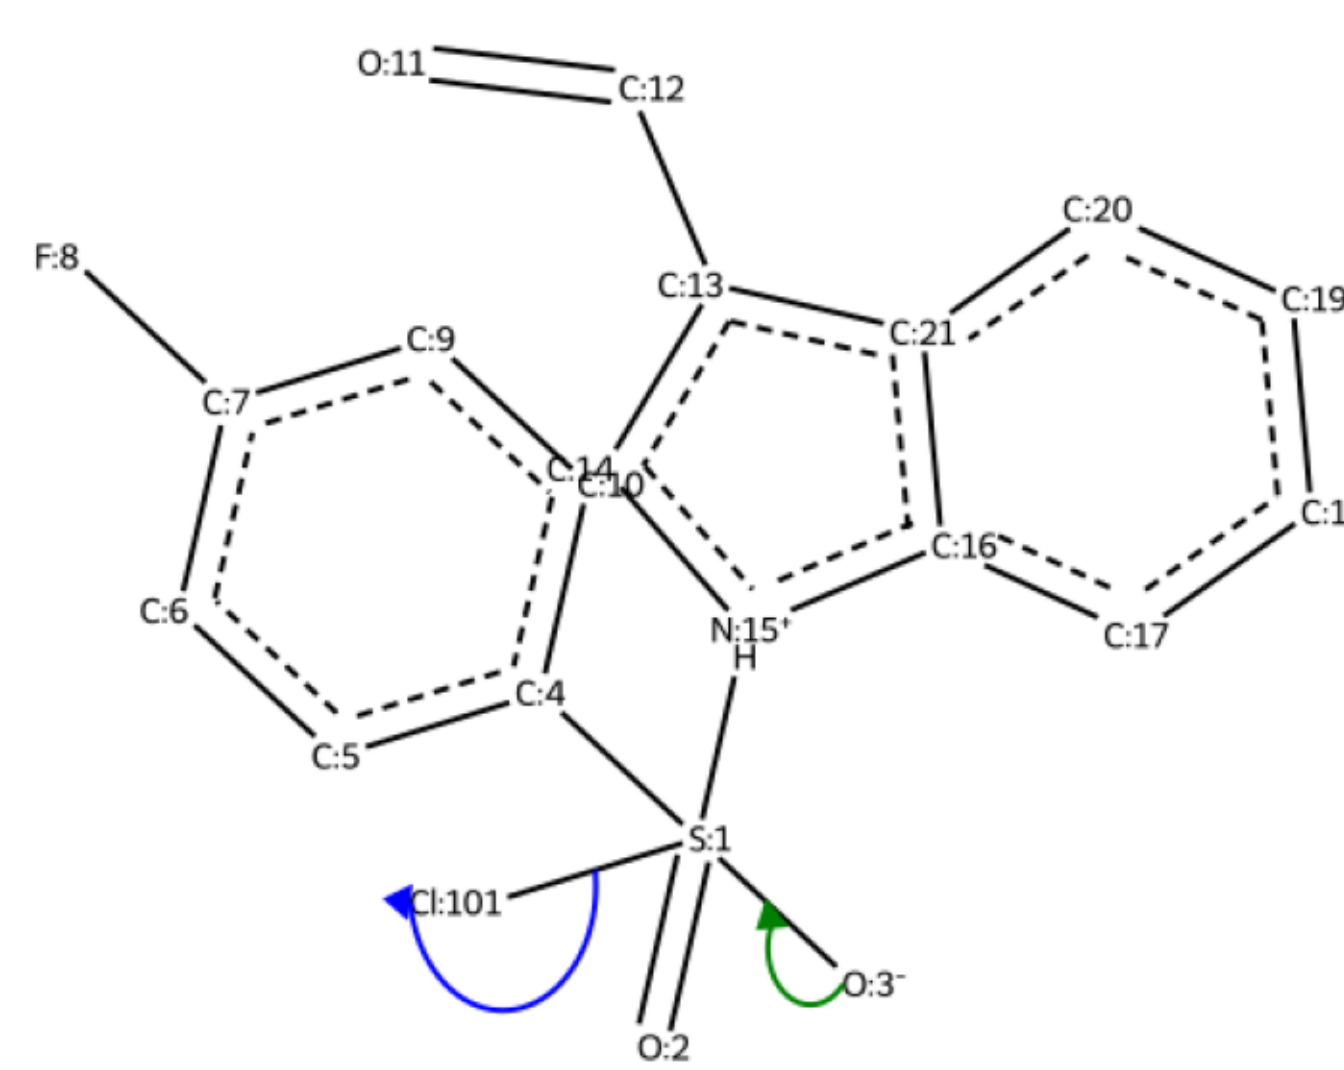

Product(s)

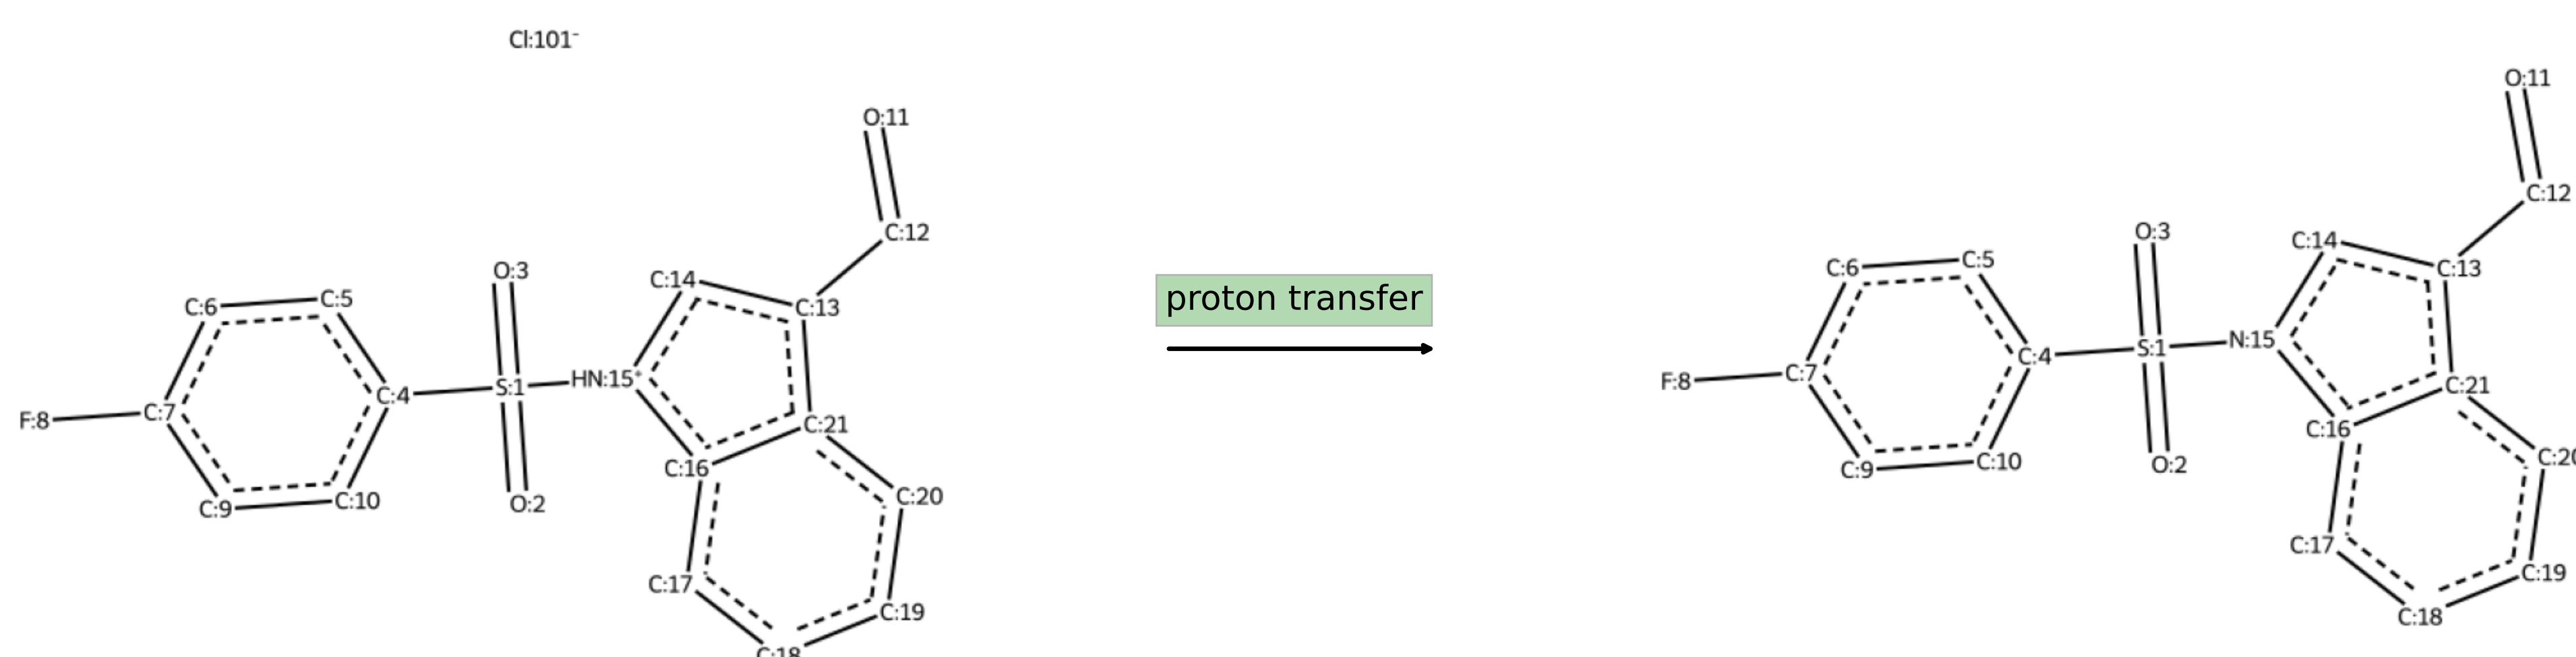



# Original reaction sampled RXN\_ID:39)

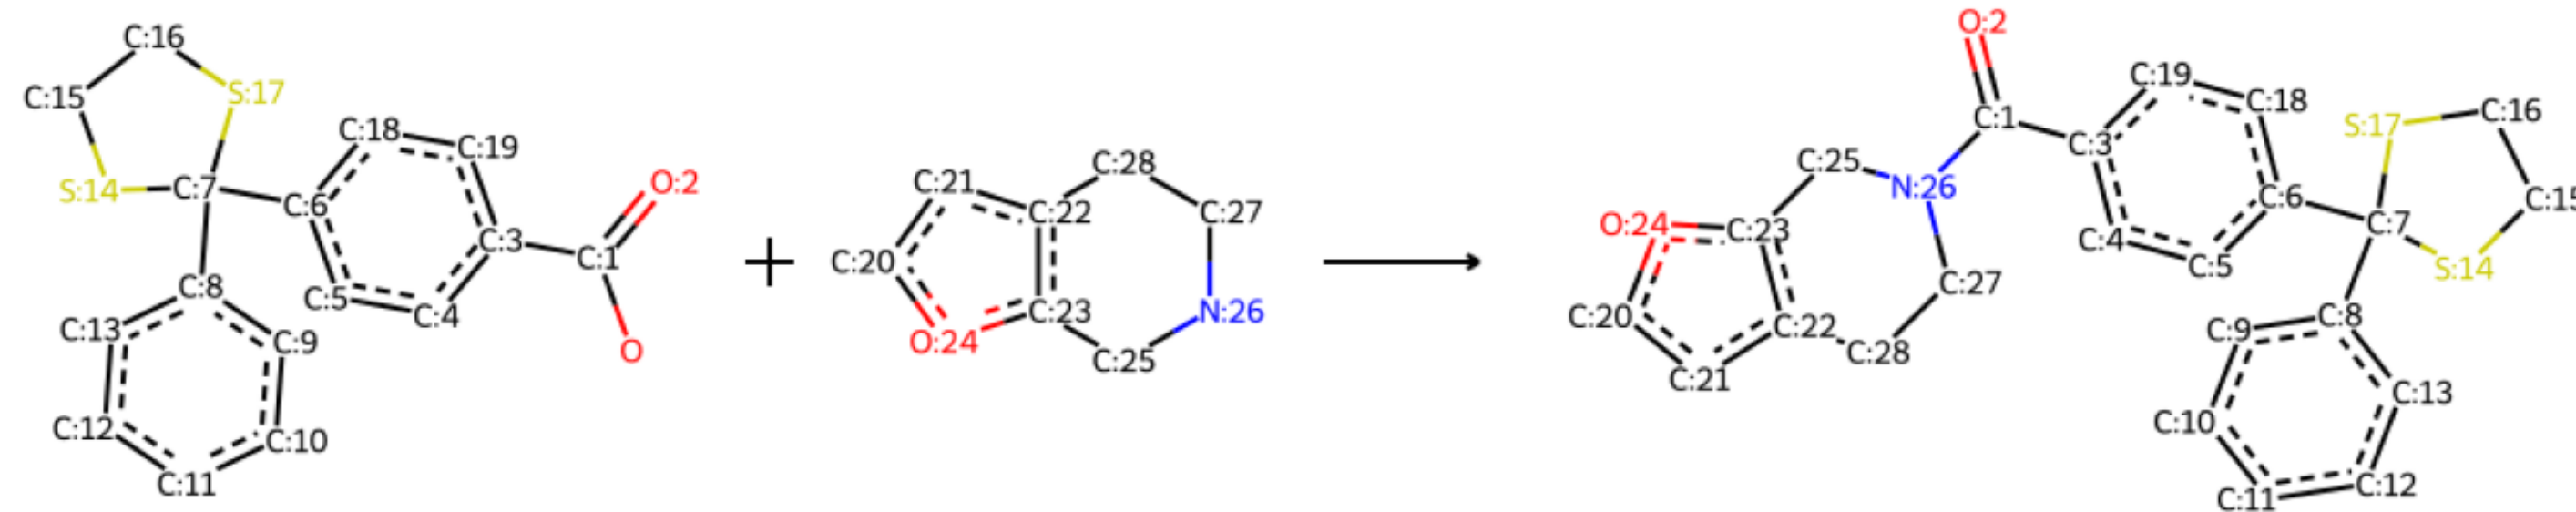

Identified mechanistic class -  
DCC\_condensation reaction

## Reaction with missing reagents recovered

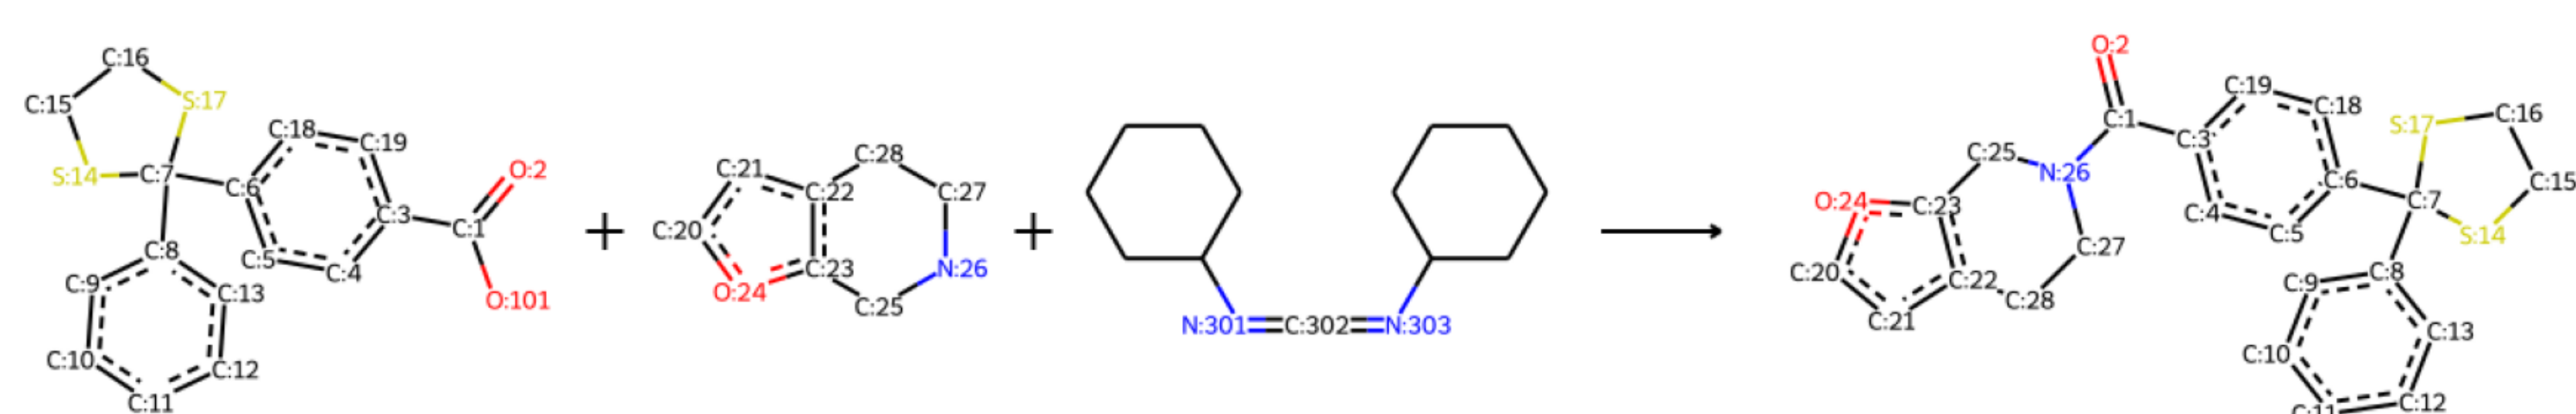

## Proposed mechanistic pathway

[Arrow order: (1) green, (2) blue, (3) red, (4) orange]

step #1

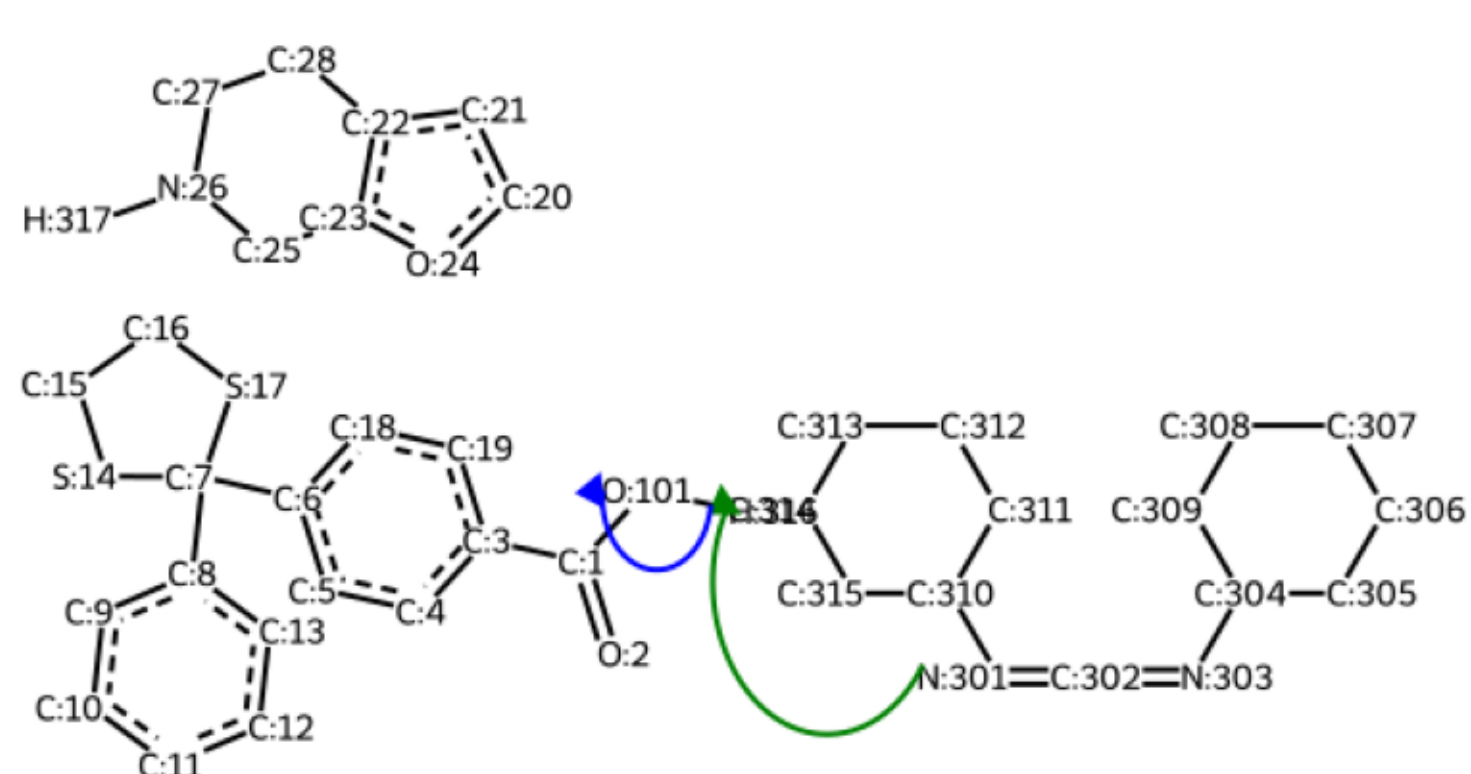

step #2

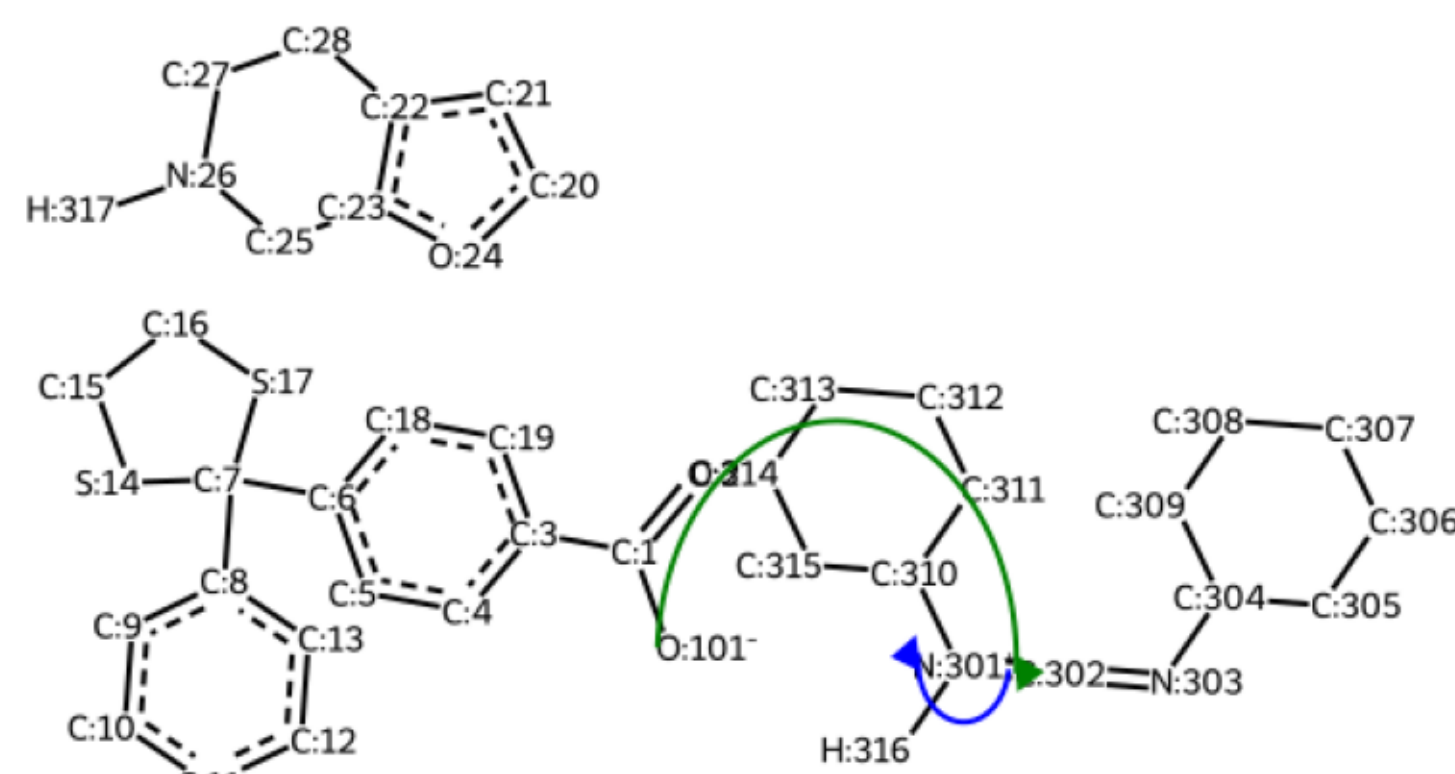

step #3

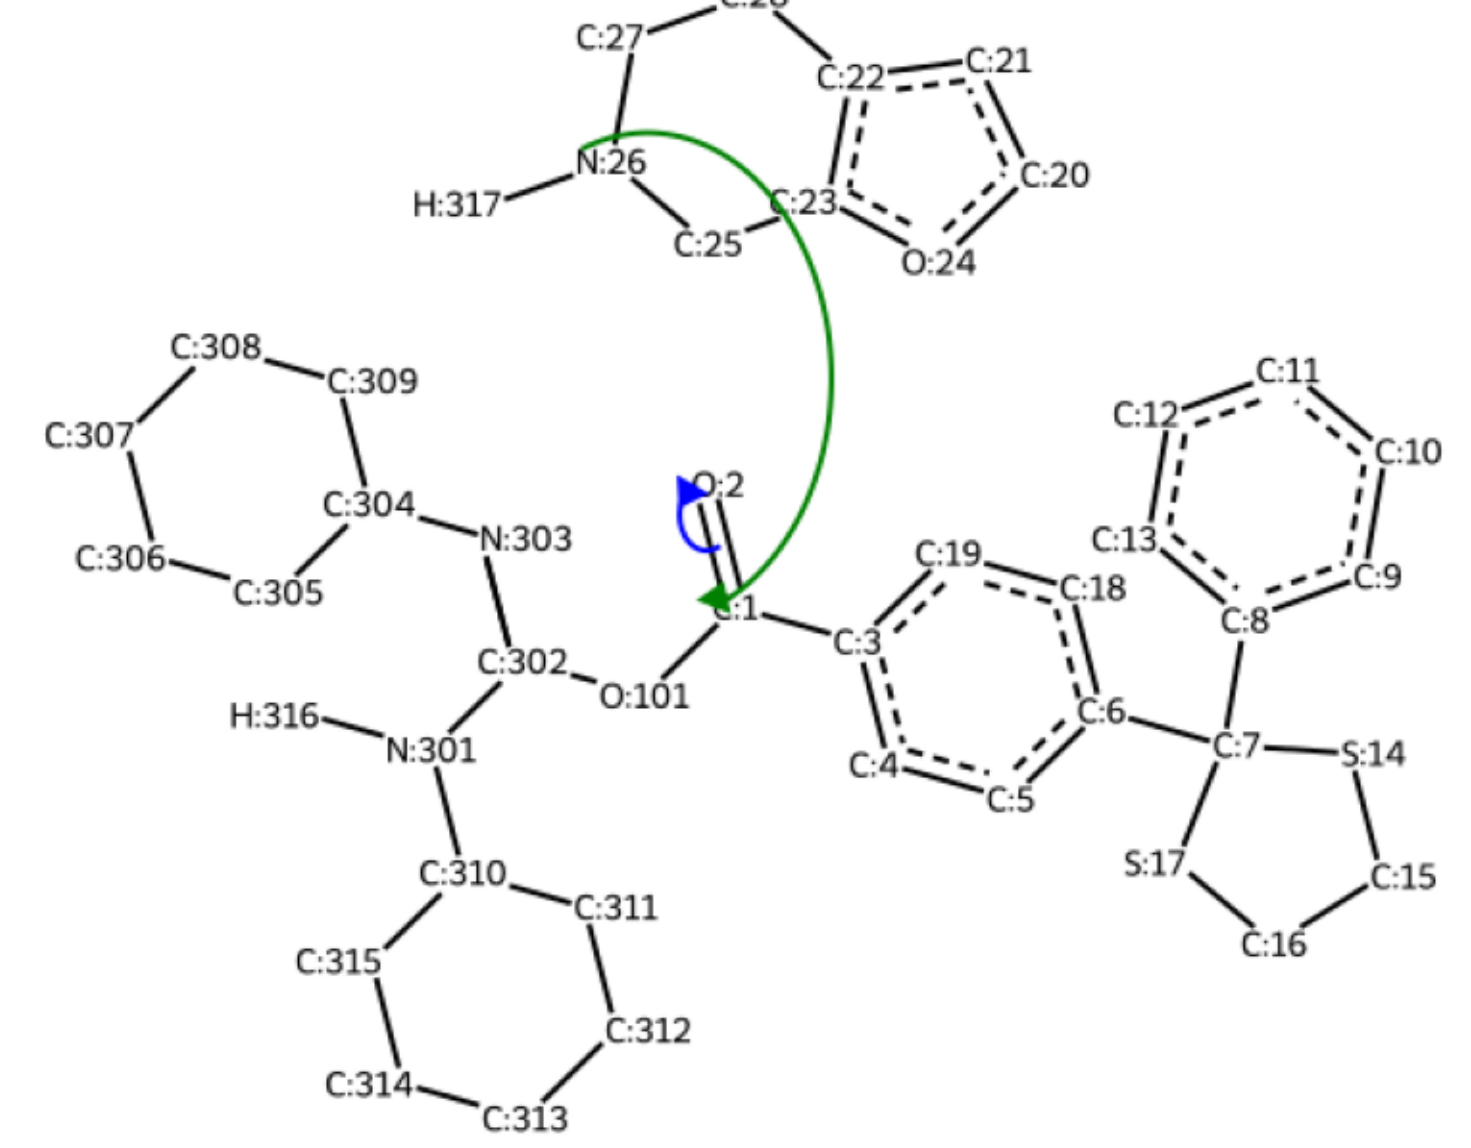

step #4

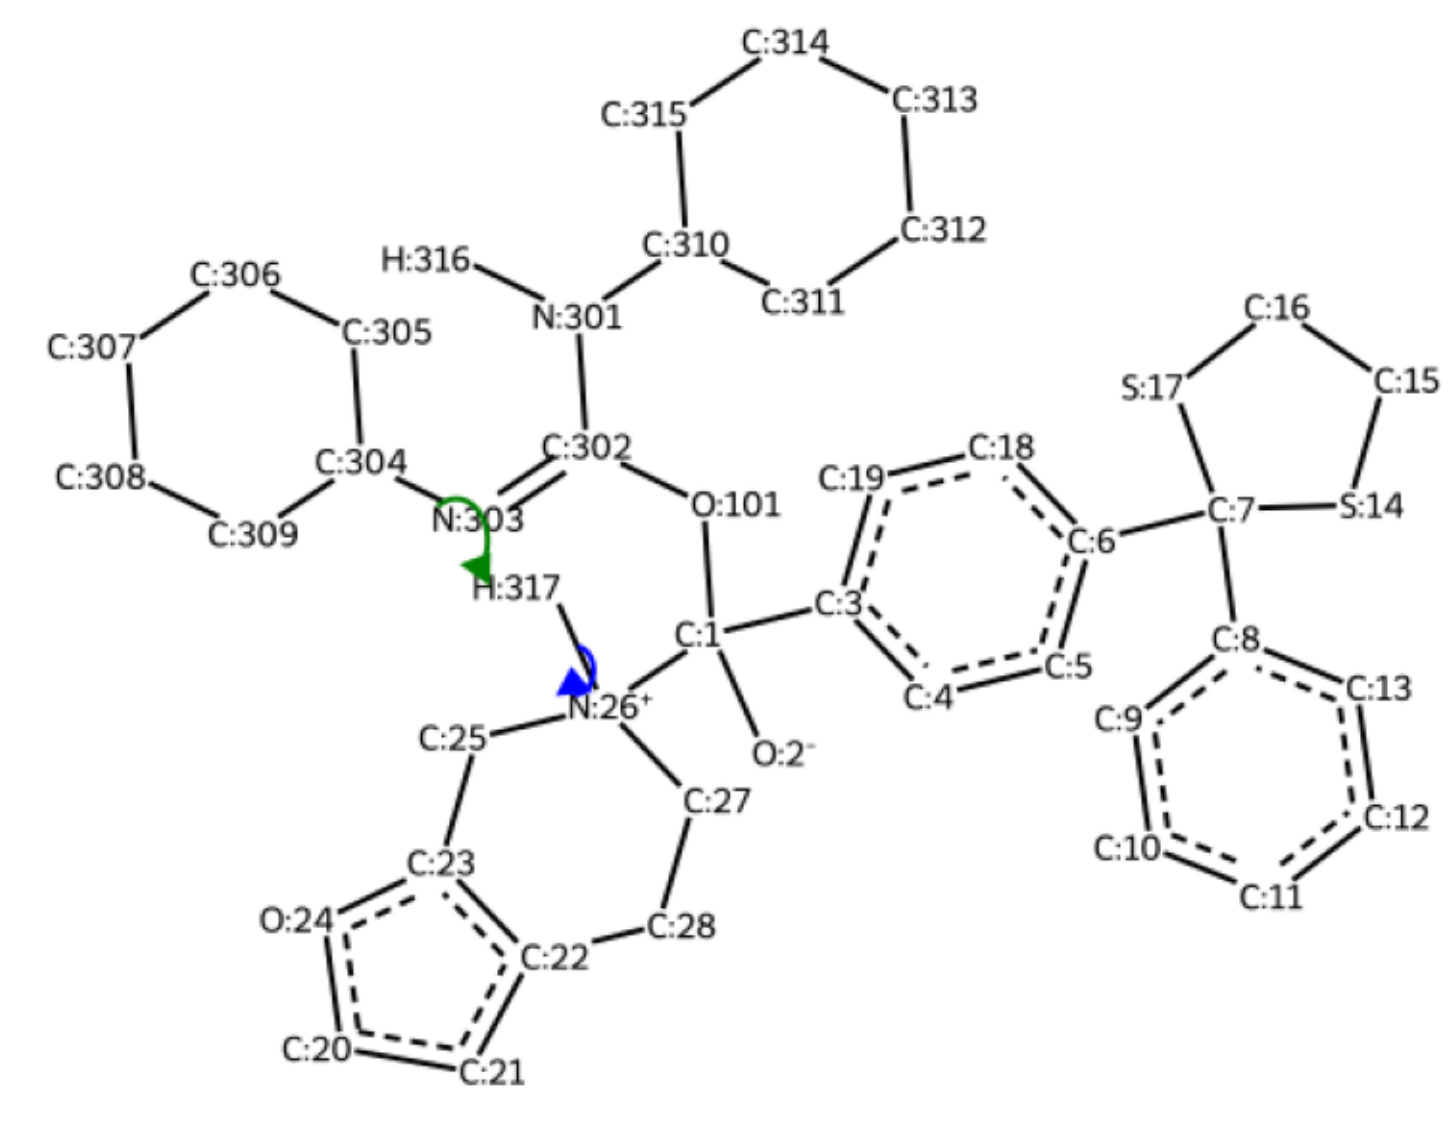

step #5

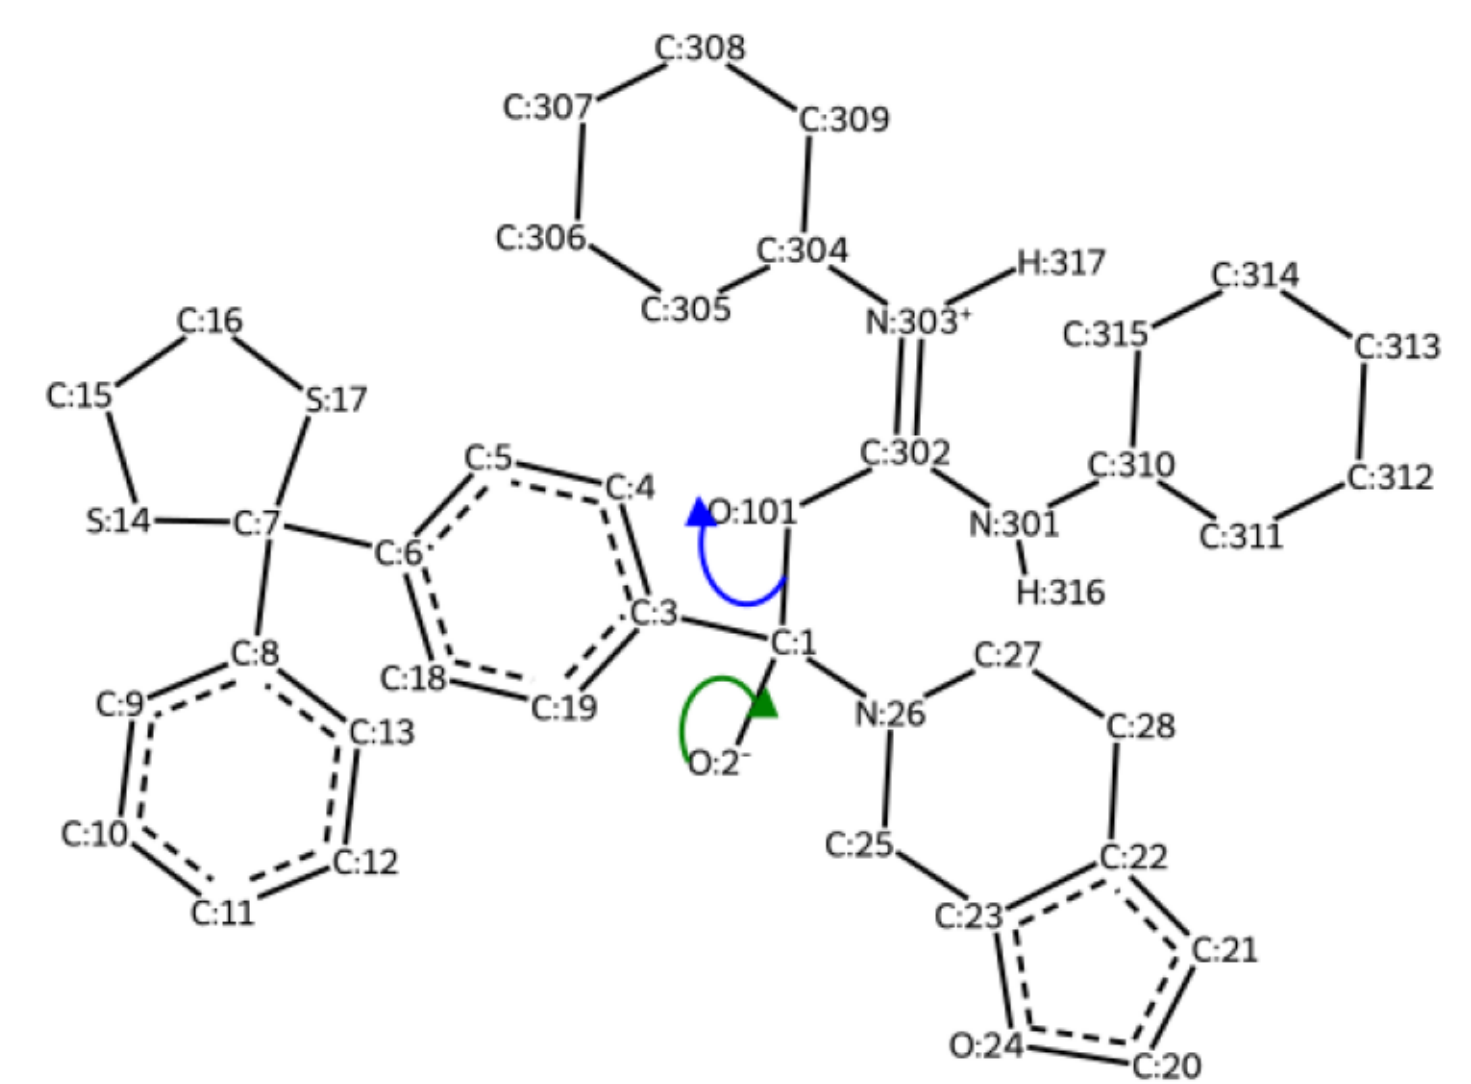

step #6

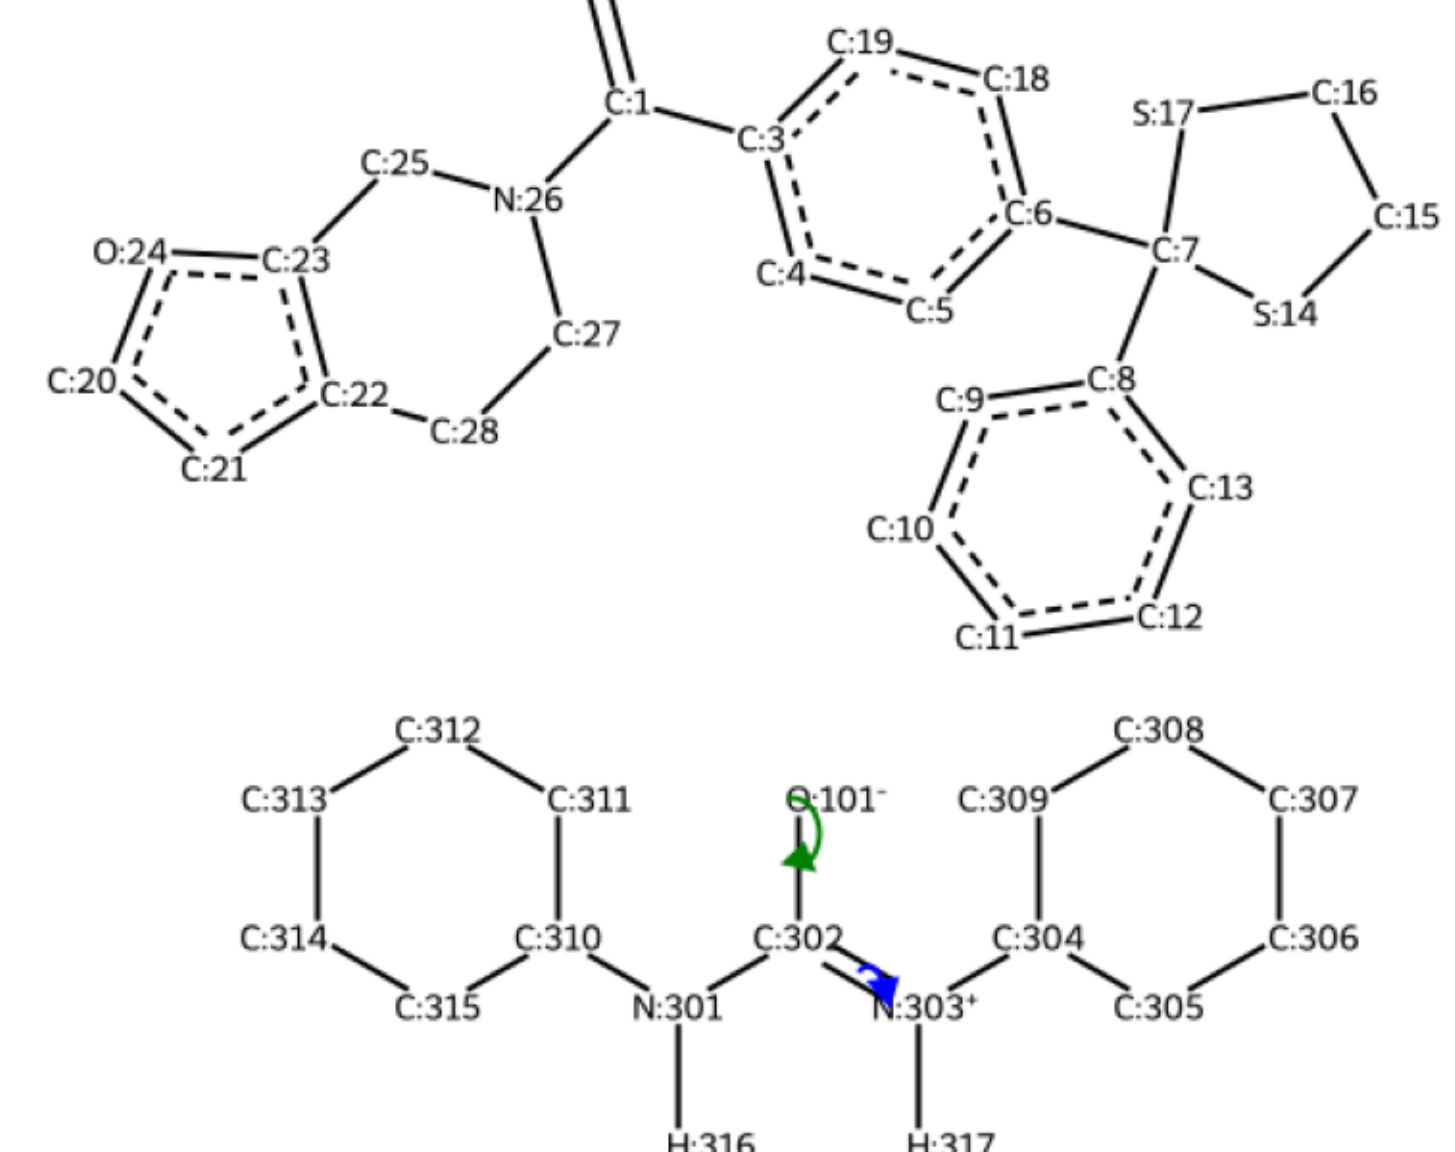

Product(s)

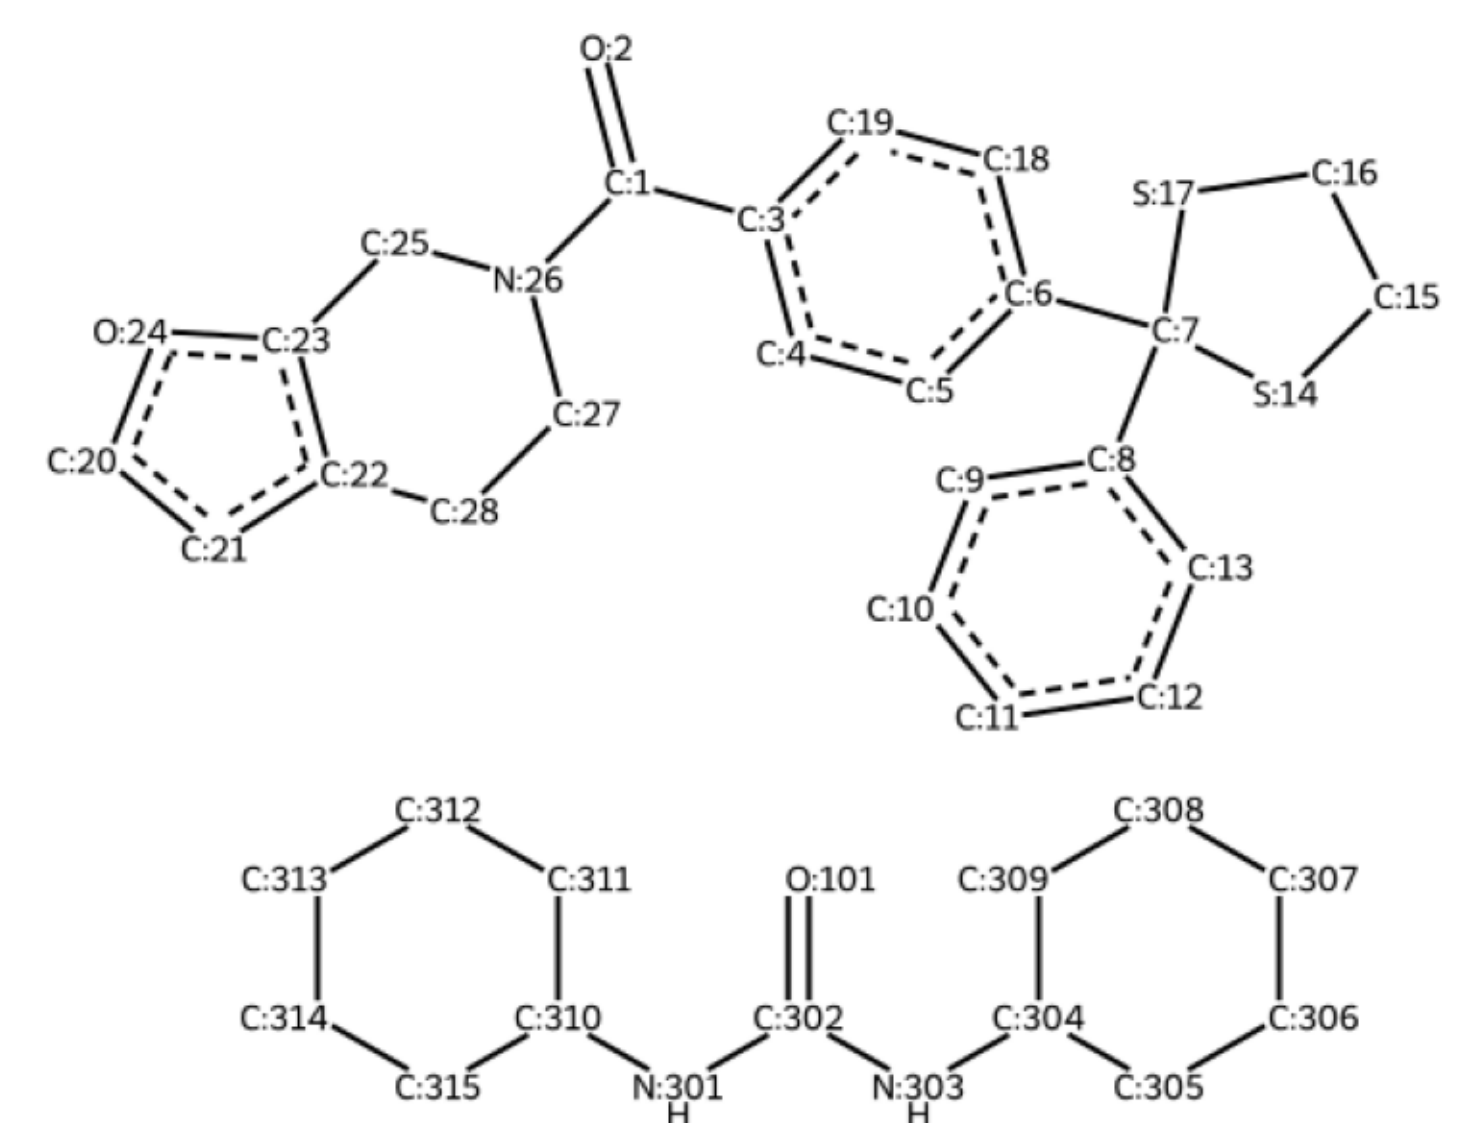



Original reaction  
sampled RXN\_ID:40)

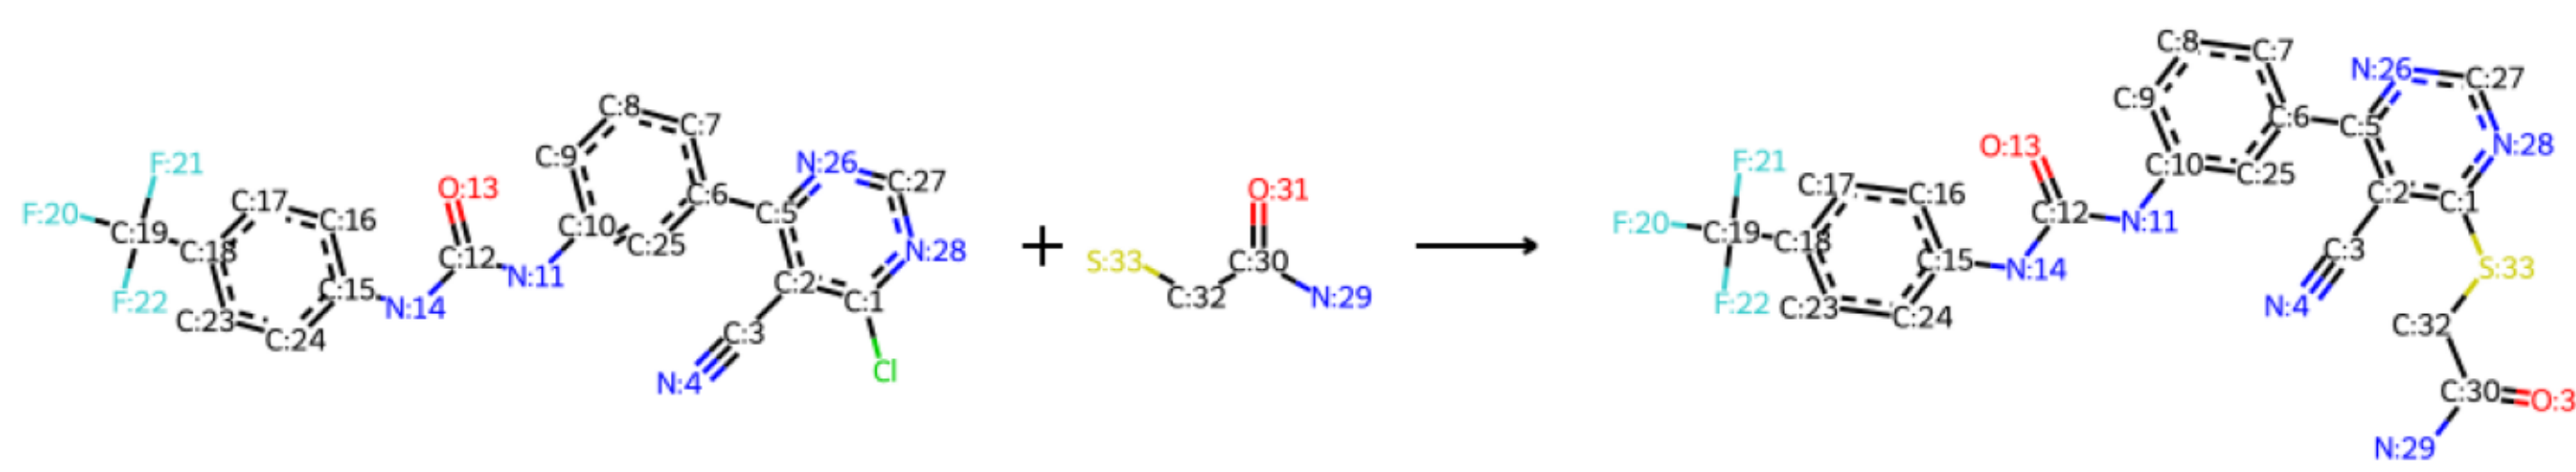

Identified mechanistic class -  
S<sub>N</sub>Ar<sub>alco</sub>(thi)ol(ortho) reaction

Reaction with missing reagents recovered

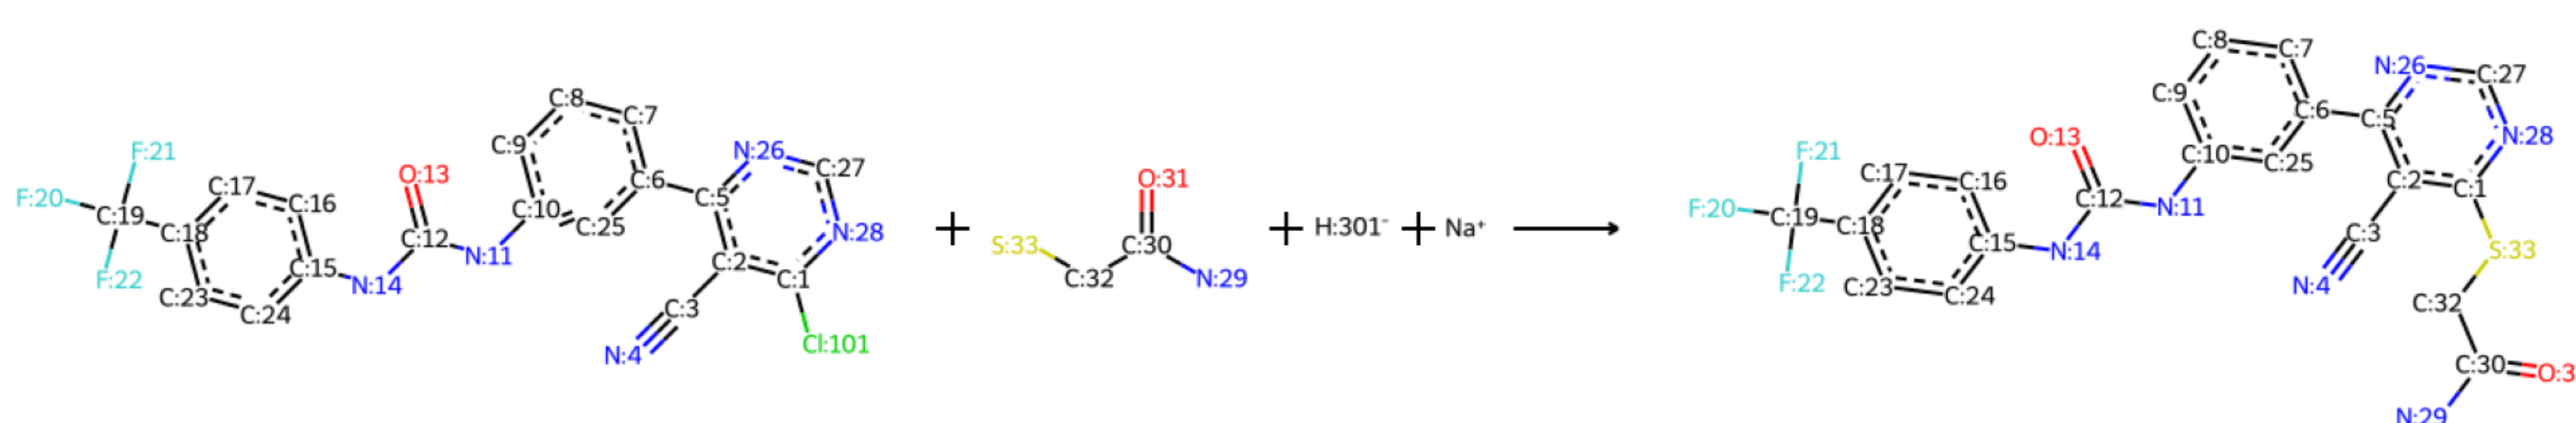

Proposed mechanistic pathway

[Arrow order: (1) green, (2) blue, (3) red, (4) orange]

step #1

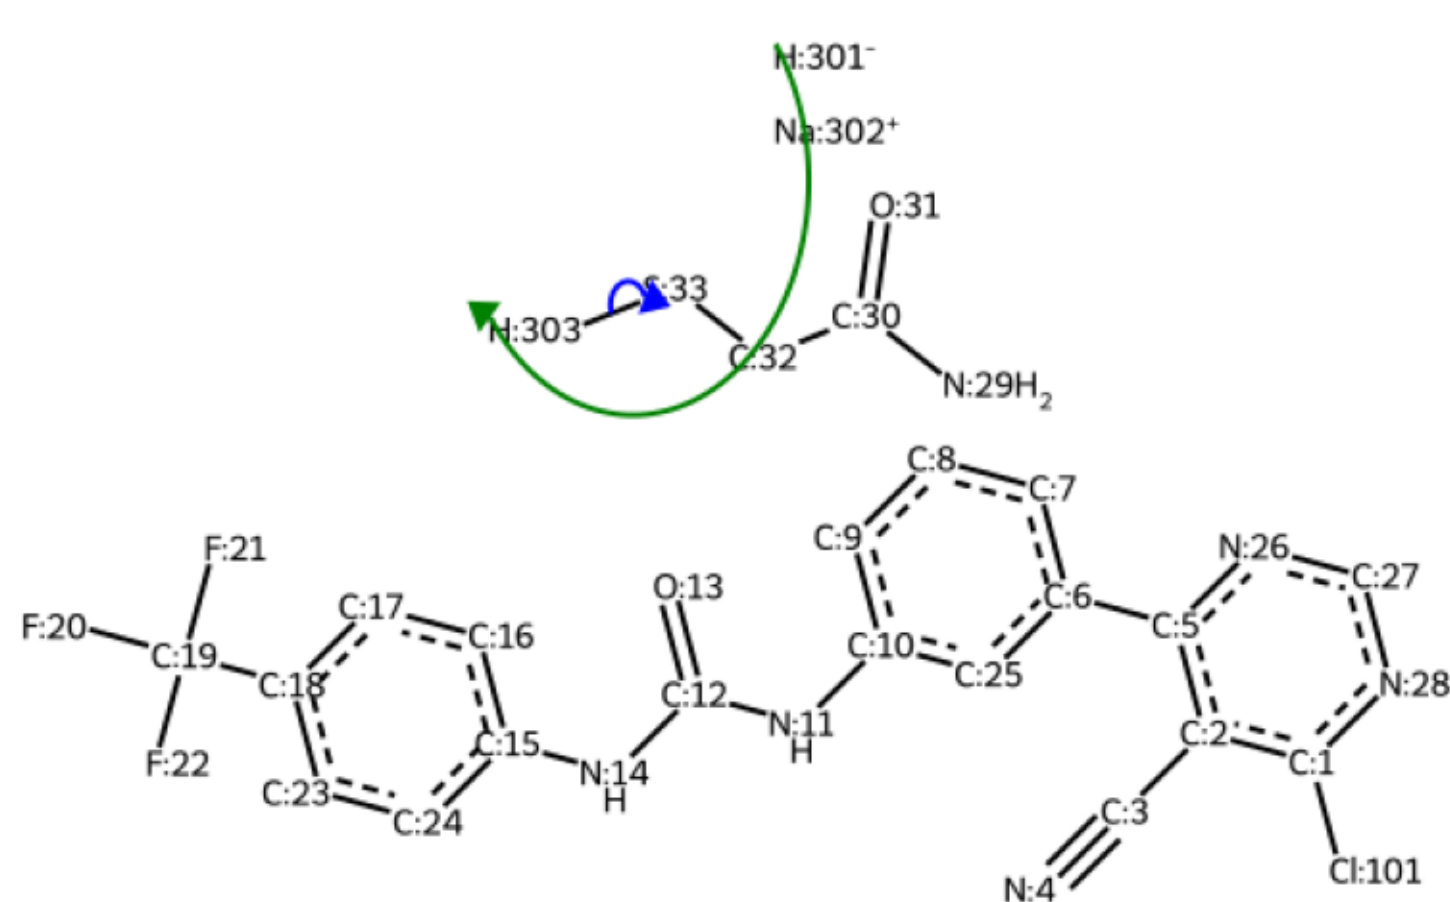

step #2

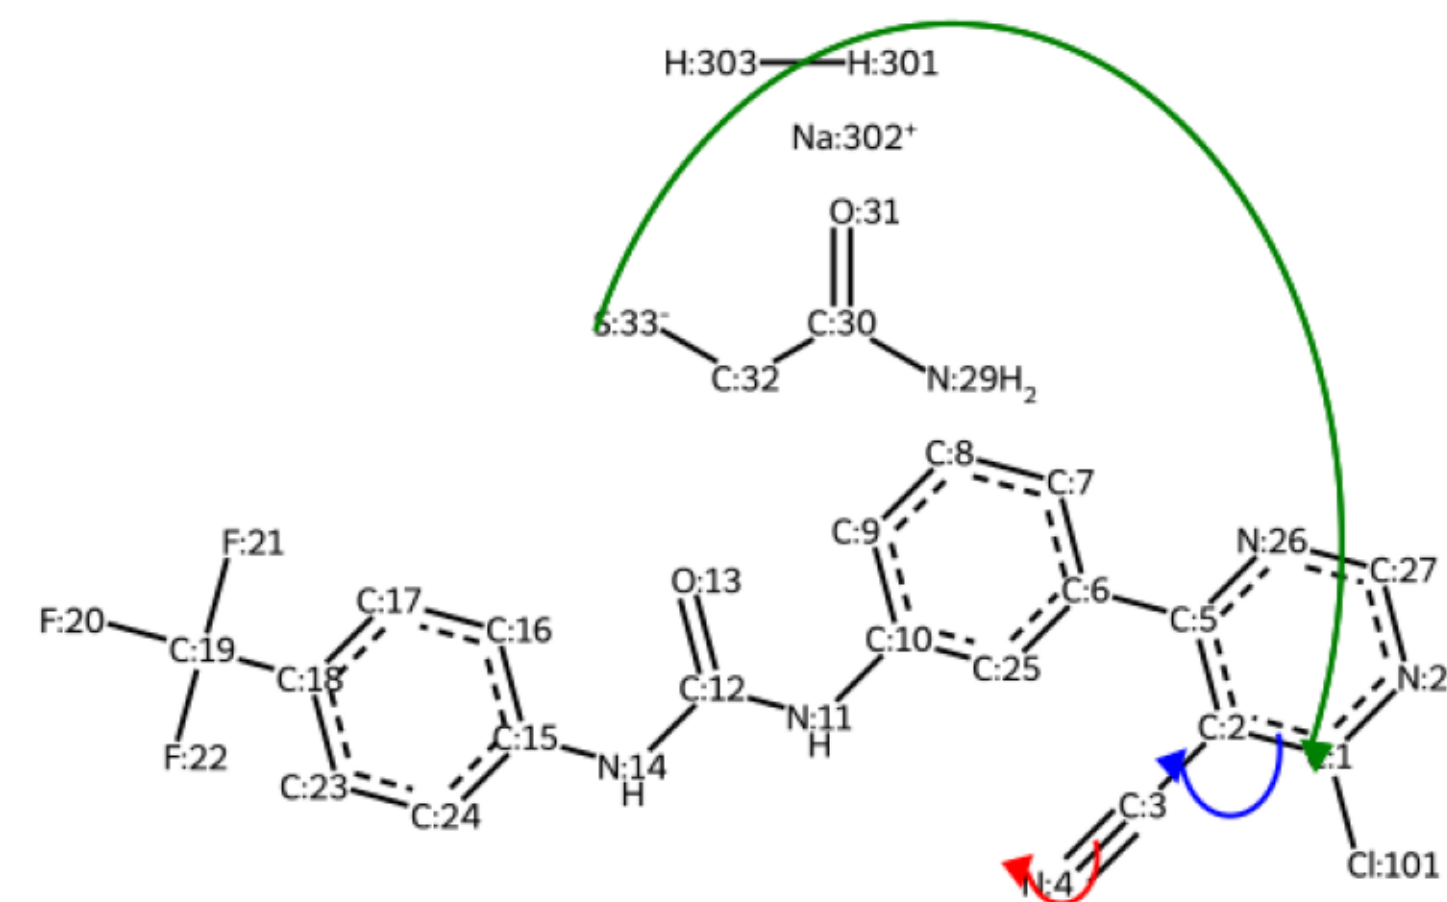

step #3

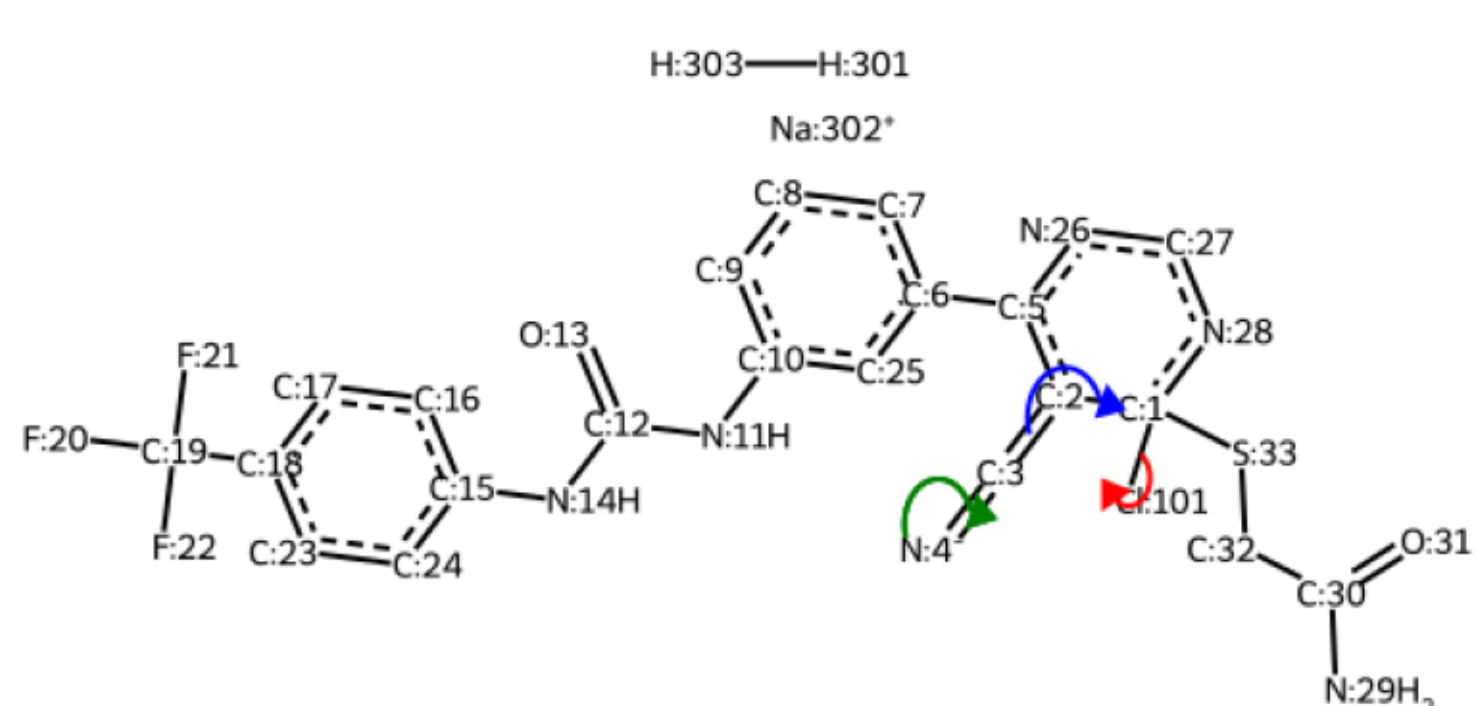

Product(s)

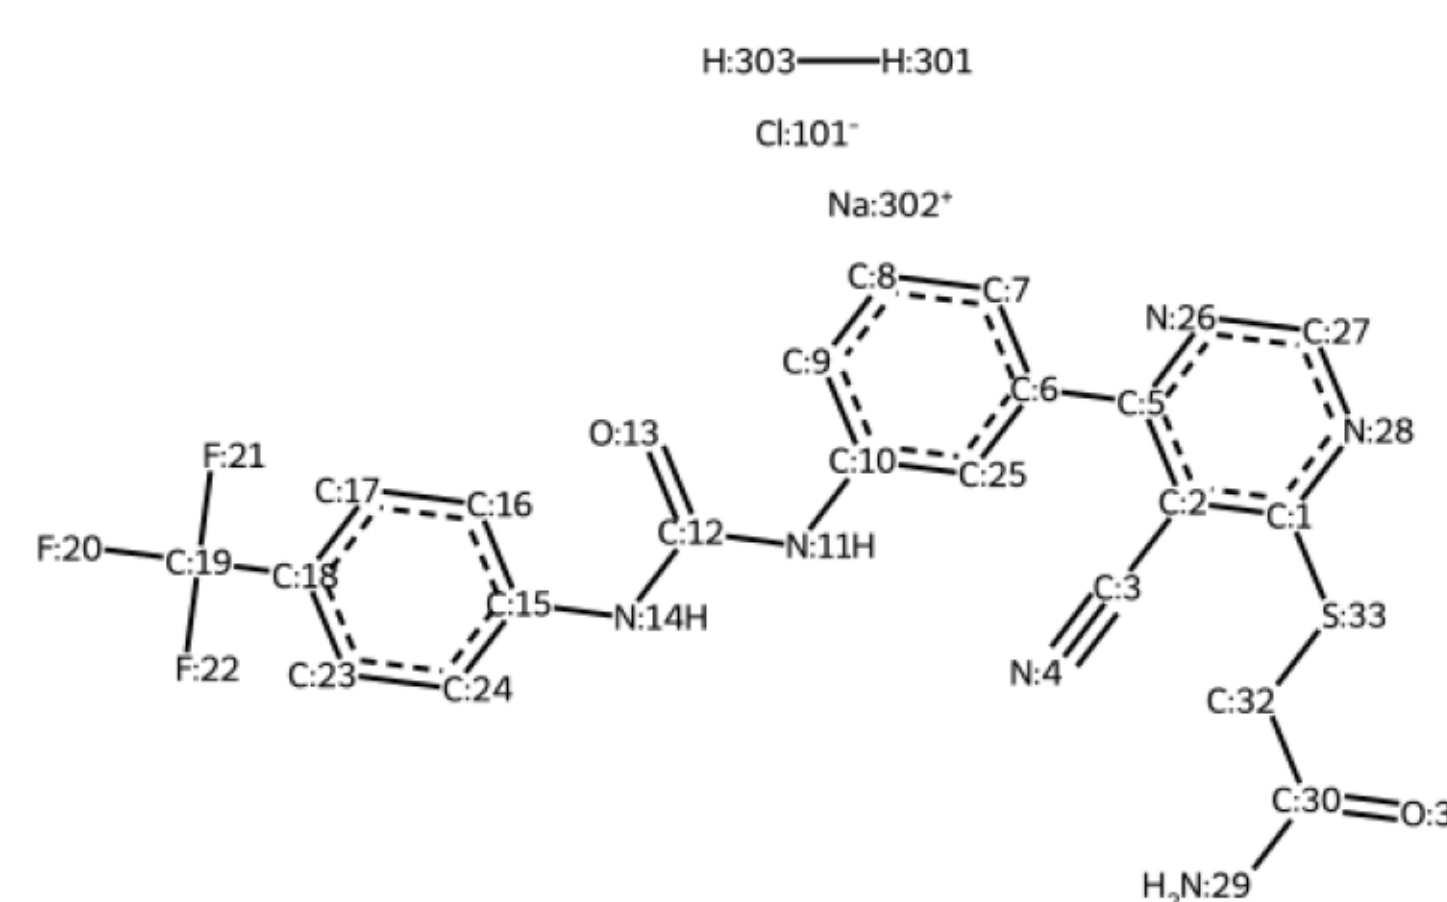



Original reaction  
sampled RXN\_ID:41)

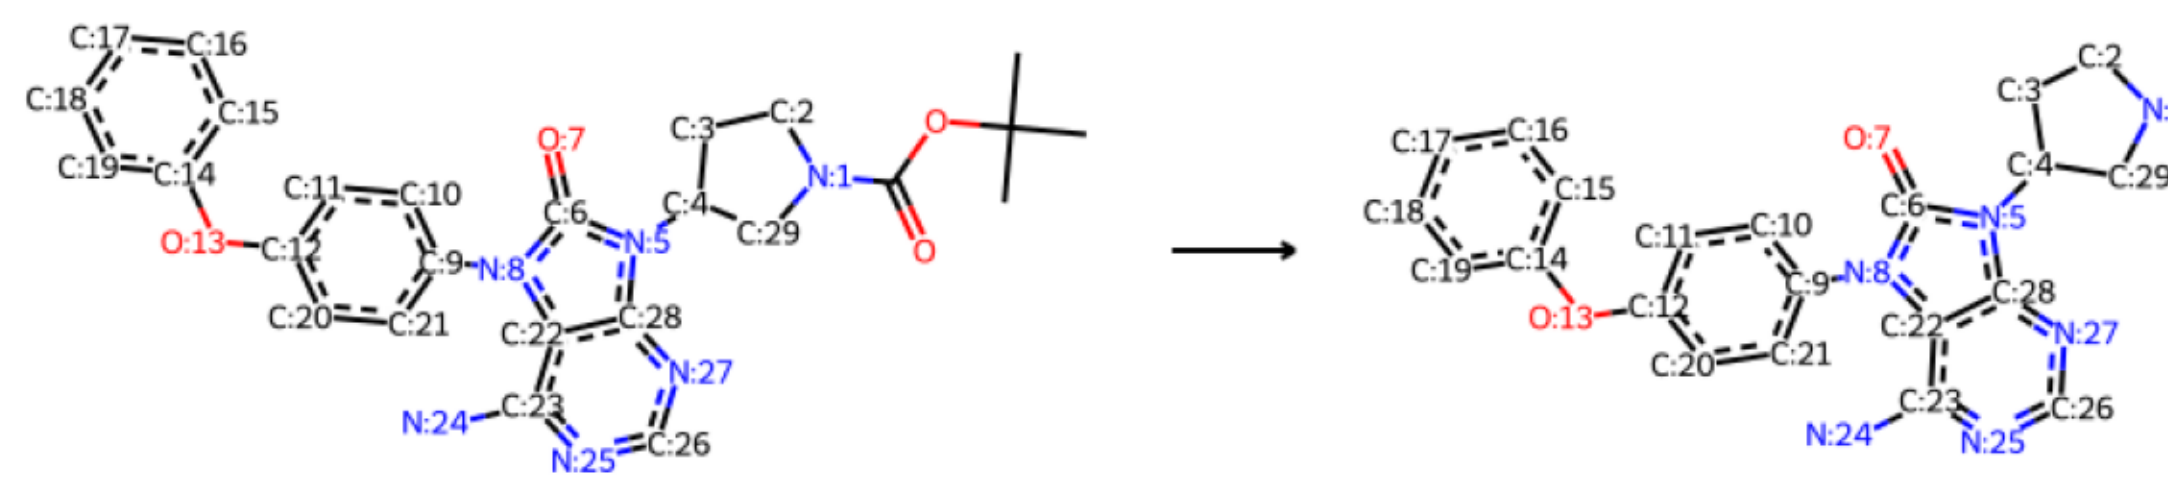

Identified mechanistic class -  
Boc\_deprotection reaction

Reaction with missing reagents recovered

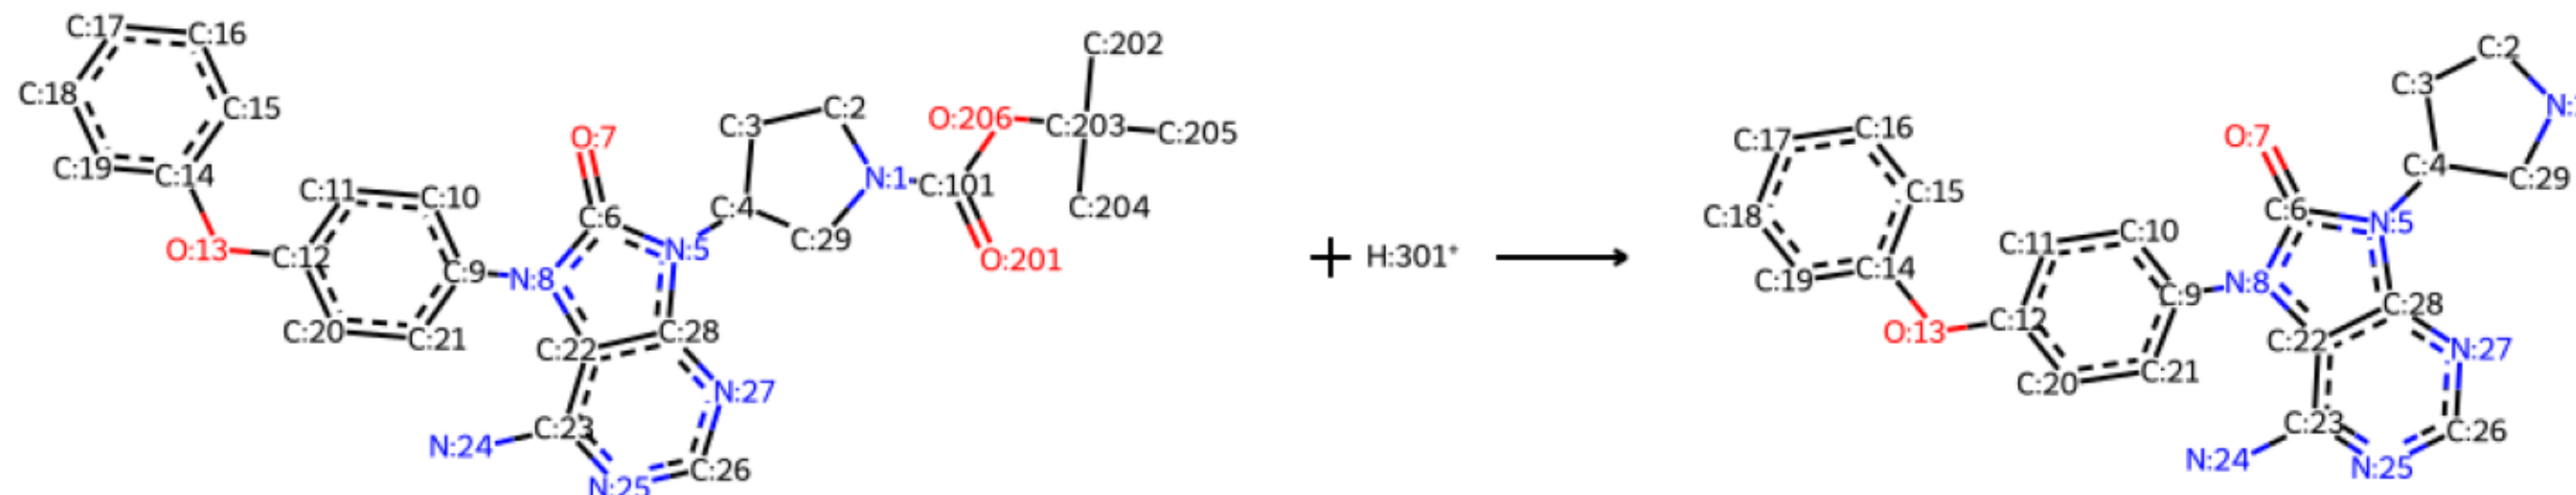

Proposed mechanistic pathway

[Arrow order: (1) green, (2) blue, (3) red, (4) orange]

step #1

step #2

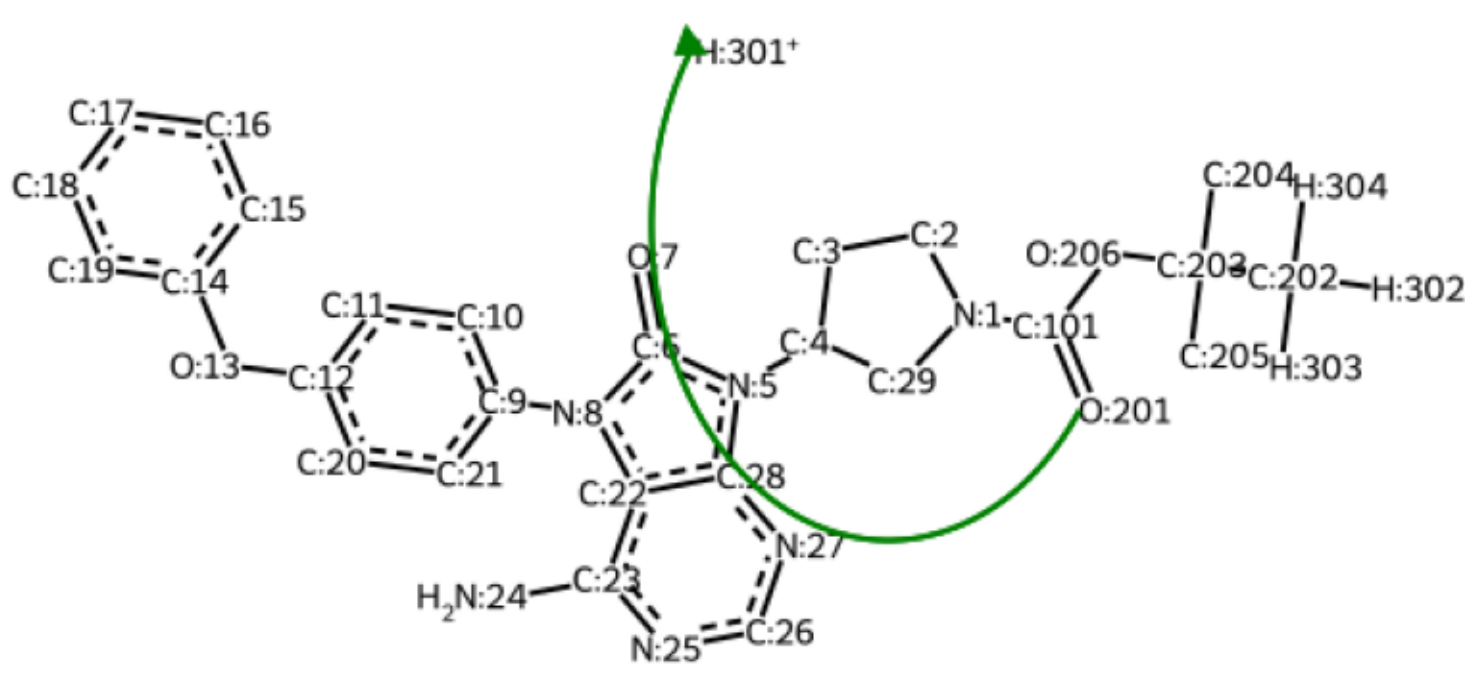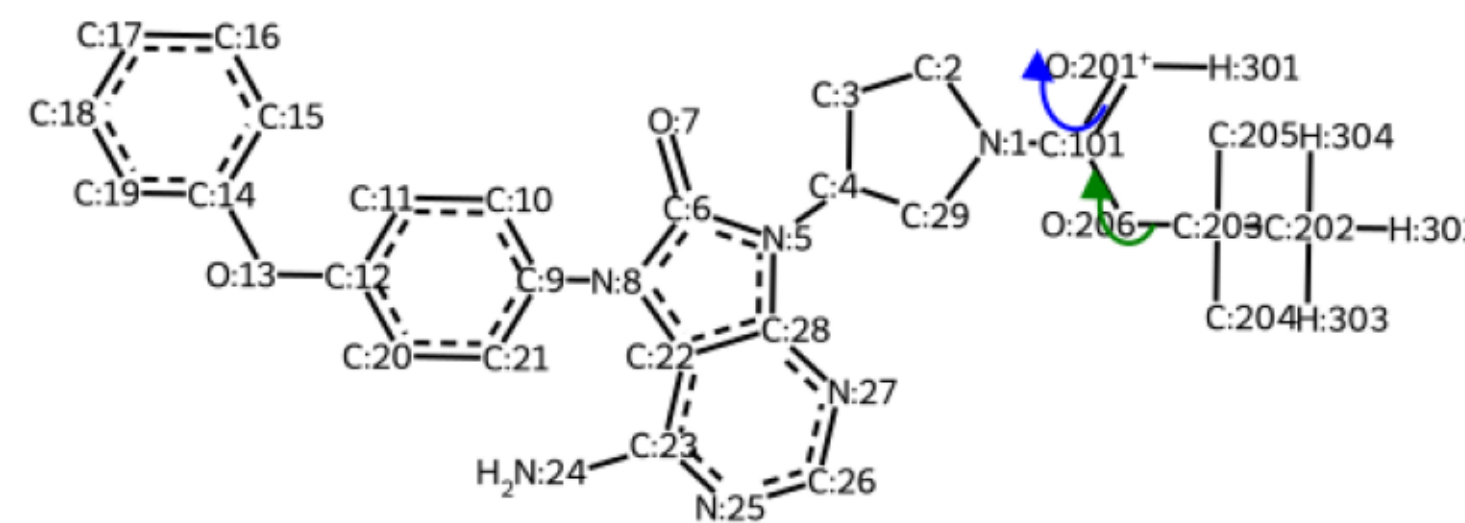

step #3

step #4

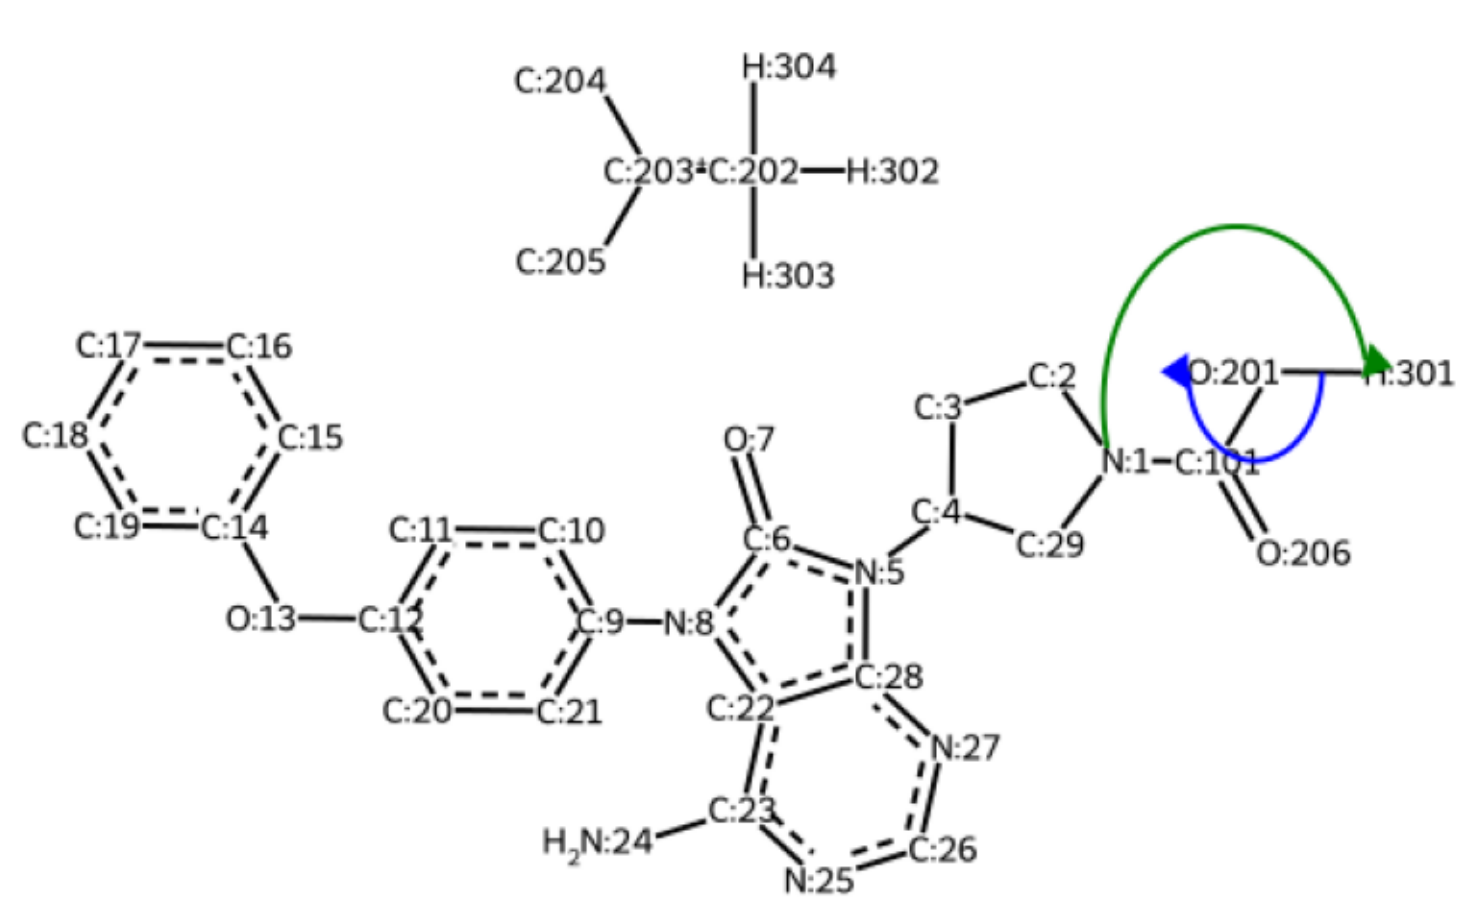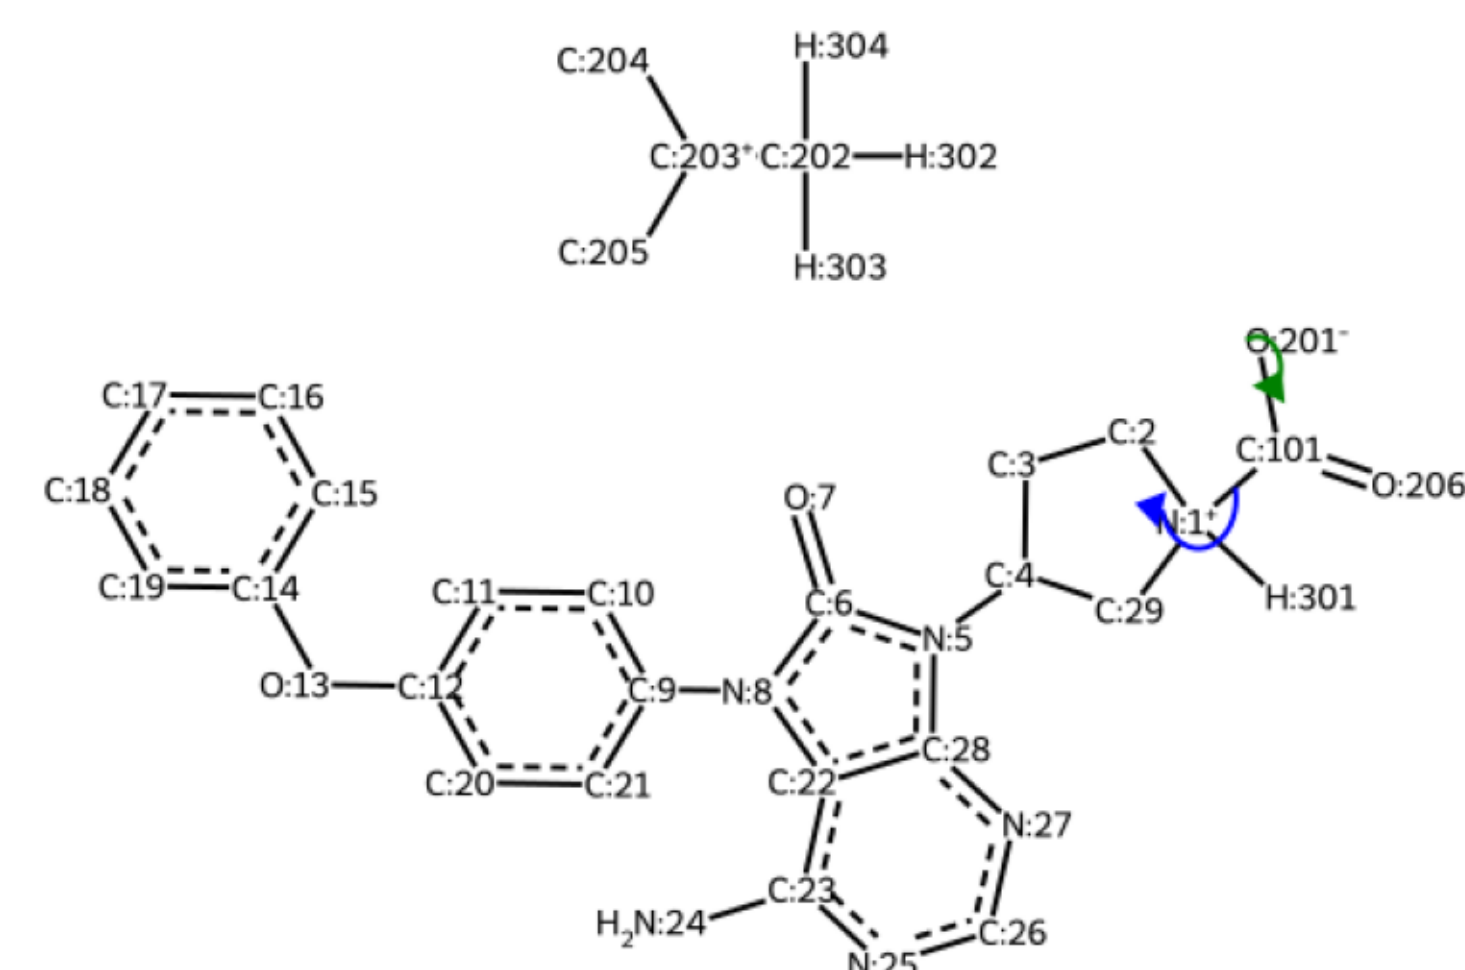

step #5

Product(s)

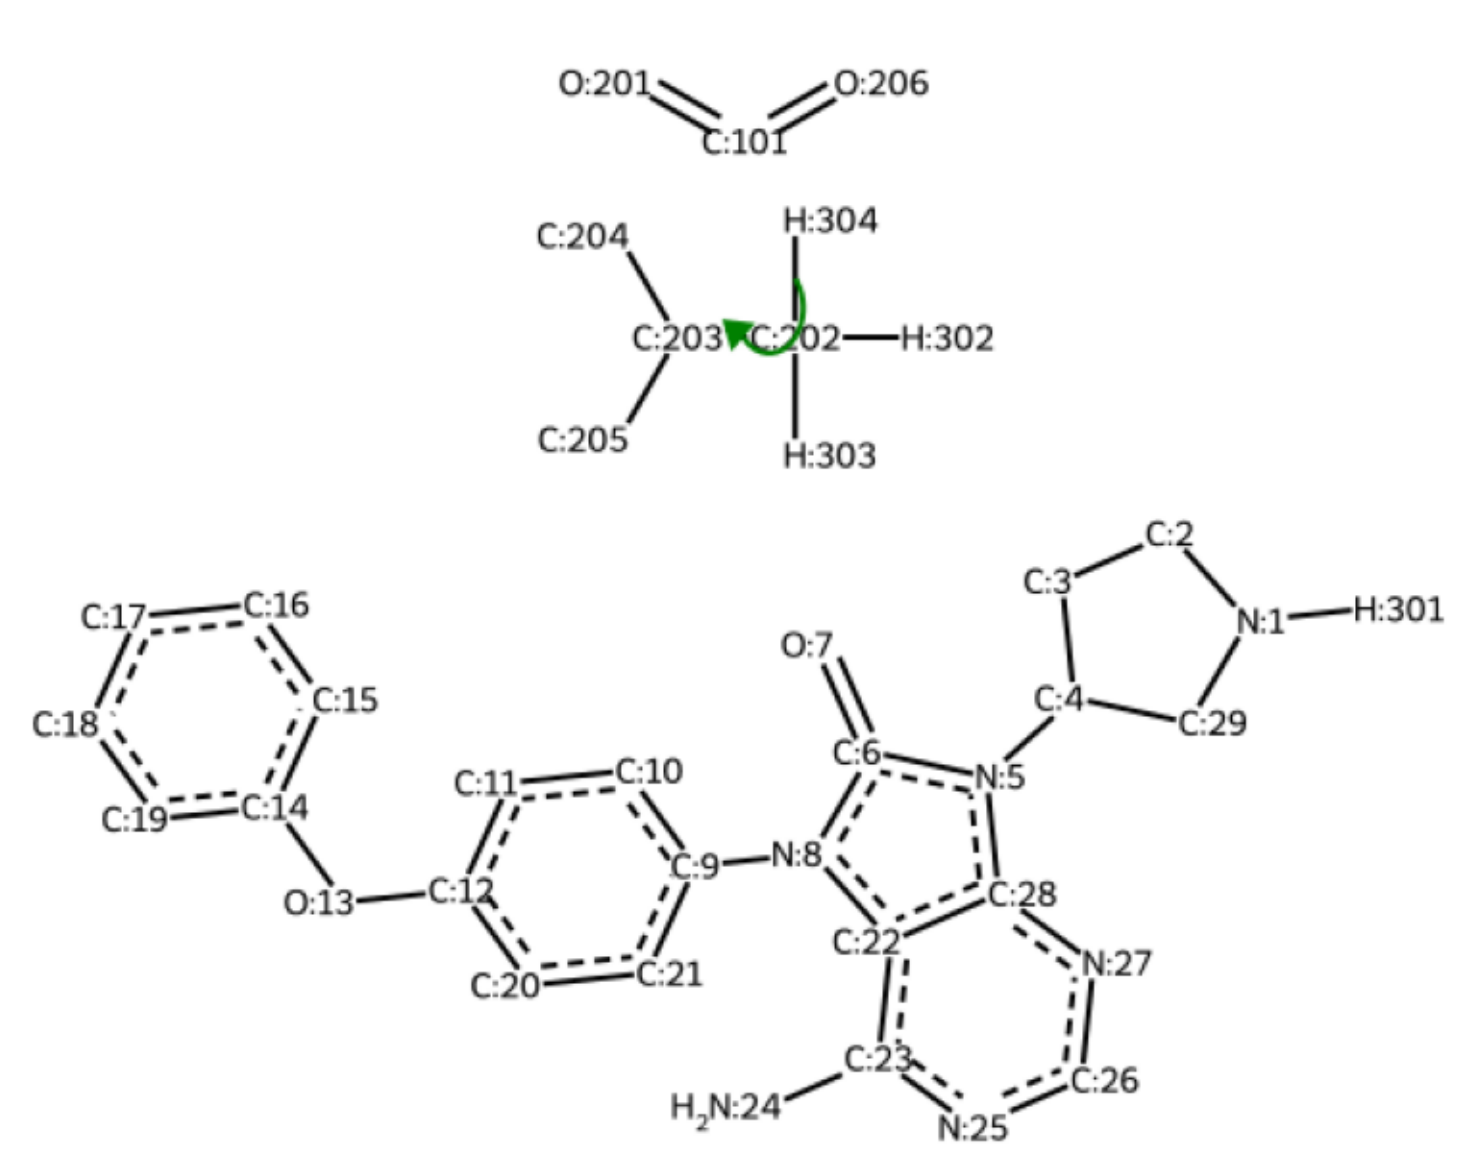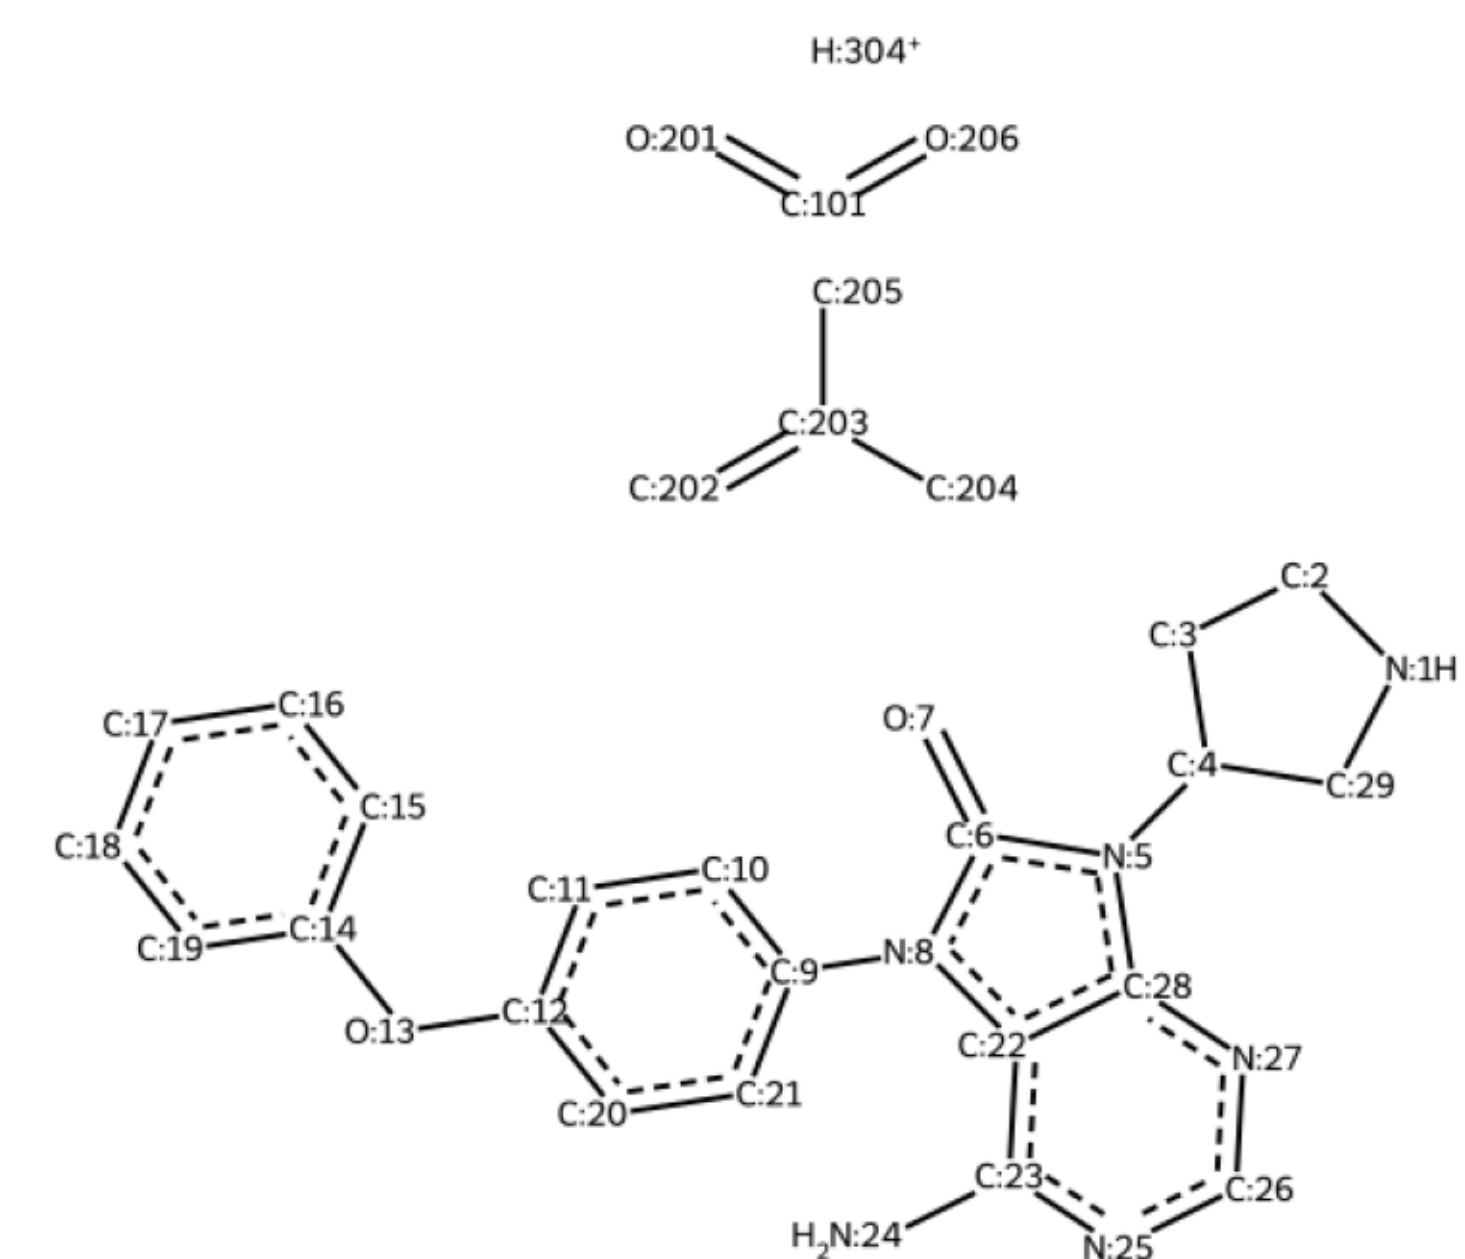



Original reaction  
sampled RXN\_ID:42)

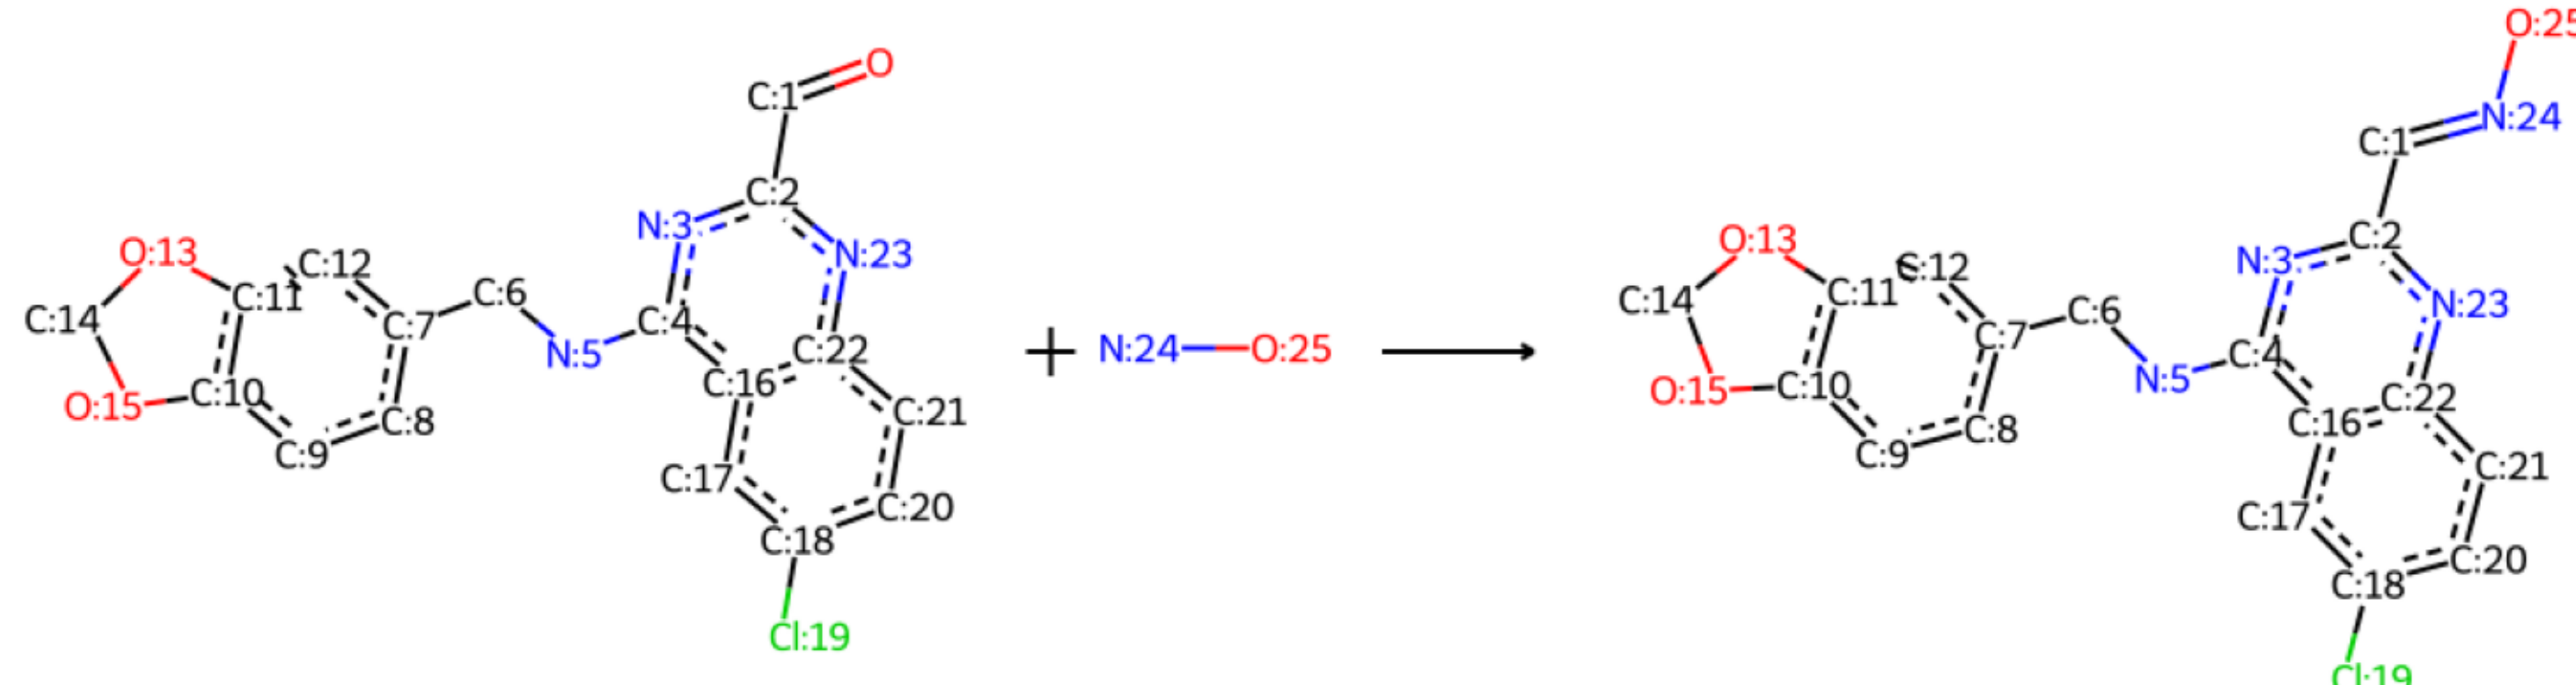

Identified mechanistic class -  
imine\_formation reaction

Reaction with missing reagents recovered

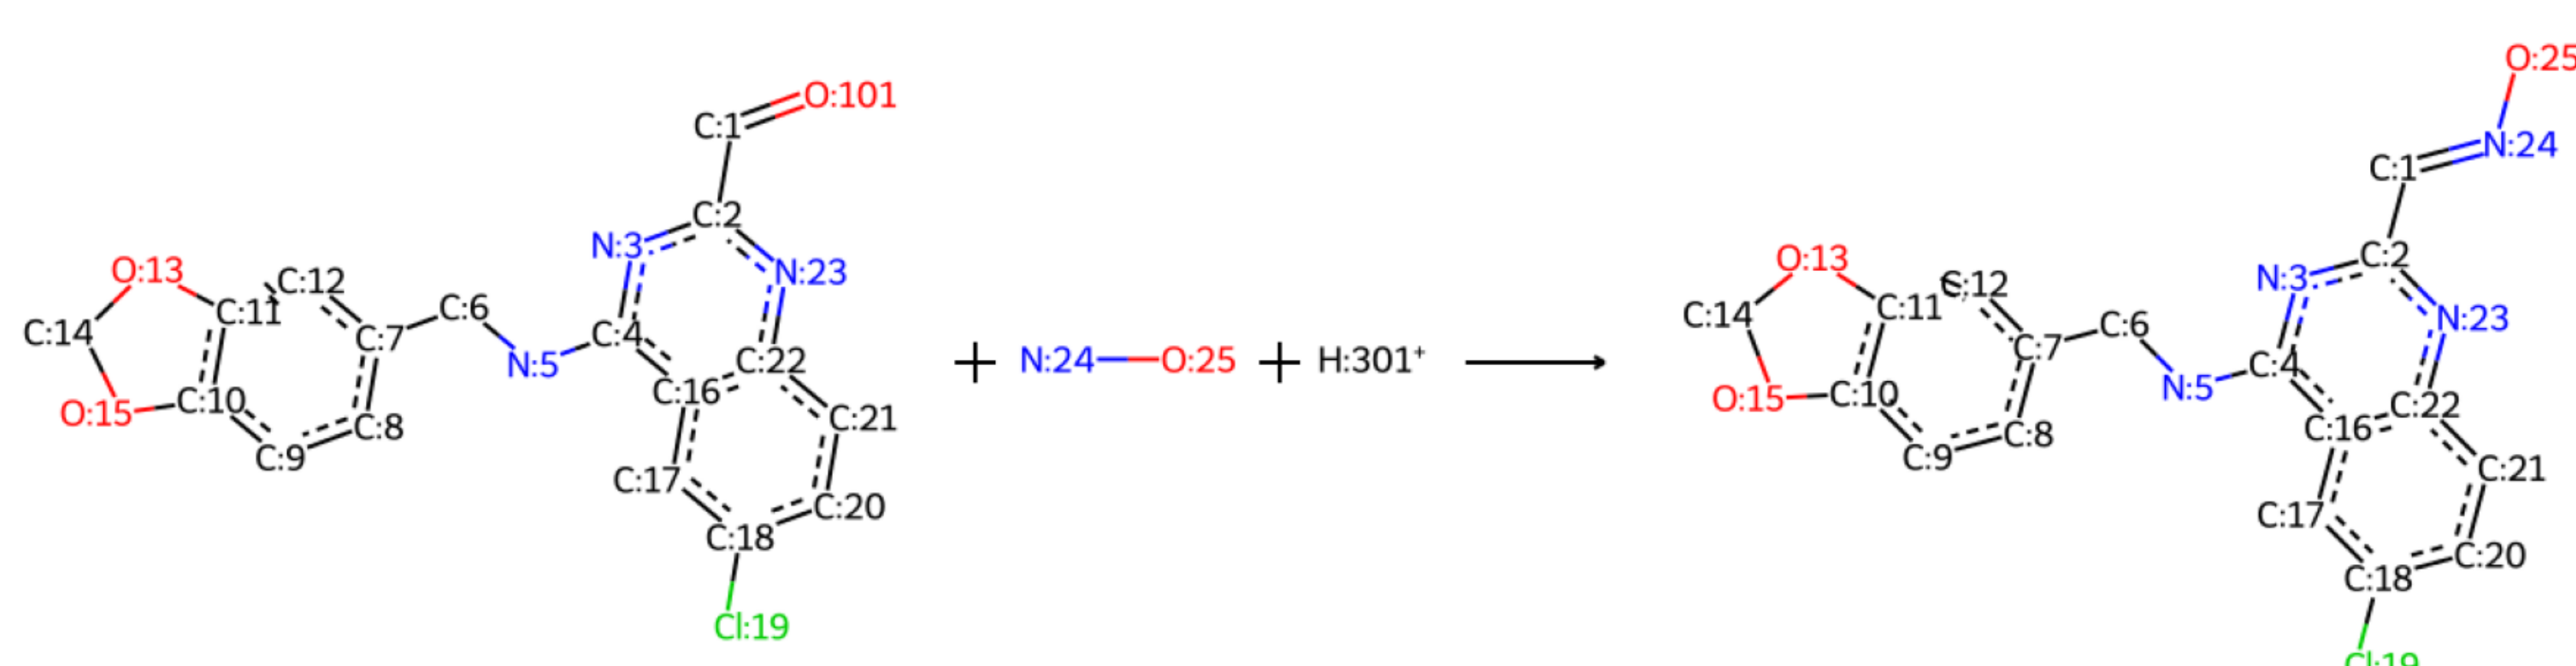

Proposed mechanistic pathway

[Arrow order: (1) green, (2) blue, (3) red, (4) orange]

step #1

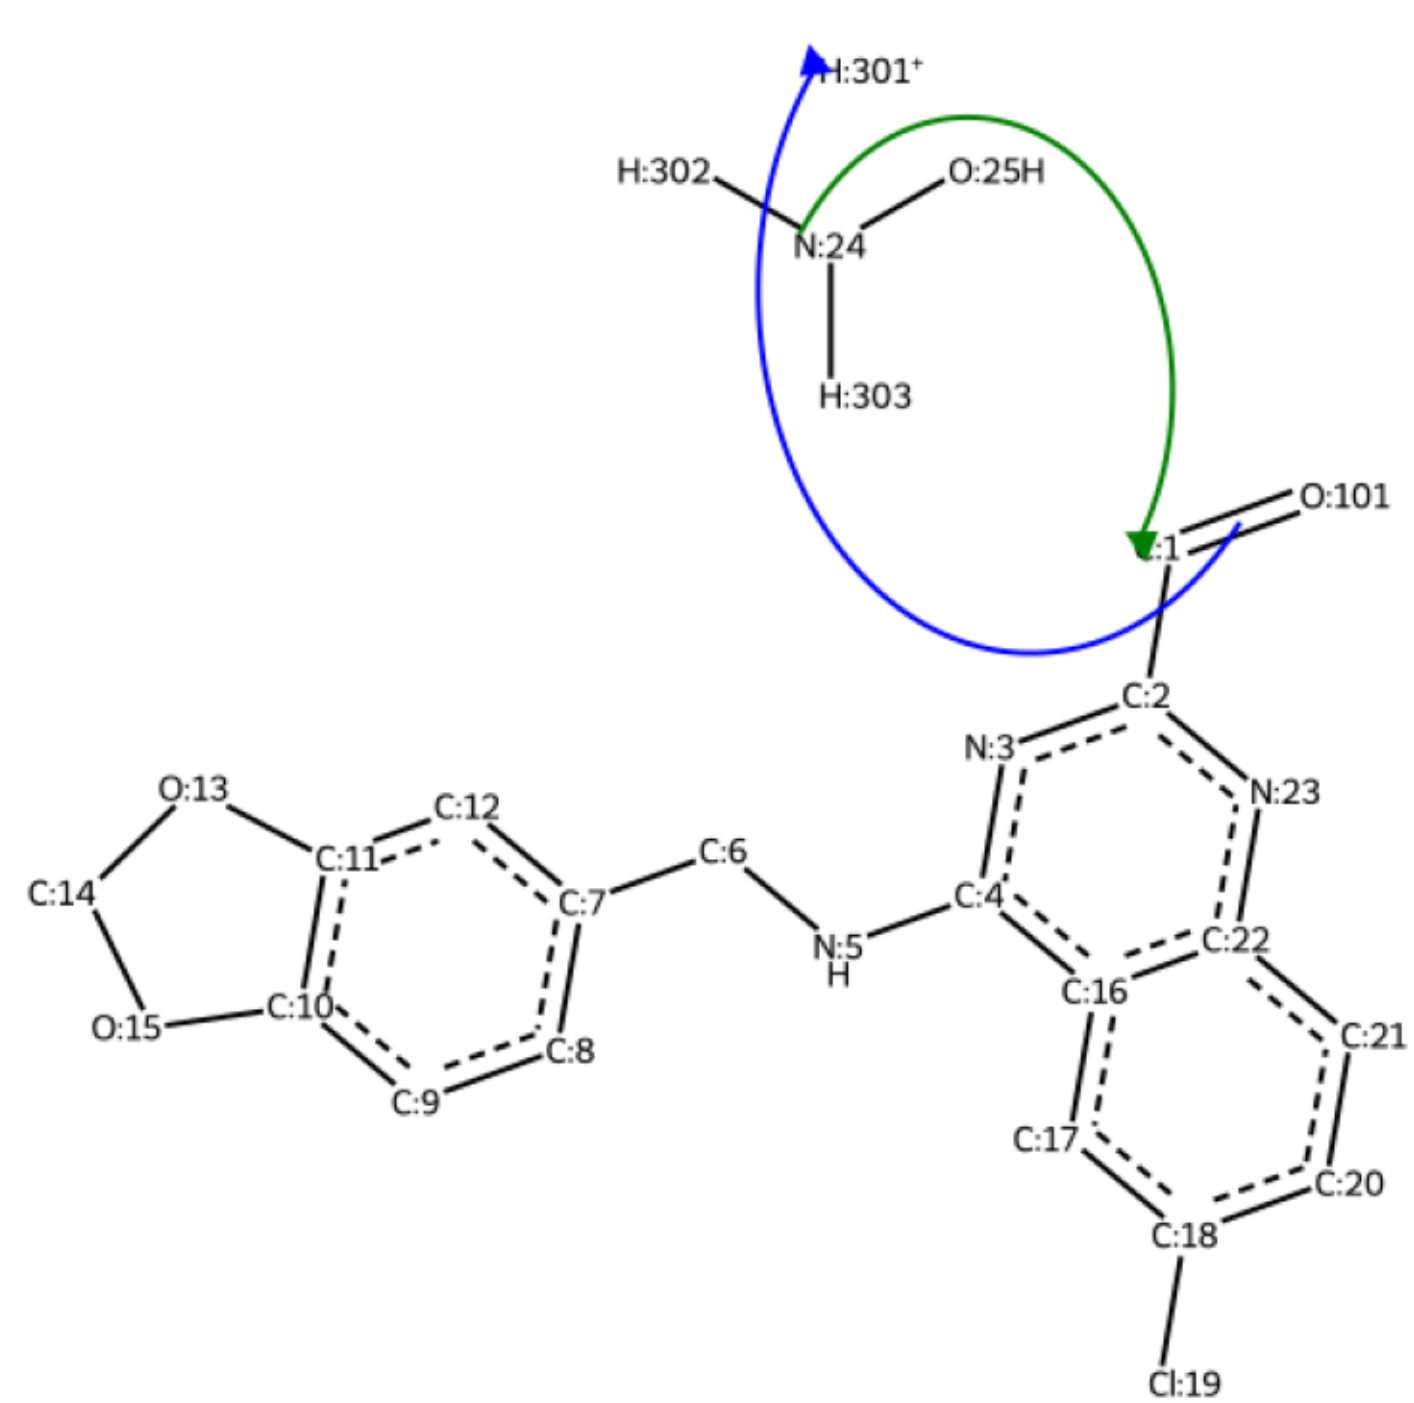

step #2

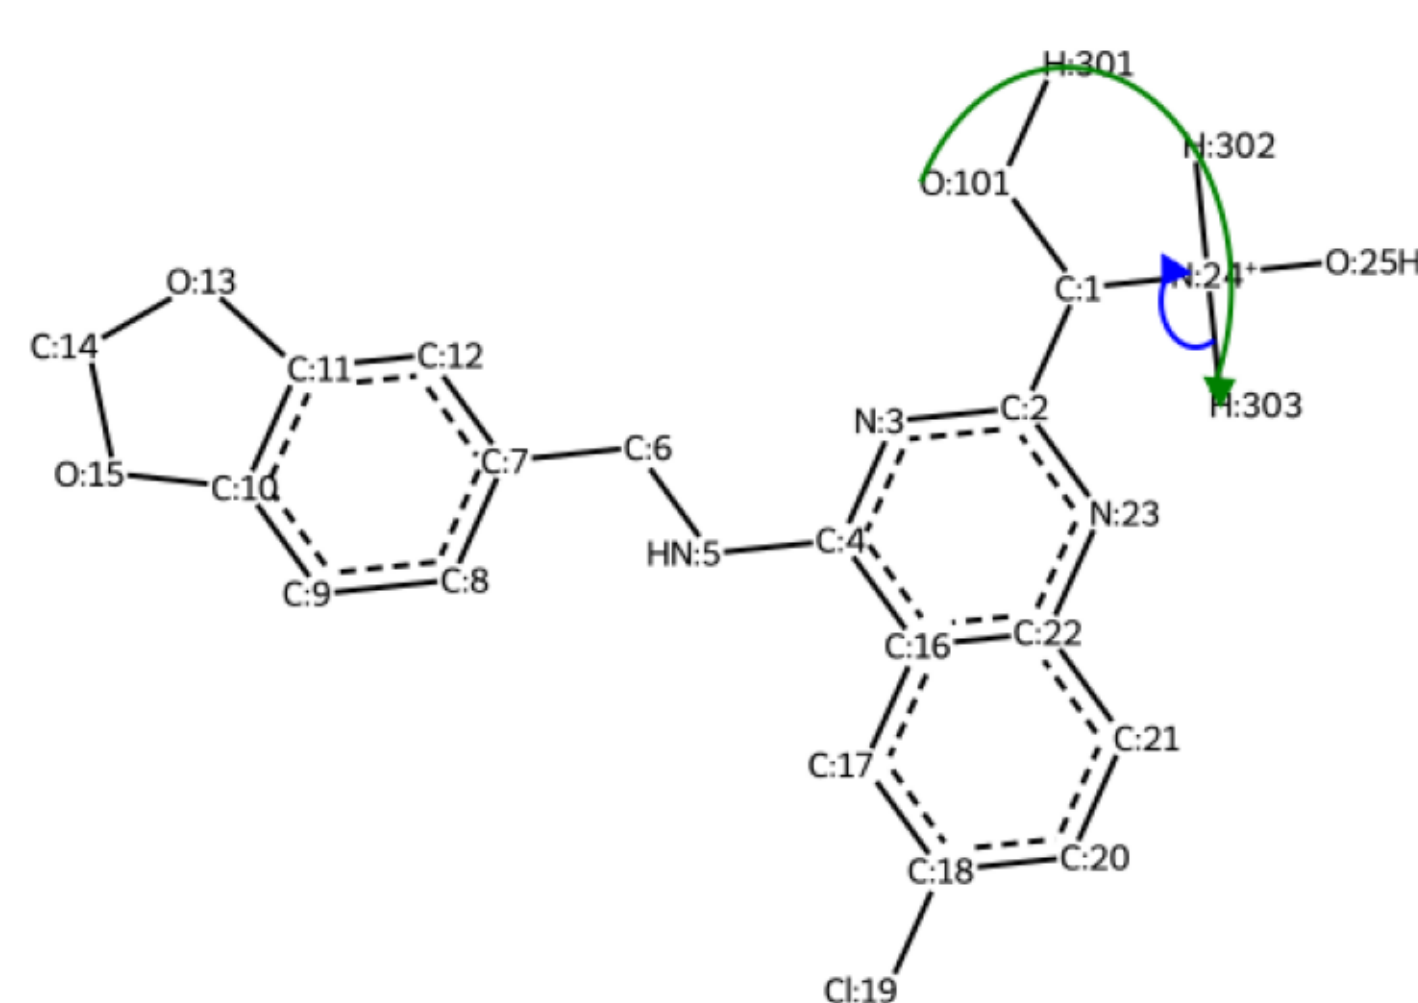

step #3

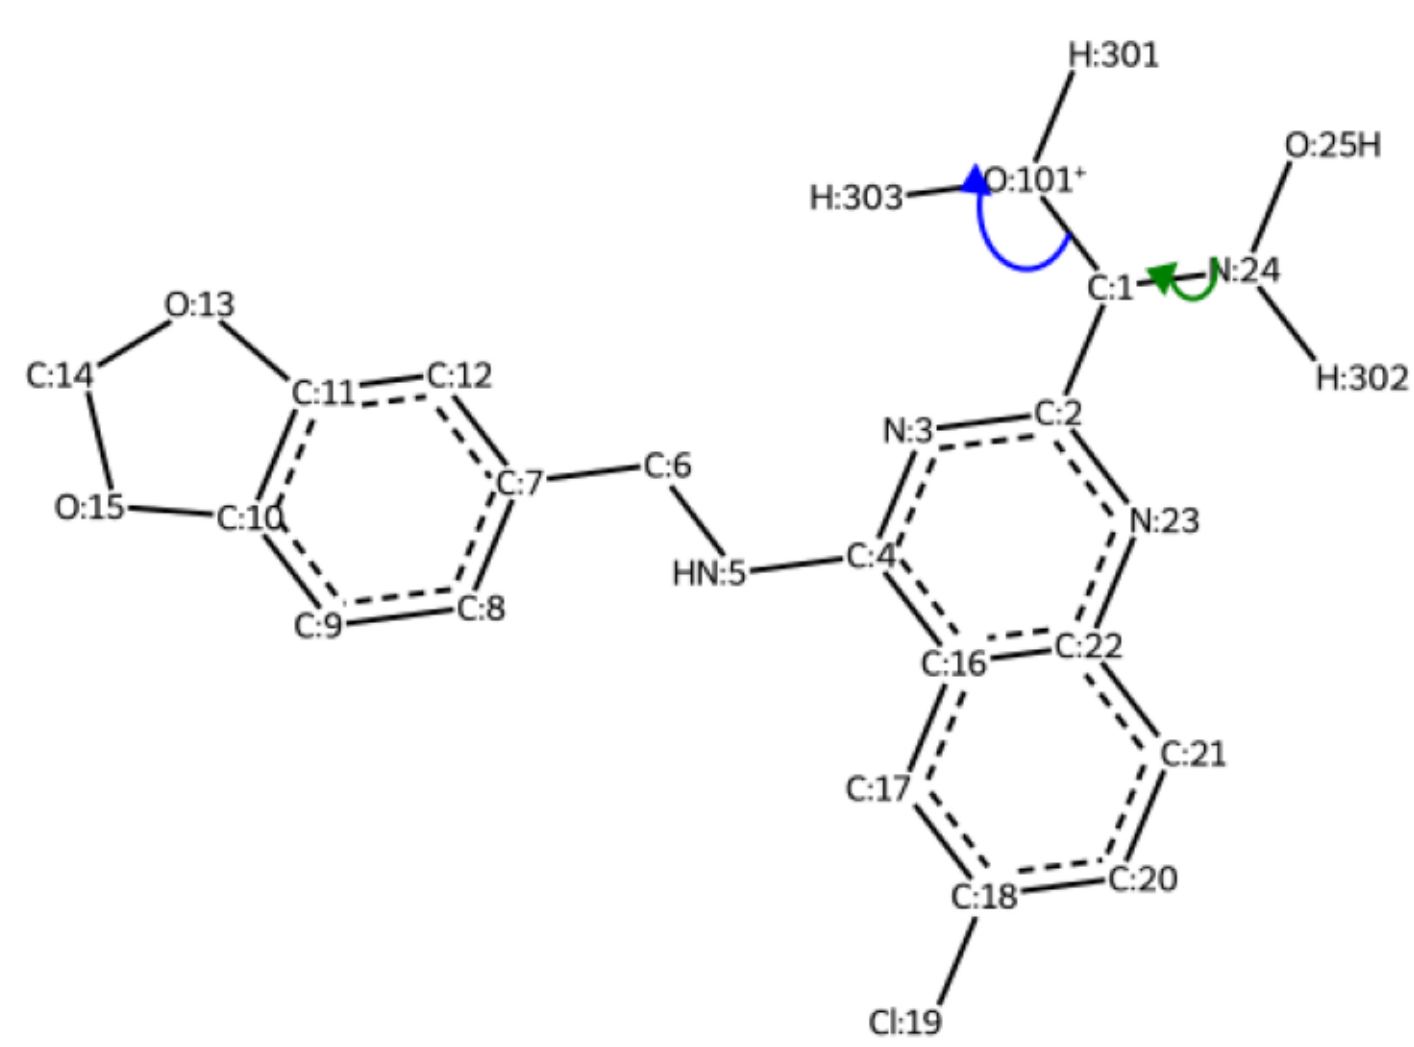

step #4

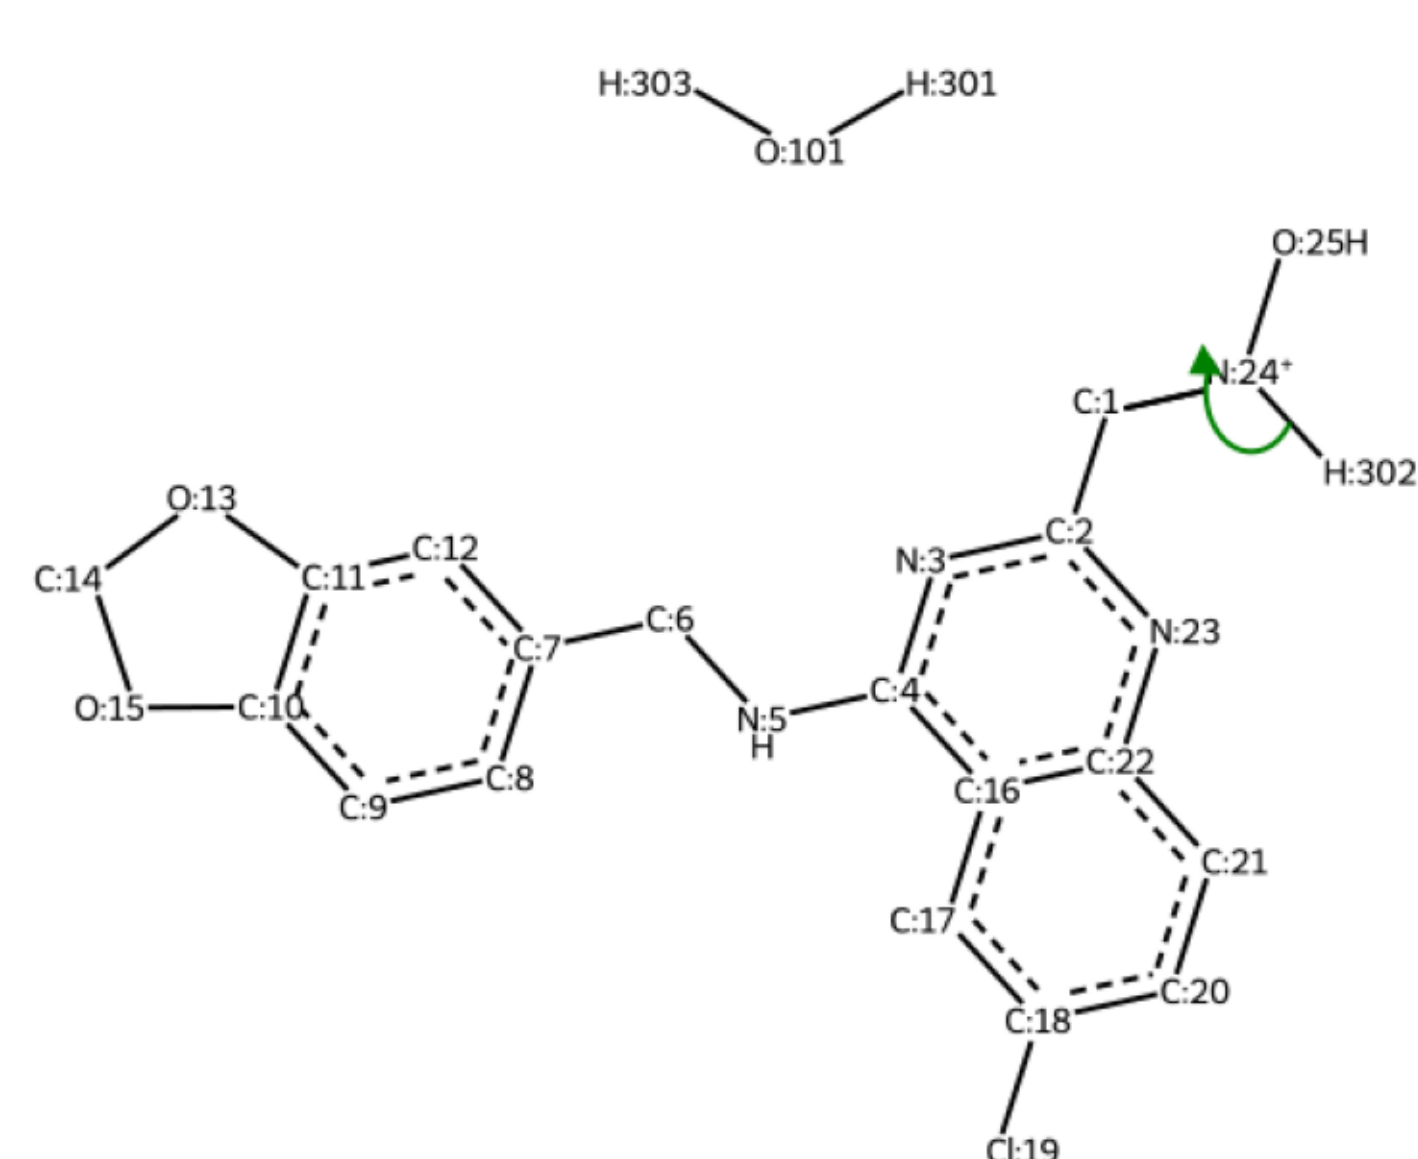

Product(s)

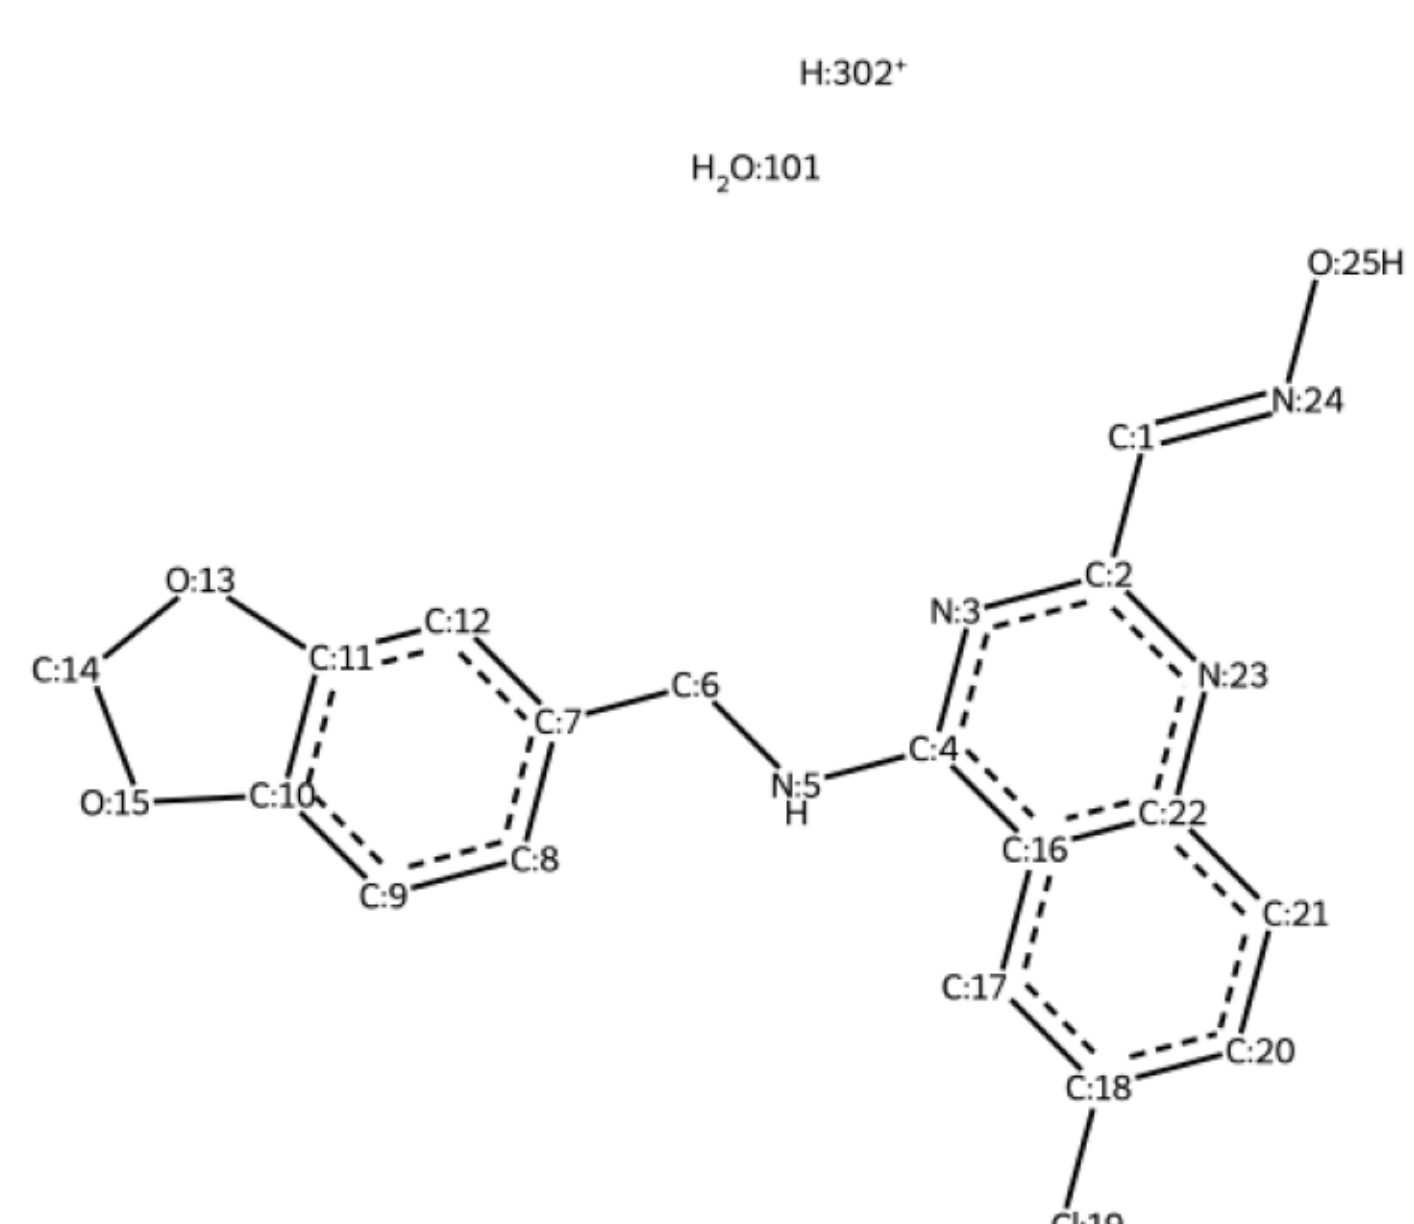



Original reaction  
sampled RXN\_ID:43)

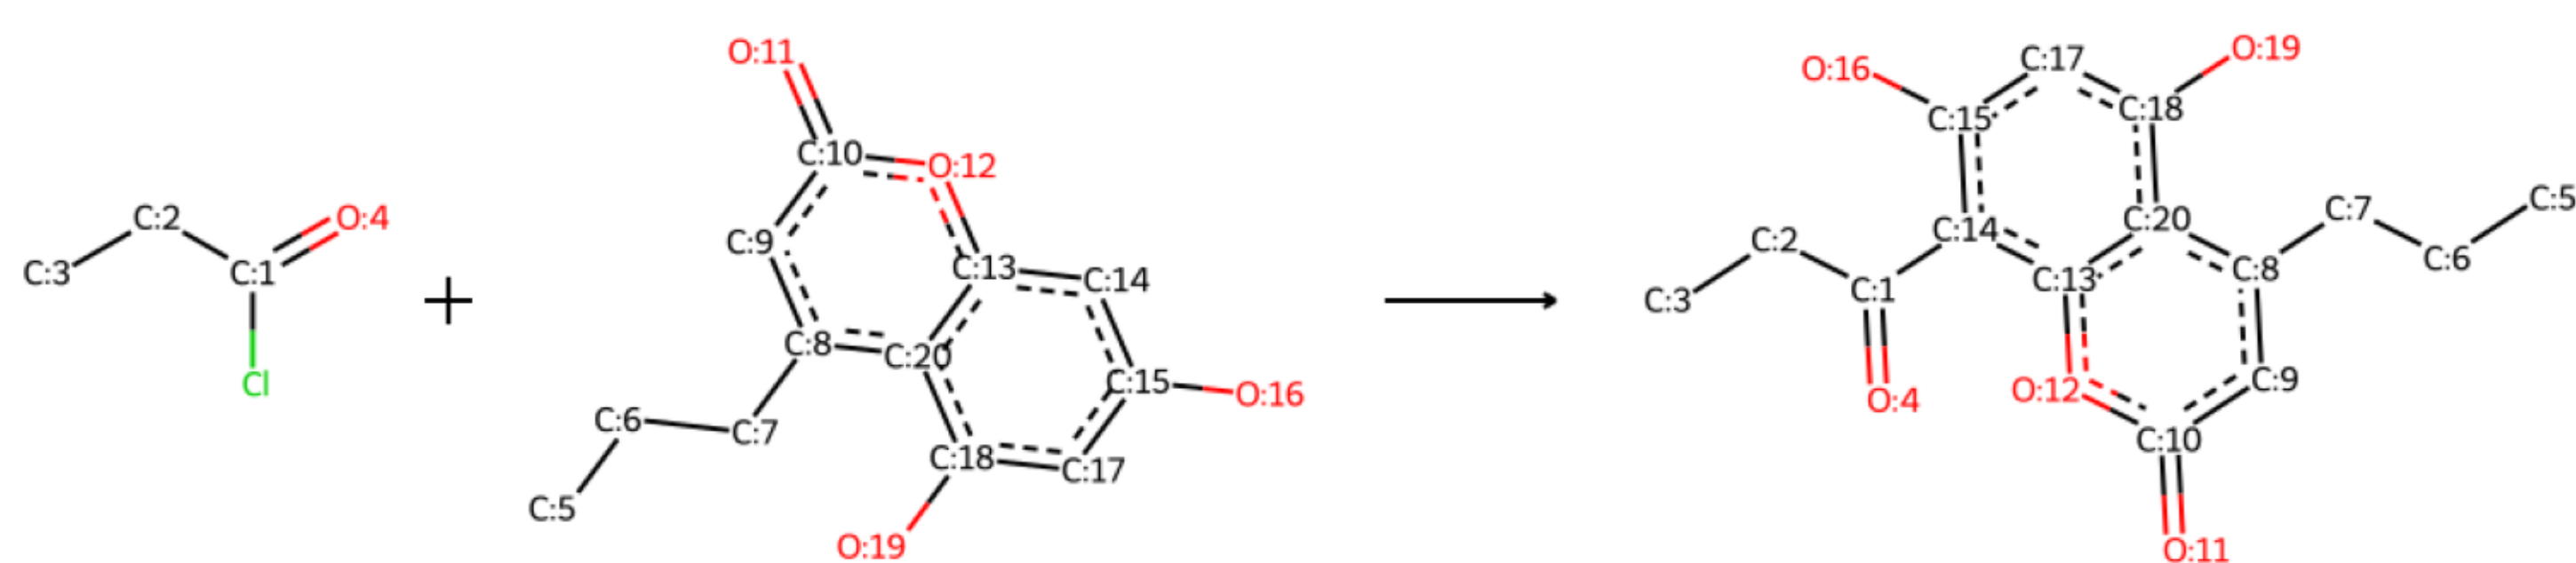

Identified mechanistic class -  
Friedel\_Crafts\_acylation reaction

Reaction with missing reagents recovered

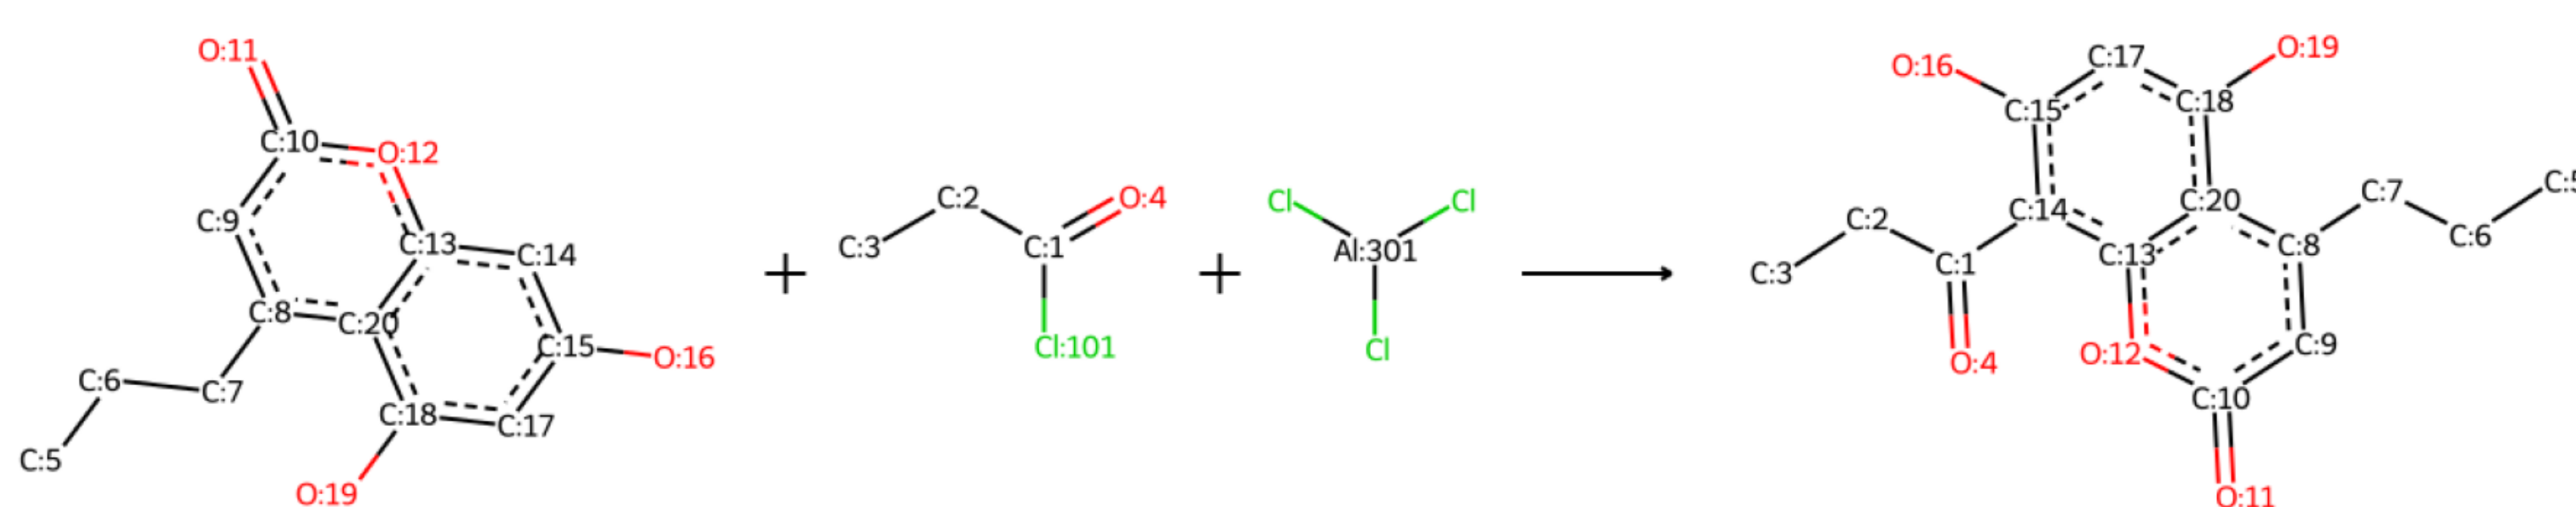

Proposed mechanistic pathway

[Arrow order: (1) green, (2) blue, (3) red, (4) orange]

step #1

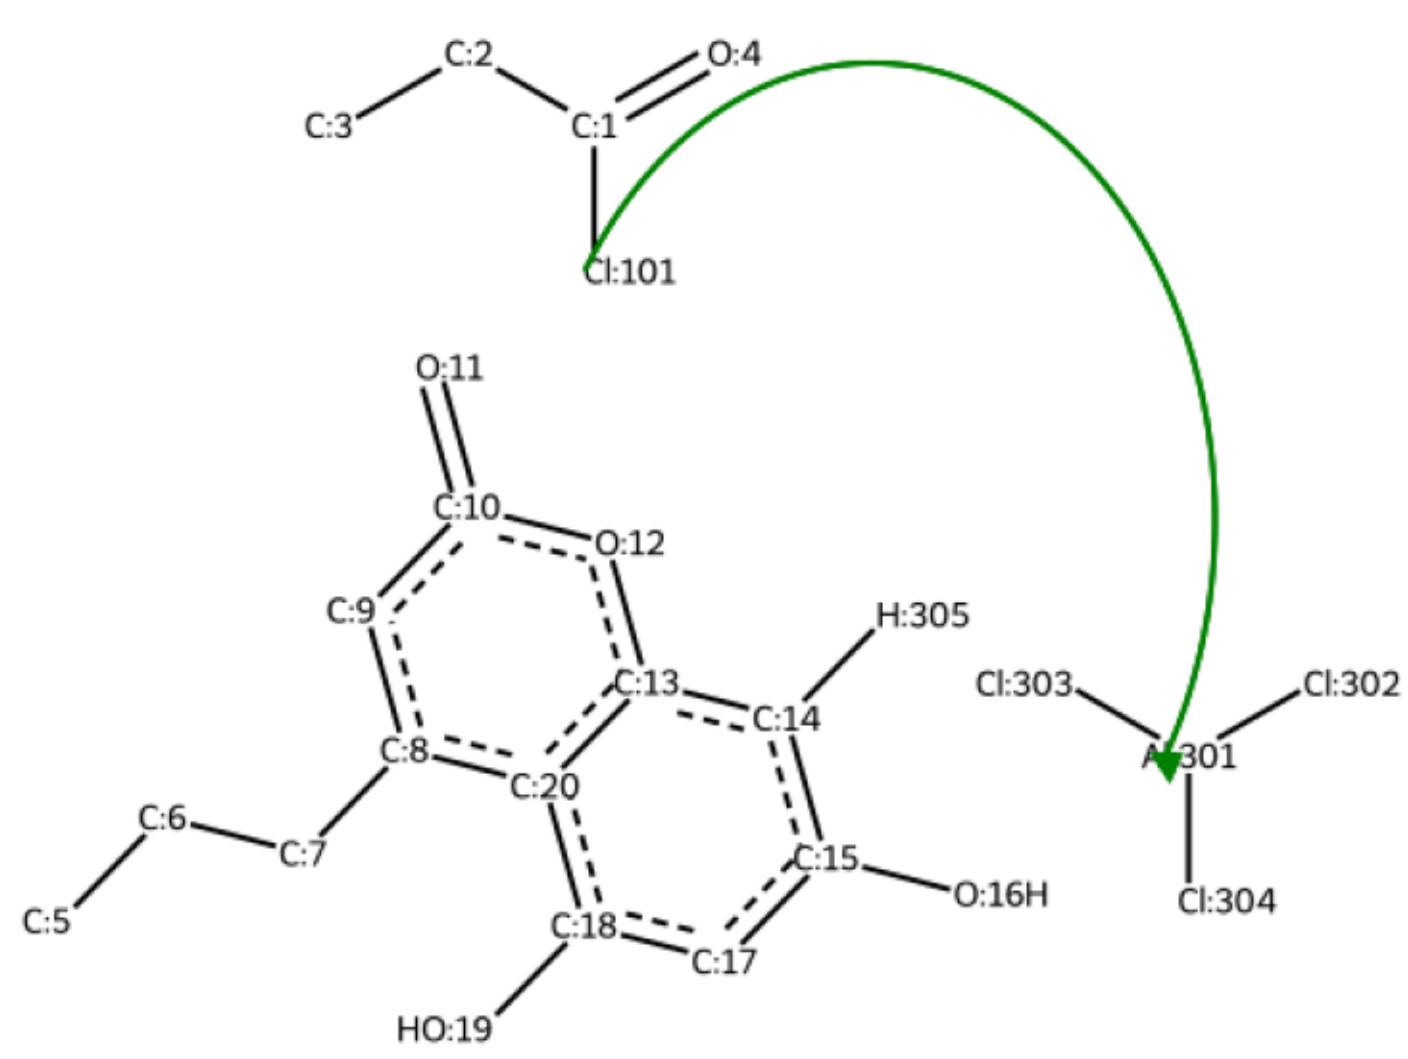

step #2

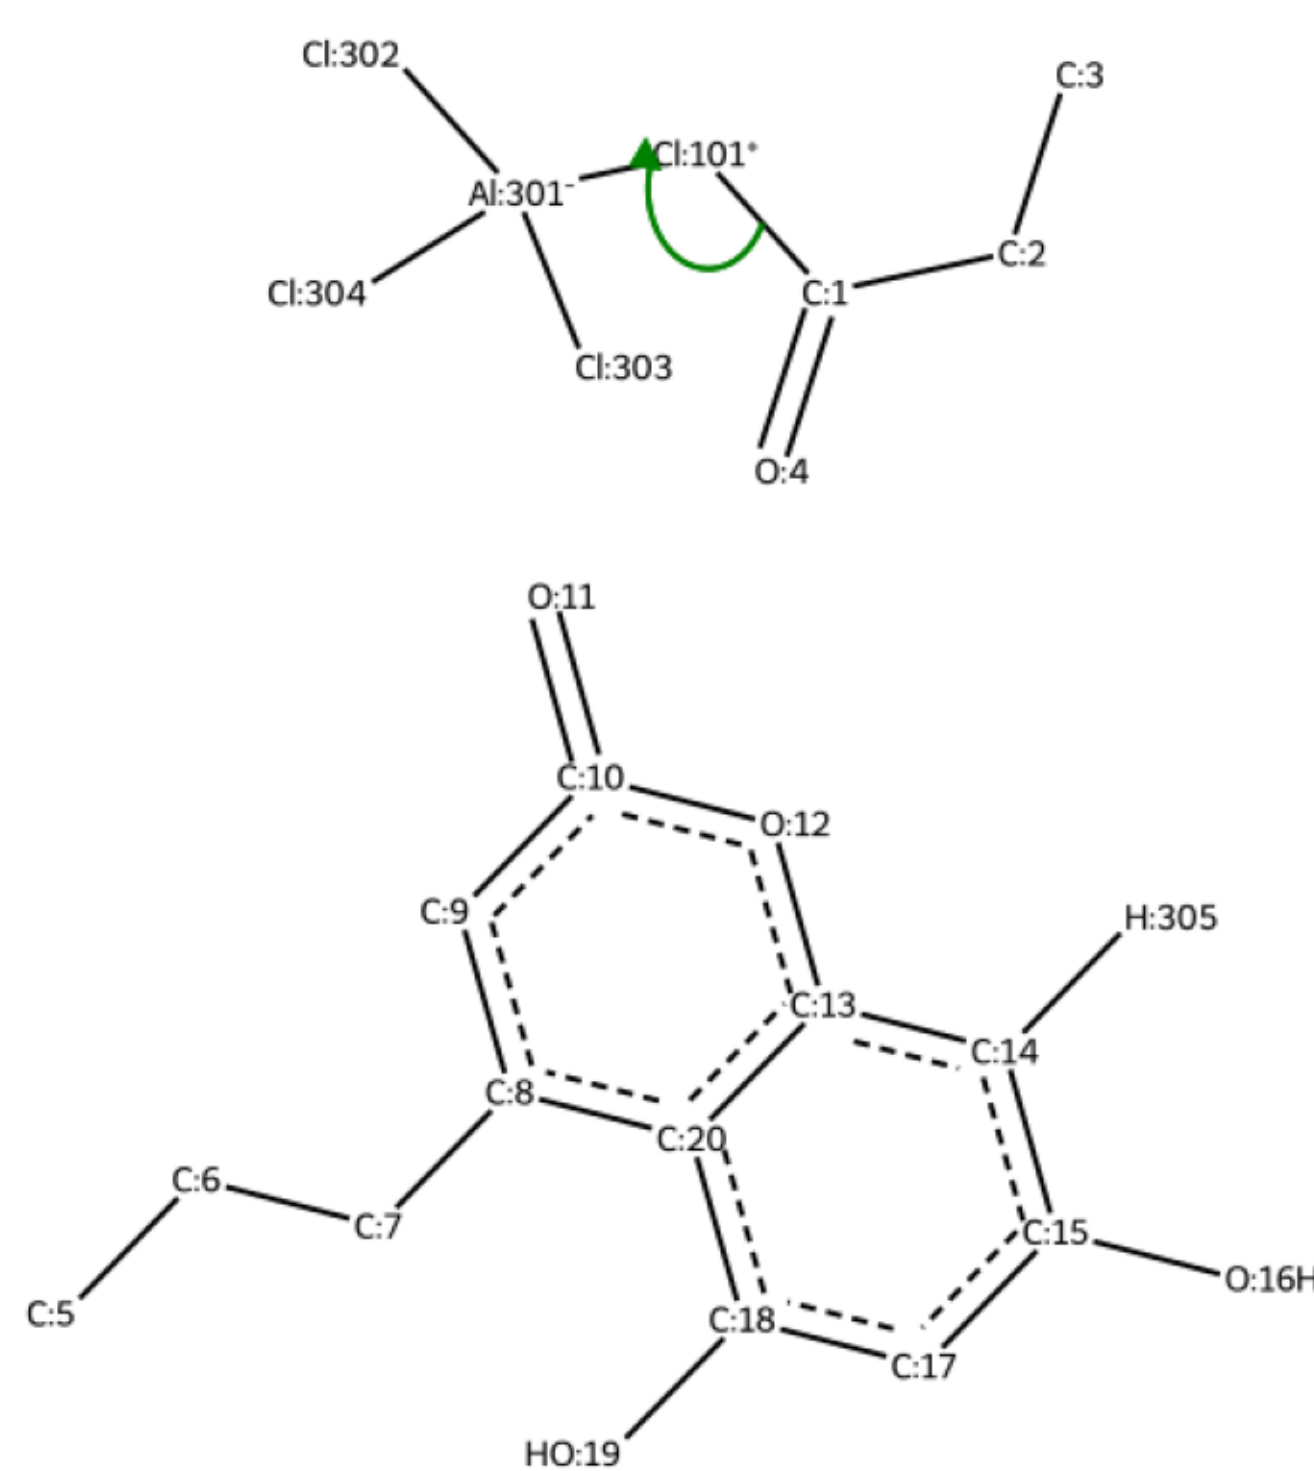

step #3

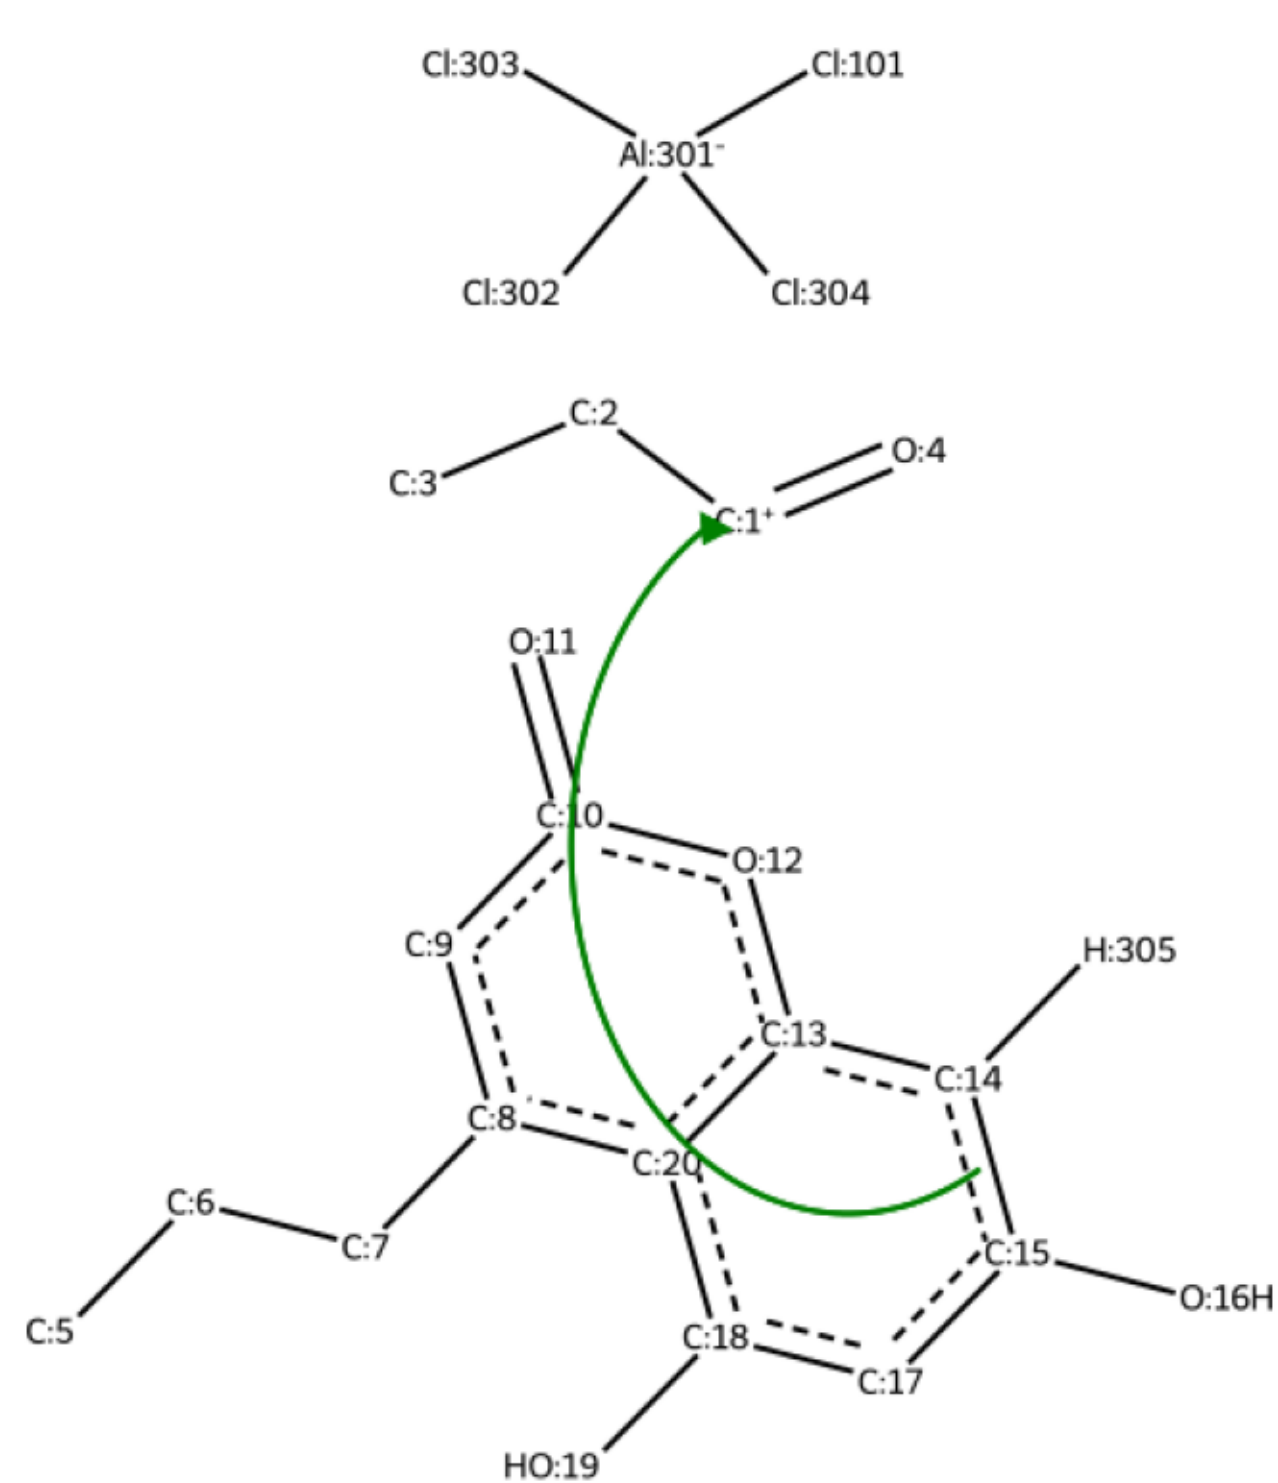

step #4

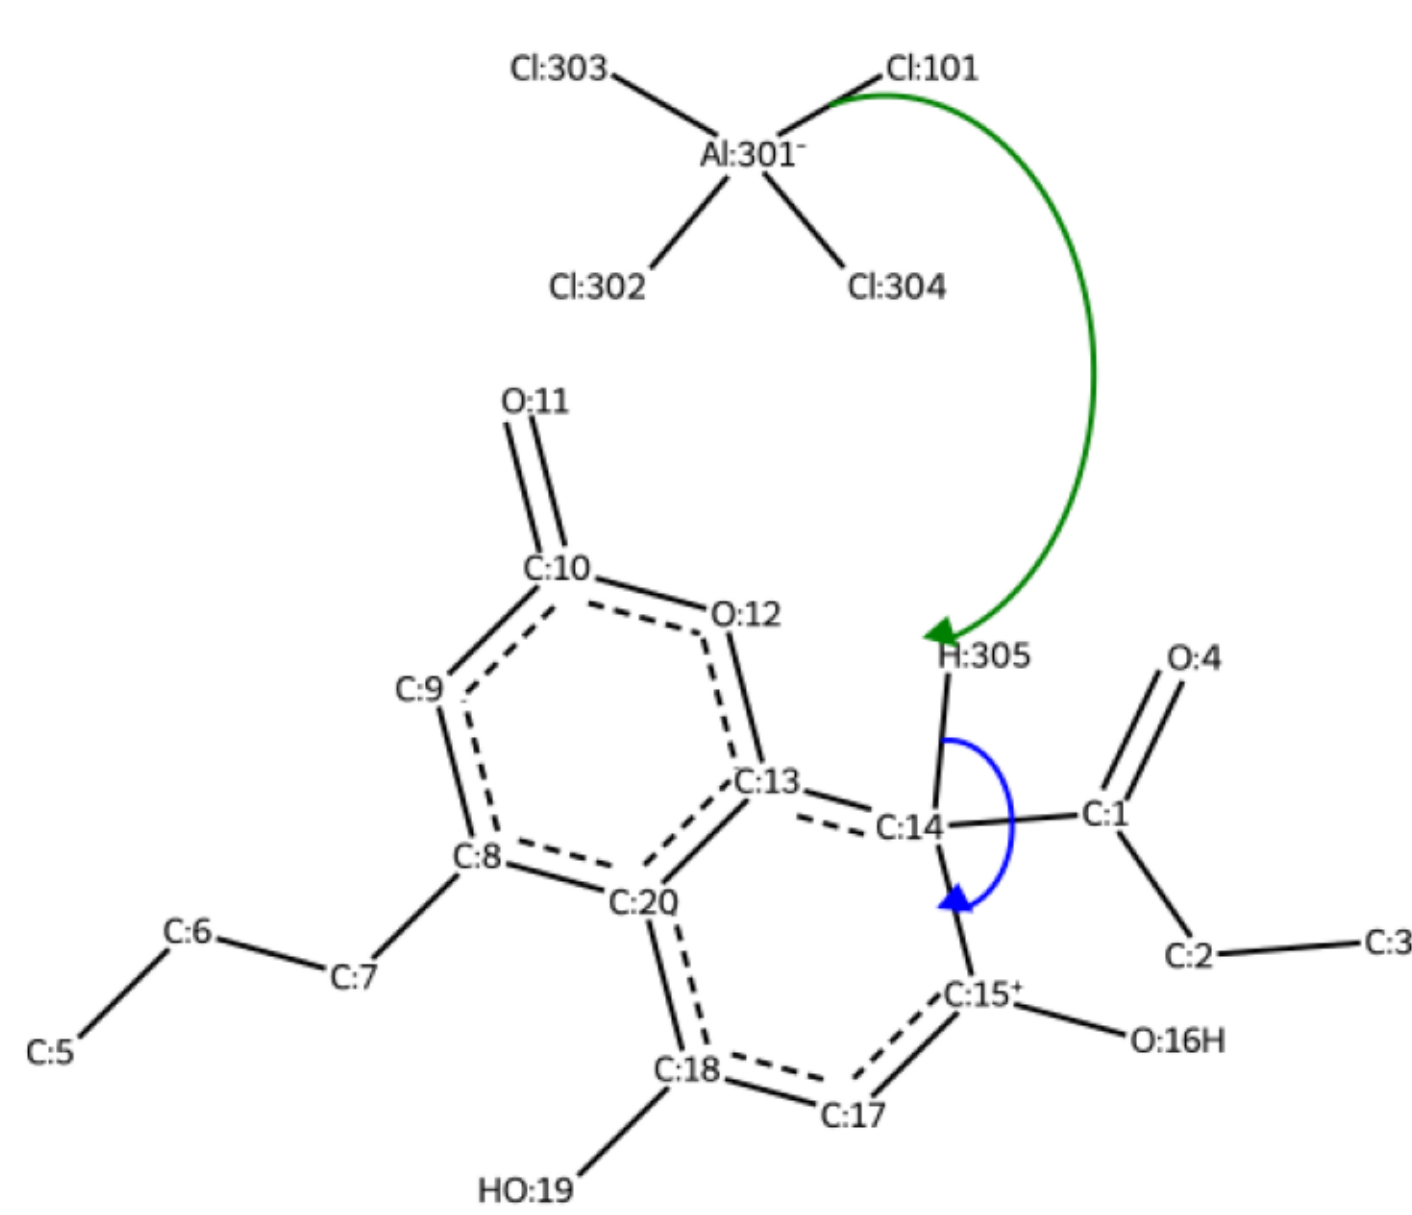

Product(s)

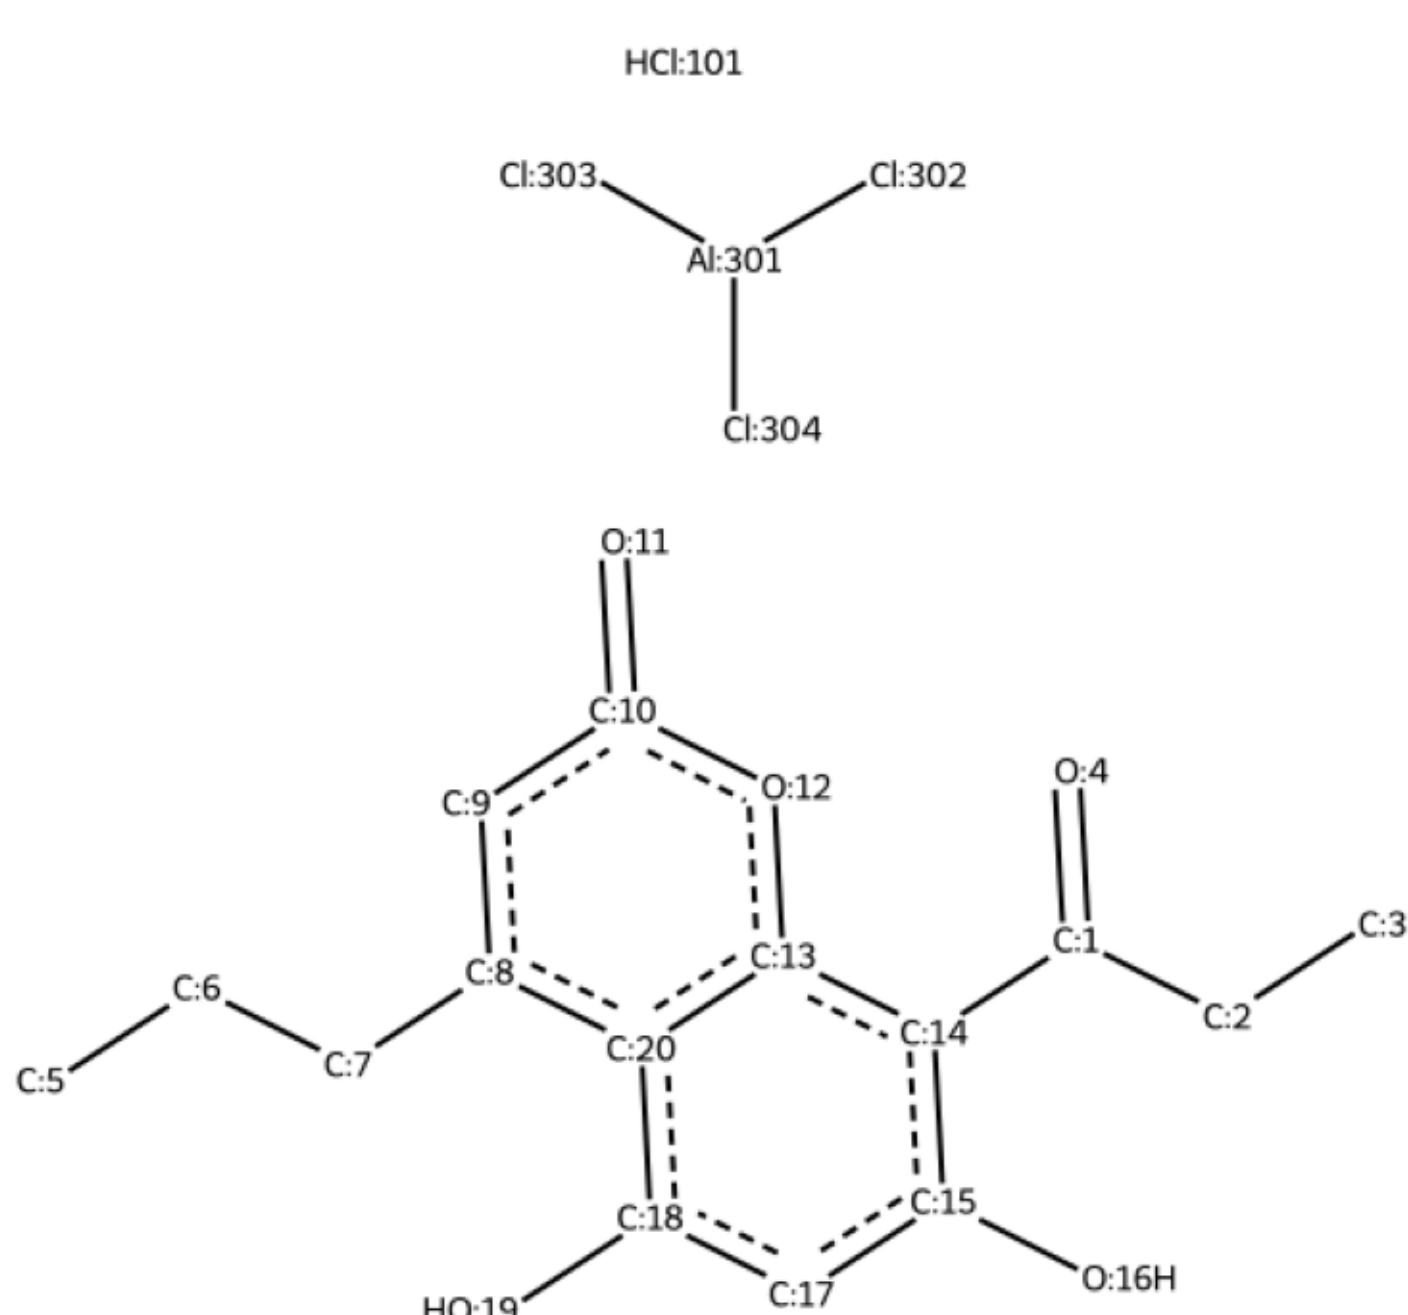



Original reaction  
sampled RXN\_ID:44)

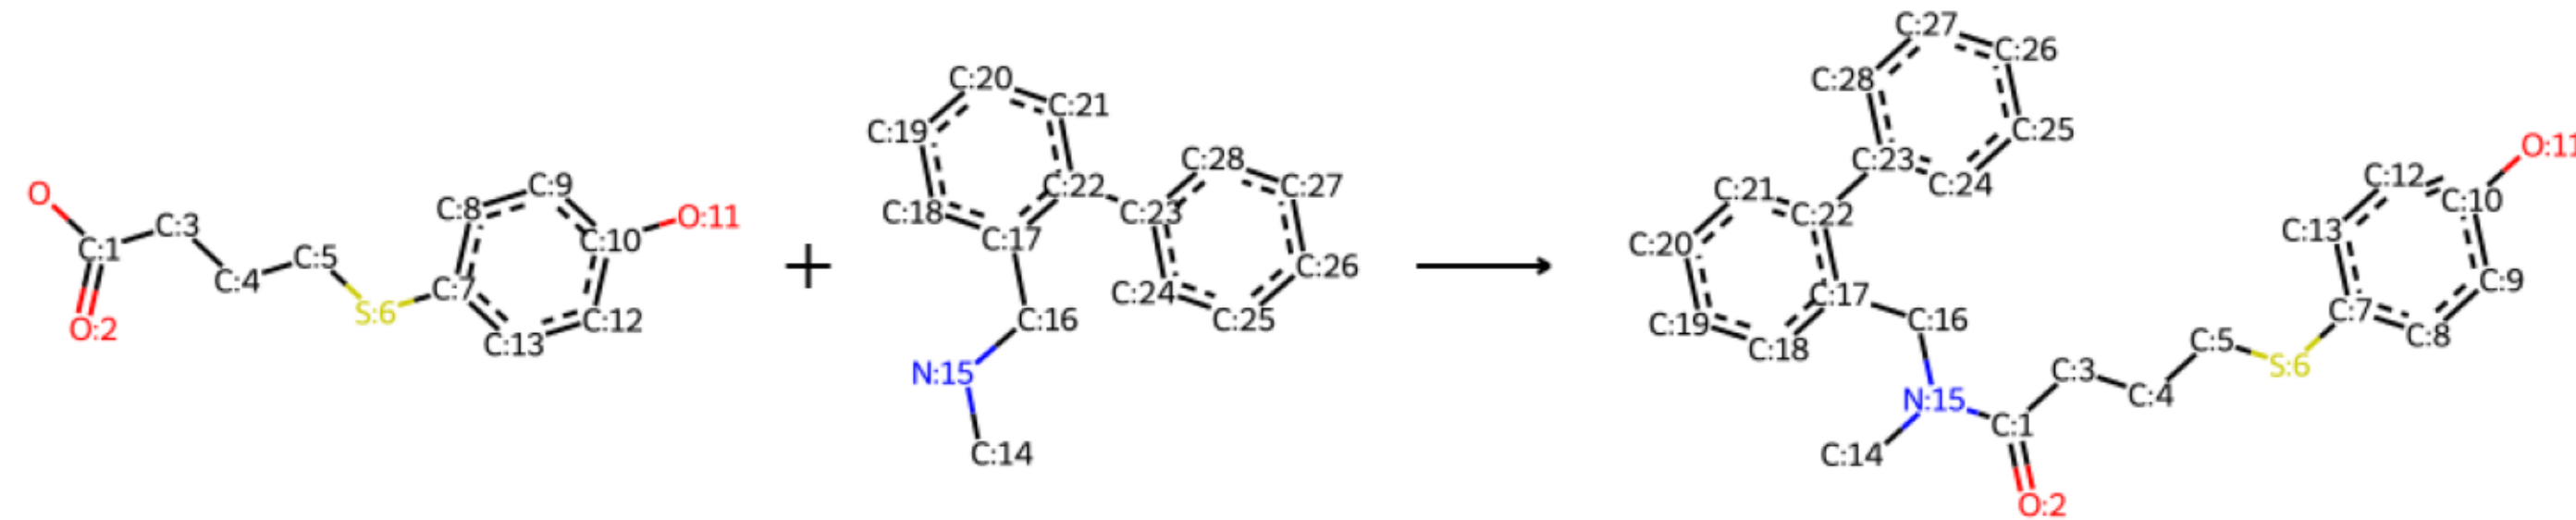

Identified mechanistic class -  
DCC\_condensation reaction

Reaction with missing reagents recovered

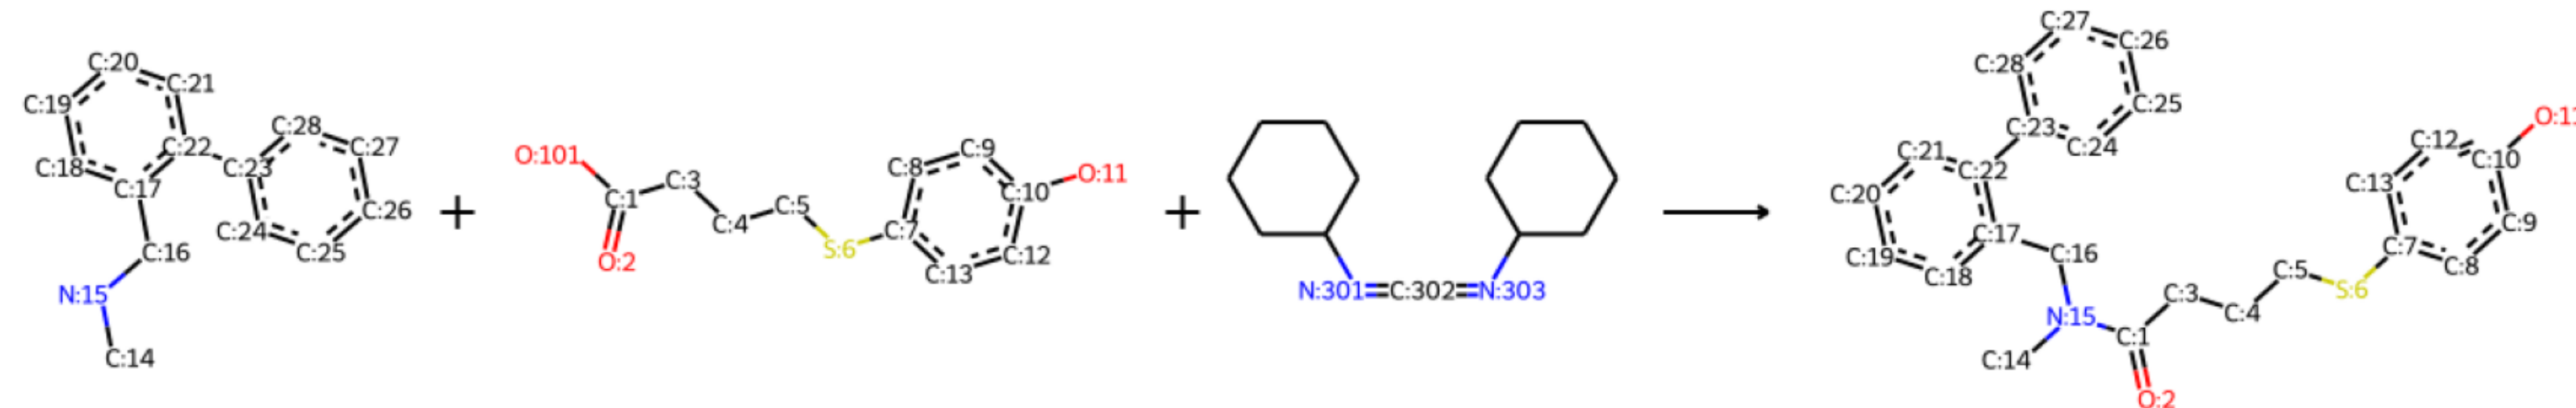

Proposed mechanistic pathway

[Arrow order: (1) green, (2) blue, (3) red, (4) orange]

step #1

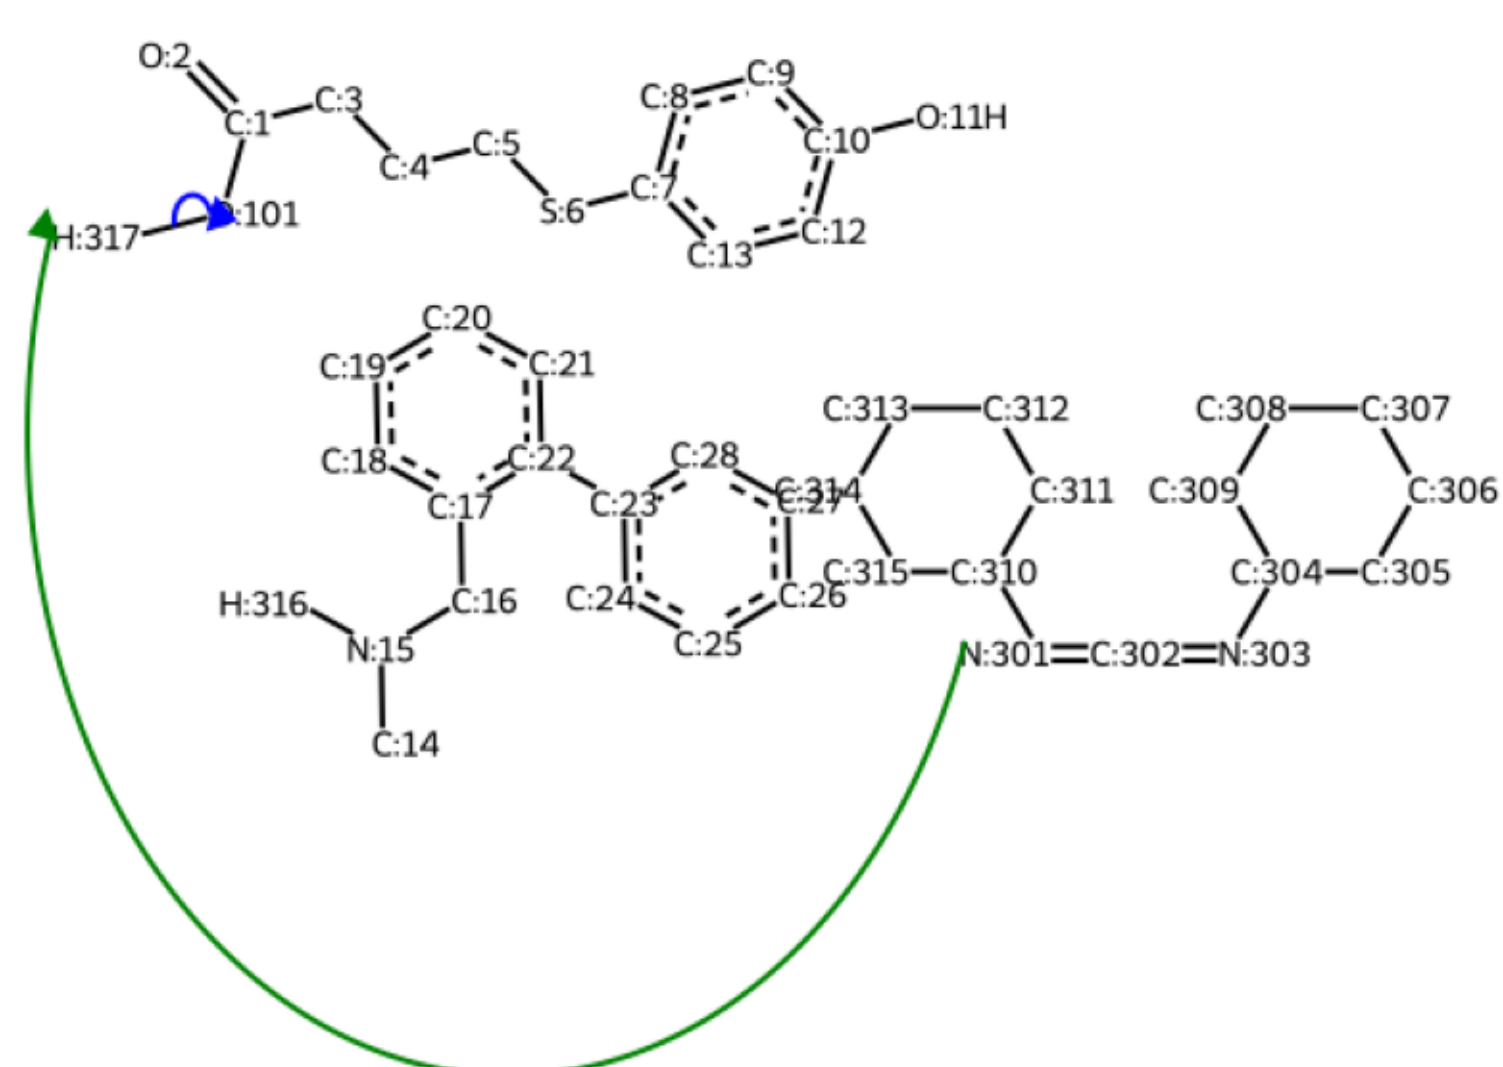

step #2

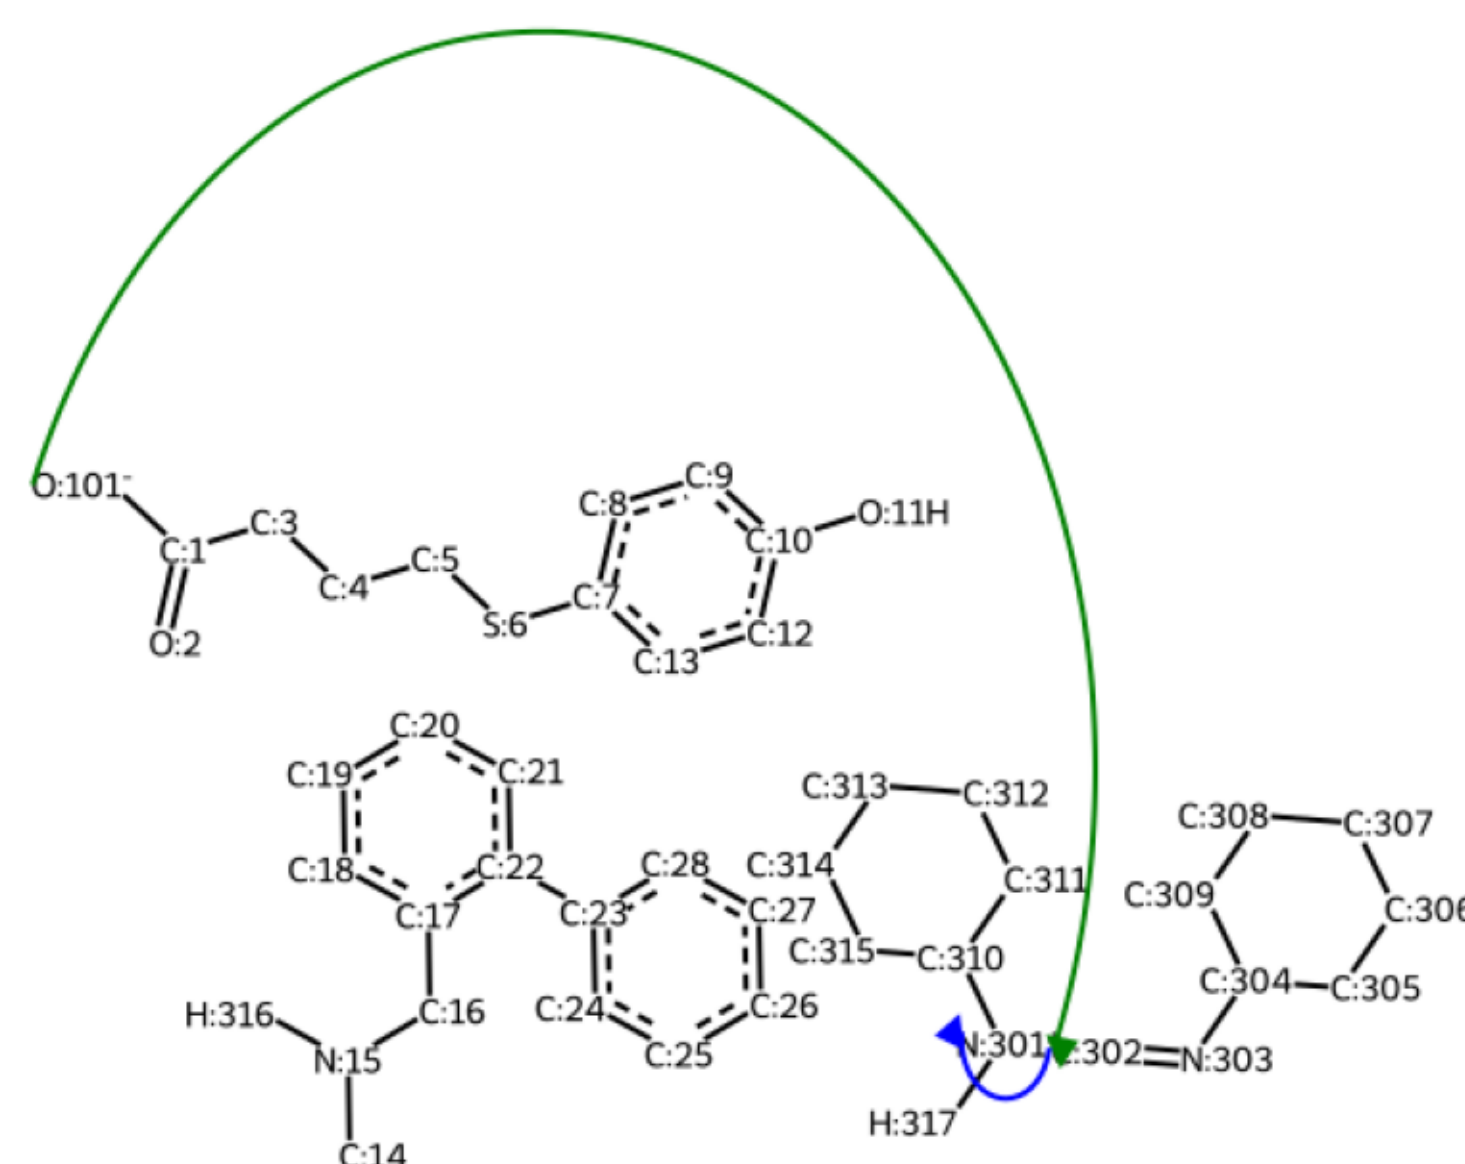

step #3

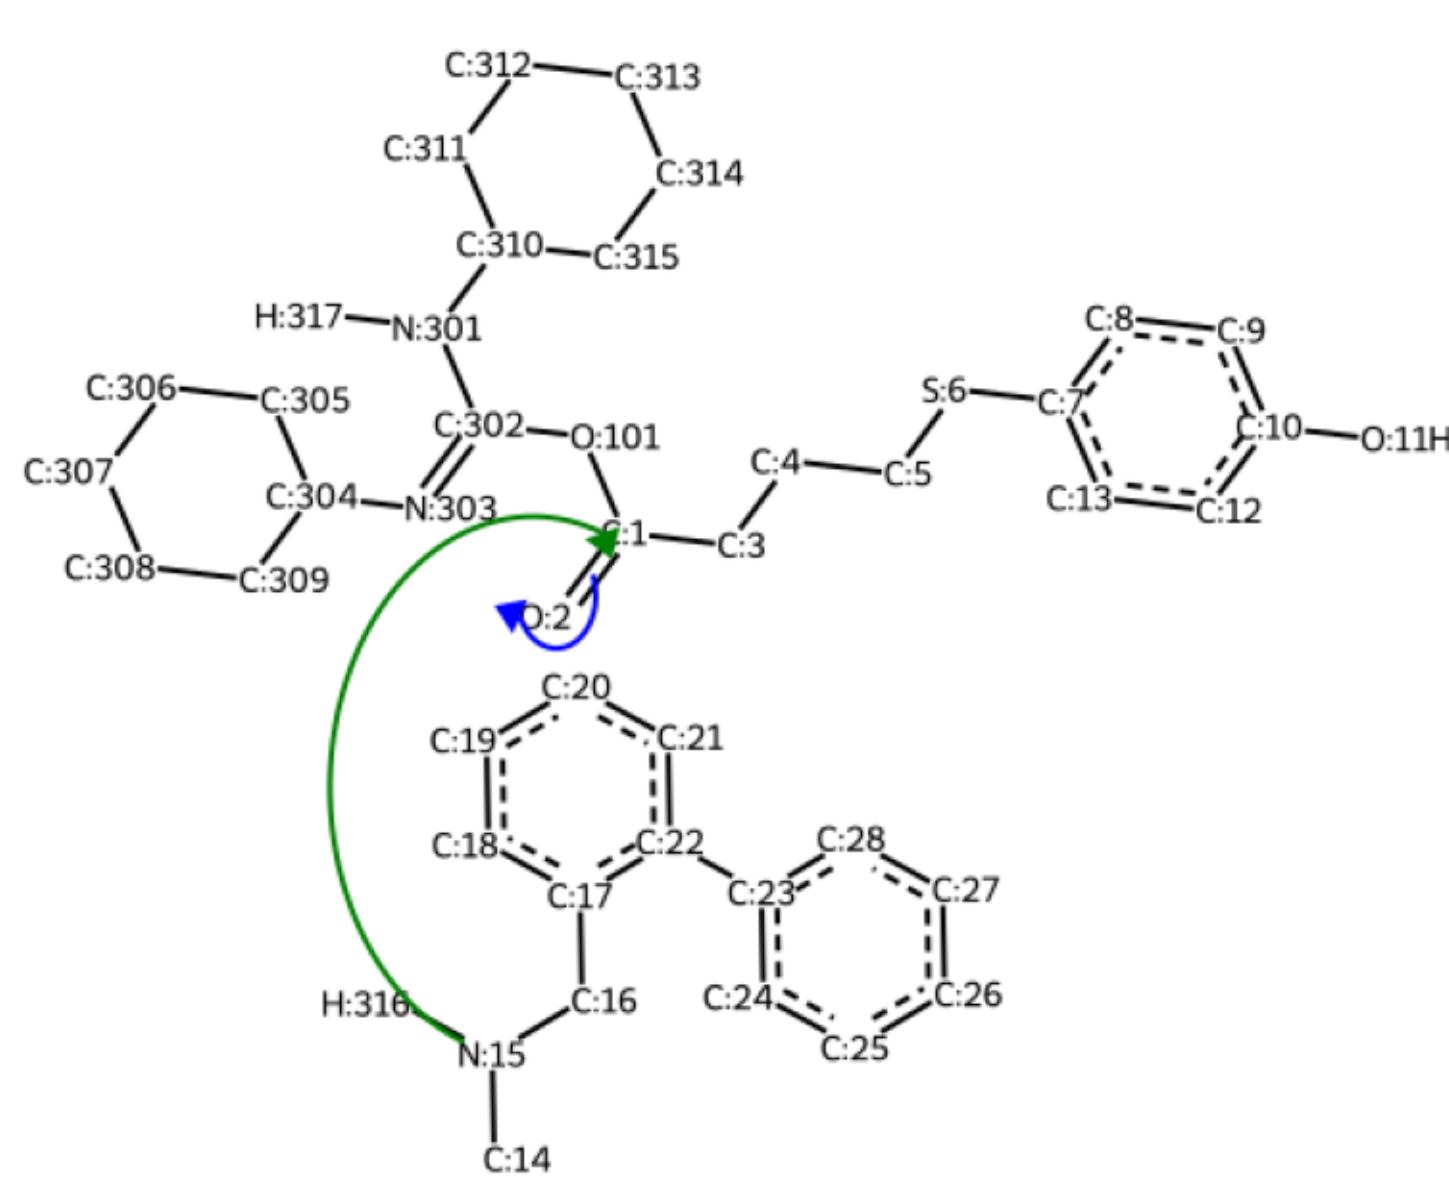

step #4

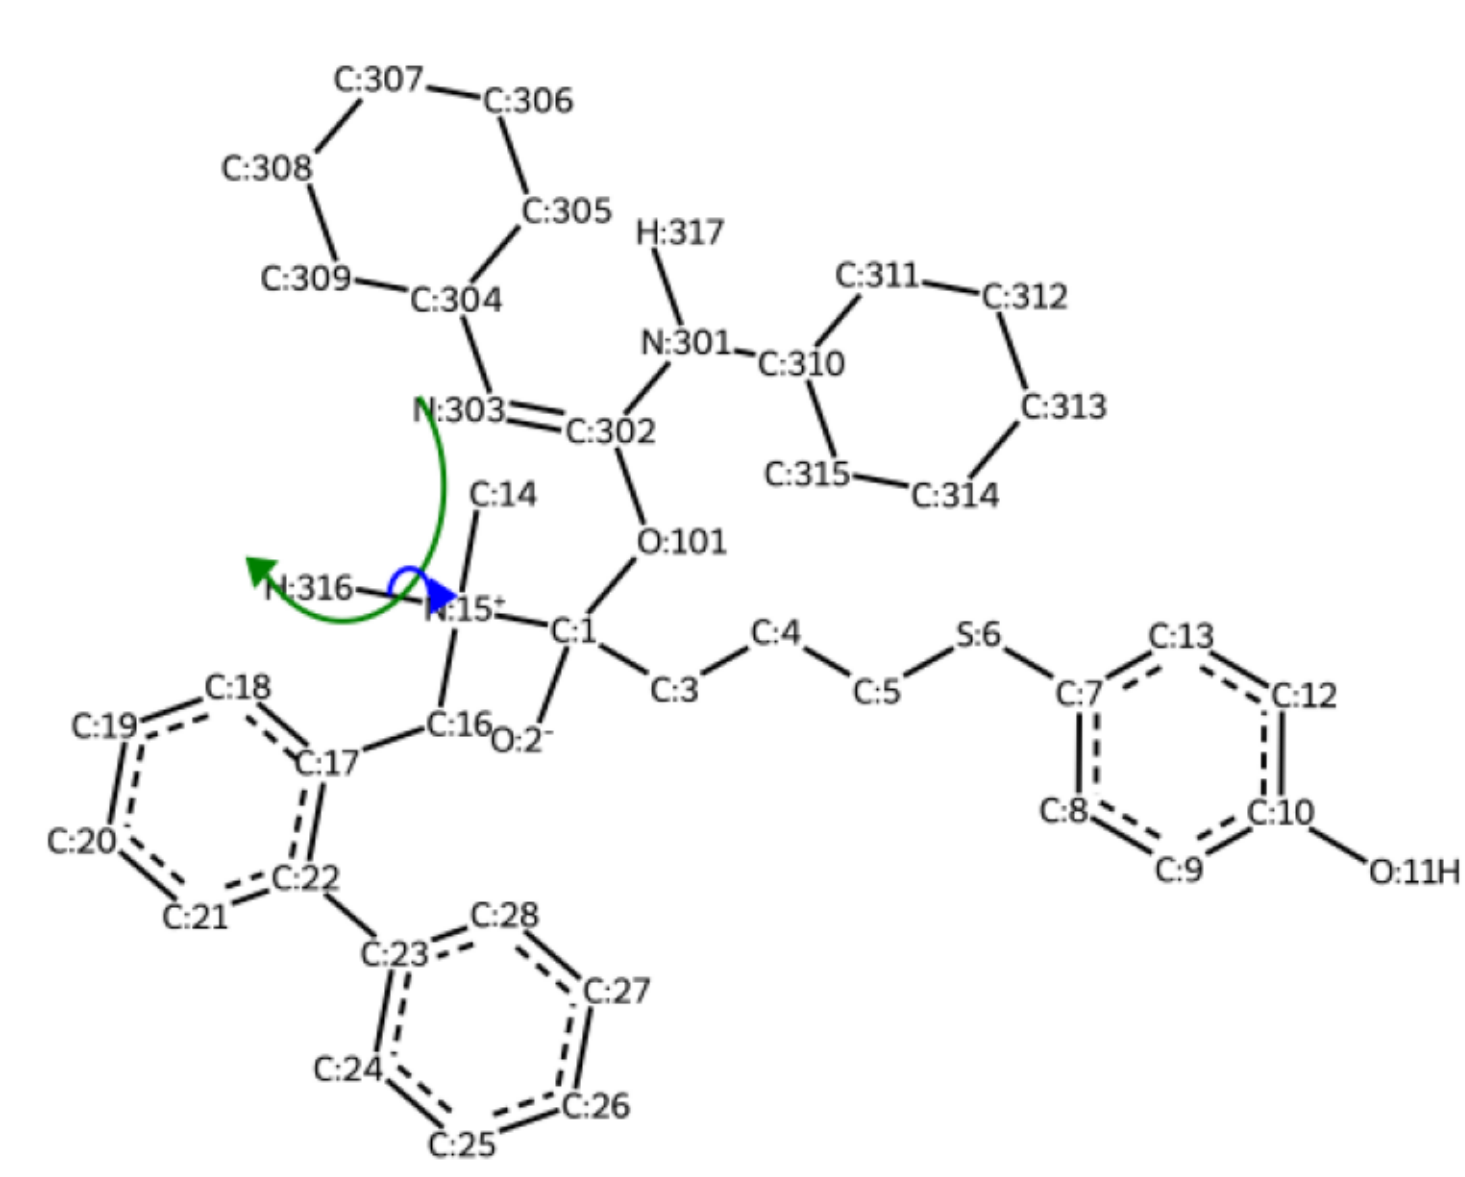

step #5

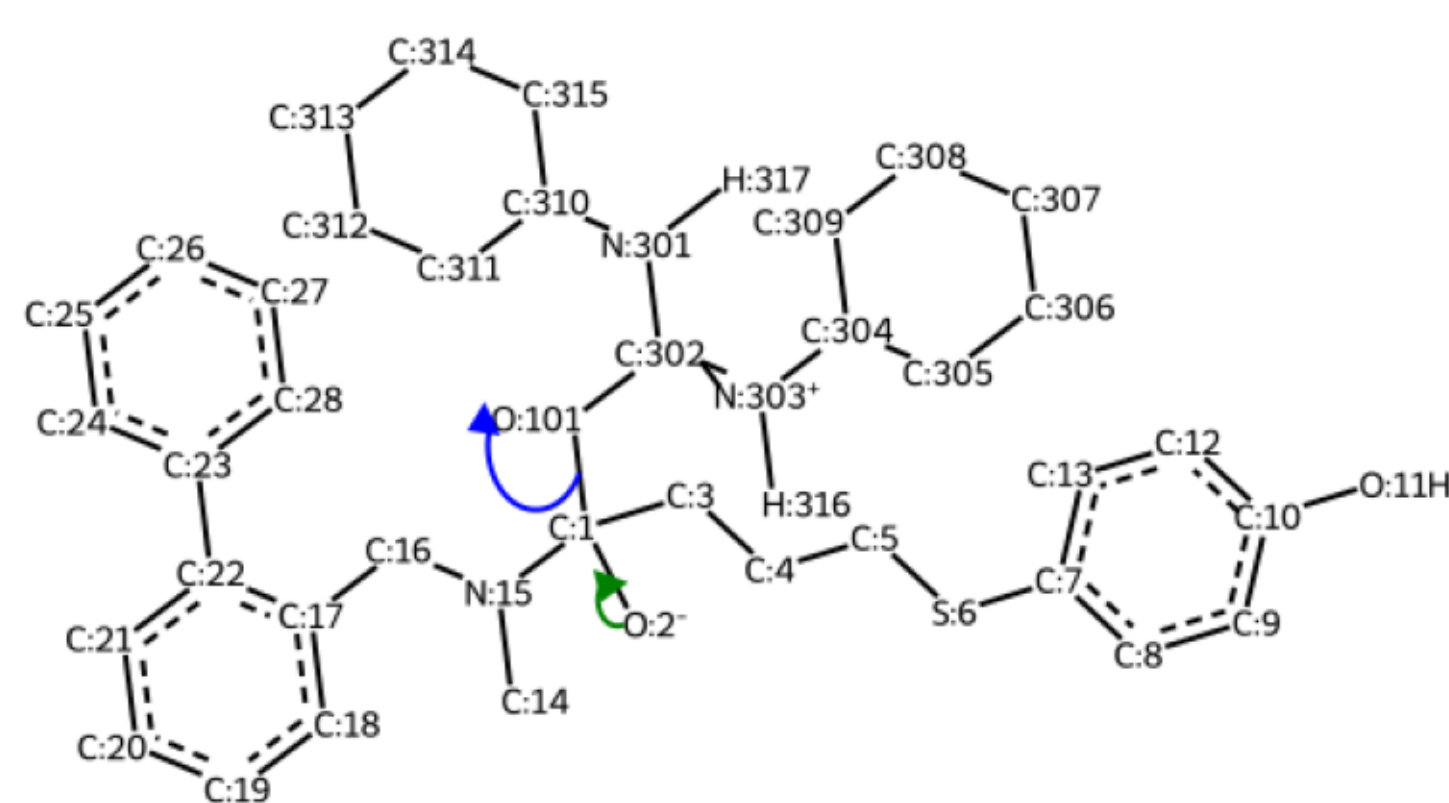

step #6

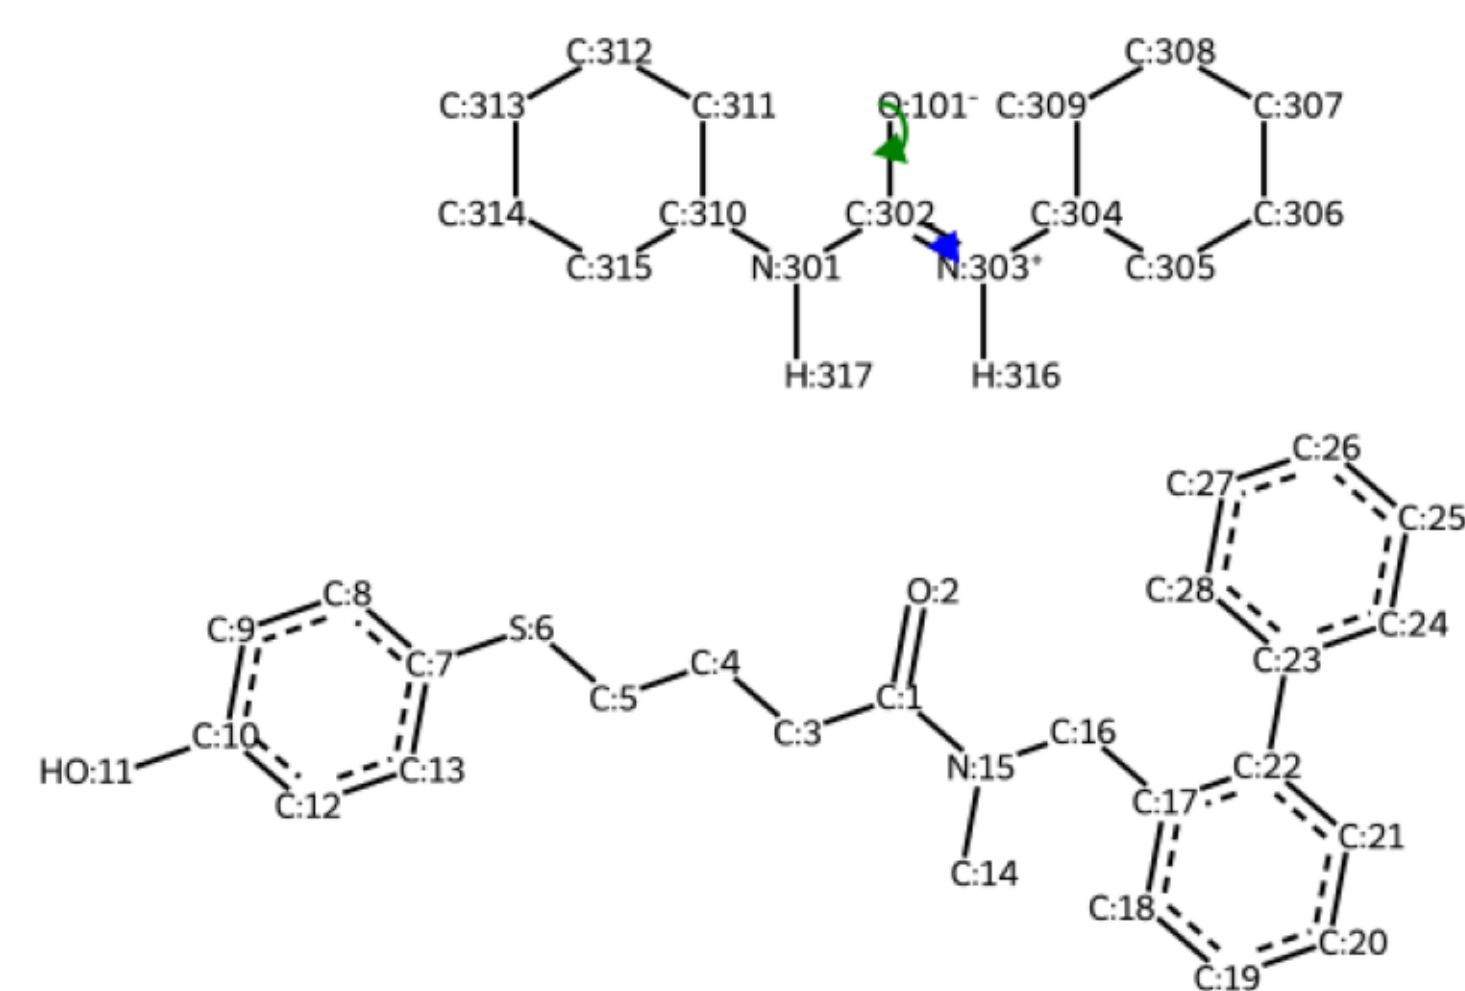

Product(s)

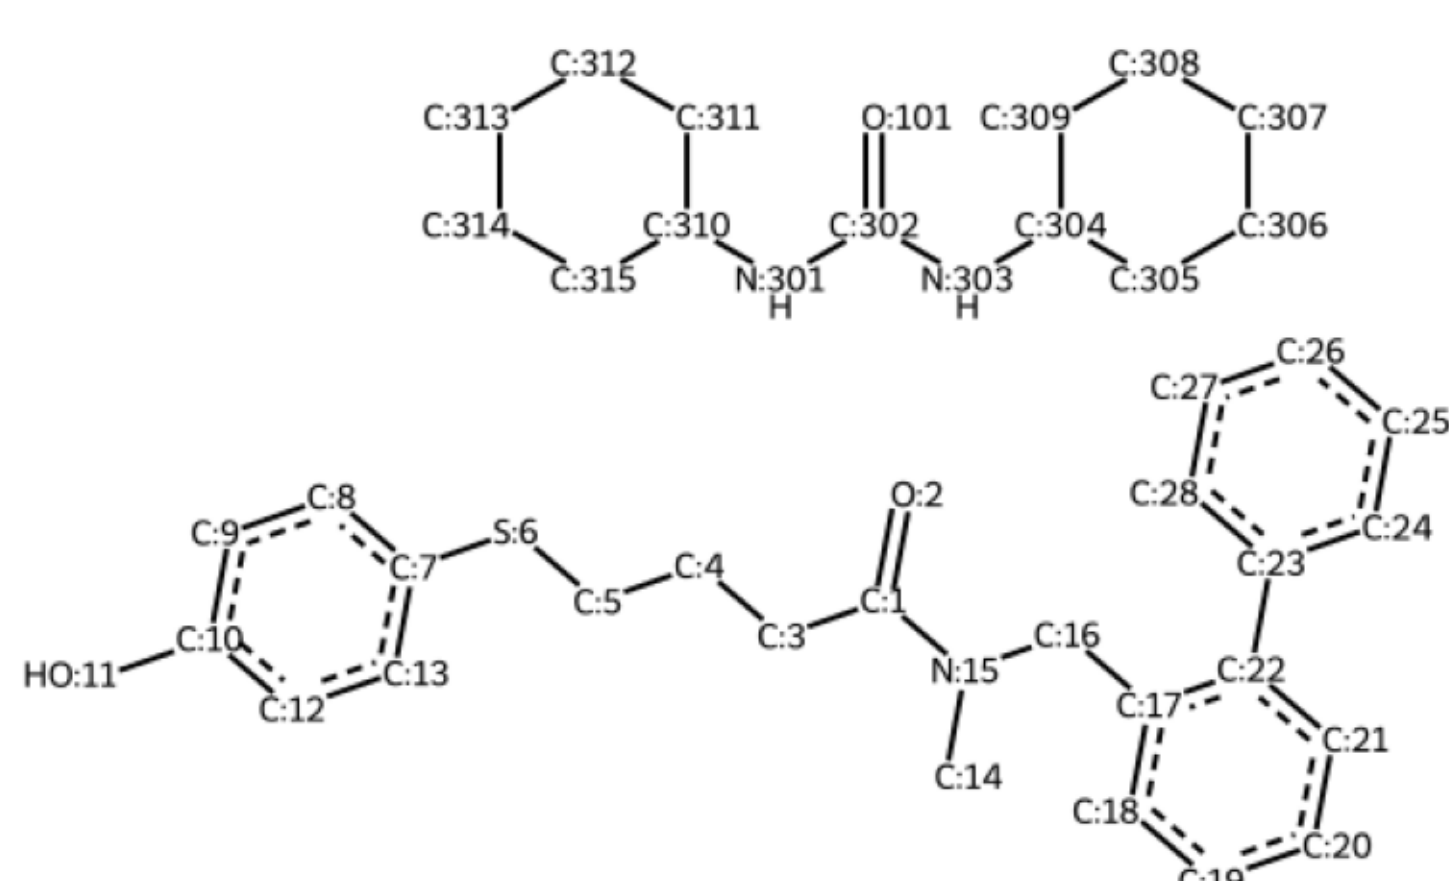



Original reaction  
sampled RXN\_ID:45)

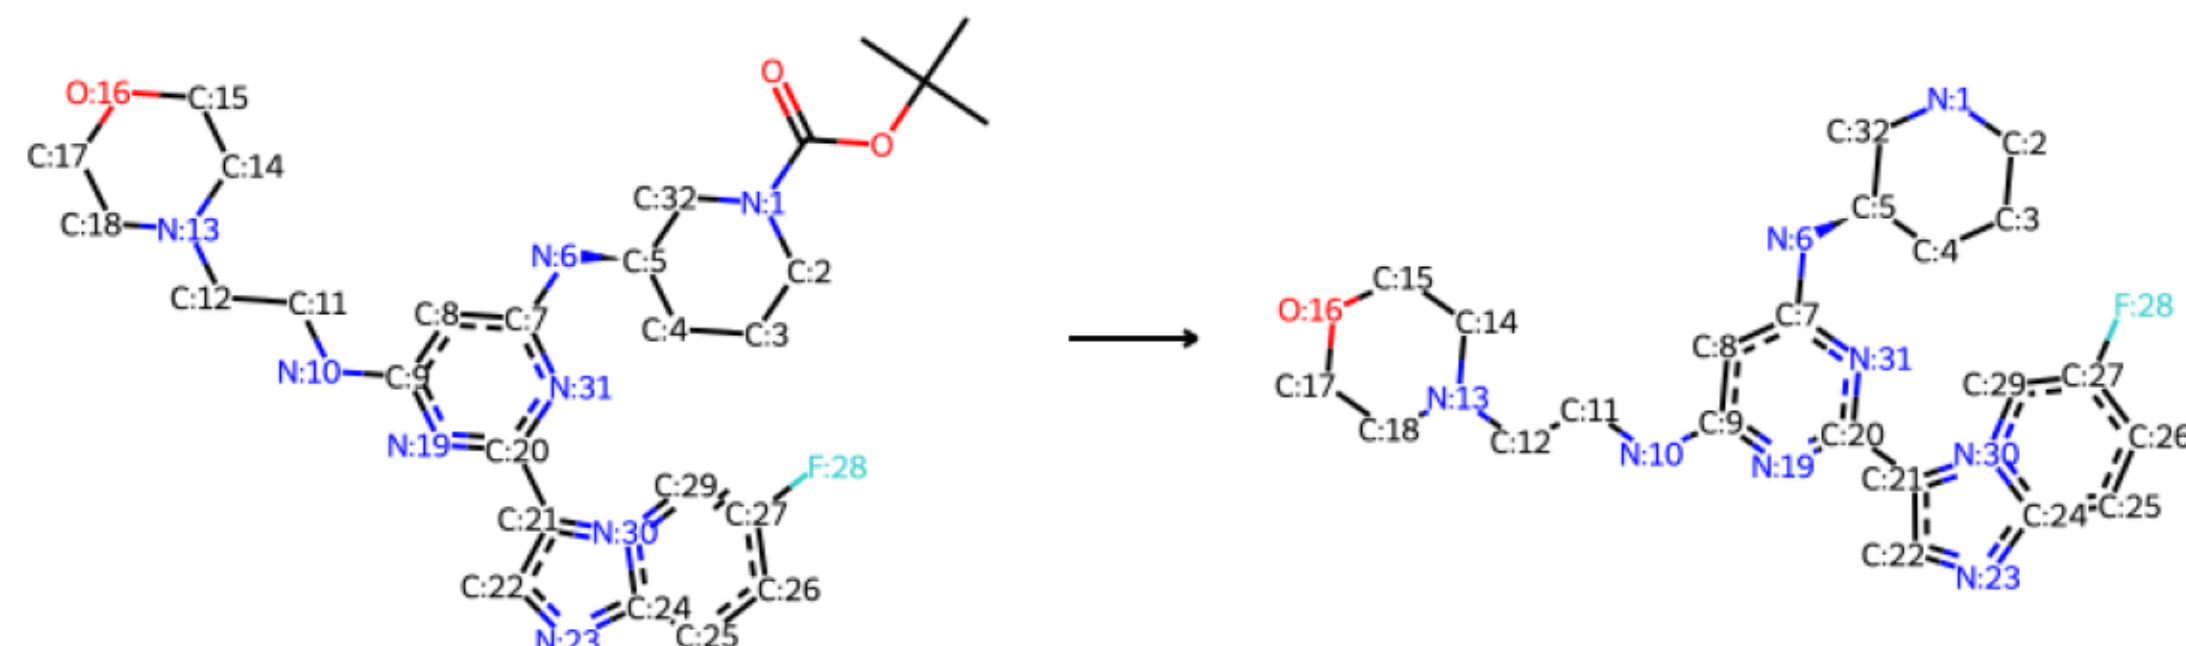

Identified mechanistic class -  
Boc\_deprotection reaction

Reaction with missing reagents recovered

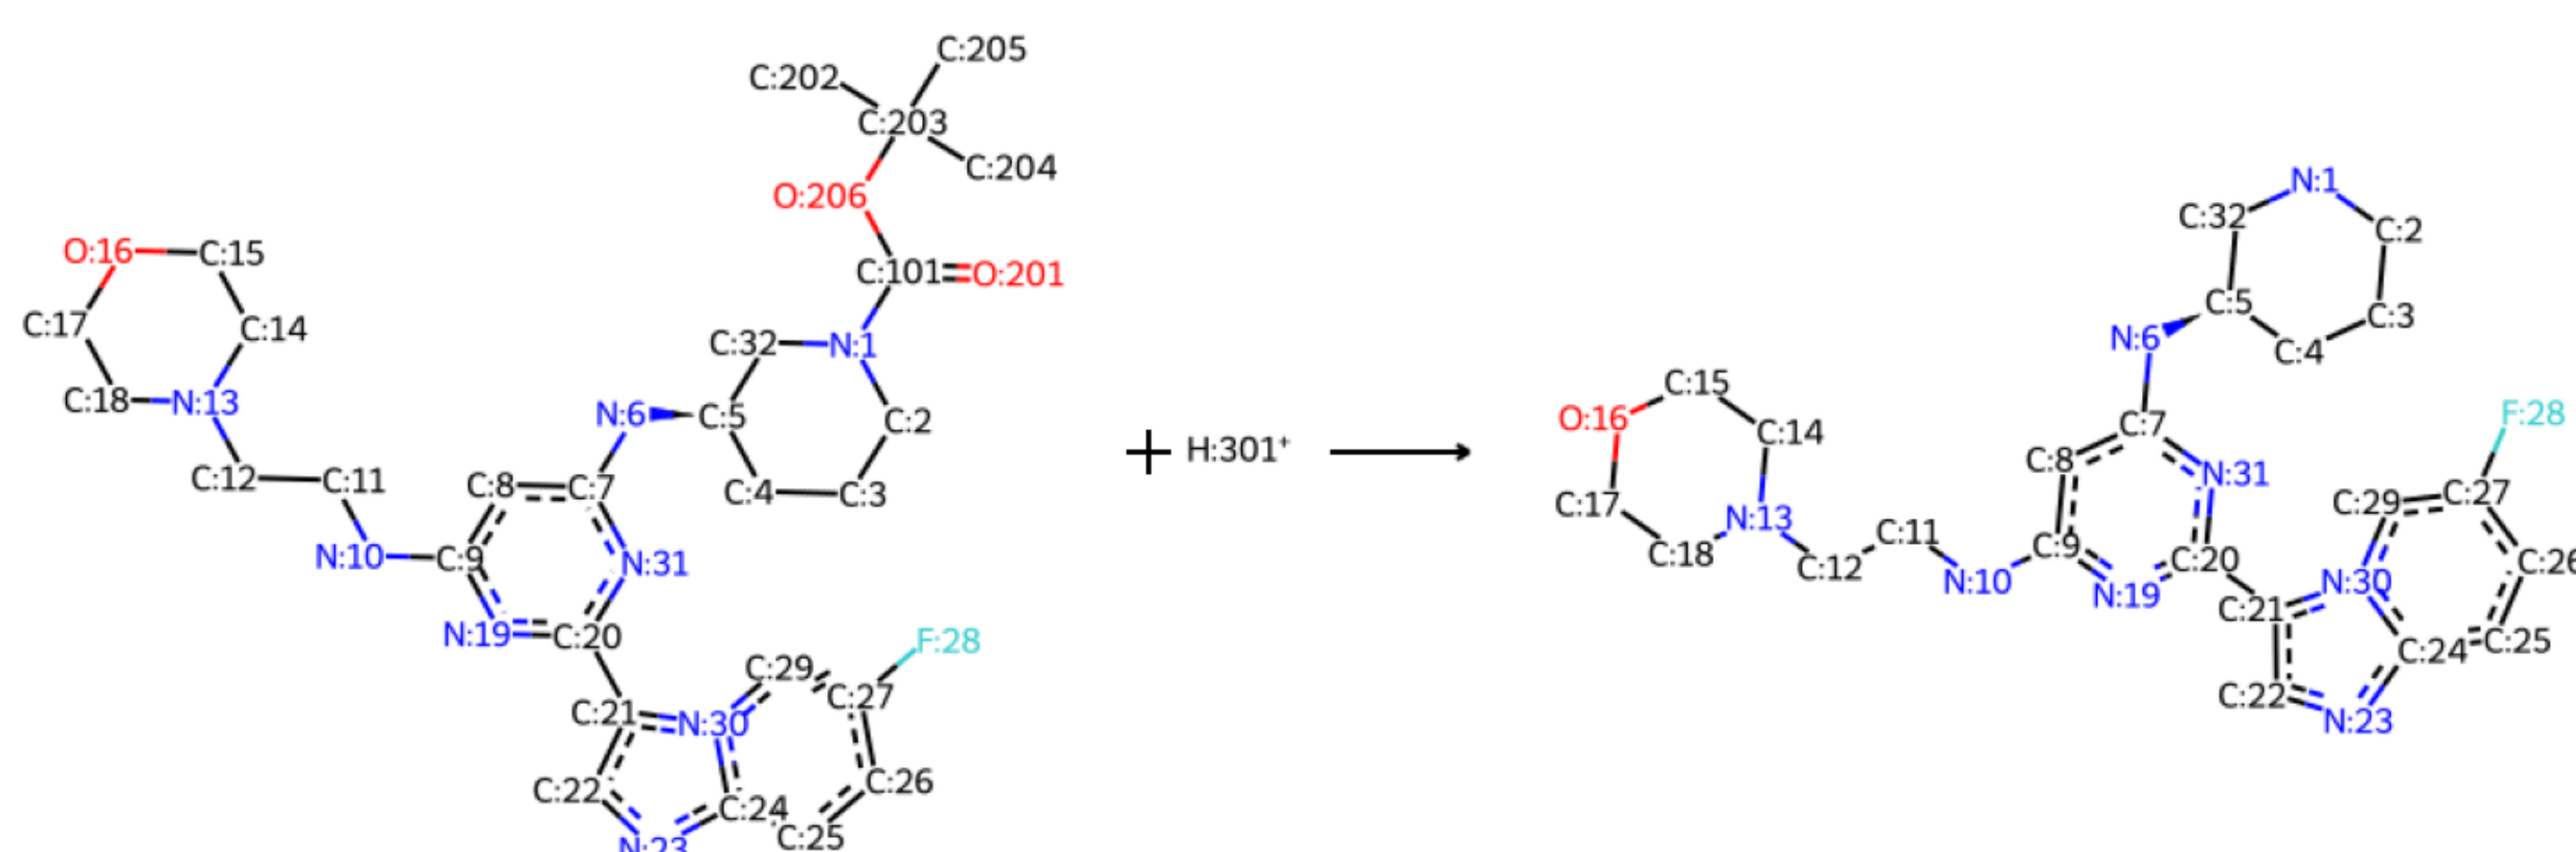

Proposed mechanistic pathway

[Arrow order: (1) green, (2) blue, (3) red, (4) orange]

step #1

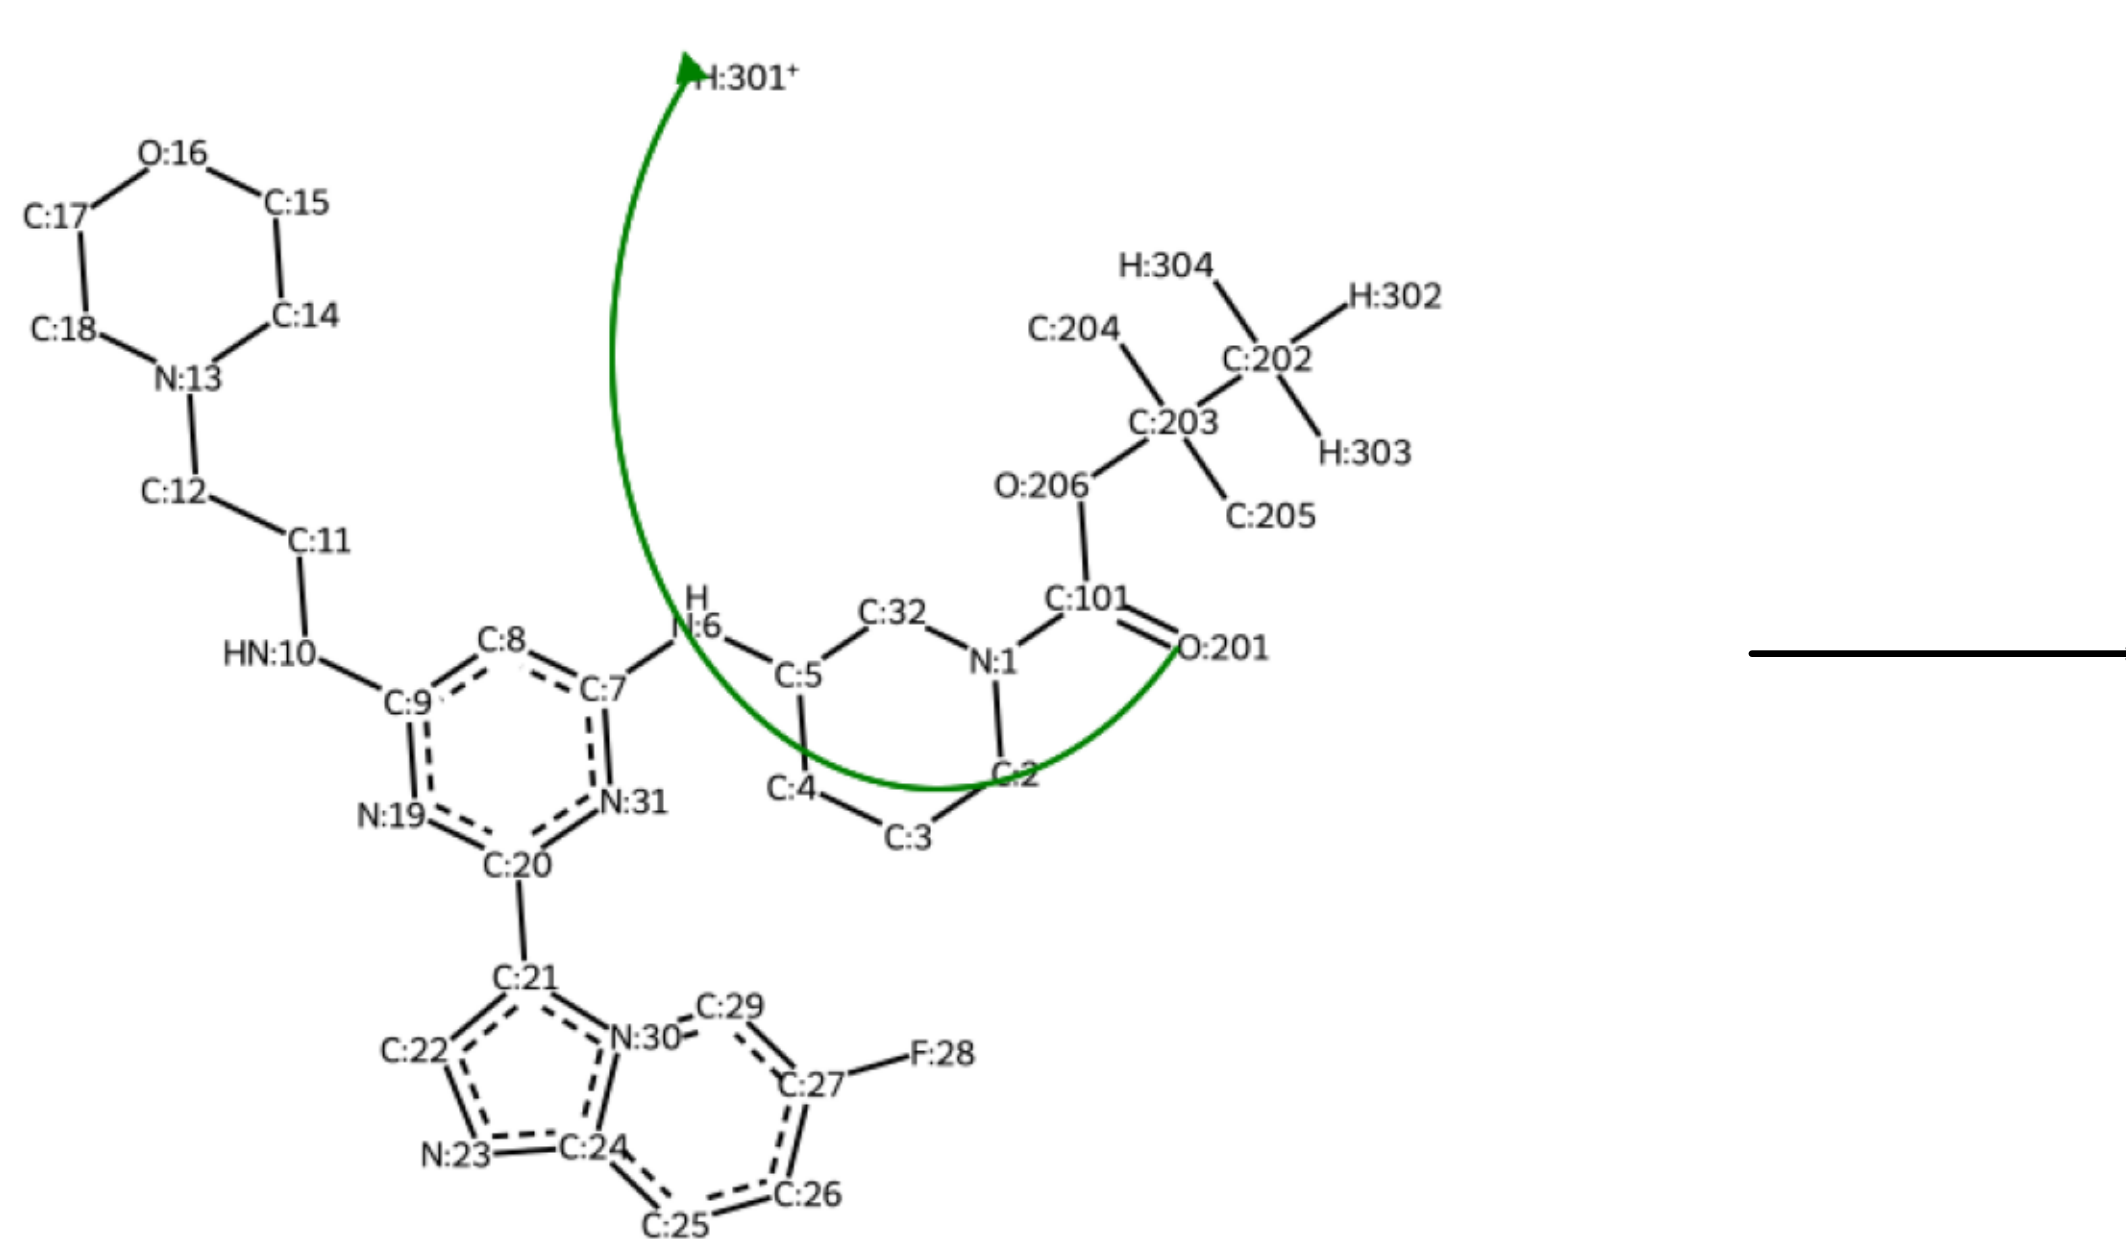

step #2

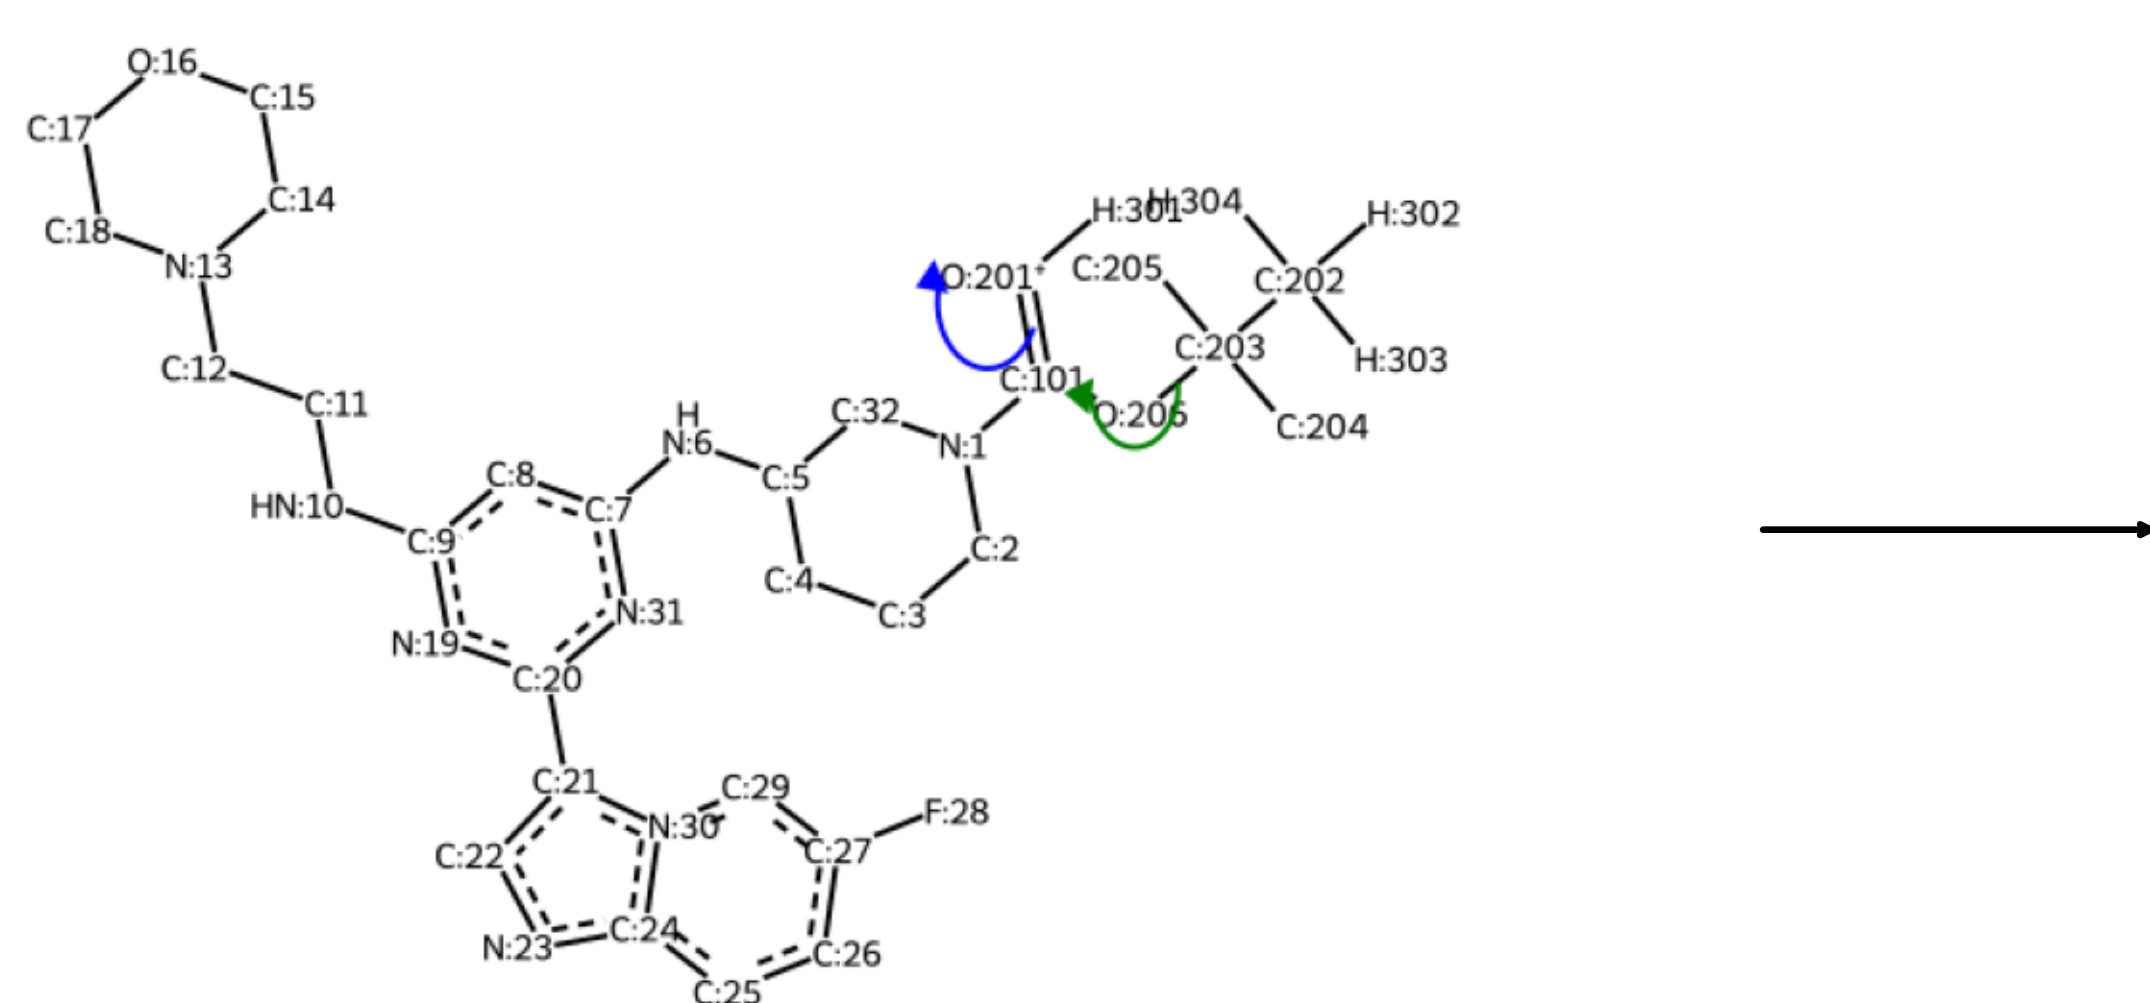

step #3

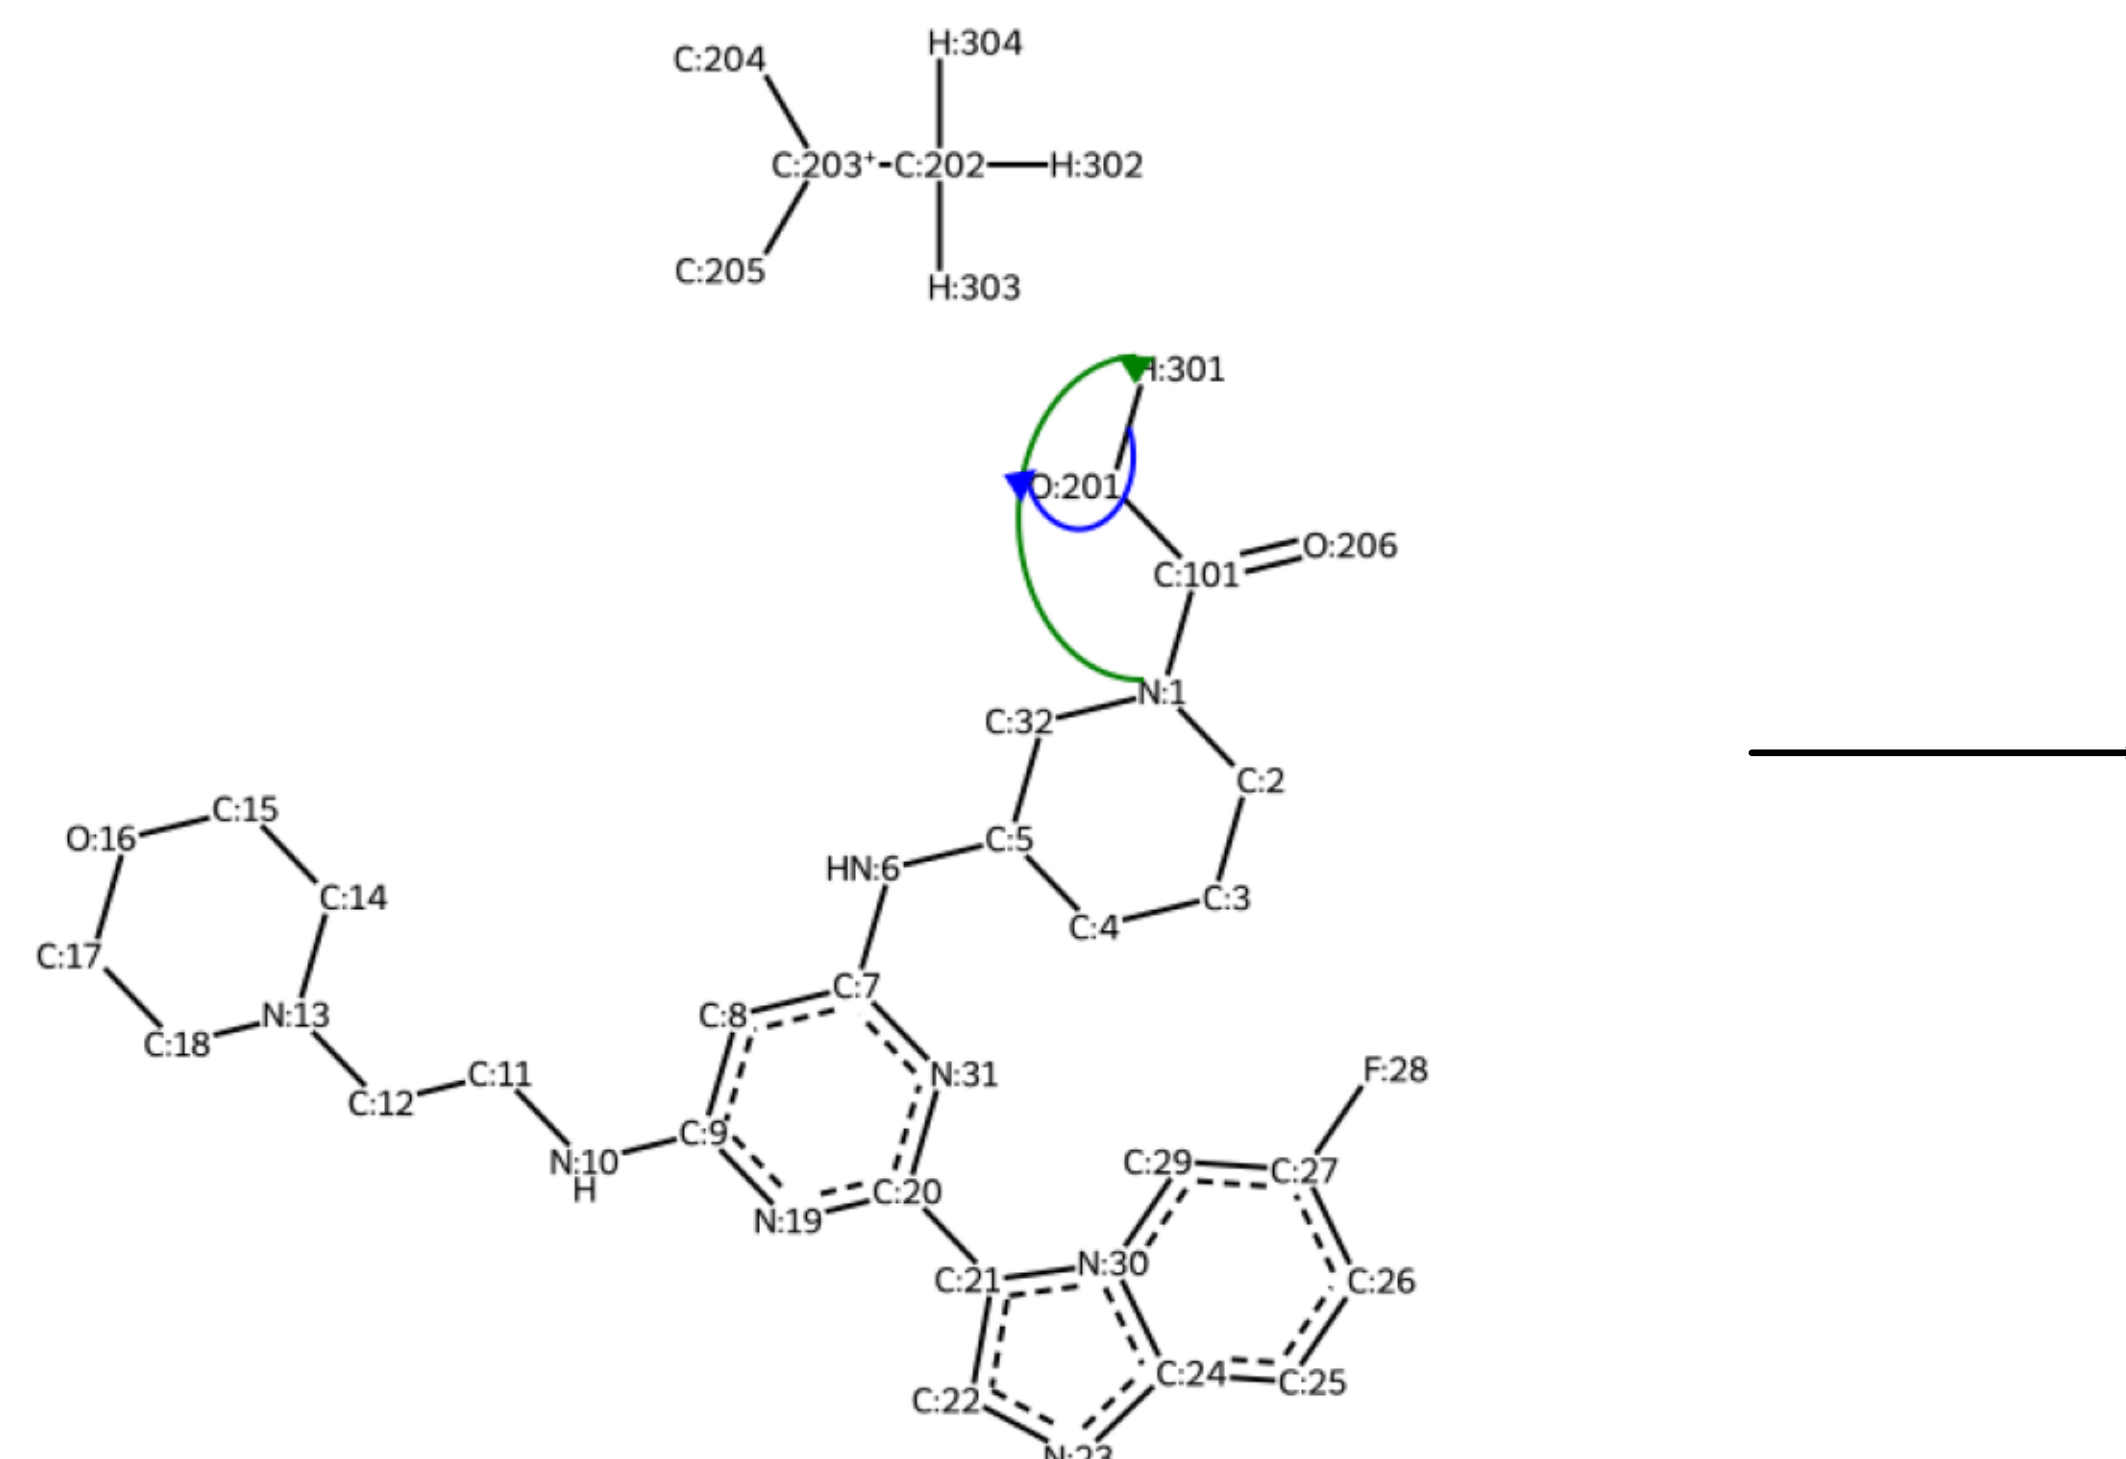

step #4

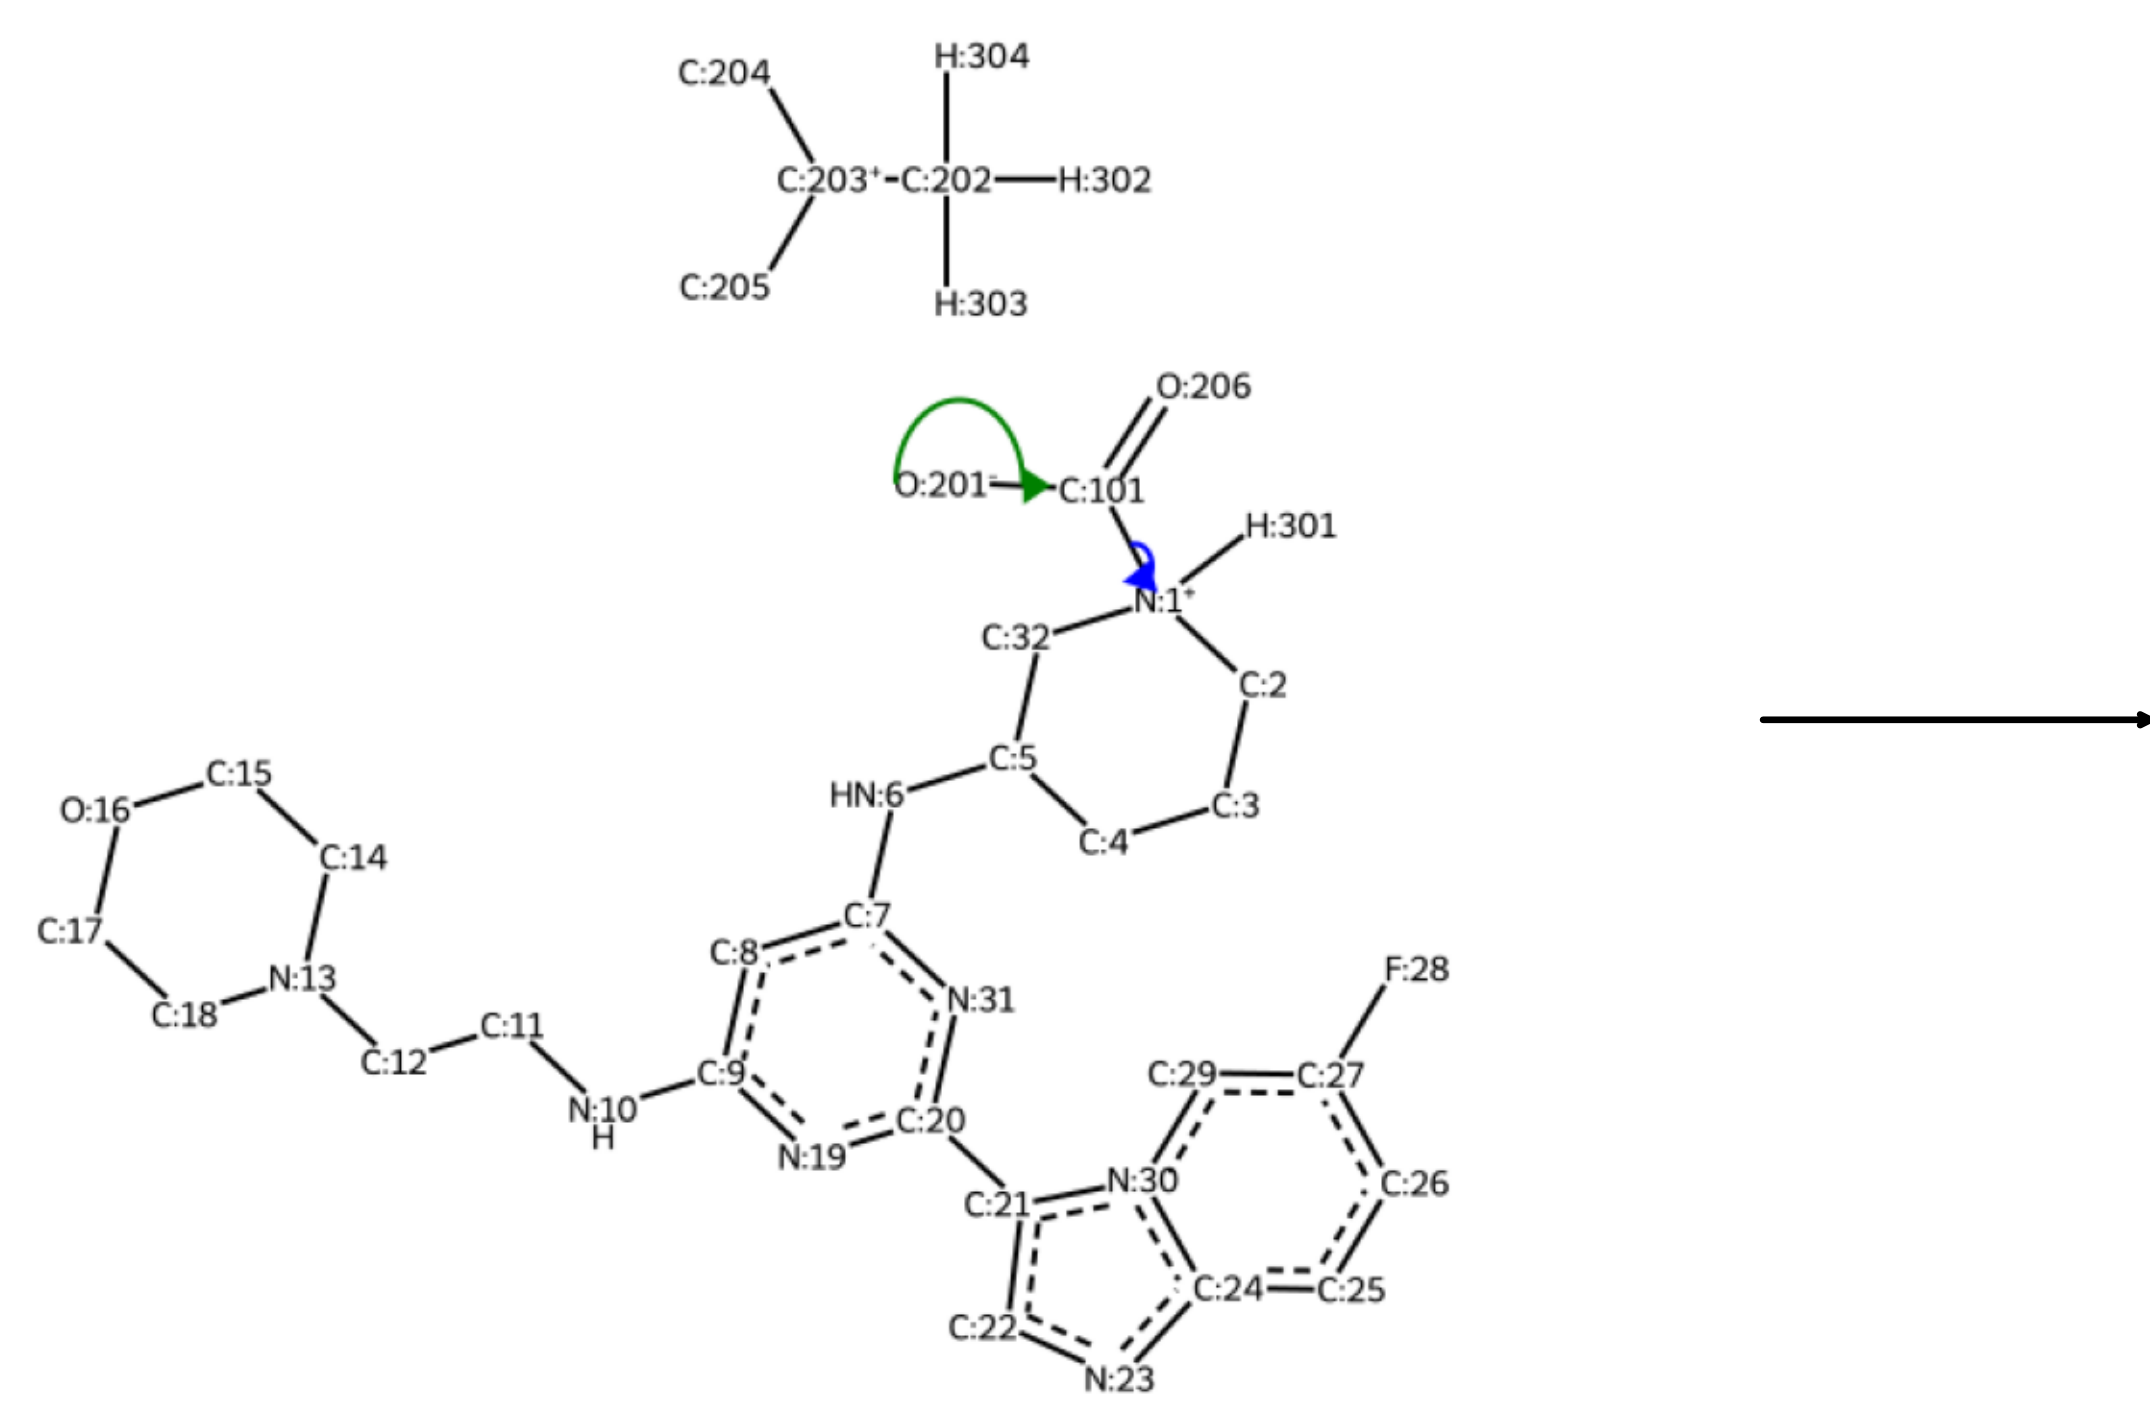

step #5

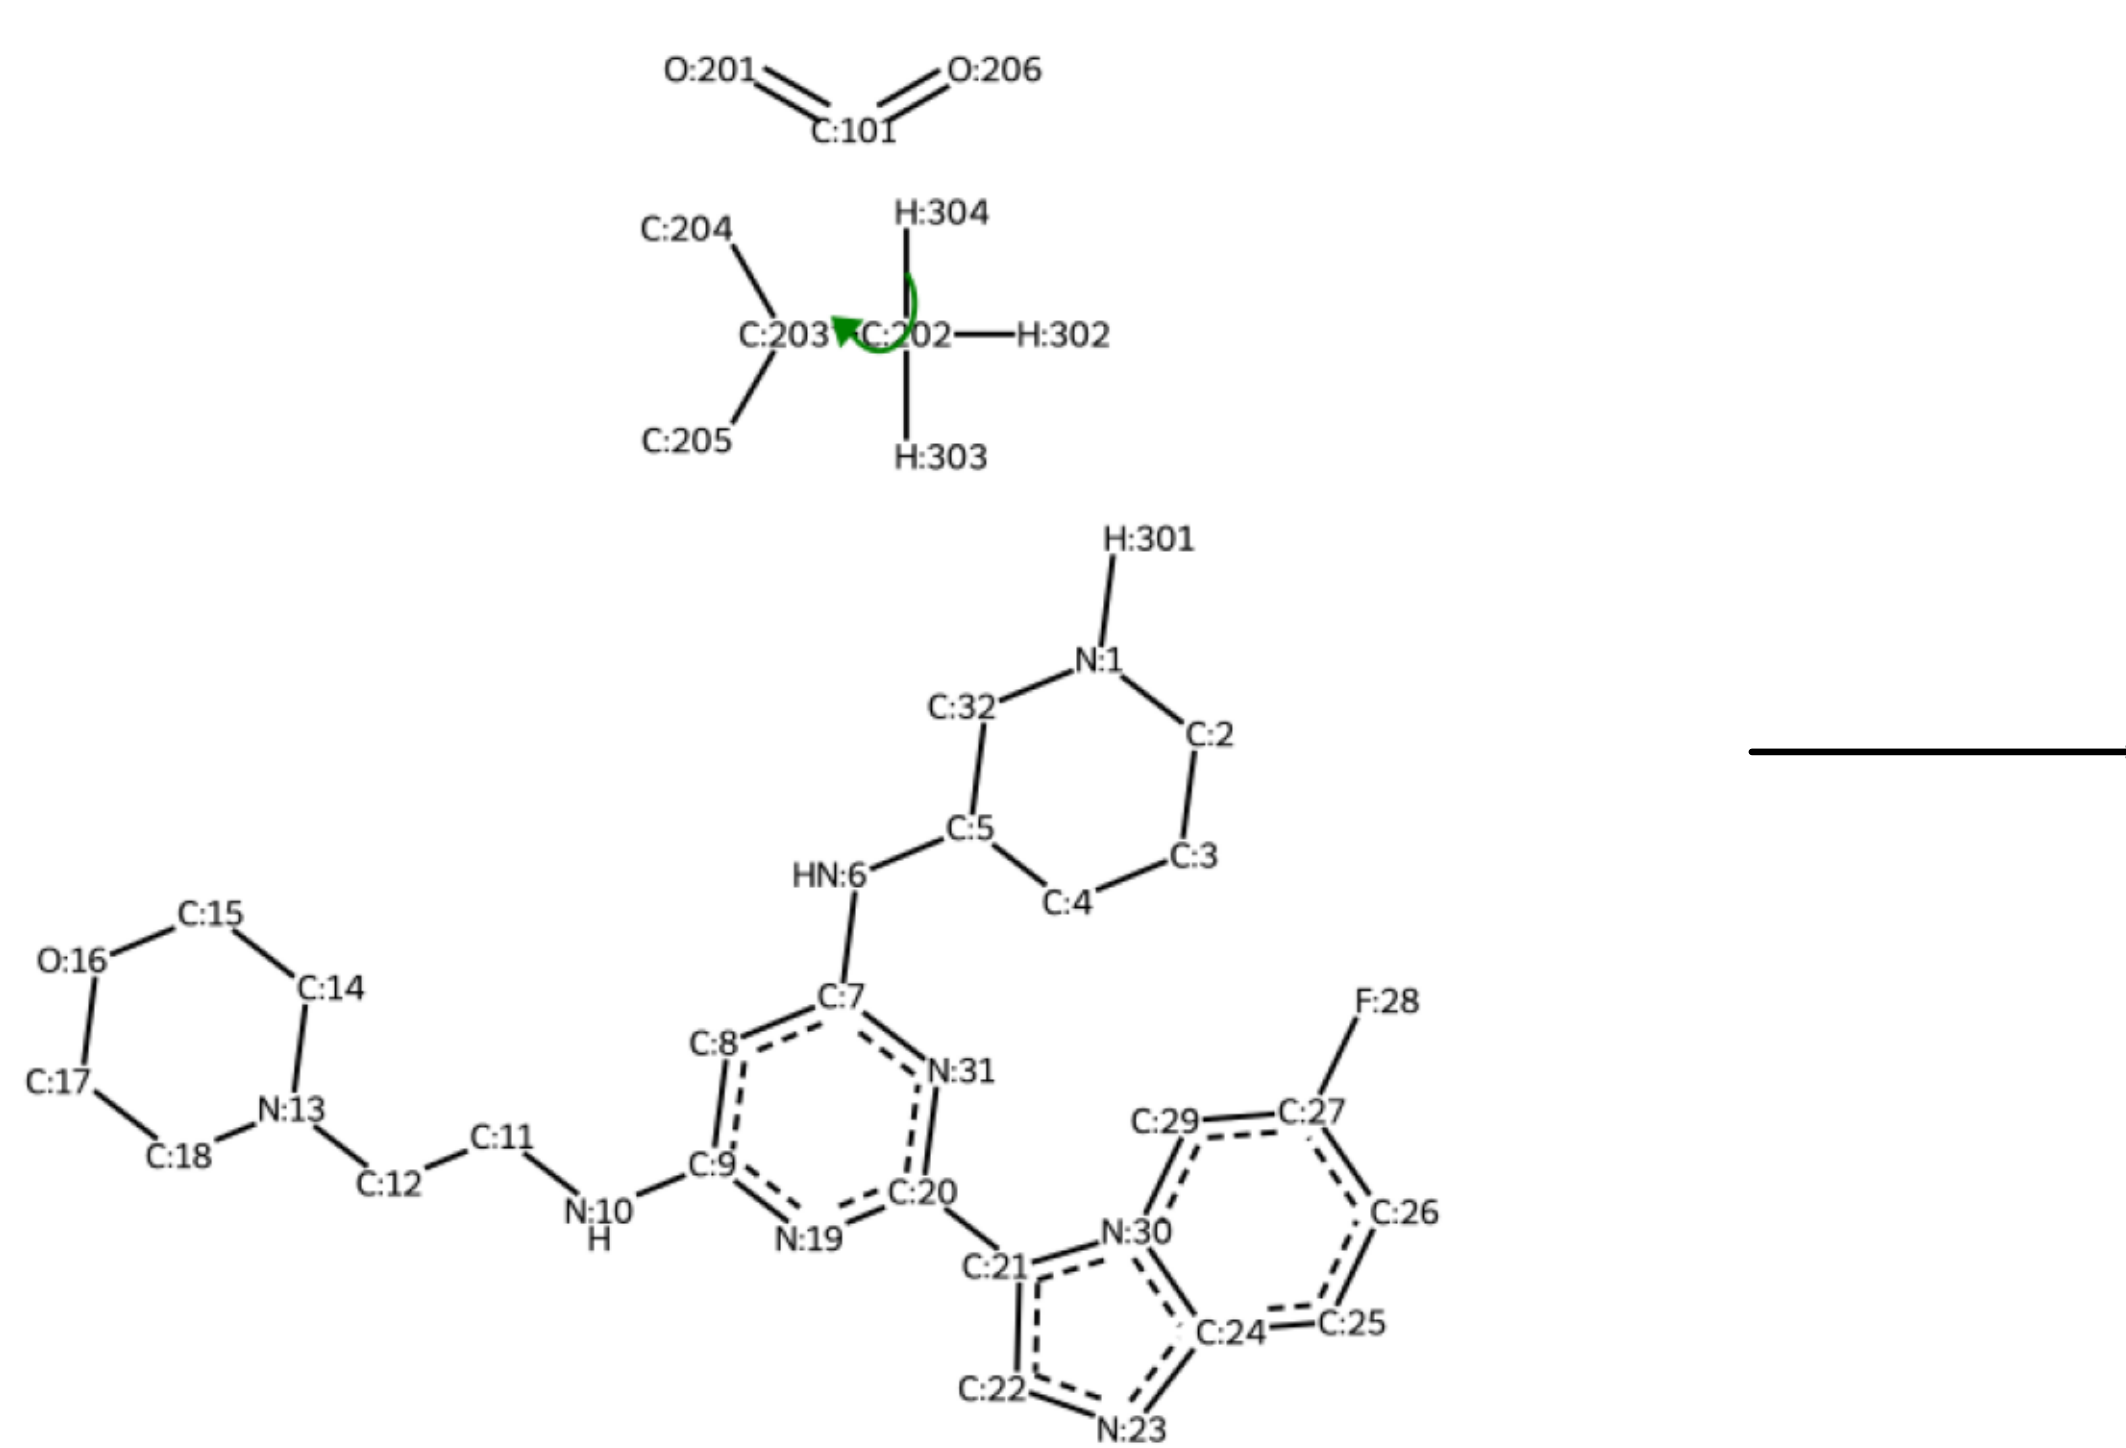

Product(s)

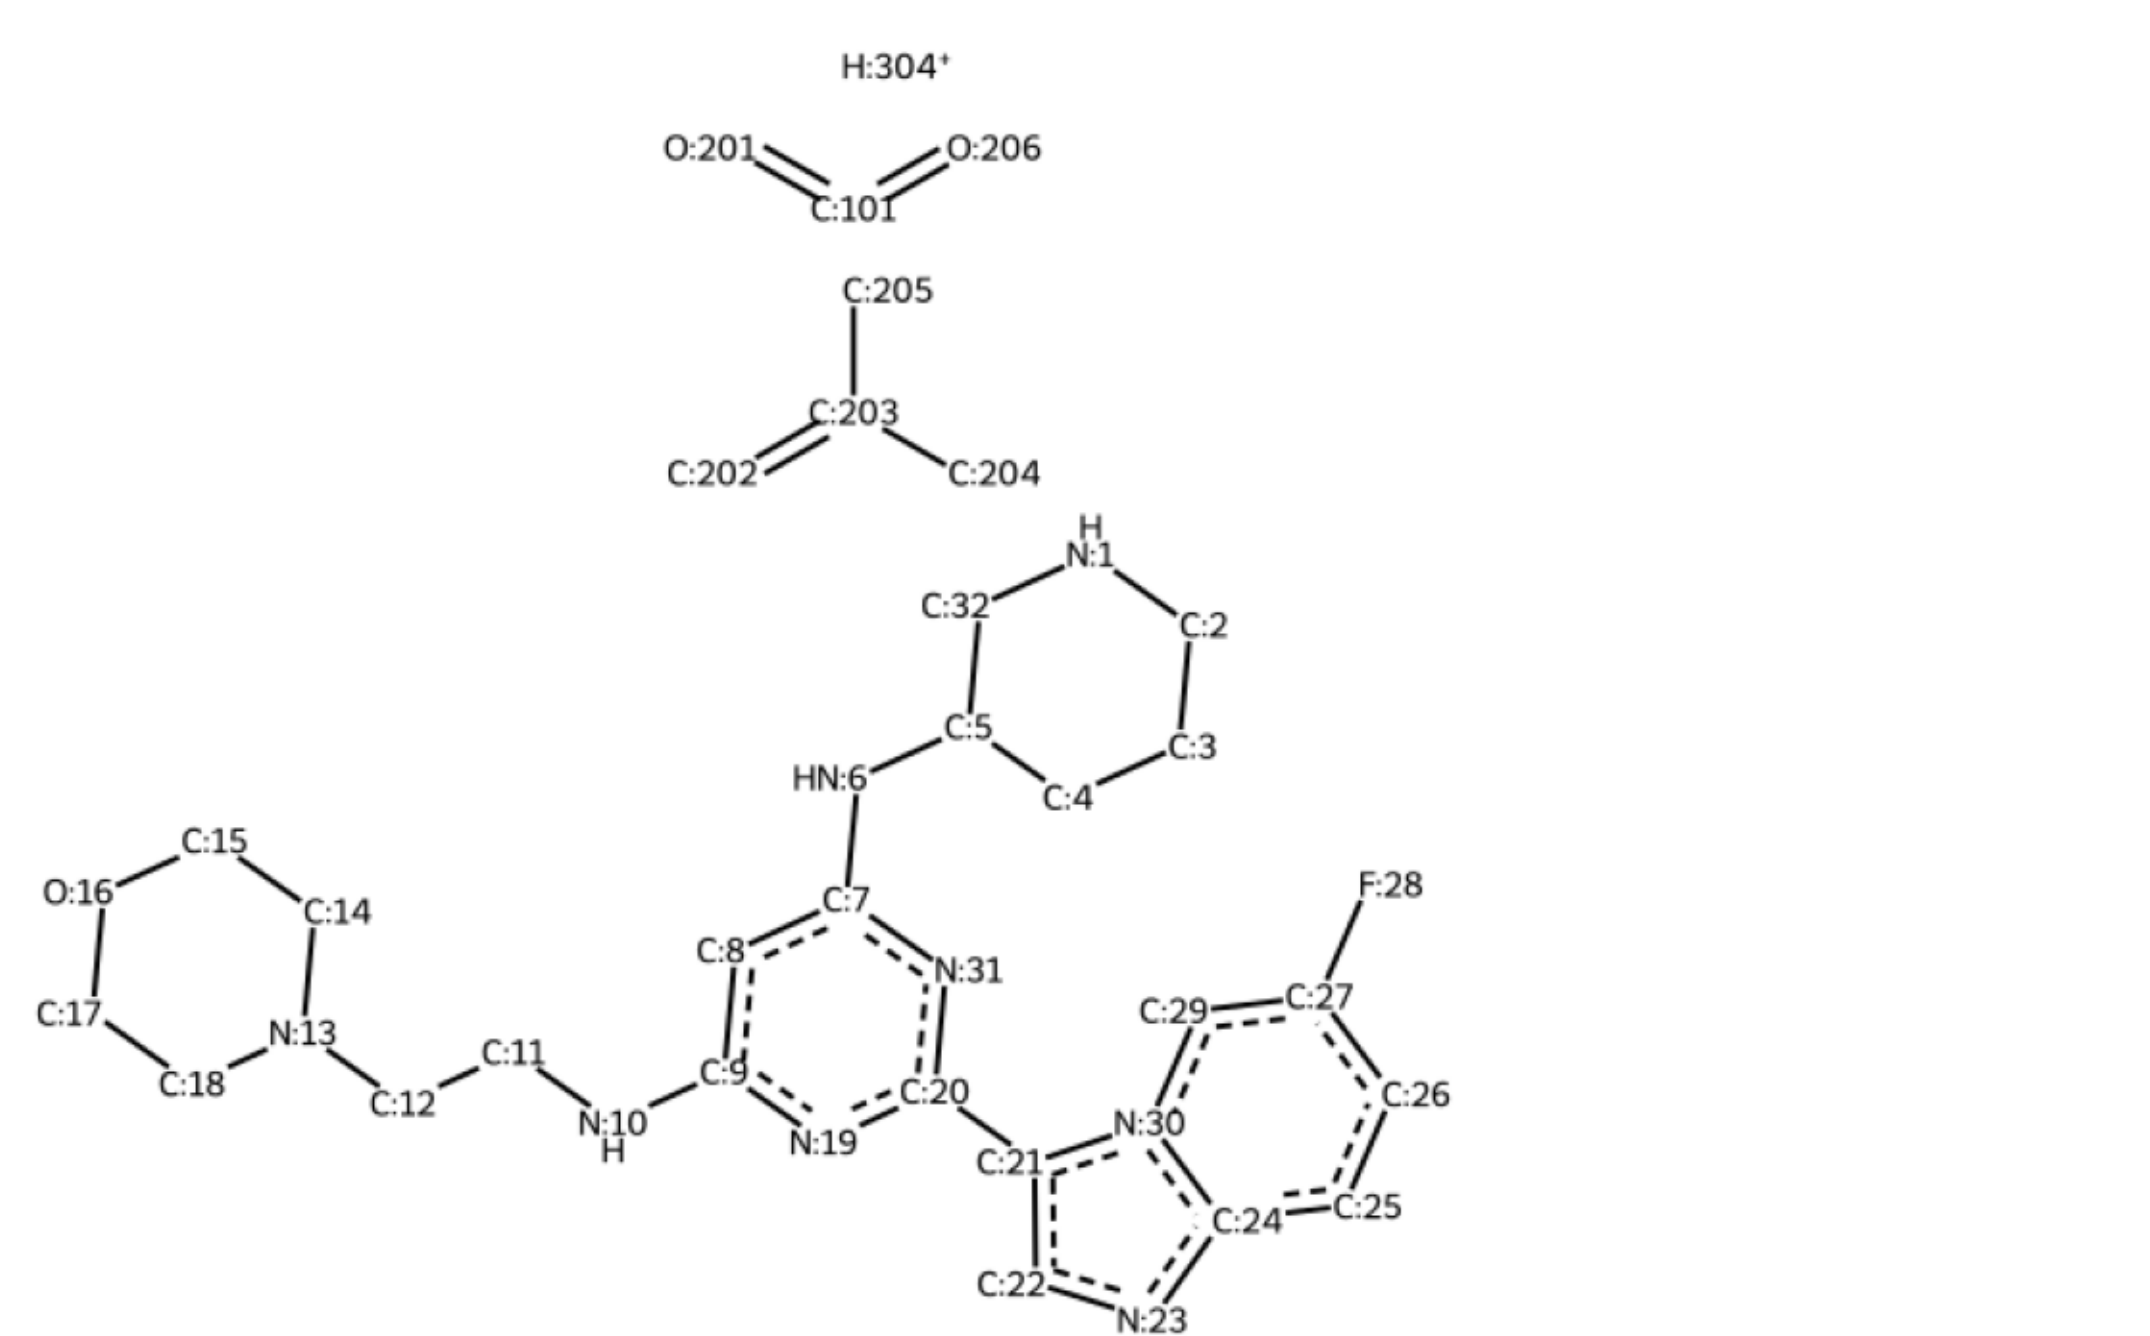



Original reaction  
sampled RXN\_ID:46)

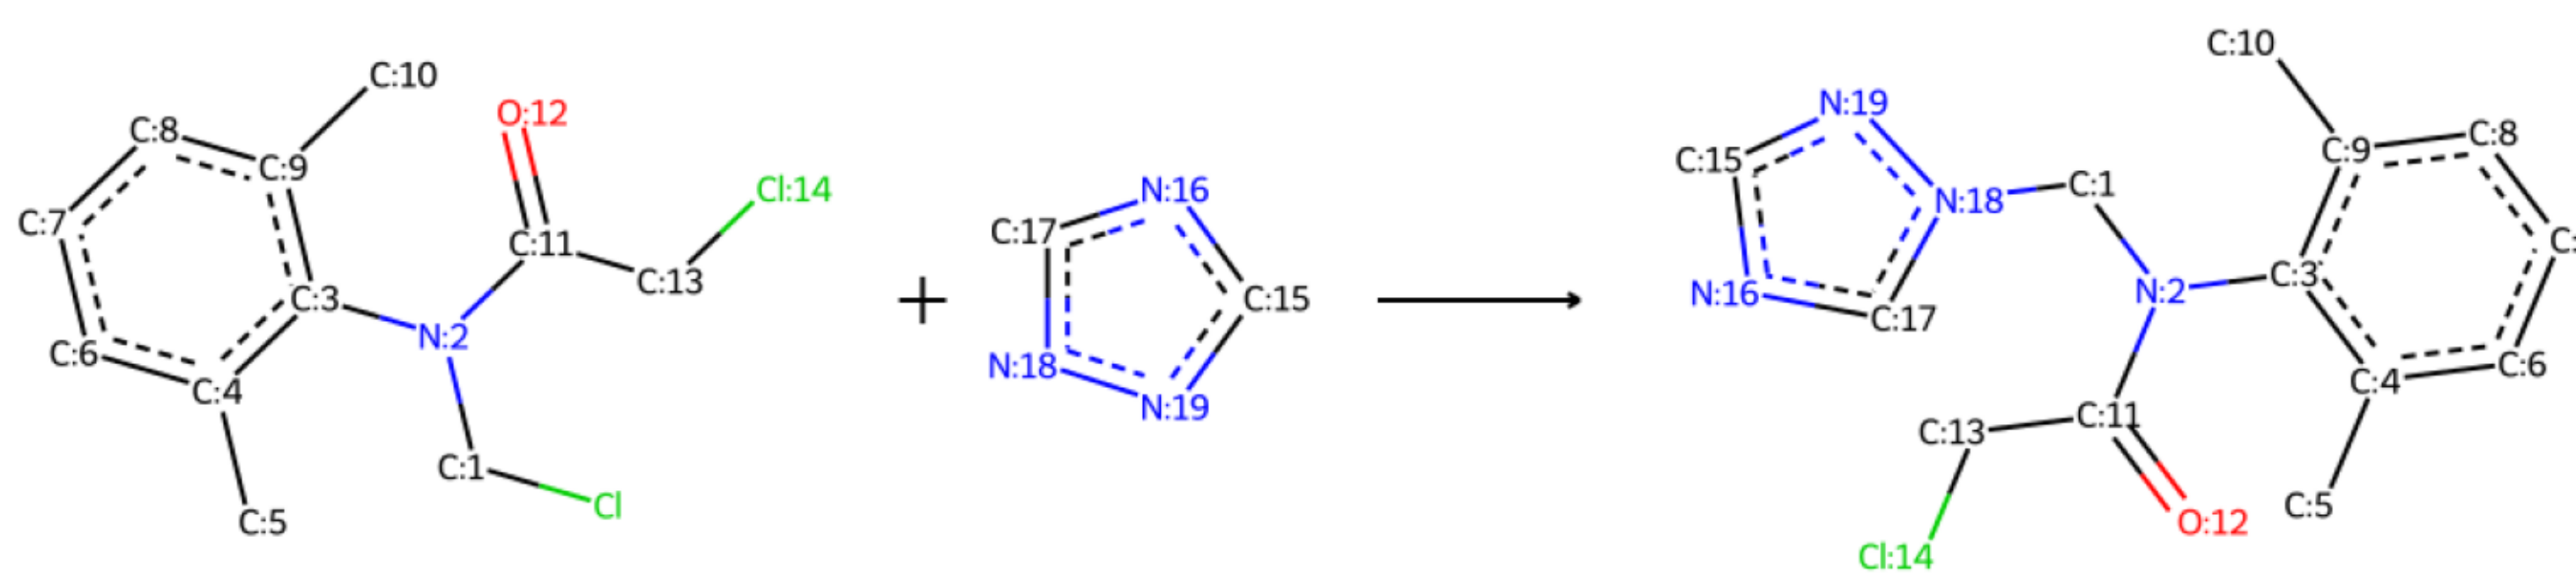

Identified mechanistic class -  
SN2 reaction

Reaction with missing reagents recovered

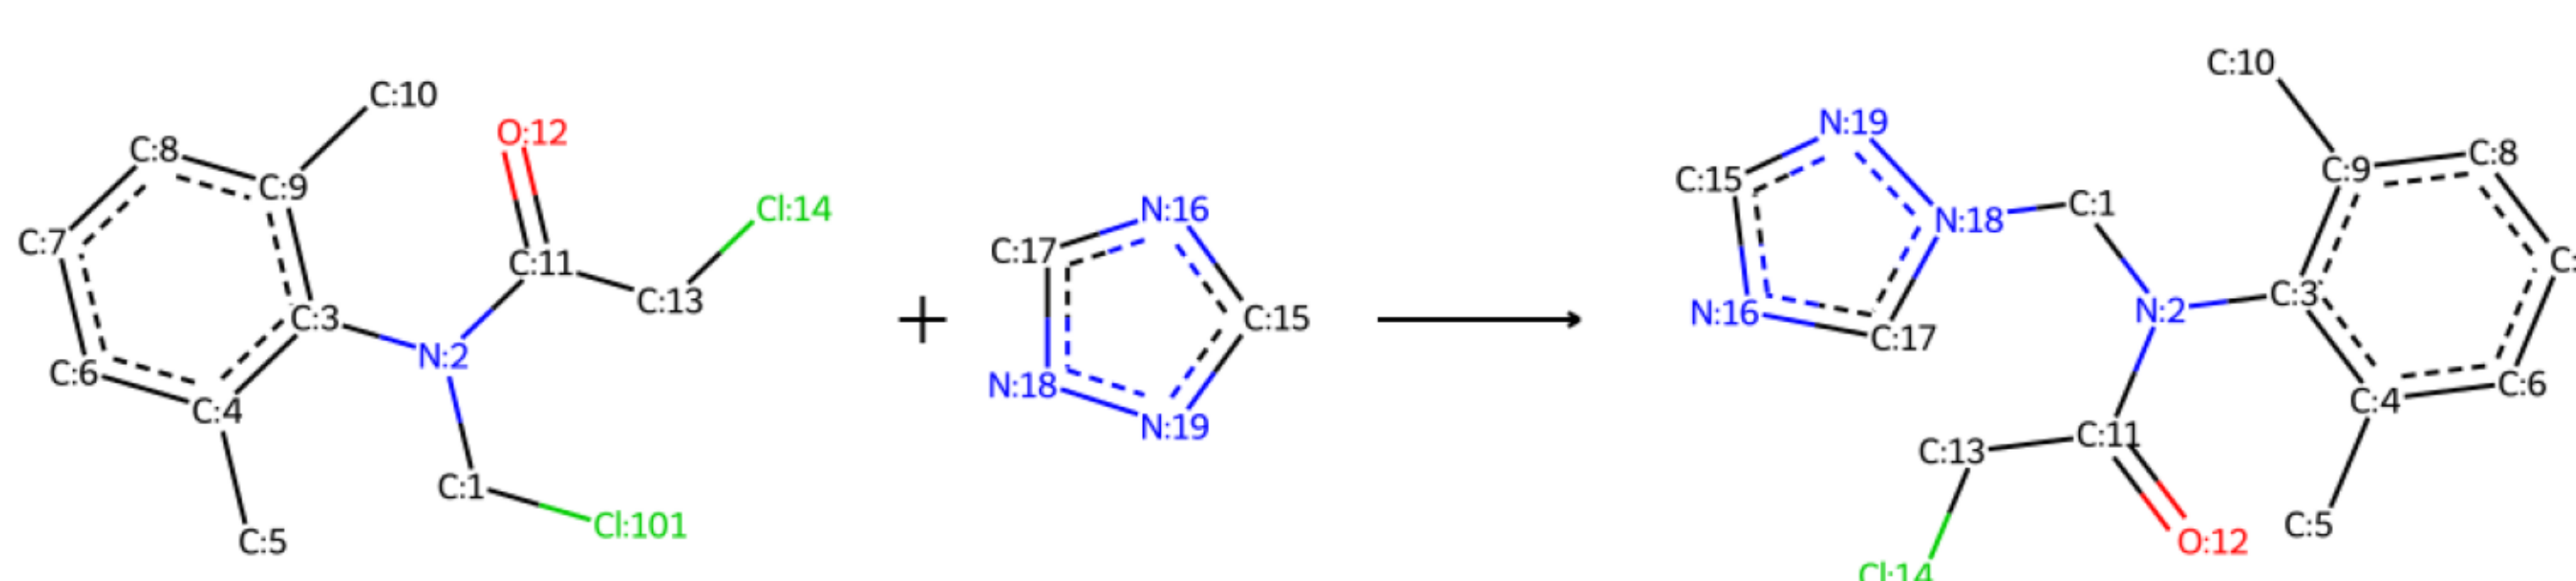

Proposed mechanistic pathway

[Arrow order: (1) green, (2) blue, (3) red, (4) orange]

step #1

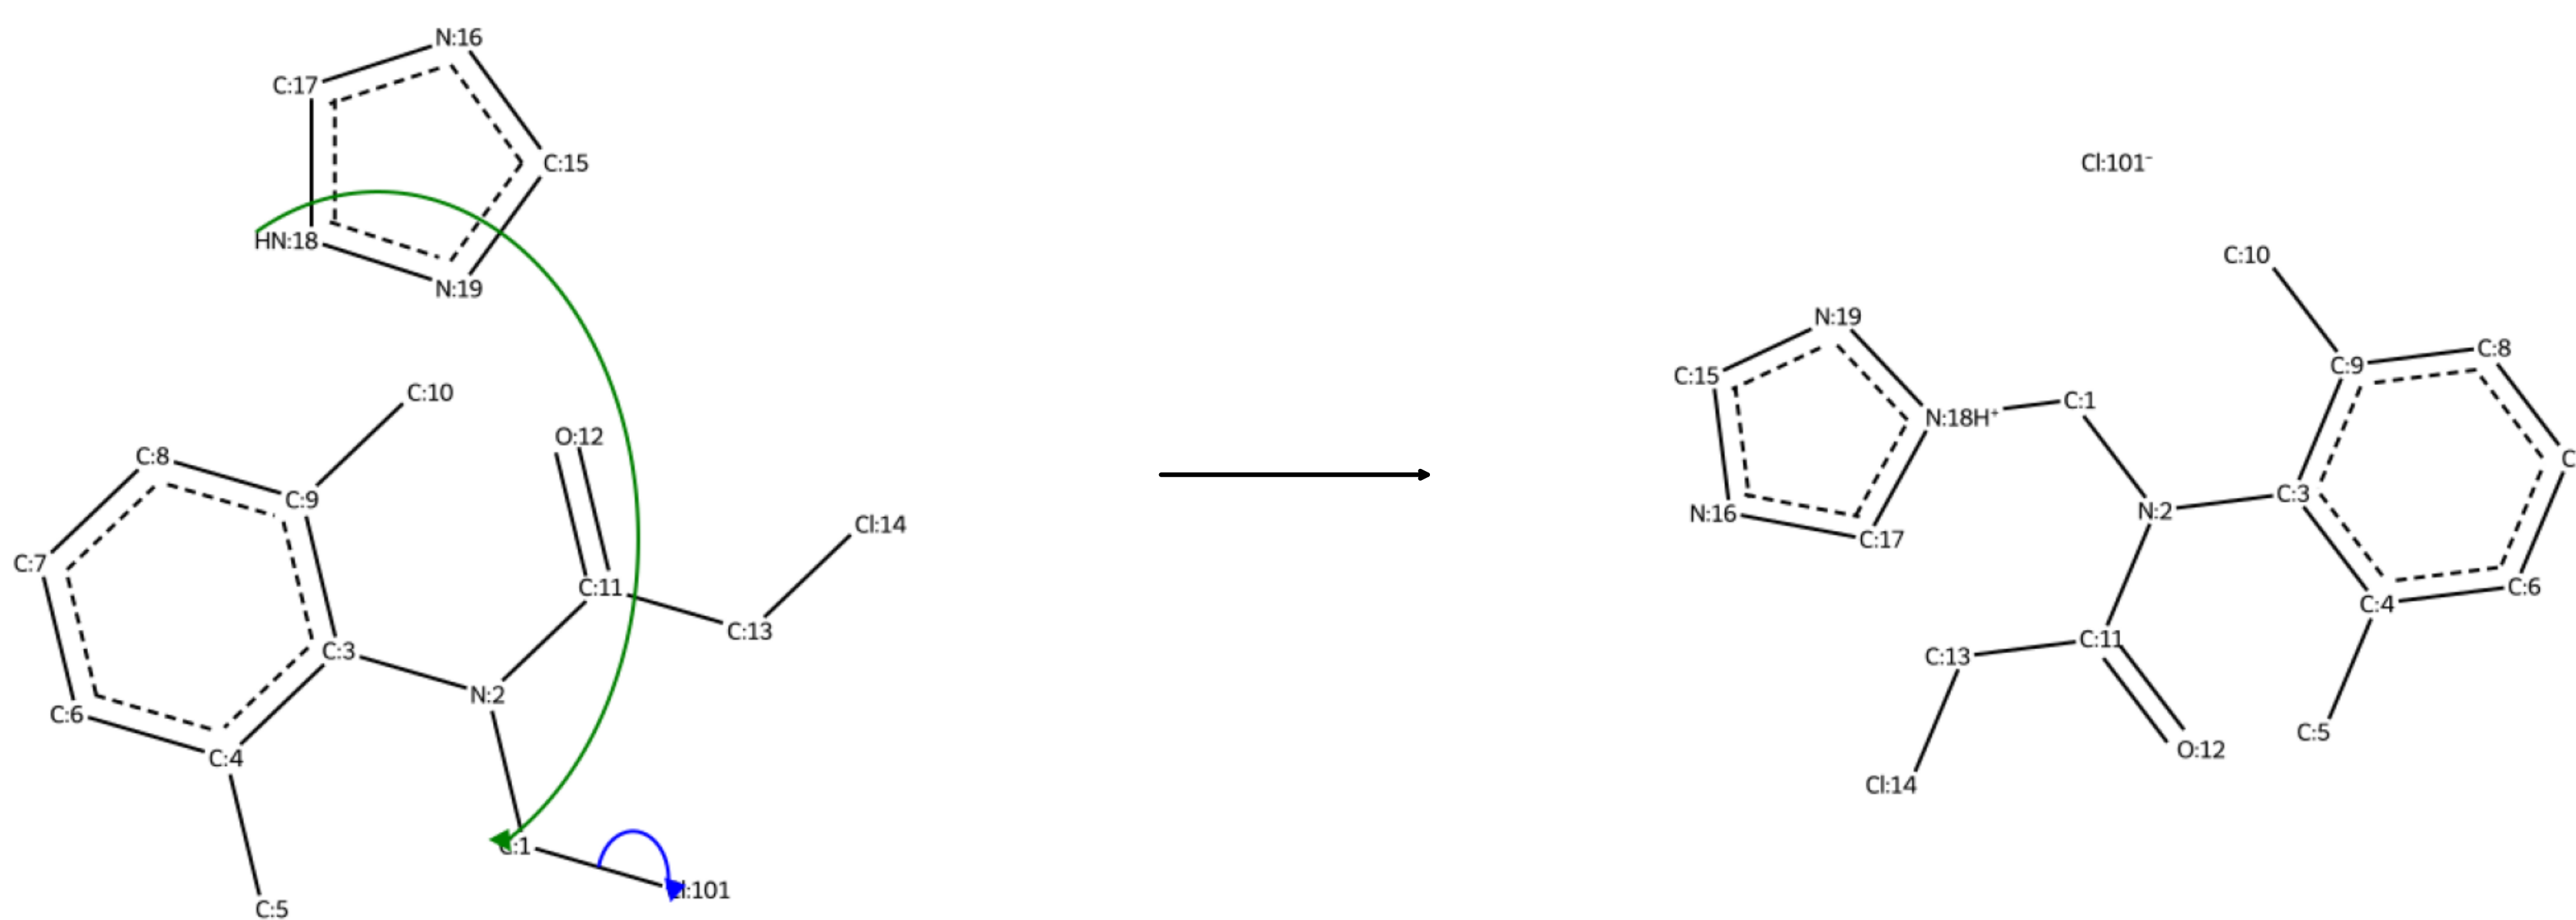

Product(s)

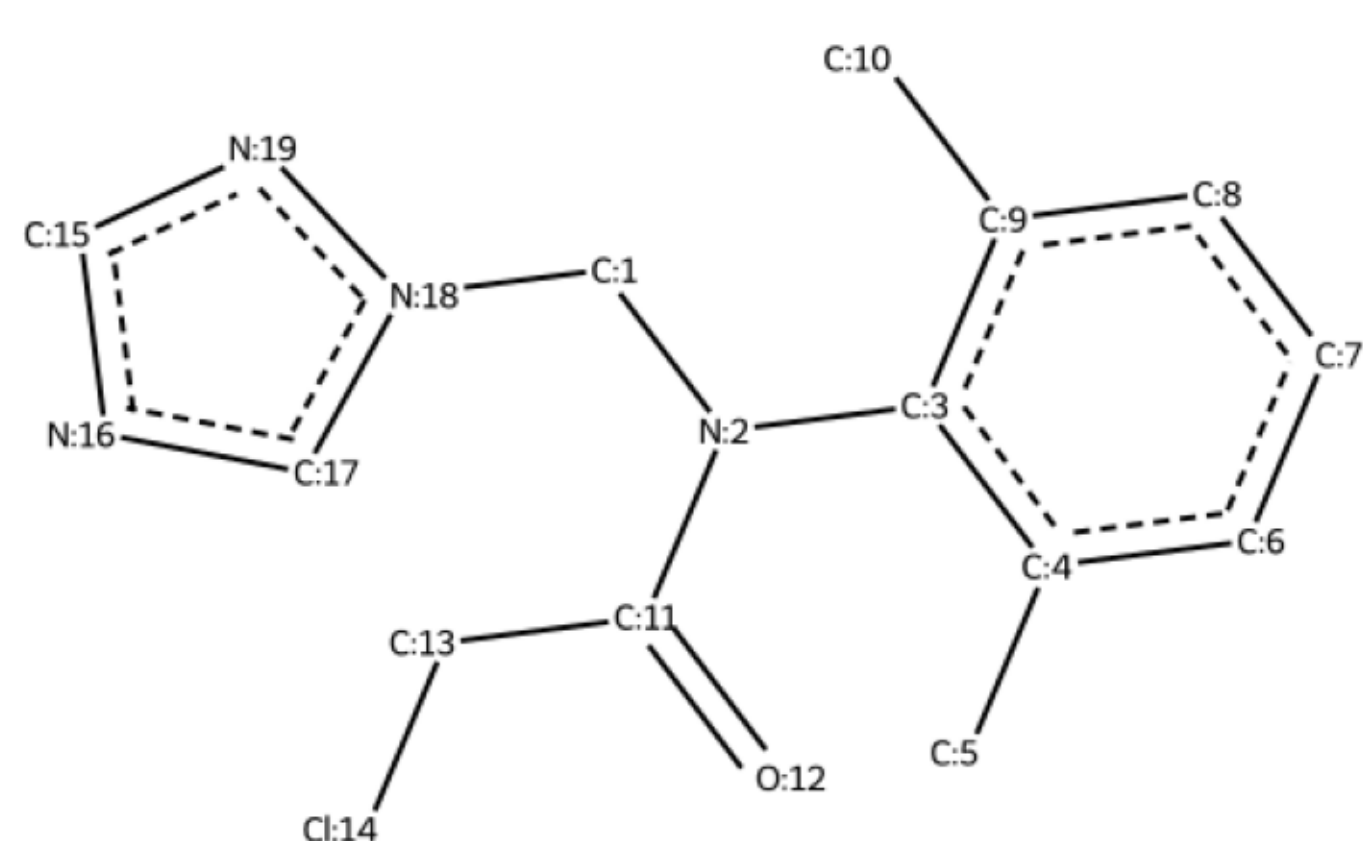

Original reaction  
sampled RXN\_ID:47)

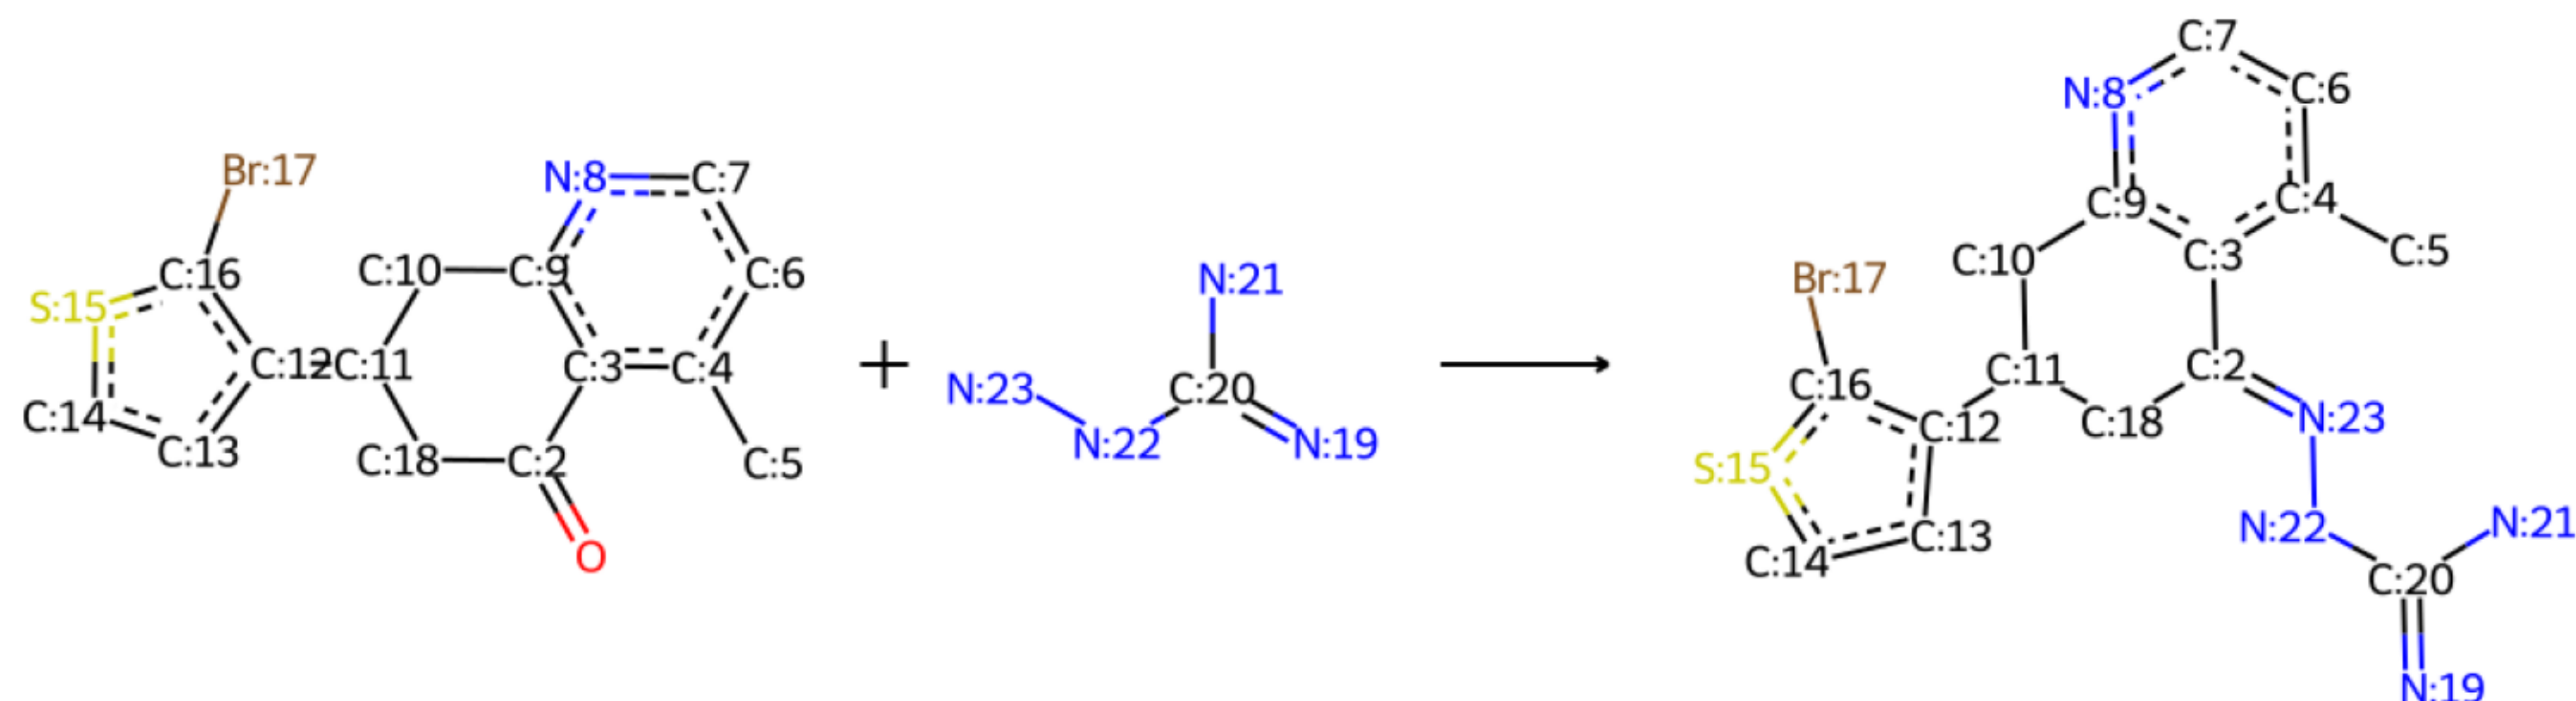

Identified mechanistic class -  
imine\_formation reaction

Reaction with missing reagents recovered

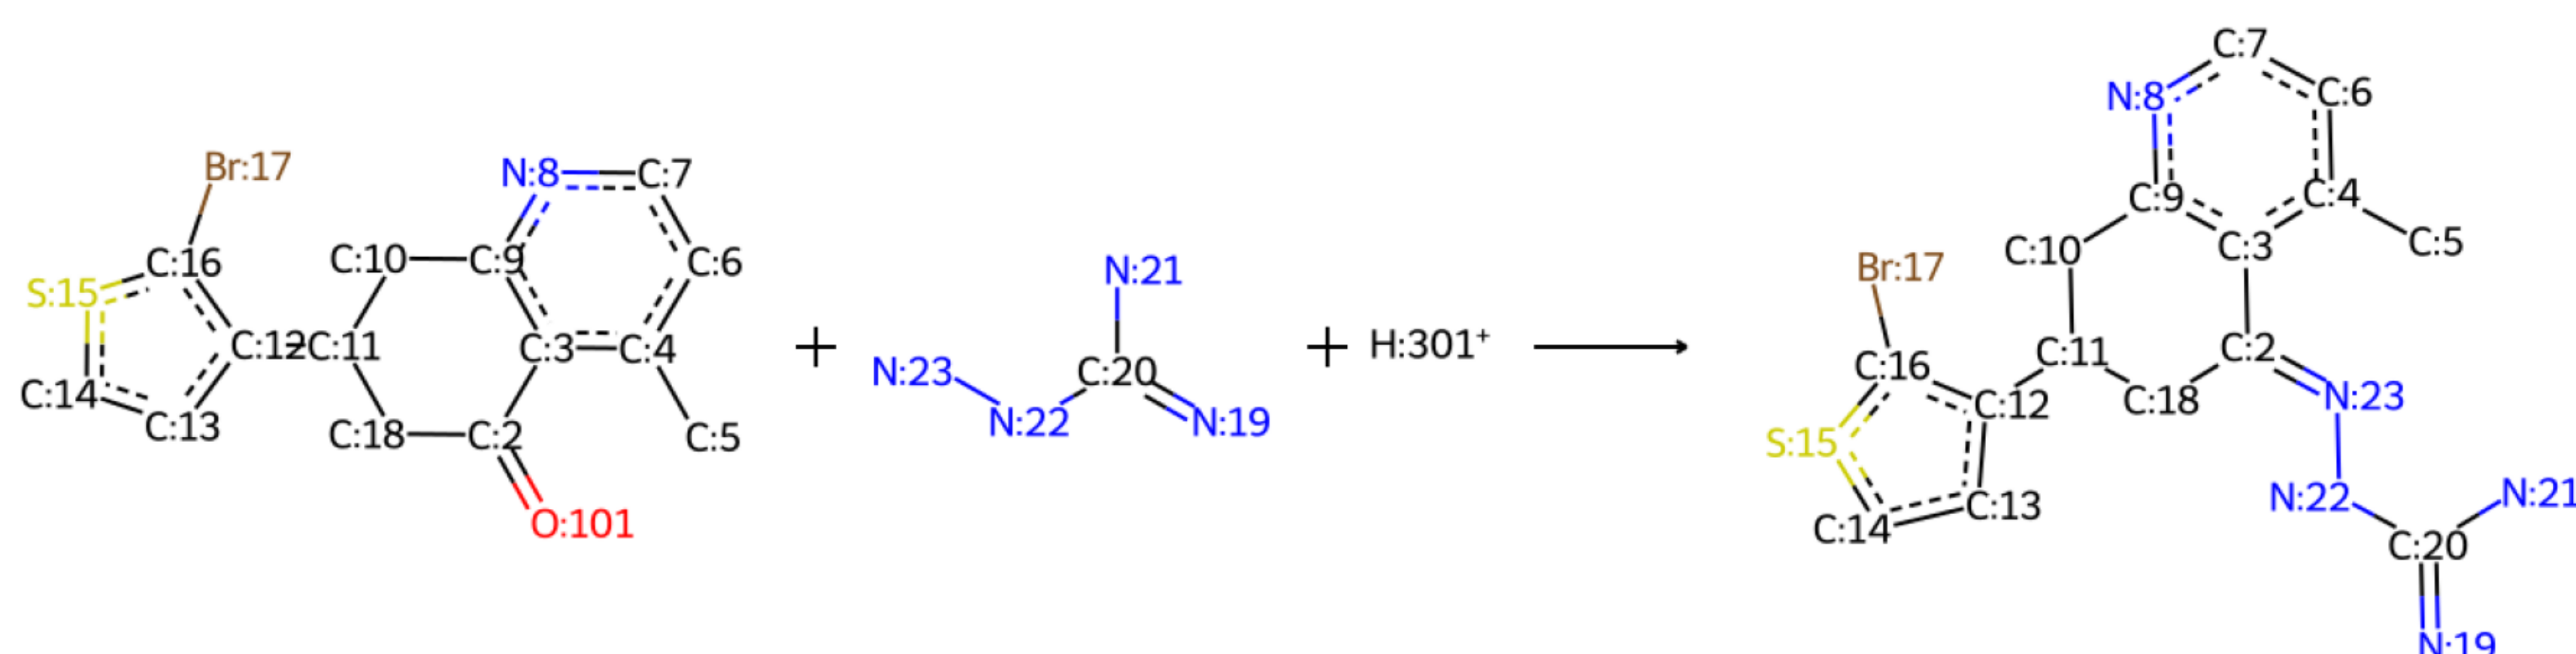

Proposed mechanistic pathway

[Arrow order: (1) green, (2) blue, (3) red, (4) orange]

step #1

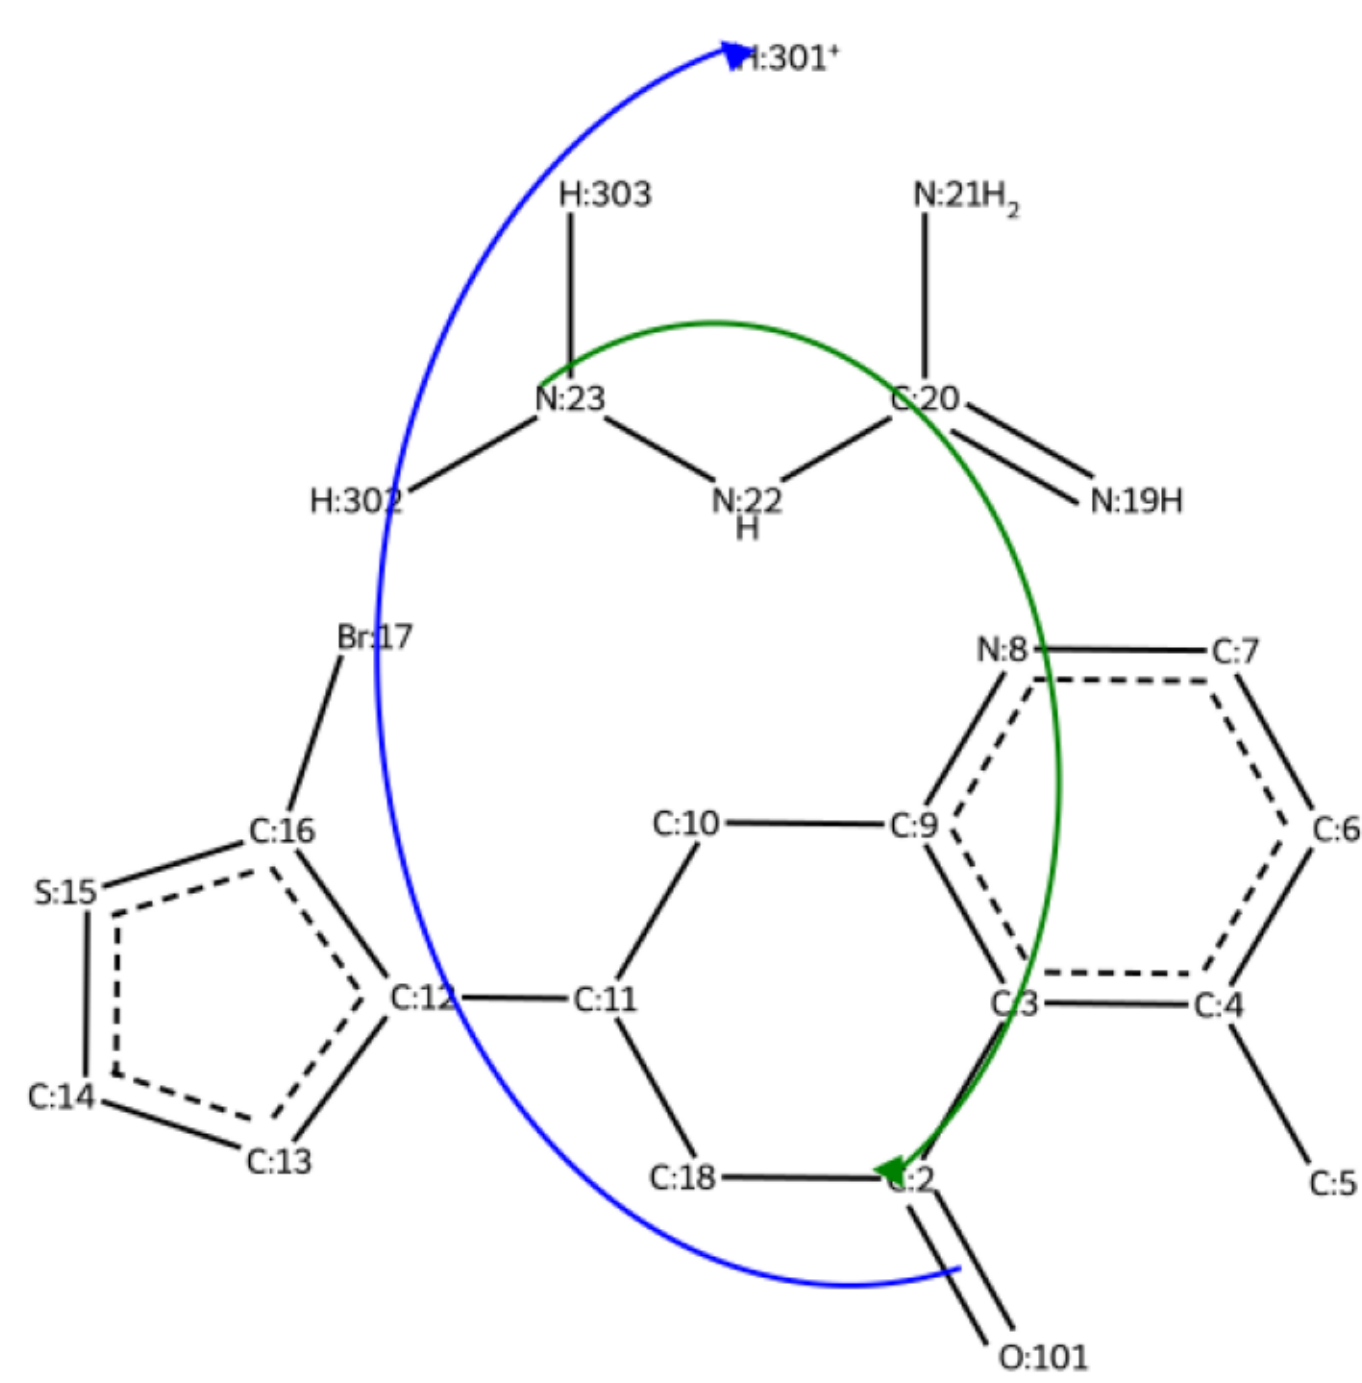

step #2

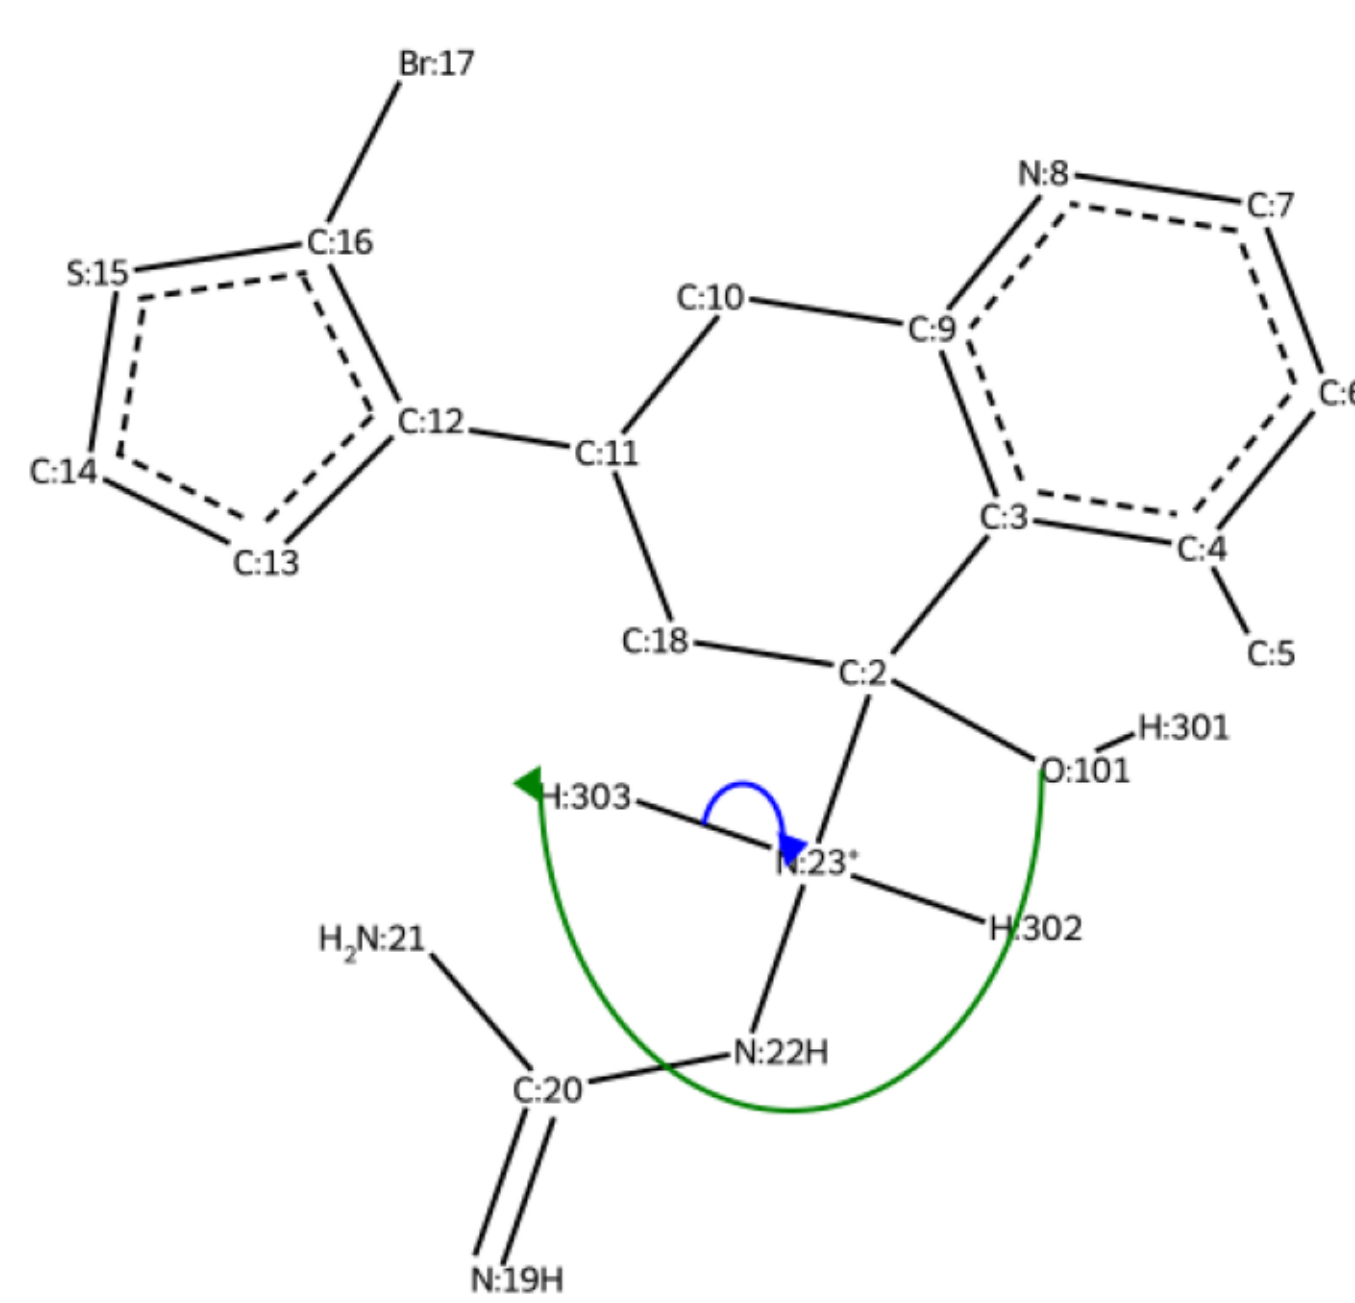

step #3

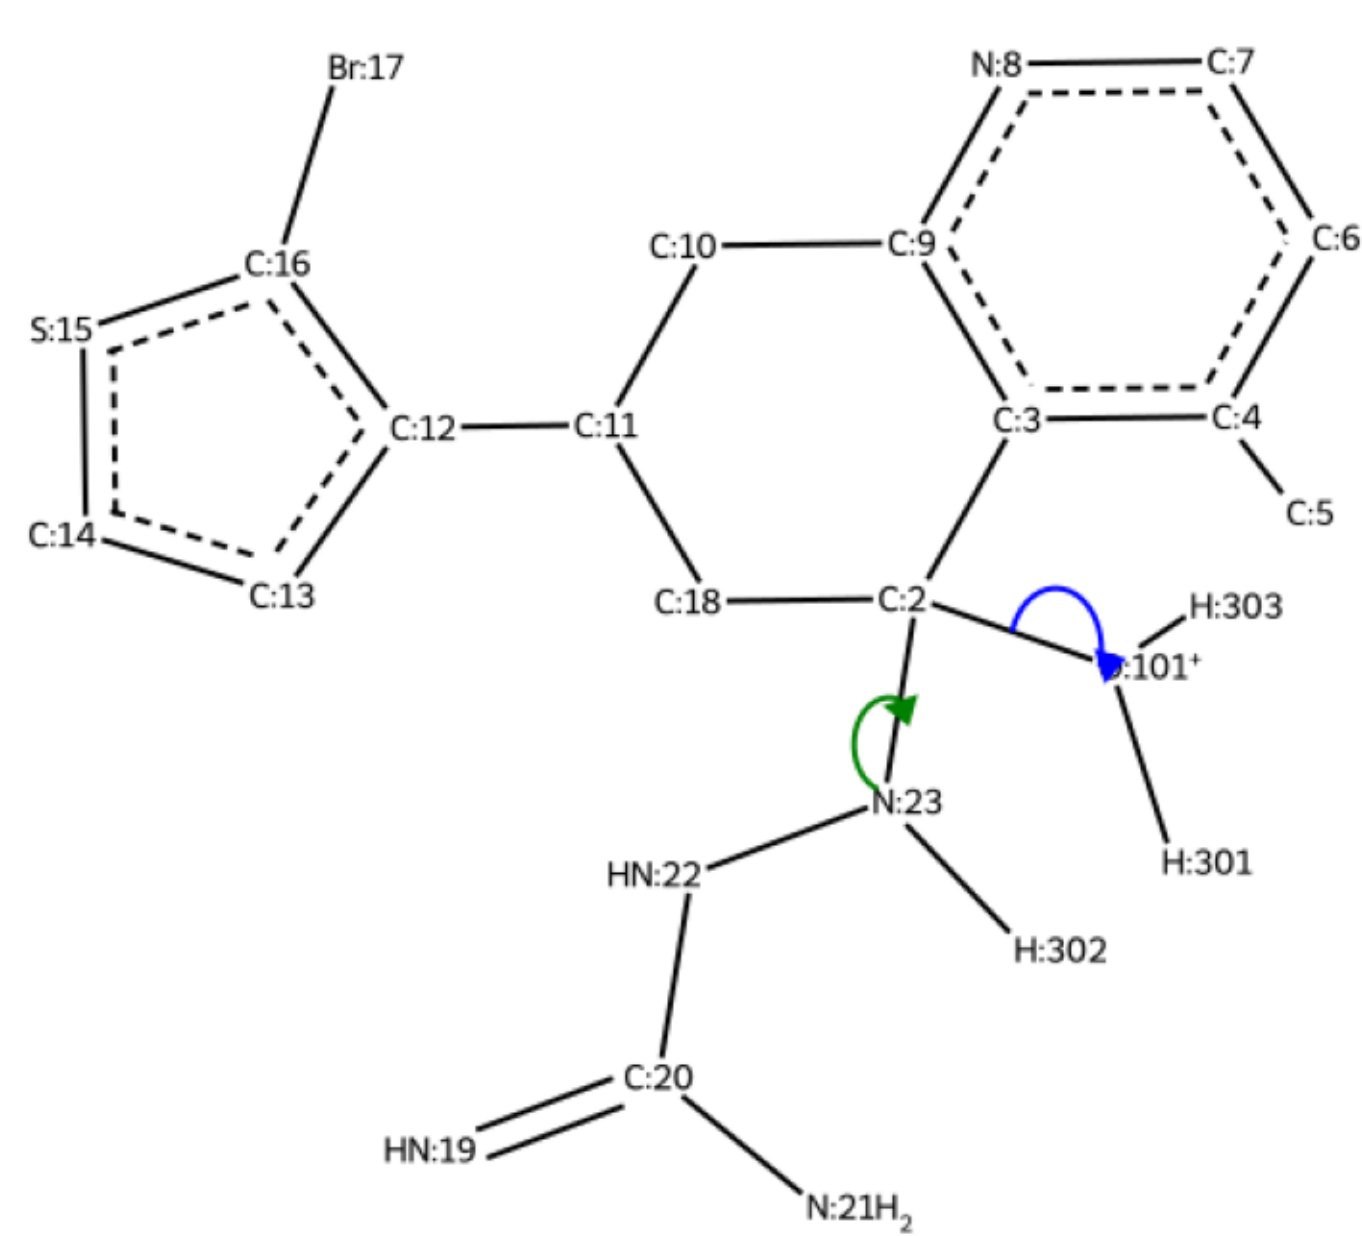

step #4

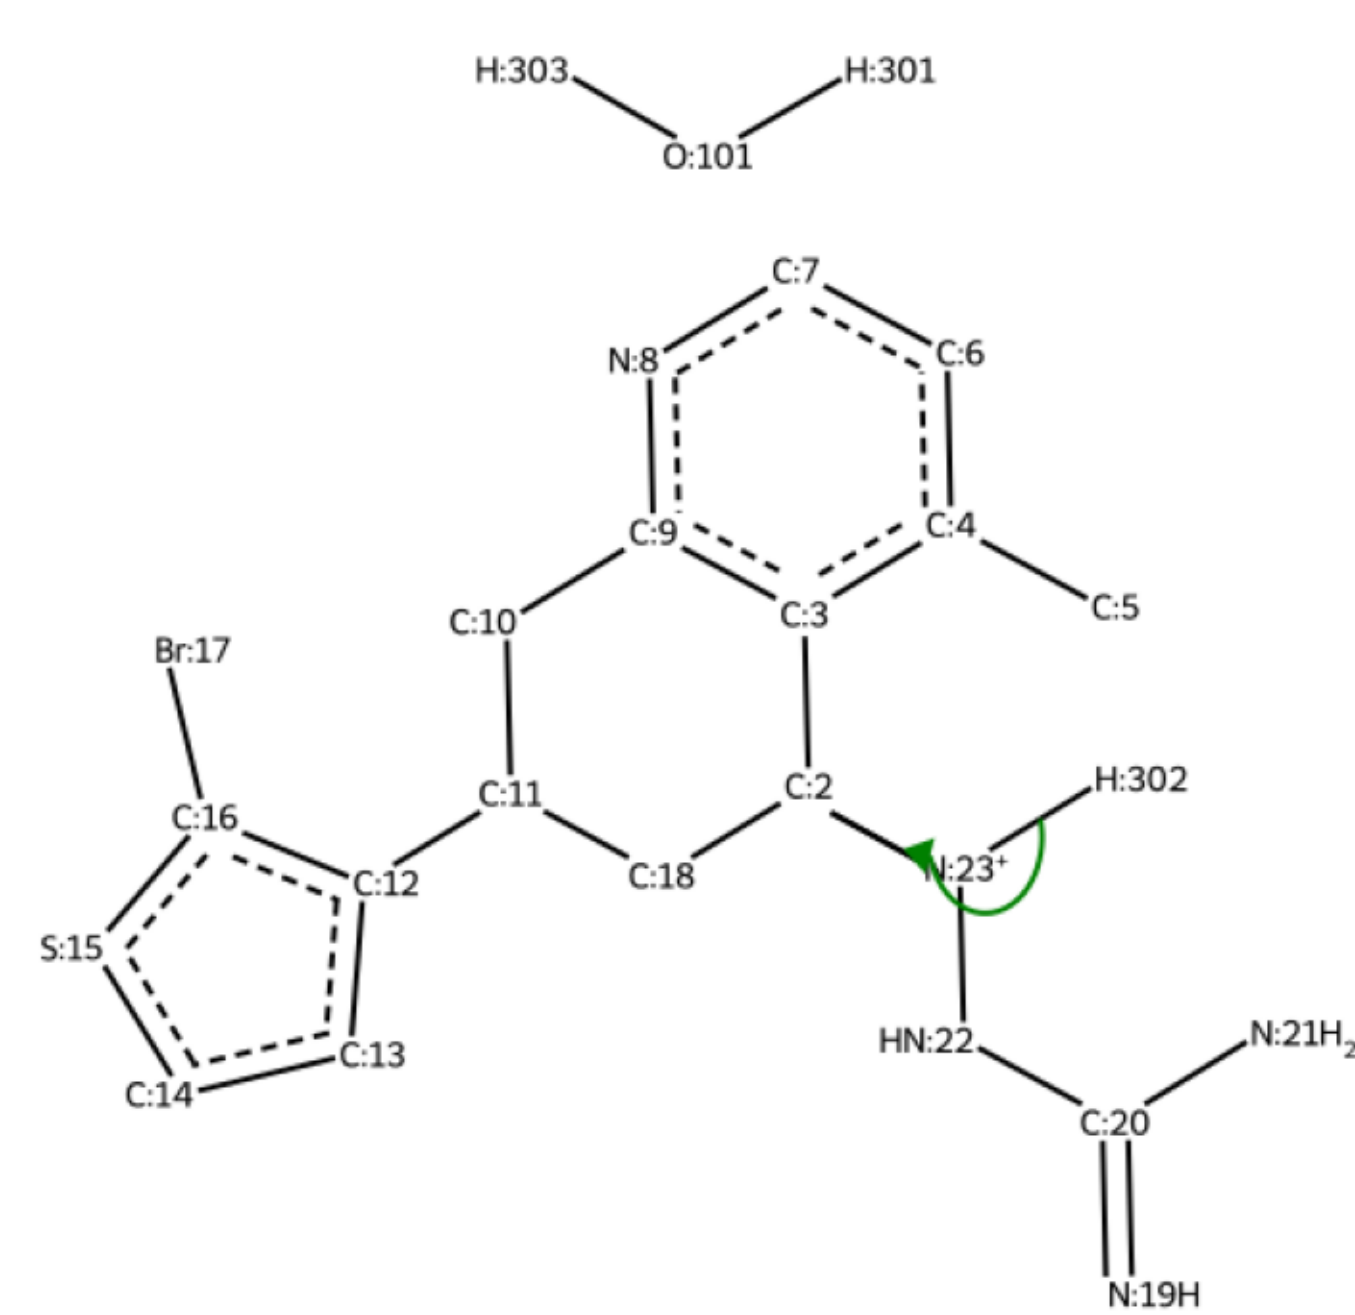

Product(s)

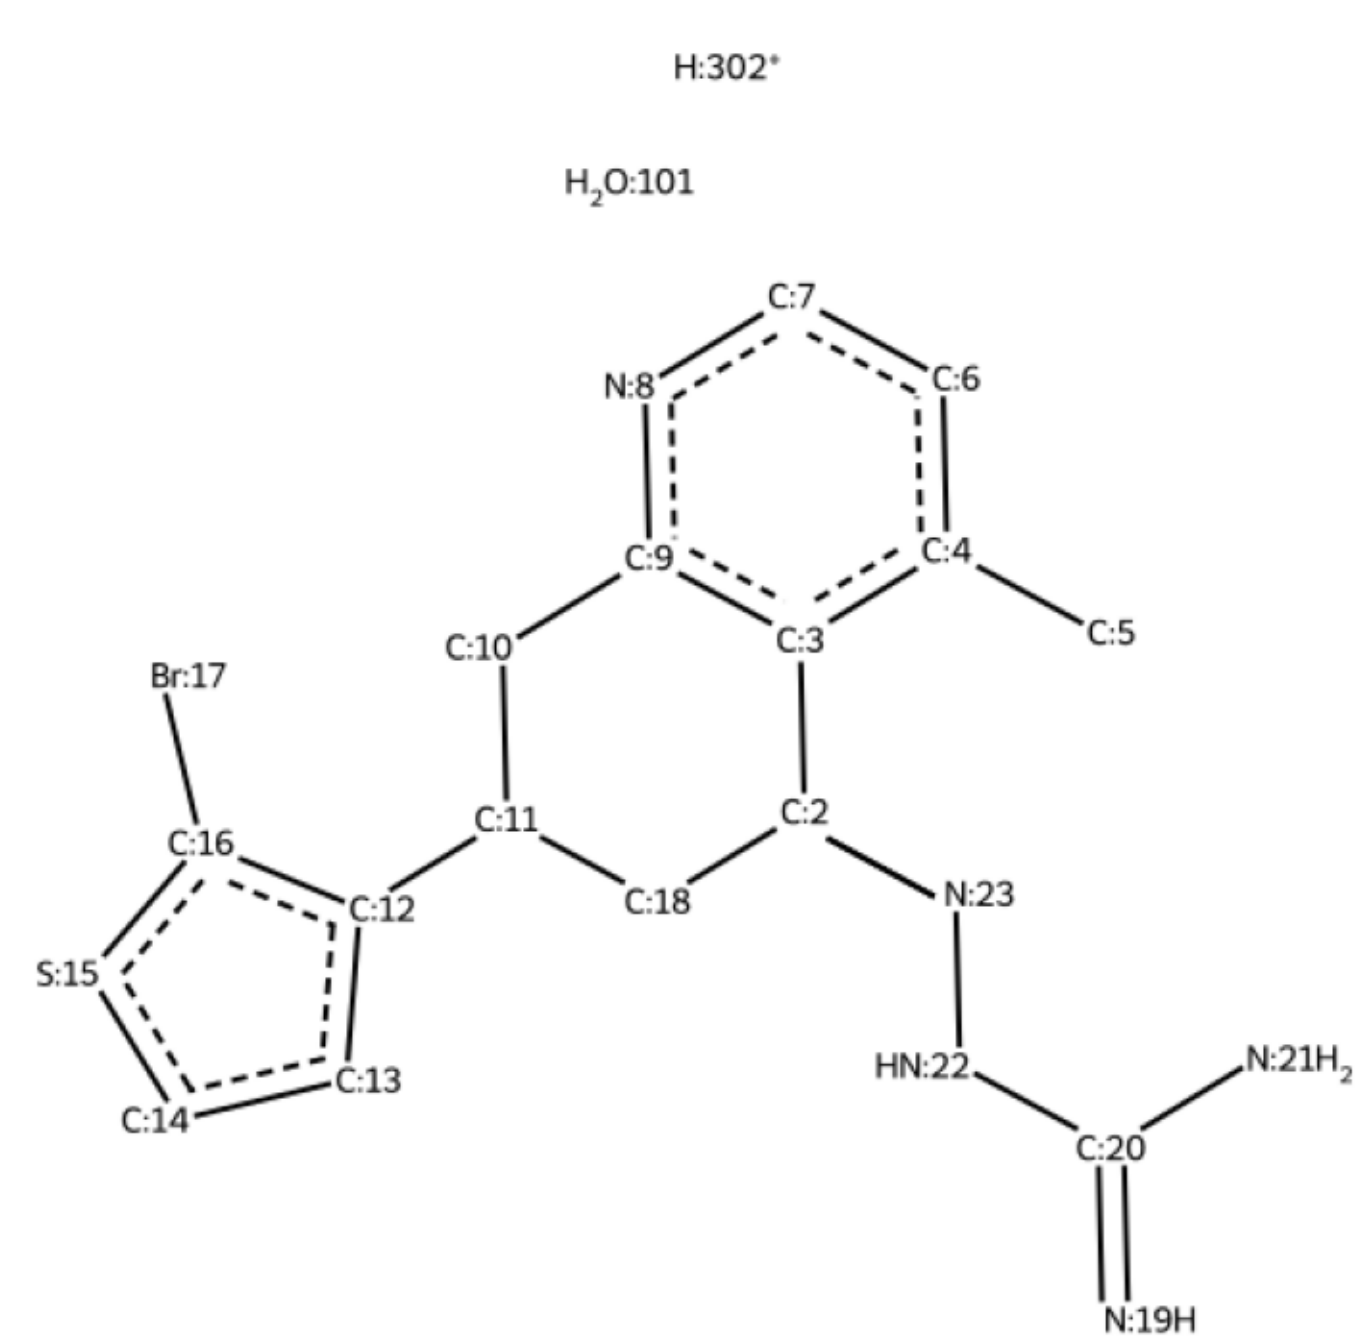



Original reaction  
sampled RXN\_ID:48)

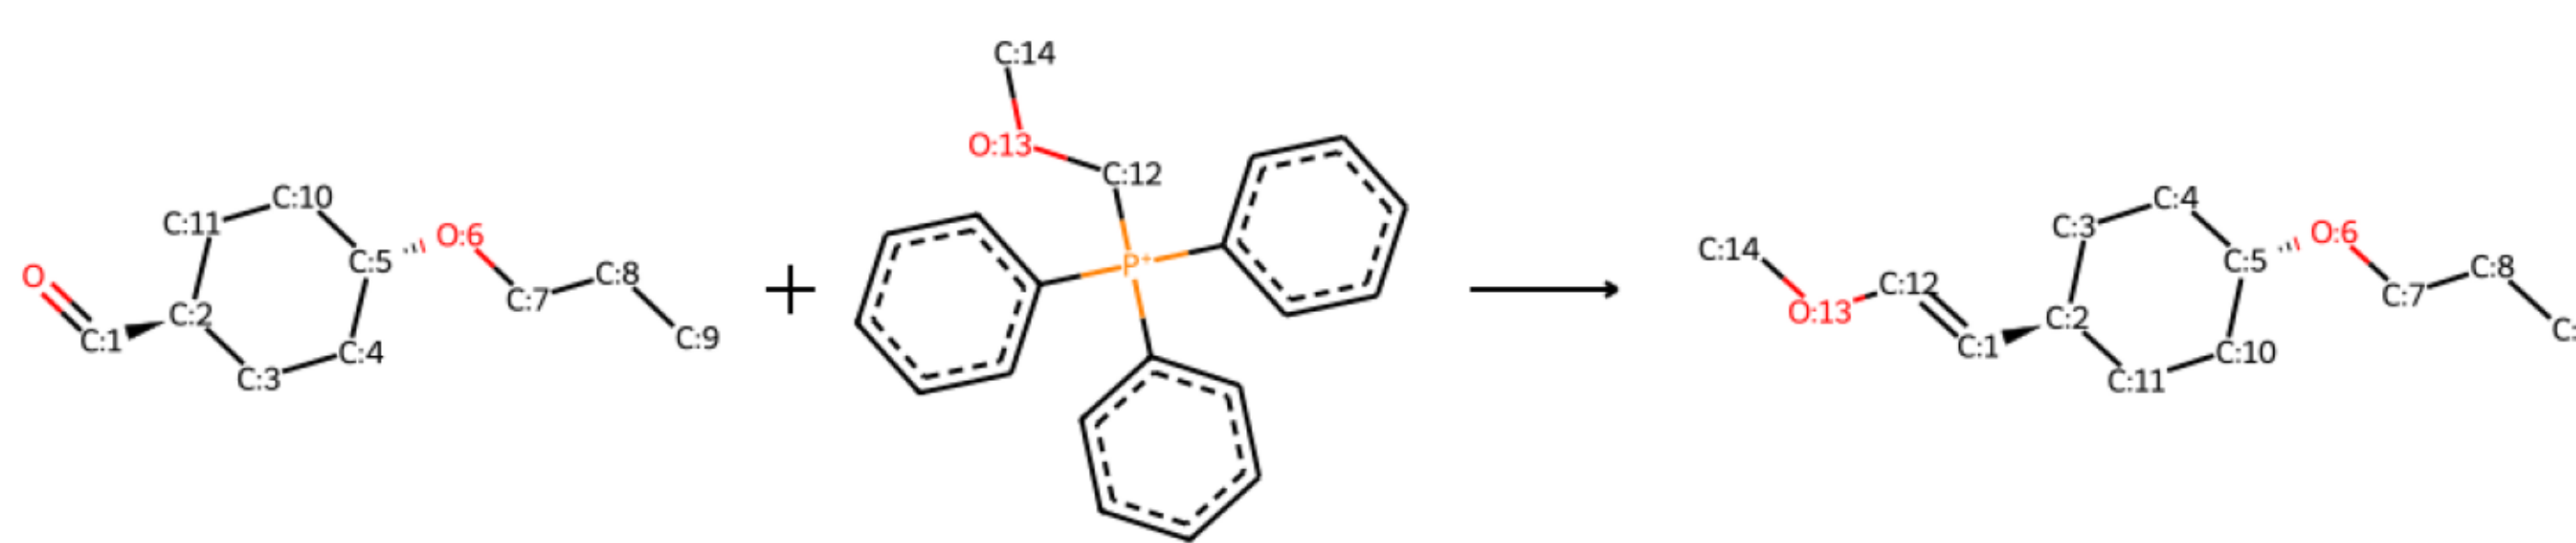

Identified mechanistic class -  
Wittig reaction

Reaction with missing reagents recovered

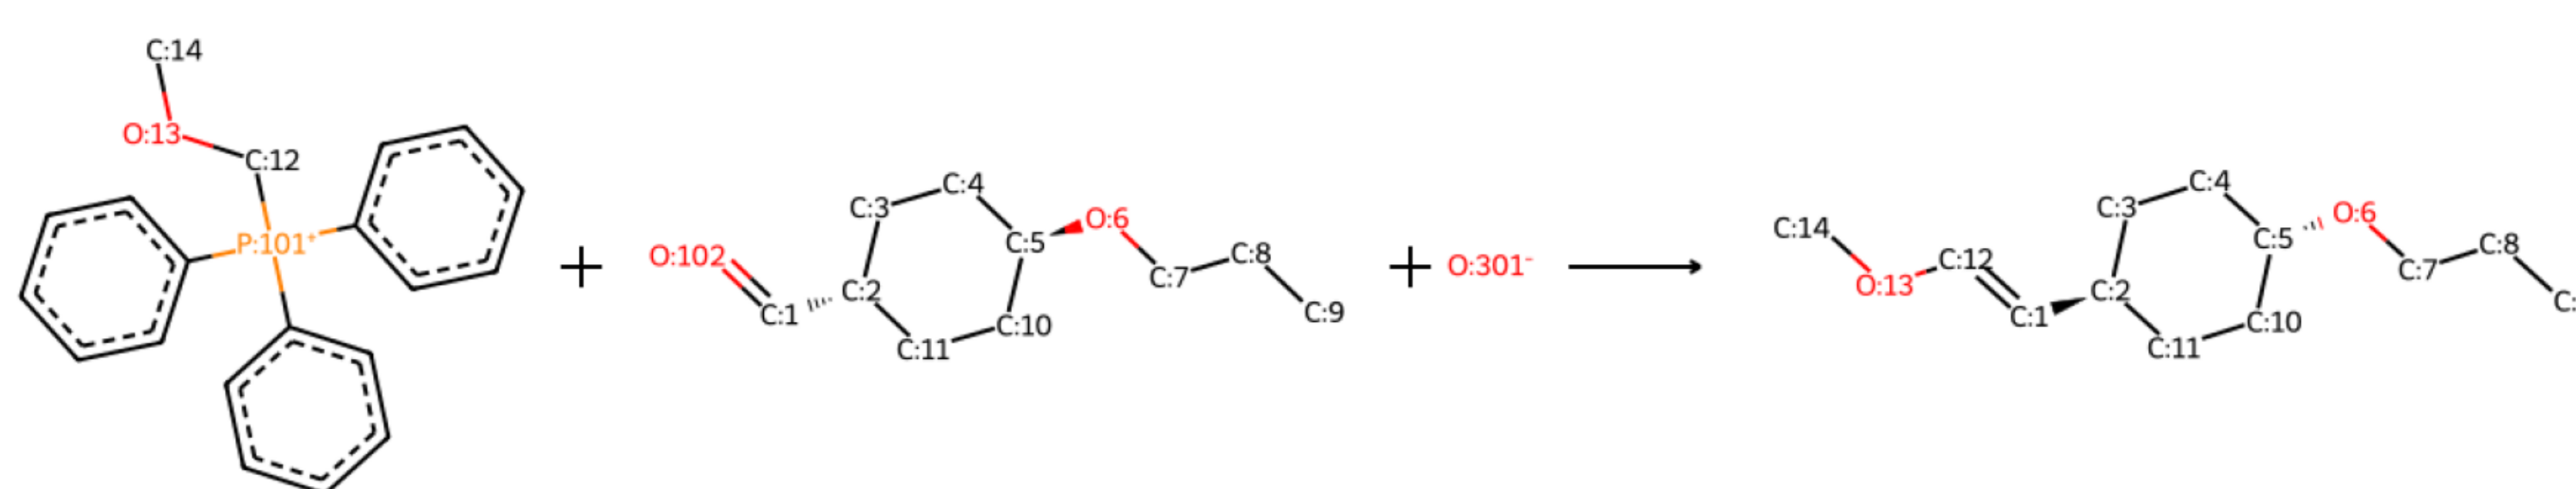

Proposed mechanistic pathway

[Arrow order: (1) green, (2) blue, (3) red, (4) orange]

step #1

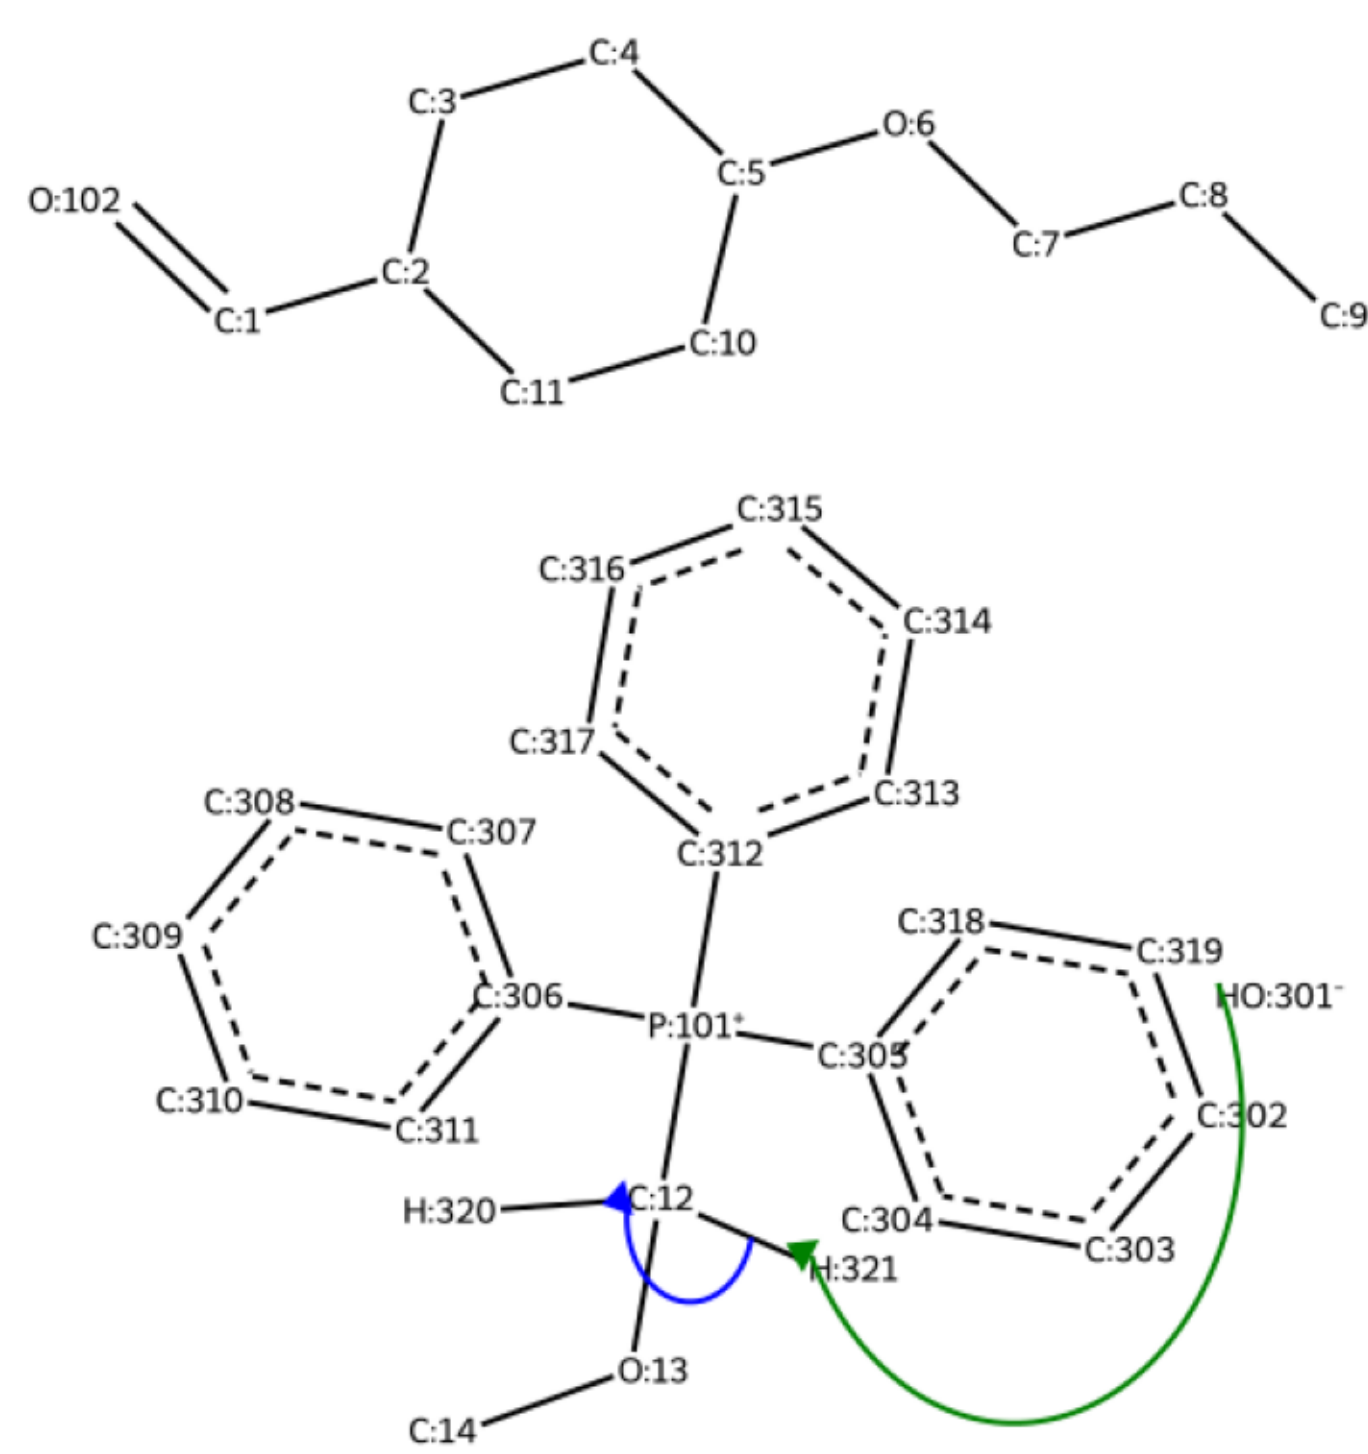

step #2

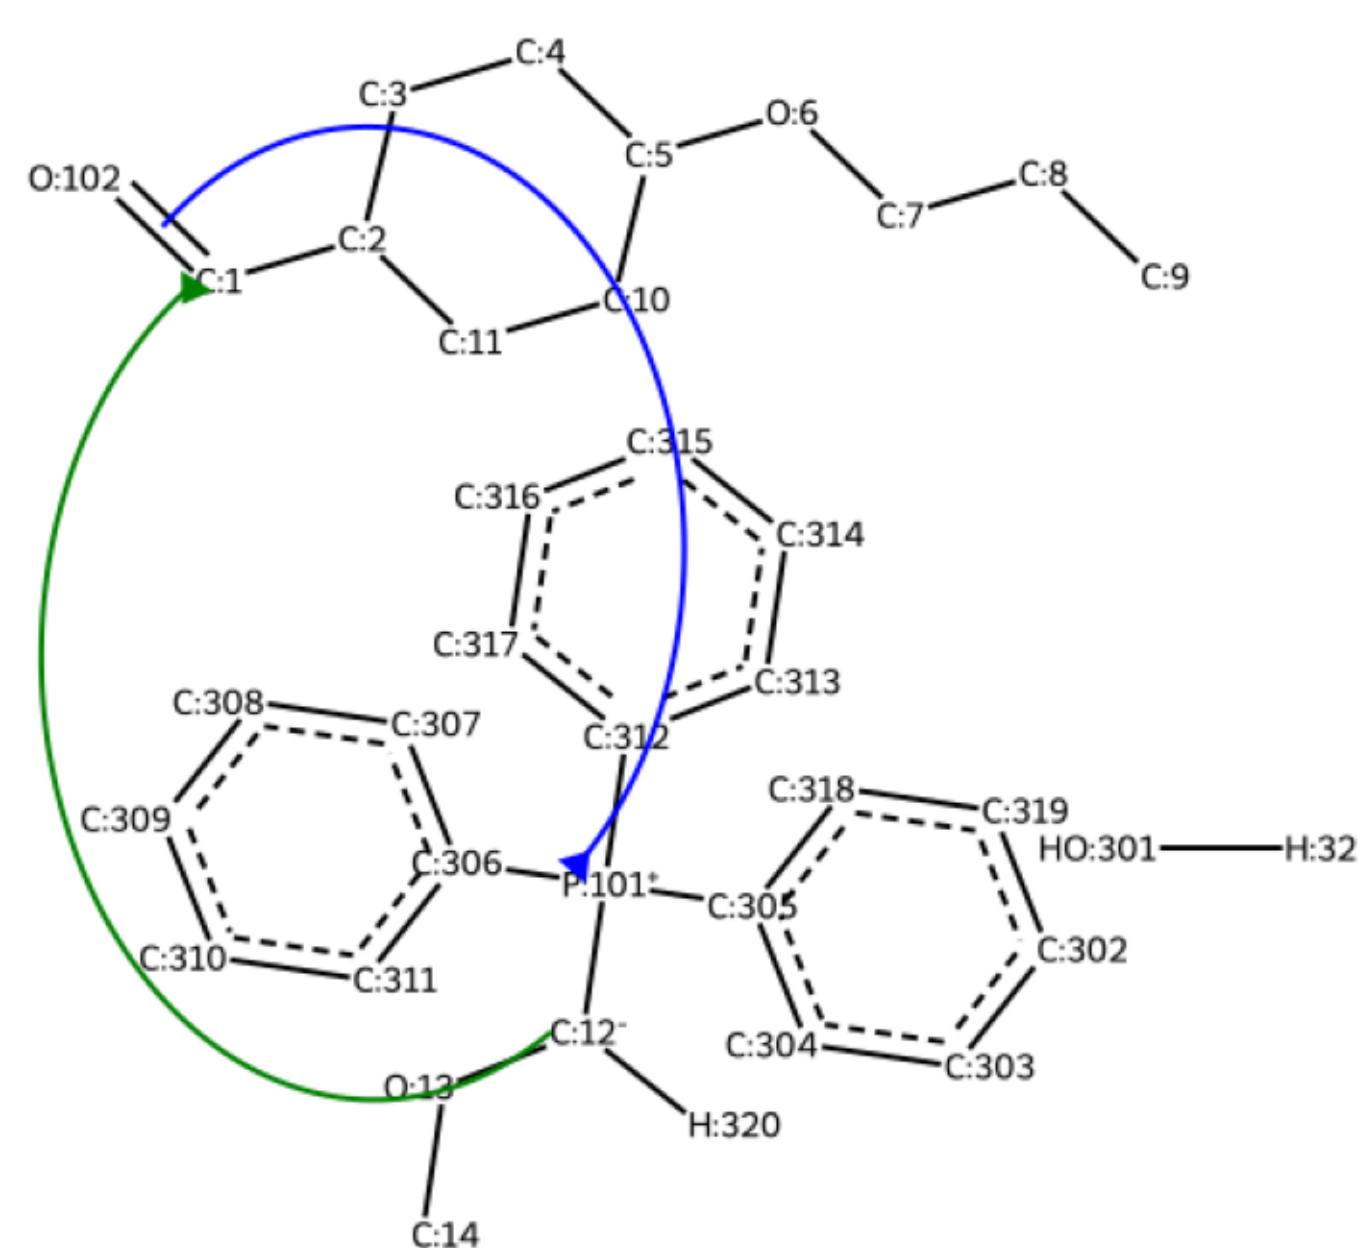

step #3

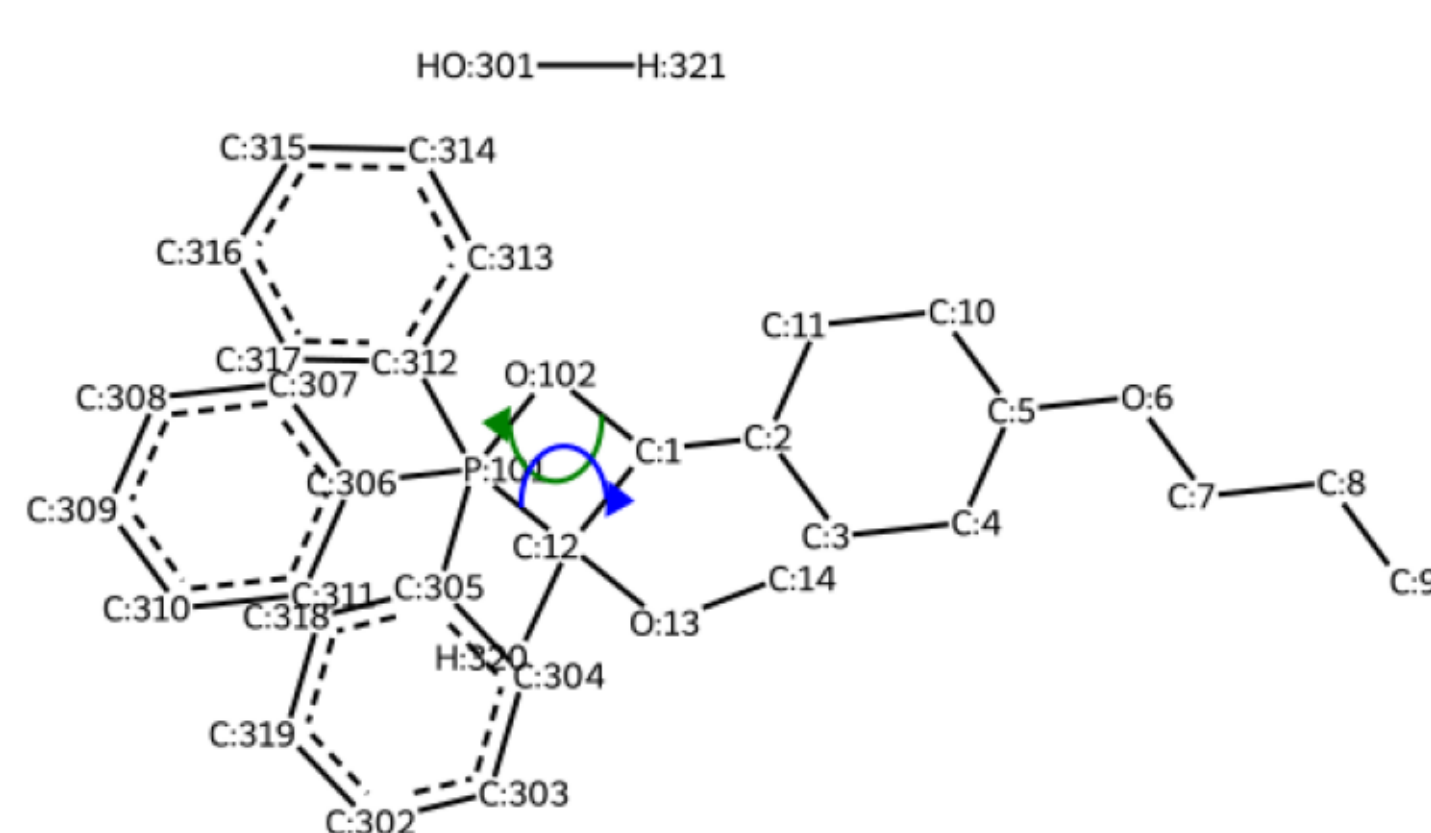

Product(s)

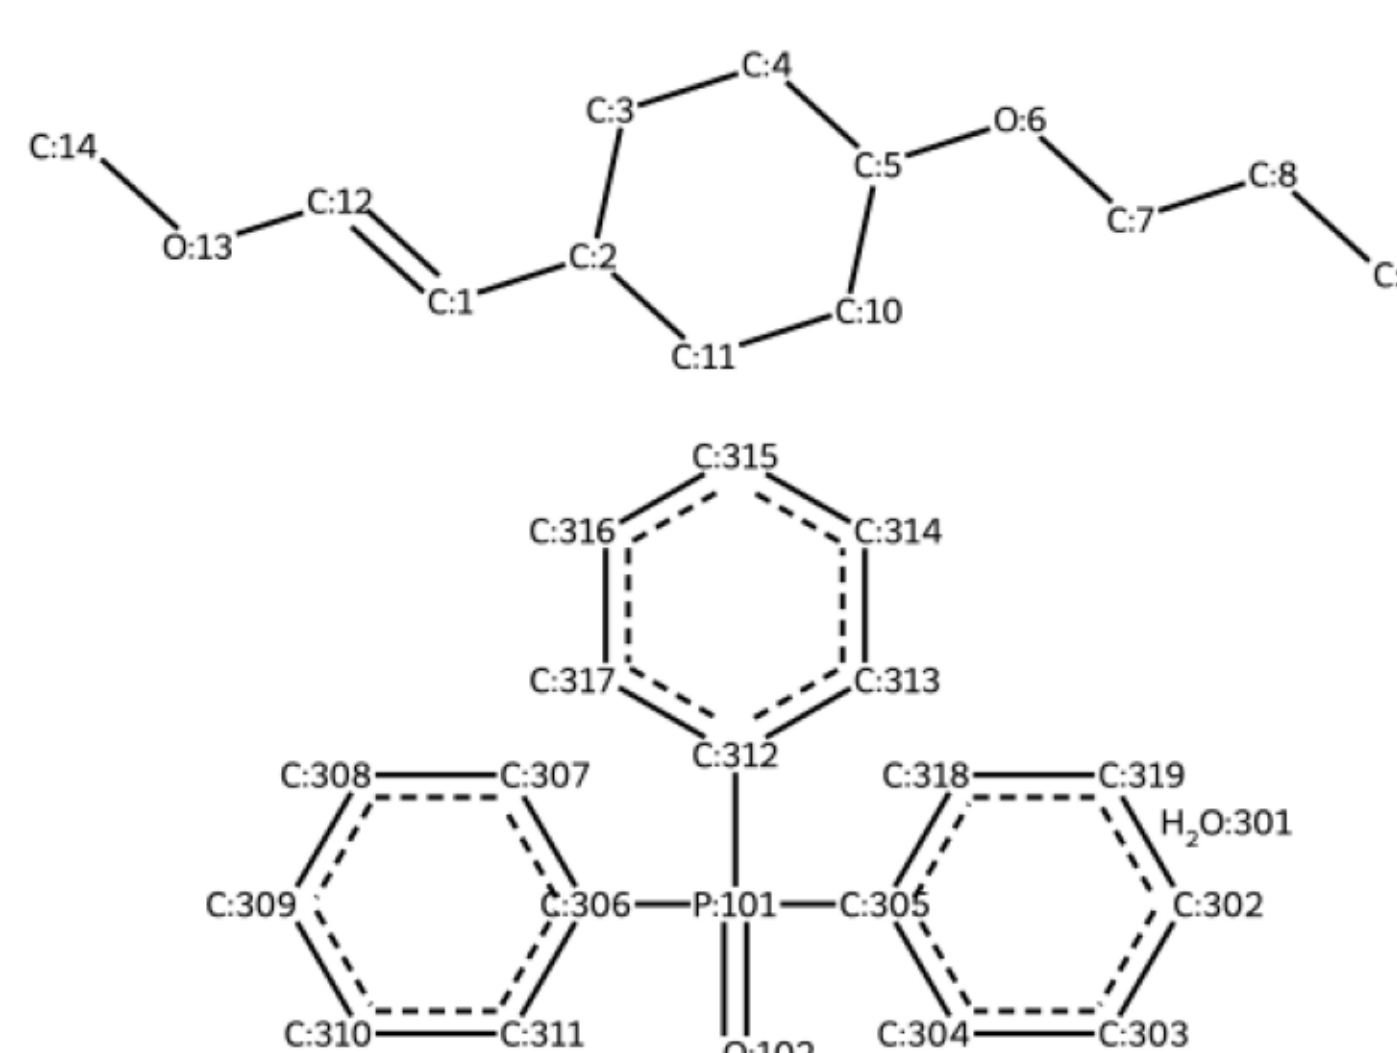

Original reaction  
sampled RXN\_ID:49)

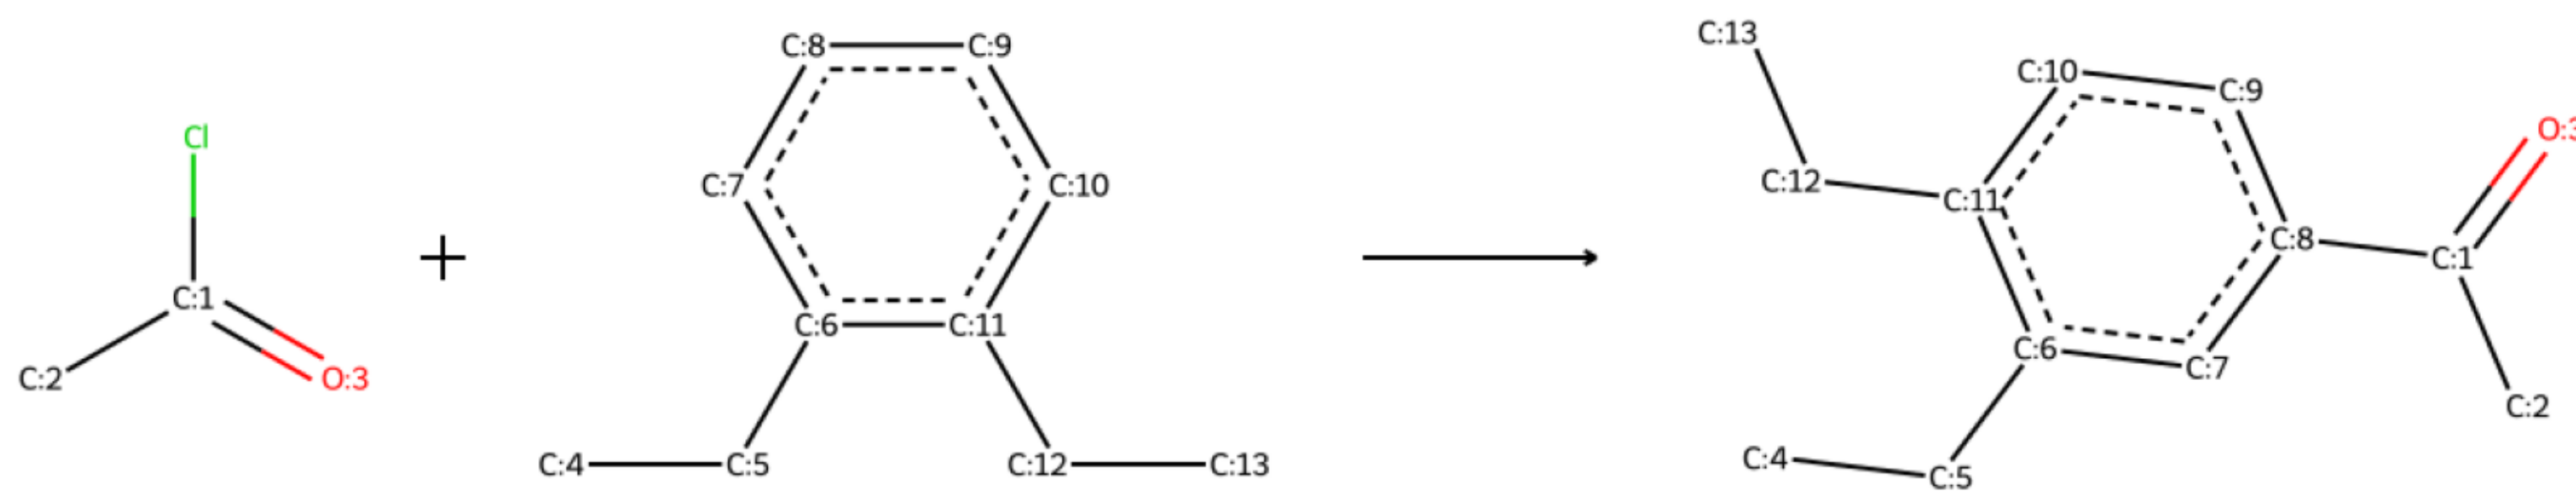

Identified mechanistic class -  
Friedel\_Crafts\_acylation reaction

Reaction with missing reagents recovered

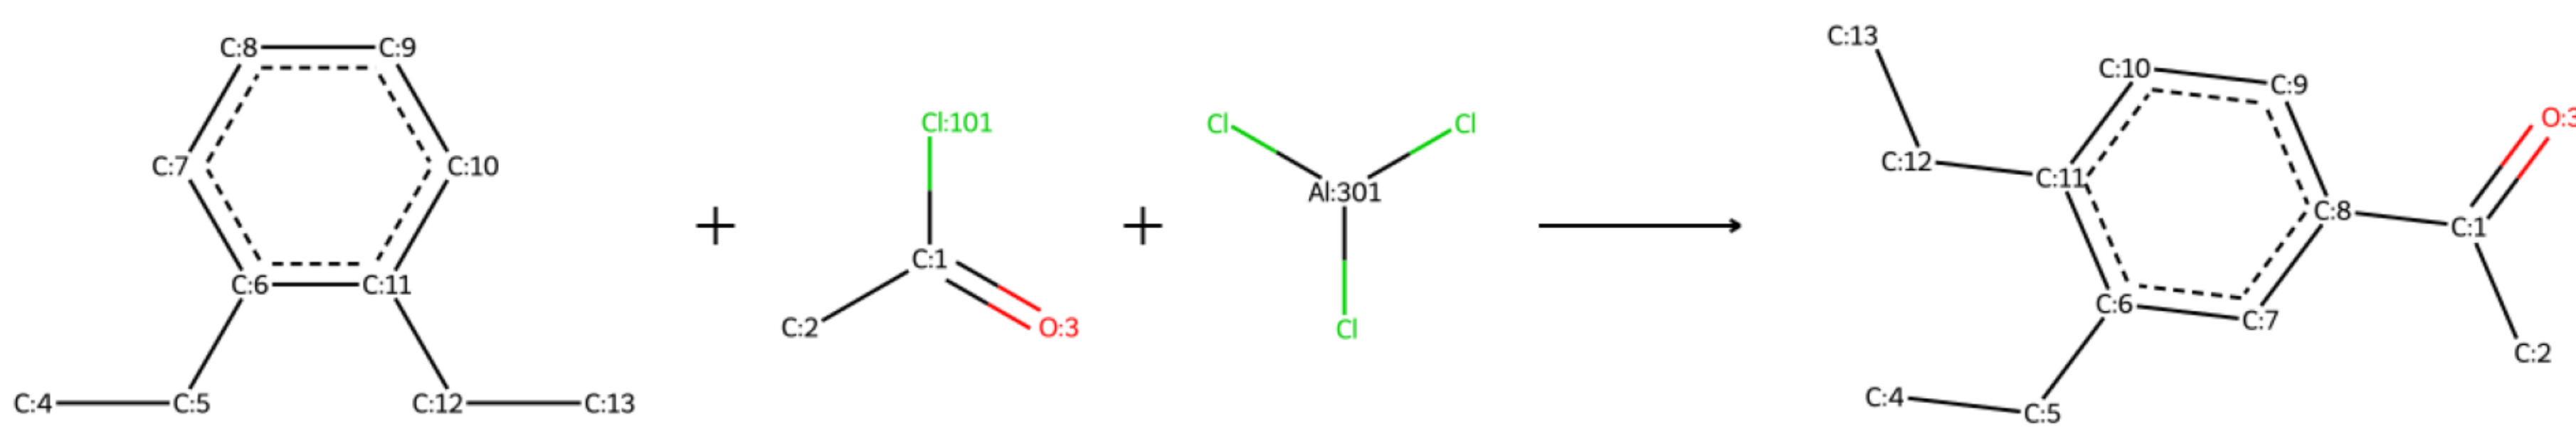

Proposed mechanistic pathway

[Arrow order: (1) green, (2) blue, (3) red, (4) orange]

step #1

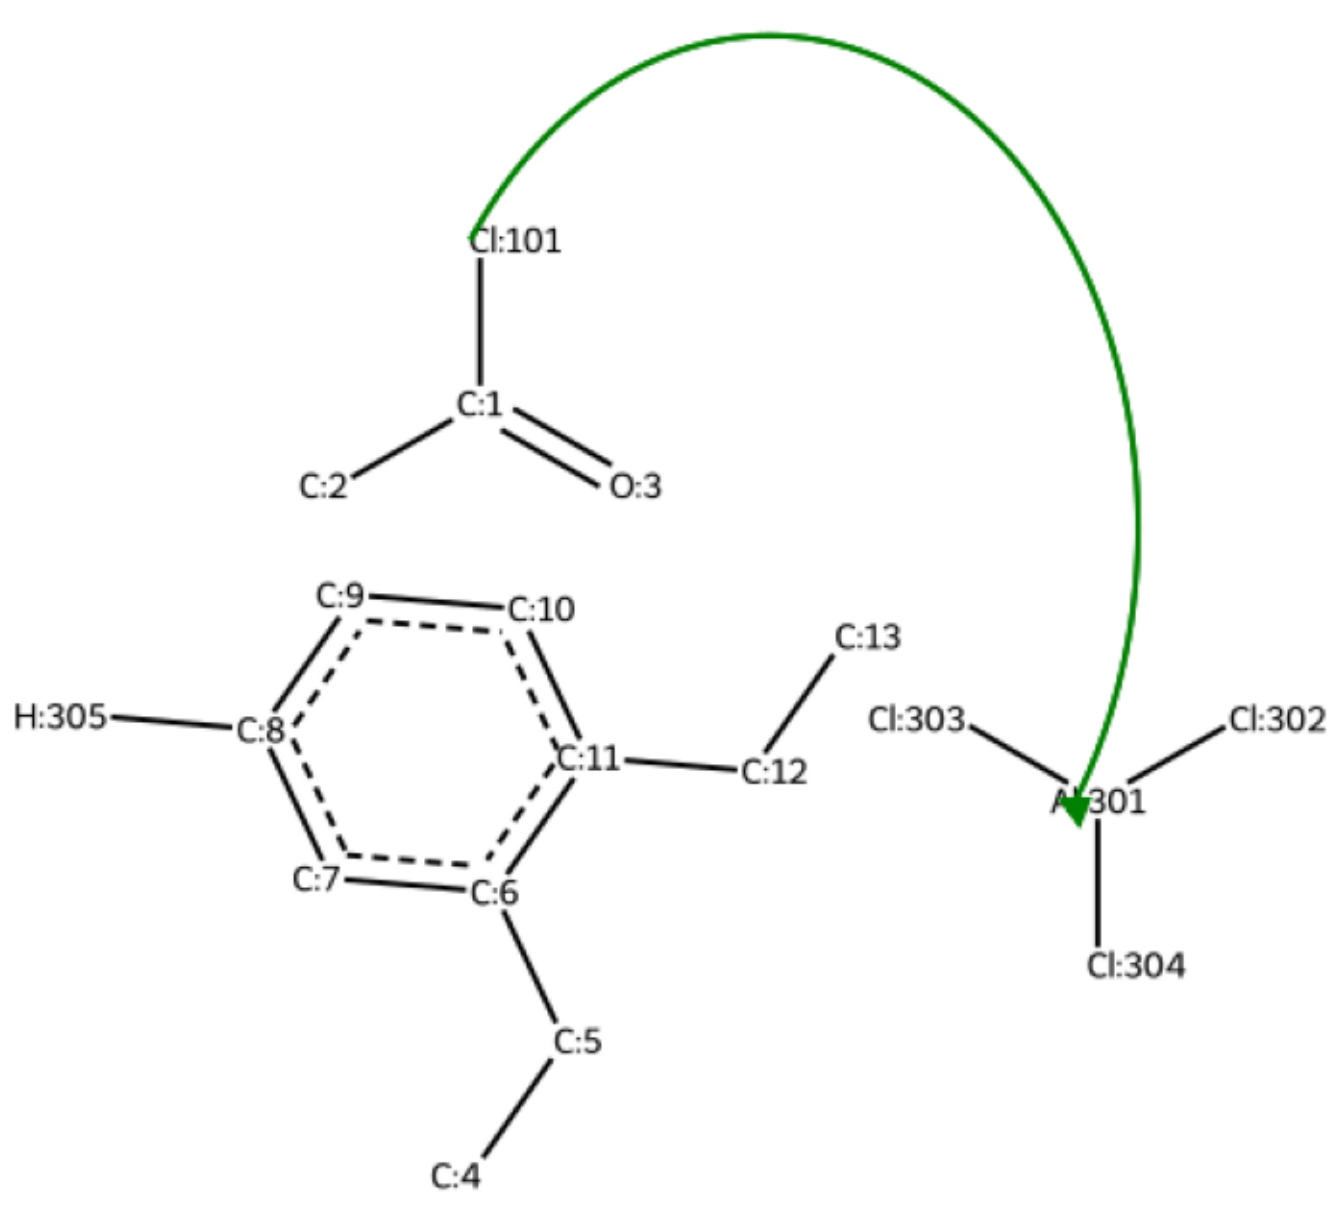

step #2

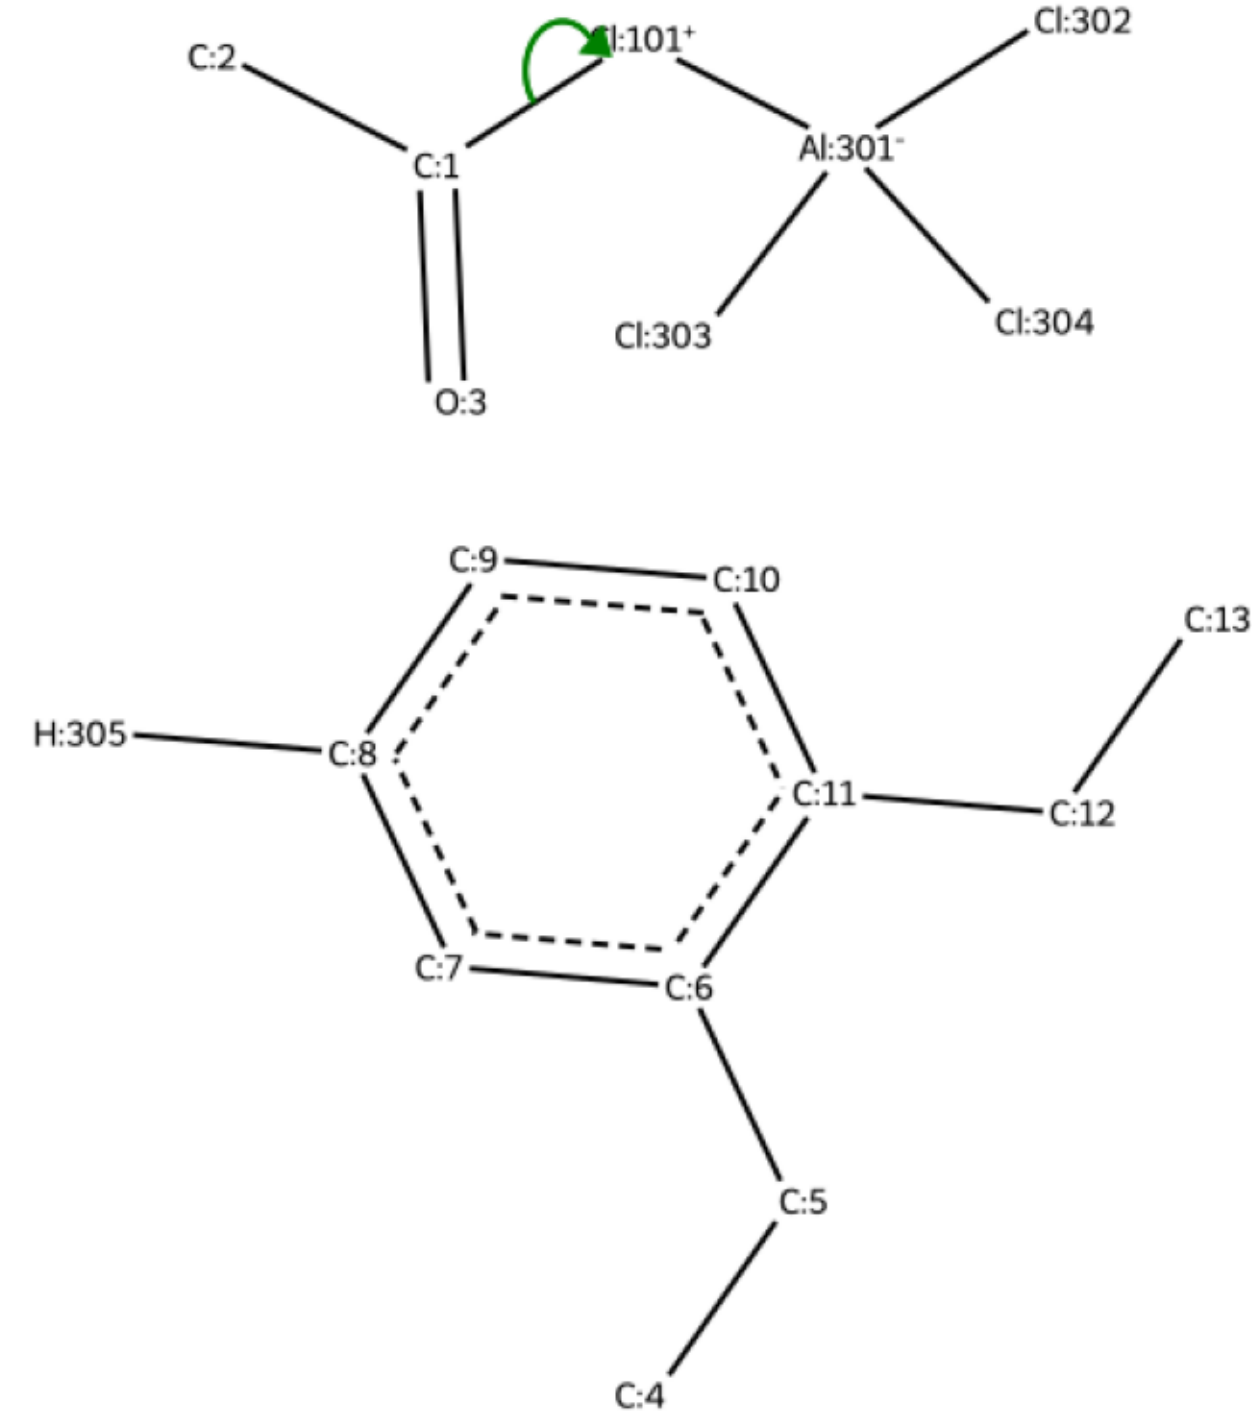

step #3

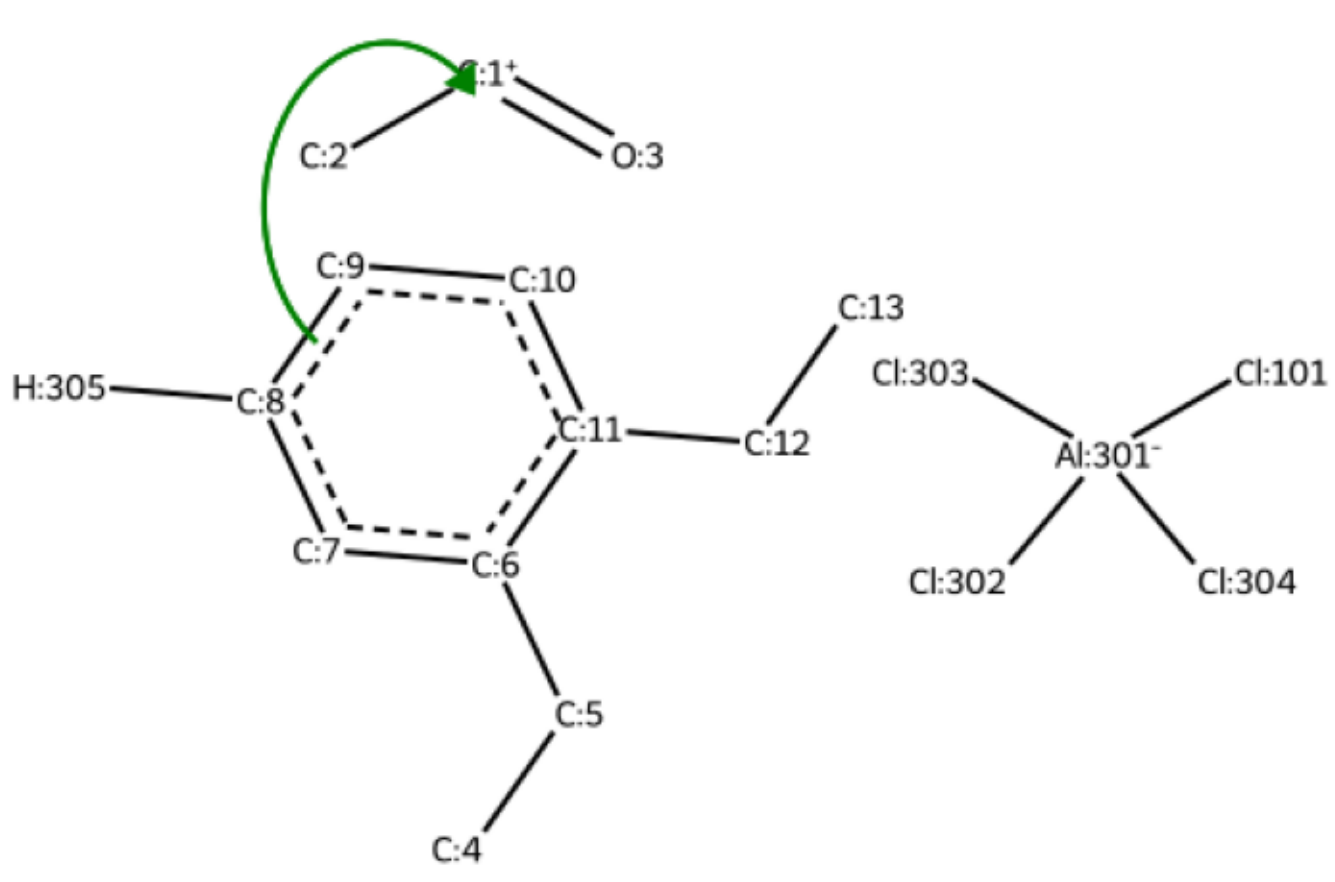

step #4

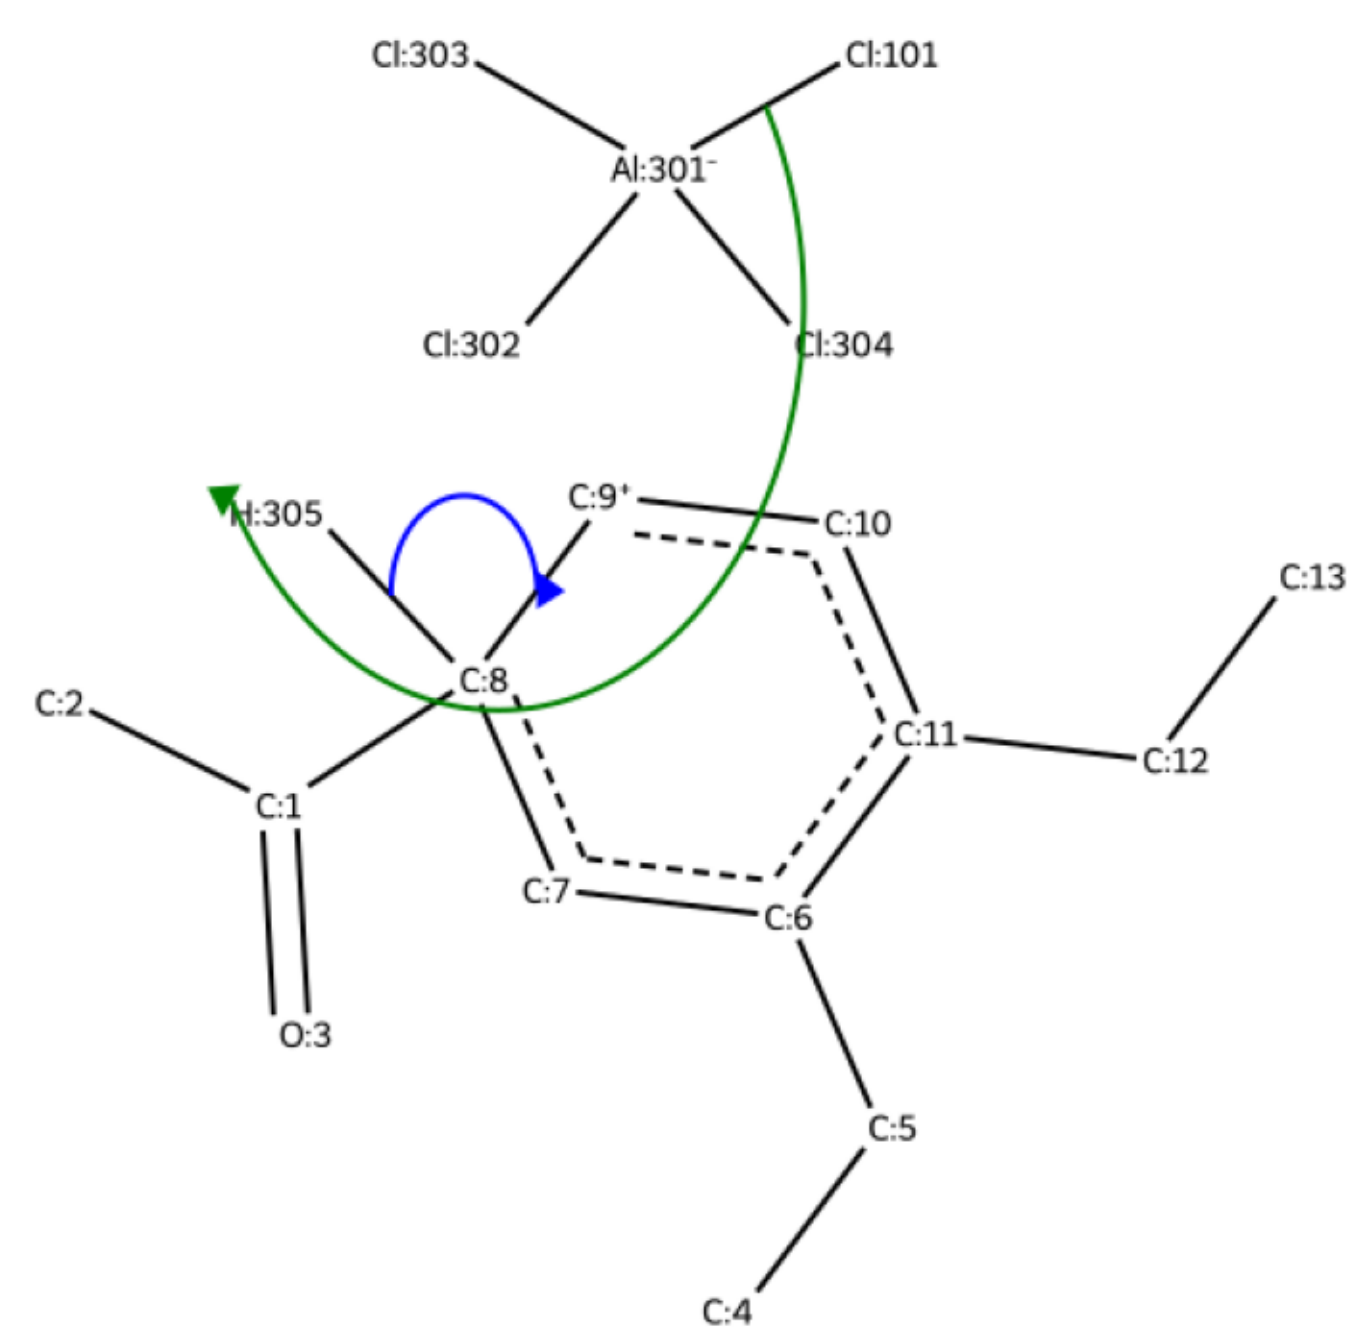

Product(s)

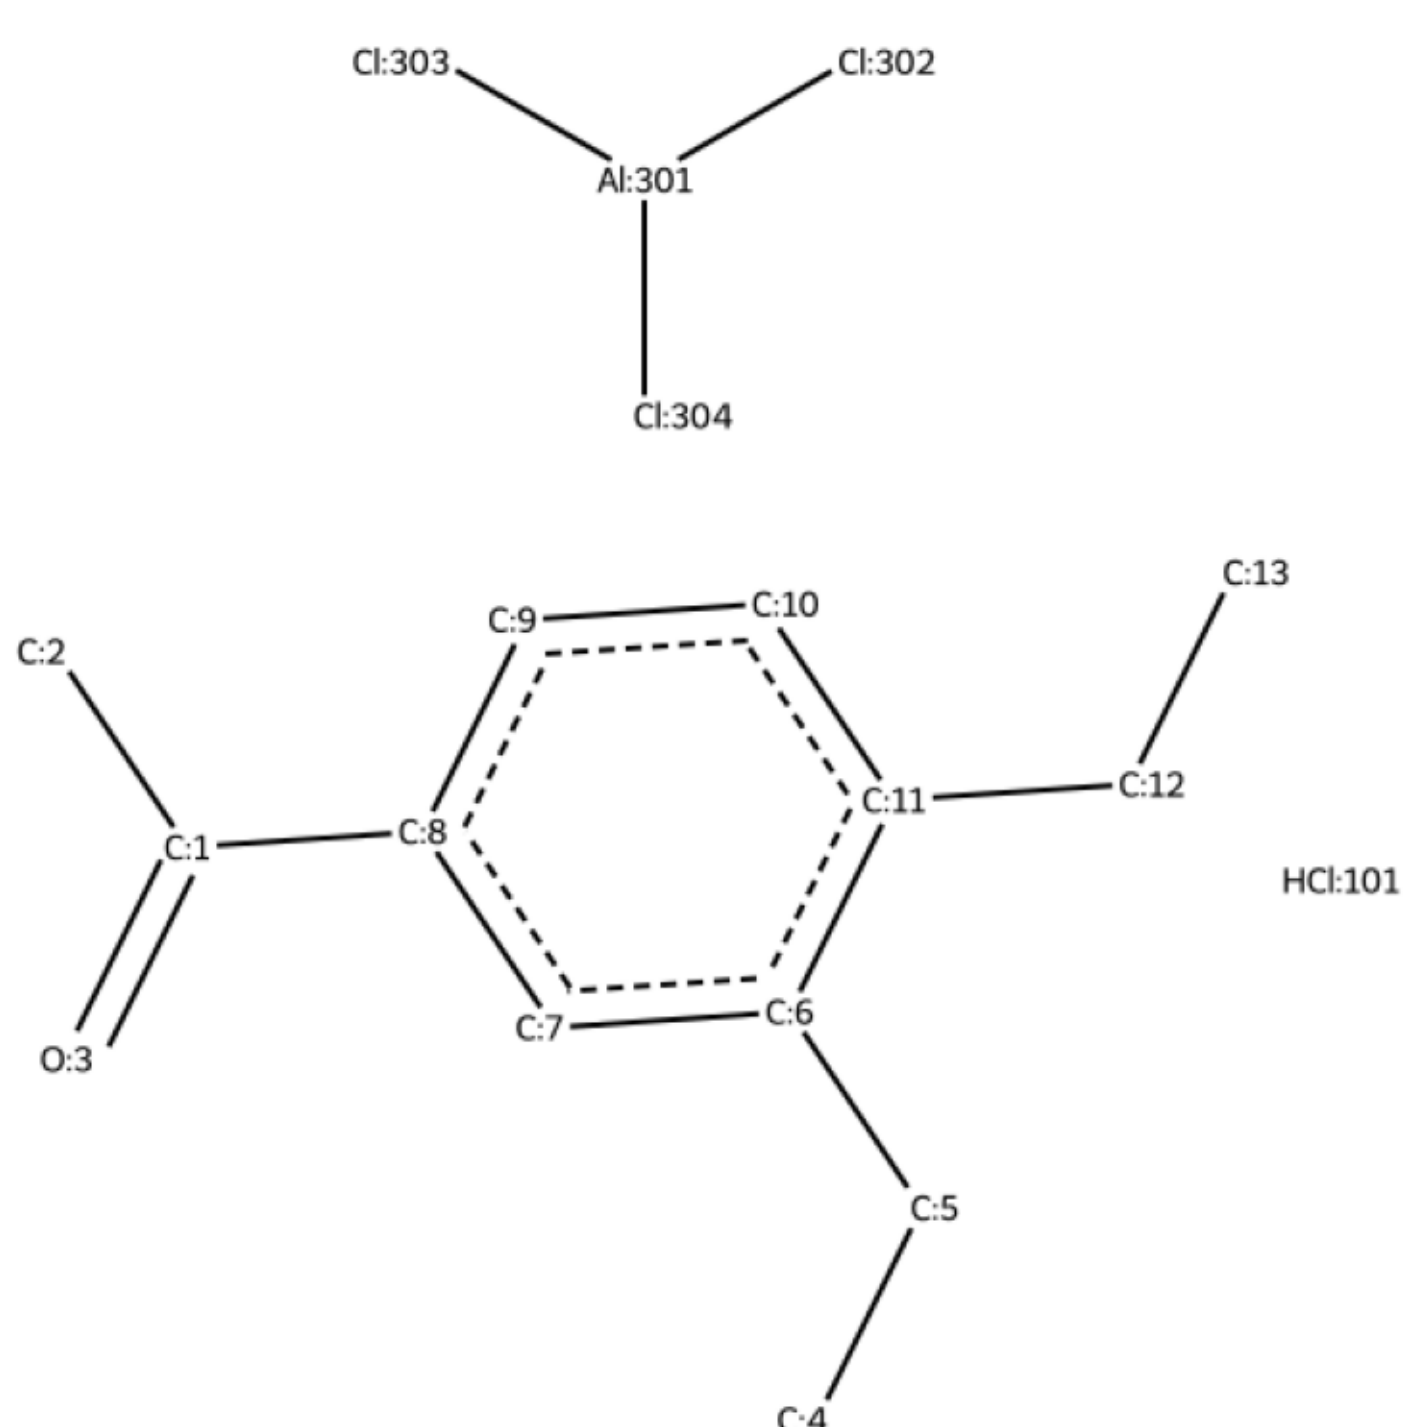



Original reaction  
sampled RXN\_ID:50)

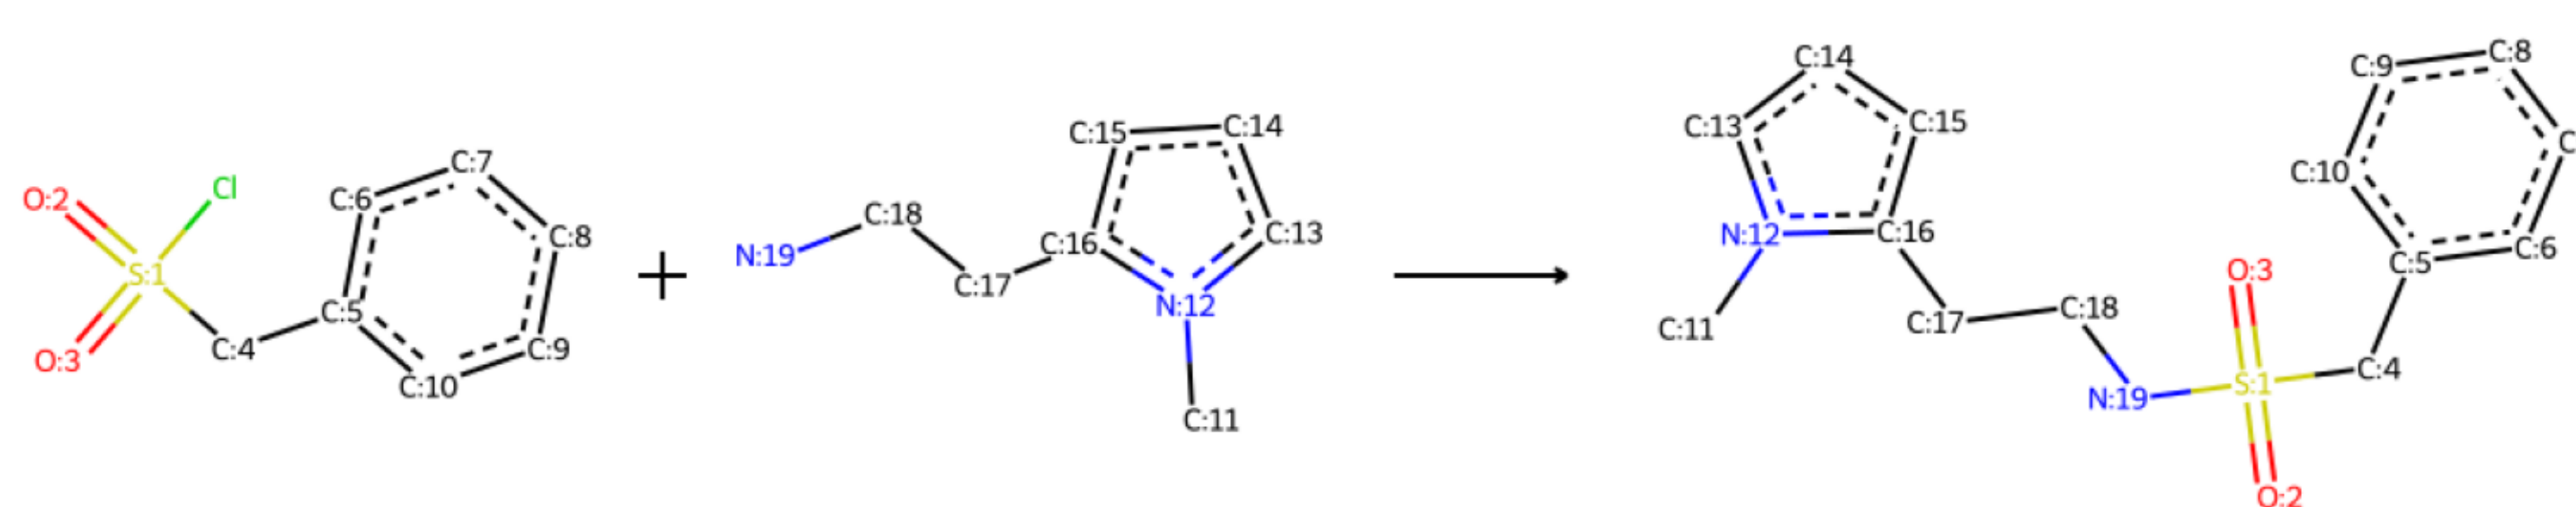

Identified mechanistic class -  
nucleophilic\_attack\_to\_(thio)carbonyl\_or\_sulfonyl reaction

Reaction with missing reagents recovered

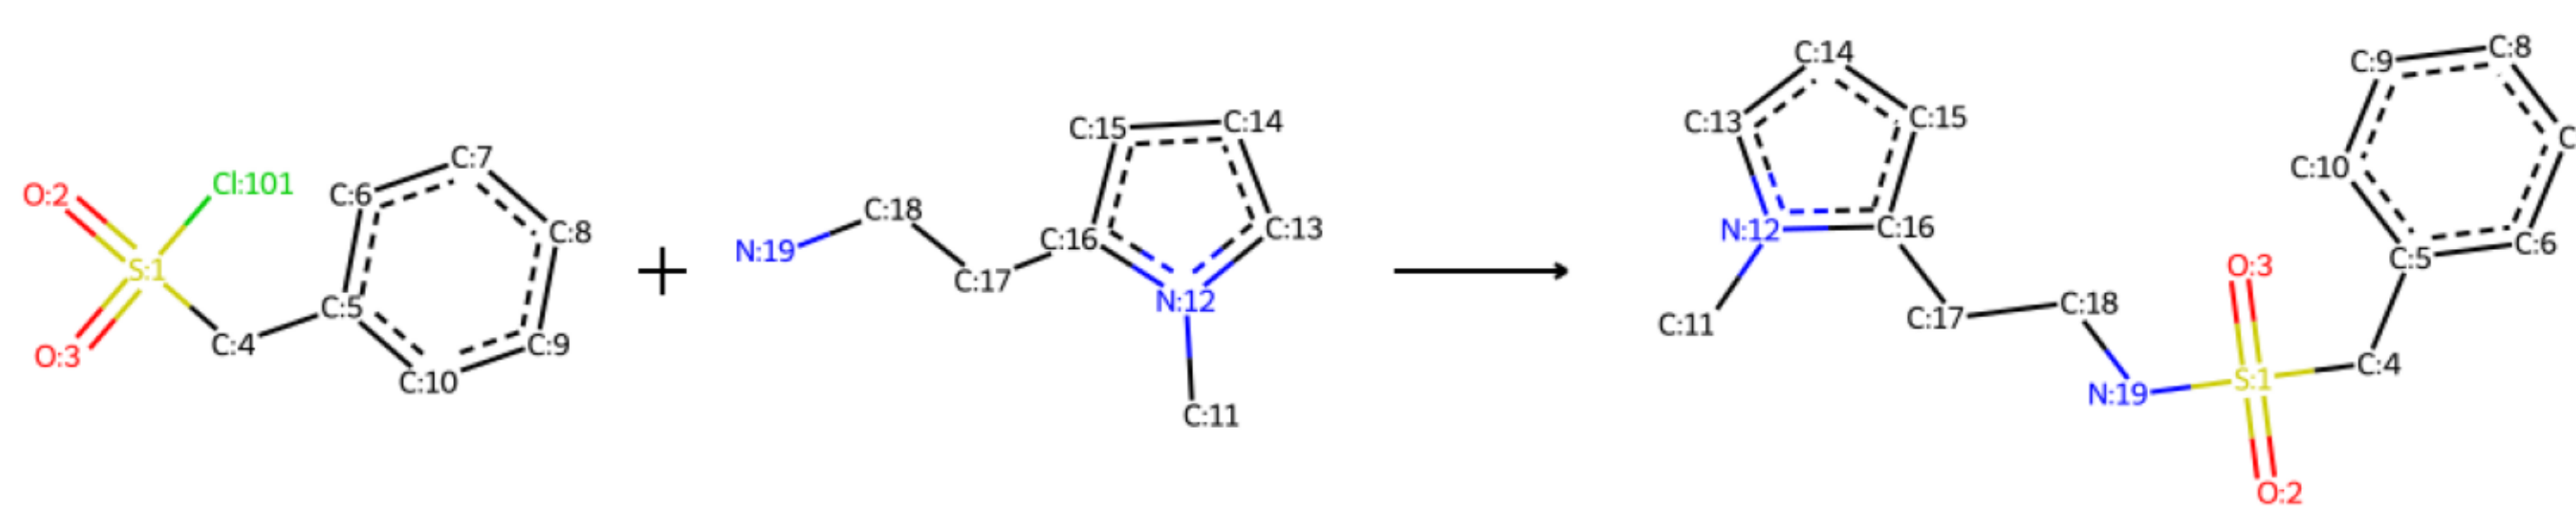

Proposed mechanistic pathway

[Arrow order: (1) green, (2) blue, (3) red, (4) orange]

step #1

step #2

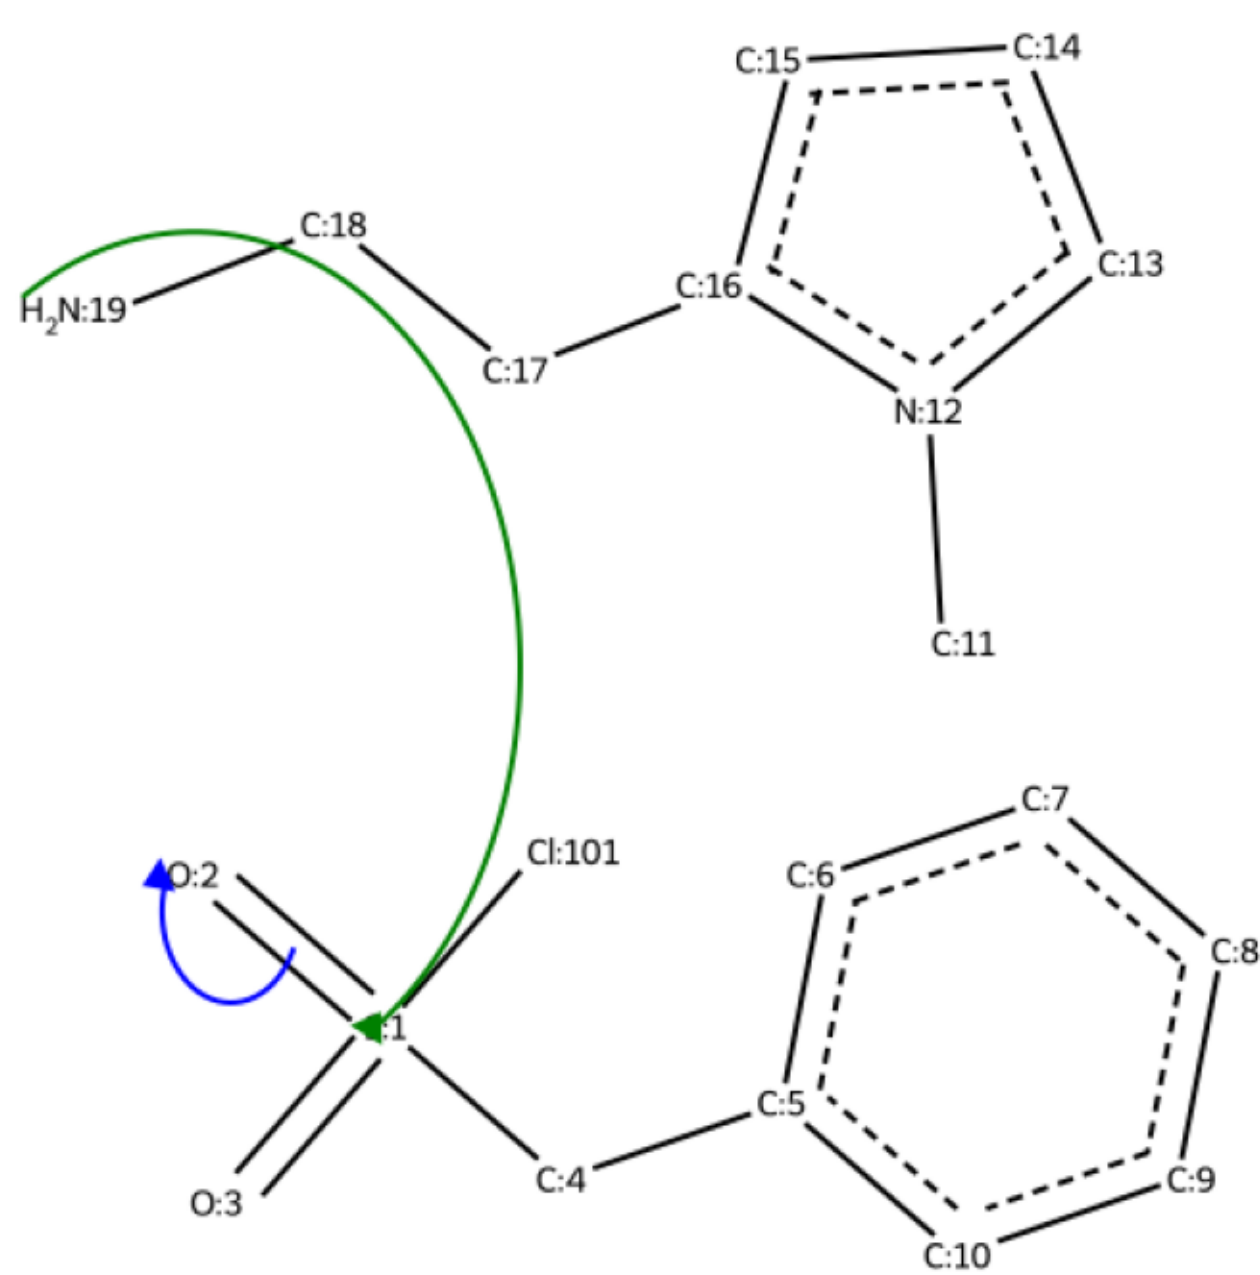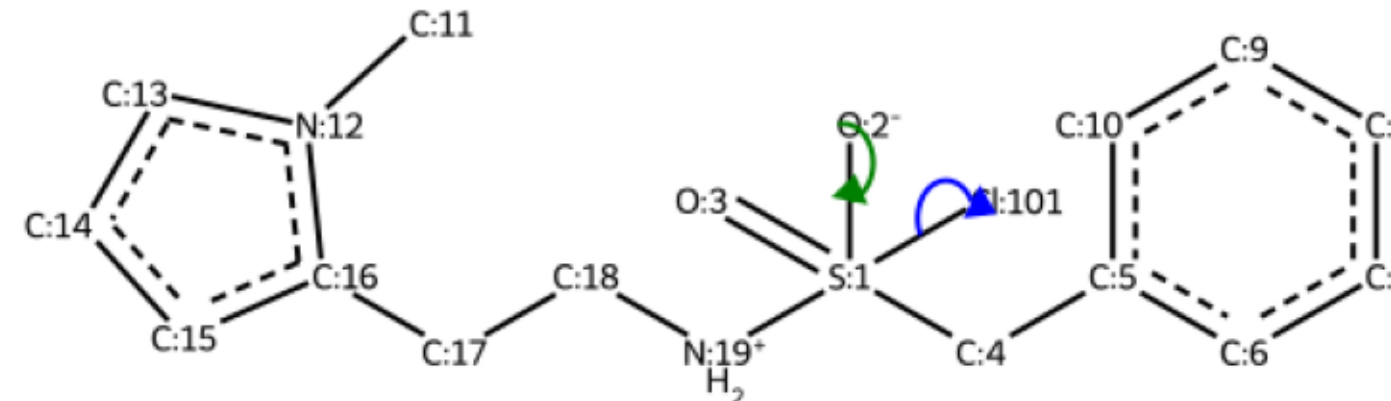

Product(s)

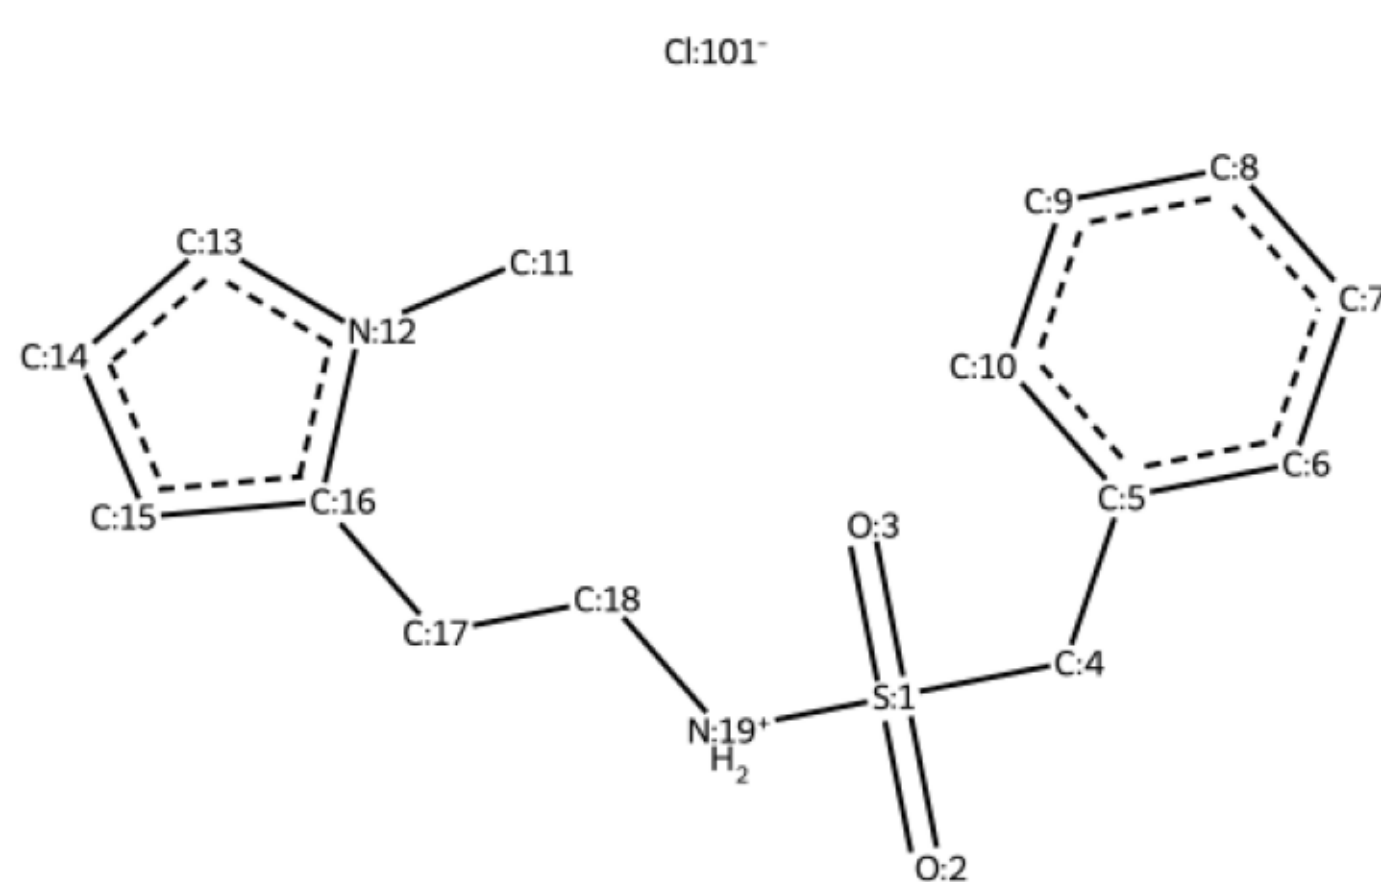

proton transfer

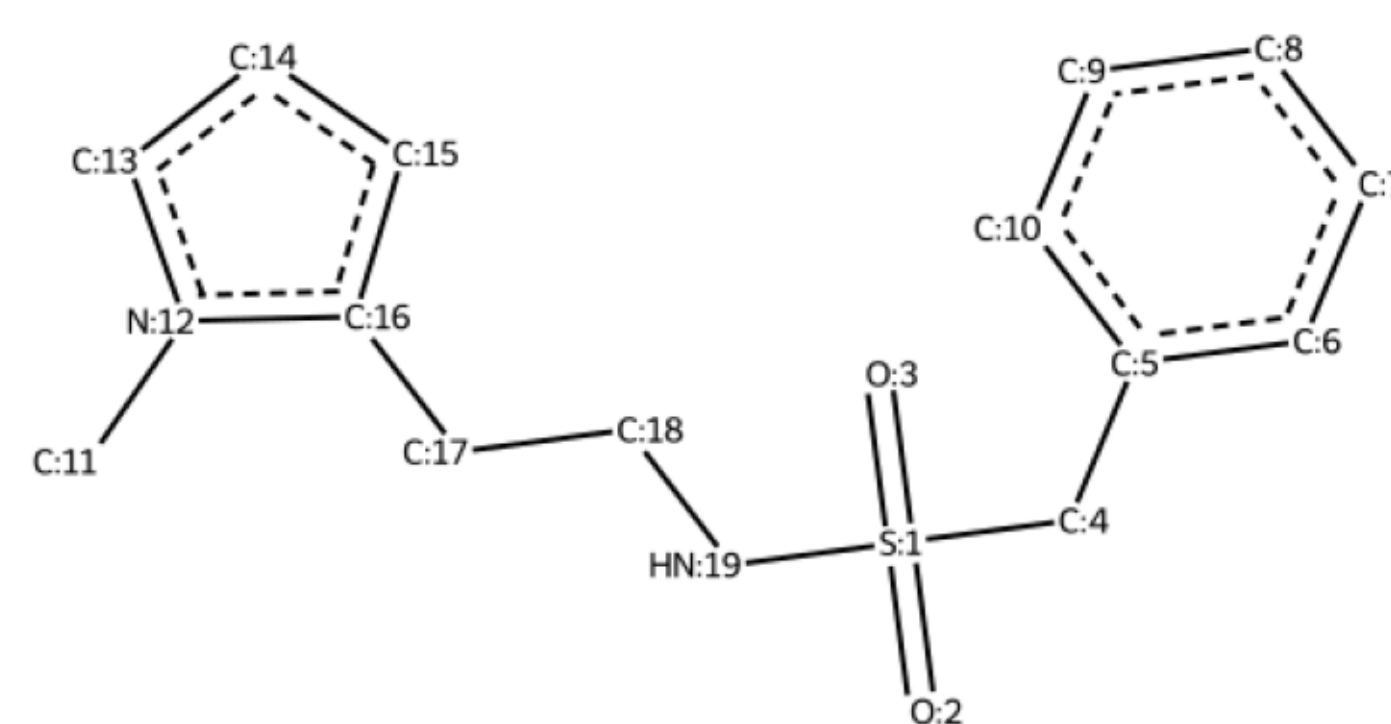

Original reaction  
sampled RXN\_ID:51)

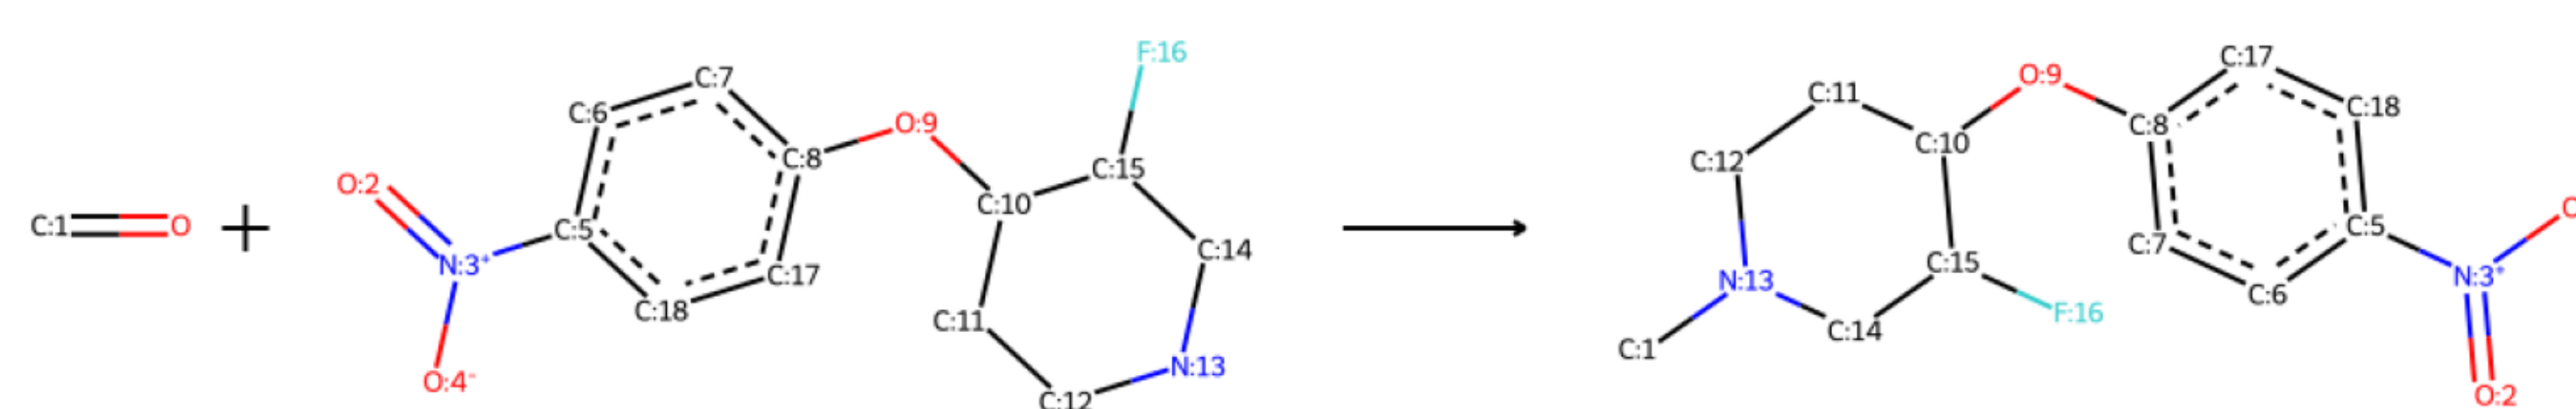

Identified mechanistic class -  
reductive\_amination reaction

Reaction with missing reagents recovered

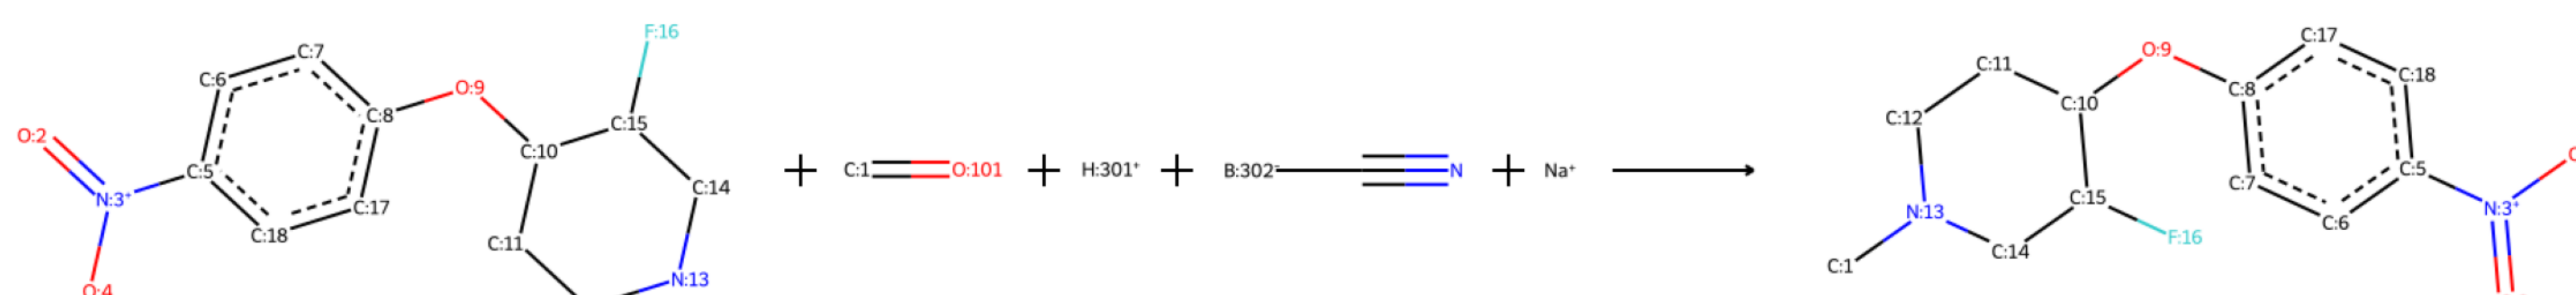

Proposed mechanistic pathway

[Arrow order: (1) green, (2) blue, (3) red, (4) orange]

step #1

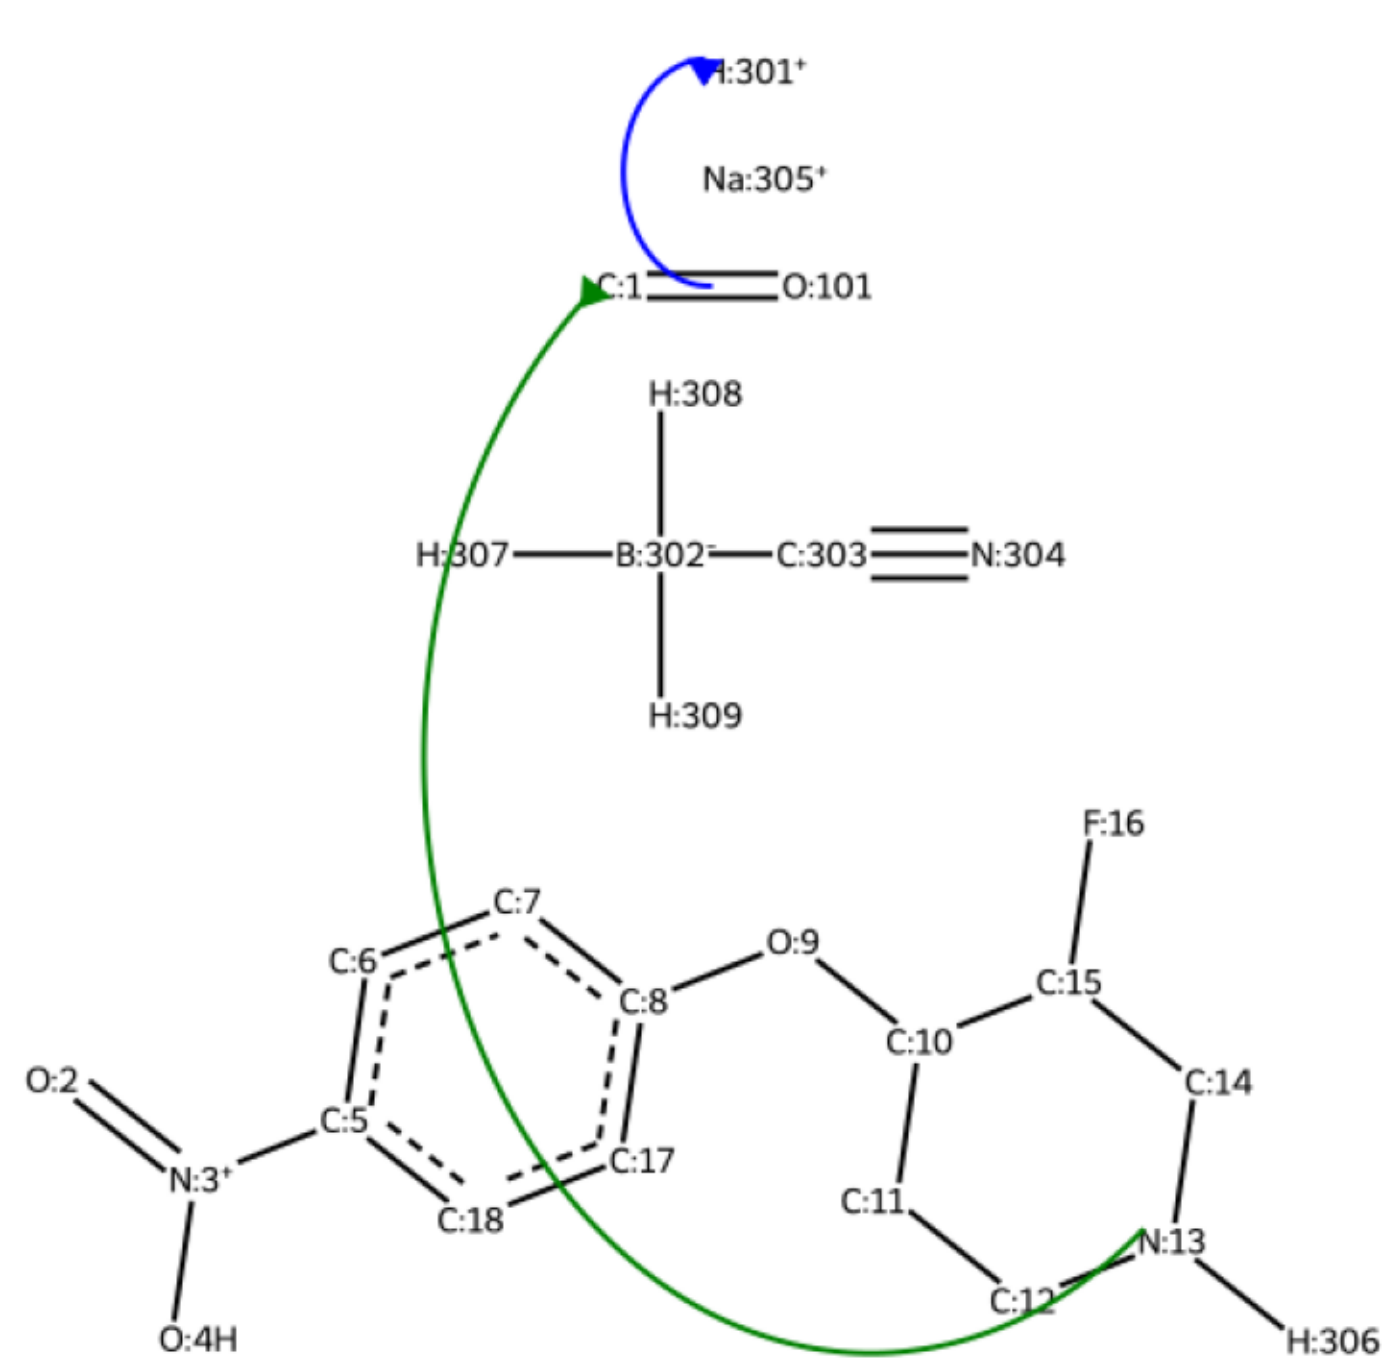



Original reaction  
sampled RXN\_ID:52)

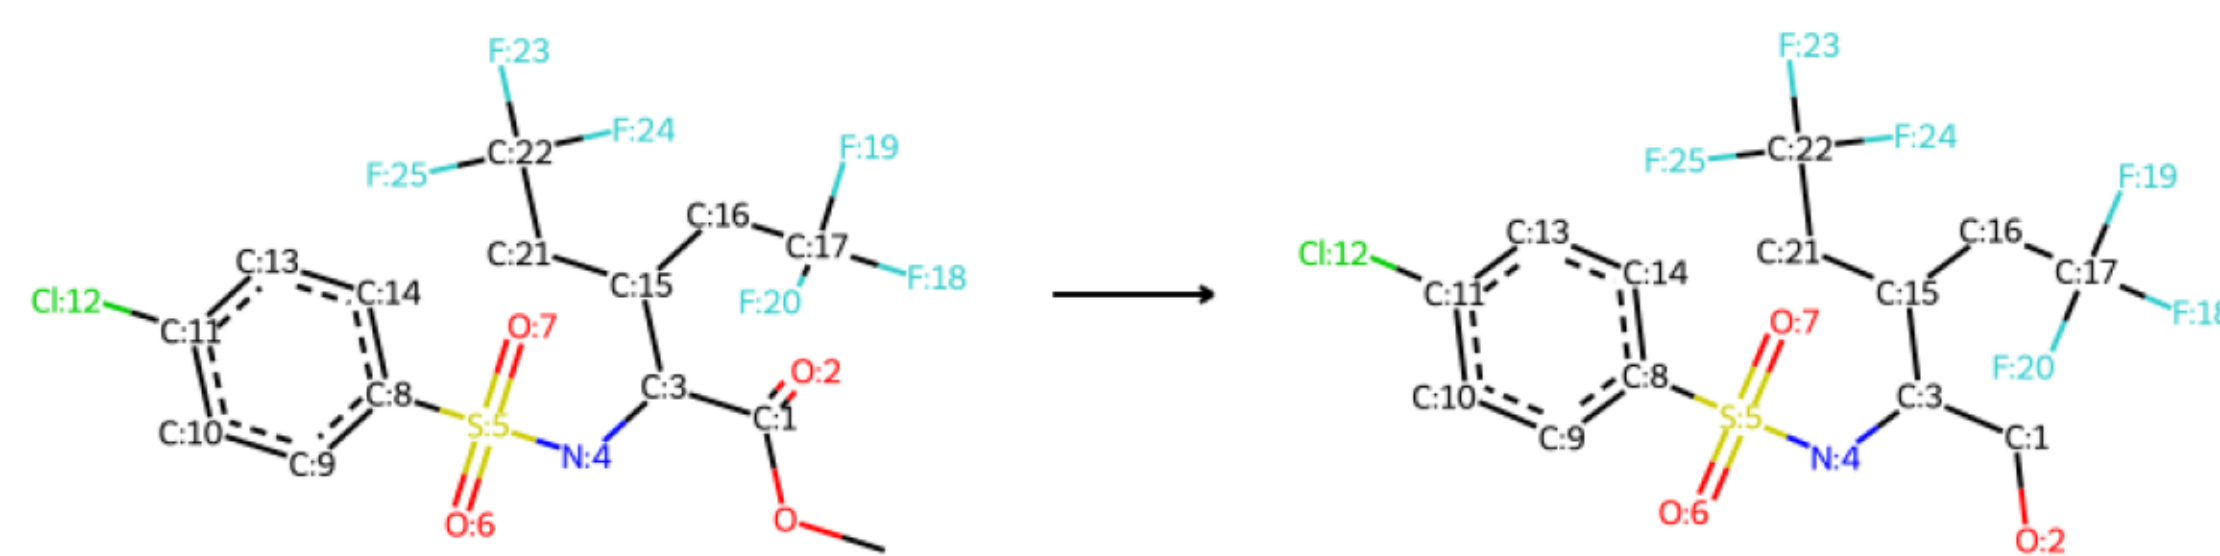

Identified mechanistic class -  
ester\_reduction reaction

Reaction with missing reagents recovered

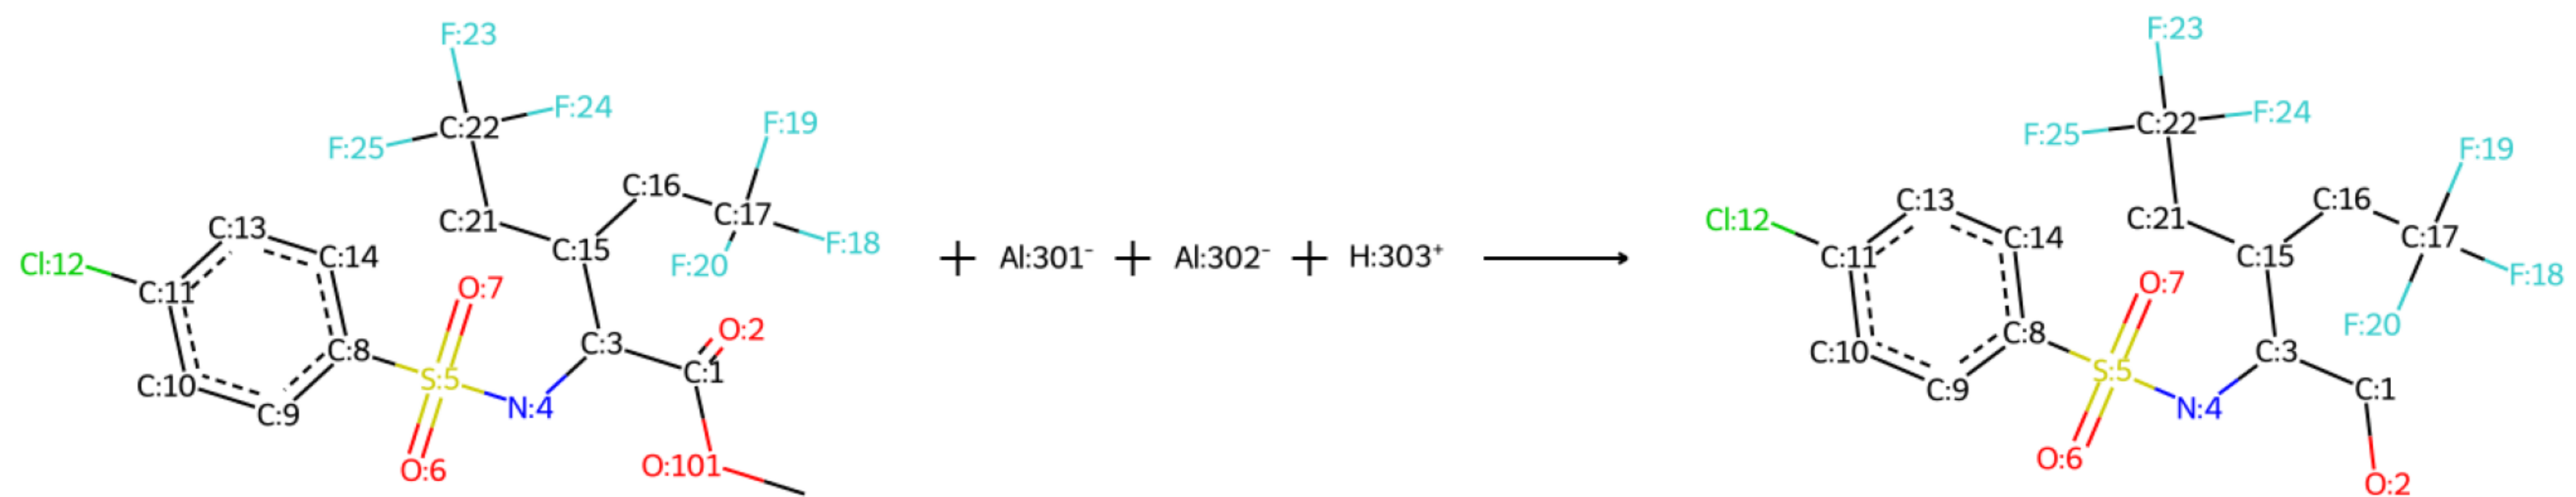

Proposed mechanistic pathway

[Arrow order: (1) green, (2) blue, (3) red, (4) orange]

step #1

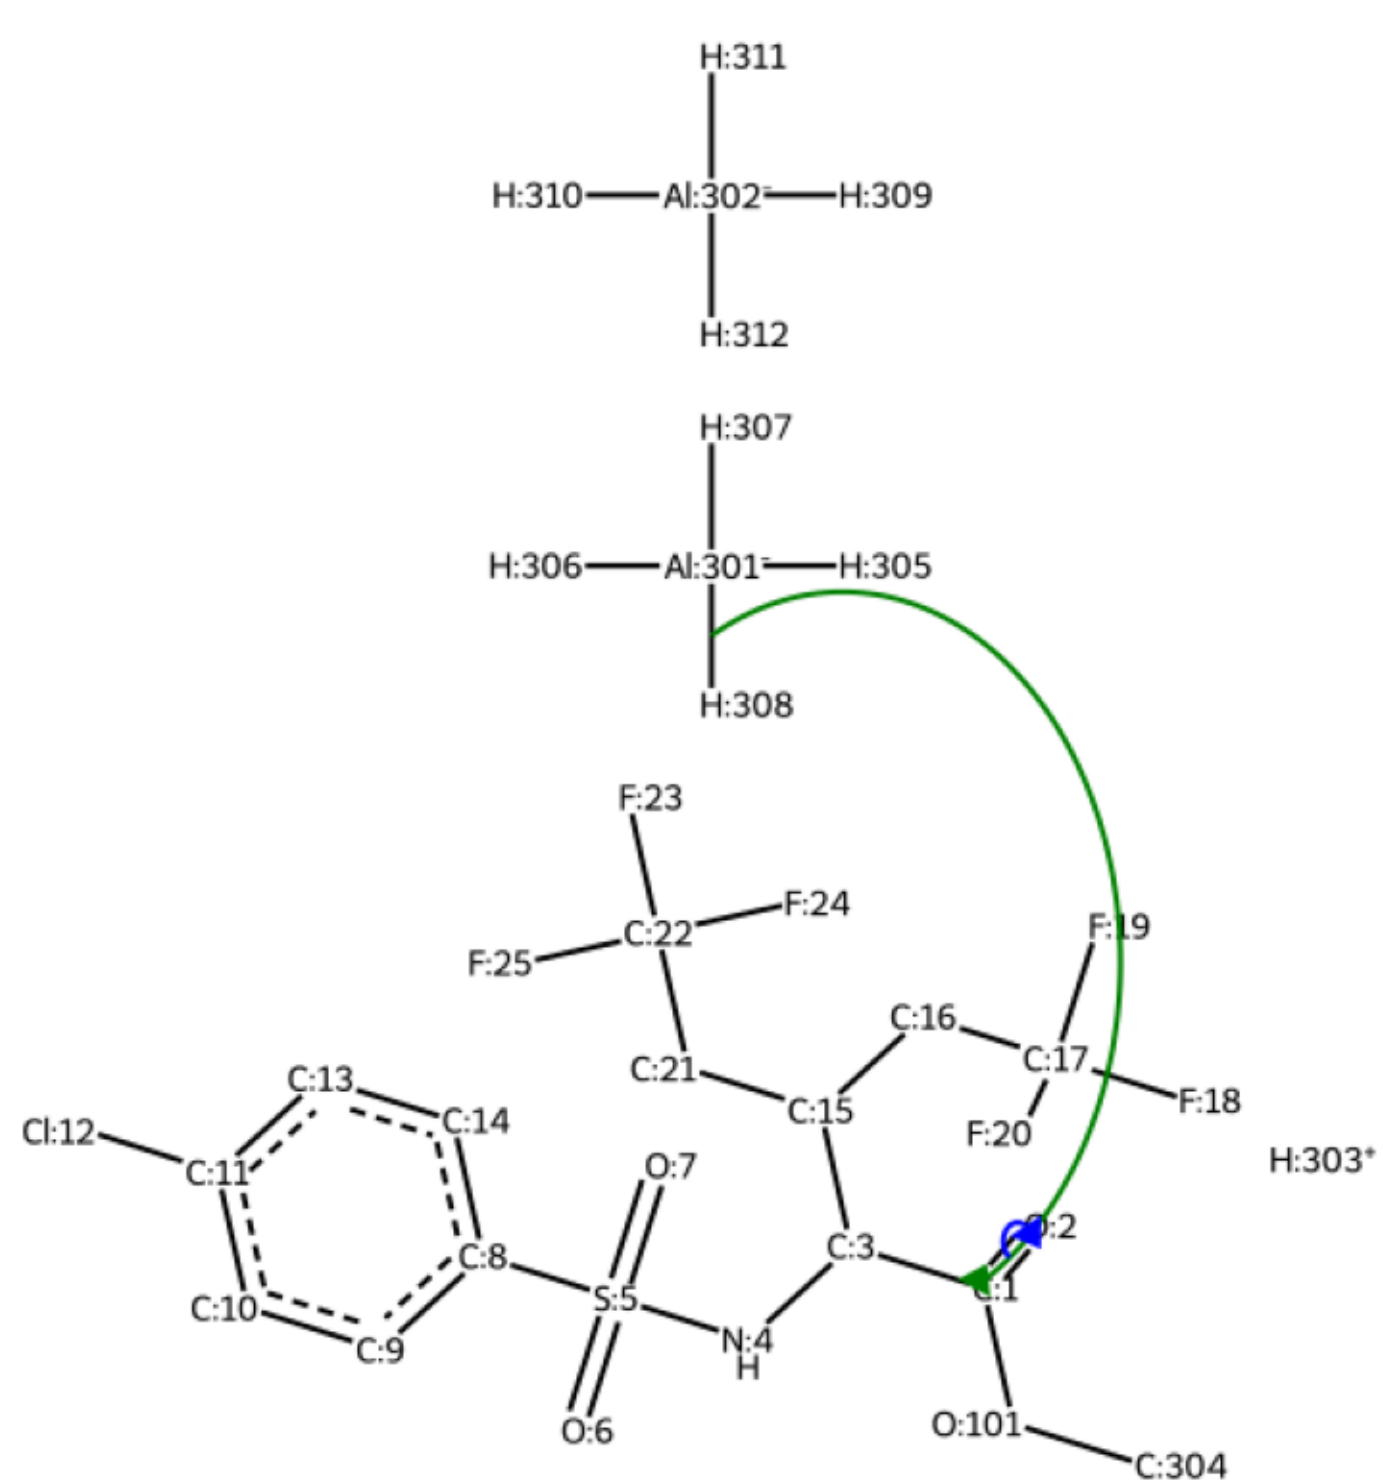

step #2

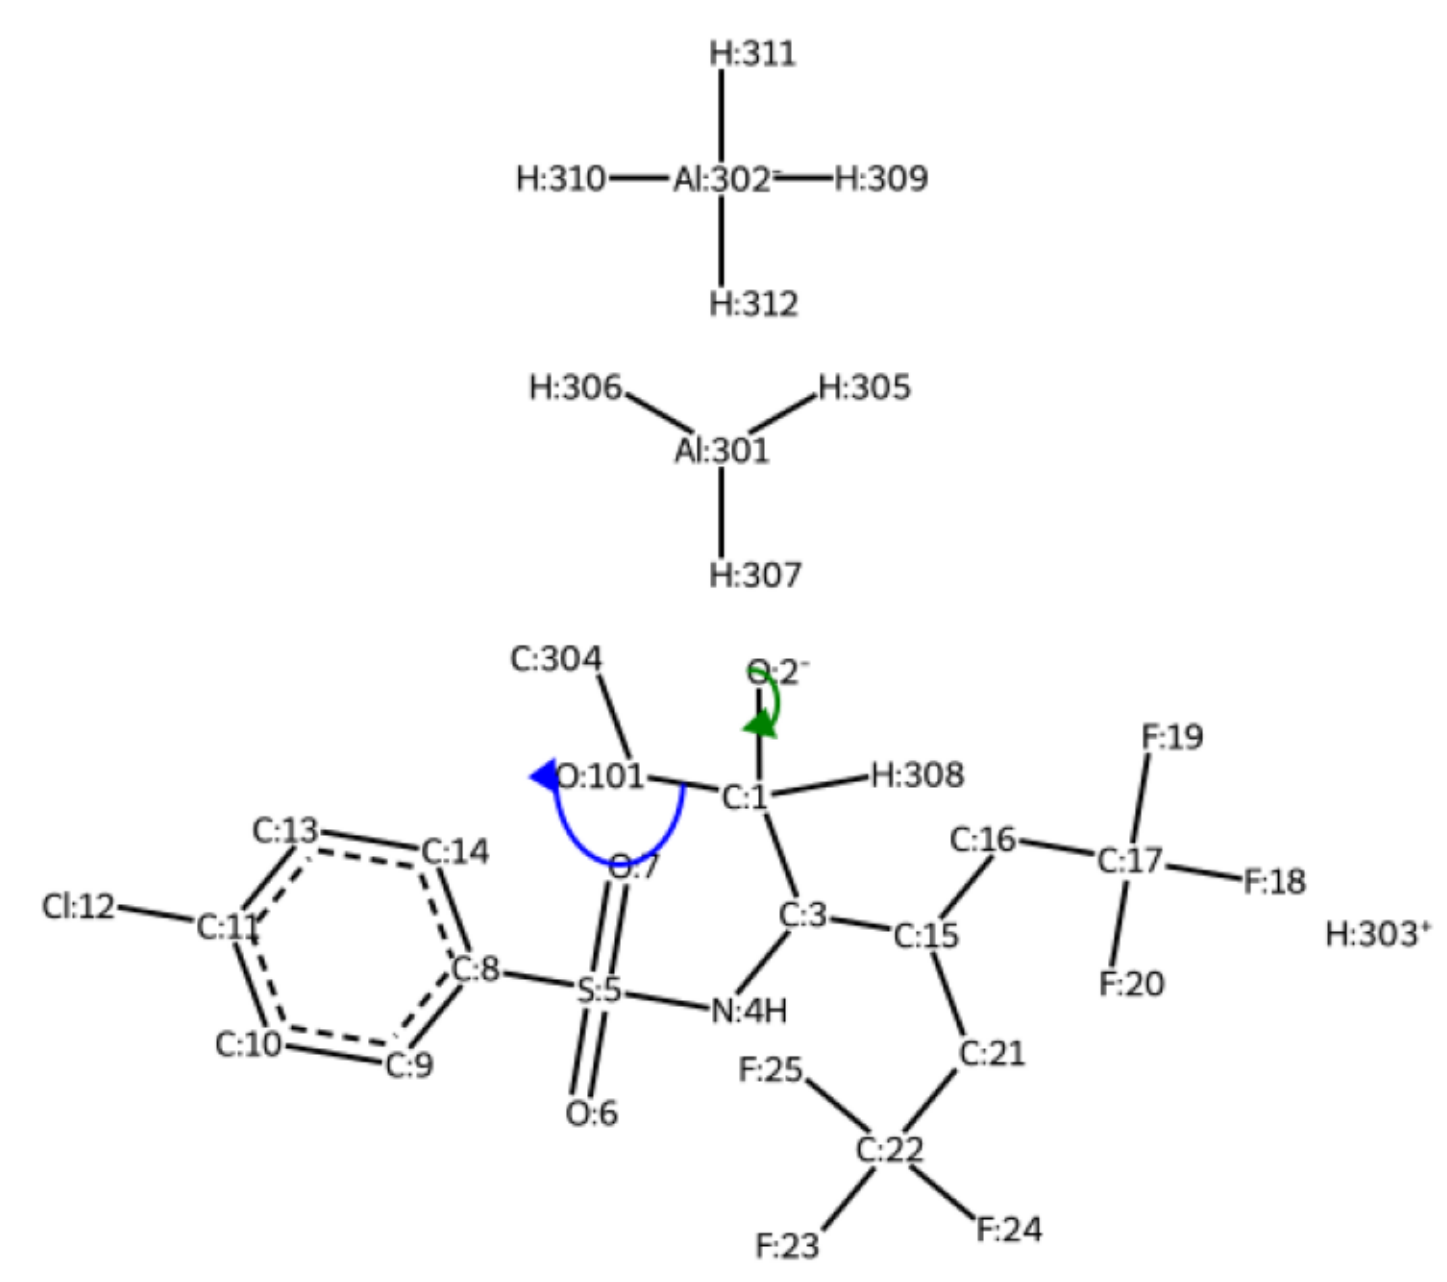

step #3

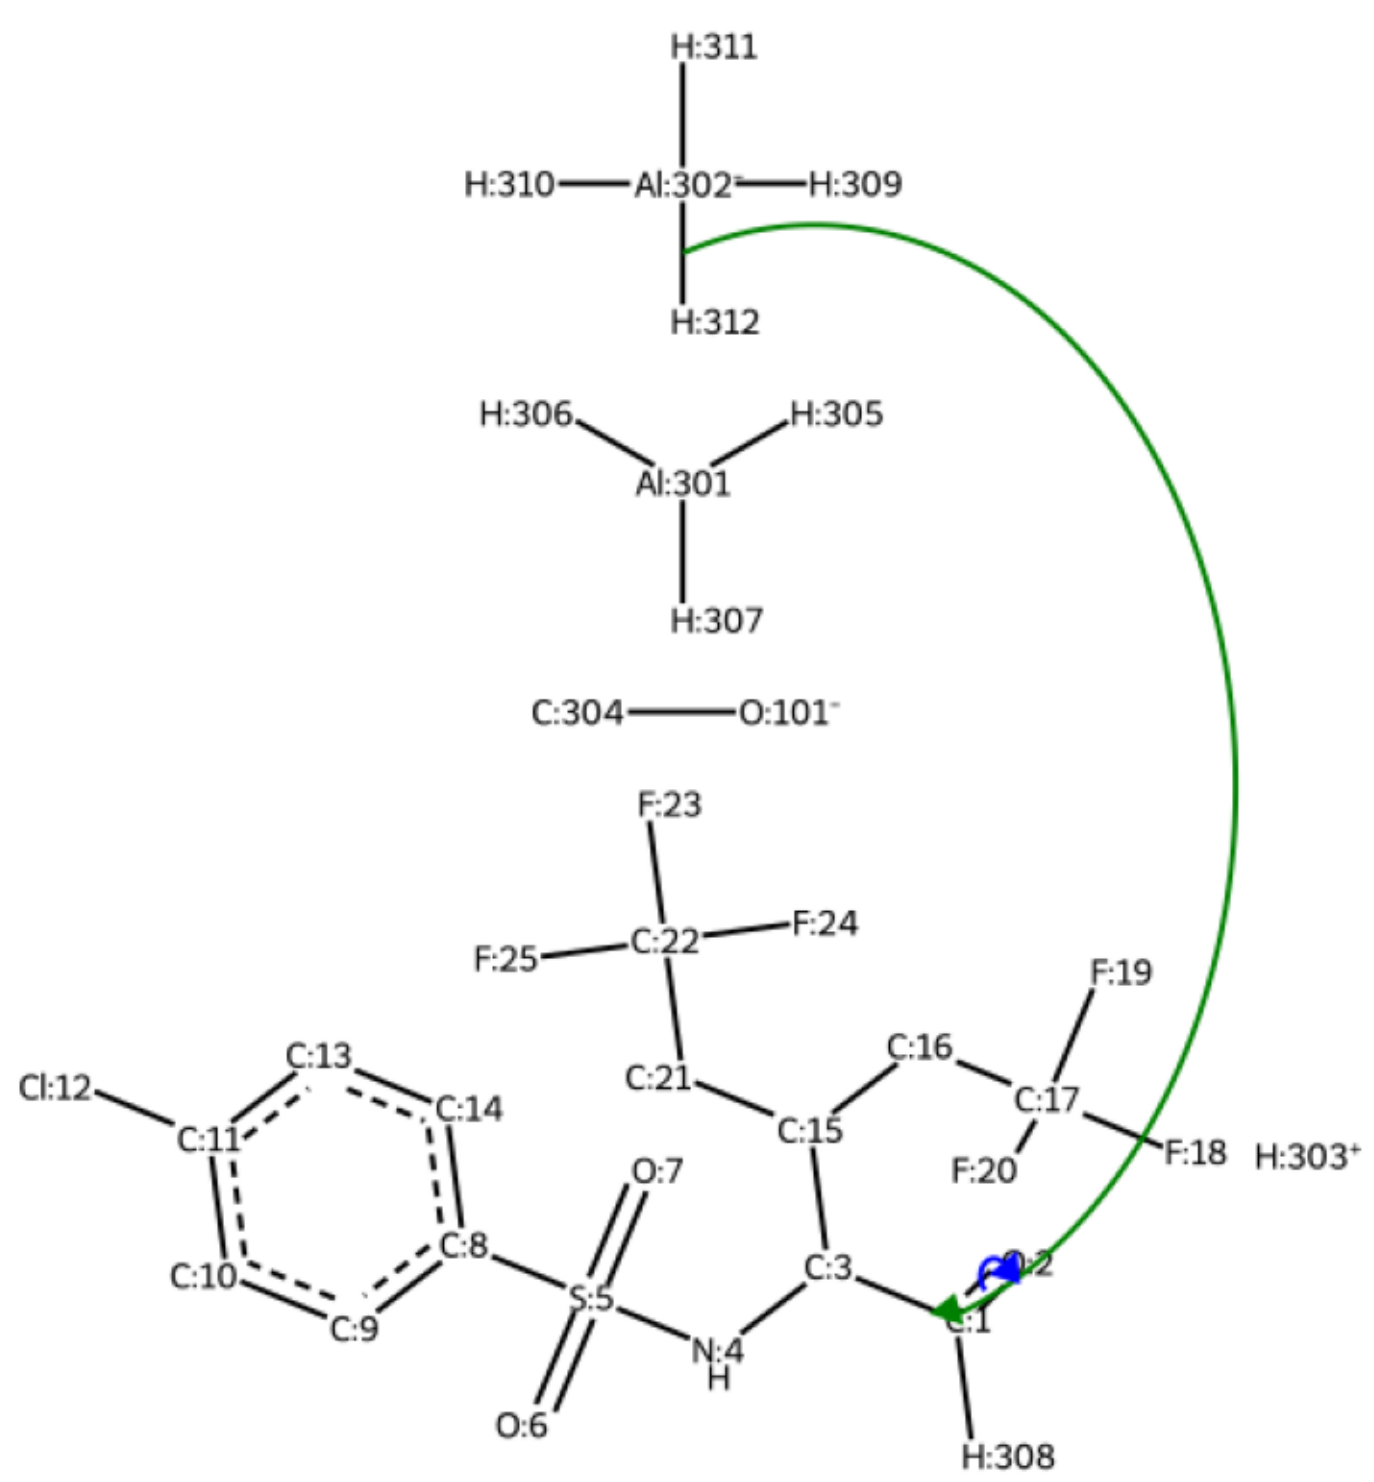

step #4

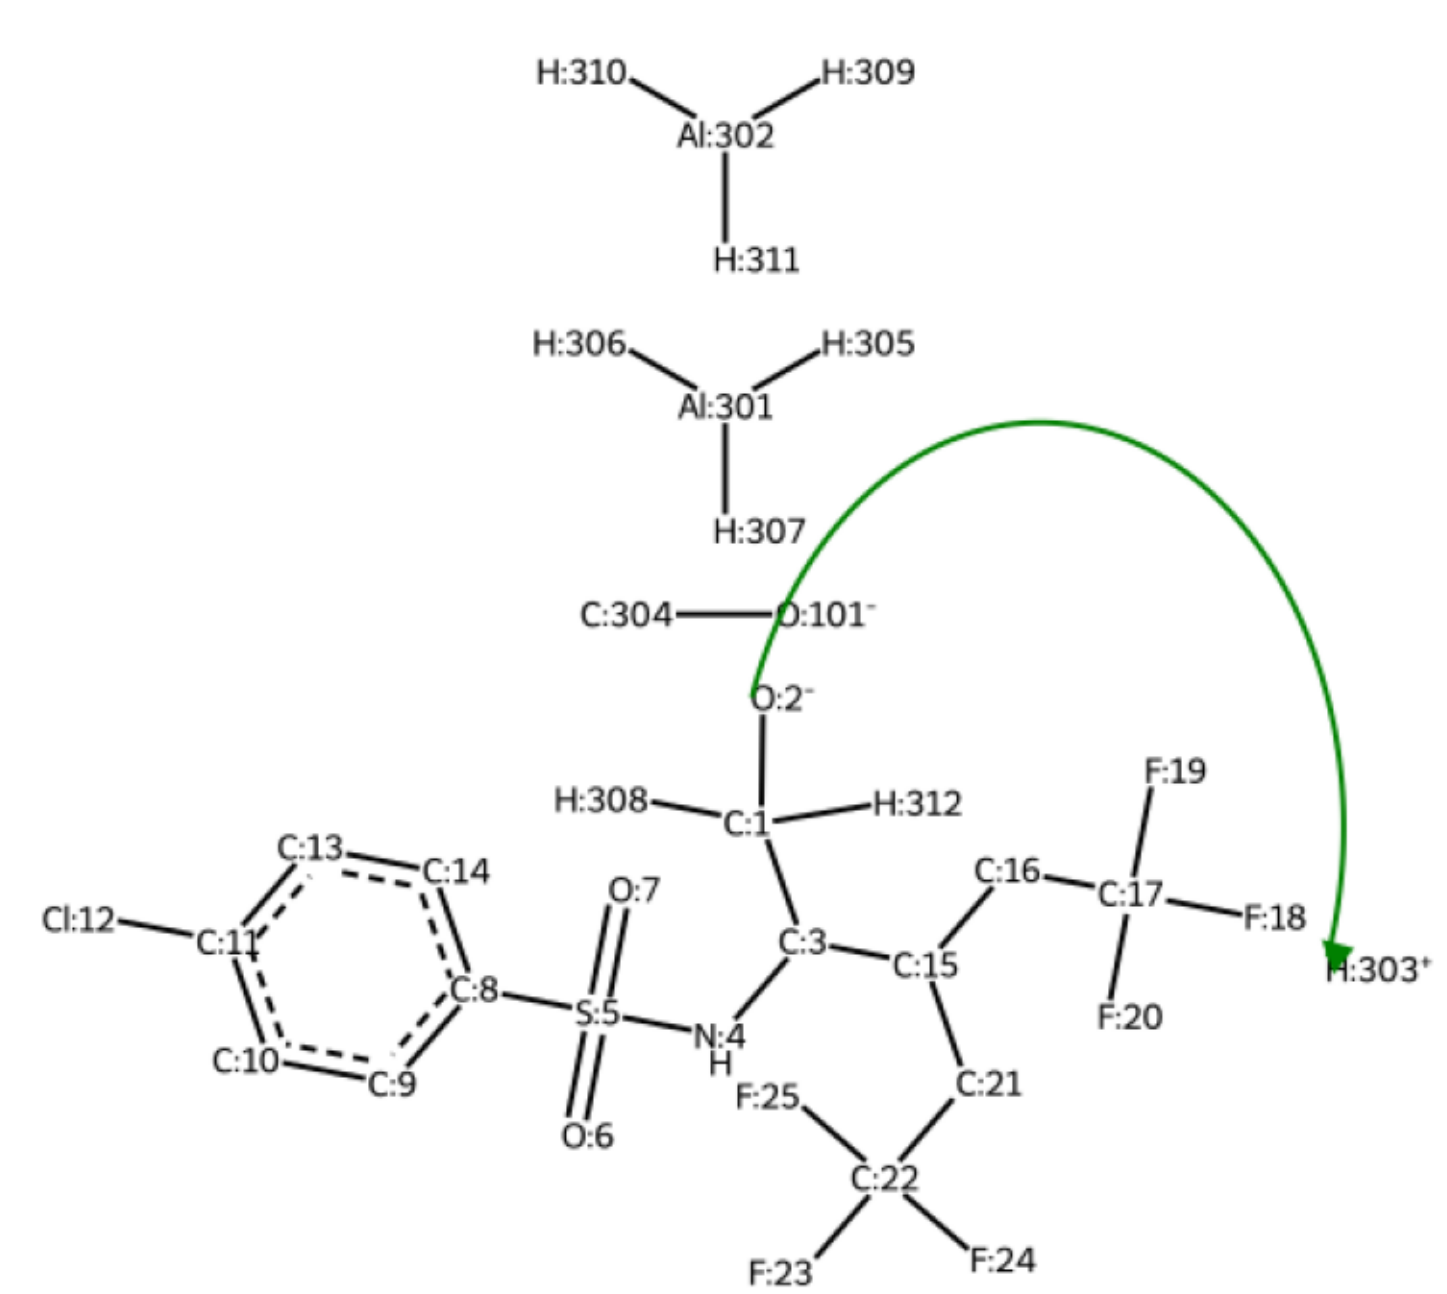

Product(s)

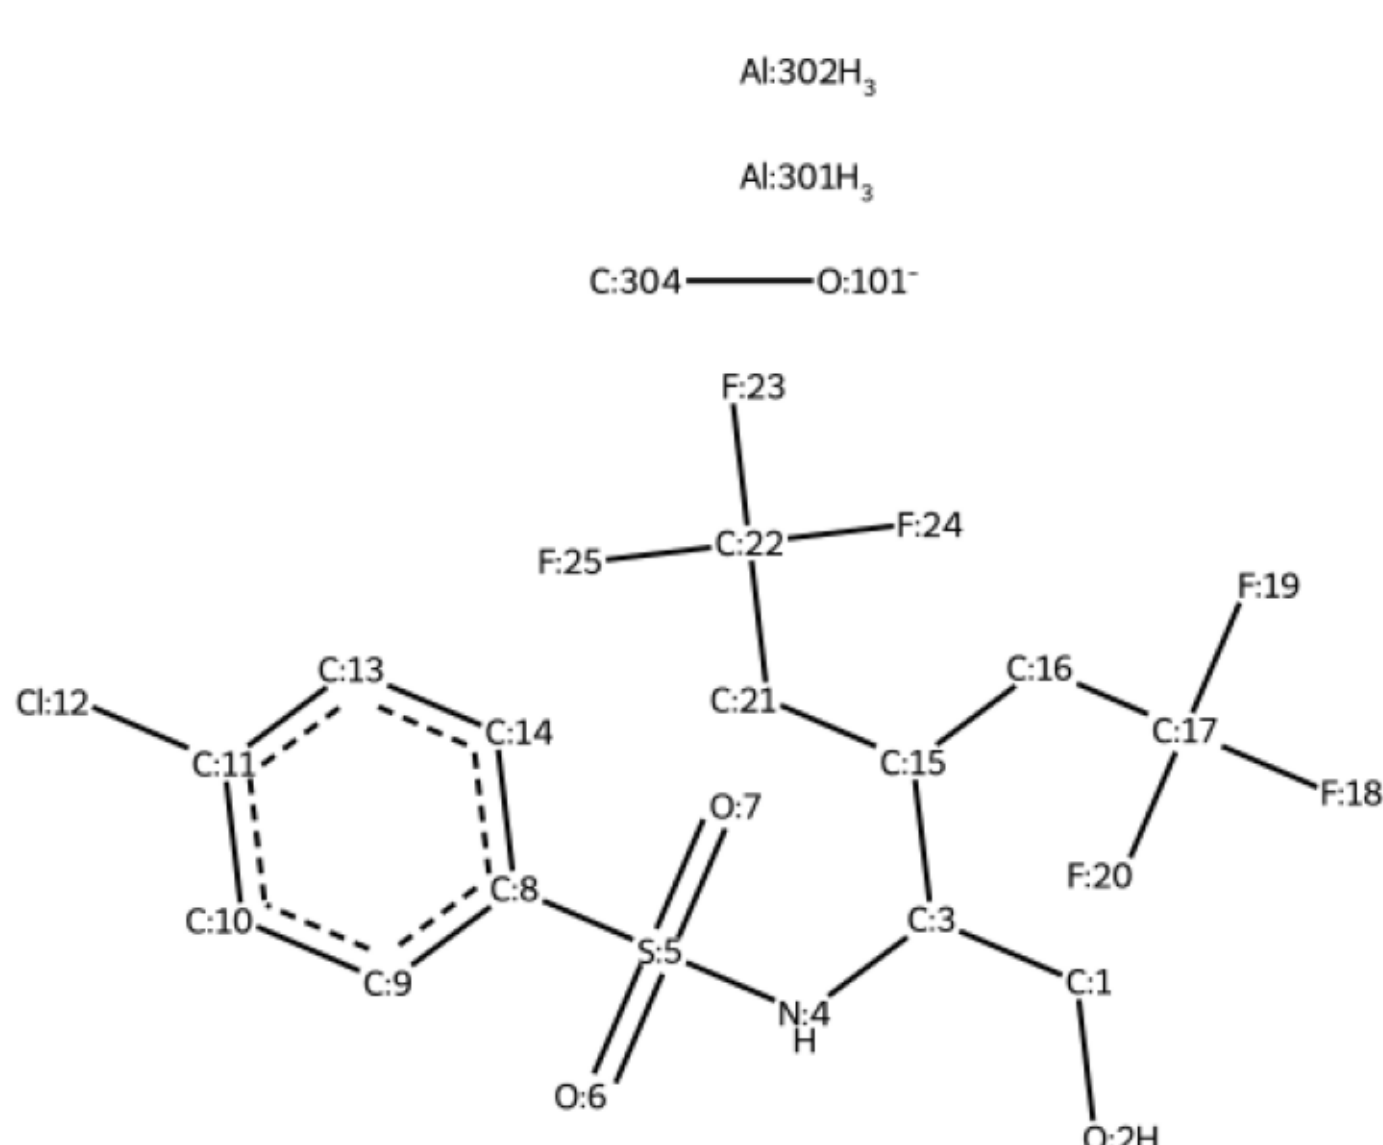



Original reaction  
sampled RXN\_ID:53)

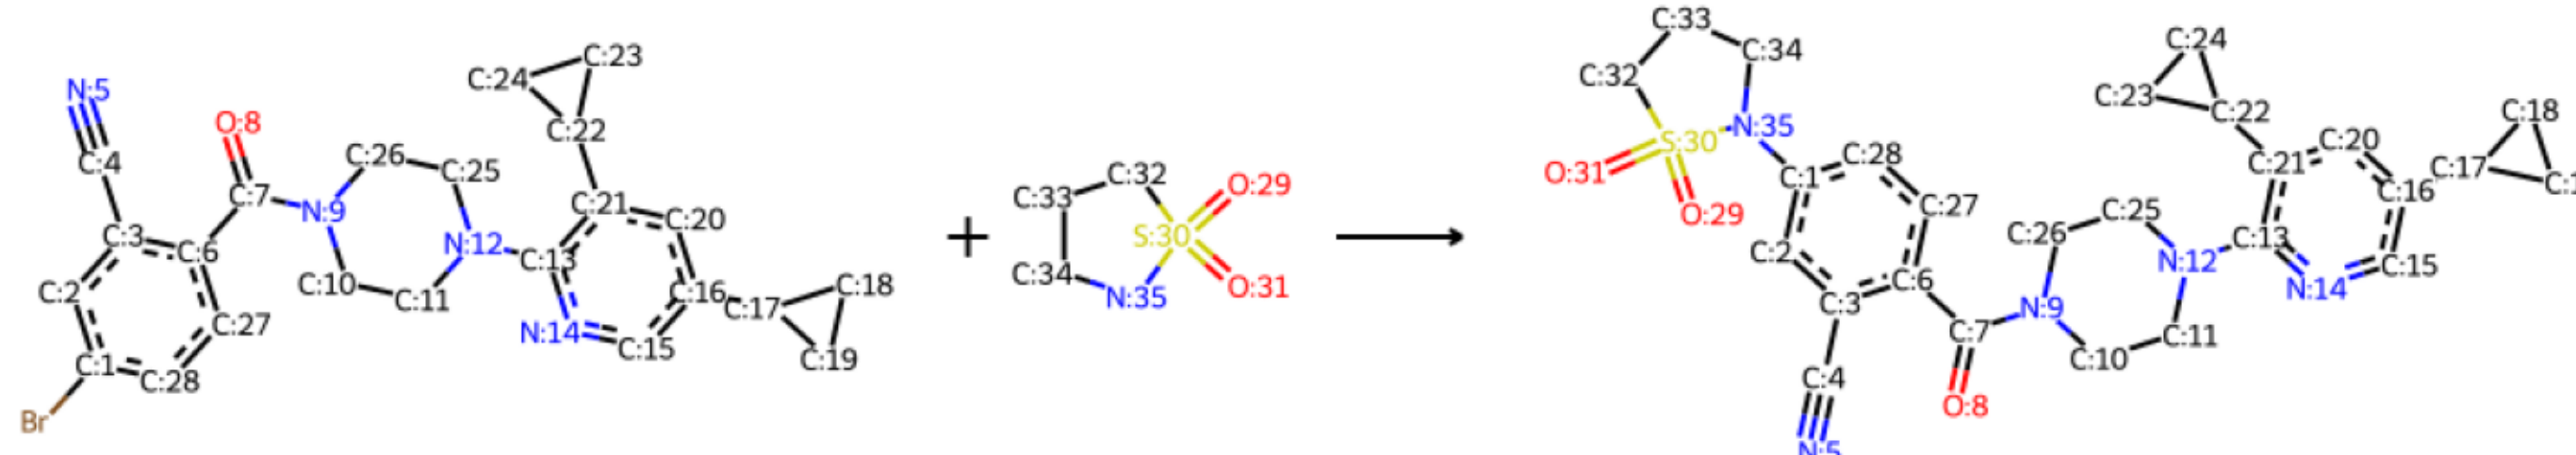

Identified mechanistic class -  
S<sub>N</sub>Ar(para) reaction

Reaction with missing reagents recovered

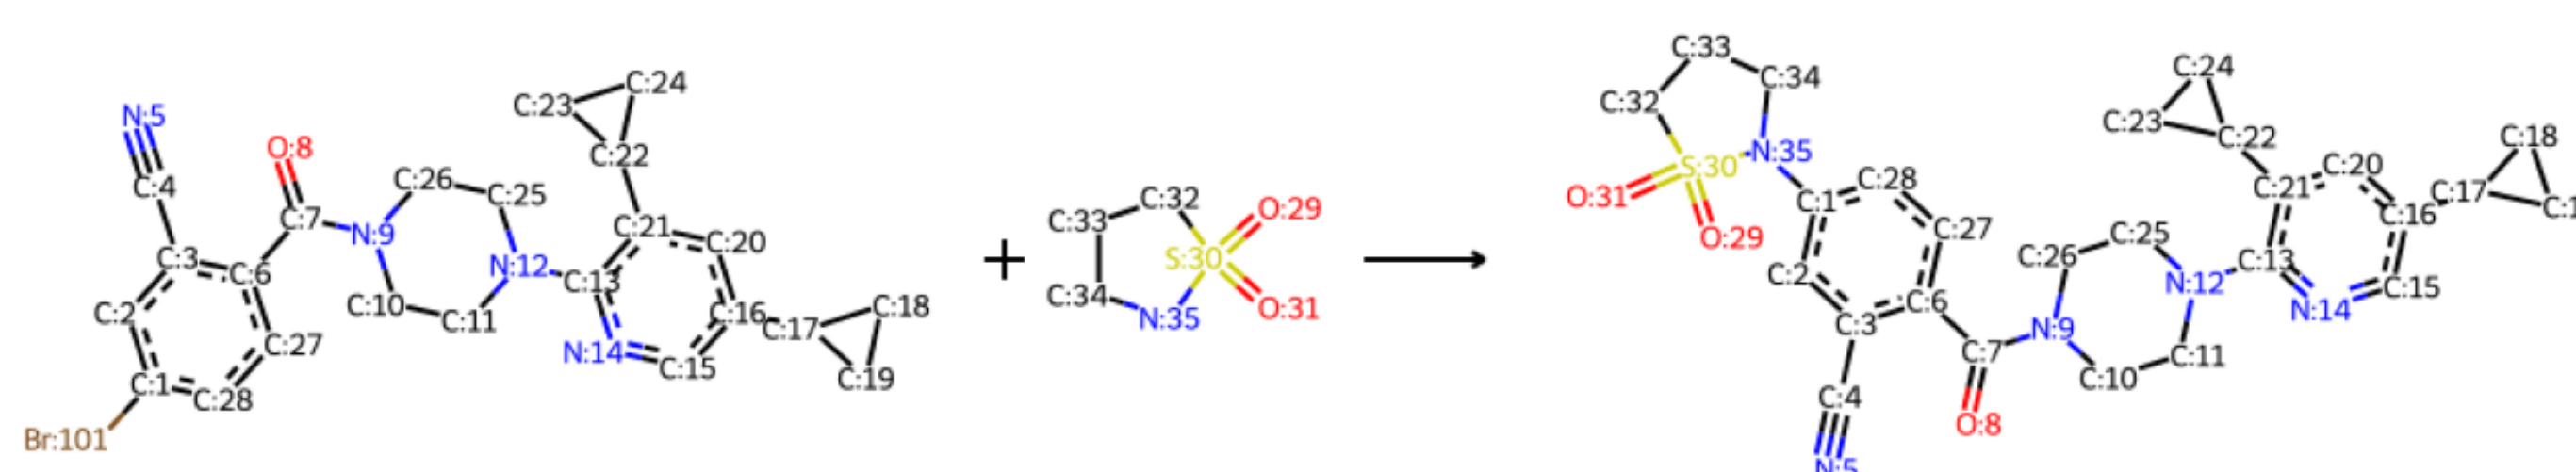

Proposed mechanistic pathway

[Arrow order: (1) green, (2) blue, (3) red, (4) orange]

step #1

step #2

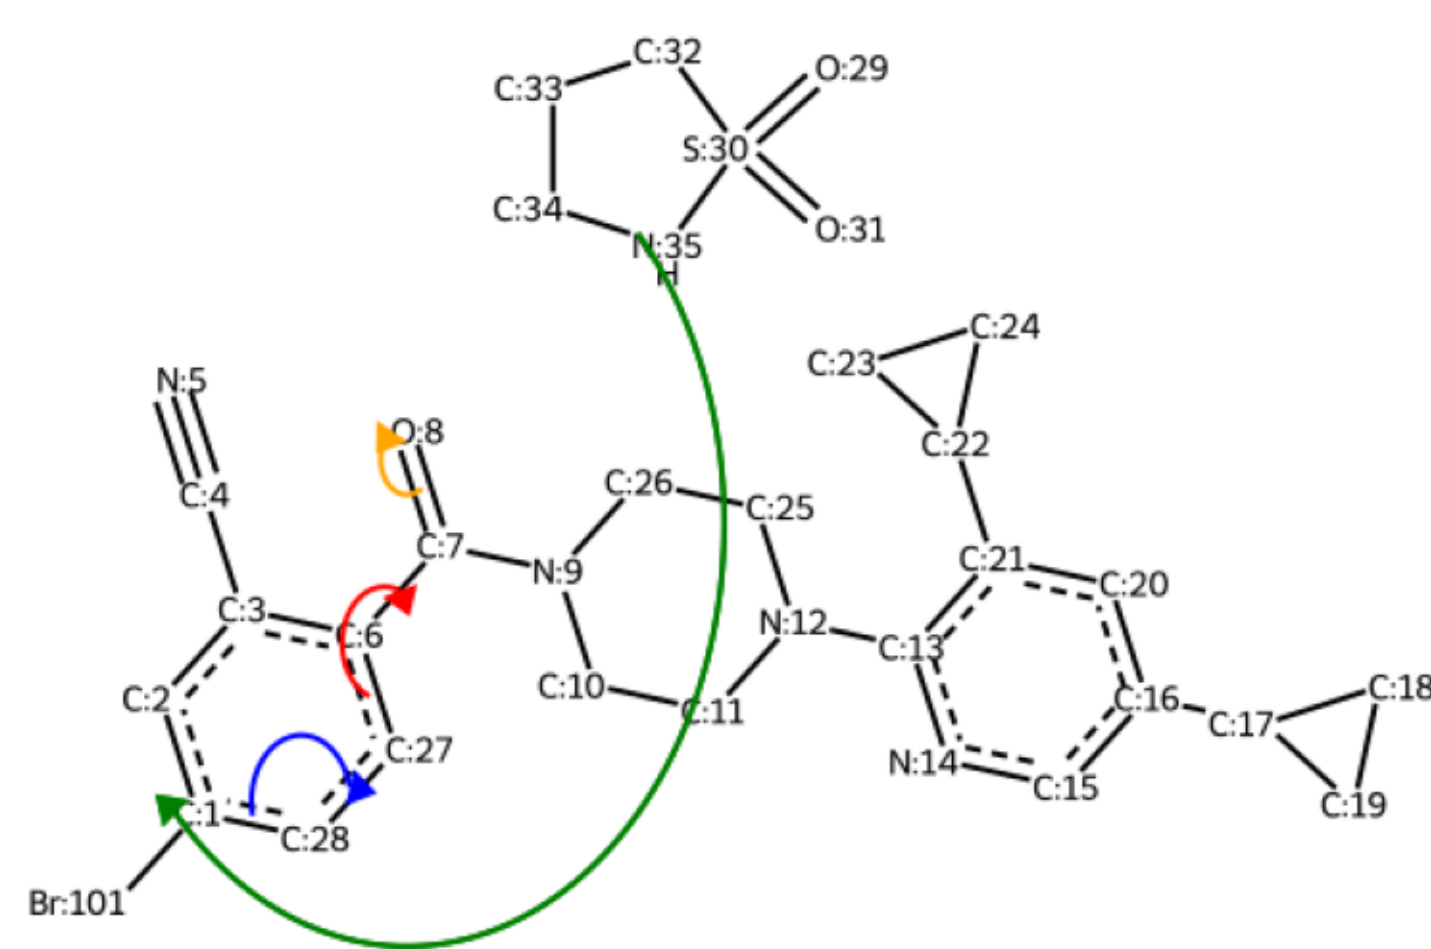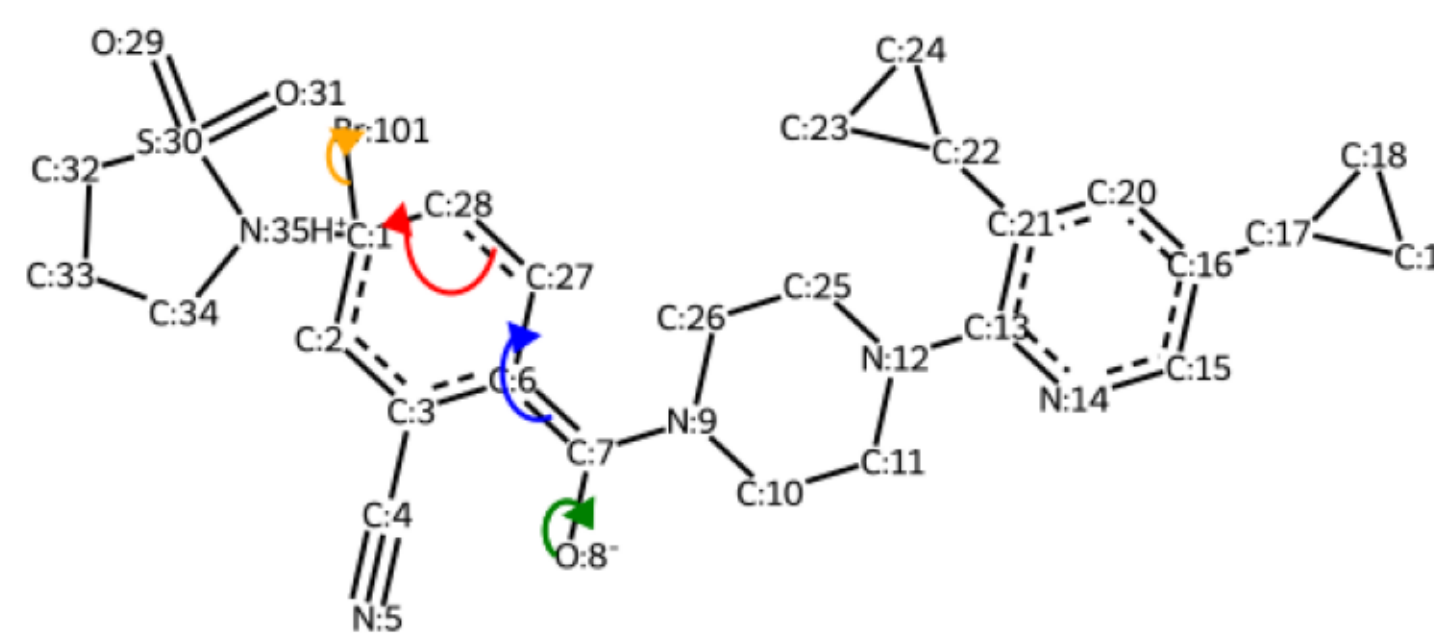

Product(s)

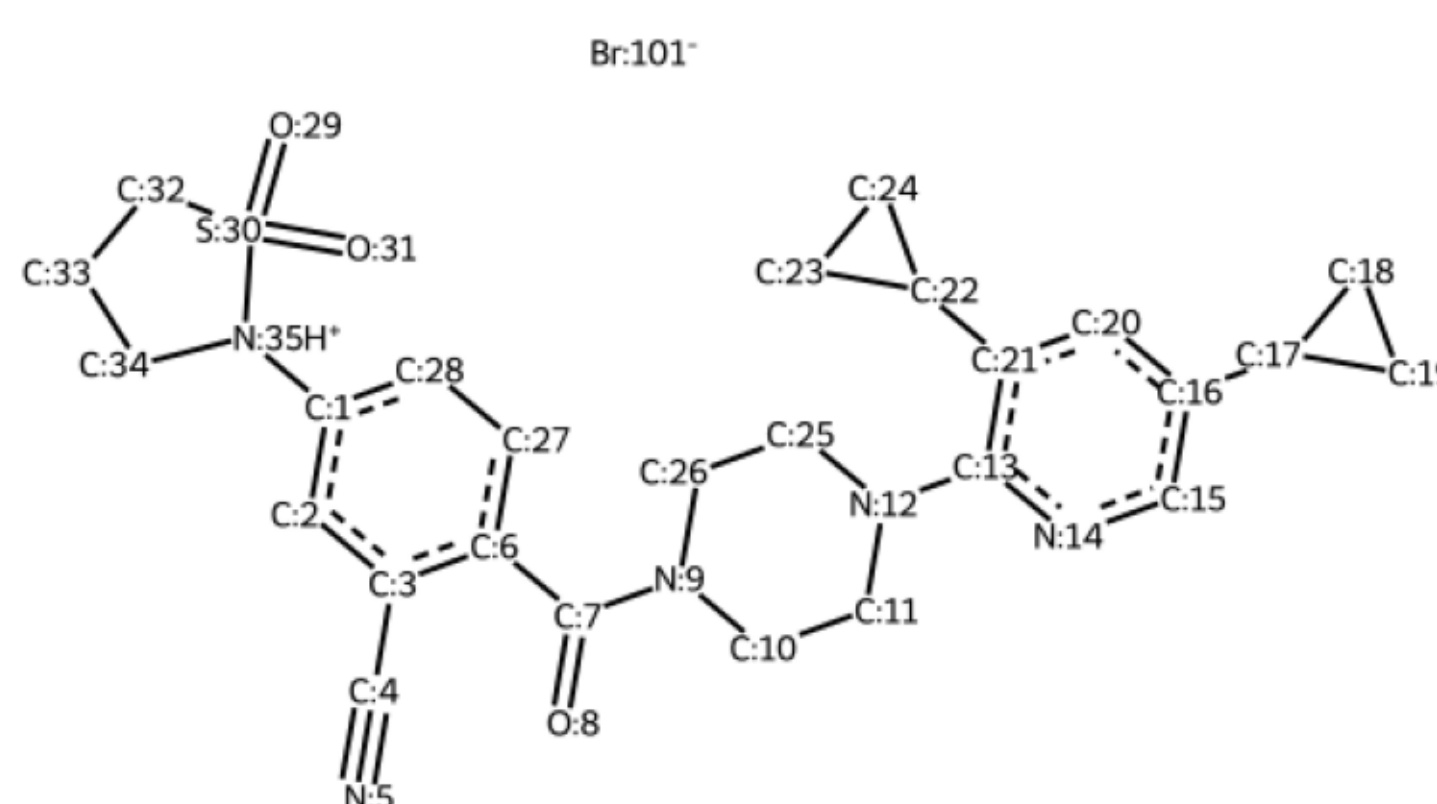

proton transfer

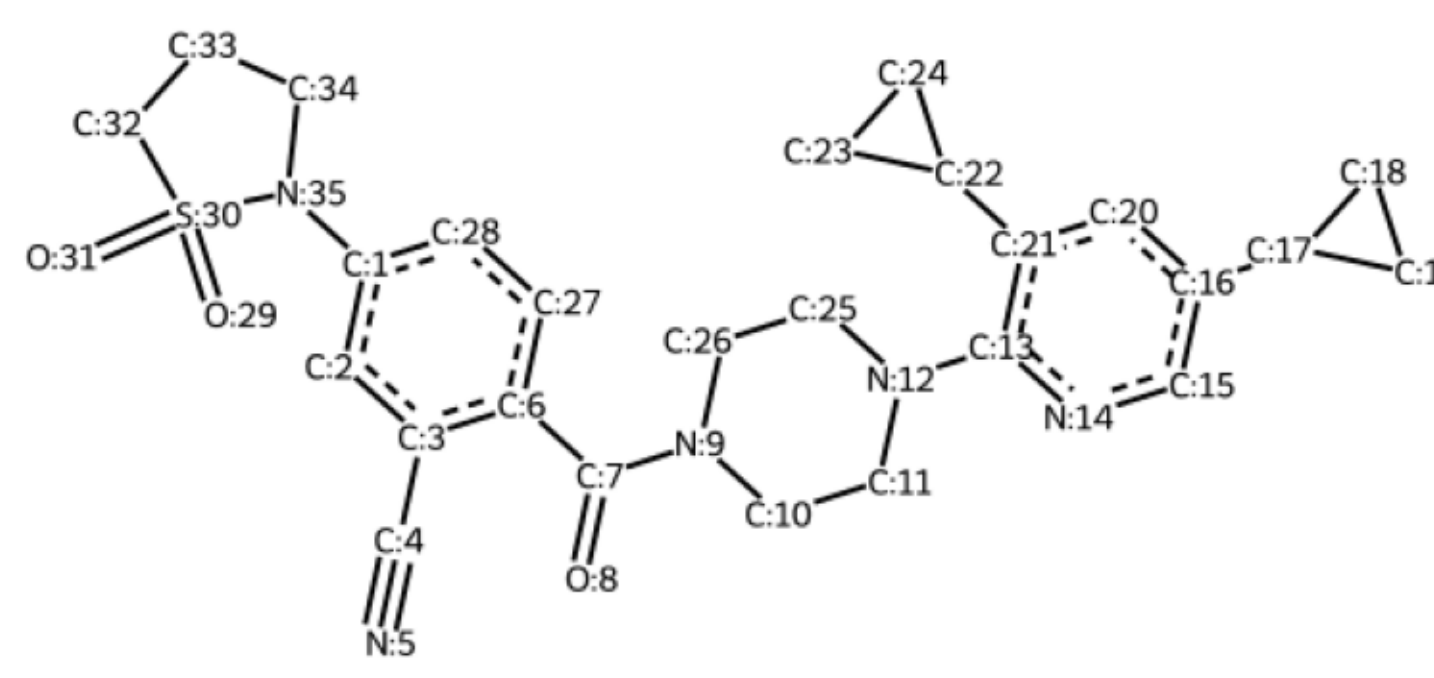



Original reaction  
sampled RXN\_ID:54)

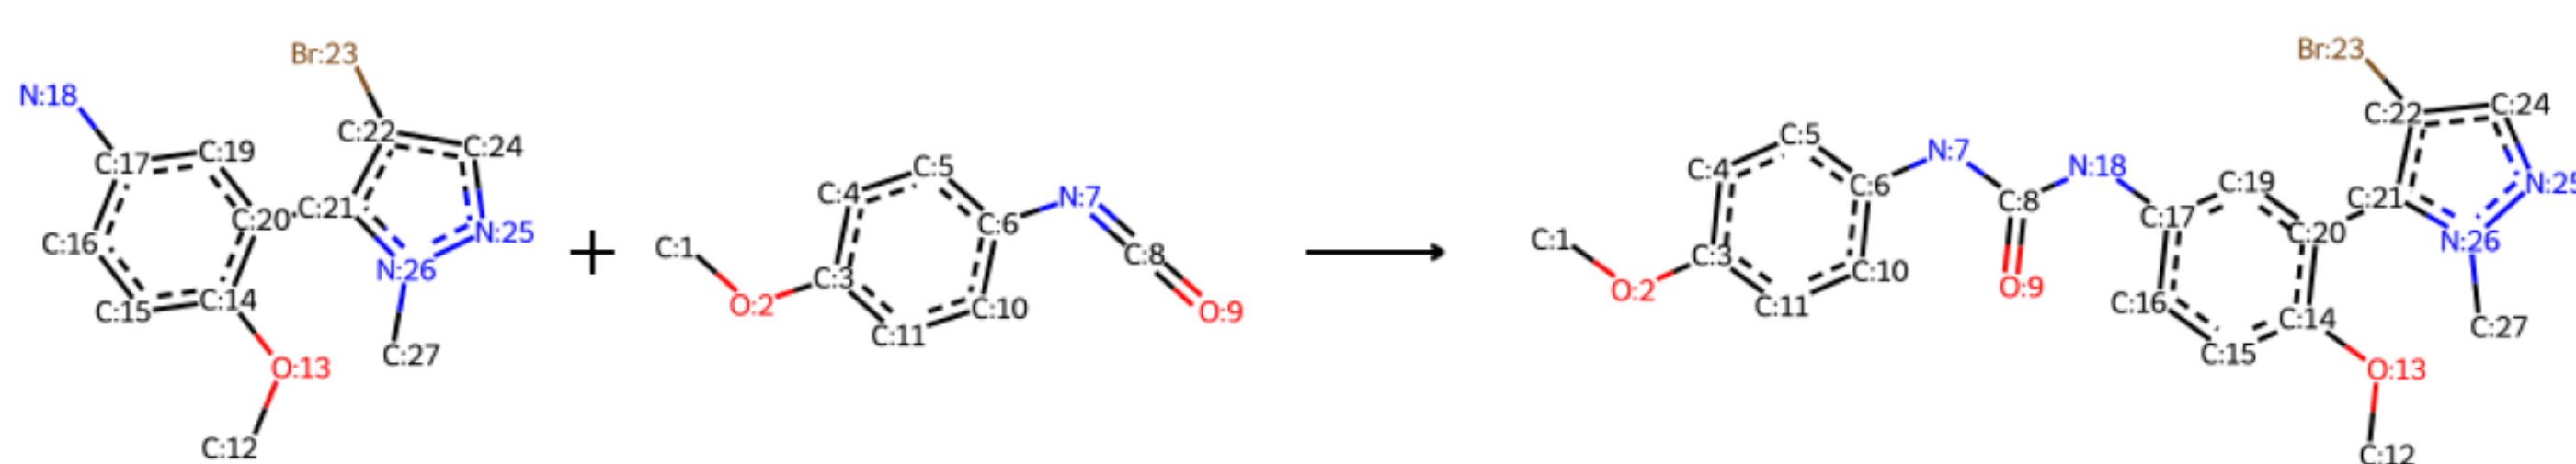

Identified mechanistic class -  
nucleophilic\_attack\_to\_iso(thio)cyanate reaction

Reaction with missing reagents recovered

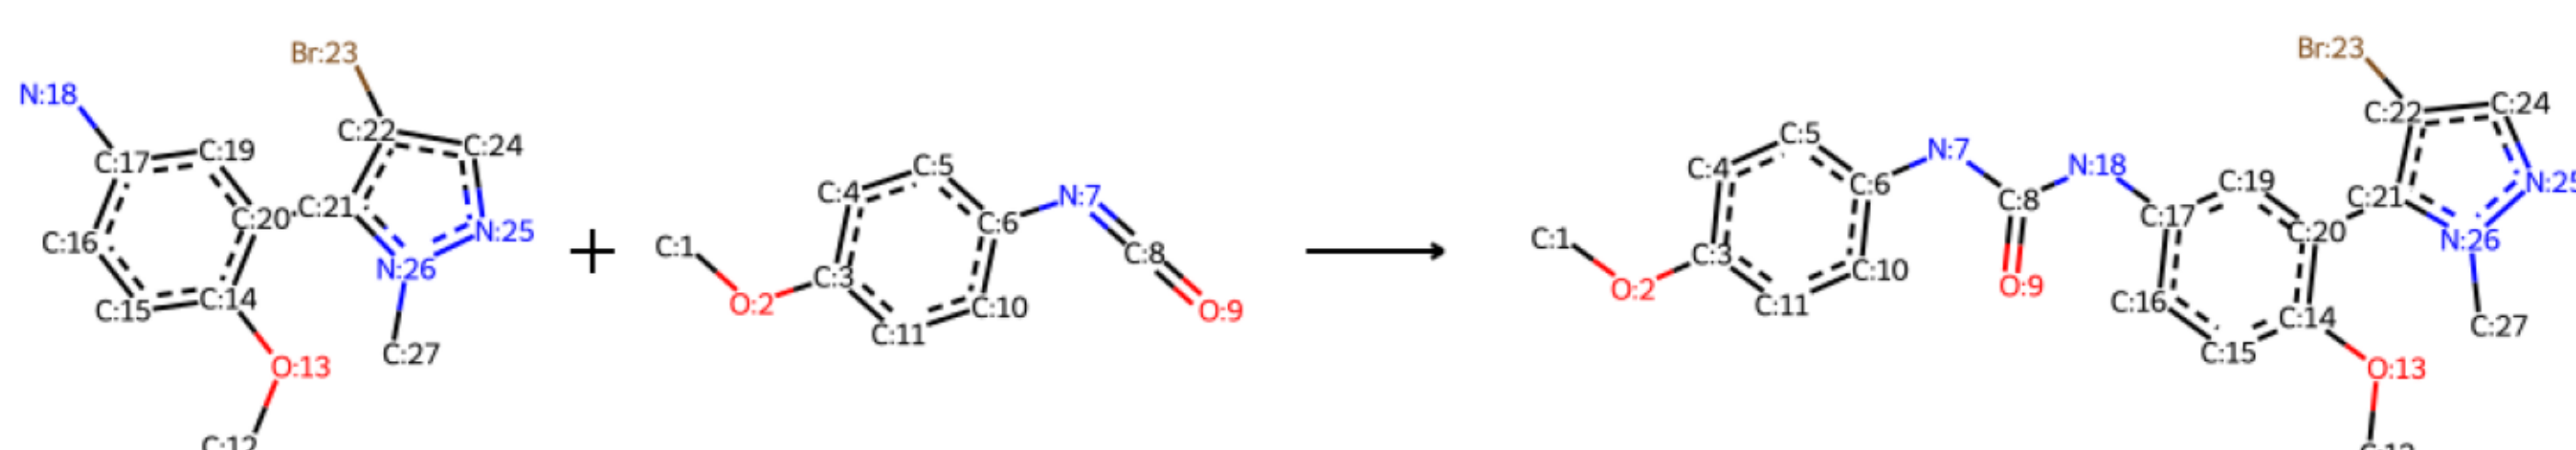

Proposed mechanistic pathway

[Arrow order: (1) green, (2) blue, (3) red, (4) orange]

step #1

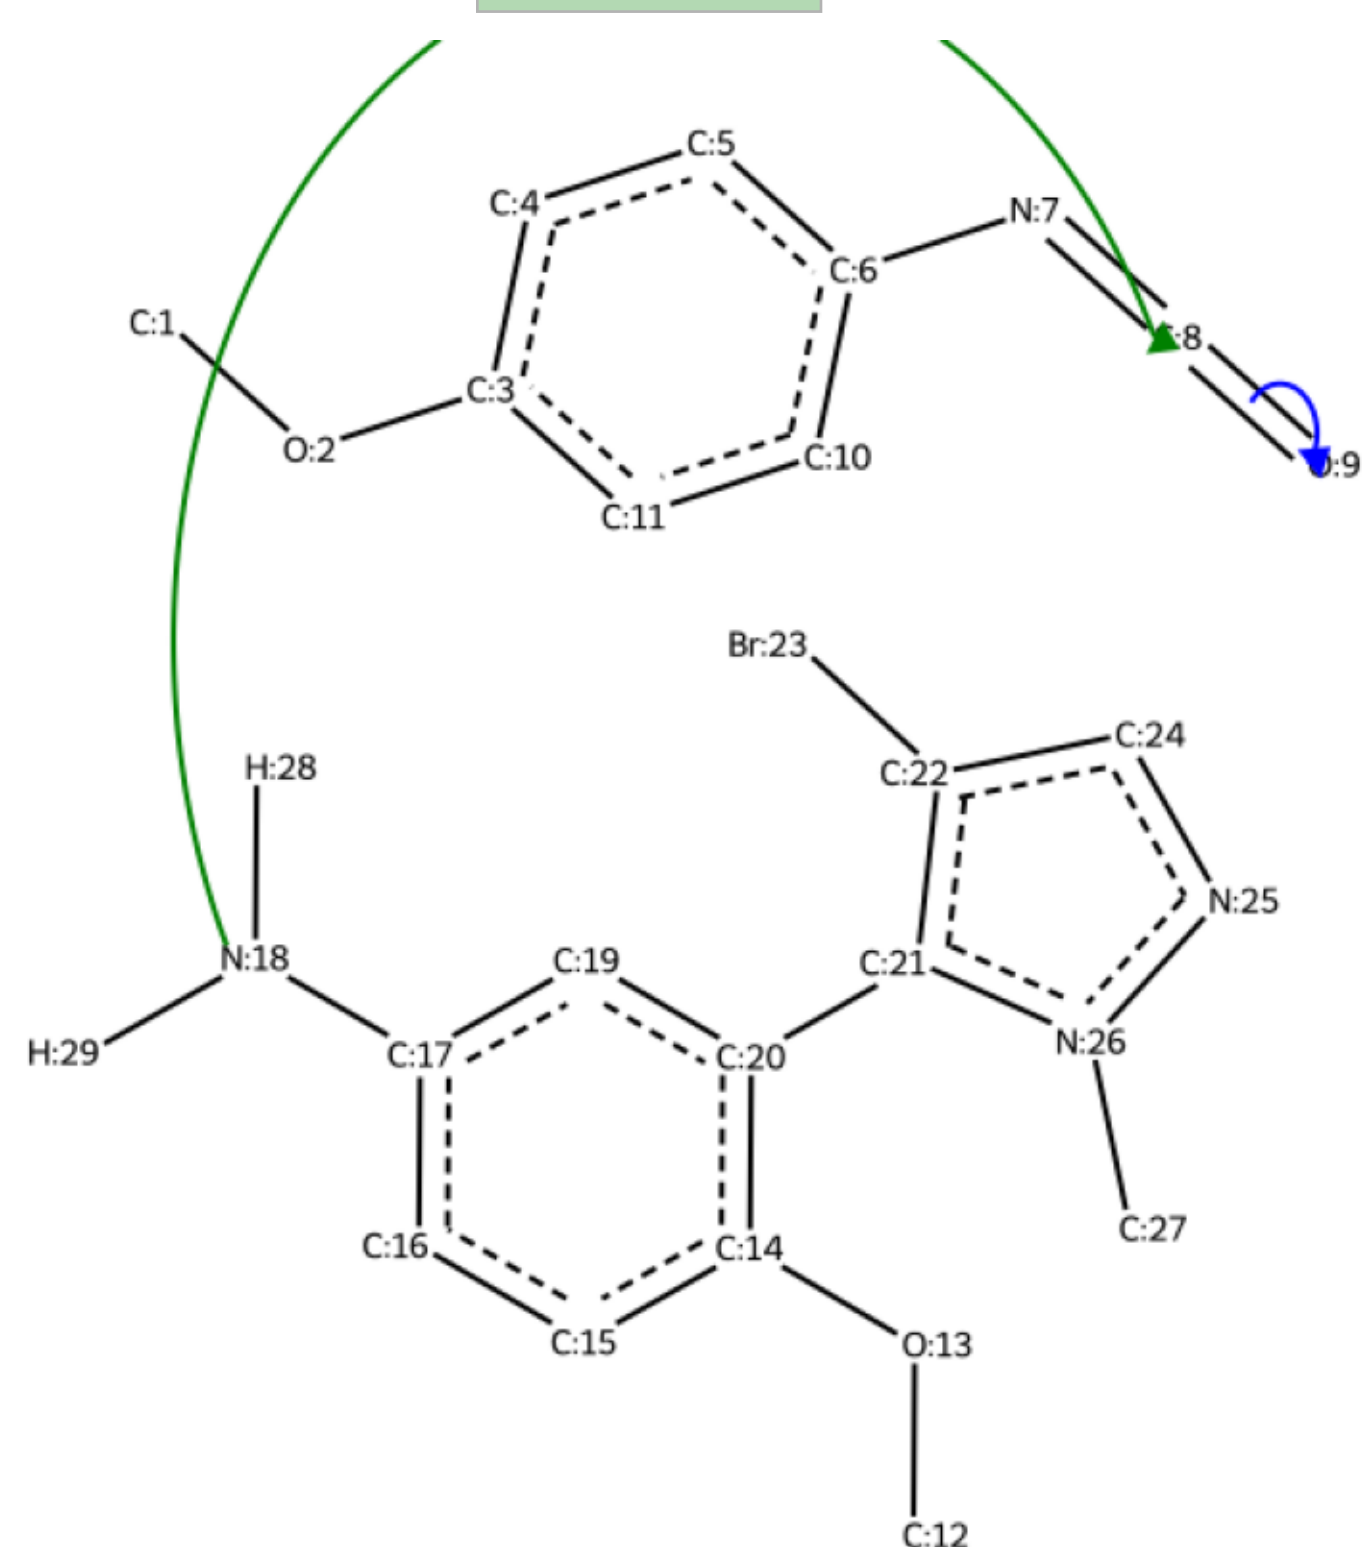

step #2

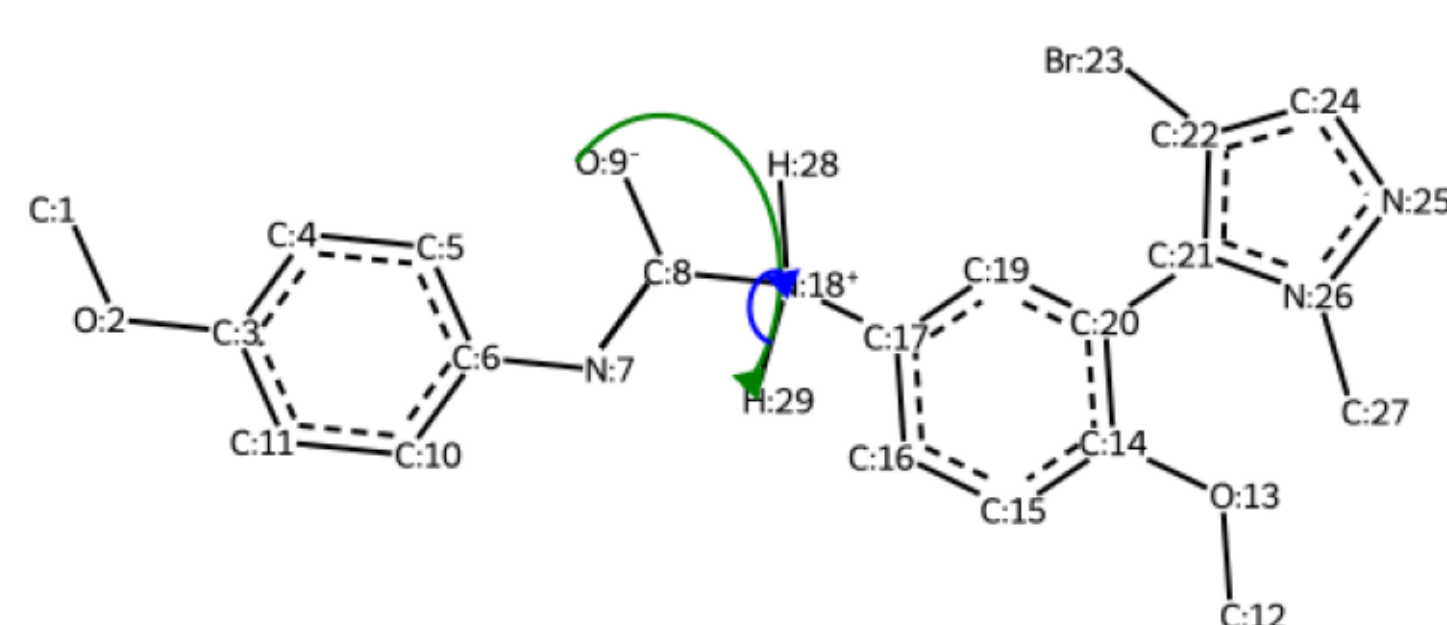

step #3

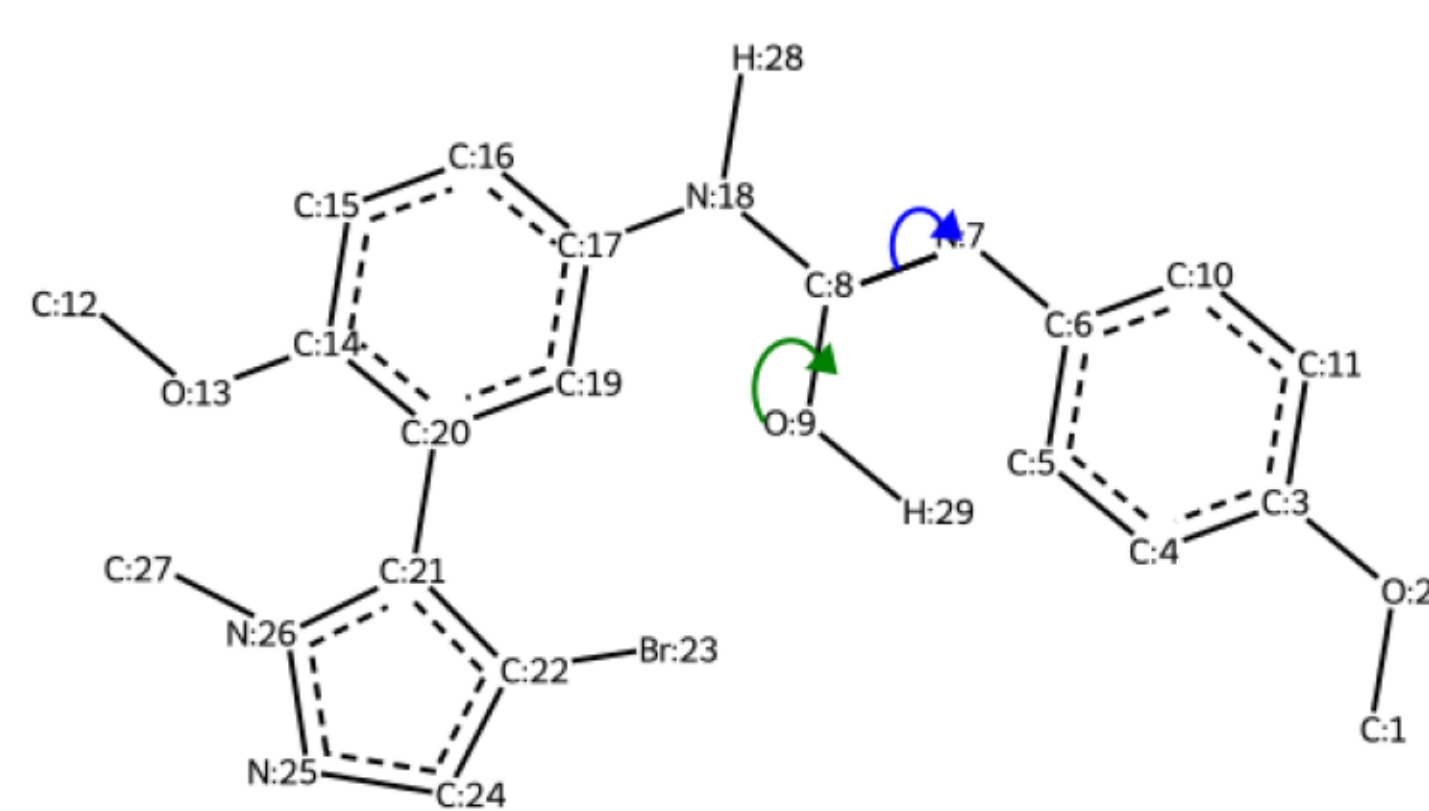

step #4

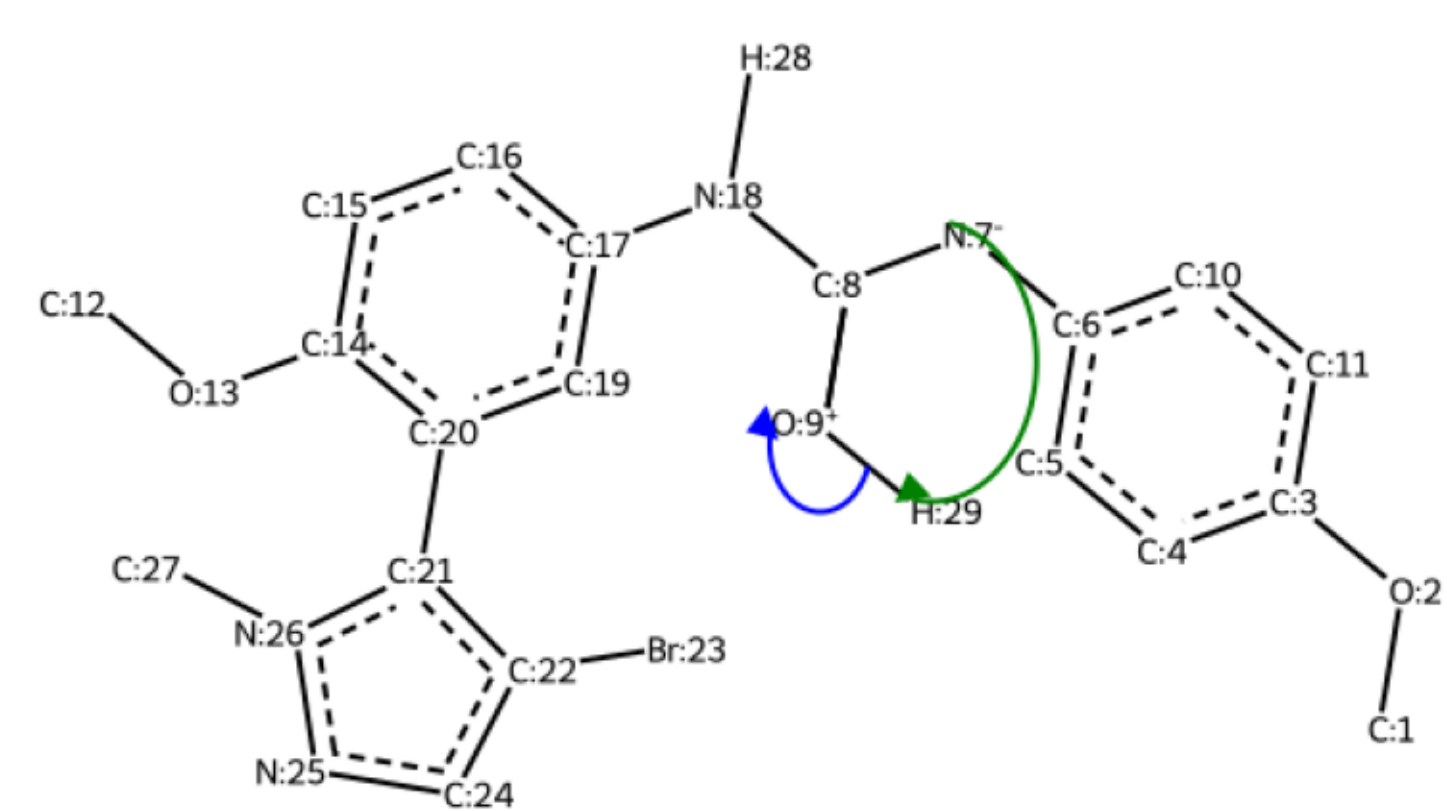

Product(s)

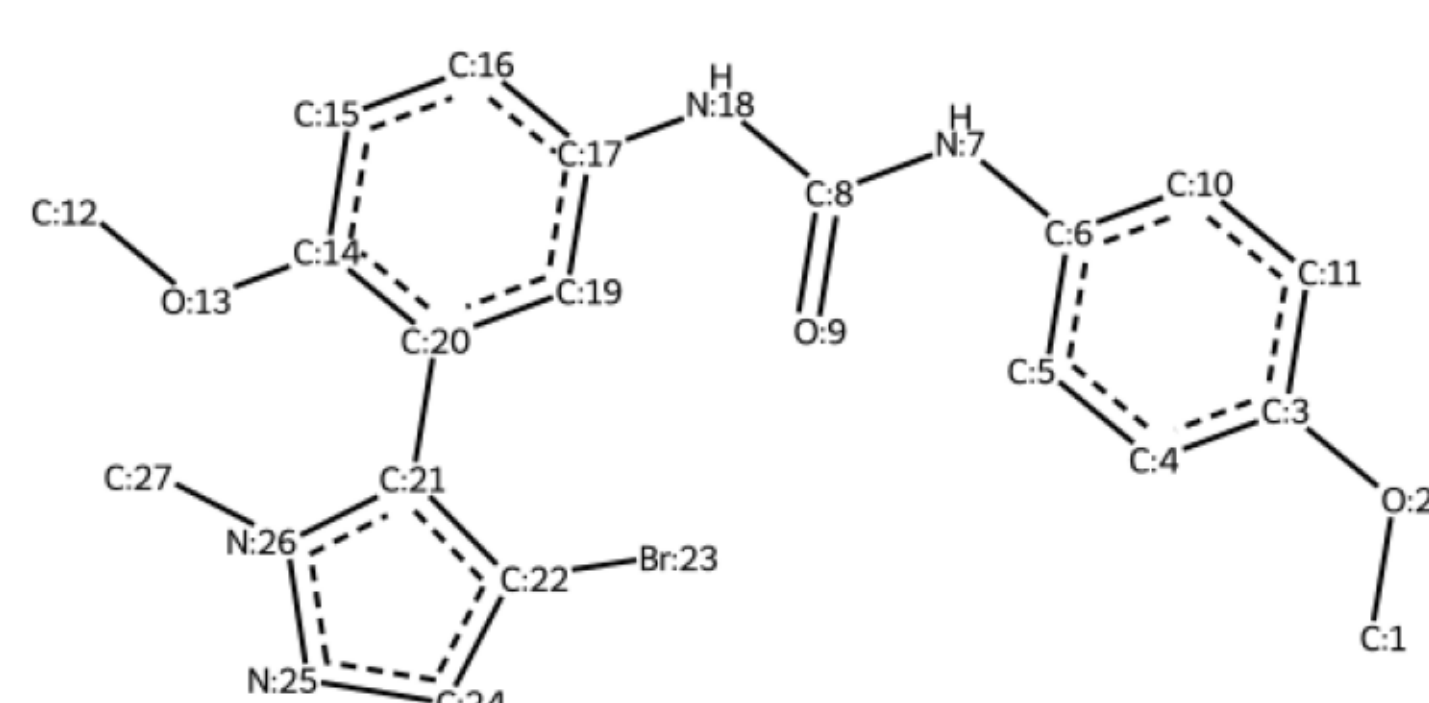



Original reaction  
sampled RXN\_ID:55)

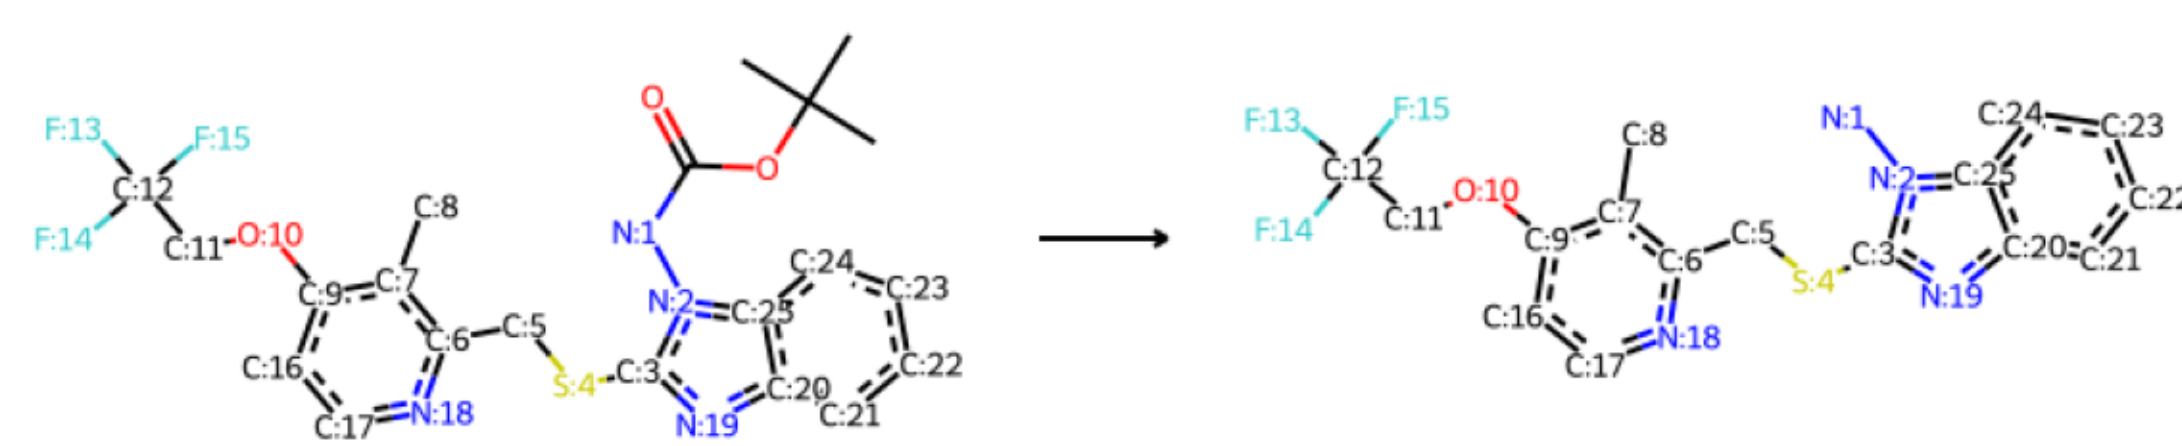

Identified mechanistic class -  
Boc\_deprotection reaction

Reaction with missing reagents recovered

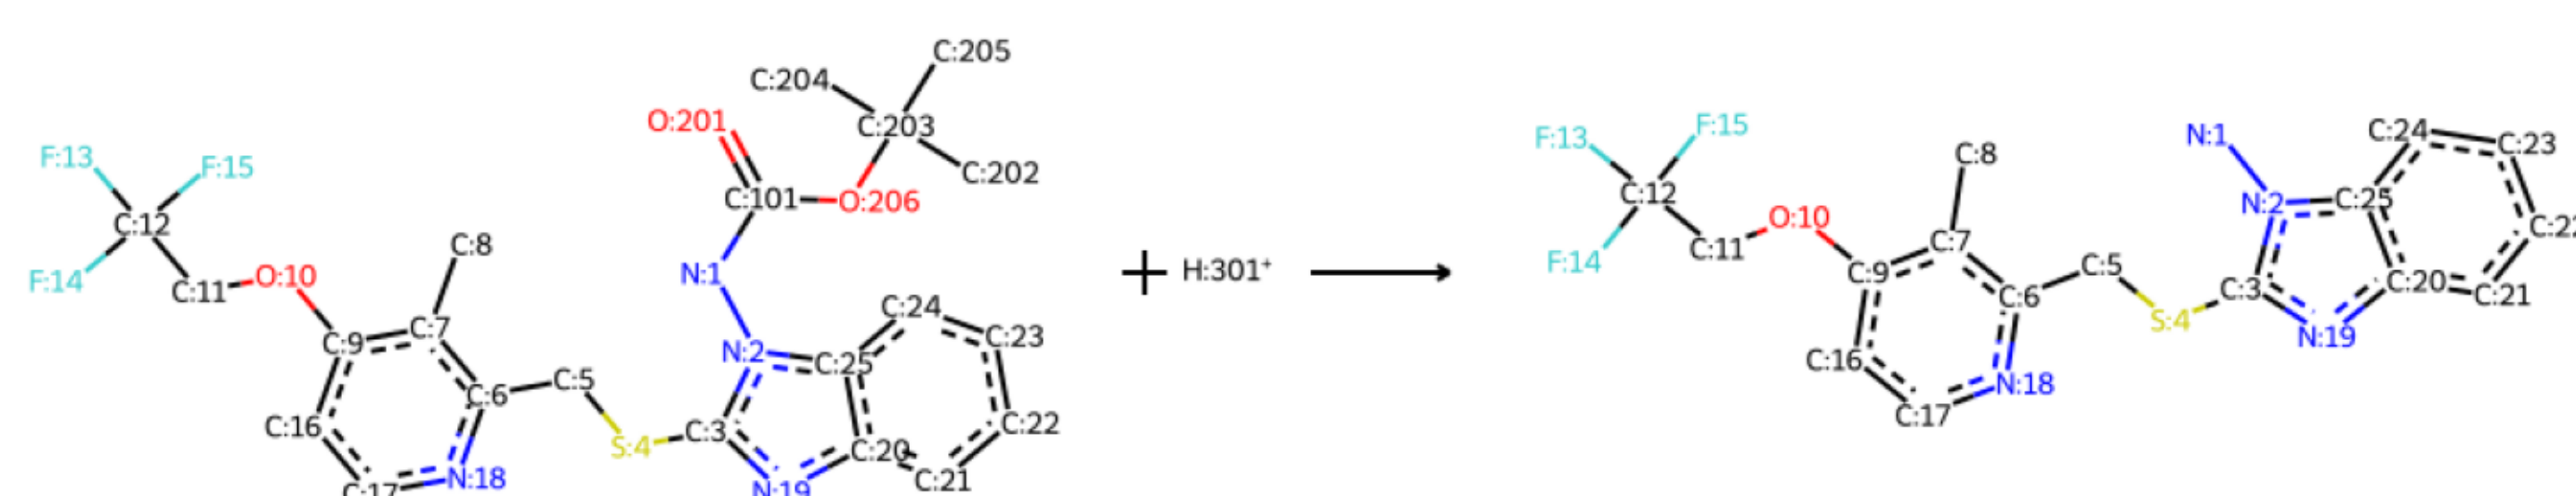

Proposed mechanistic pathway

[Arrow order: (1) green, (2) blue, (3) red, (4) orange]

step #1

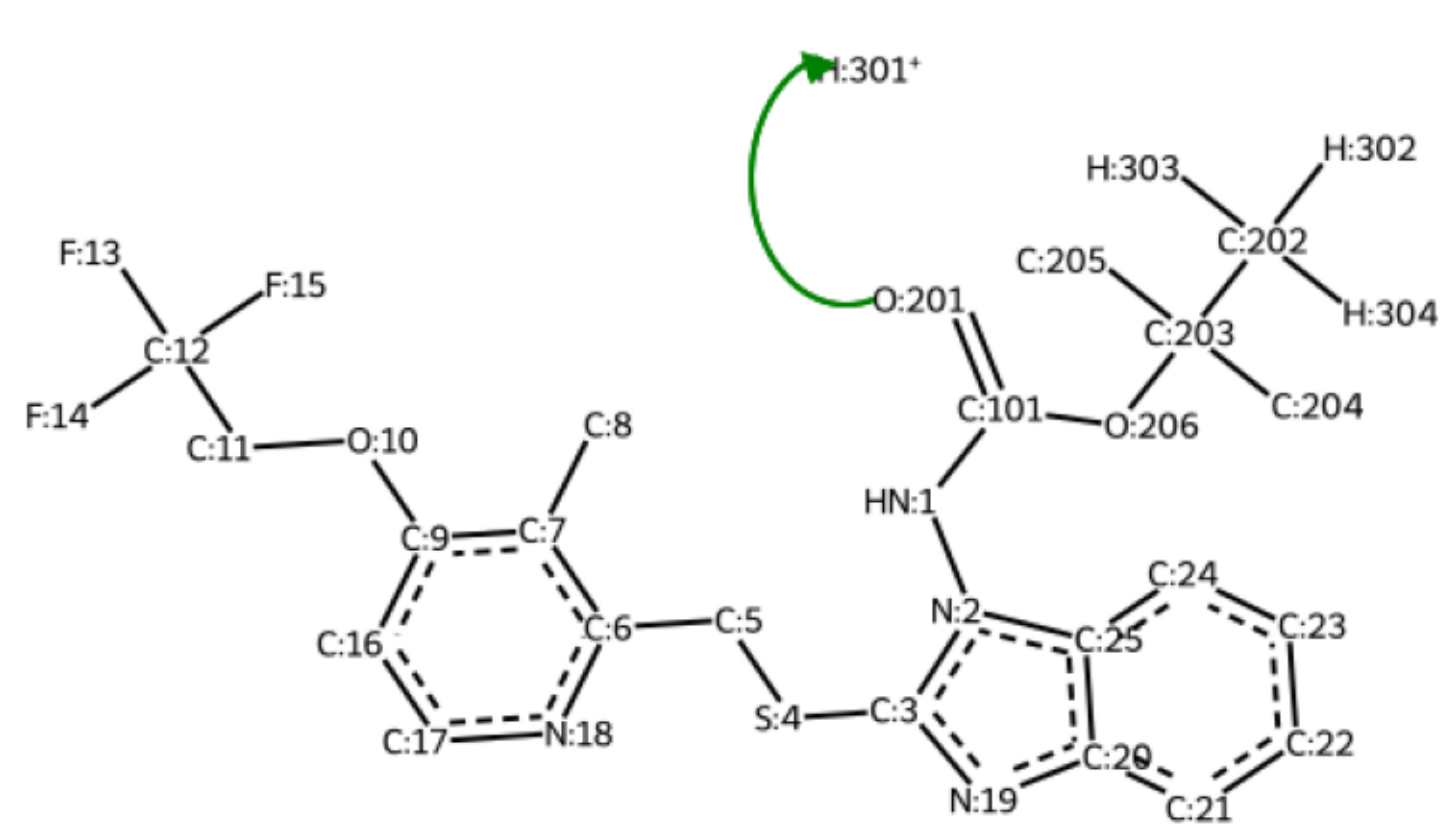

step #2

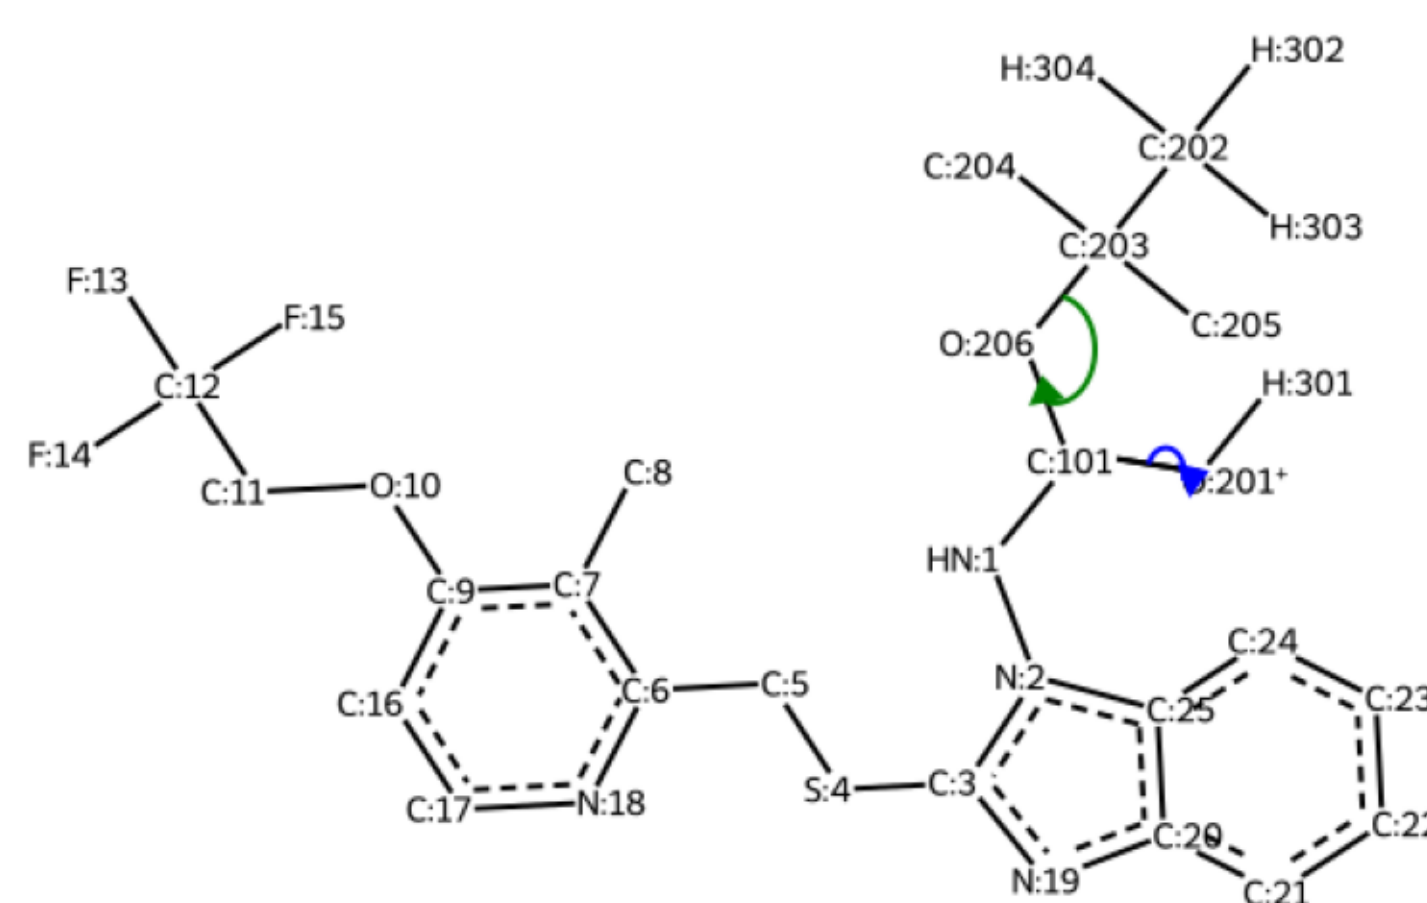

step #3

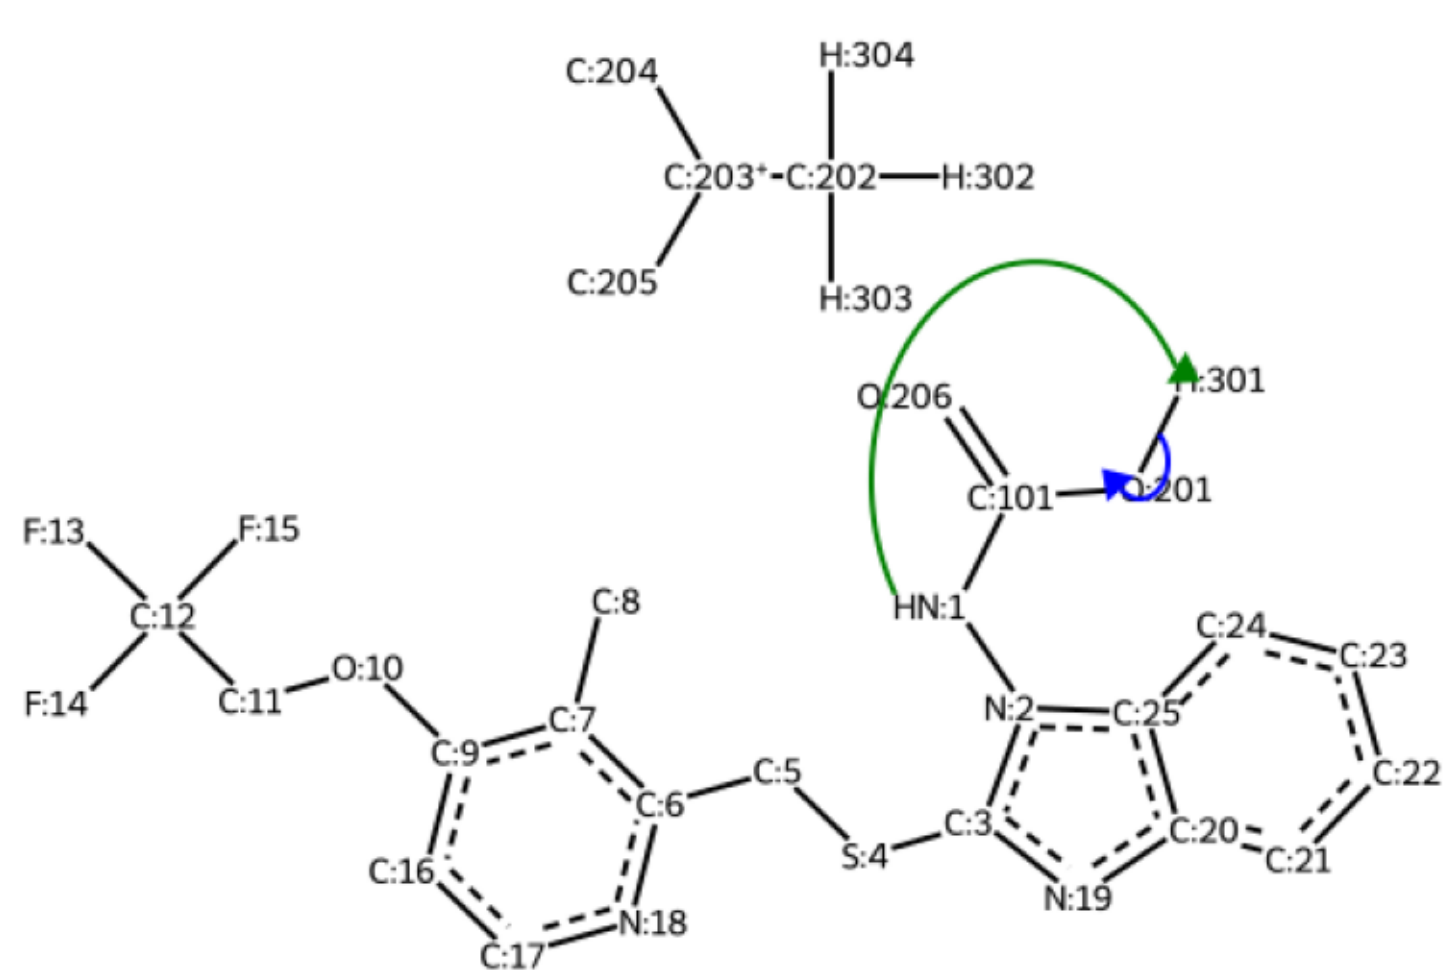

step #4

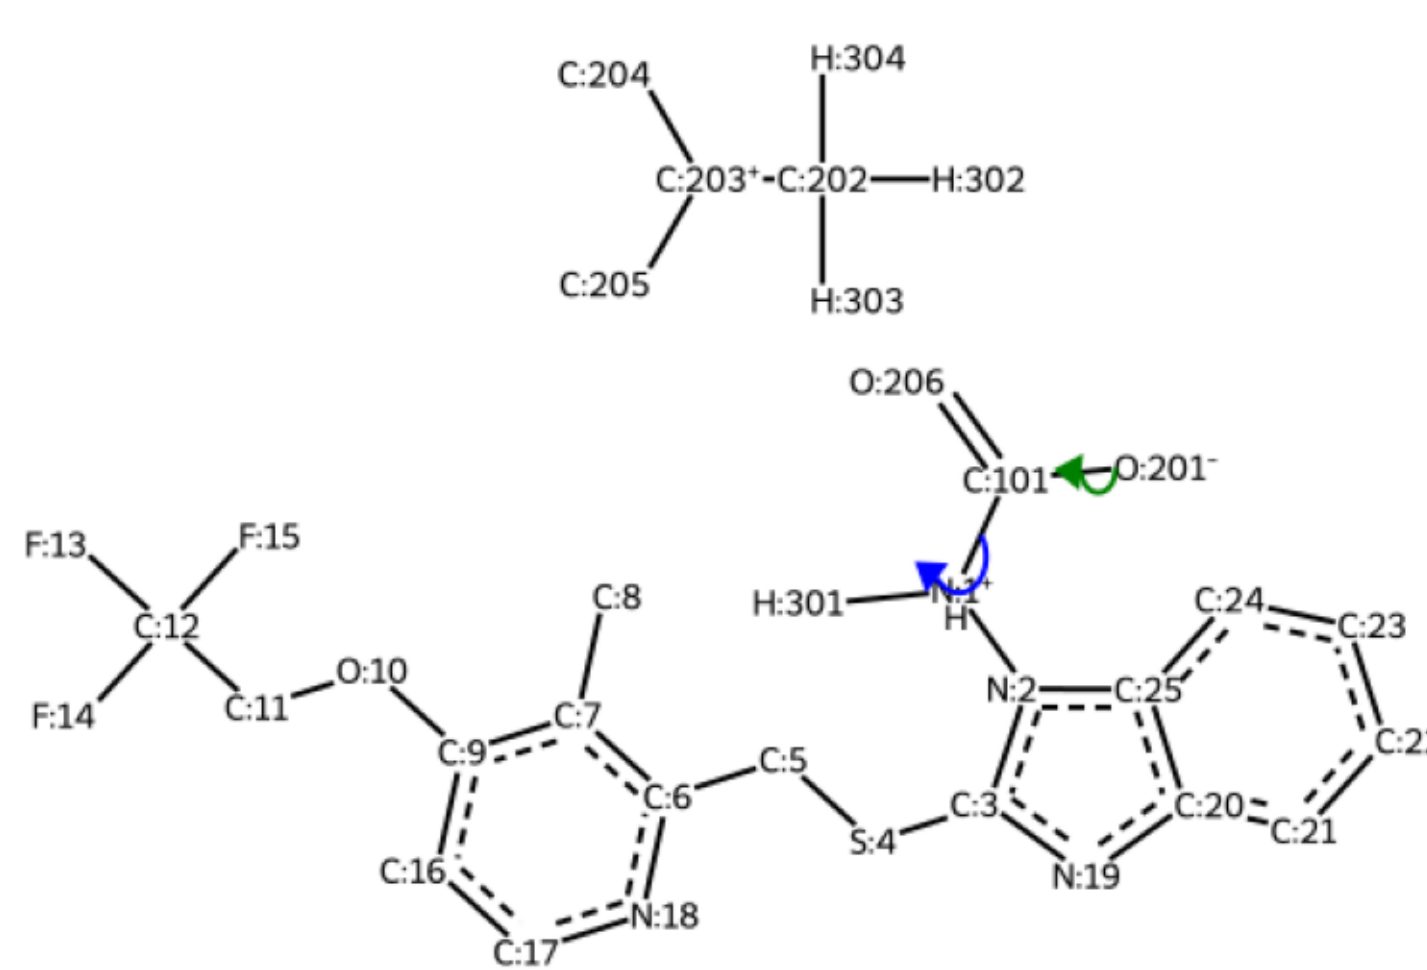

step #5

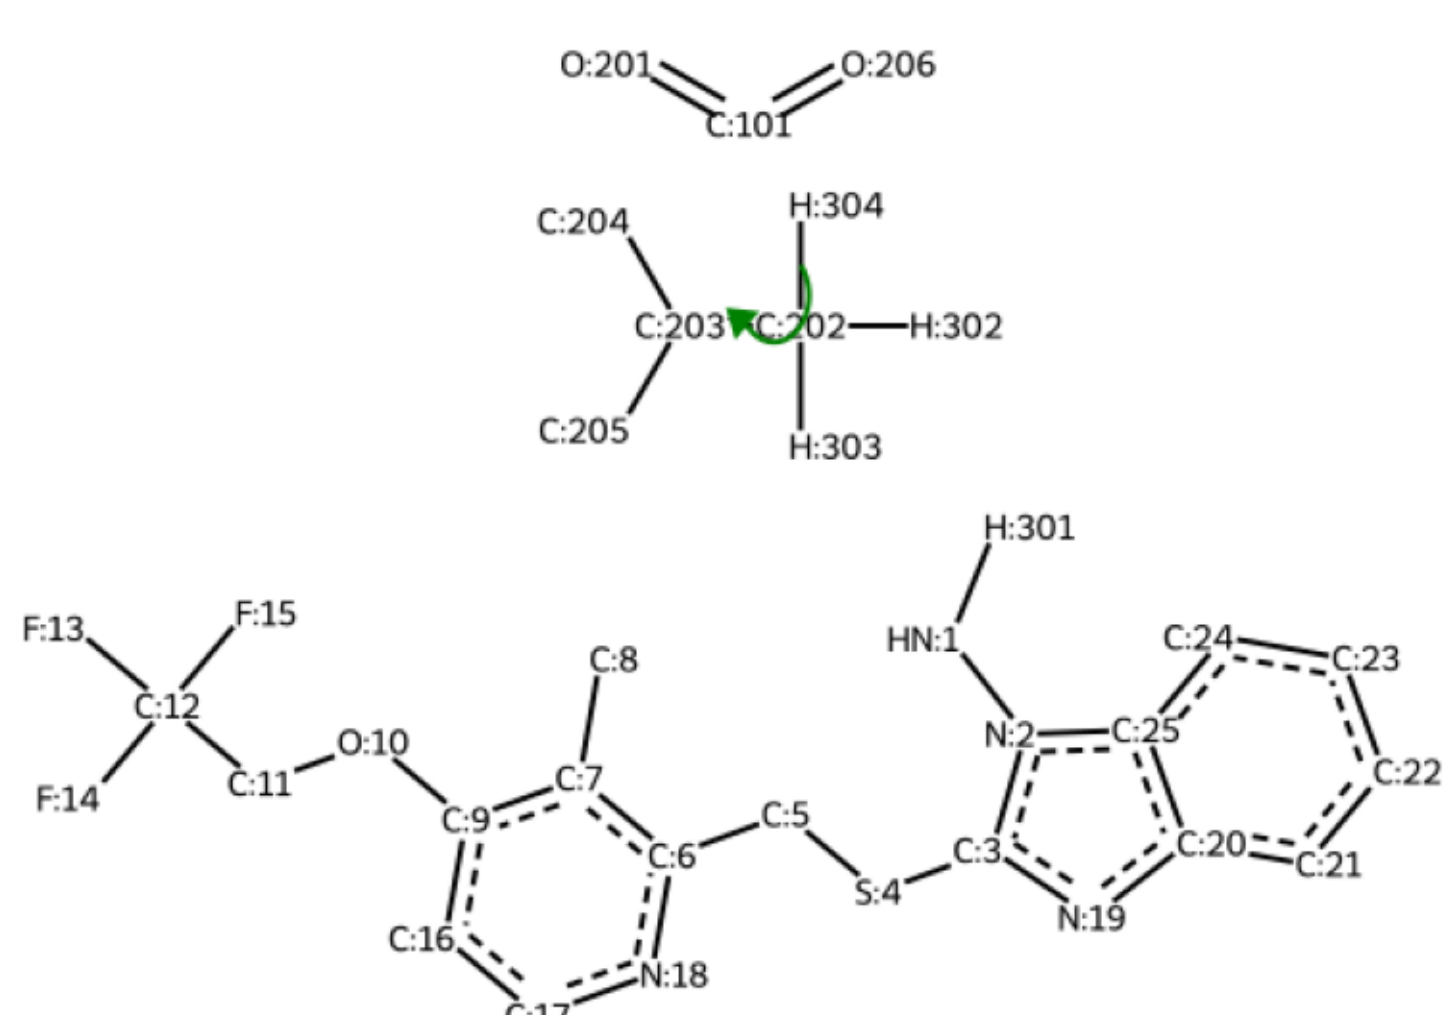

Product(s)

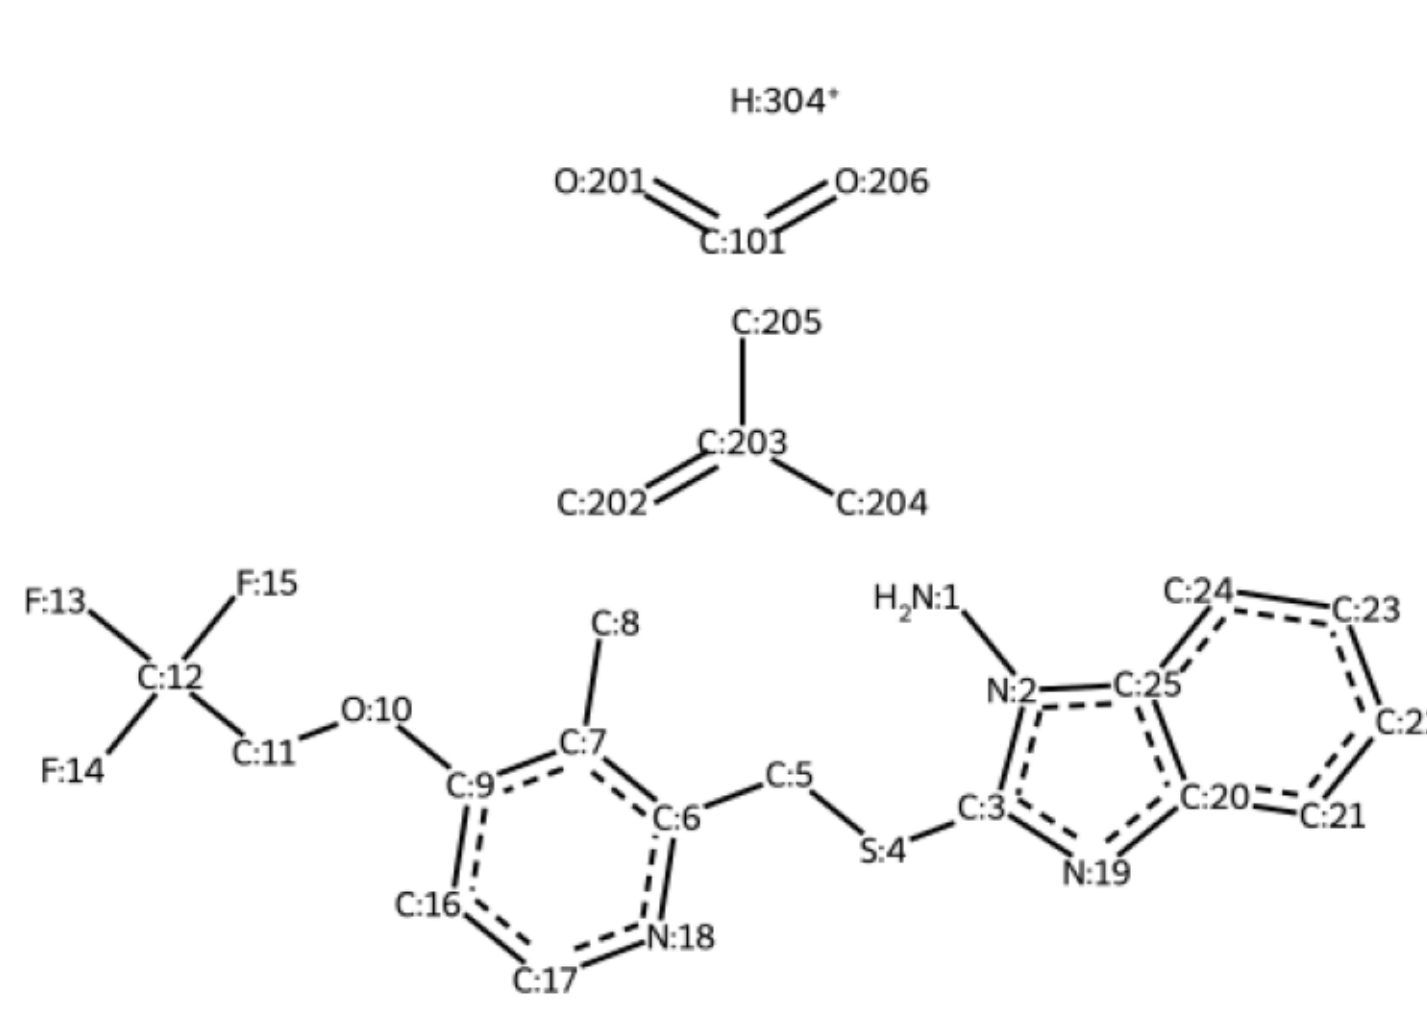



Original reaction  
sampled RXN\_ID:56)

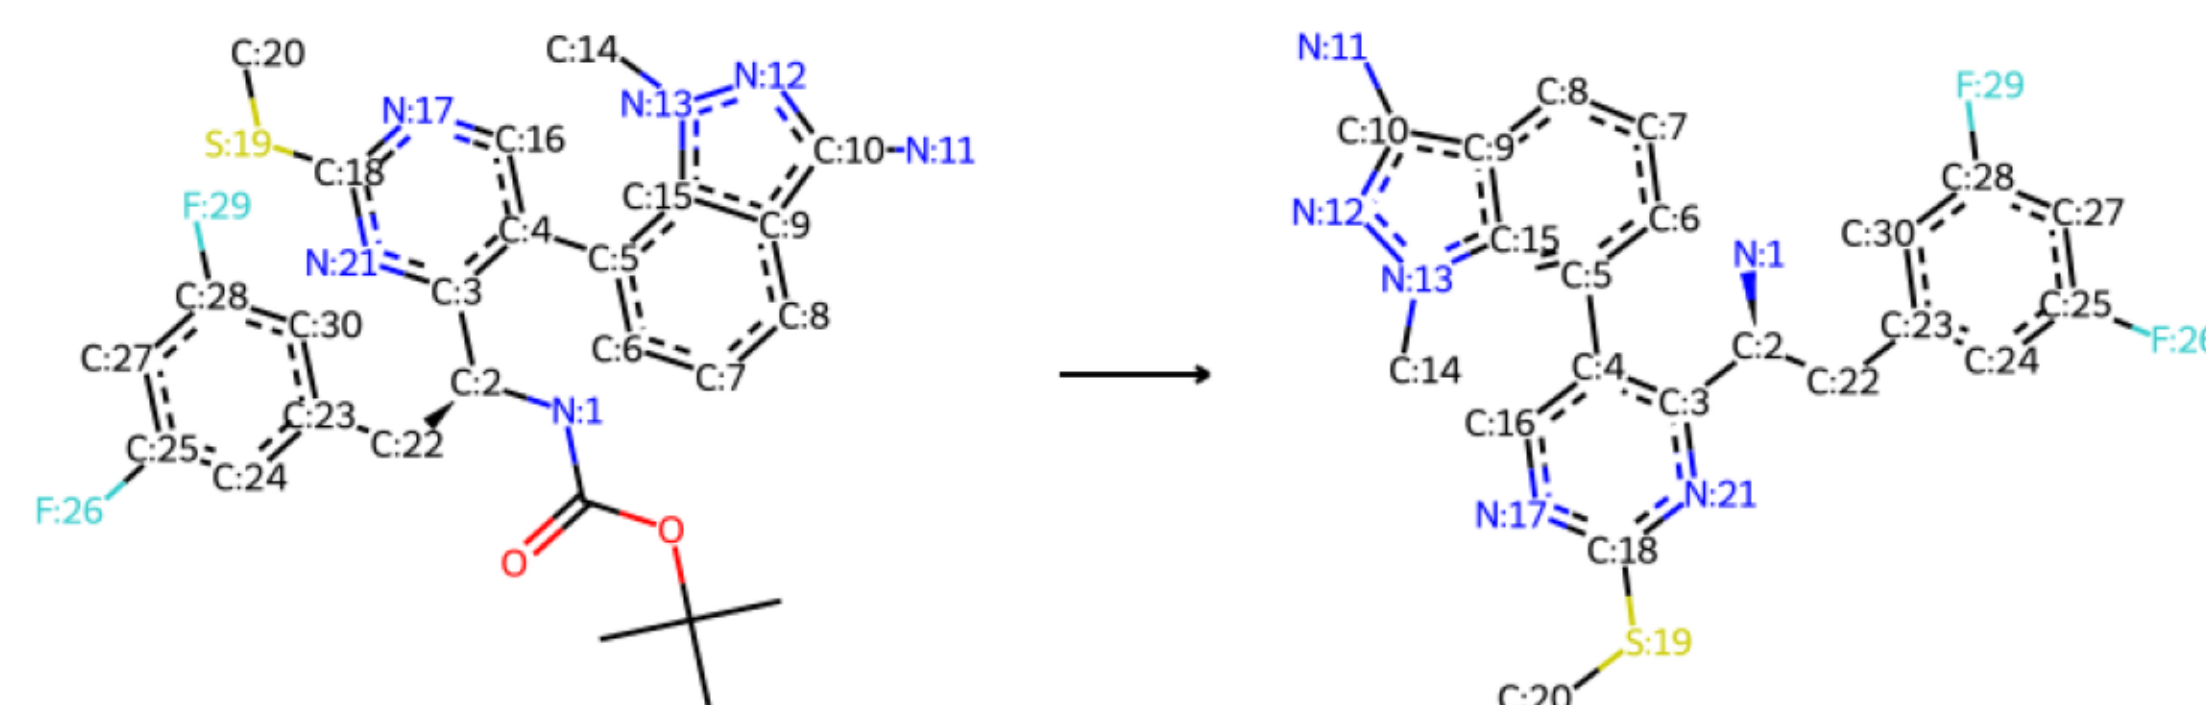

Identified mechanistic class -  
Boc\_deprotection reaction

Reaction with missing reagents recovered

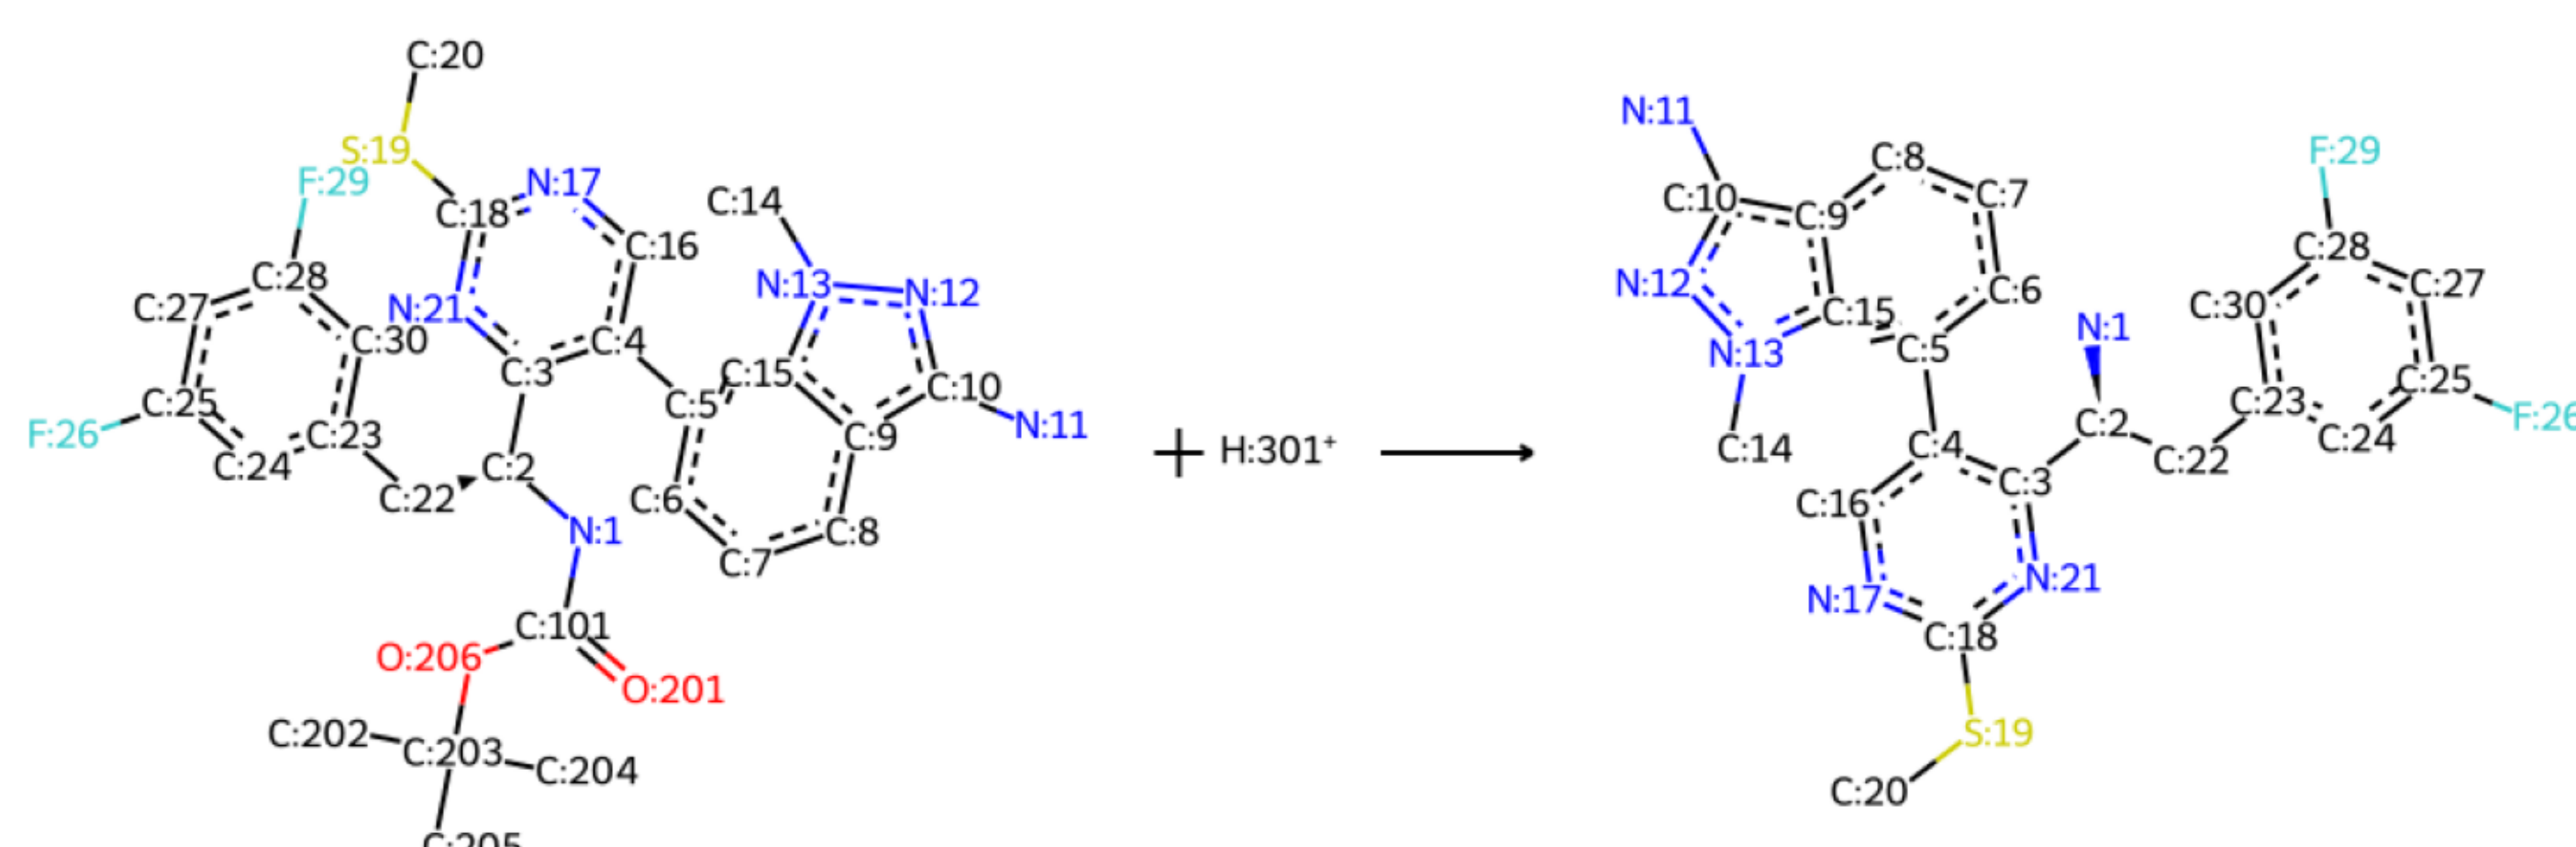

Proposed mechanistic pathway

[Arrow order: (1) green, (2) blue, (3) red, (4) orange]

step #1

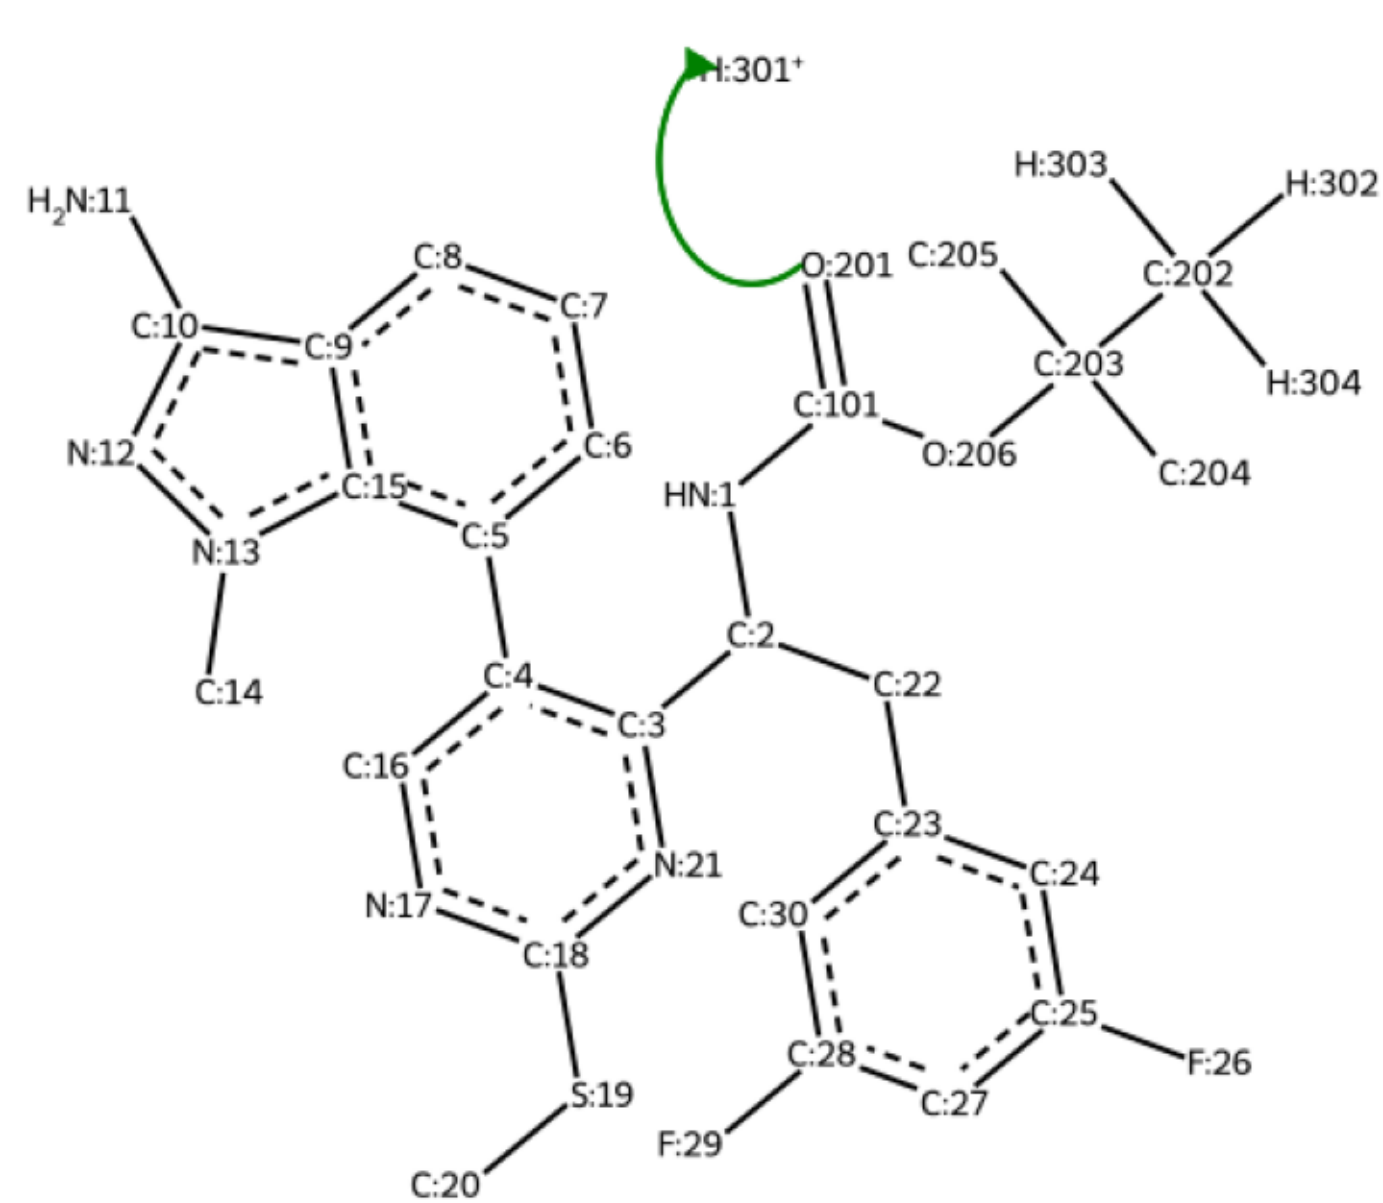

step #2

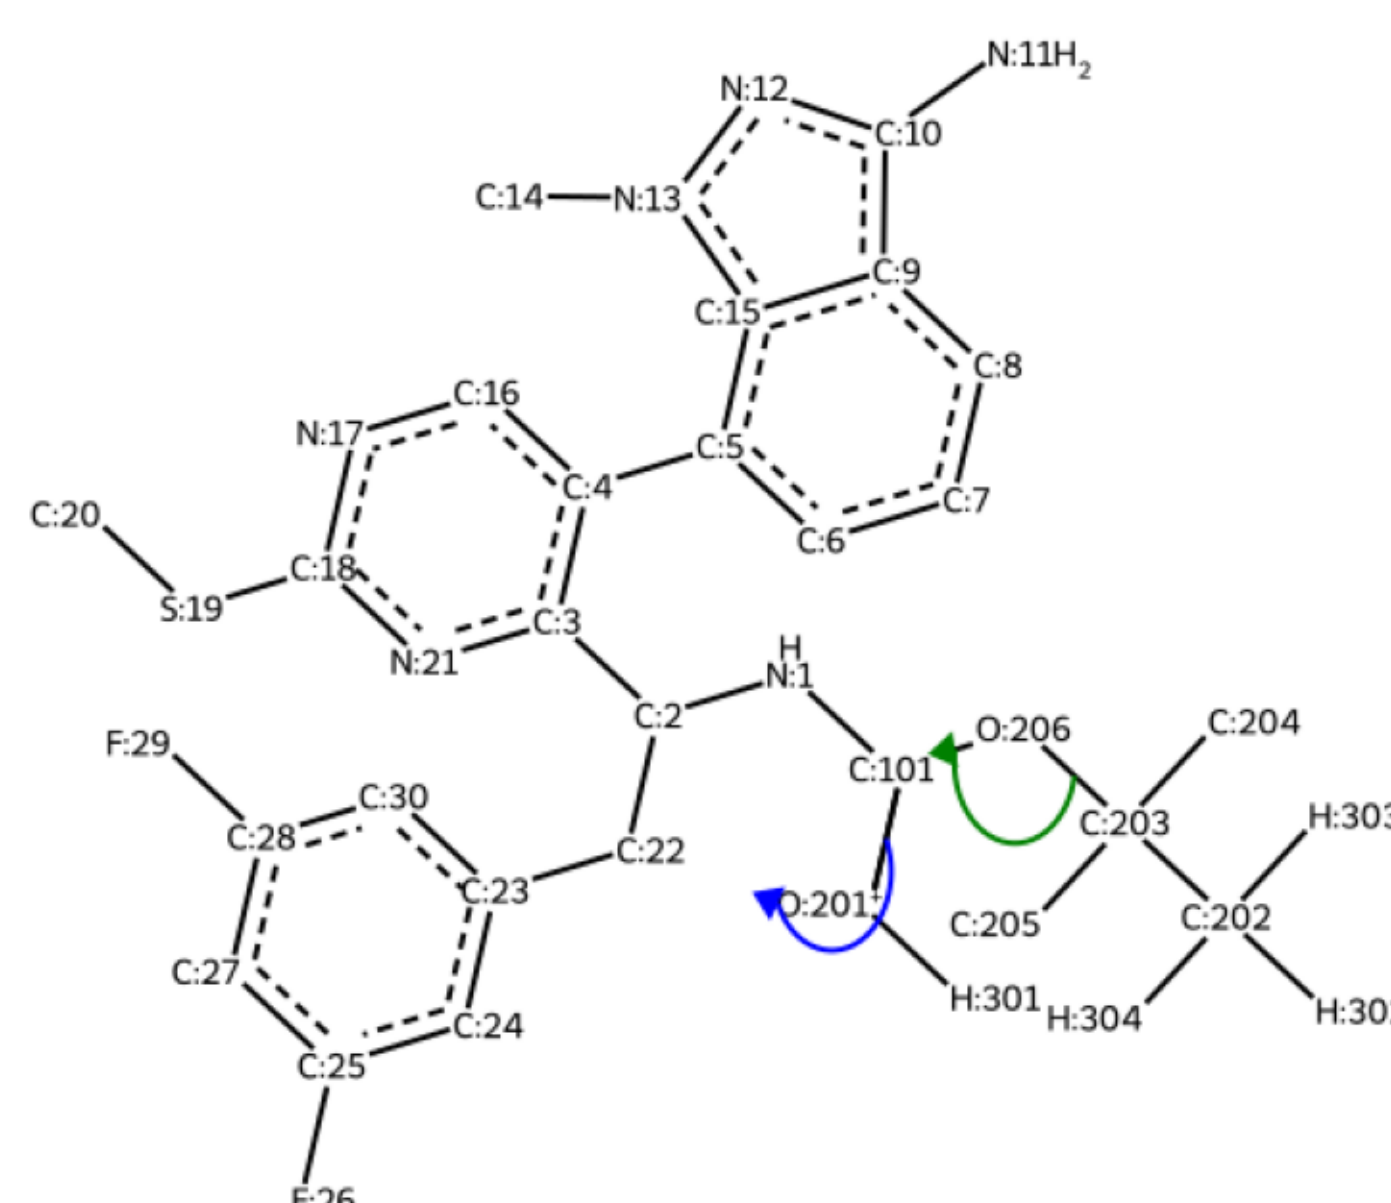

step #3

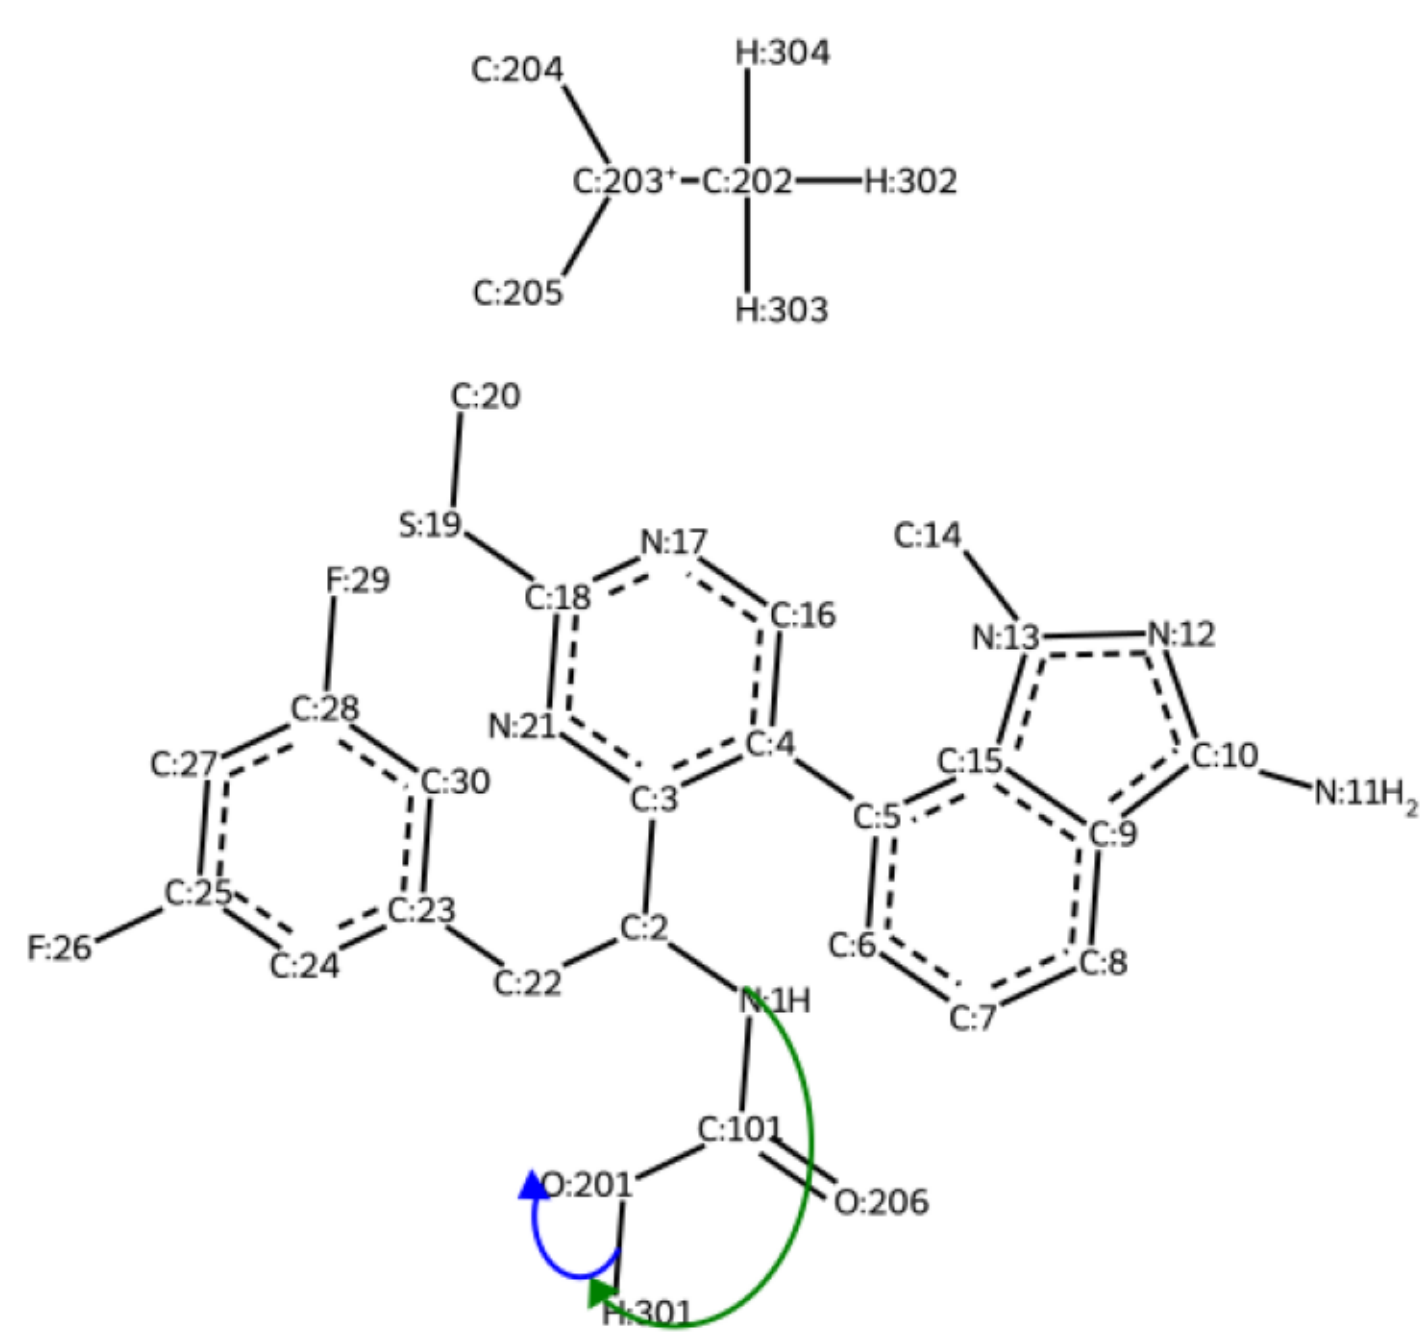

step #4

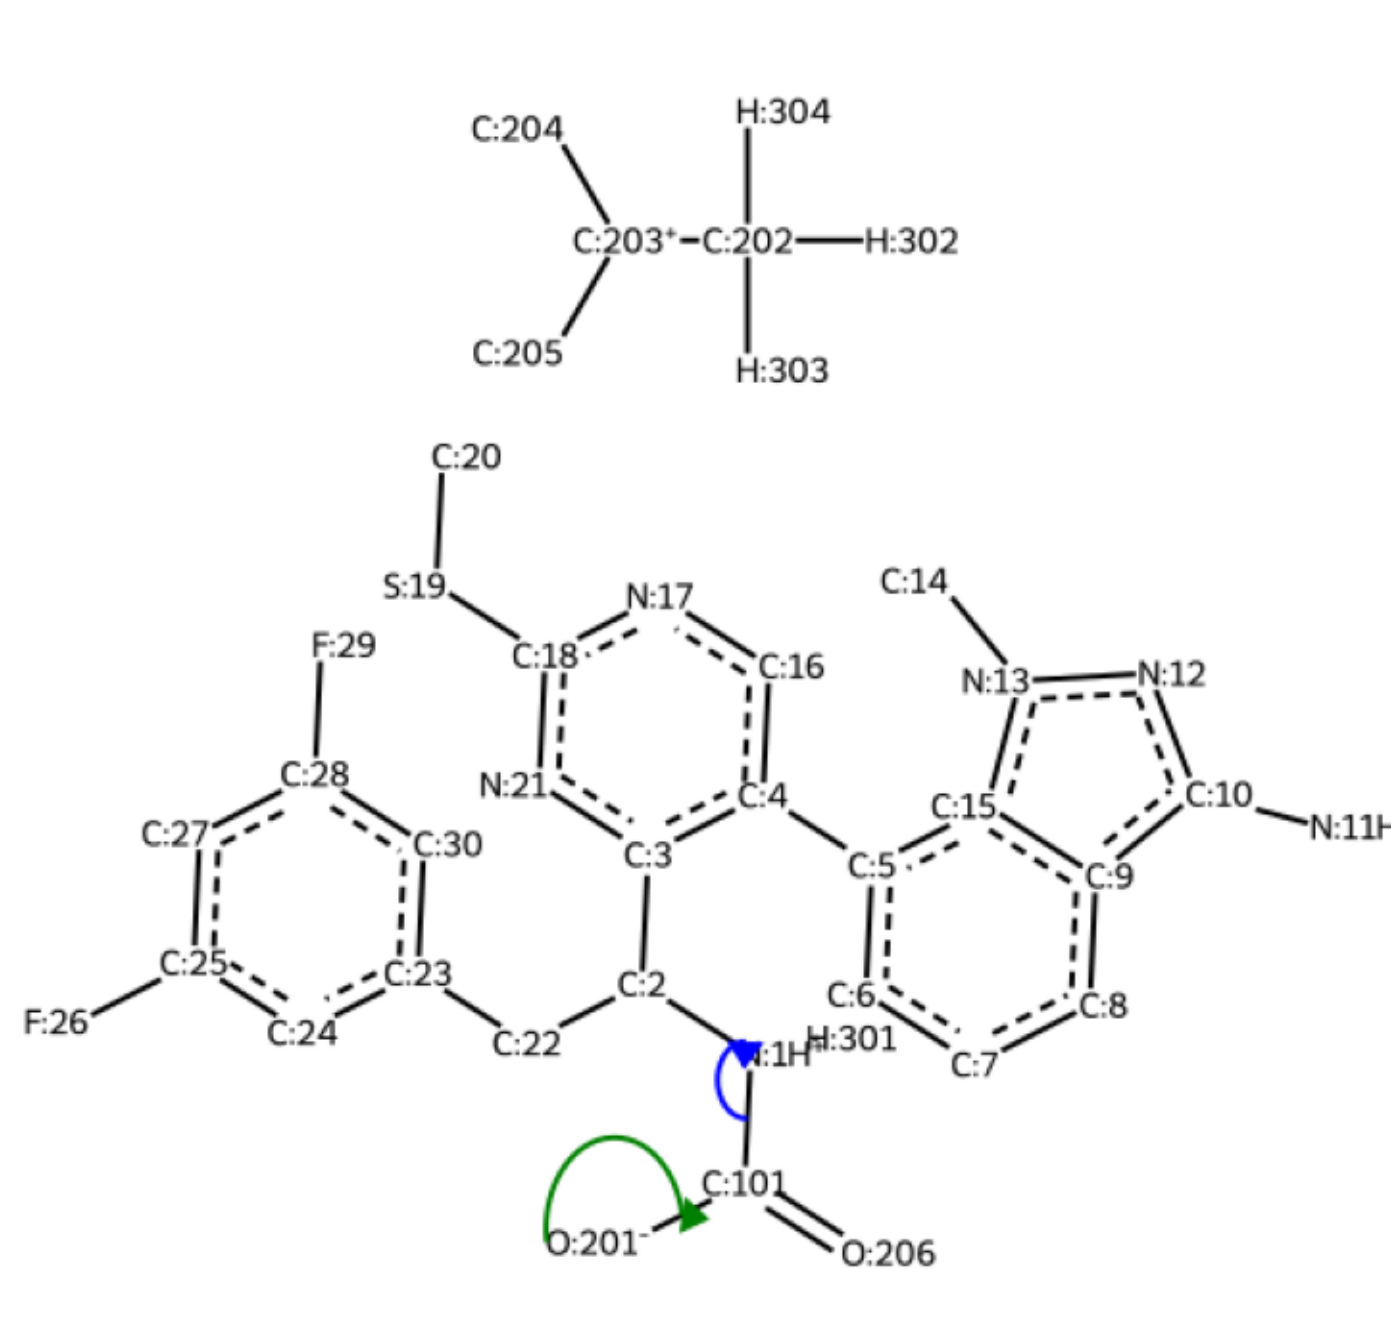

step #5

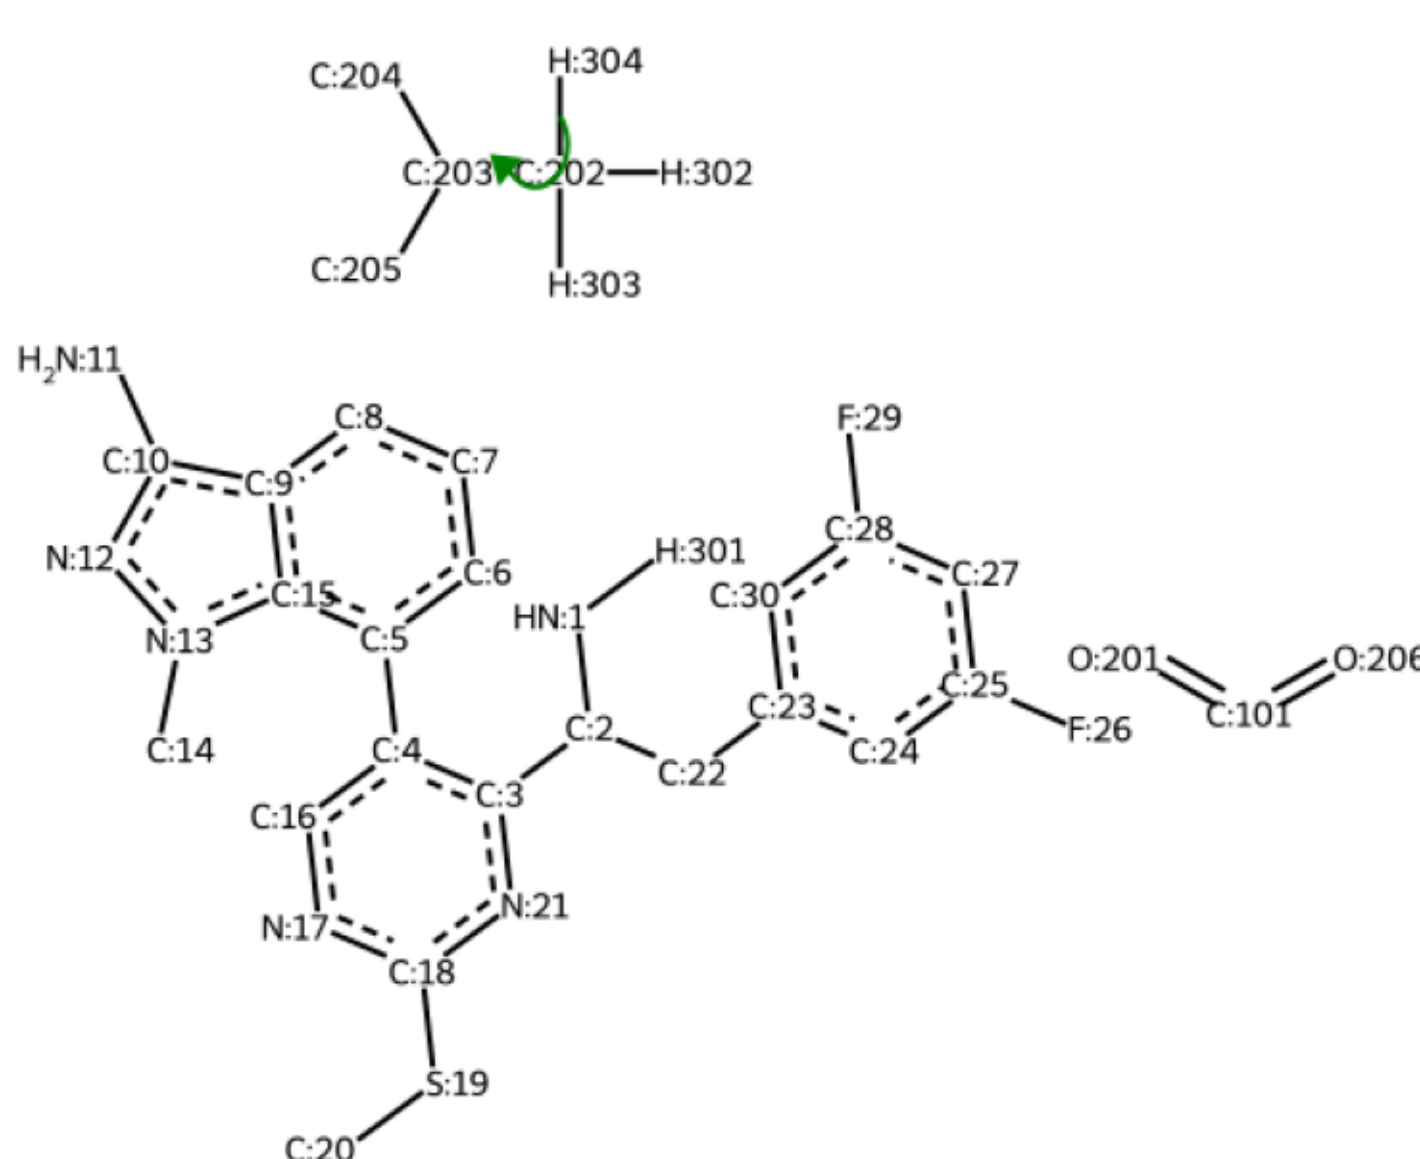

Product(s)

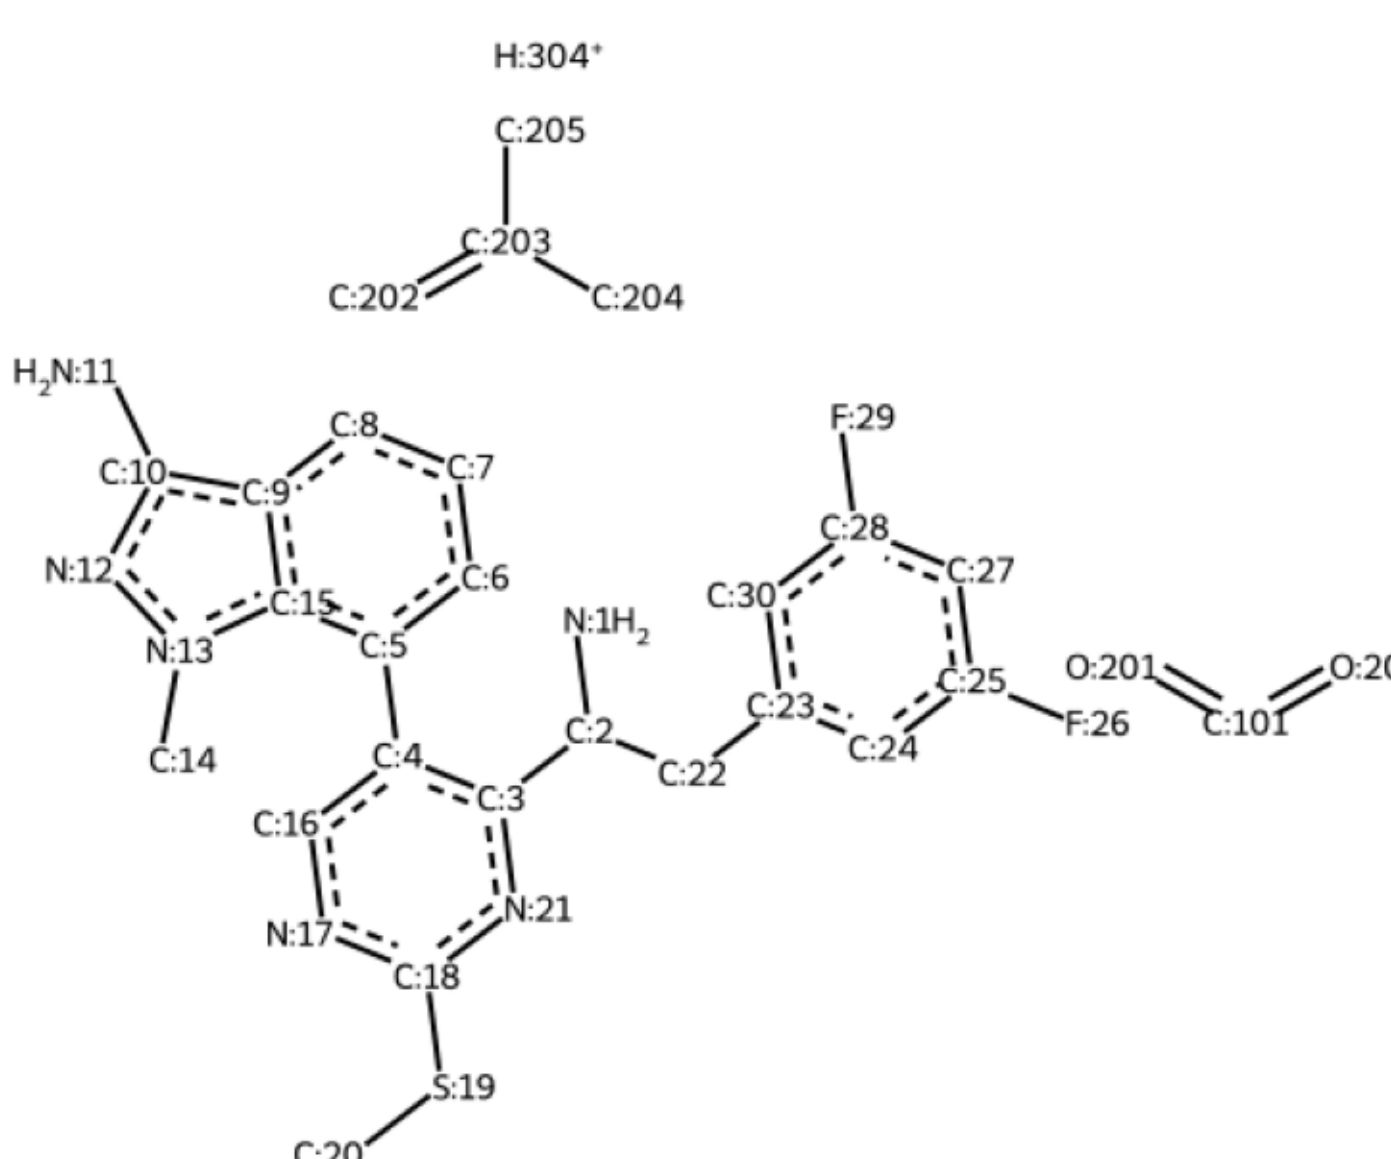



# Original reaction sampled RXN\_ID:57)

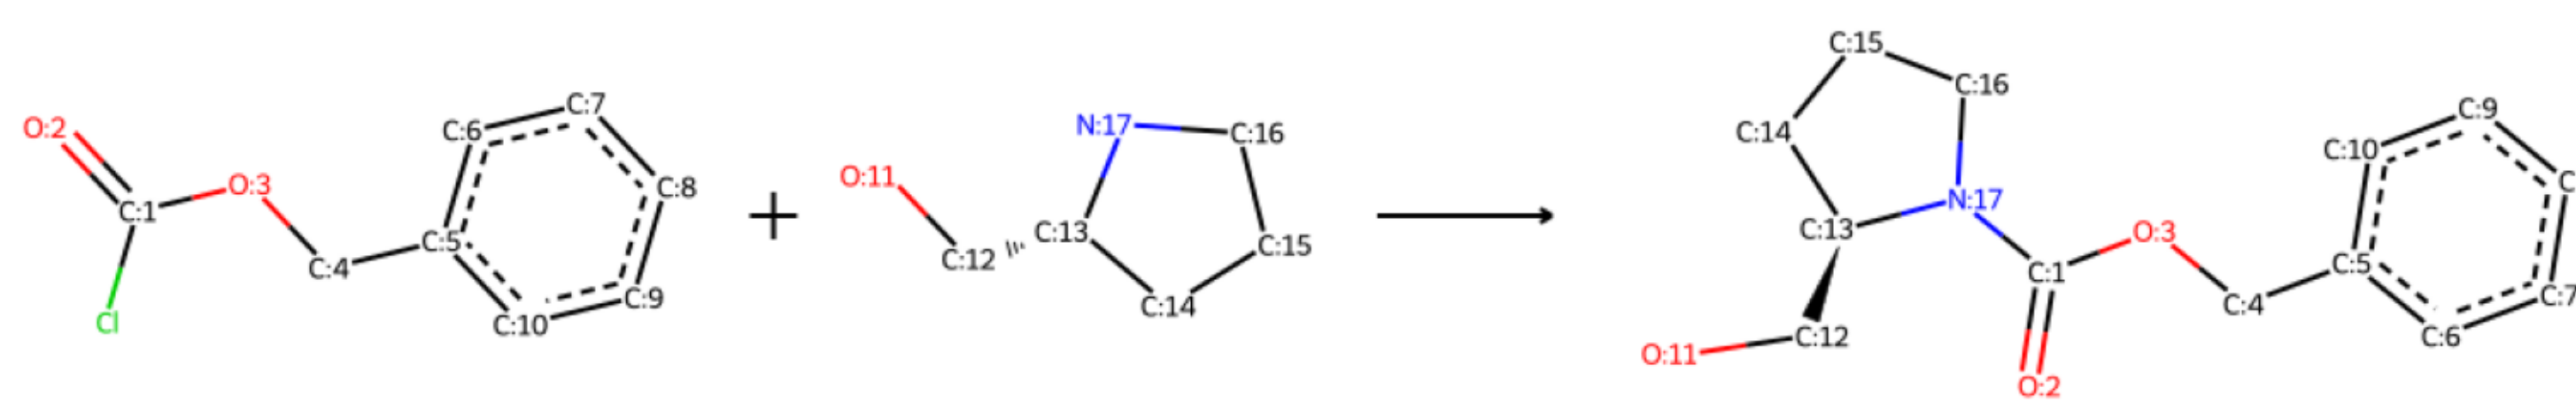

Identified mechanistic class -  
nucleophilic\_attack\_to\_(thio)carbonyl\_or\_sulfonyl reaction

## Reaction with missing reagents recovered

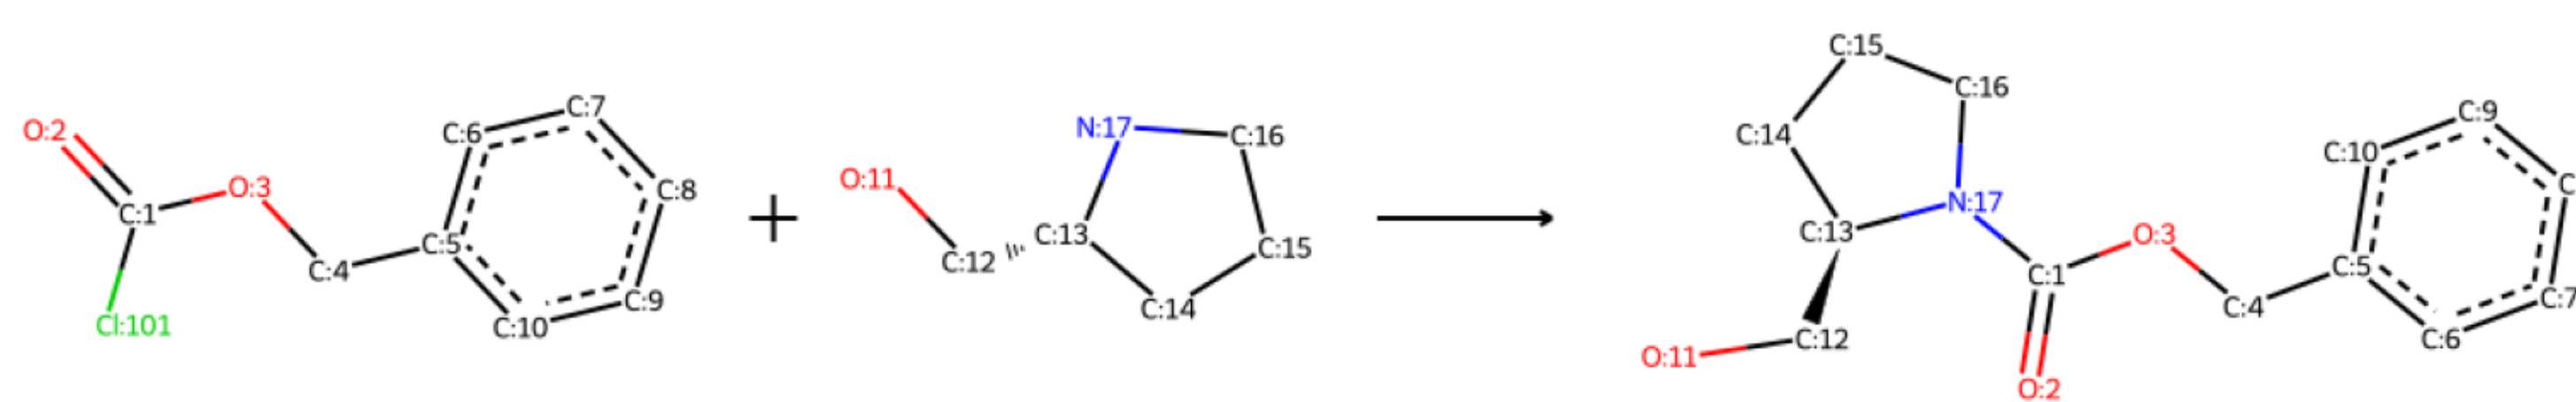

## Proposed mechanistic pathway

[Arrow order: (1) green, (2) blue, (3) red, (4) orange]

step #1

step #2

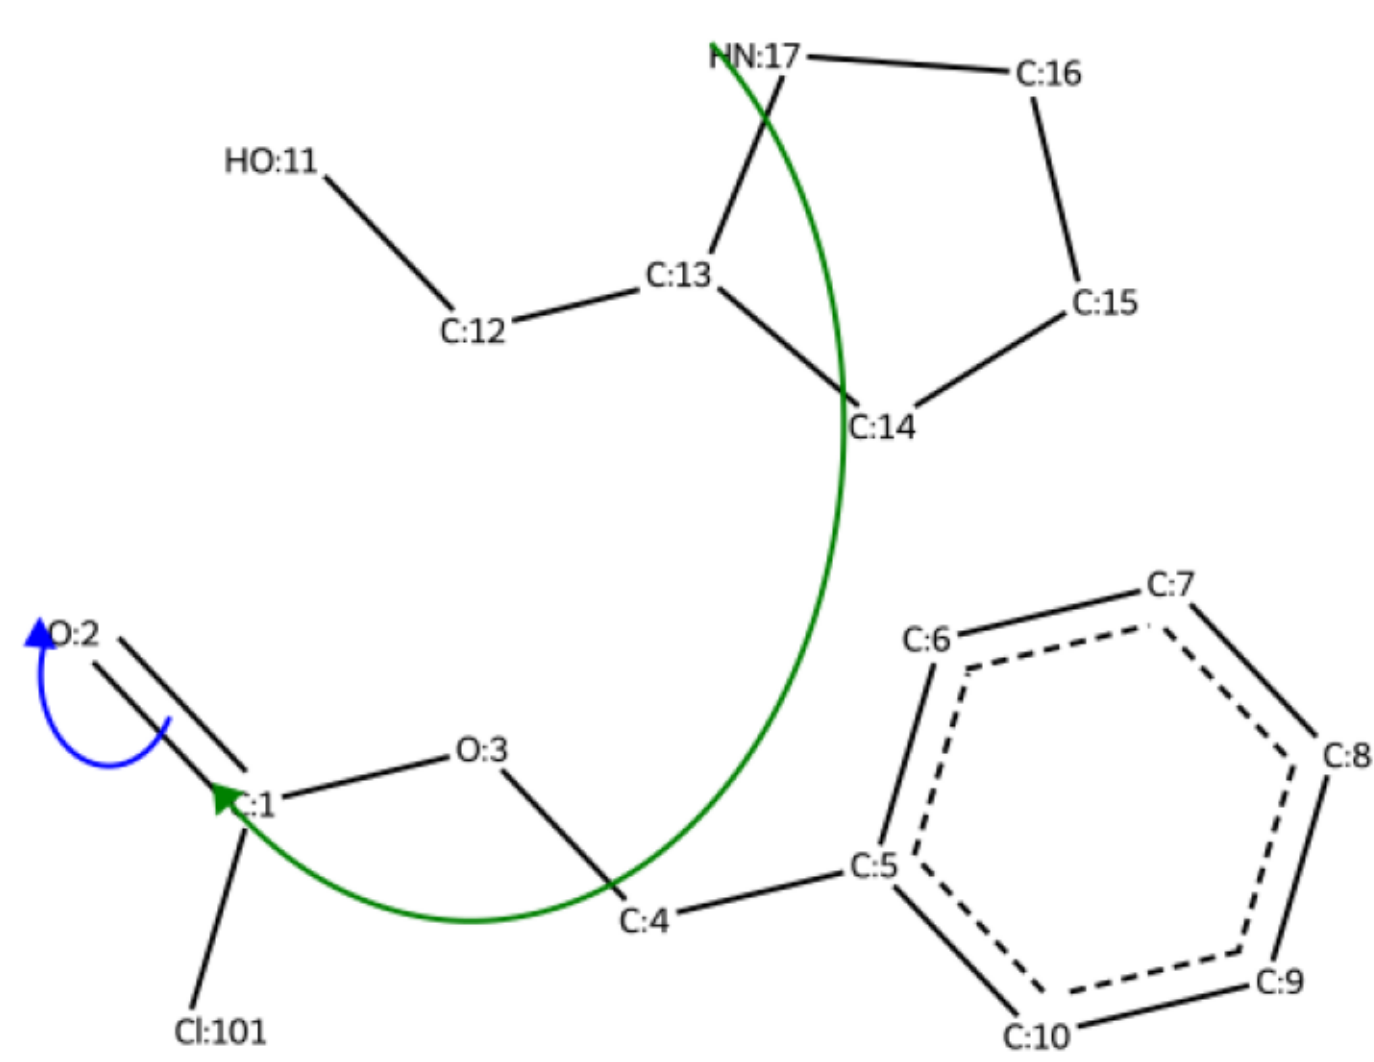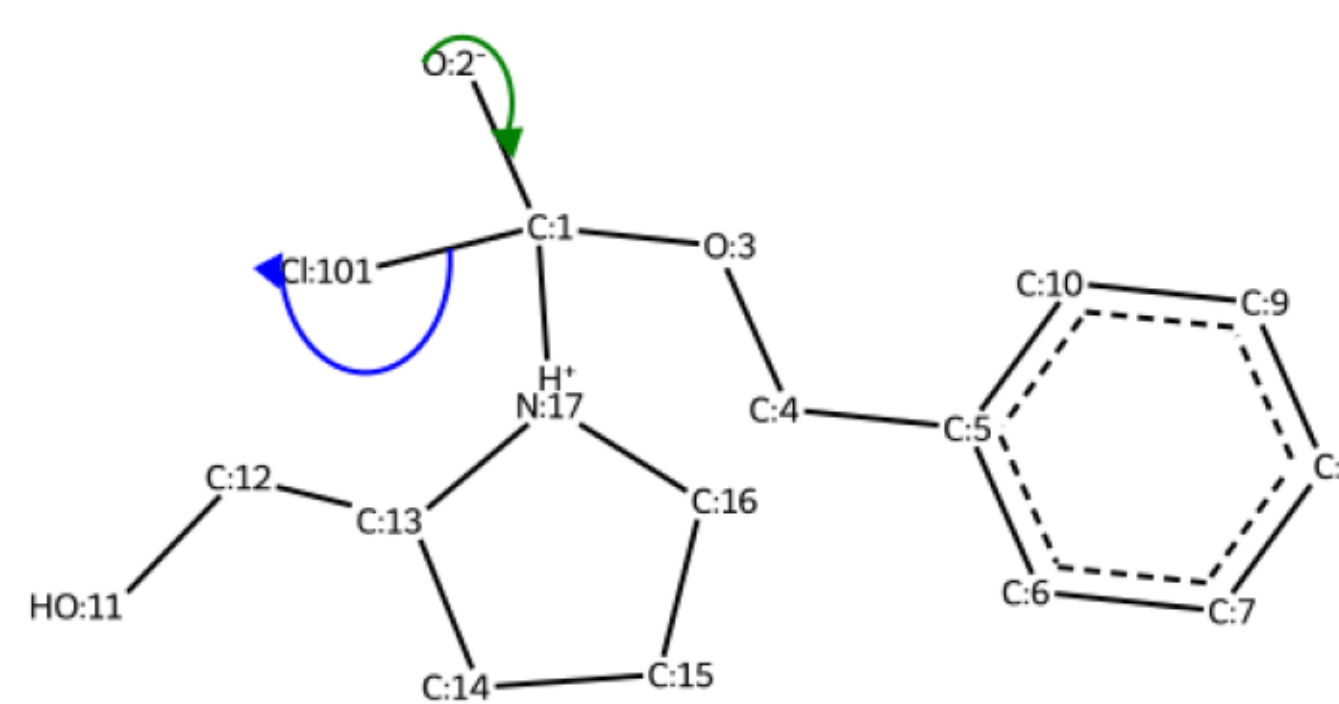

Product(s)

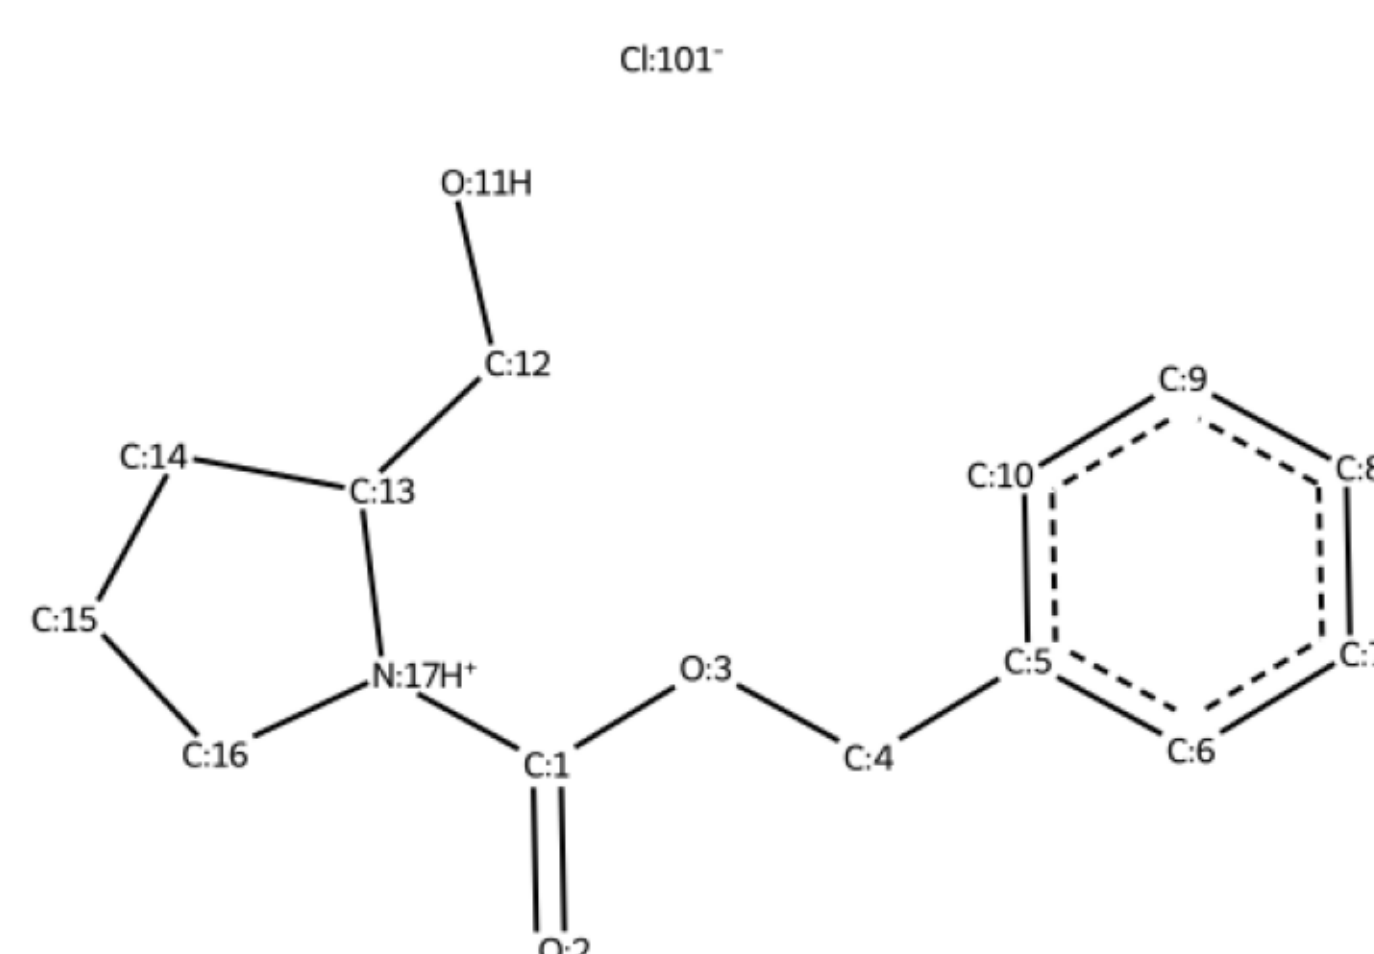

proton transfer

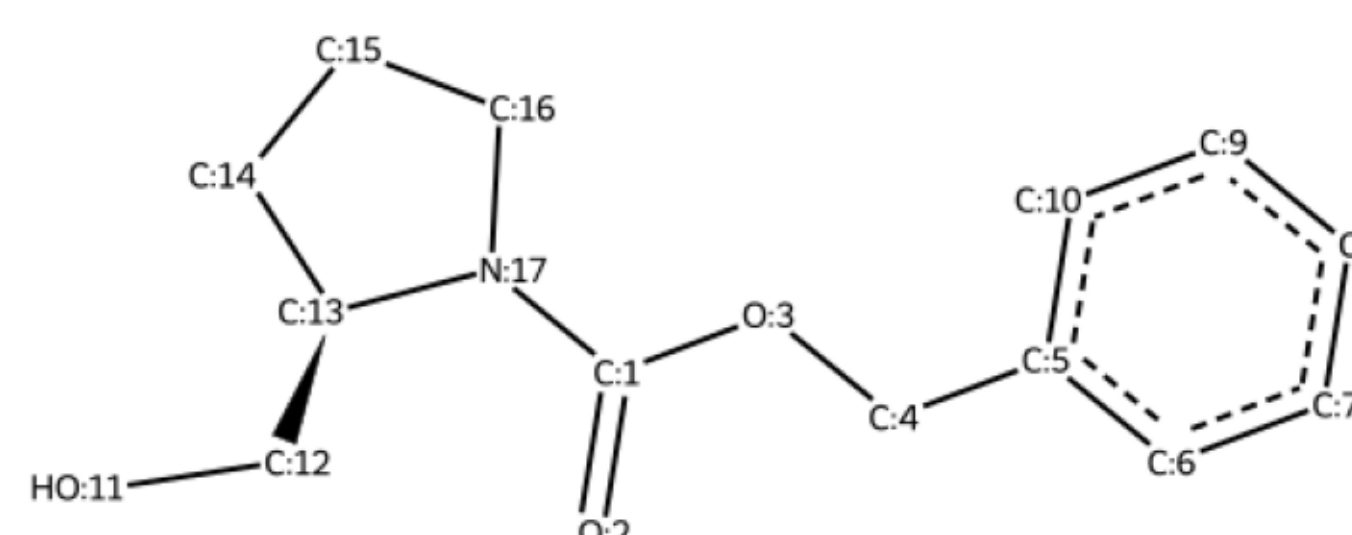



Original reaction  
sampled RXN\_ID:58)

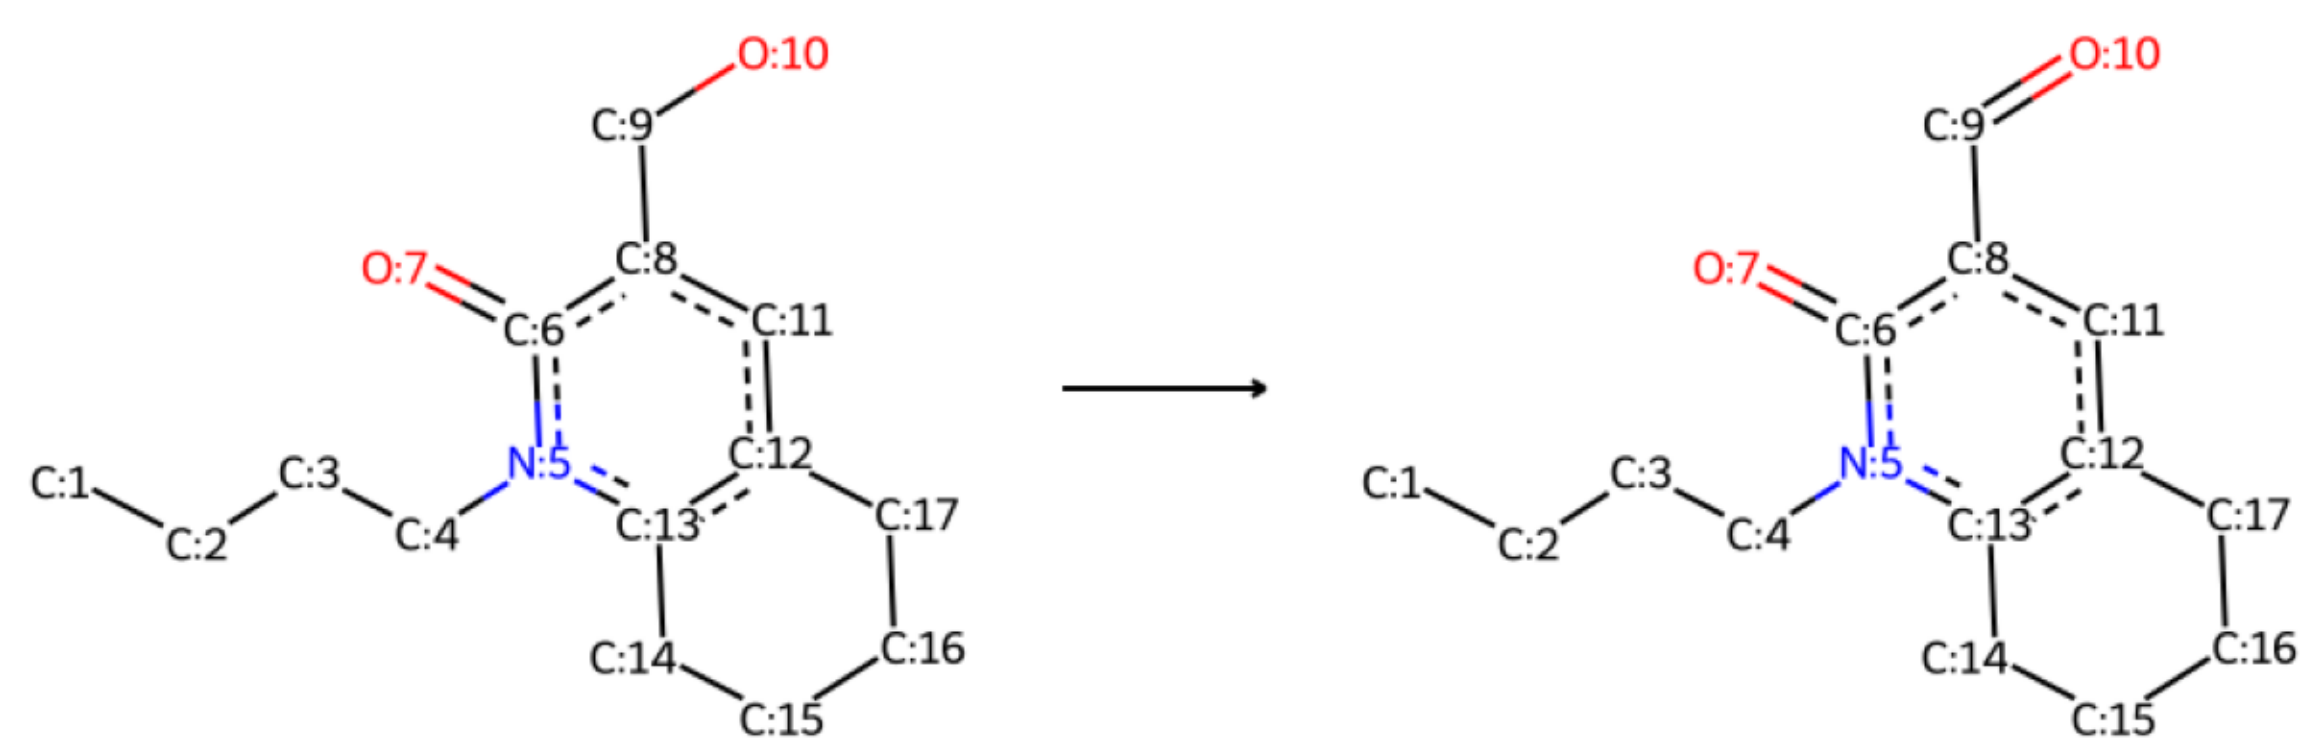

Identified mechanistic class -  
Swern\_oxidation reaction

Reaction with missing reagents recovered

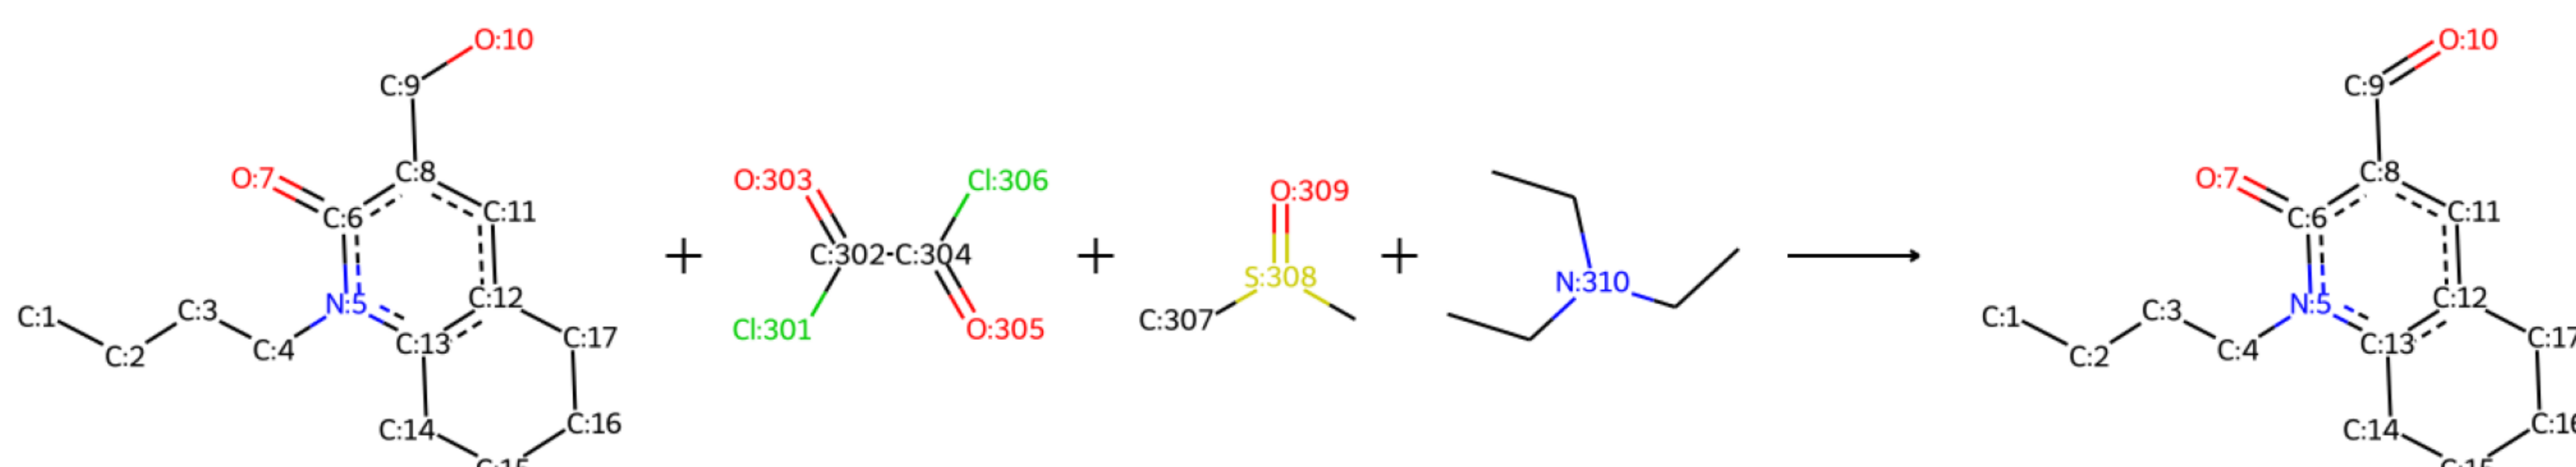

Proposed mechanistic pathway

[Arrow order: (1) green, (2) blue, (3) red, (4) orange]

step #1

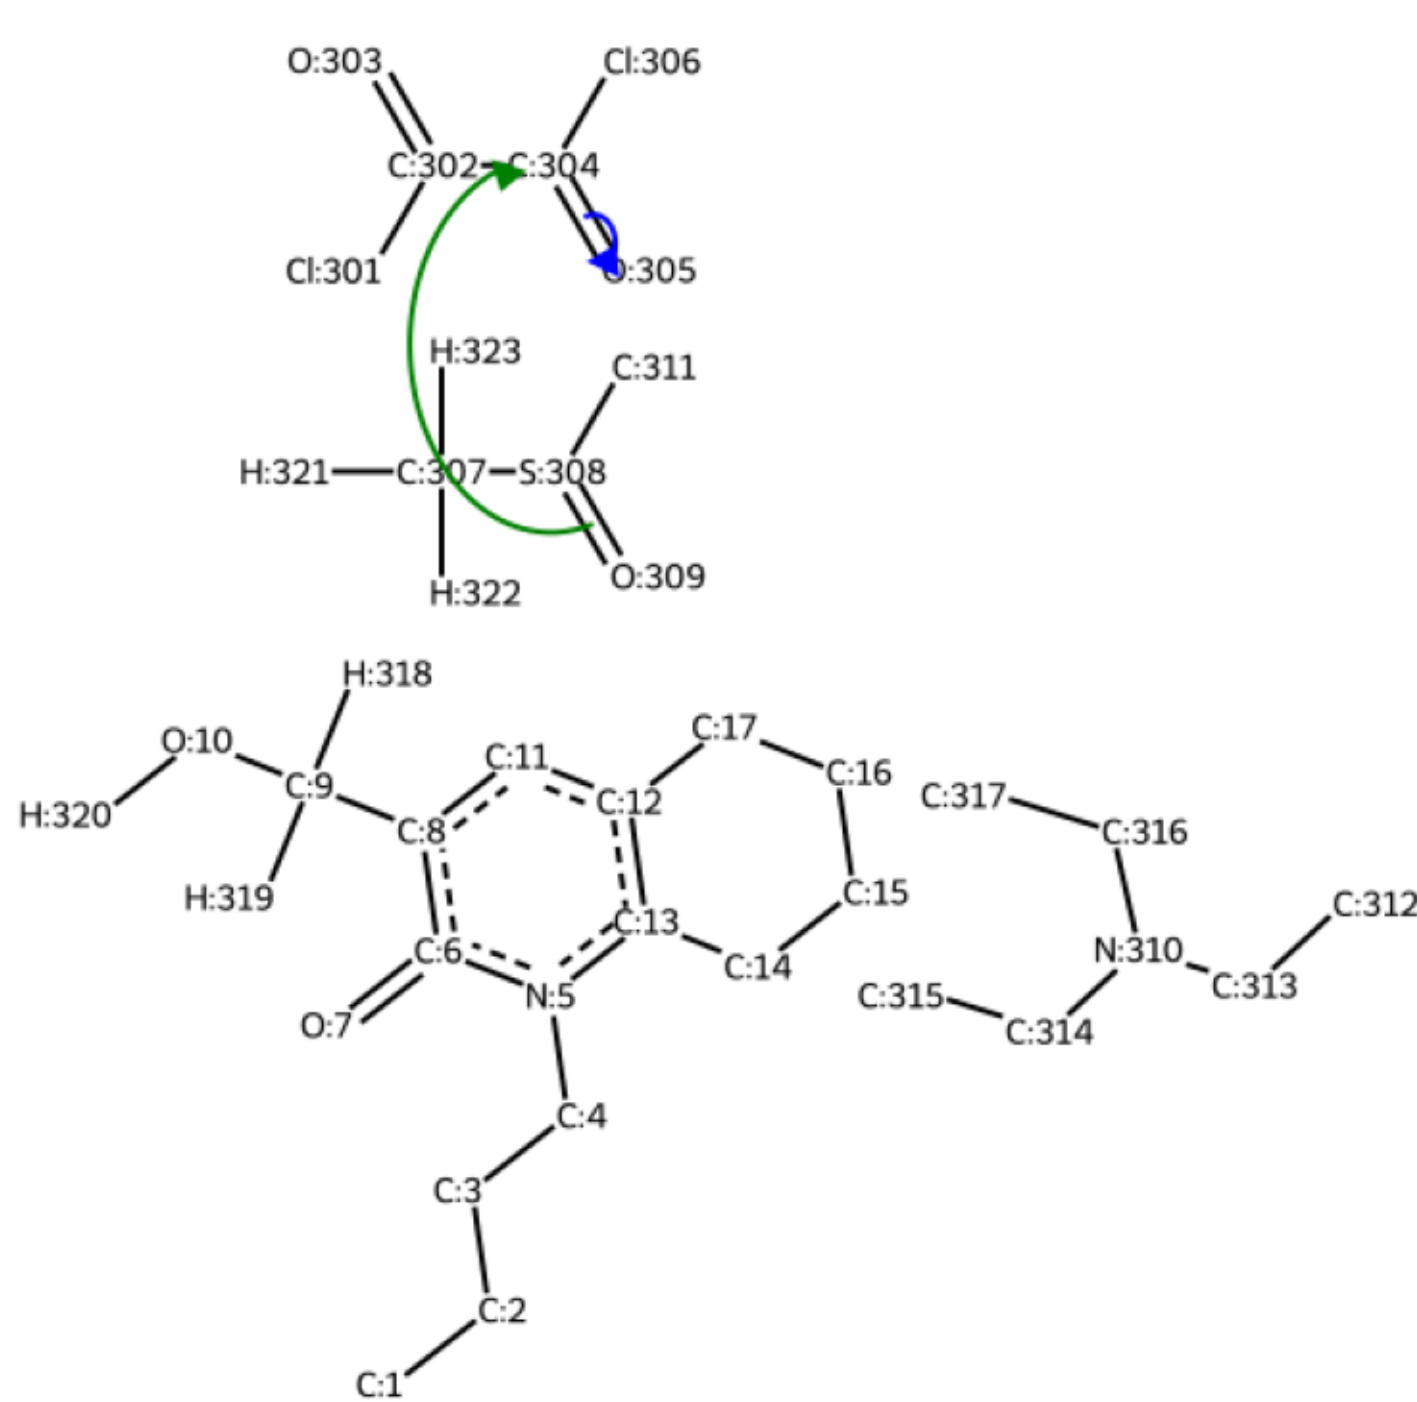

step #2

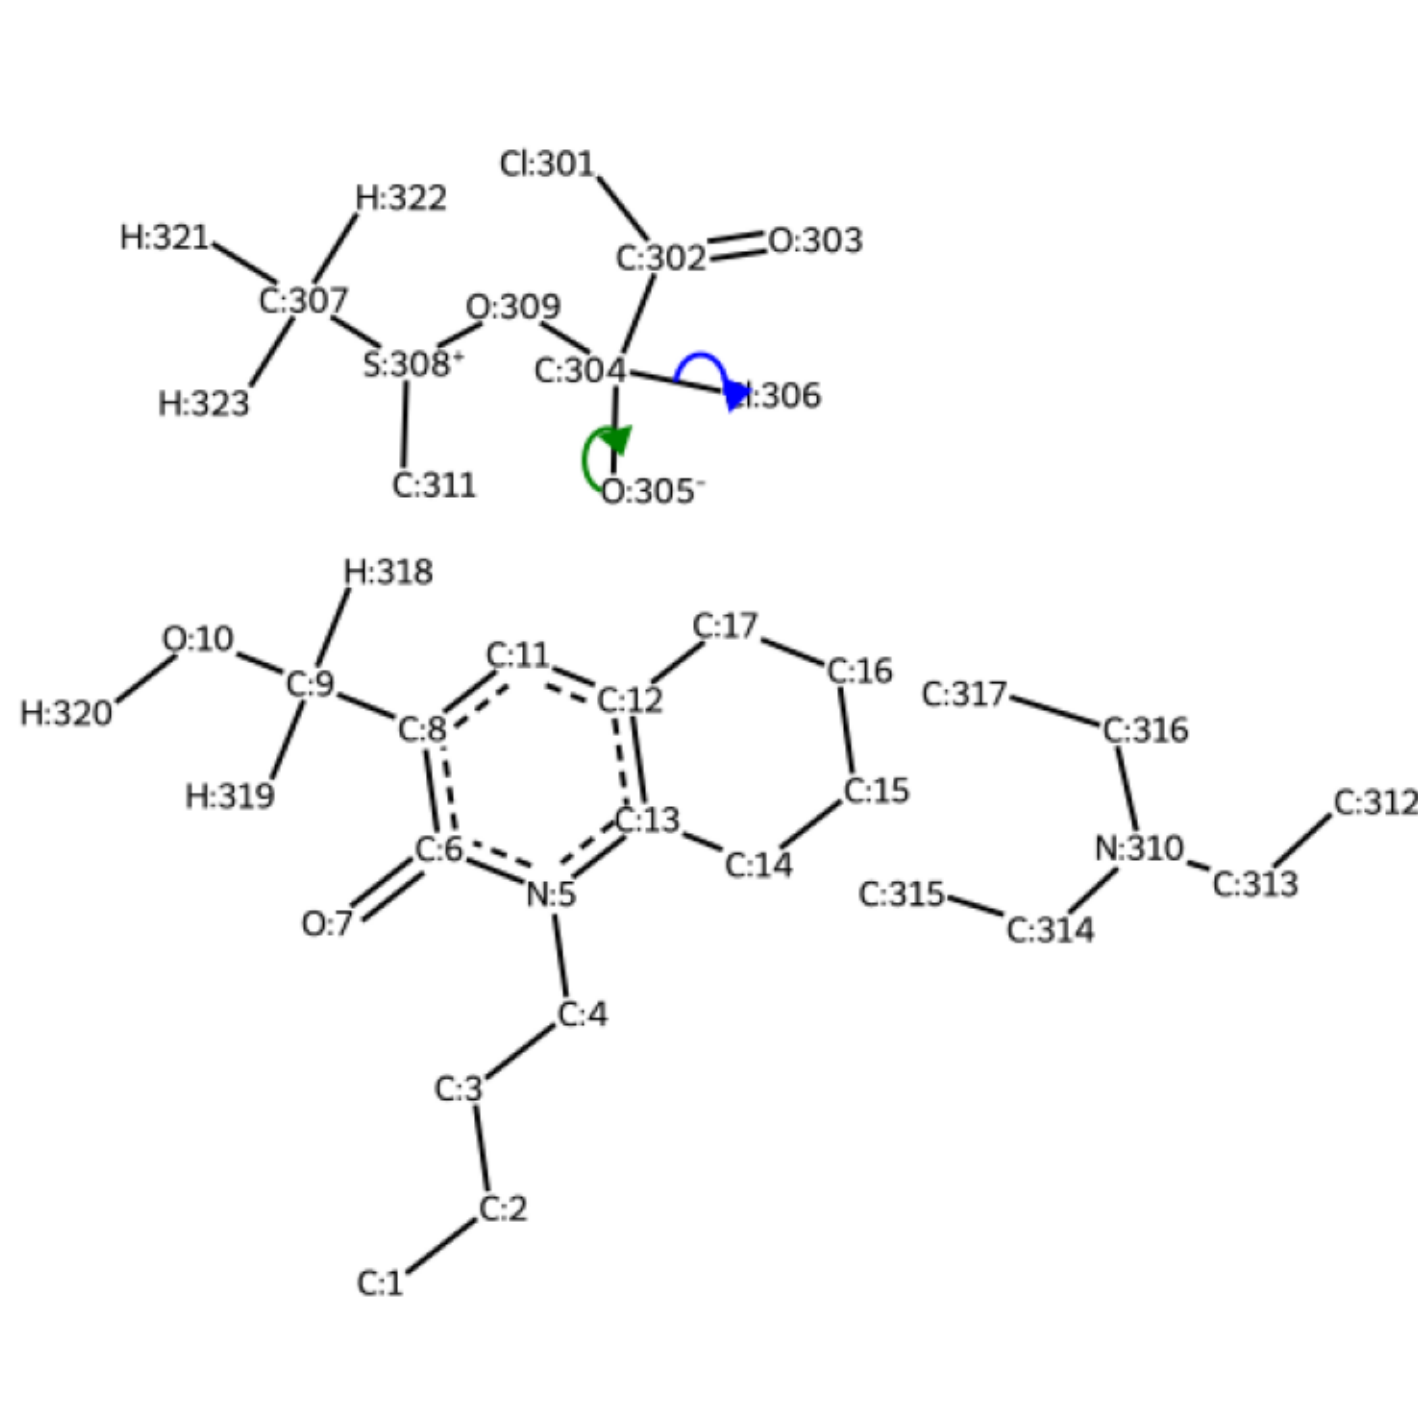

step #3

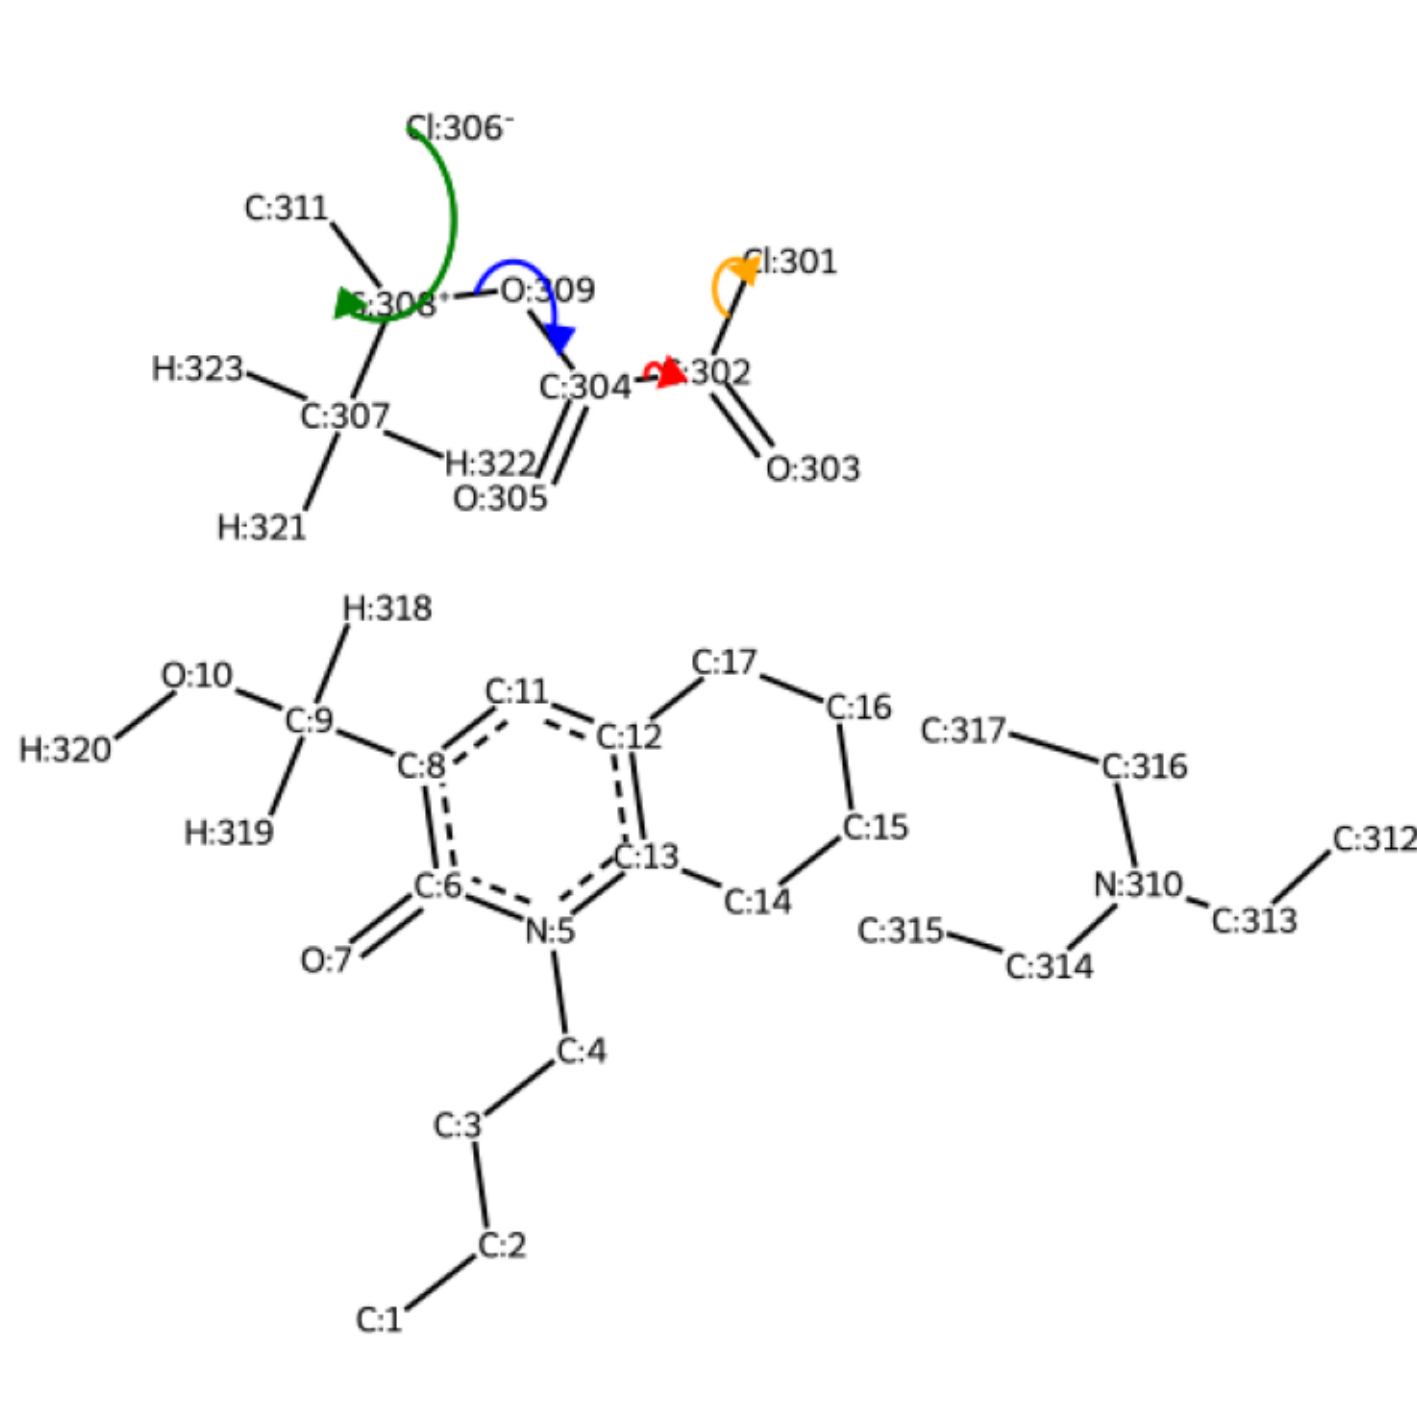

step #4

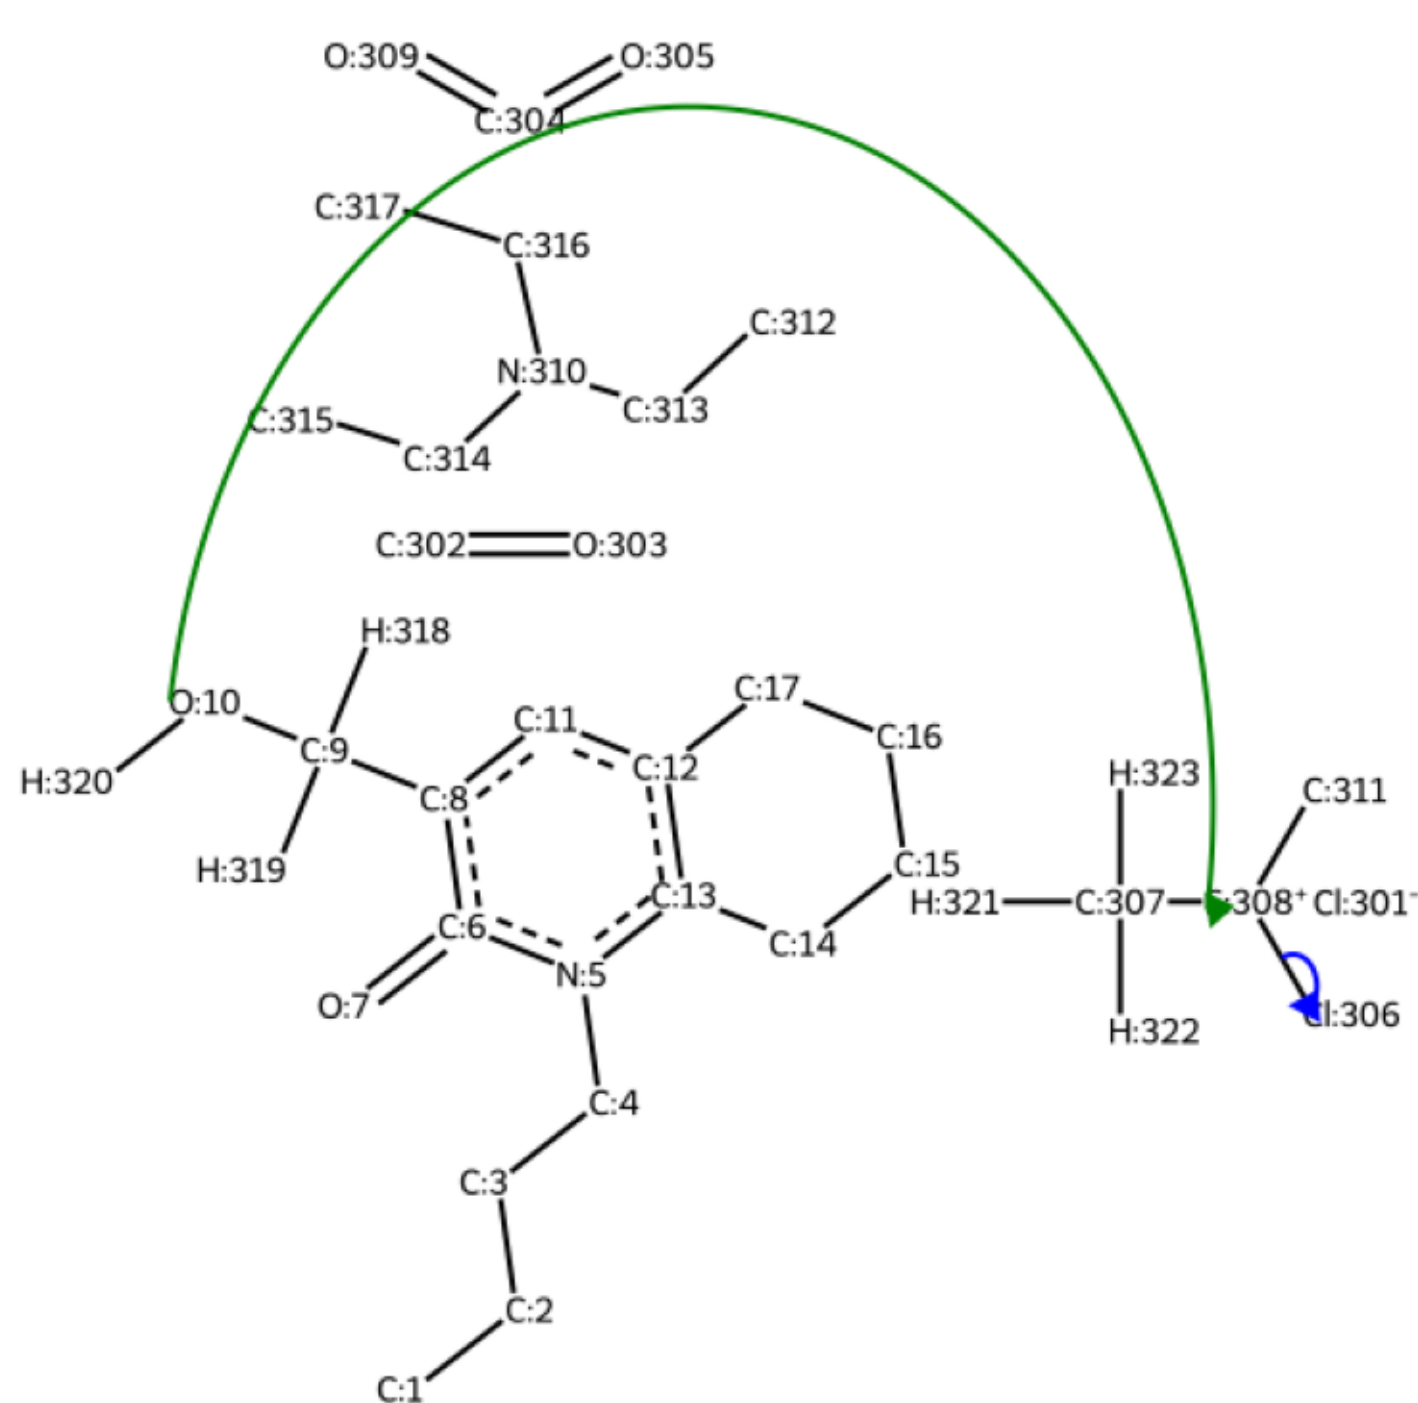

step #5

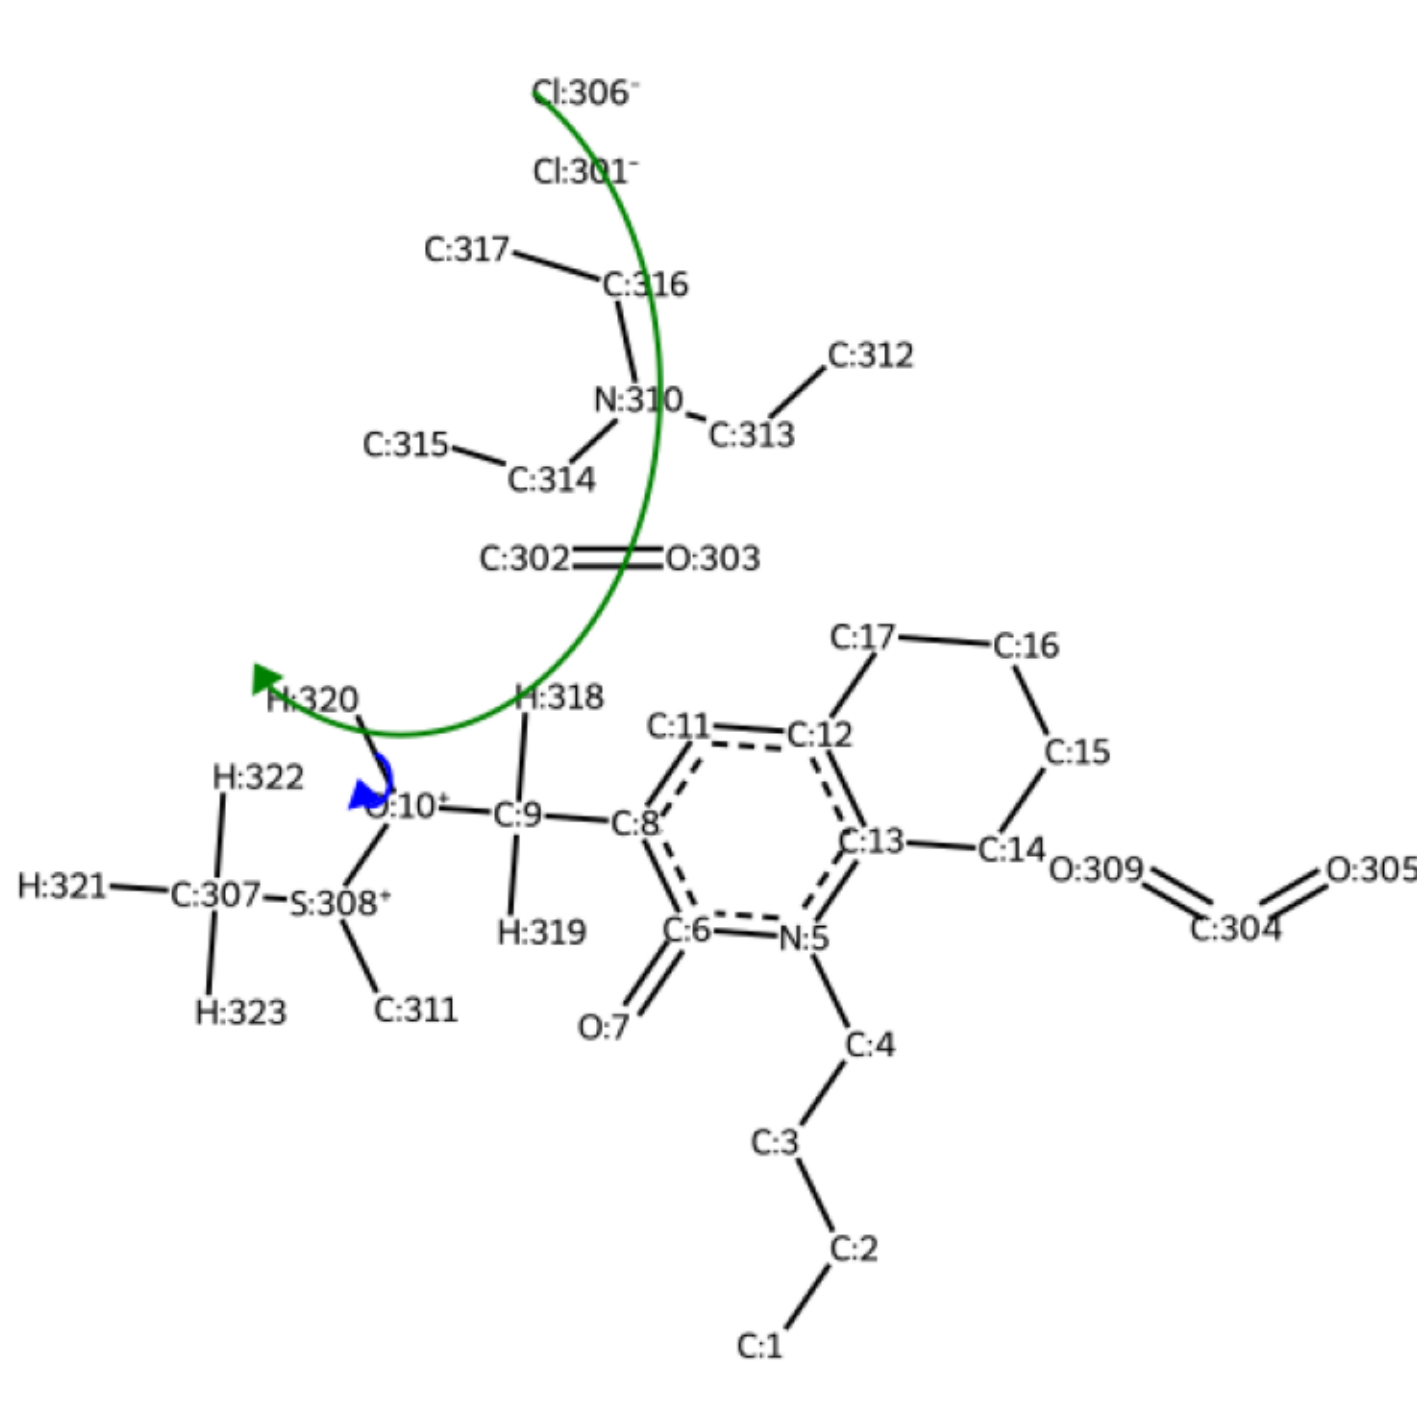

step #6

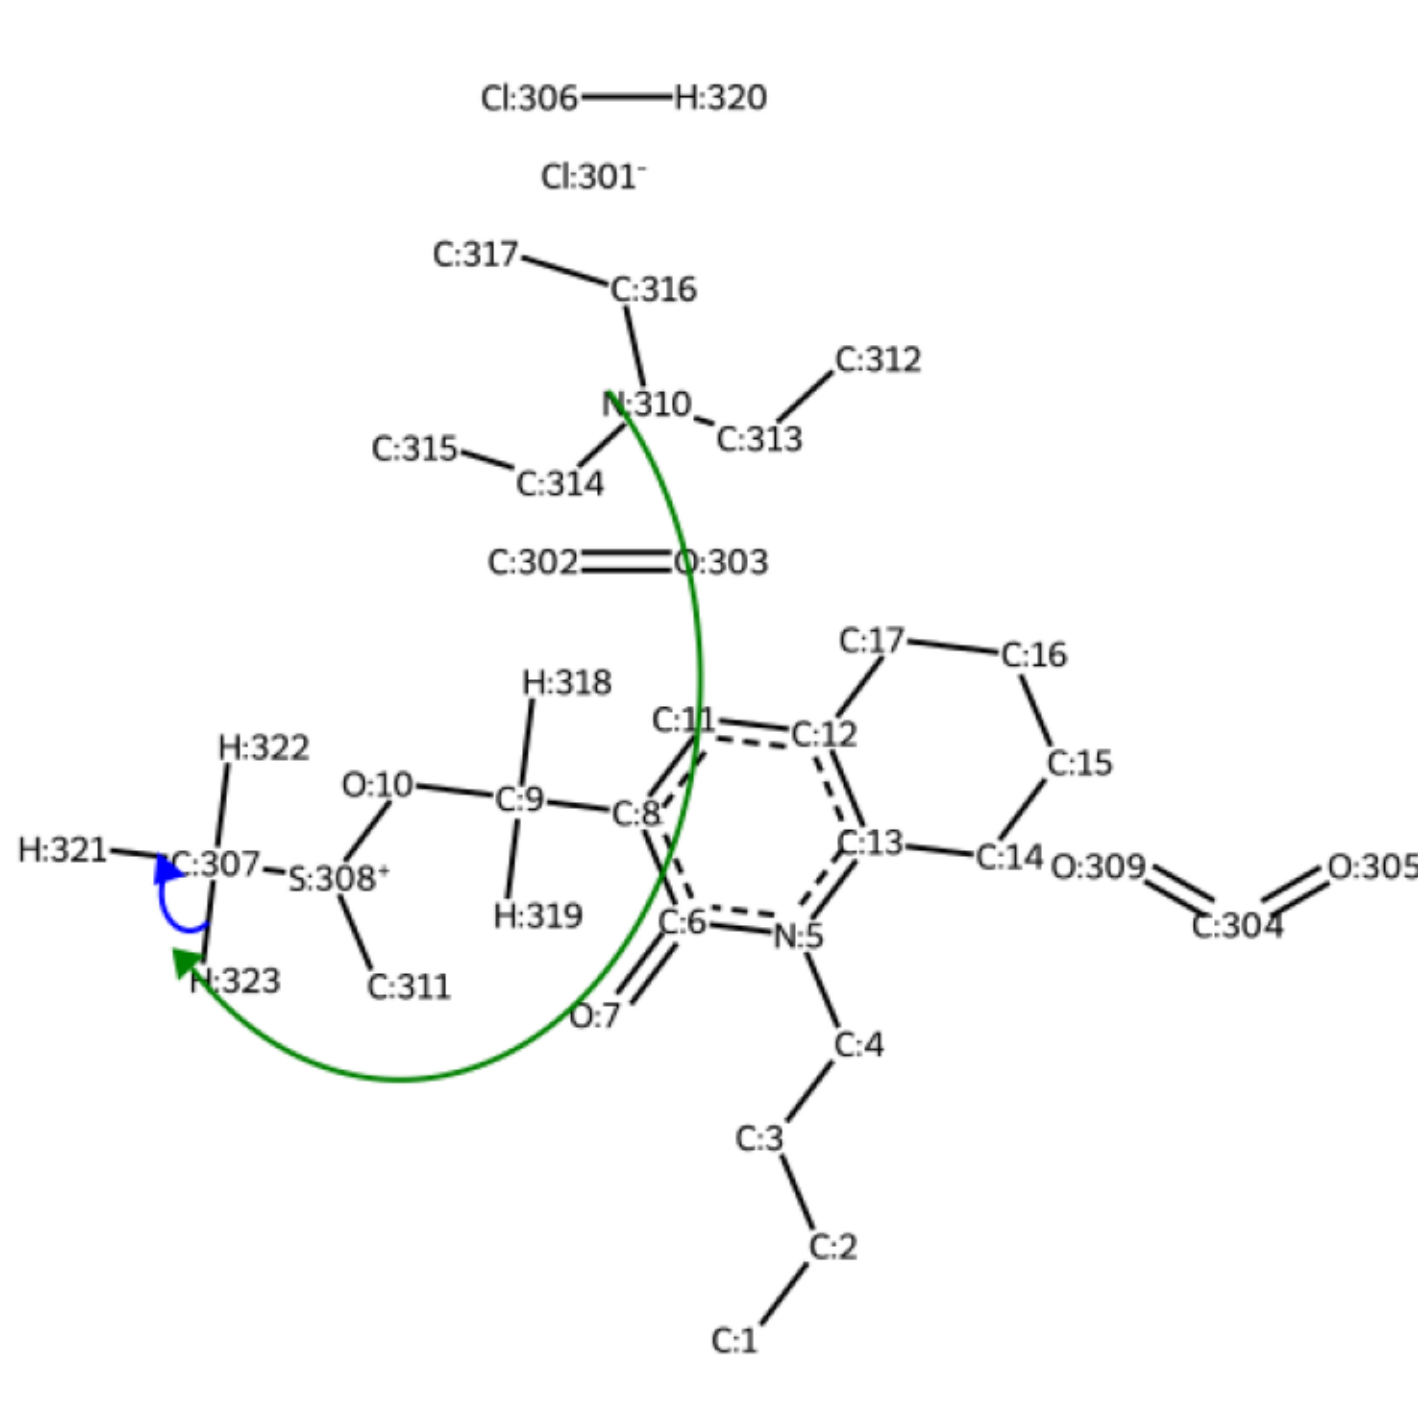

step #7

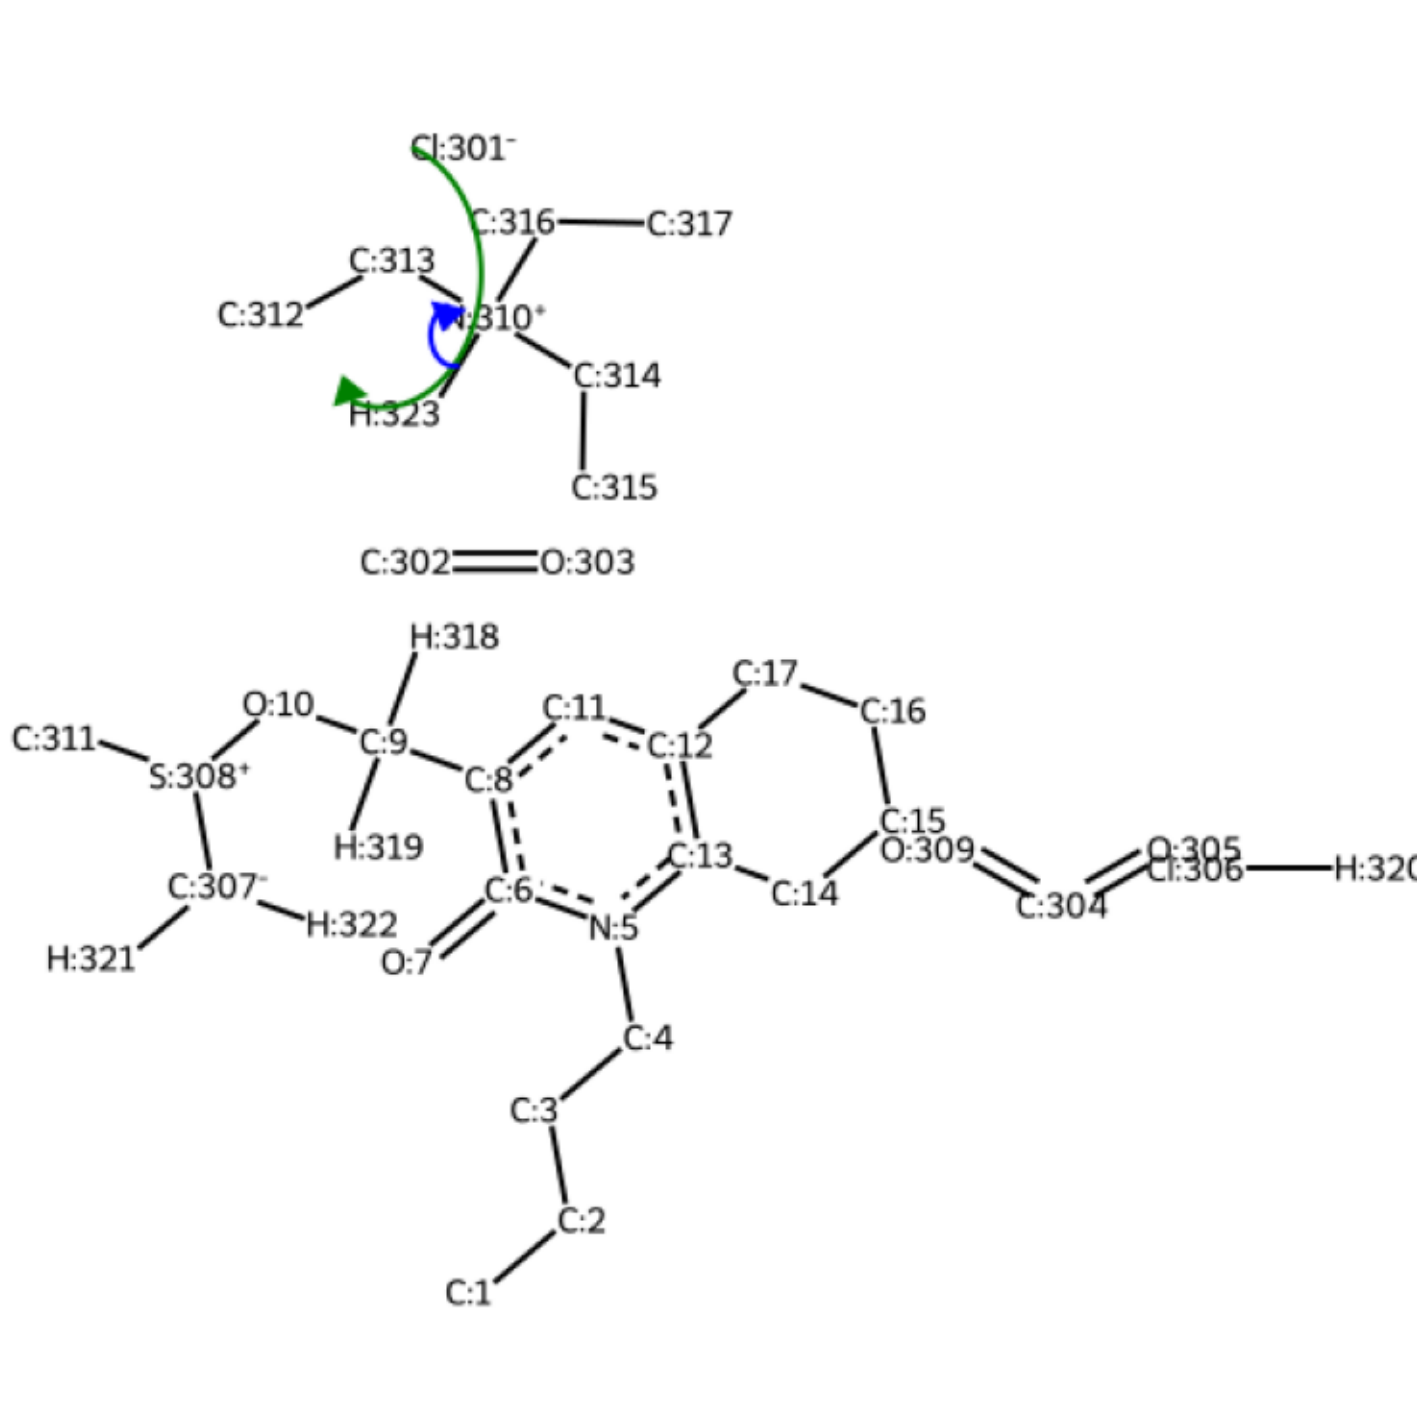

step #8

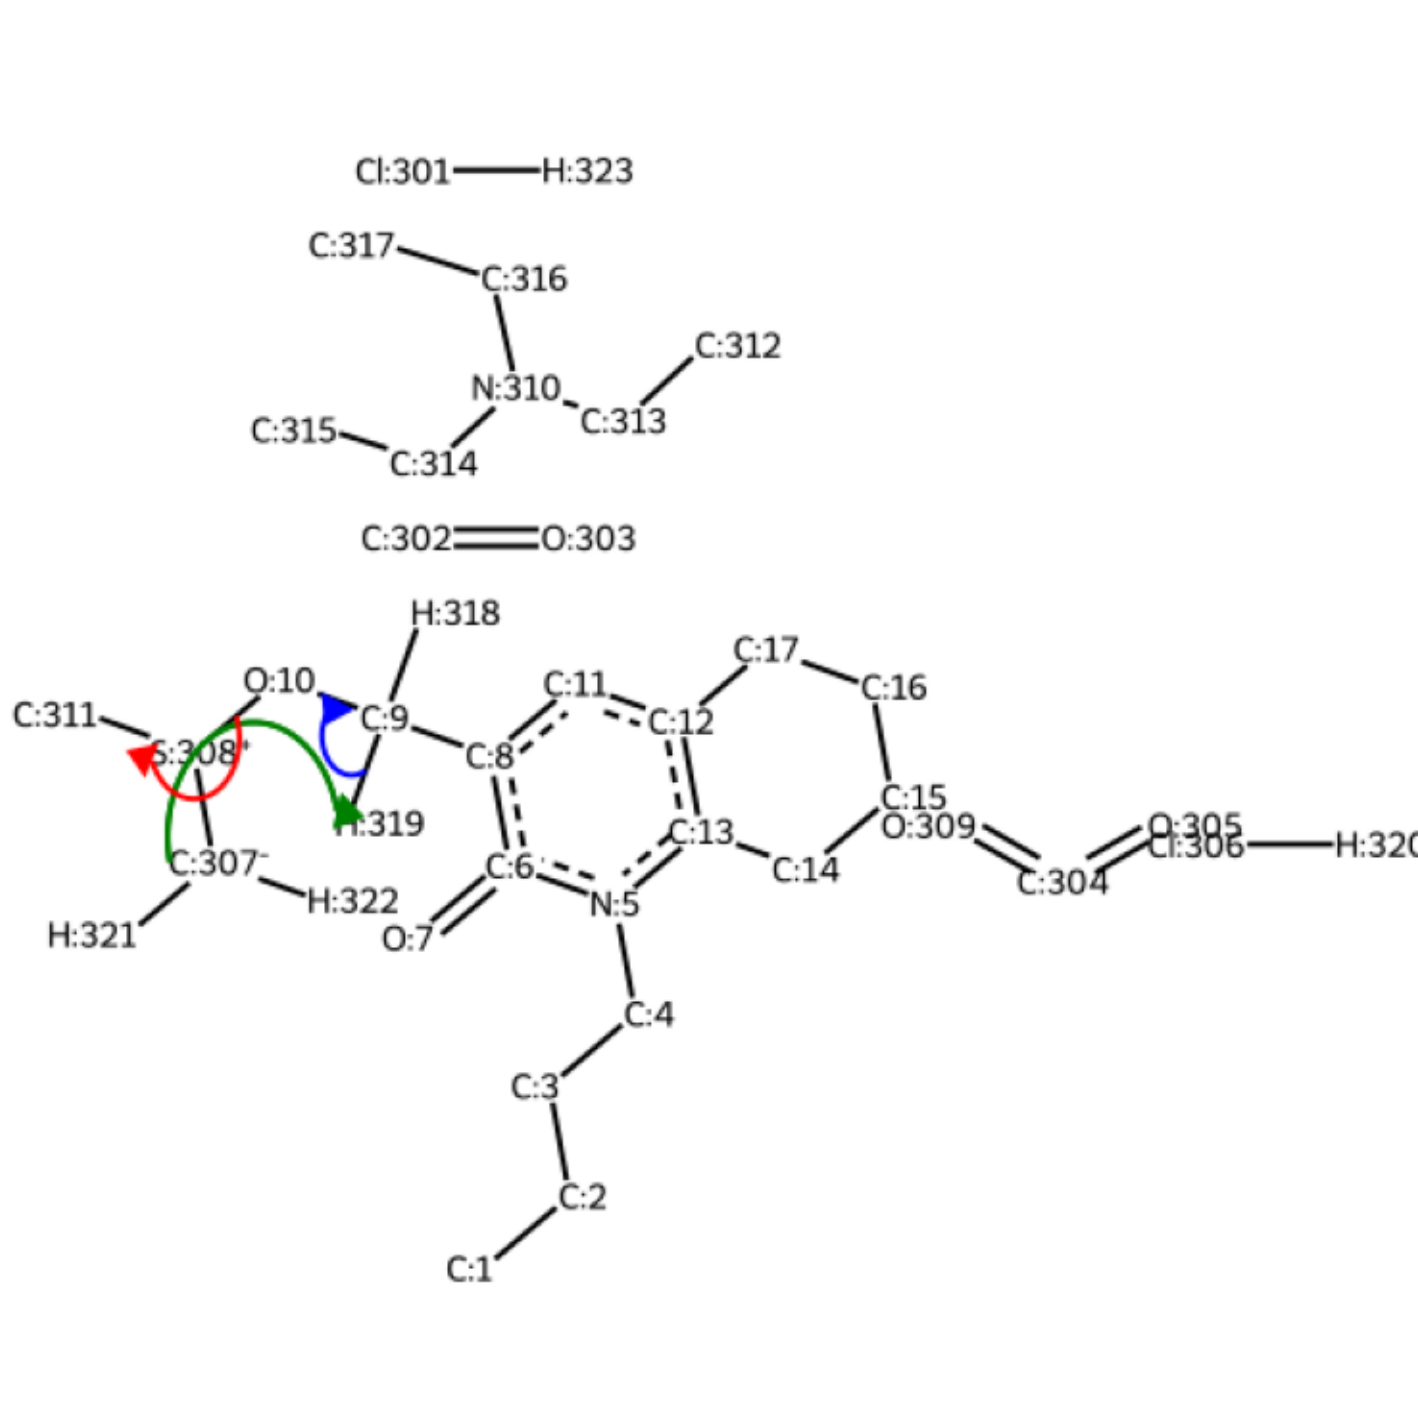

Product(s)

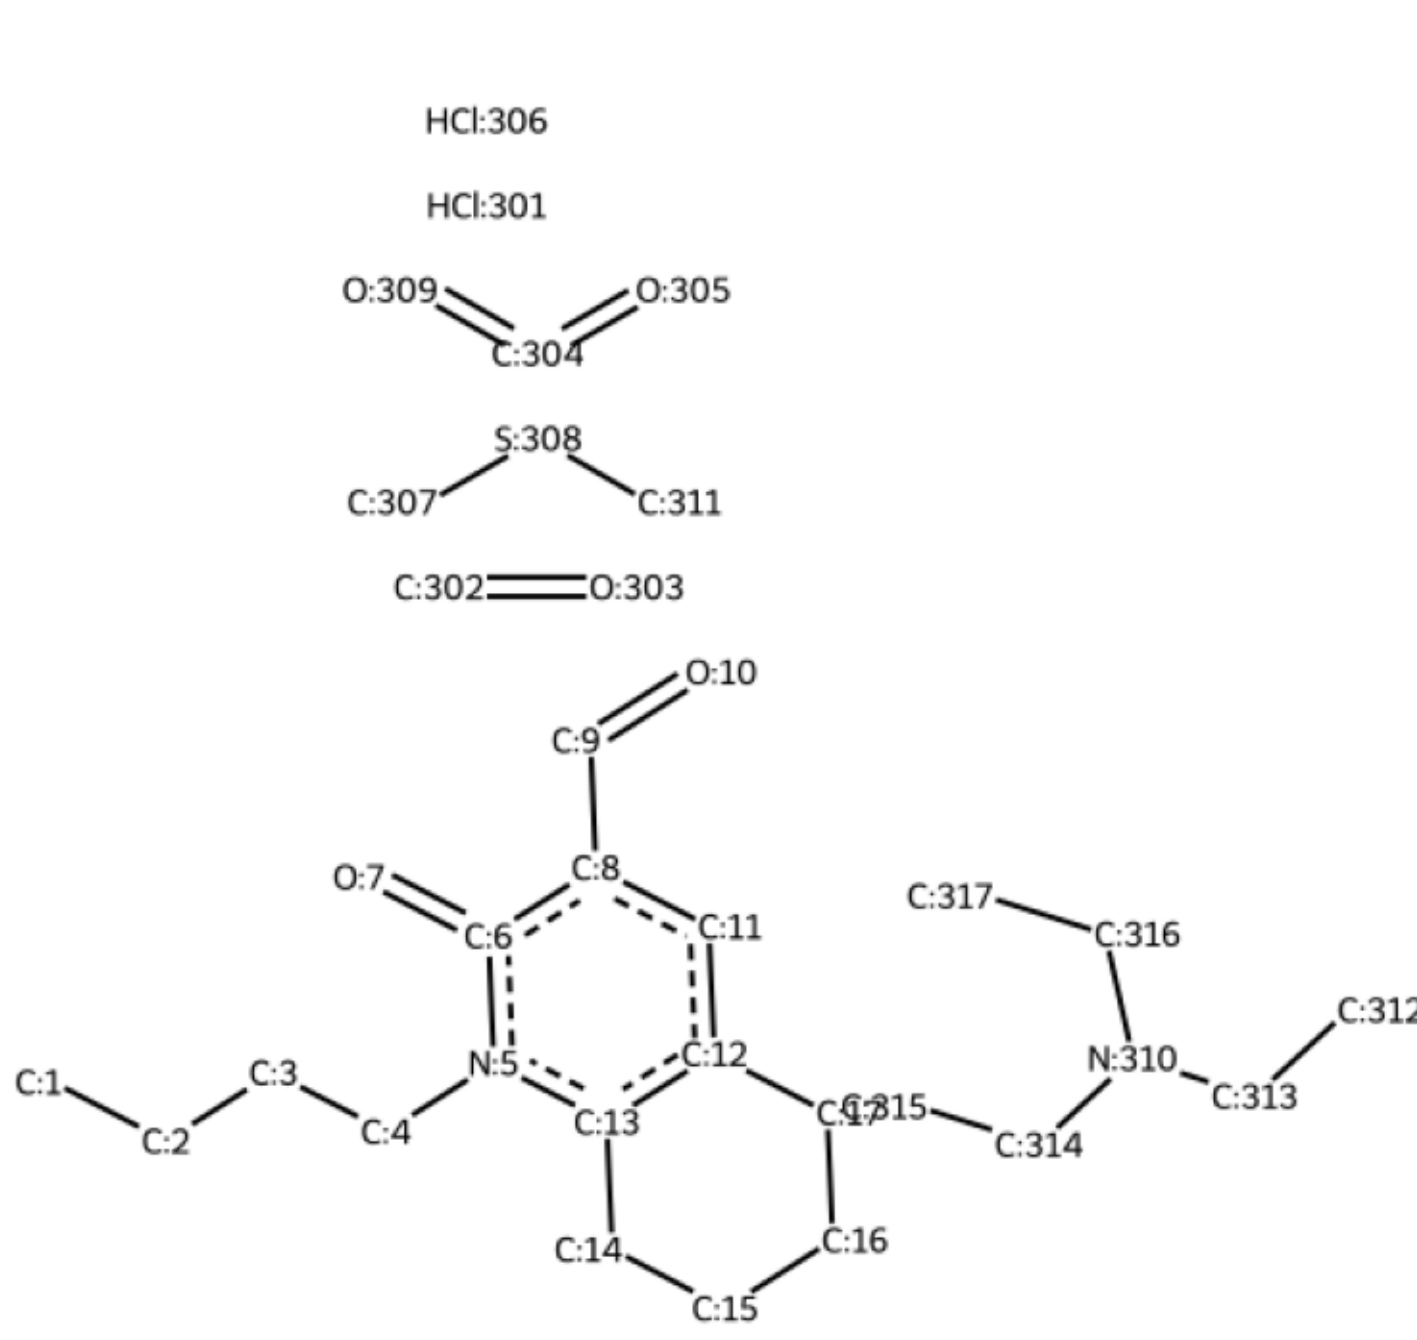



Original reaction  
sampled RXN\_ID:59)

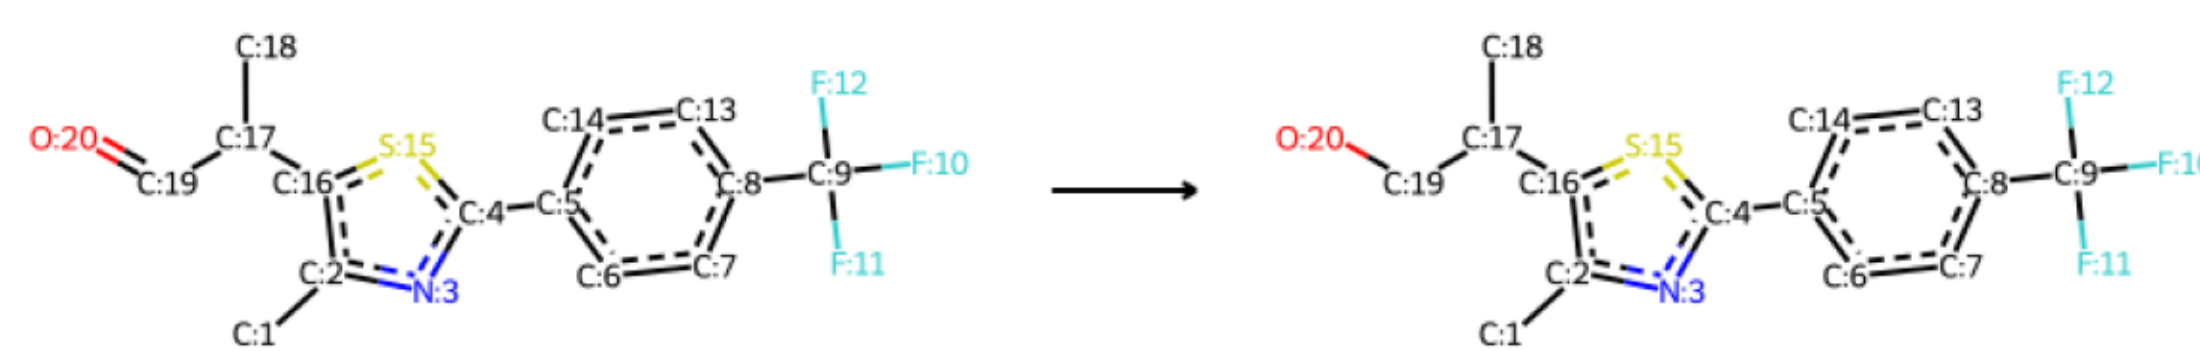

Identified mechanistic class -  
carbonyl\_reduction reaction

Reaction with missing reagents recovered

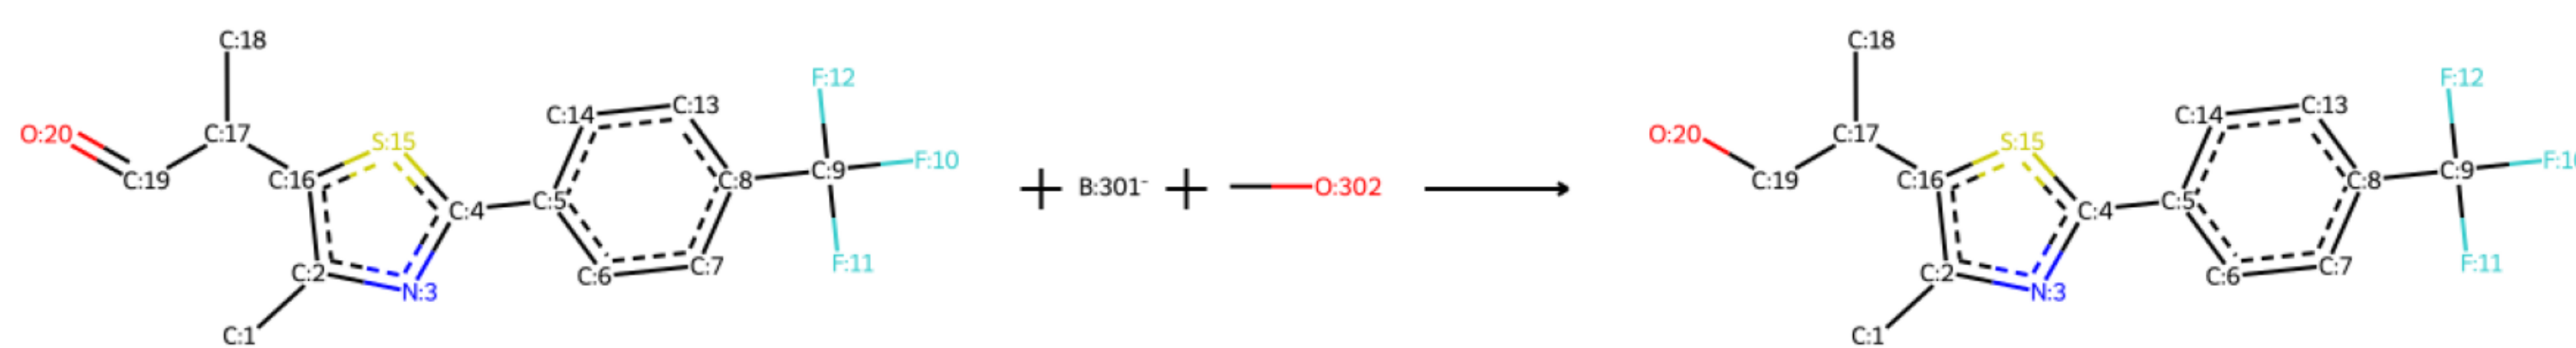

Proposed mechanistic pathway

[Arrow order: (1) green, (2) blue, (3) red, (4) orange]

step #1

step #2

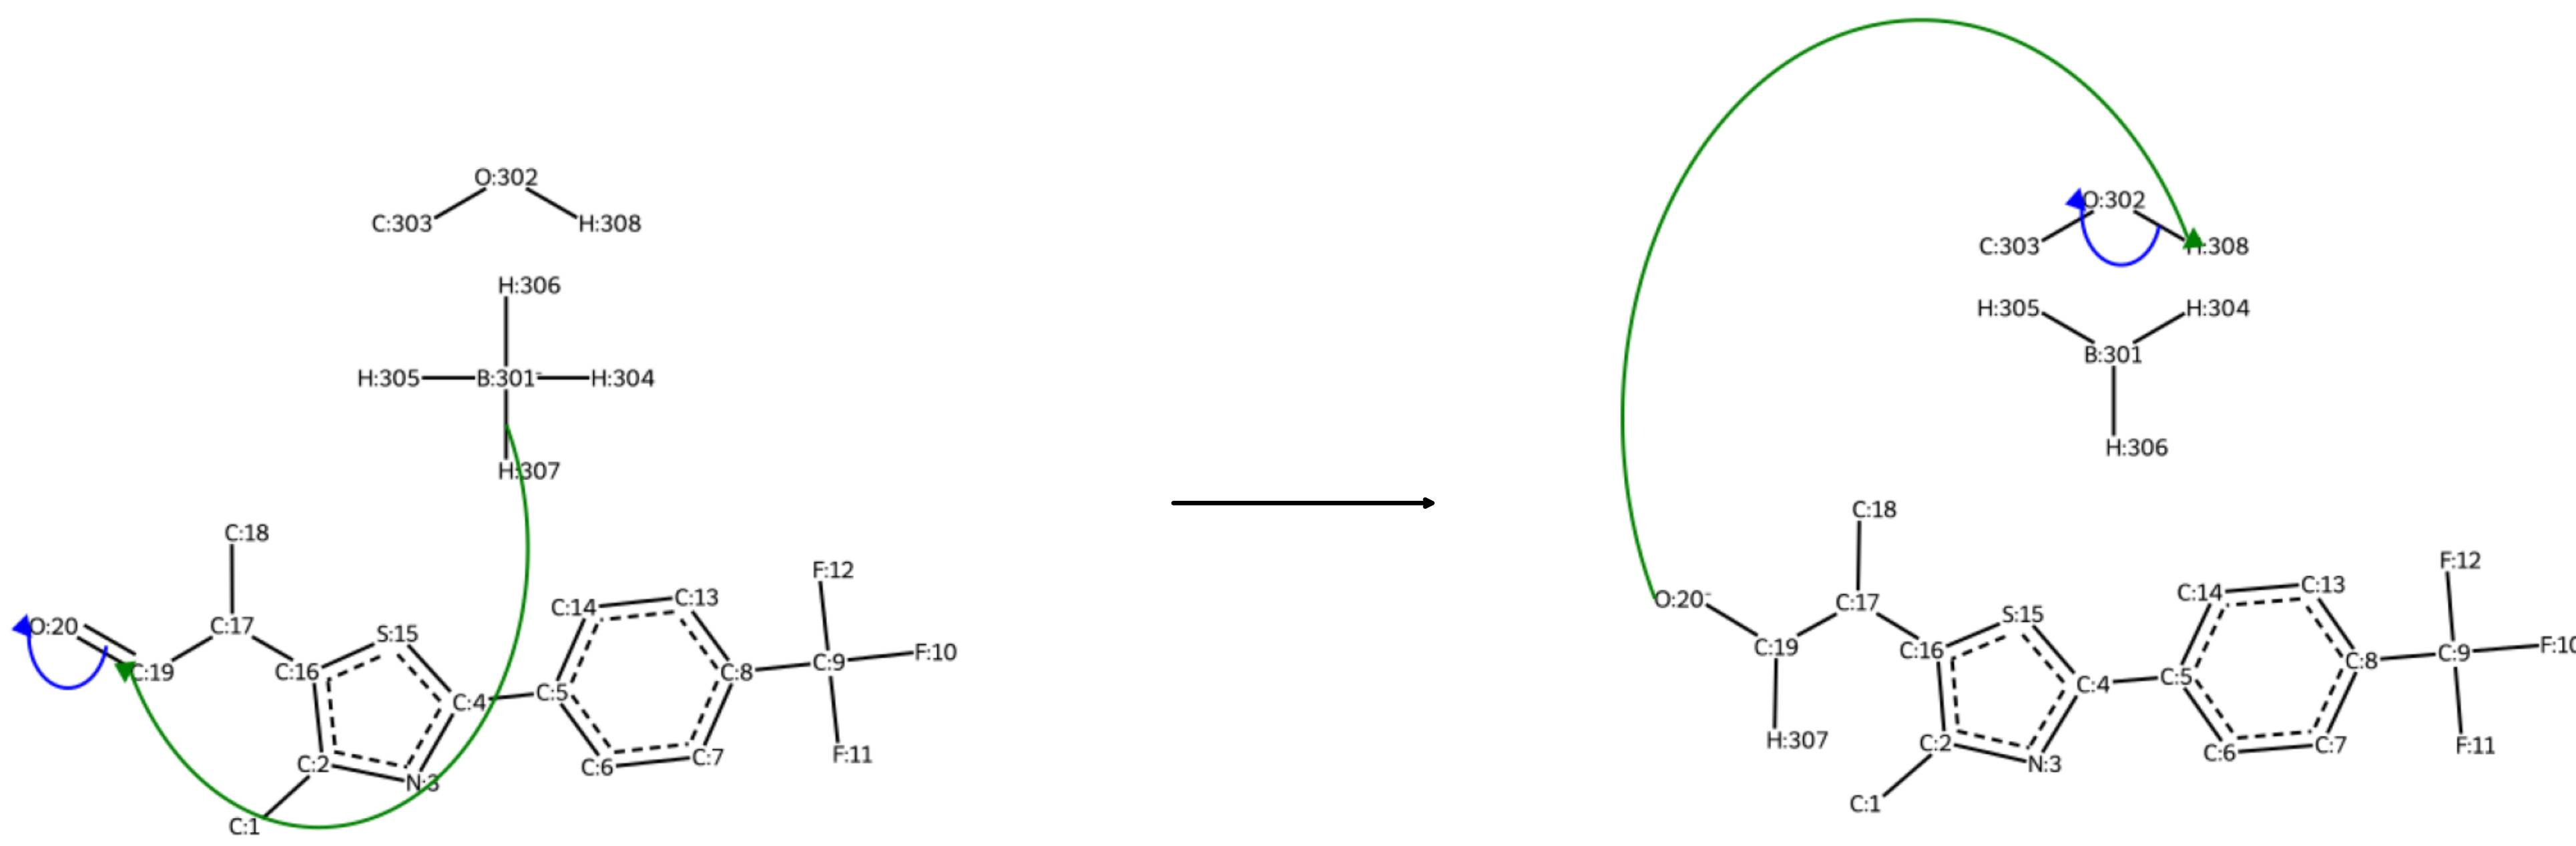

Product(s)

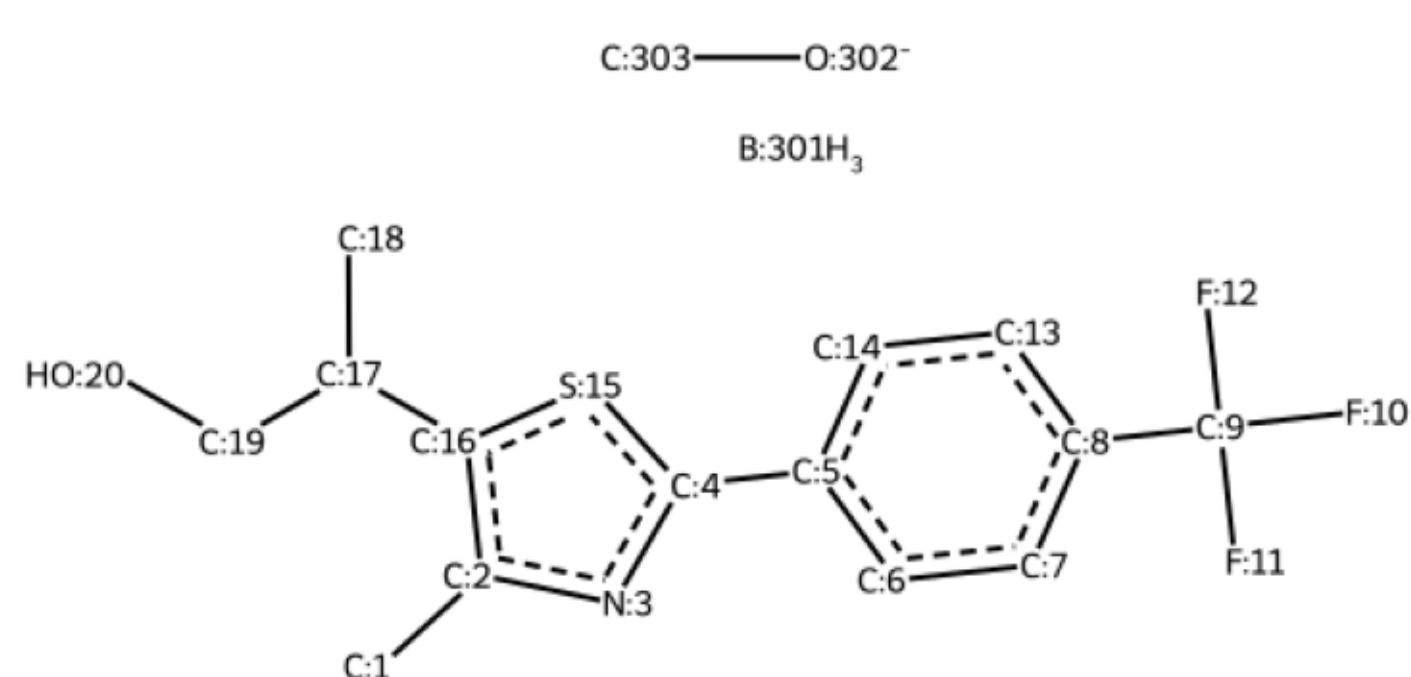



Original reaction  
sampled RXN\_ID:60)

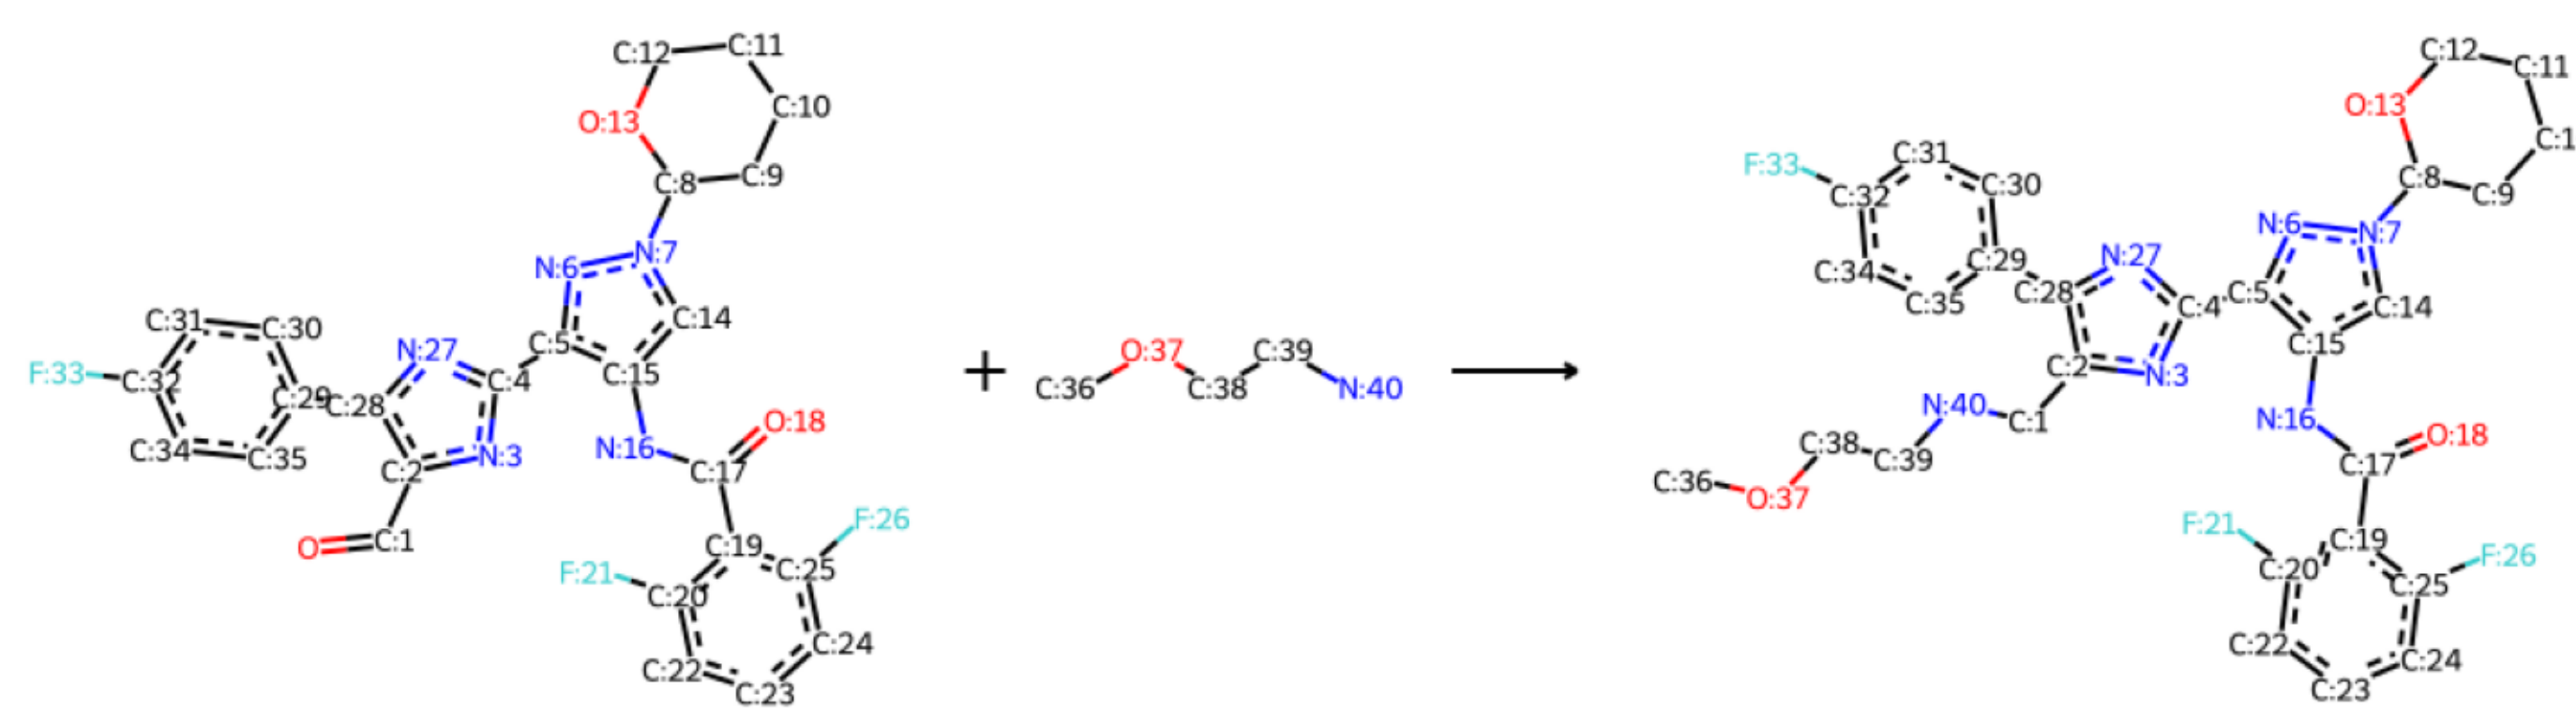

Identified mechanistic class -  
reductive\_amination reaction

Reaction with missing reagents recovered

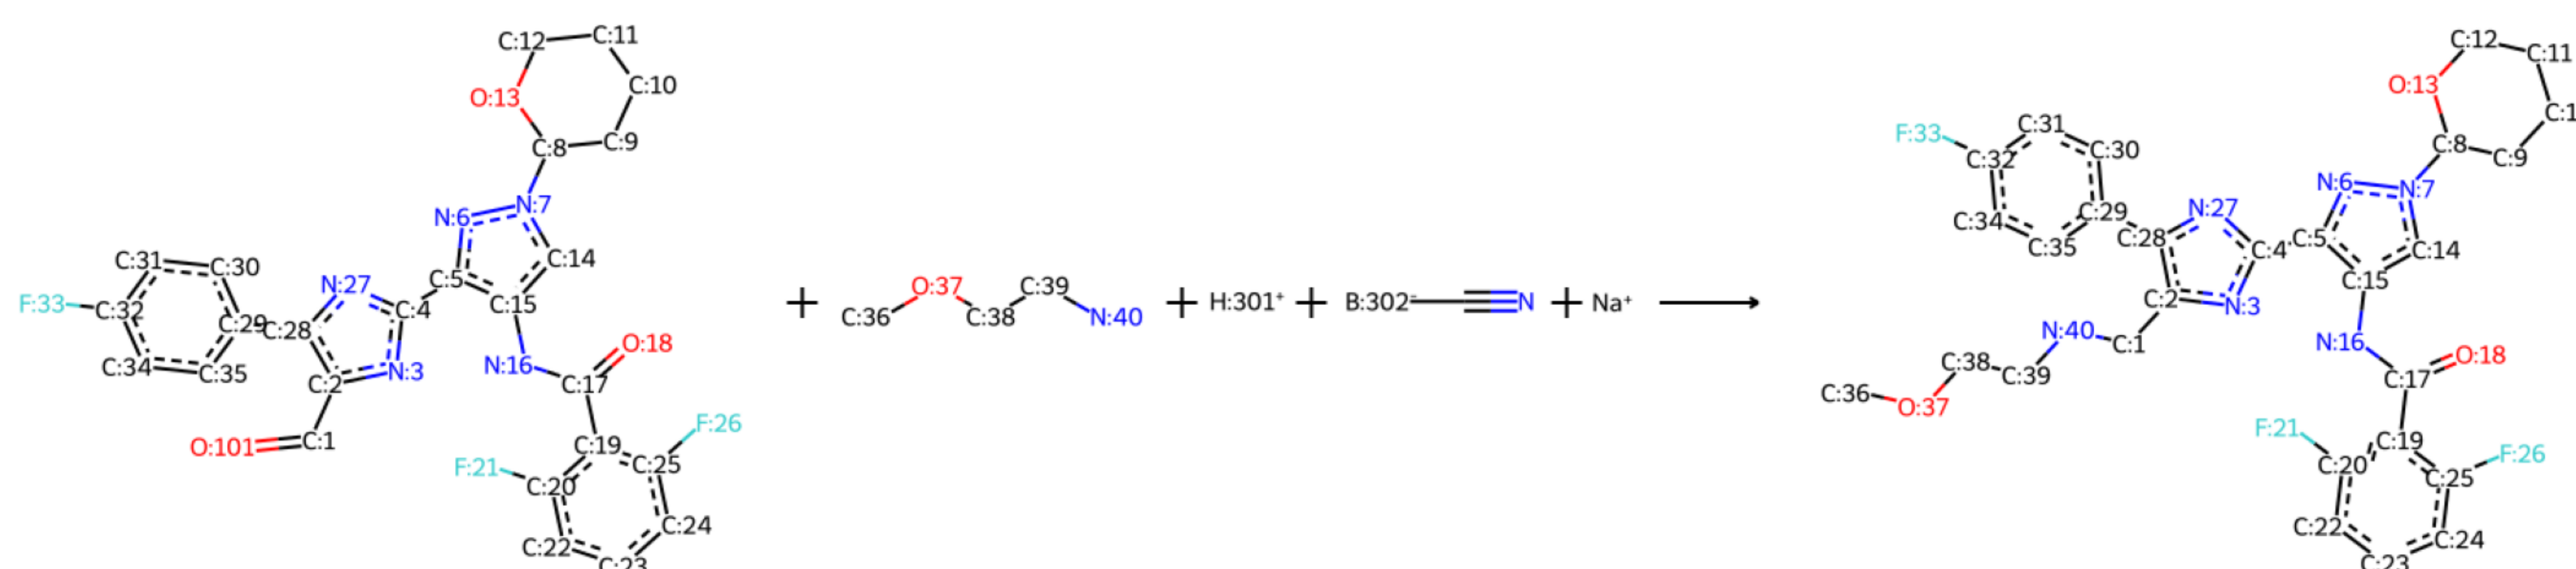

Proposed mechanistic pathway

[Arrow order: (1) green, (2) blue, (3) red, (4) orange]

step #1

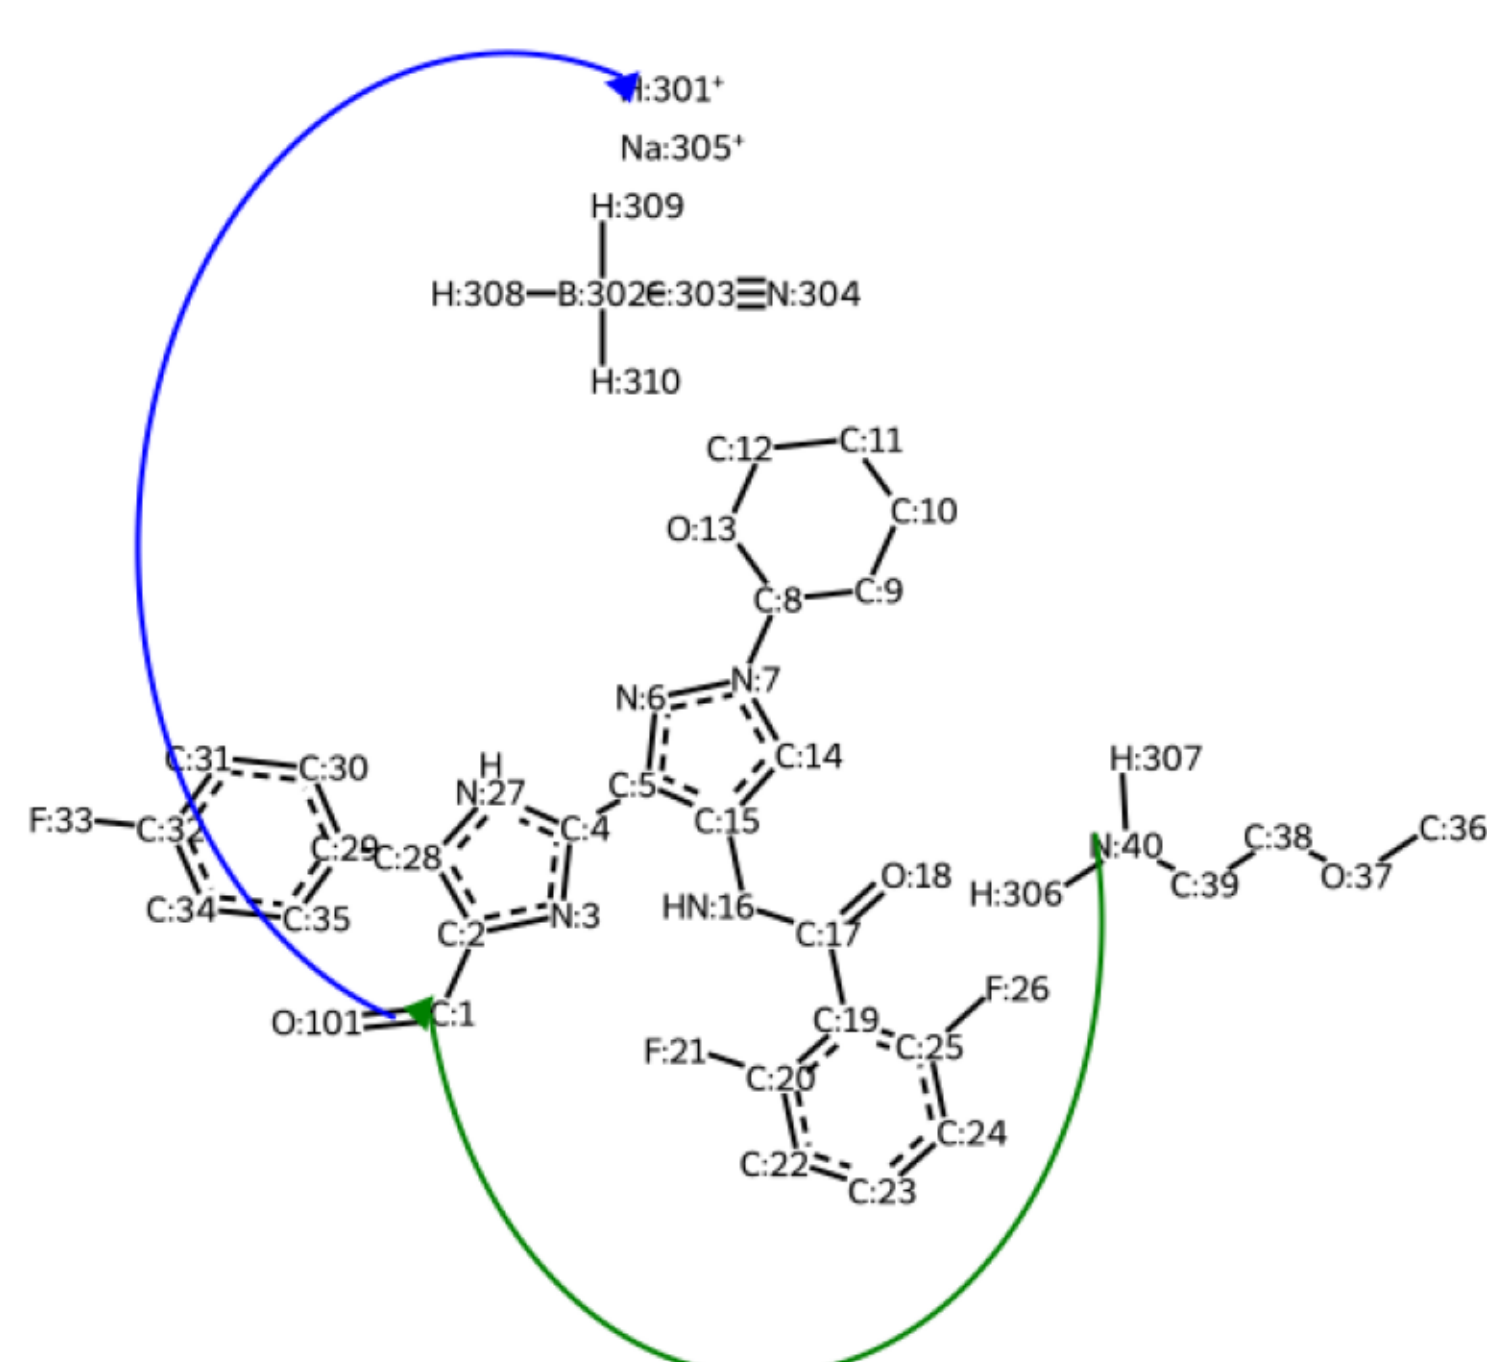

step #2

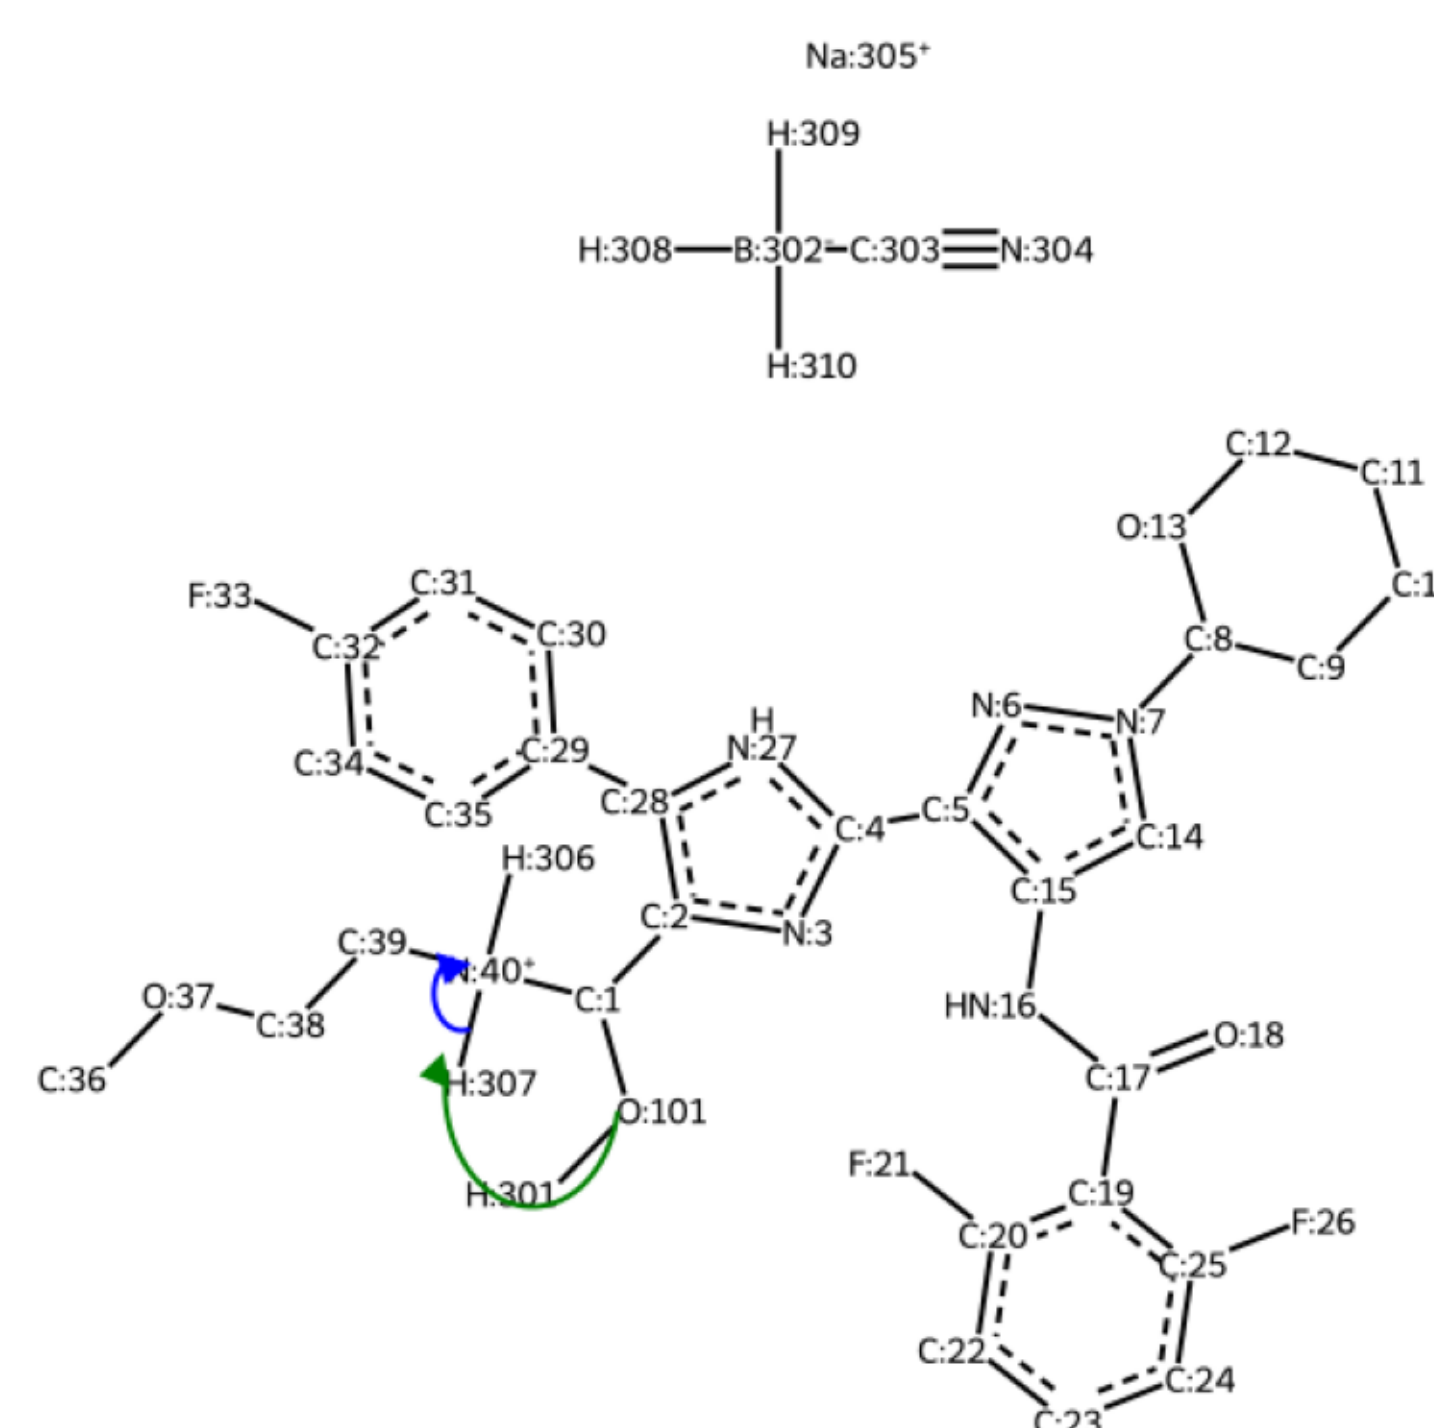

step #3

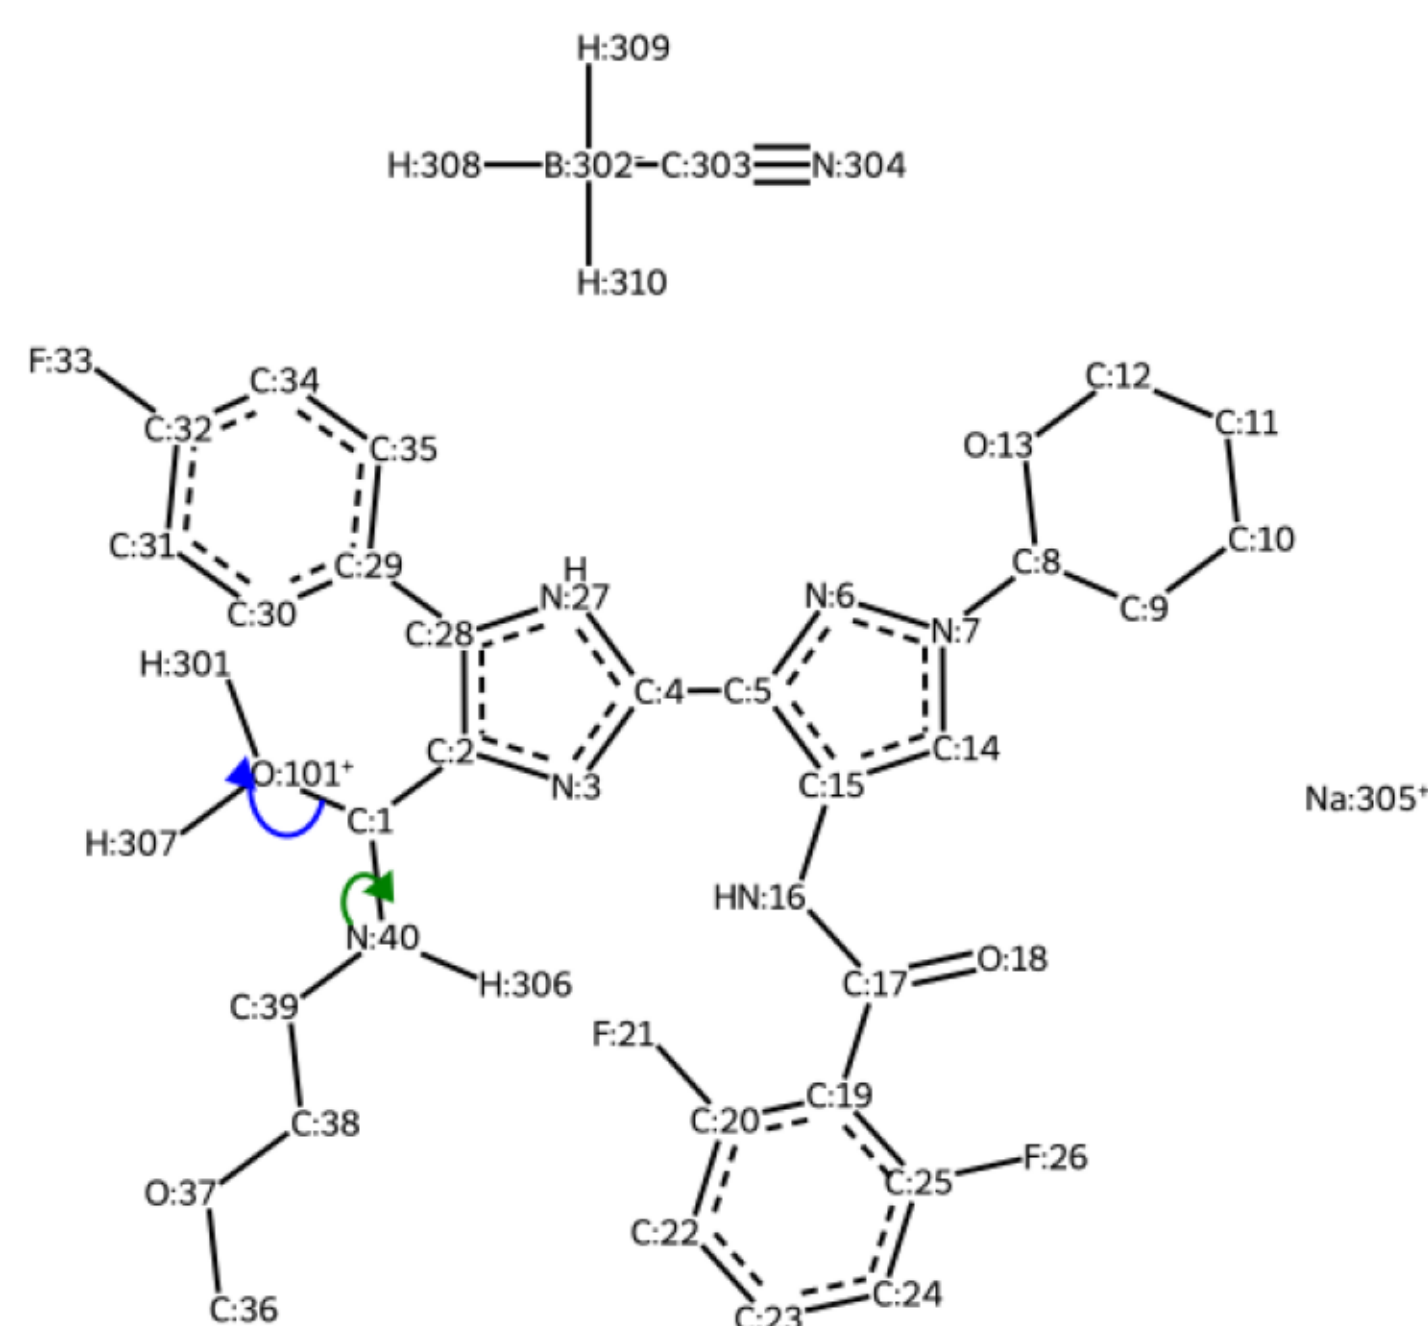

step #4

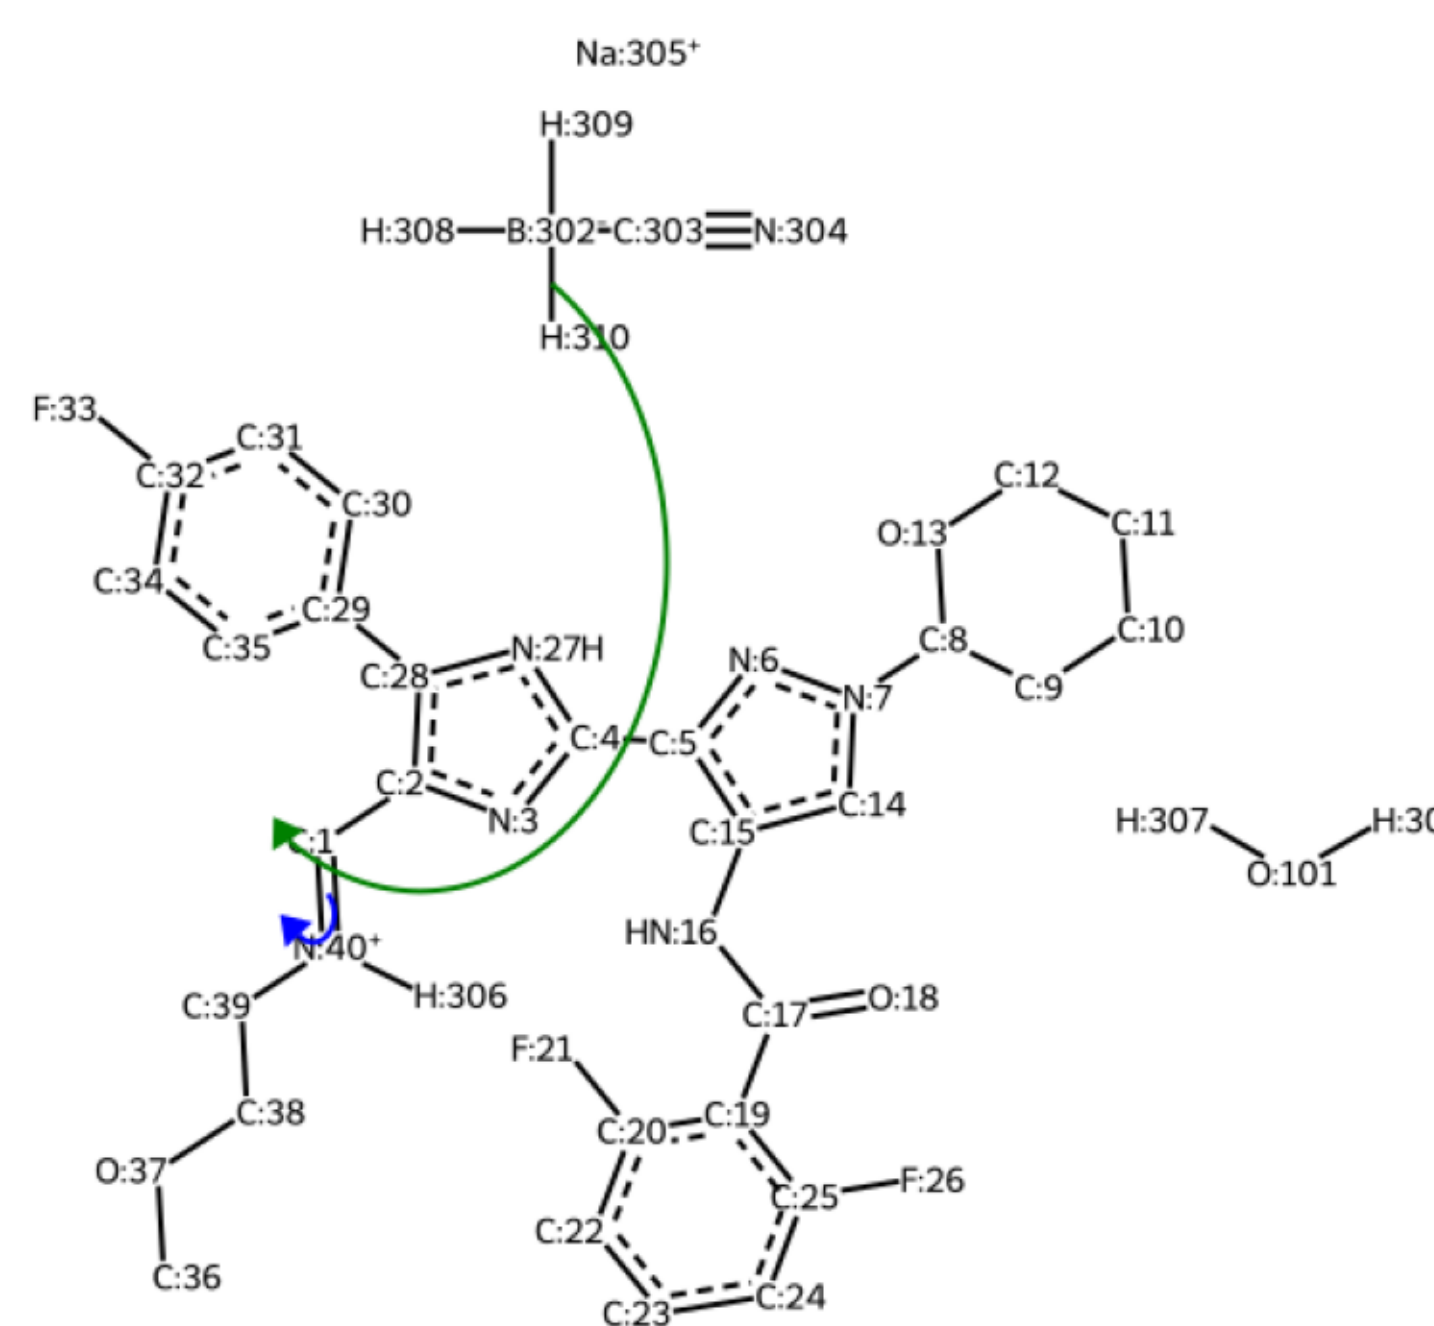

Product(s)

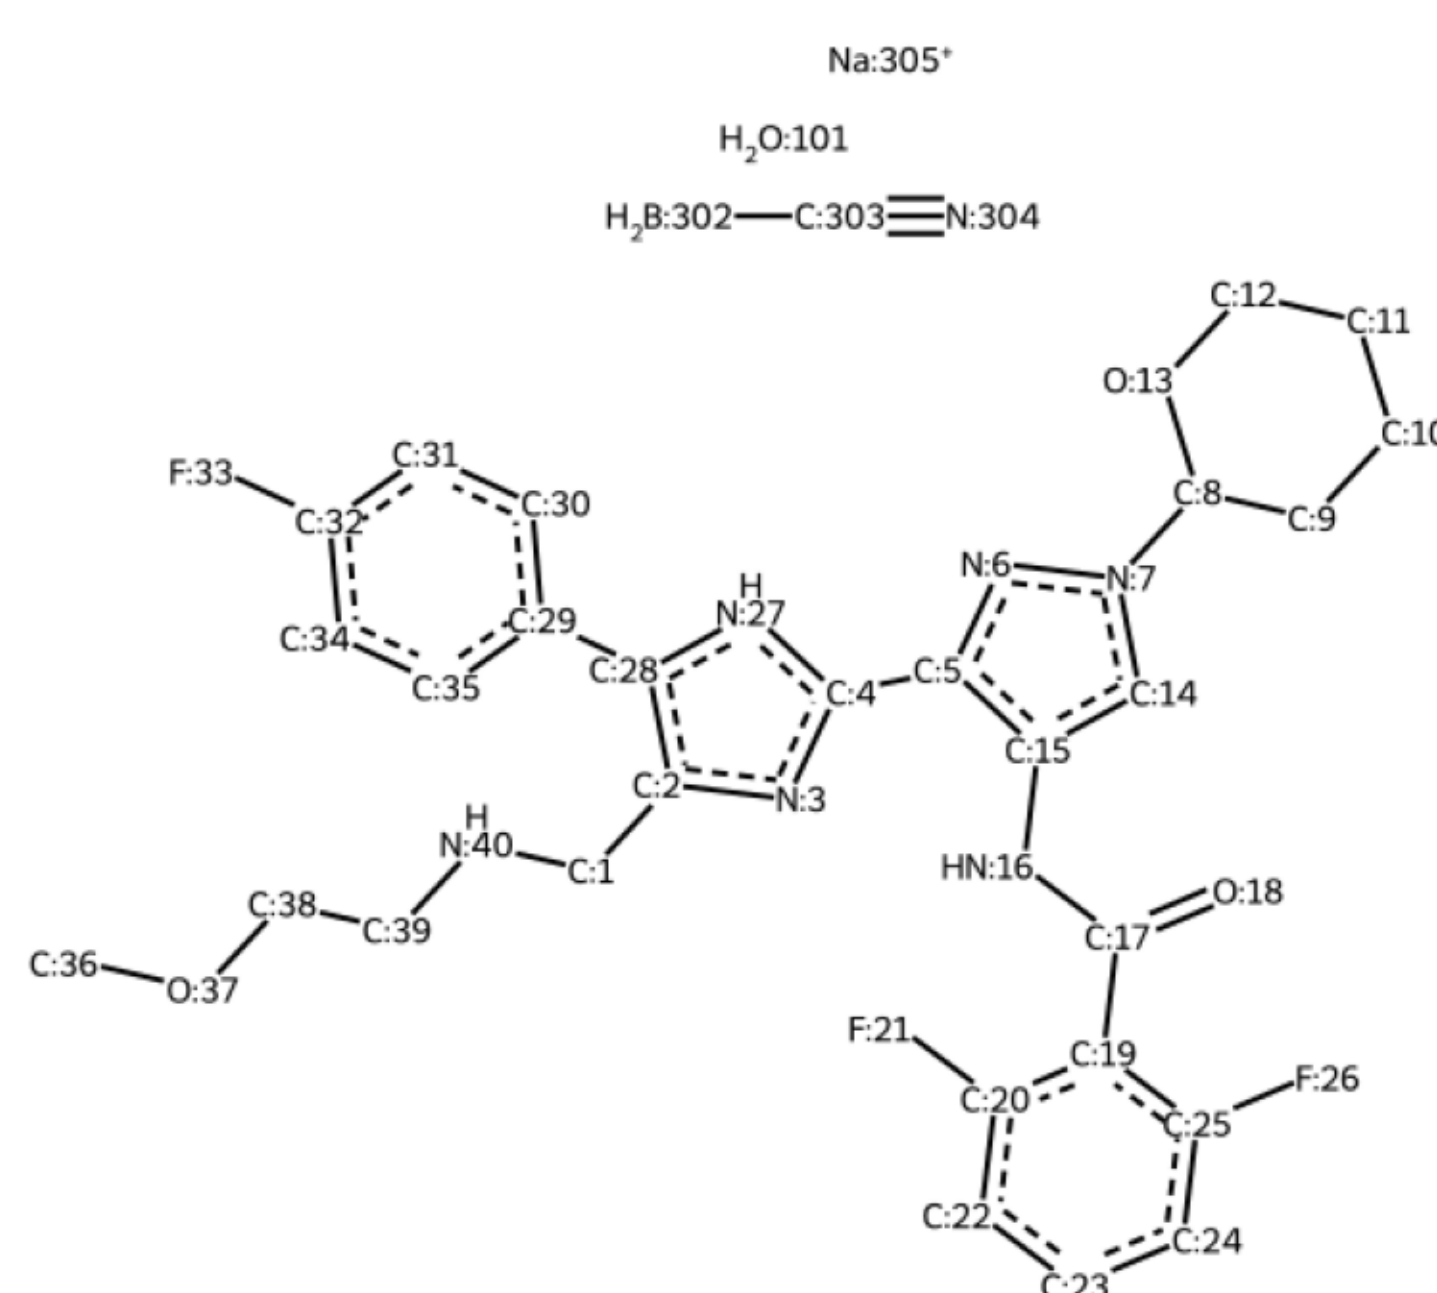



Original reaction  
sampled RXN\_ID:61)

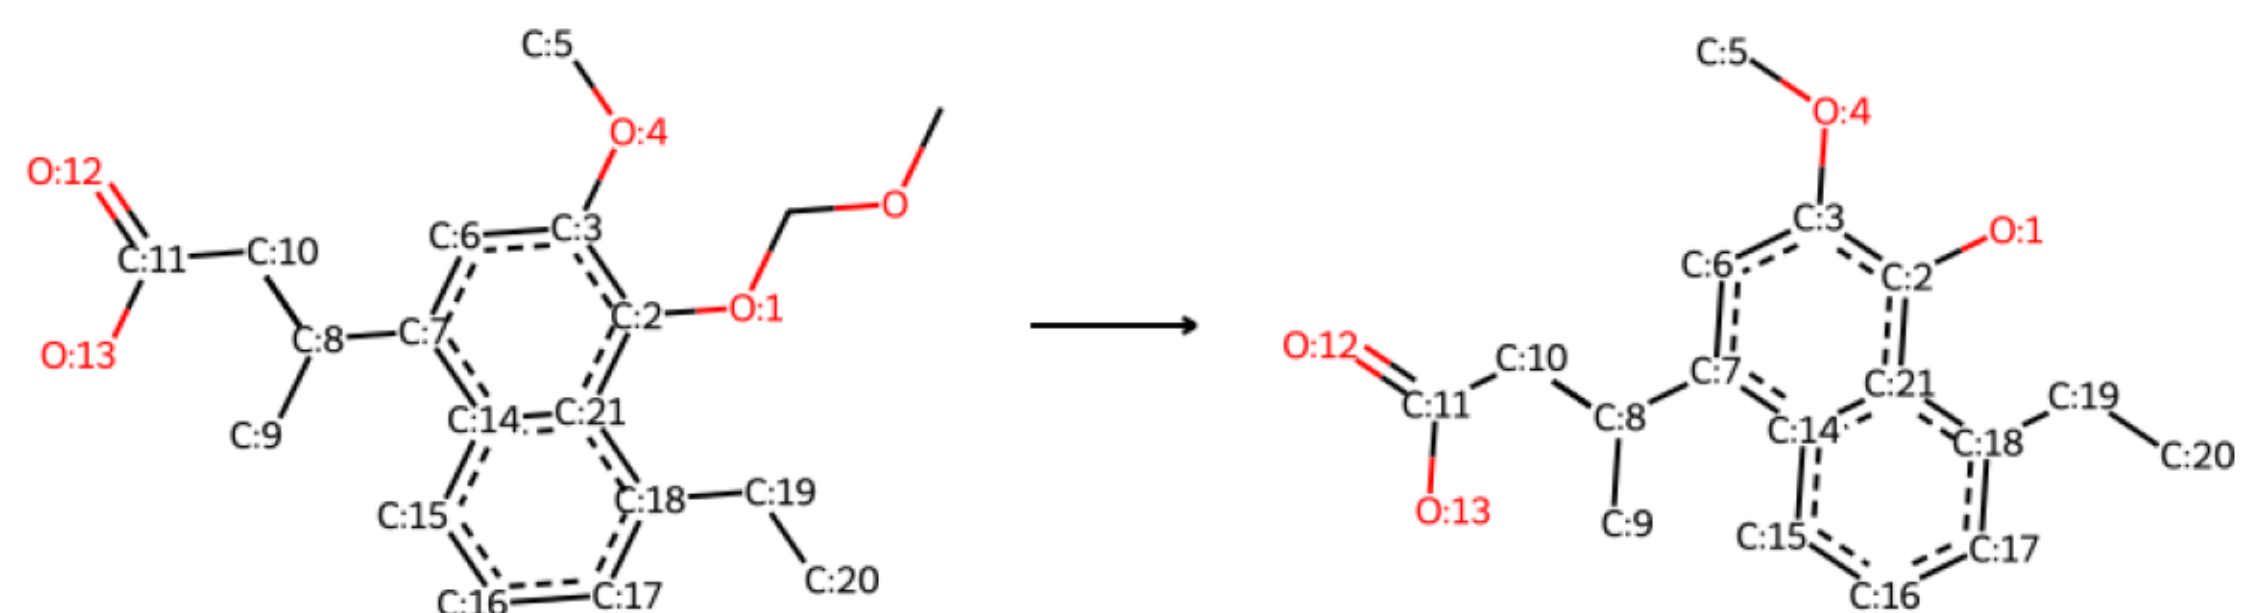

Identified mechanistic class -  
(hemi)acetal(aminal)\_hydrolysis reaction

Reaction with missing reagents recovered

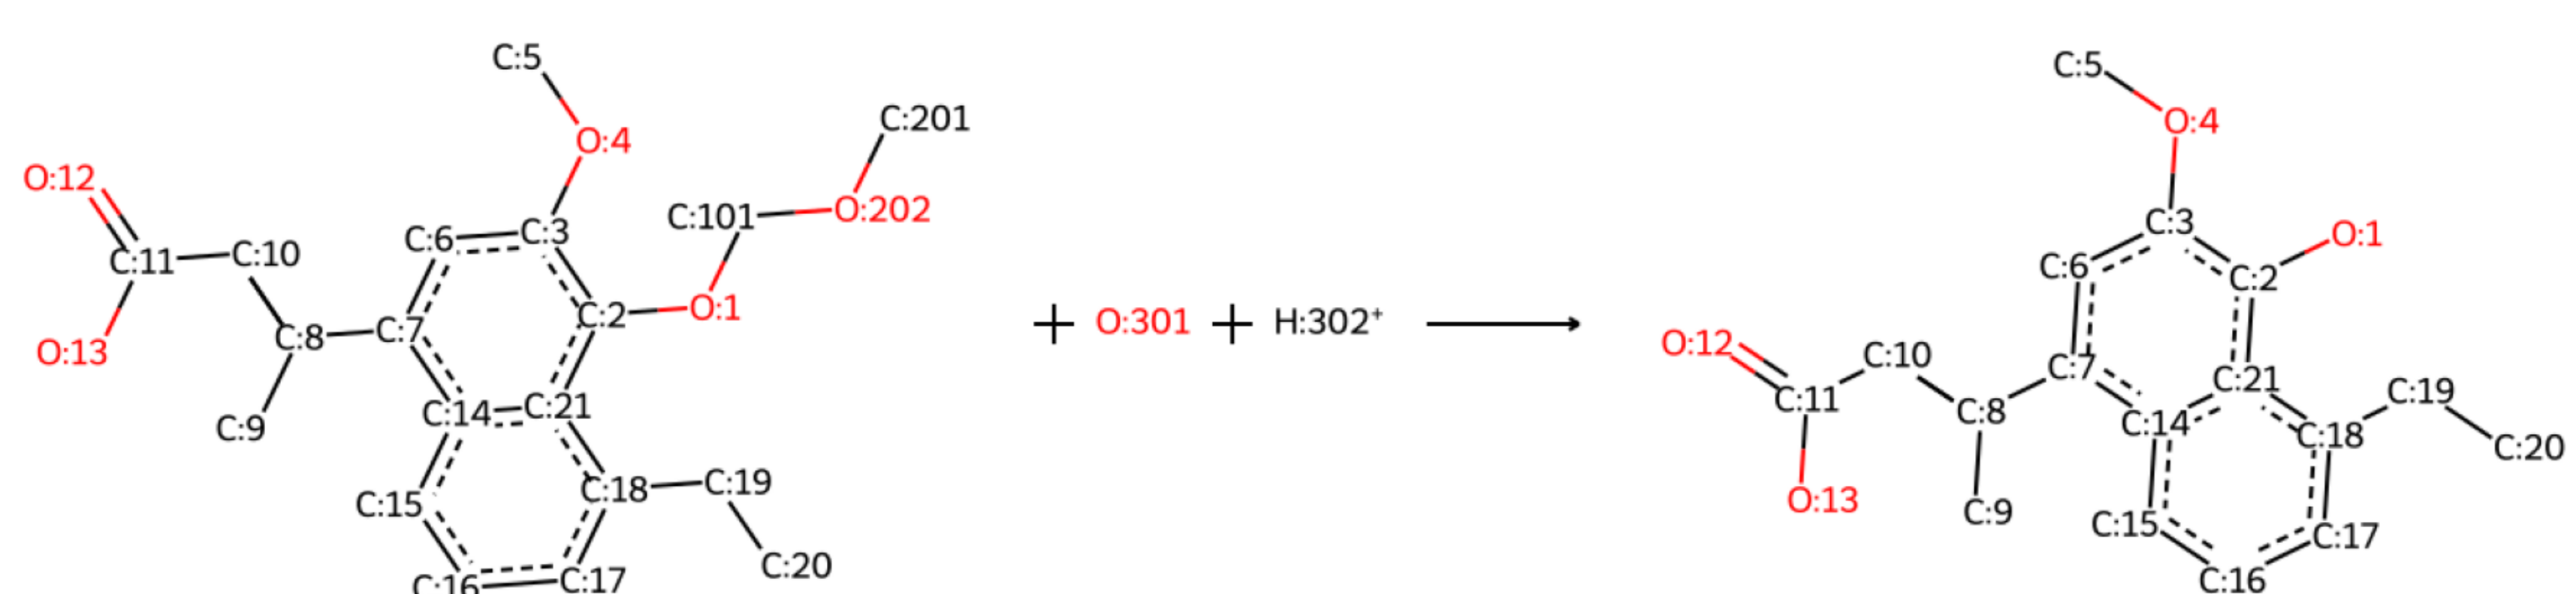

Proposed mechanistic pathway

[Arrow order: (1) green, (2) blue, (3) red, (4) orange]

step #1

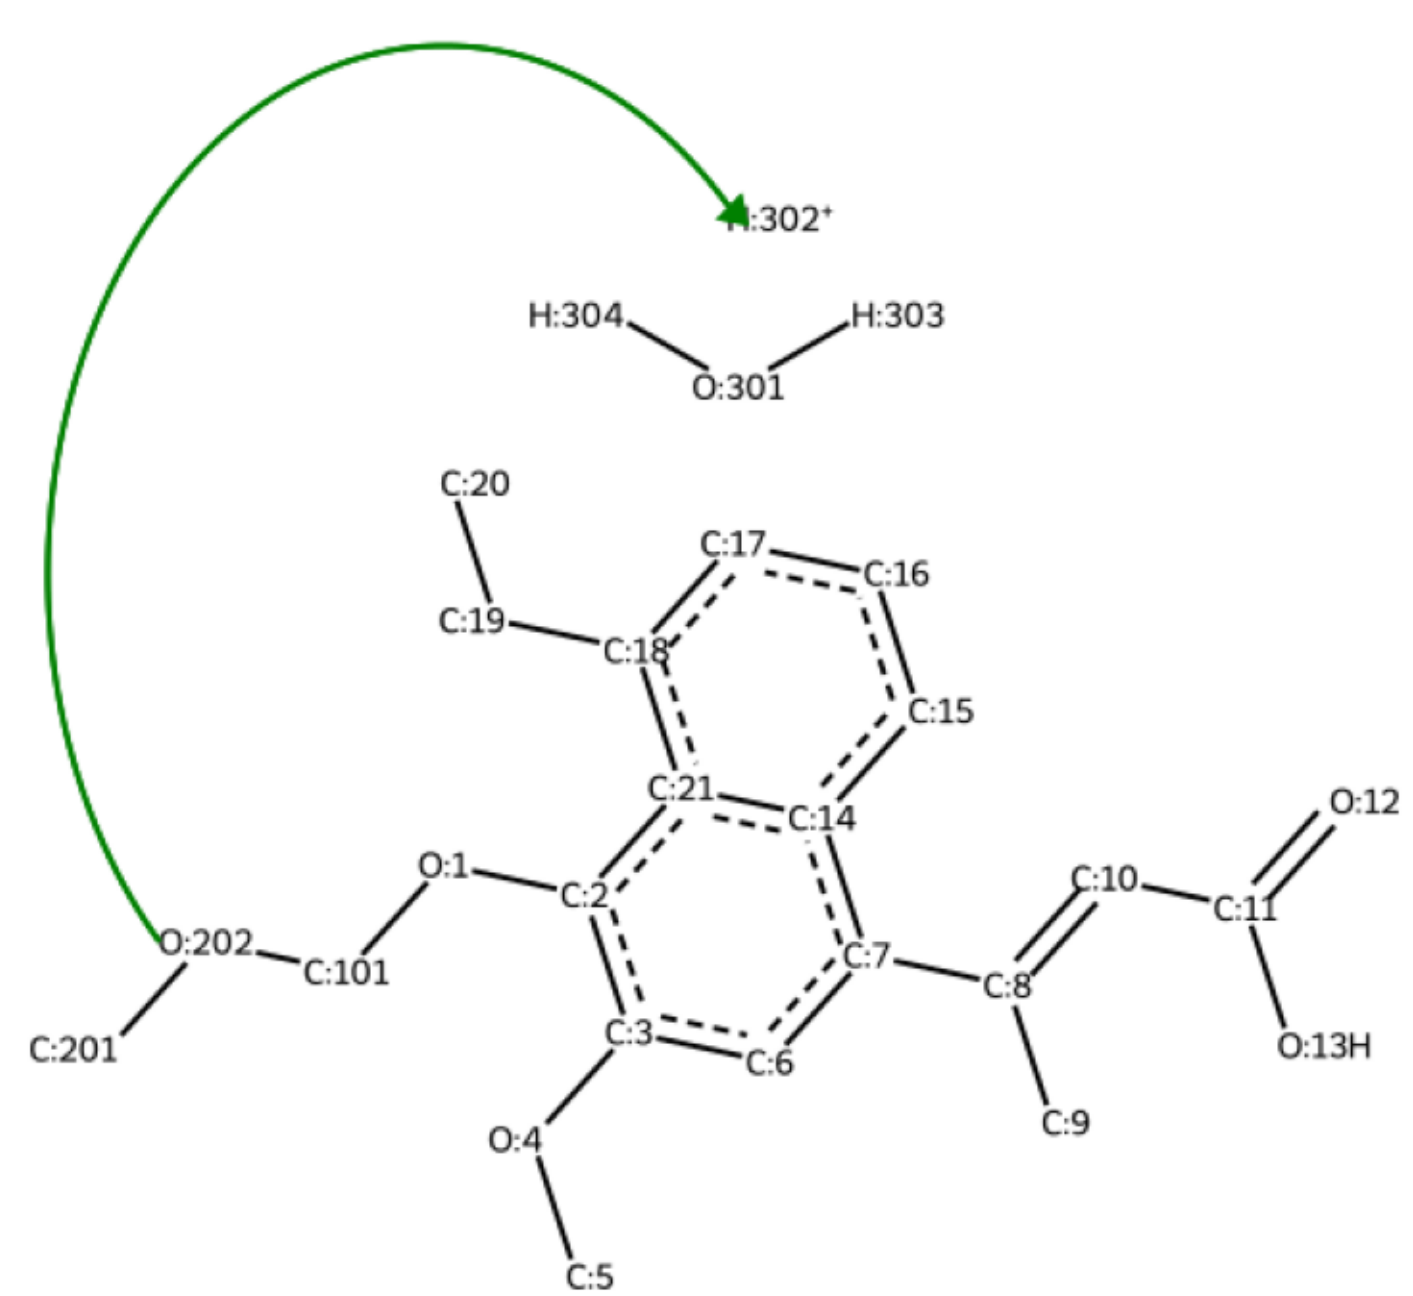

step #2

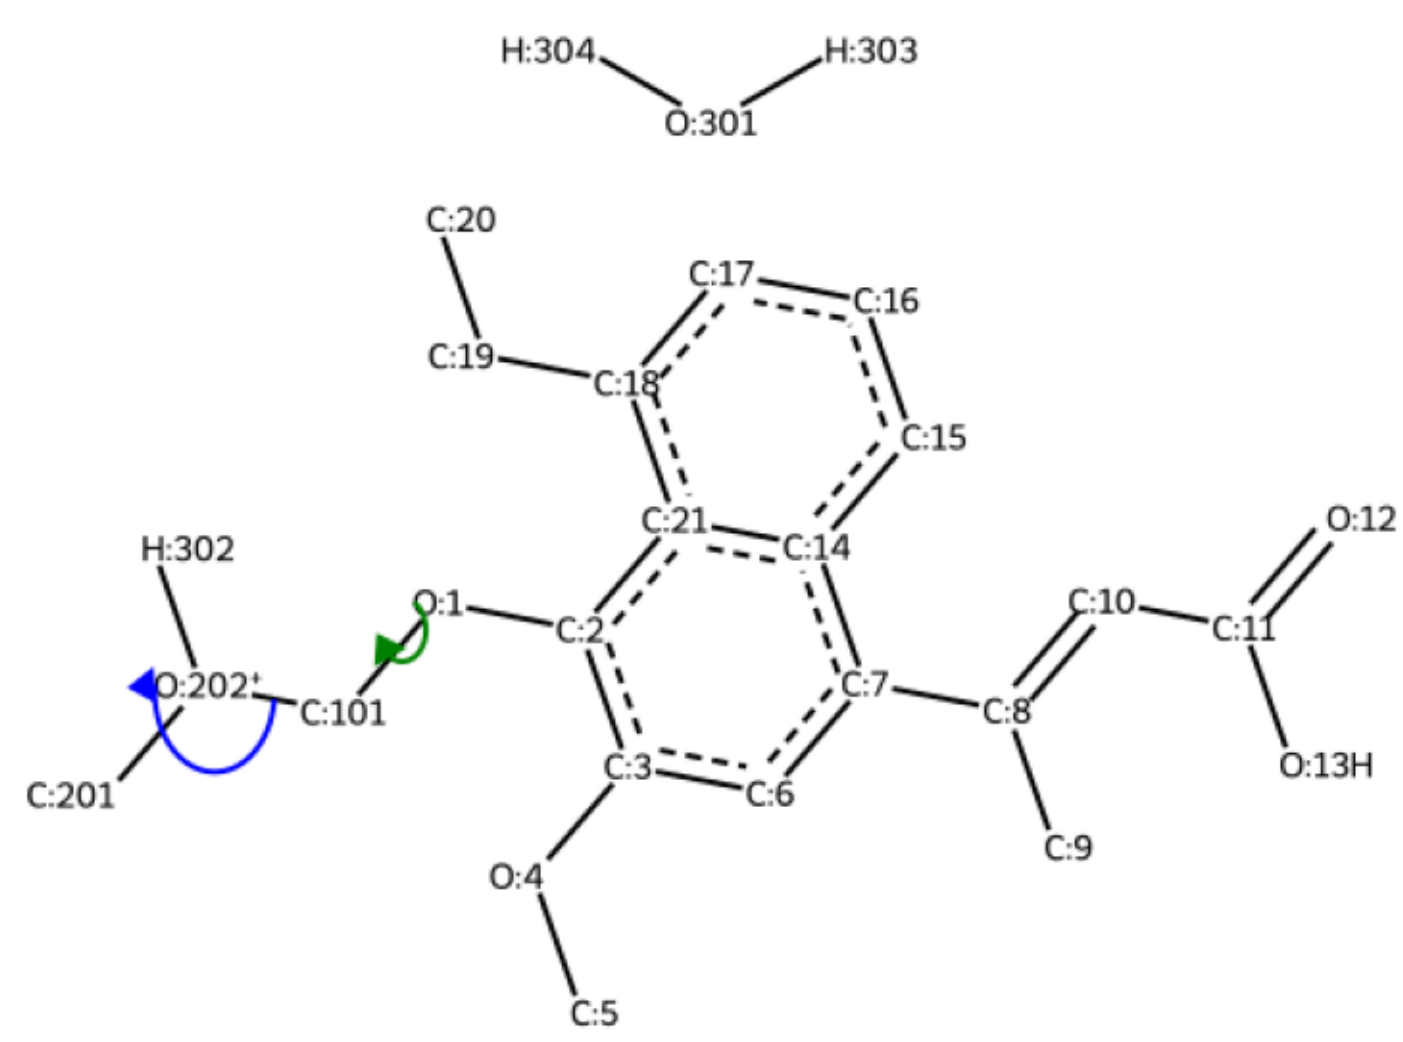

step #3

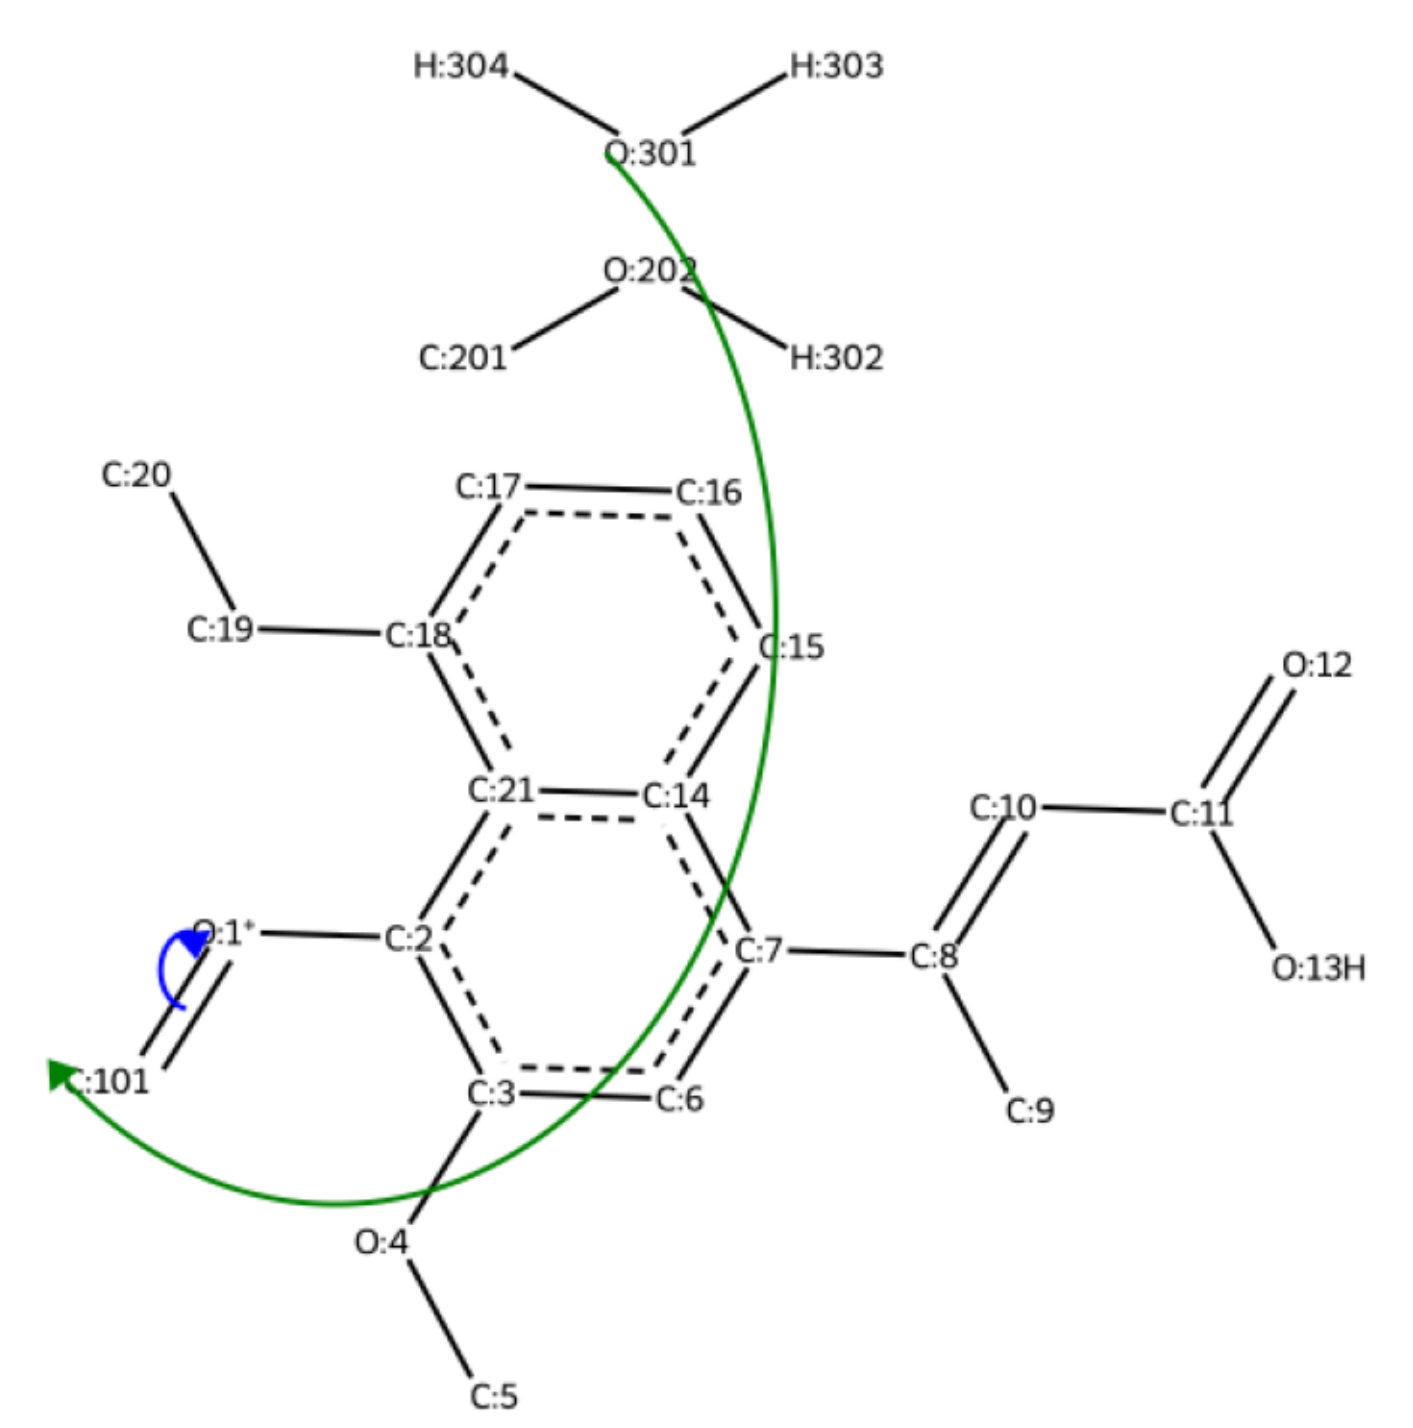

step #4

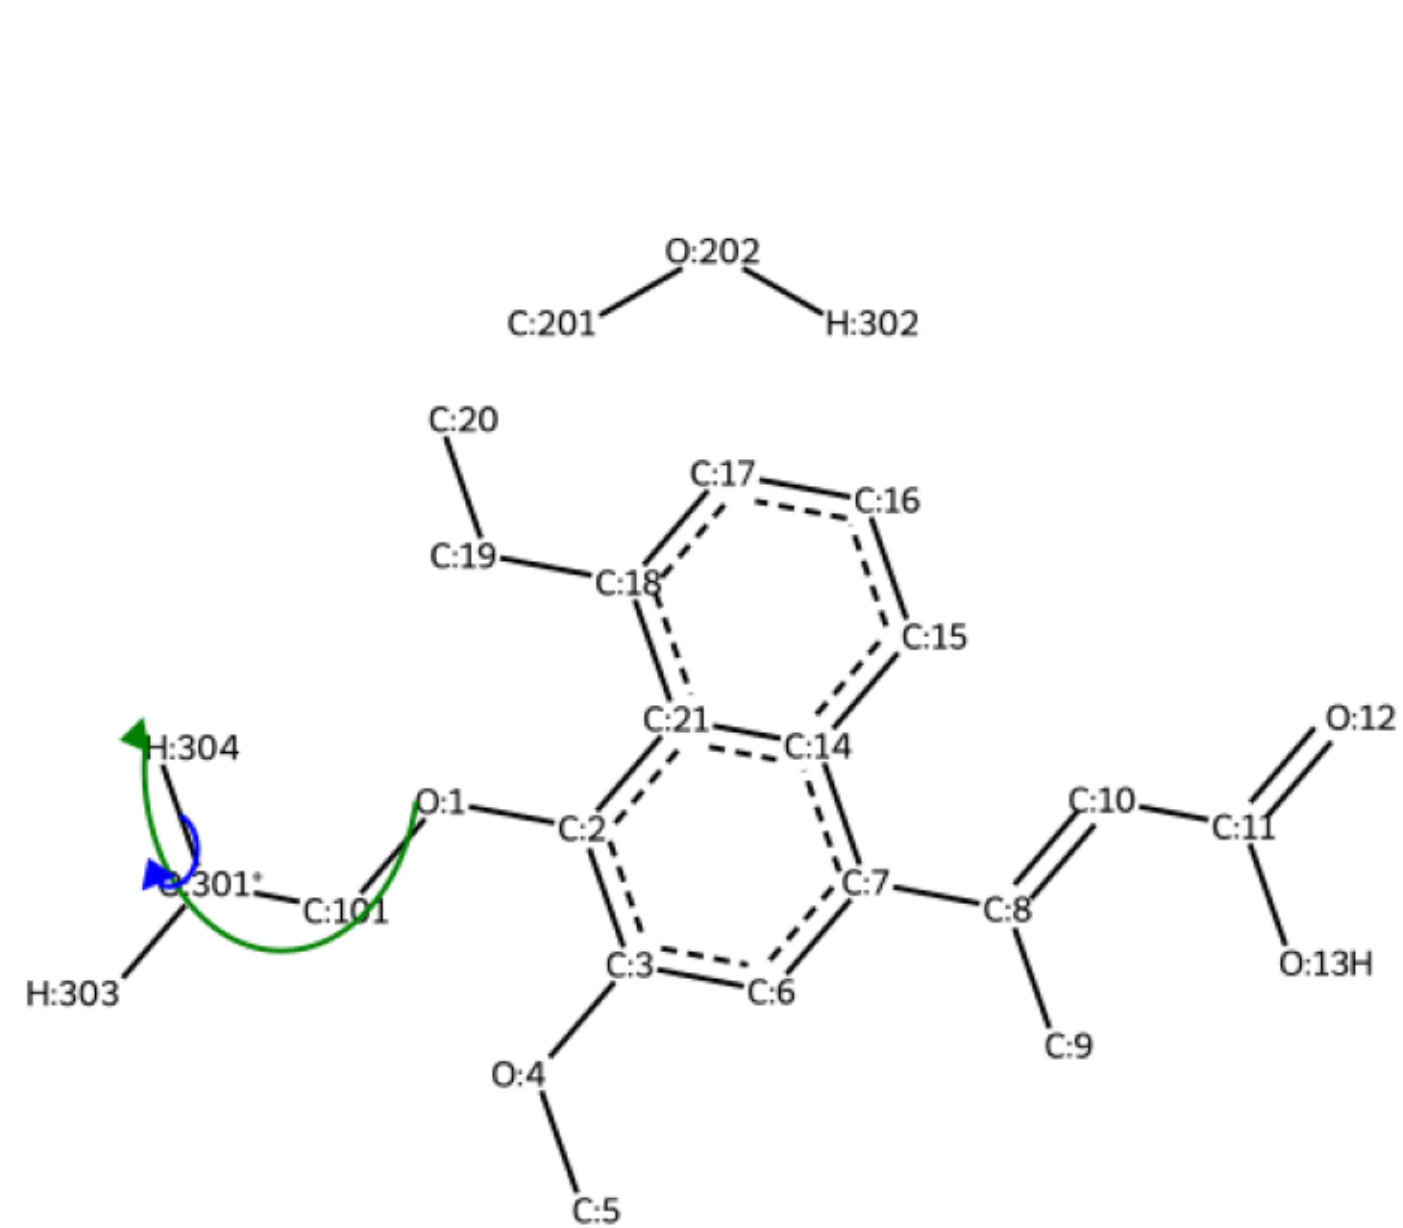

step #5

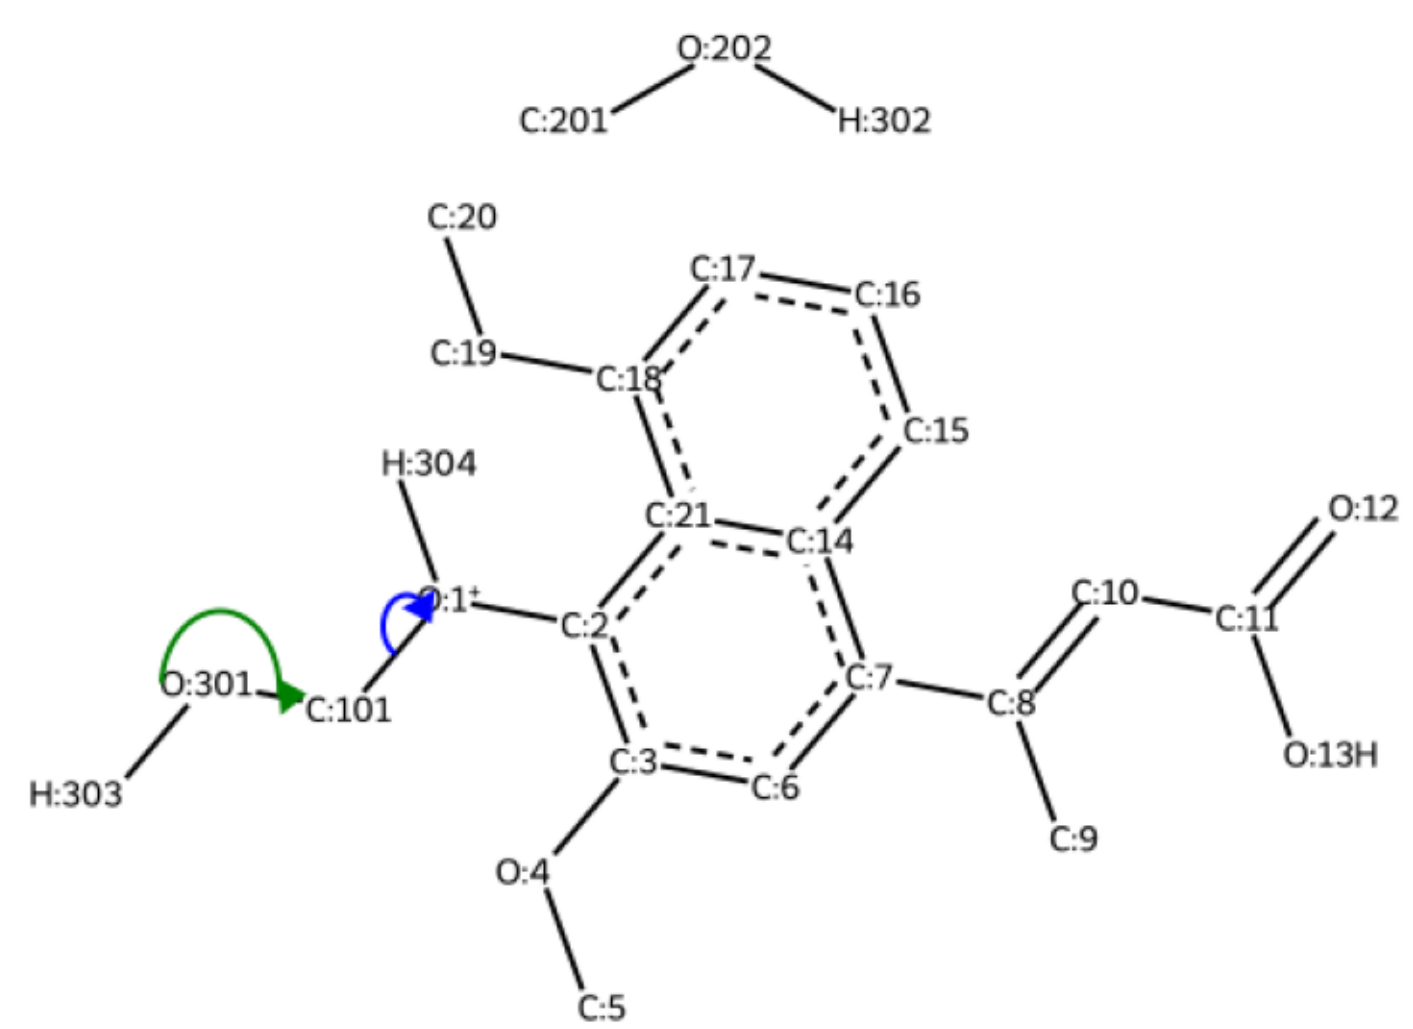

step #6

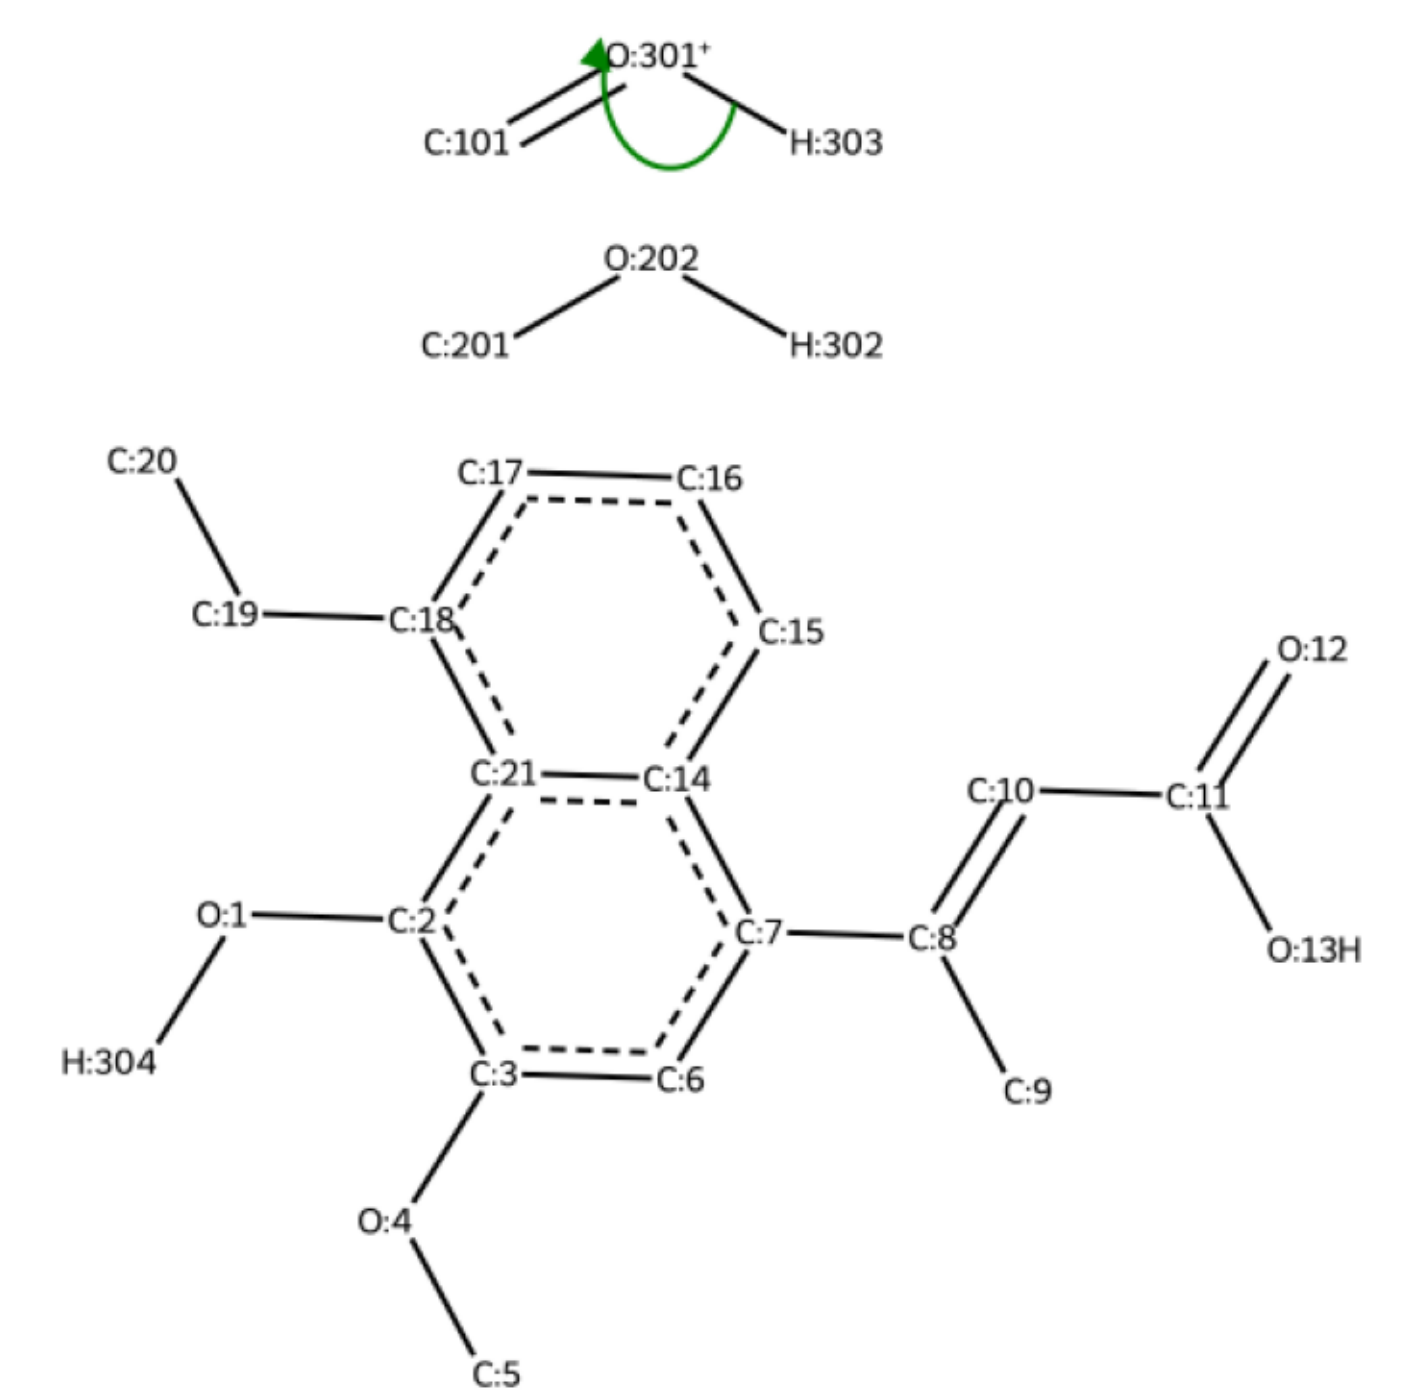

Product(s)

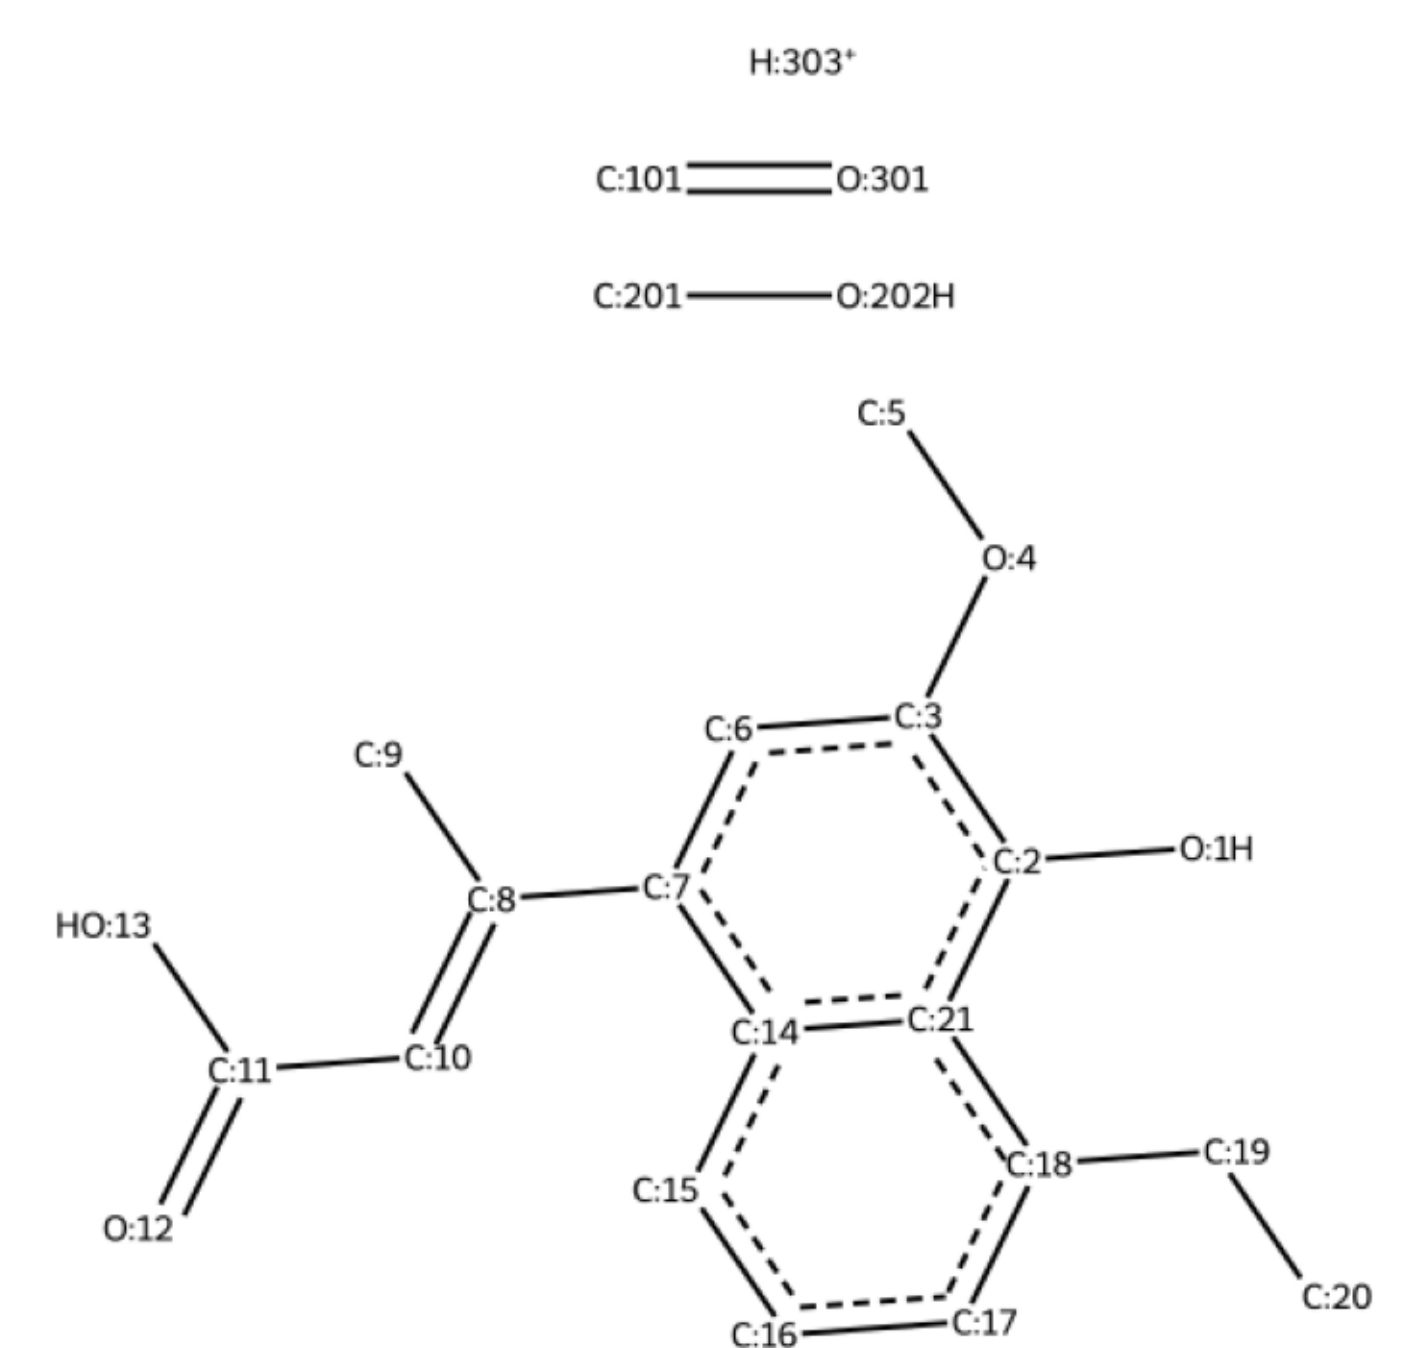



Original reaction  
sampled RXN\_ID:62)

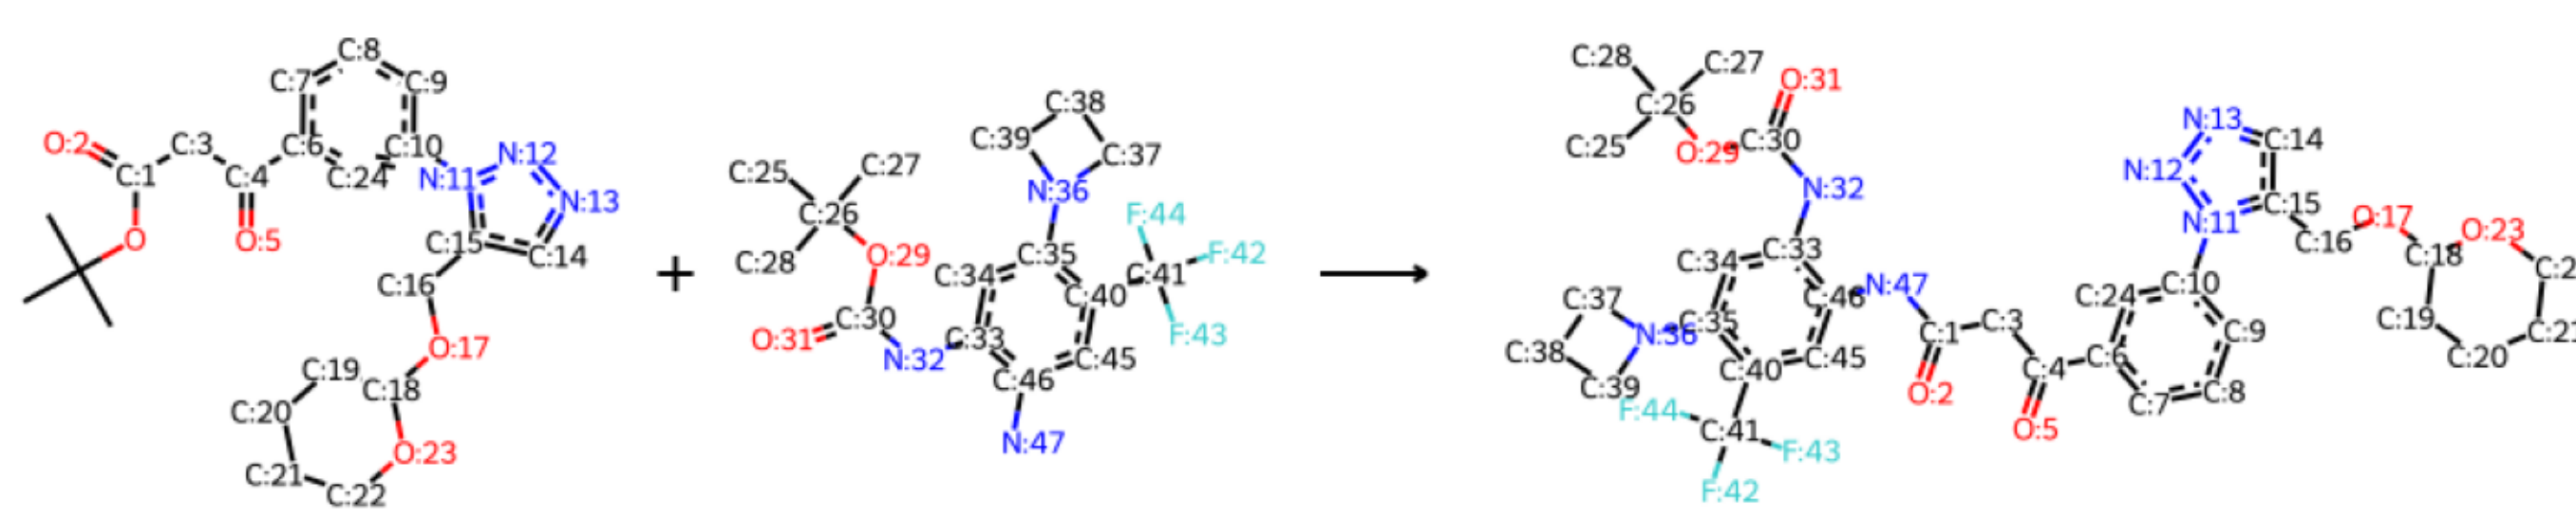

Identified mechanistic class -  
nucleophilic\_attack\_to\_(thio)carbonyl\_or\_sulfonyl reaction

Reaction with missing reagents recovered

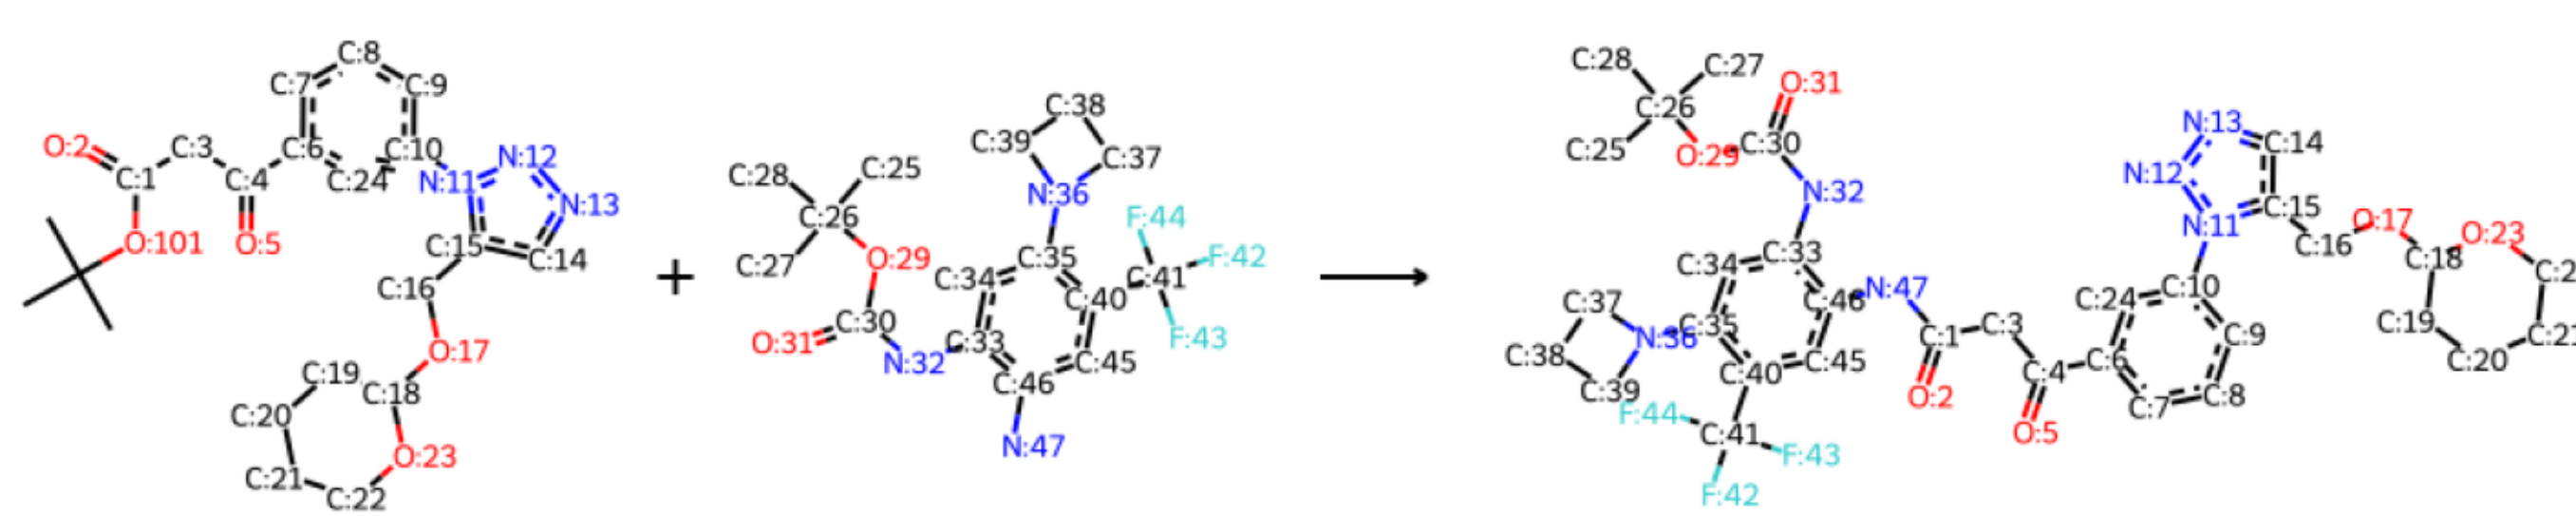

Proposed mechanistic pathway

[Arrow order: (1) green, (2) blue, (3) red, (4) orange]

step #1

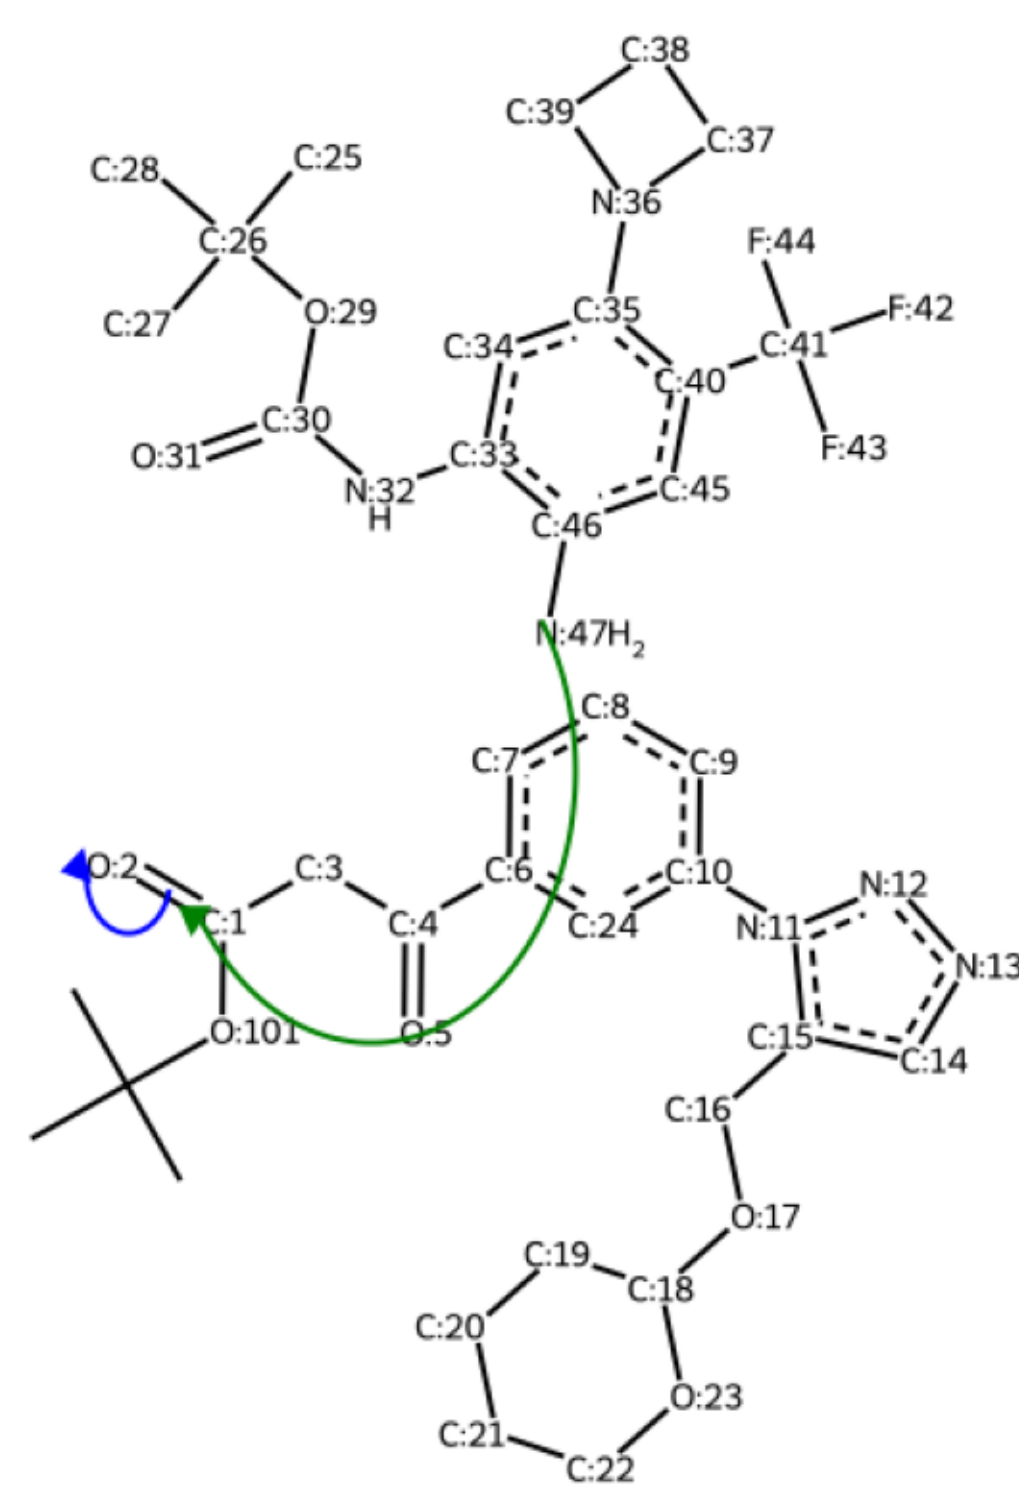

step #2

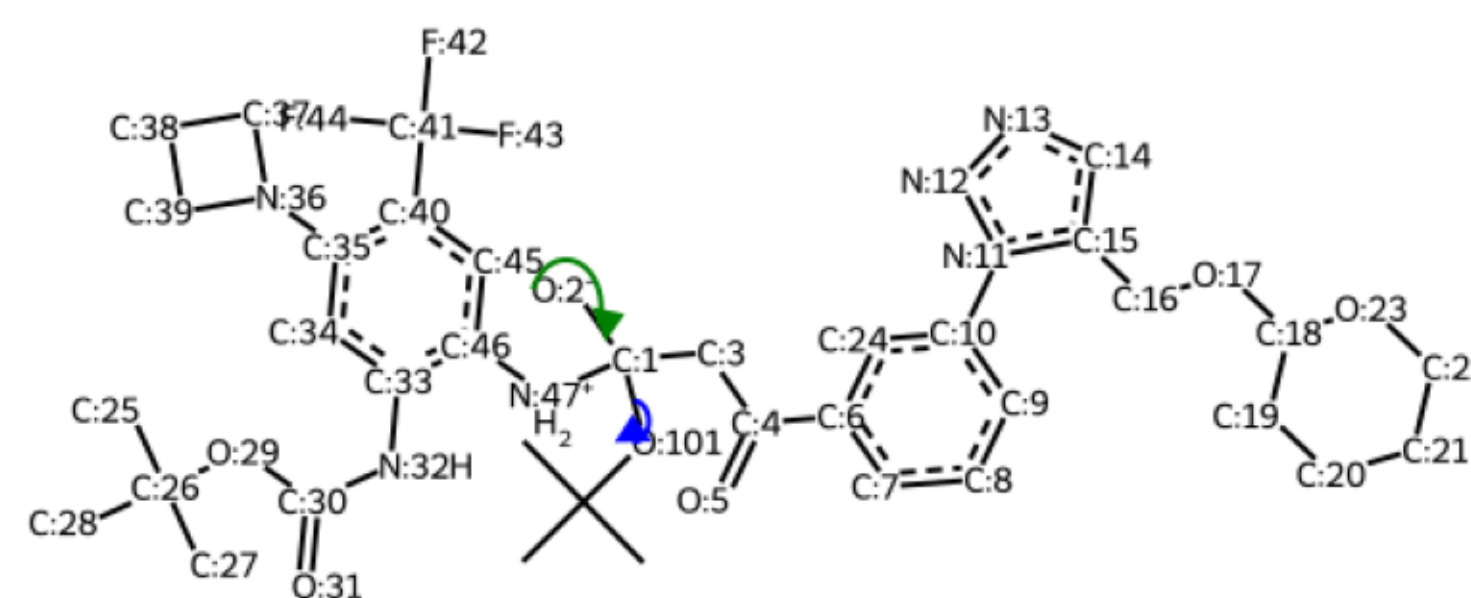

Product(s)

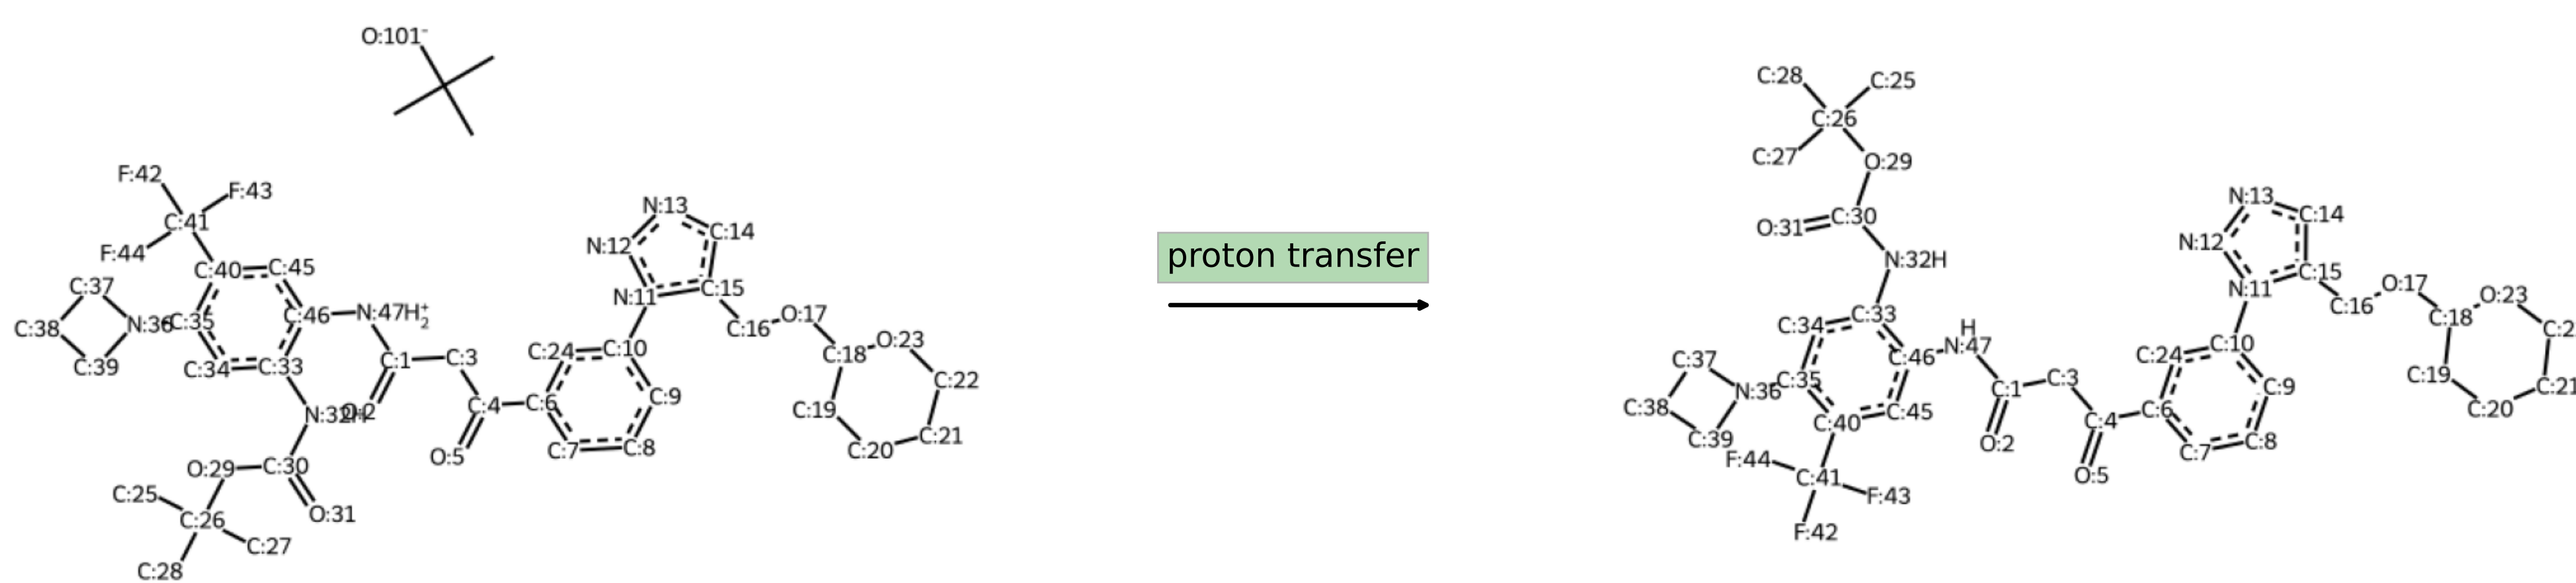

Original reaction  
sampled RXN\_ID:63)

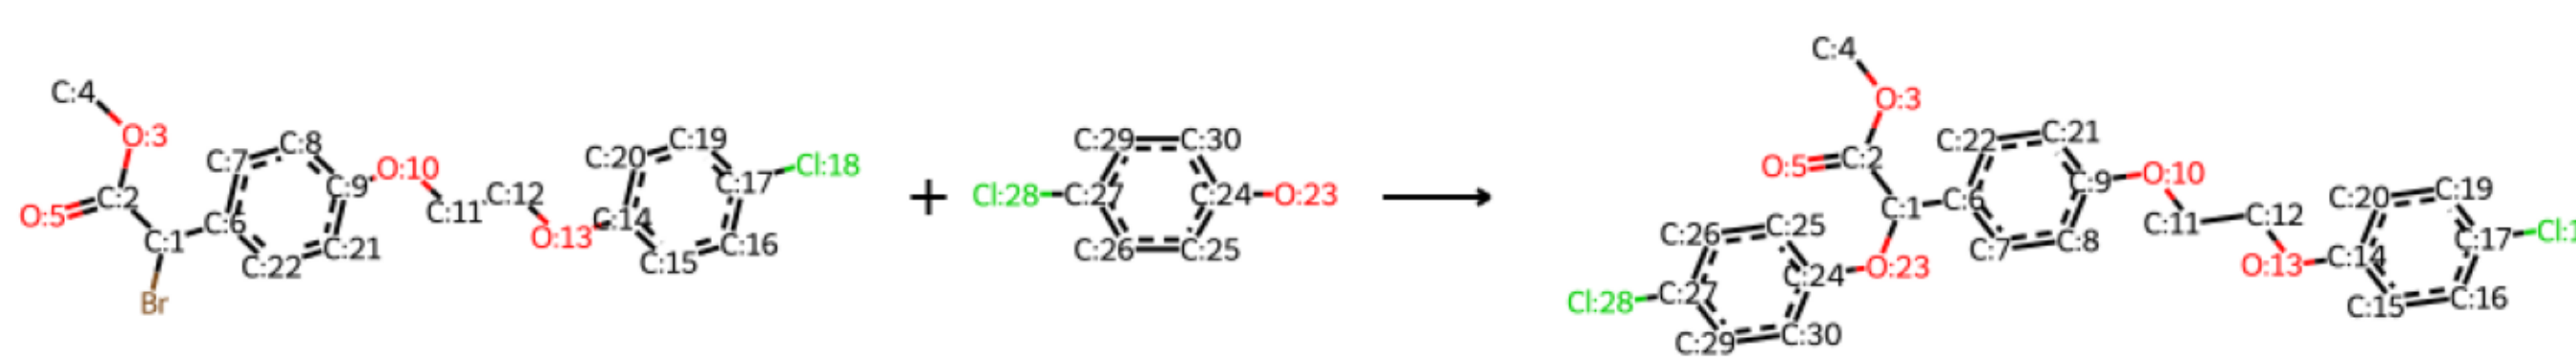

Identified mechanistic class -  
SN1 reaction

Reaction with missing reagents recovered

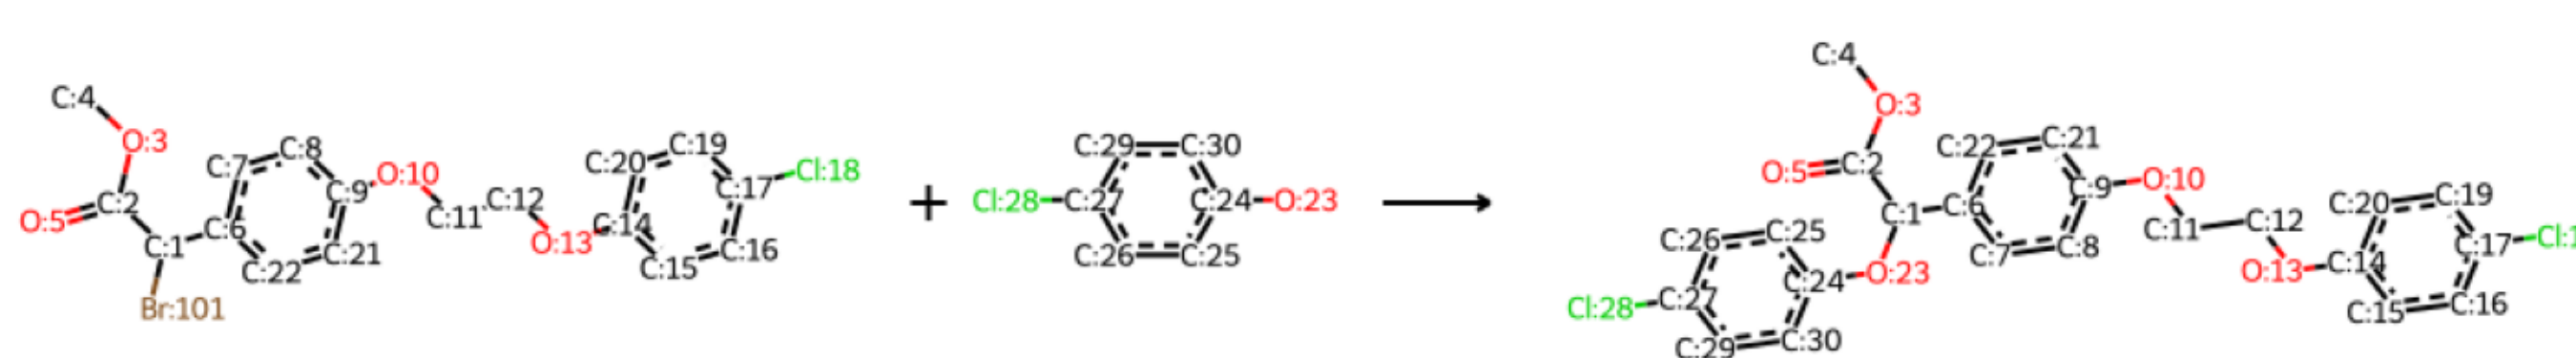

Proposed mechanistic pathway

[Arrow order: (1) green, (2) blue, (3) red, (4) orange]

step #1

step #2

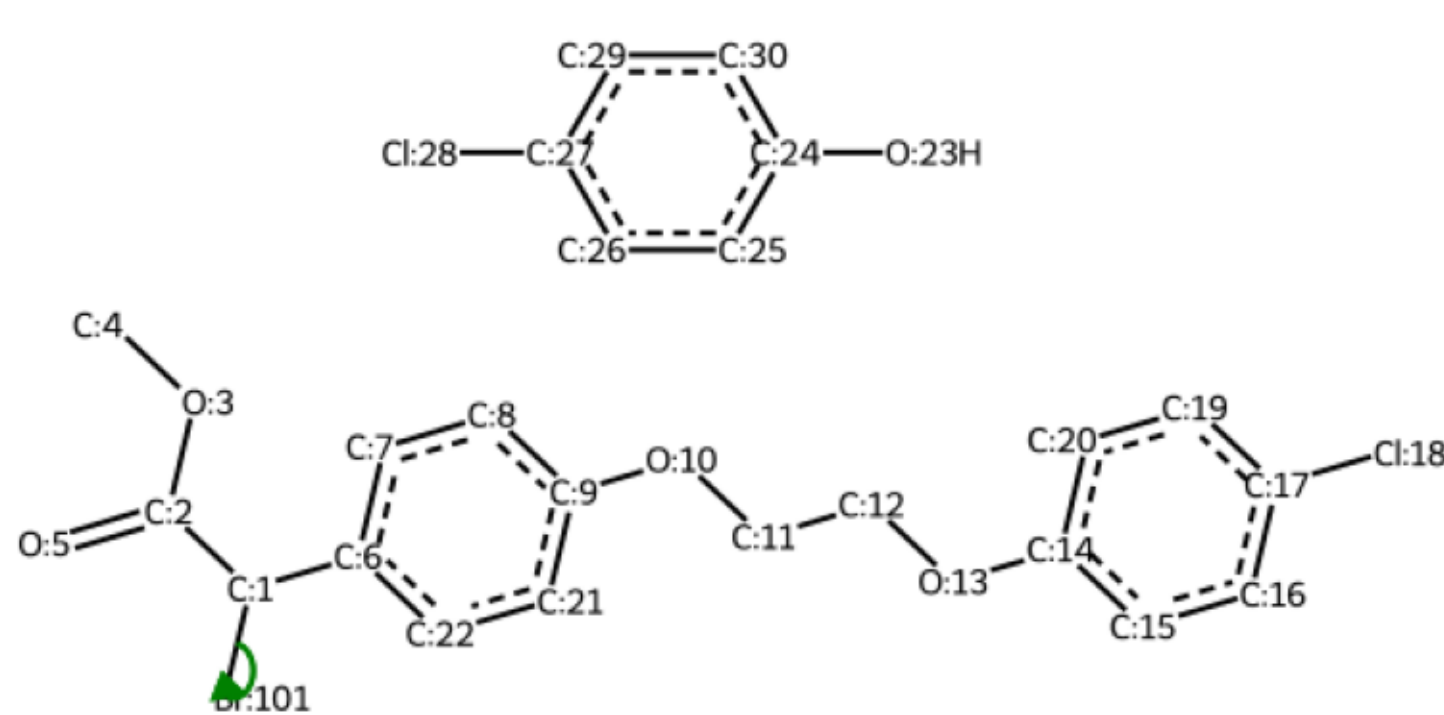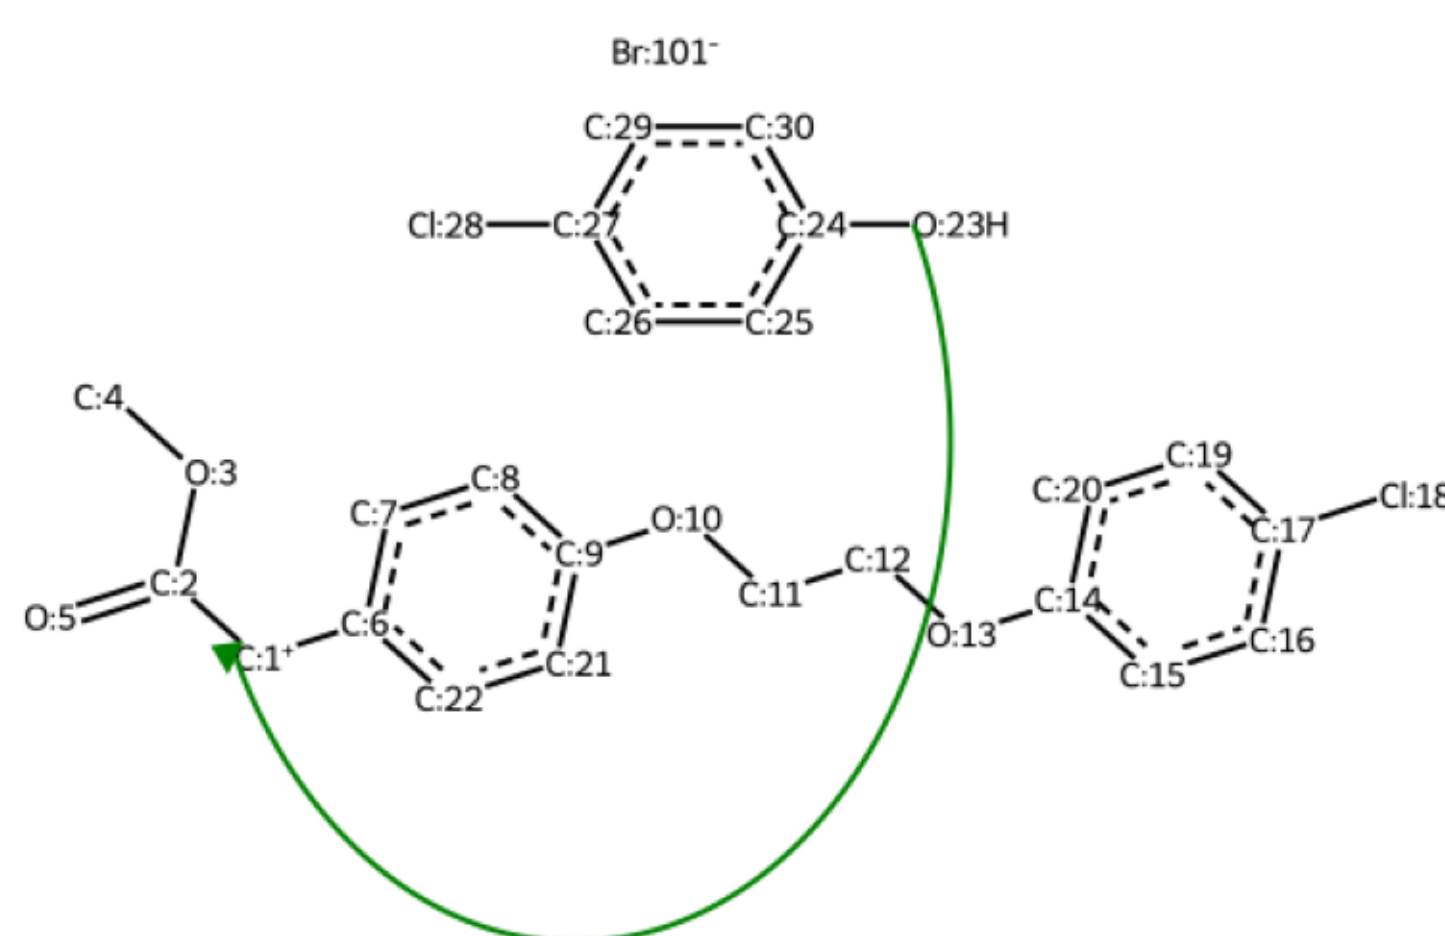

Product(s)

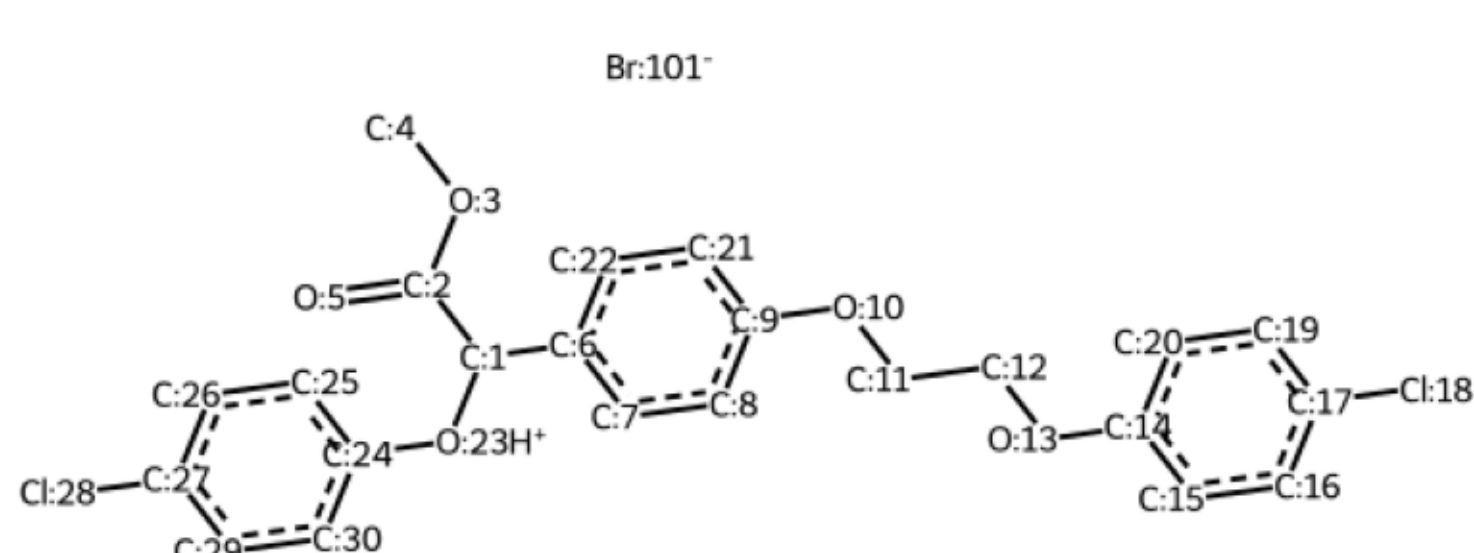

proton transfer

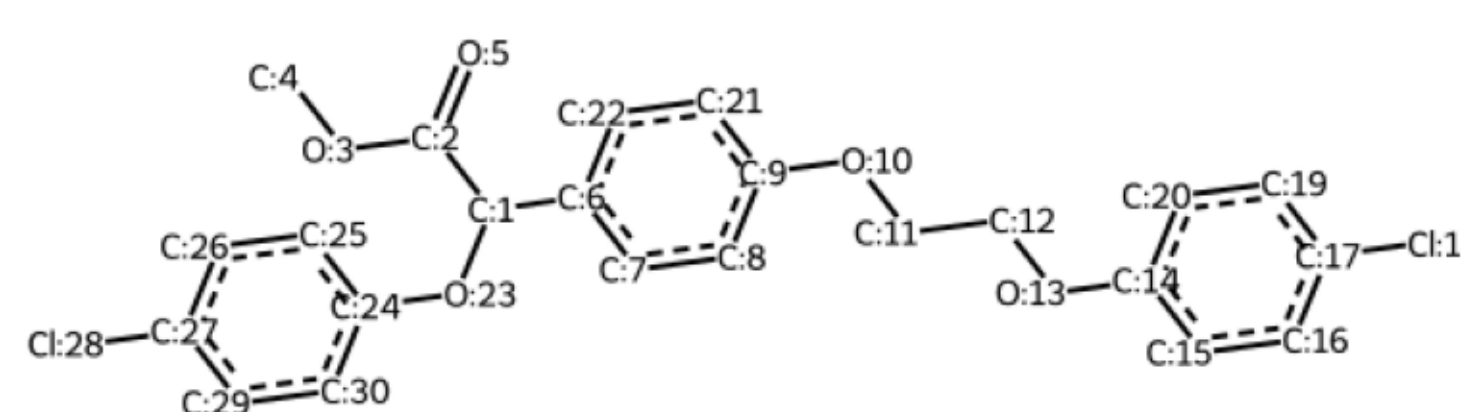



Original reaction  
sampled RXN\_ID:64)

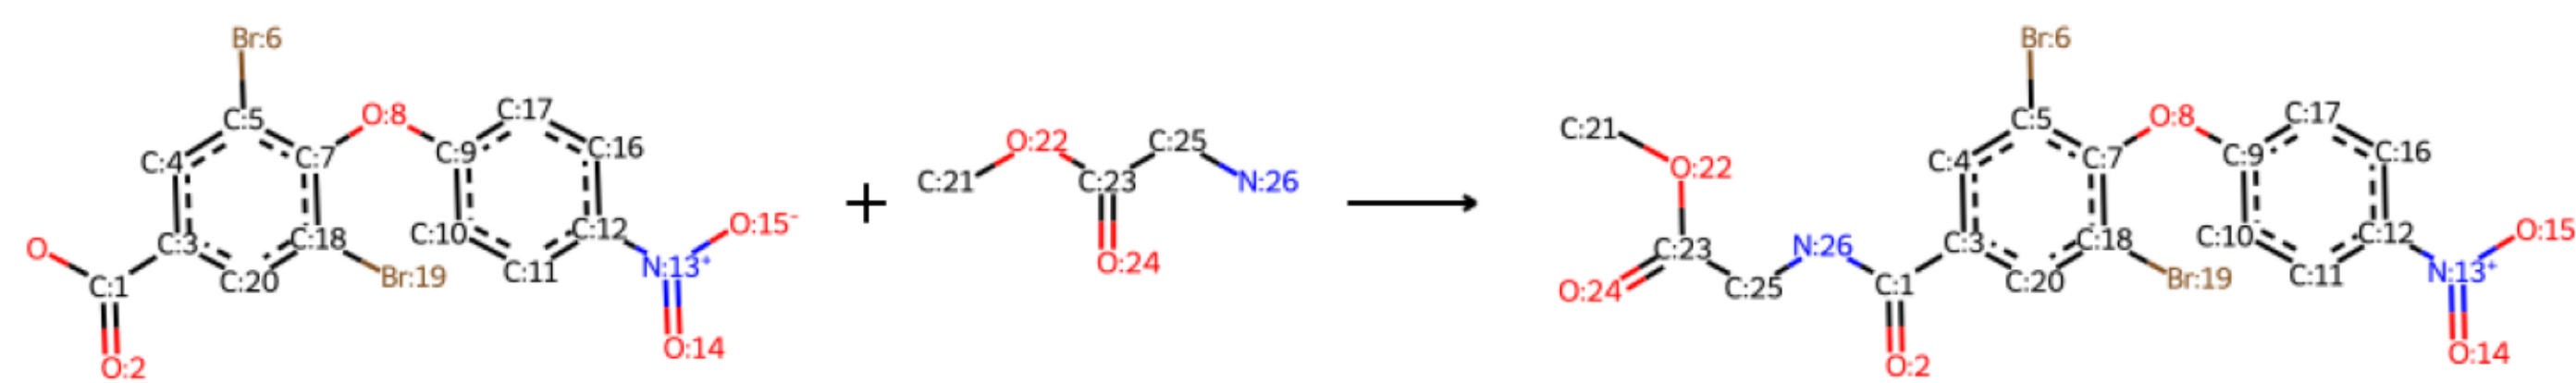

Identified mechanistic class -  
DCC\_condensation reaction

Reaction with missing reagents recovered

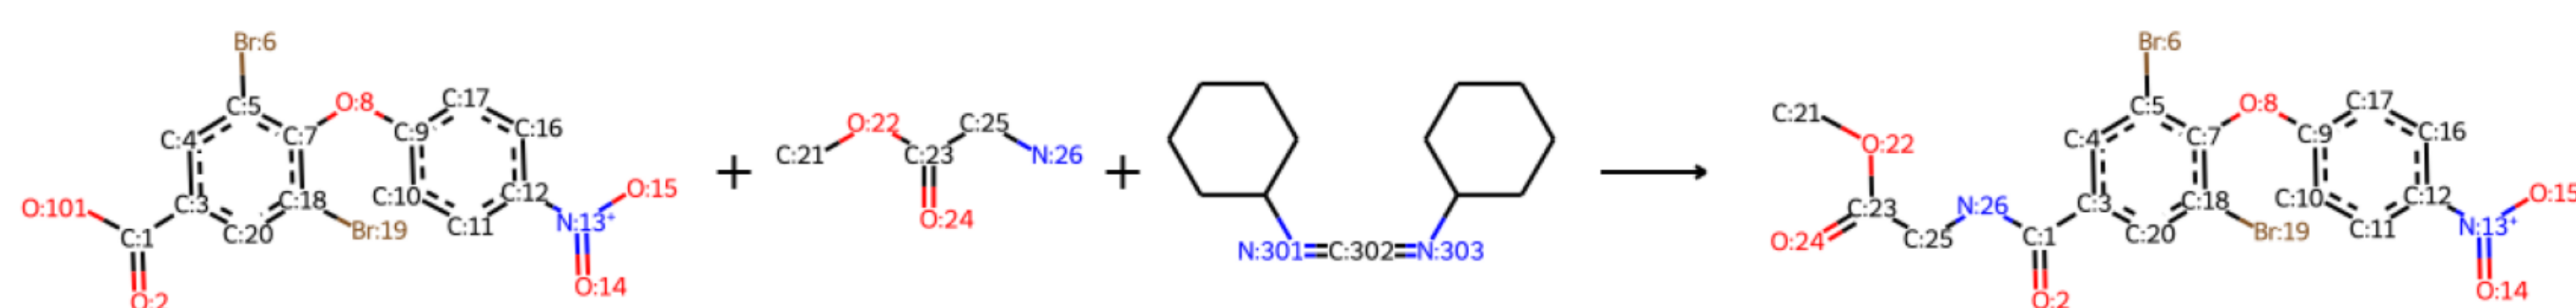

Proposed mechanistic pathway

[Arrow order: (1) green, (2) blue, (3) red, (4) orange]

step #1

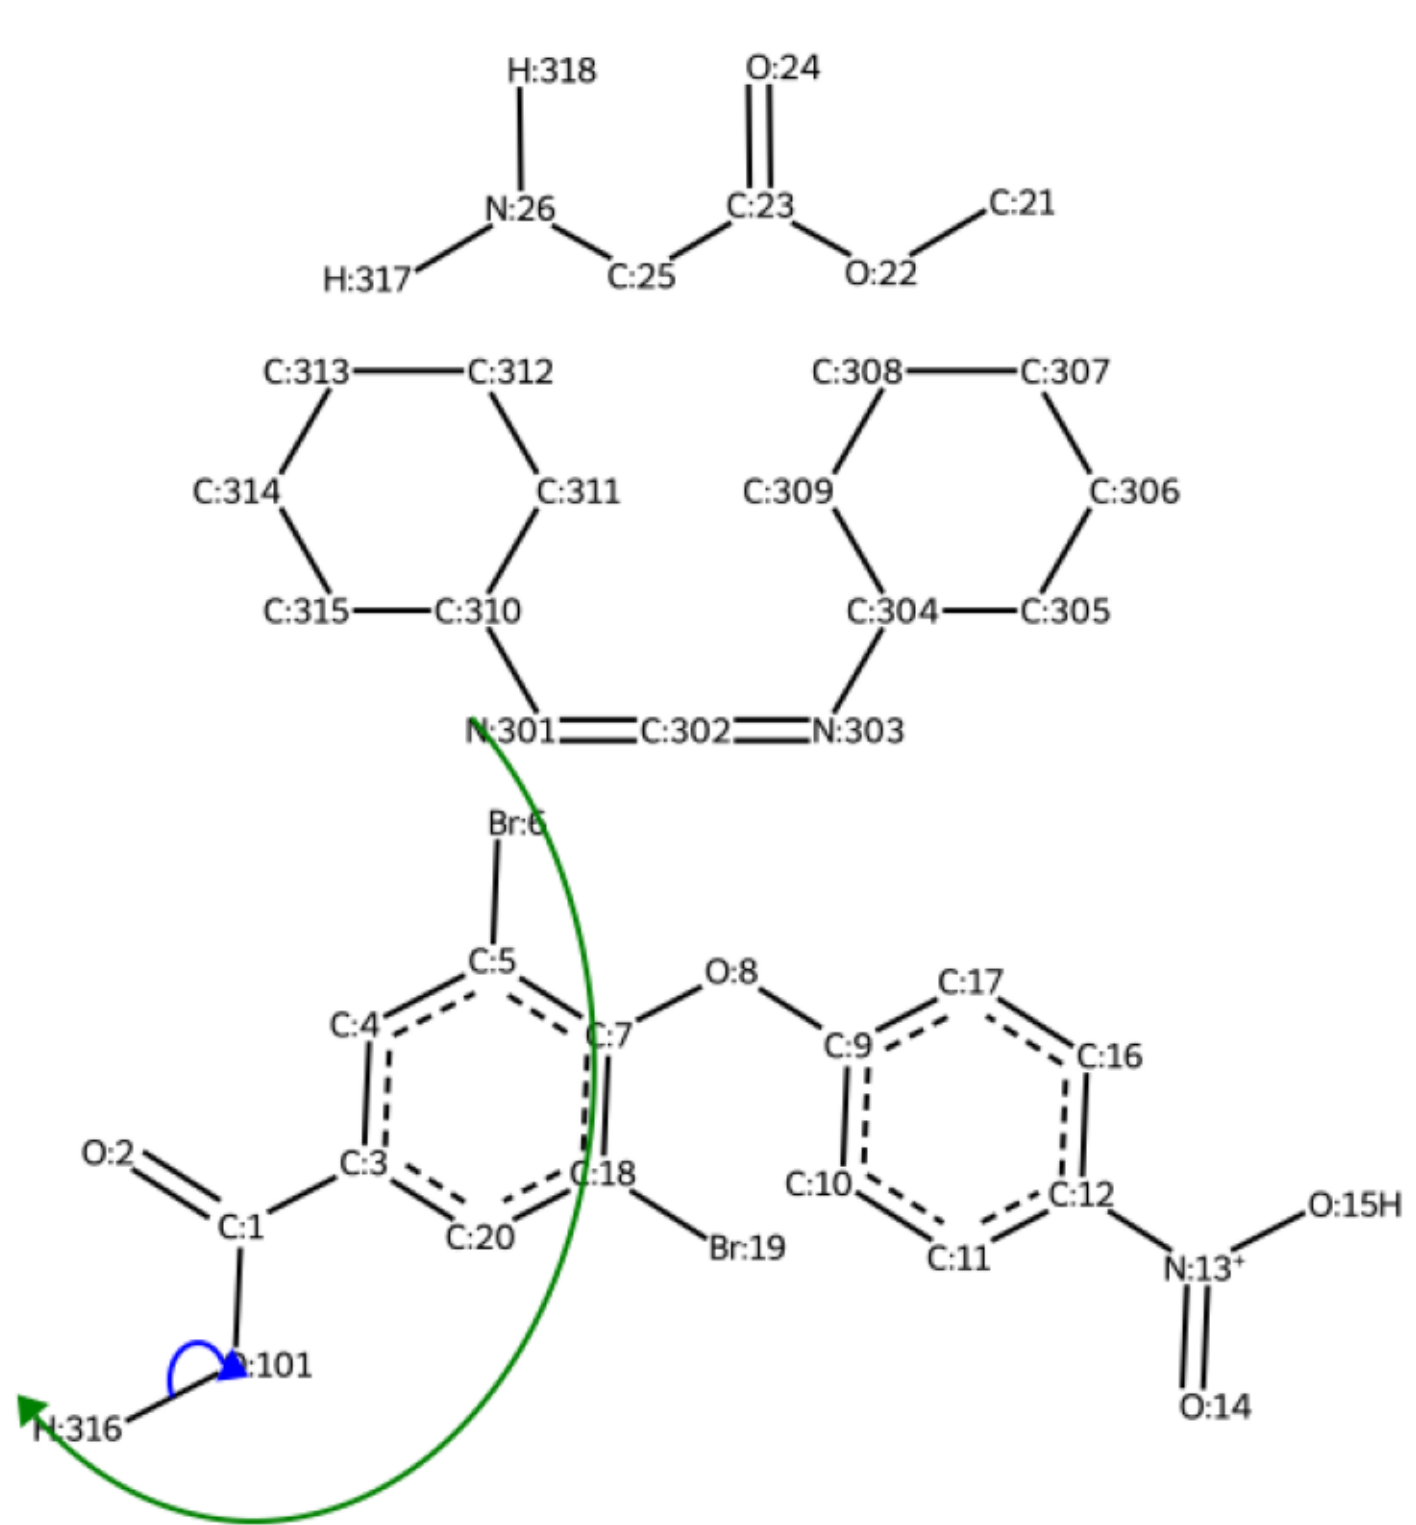

step #2

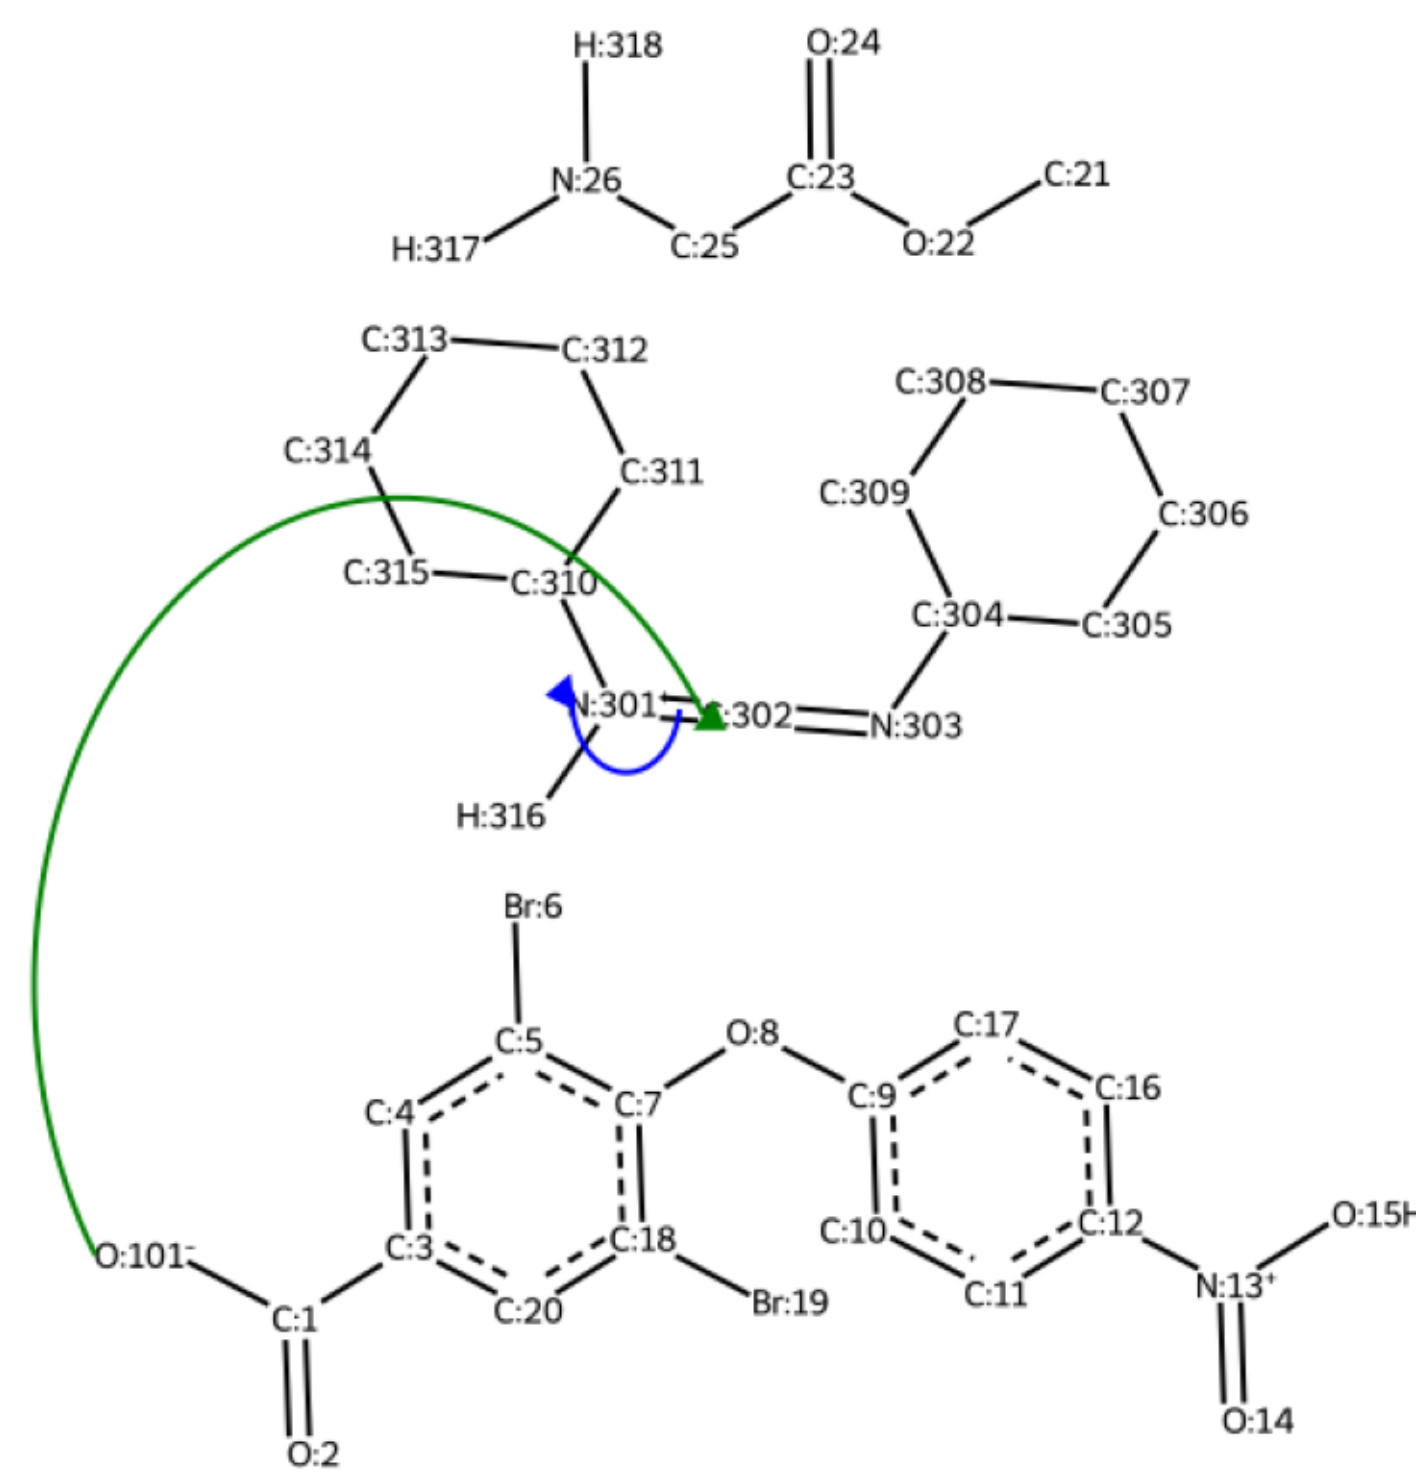

step #3

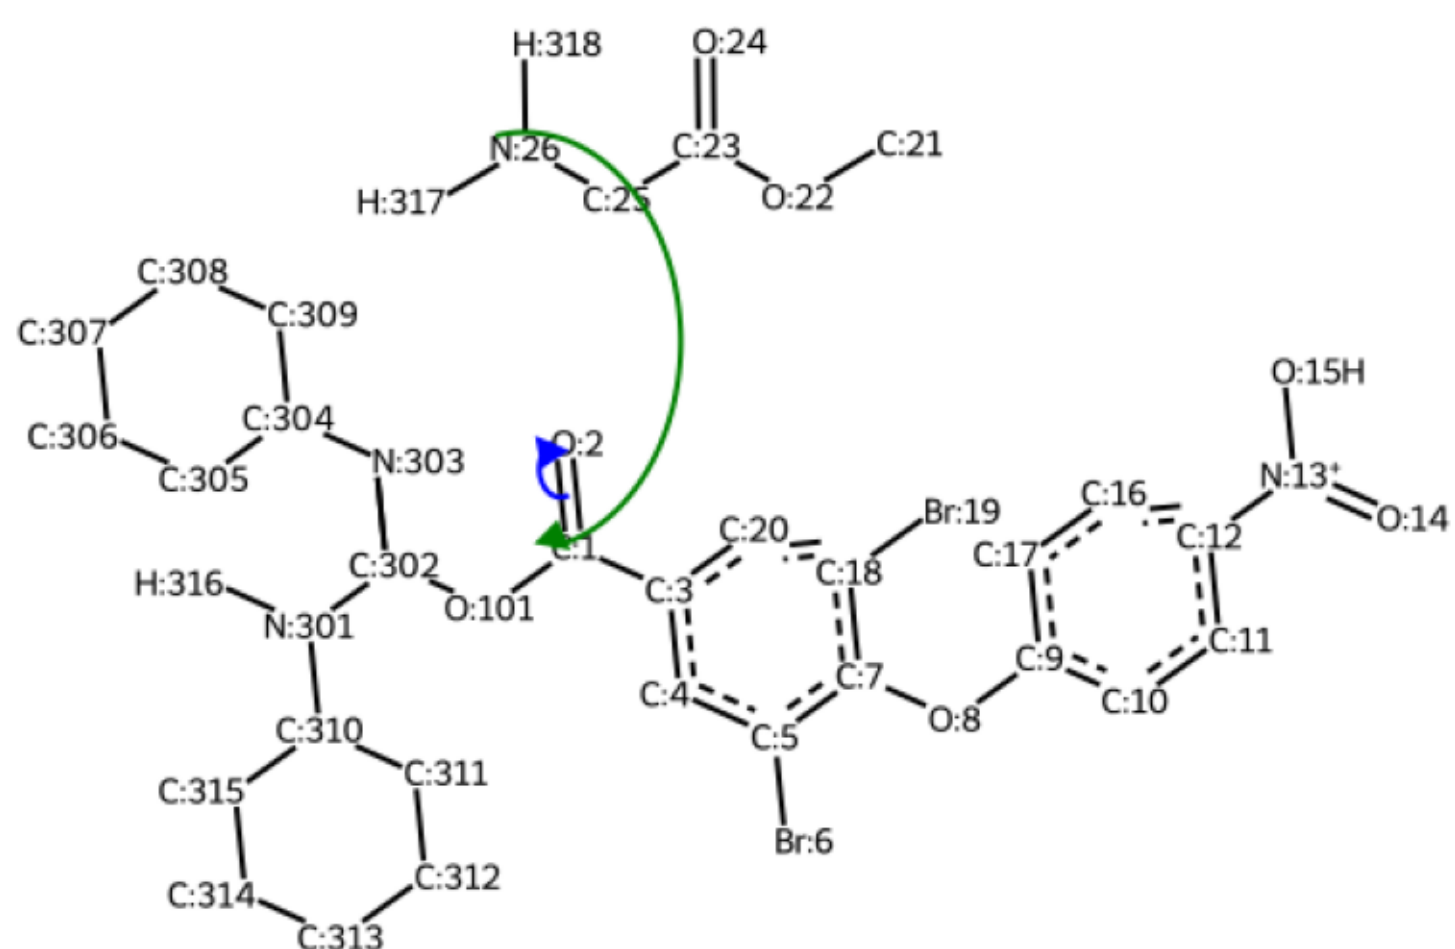

step #4

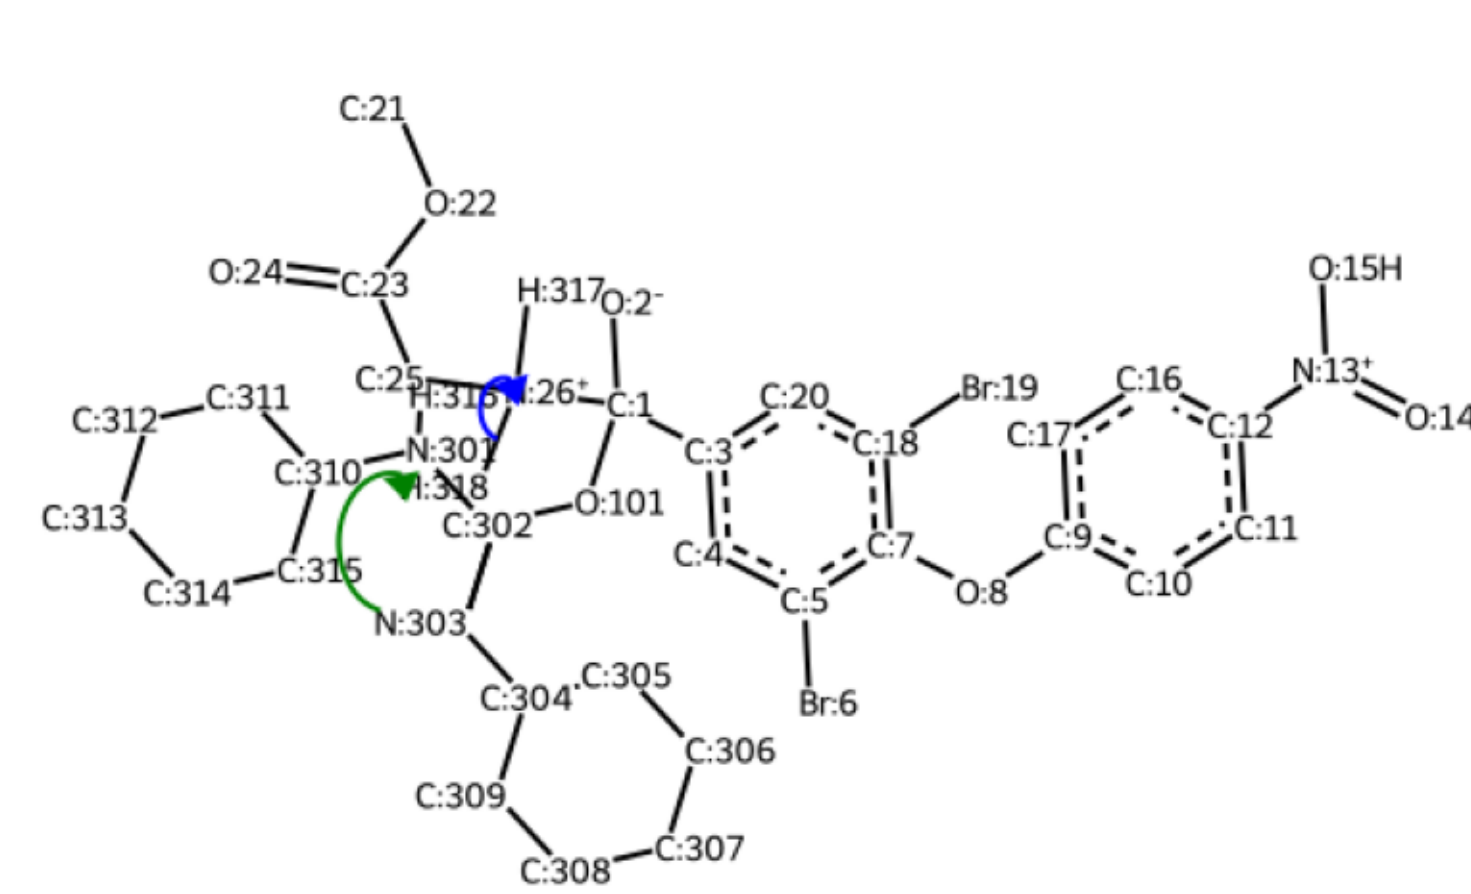

step #5

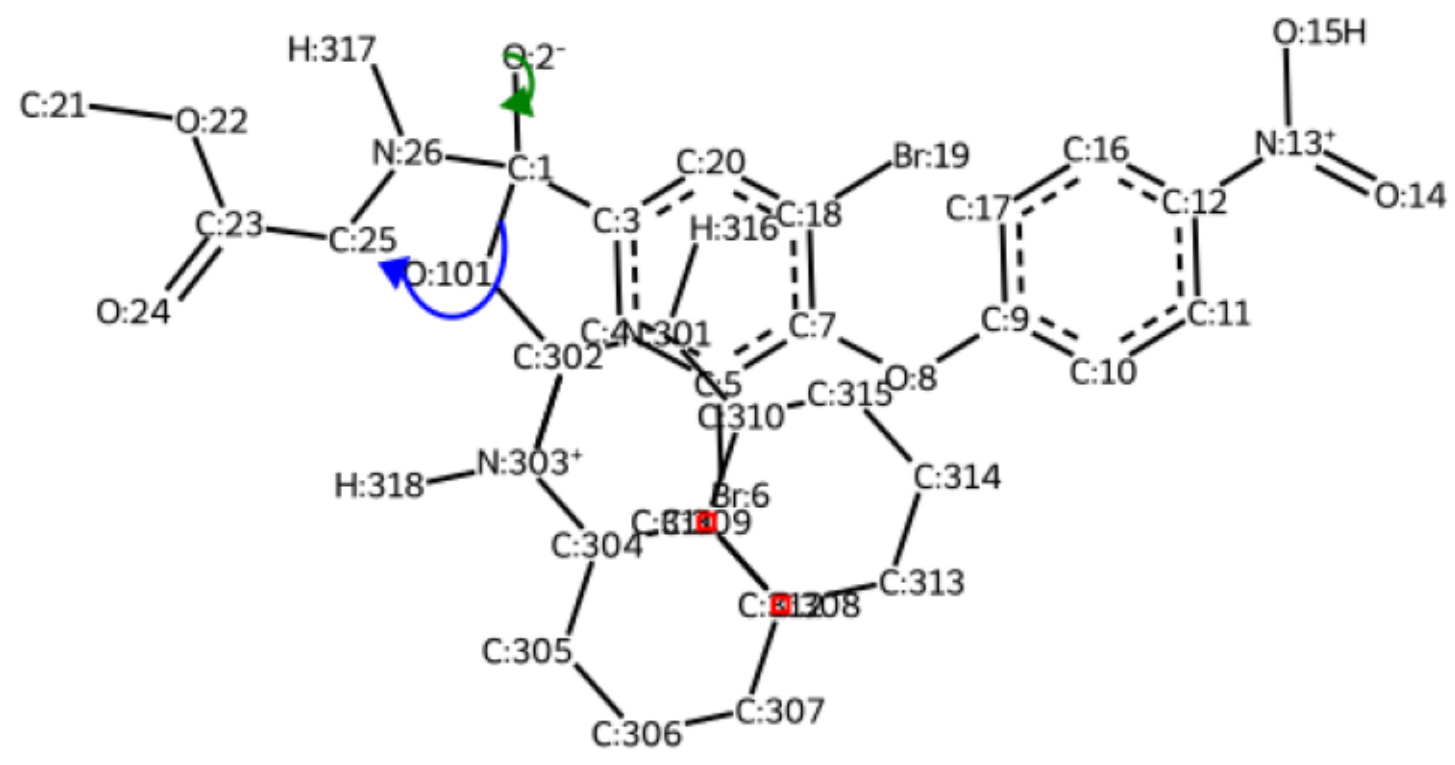

step #6

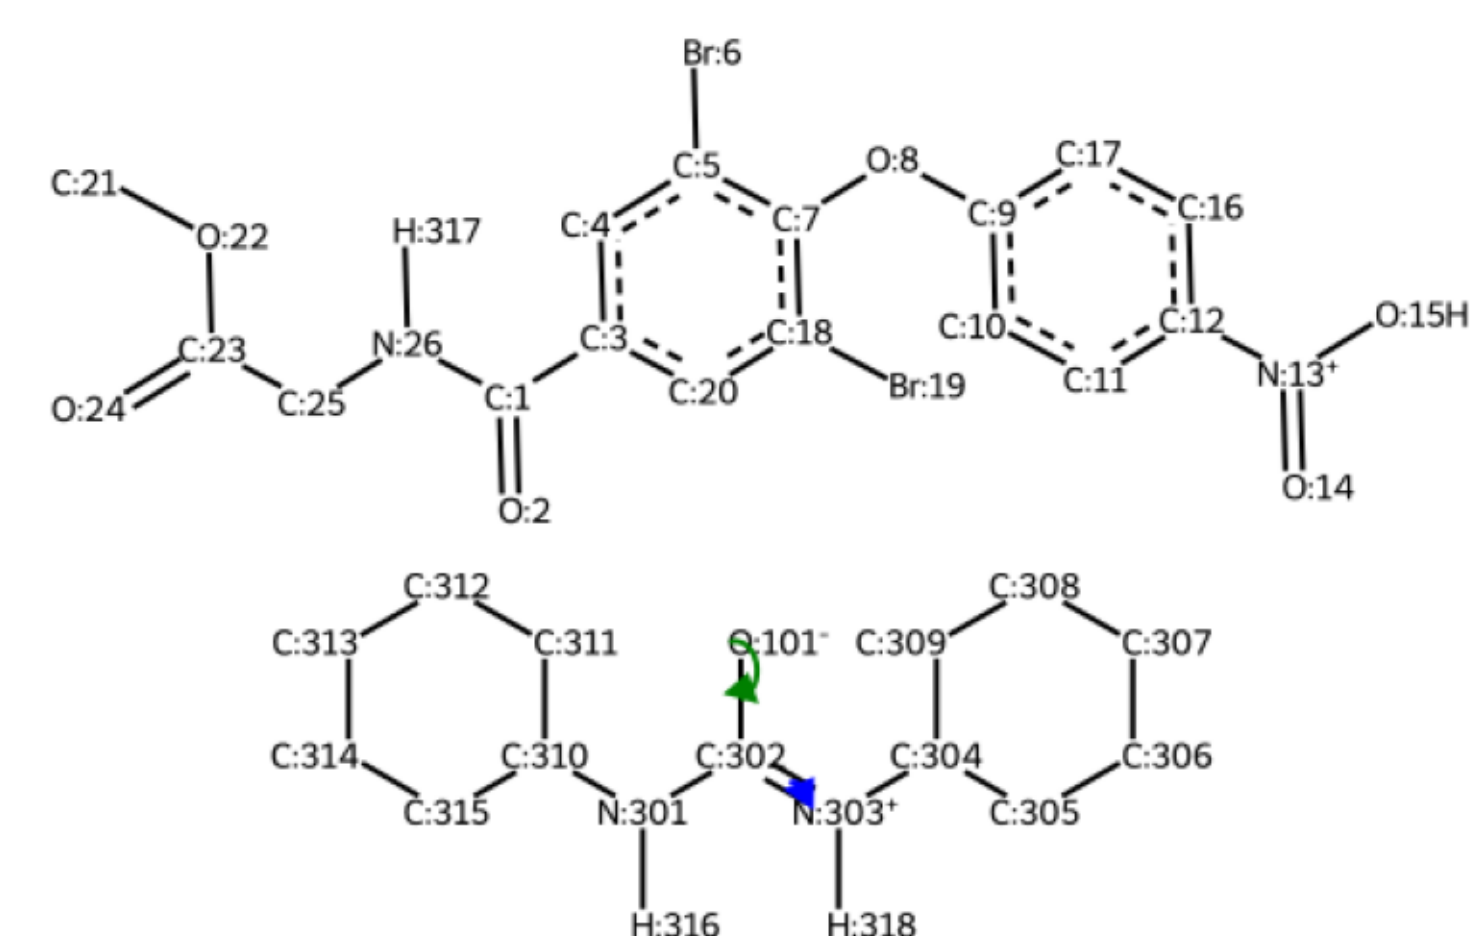

Product(s)

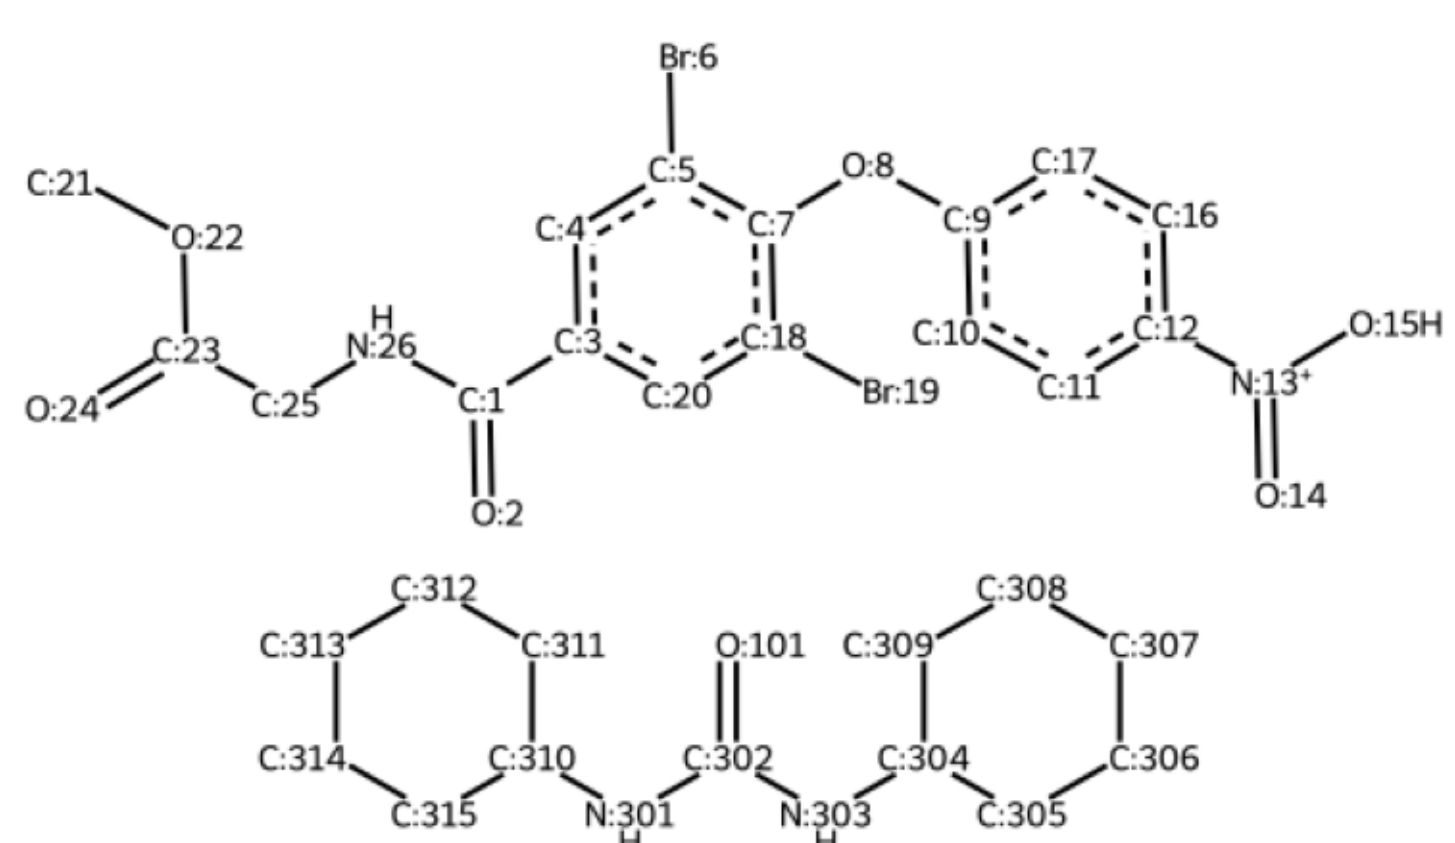







Original reaction  
sampled RXN\_ID:66)

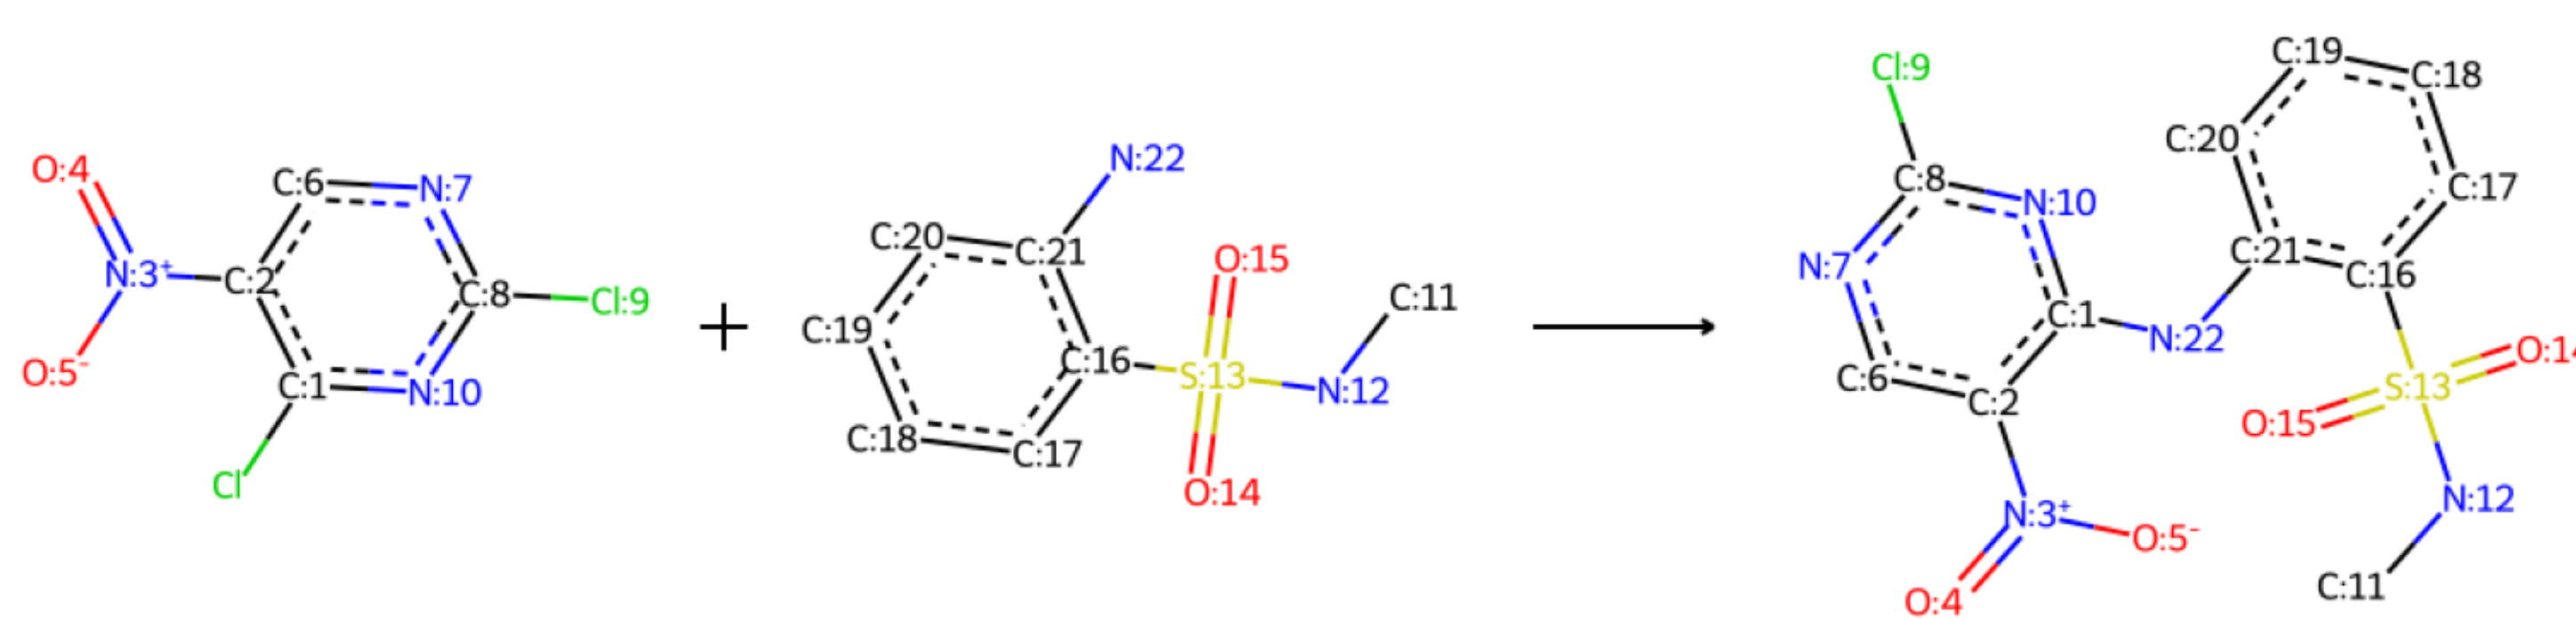

Identified mechanistic class -  
S<sub>N</sub>Ar(ortho) reaction

Reaction with missing reagents recovered

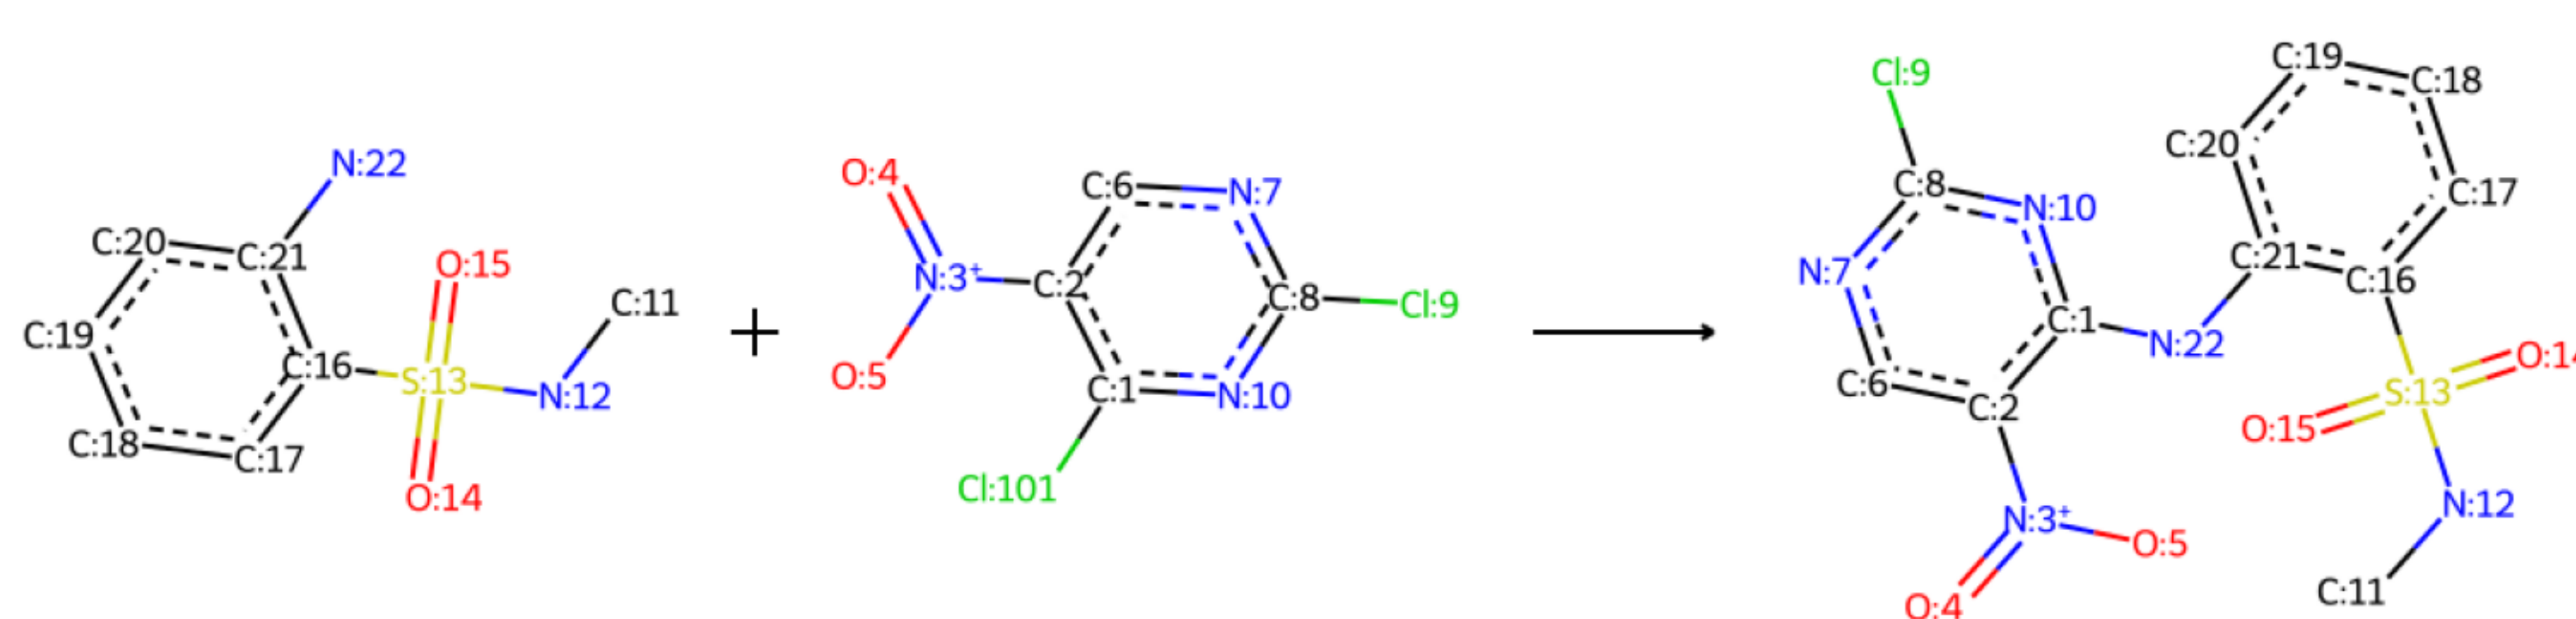

Proposed mechanistic pathway

[Arrow order: (1) green, (2) blue, (3) red, (4) orange]

step #1

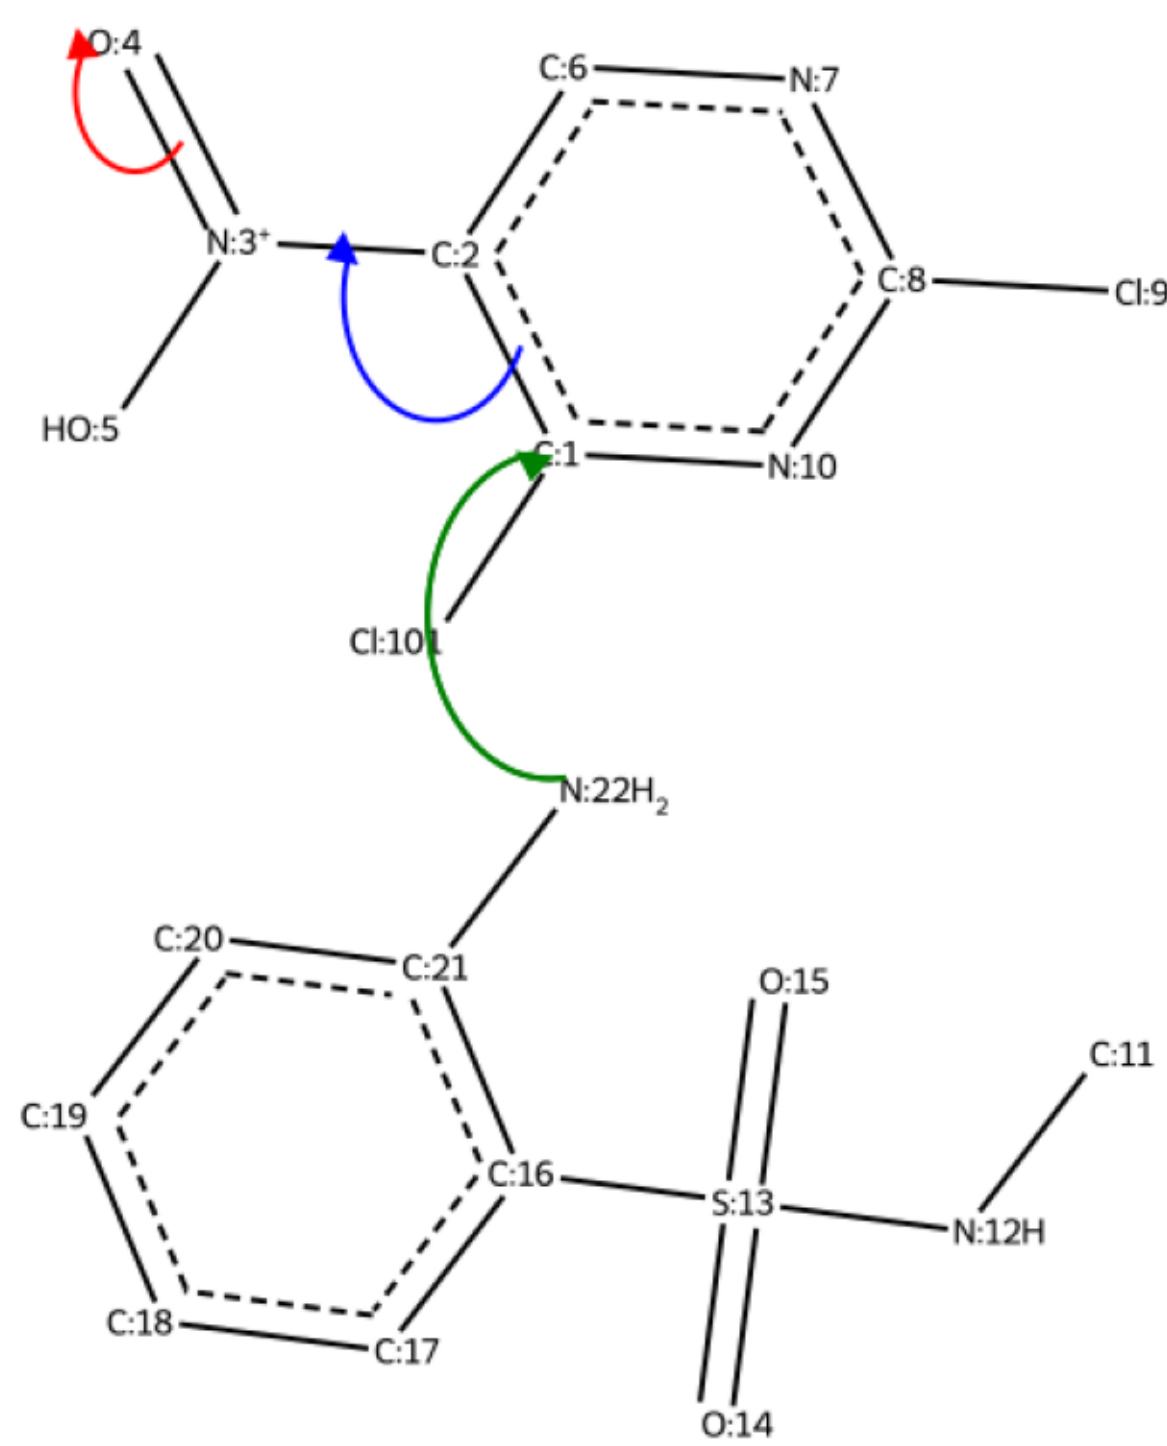

step #2

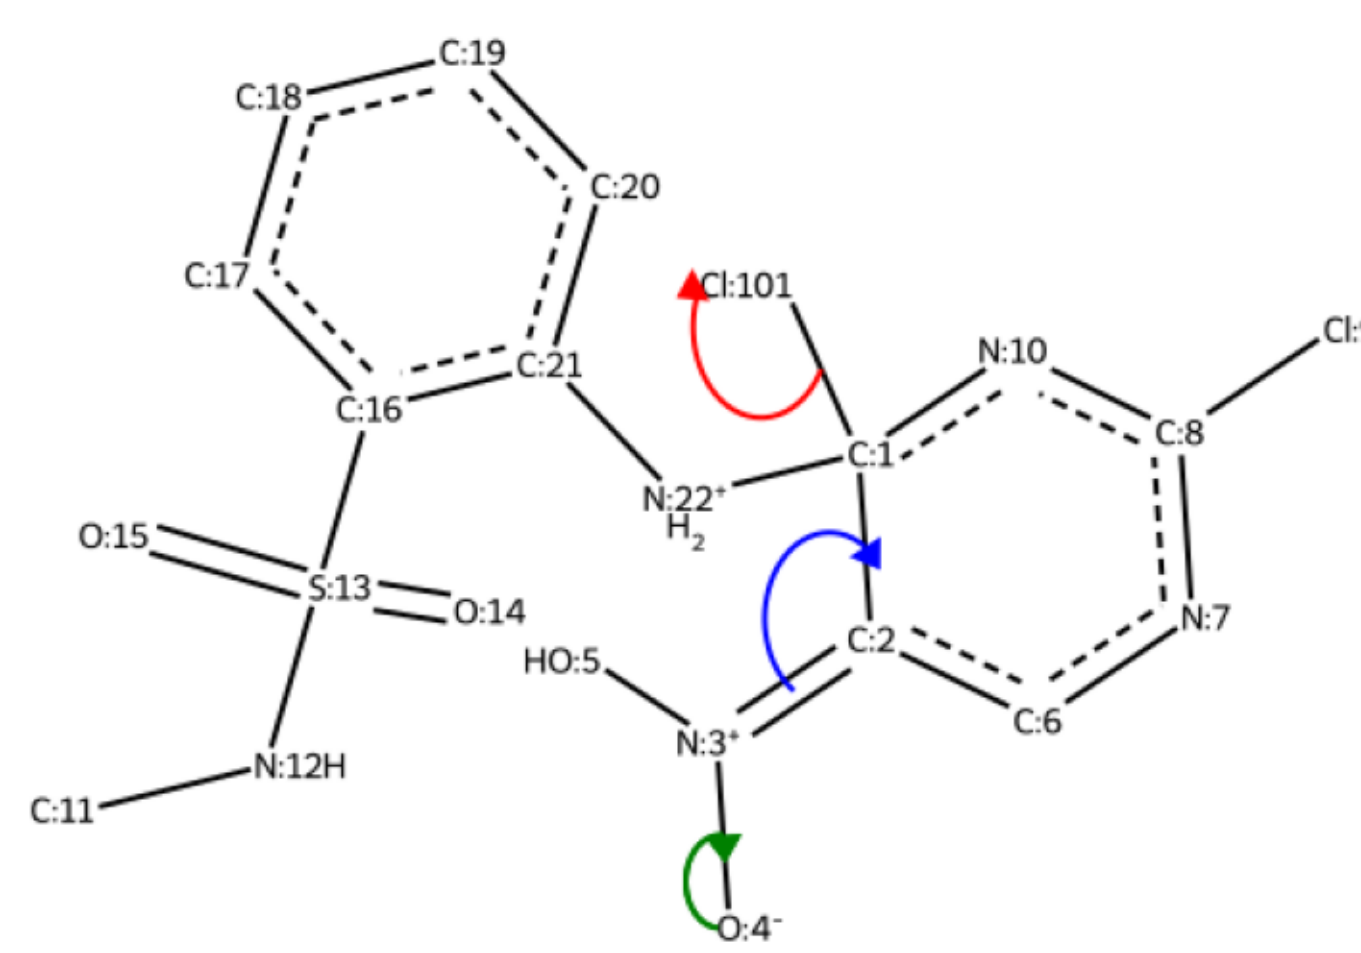

Product(s)

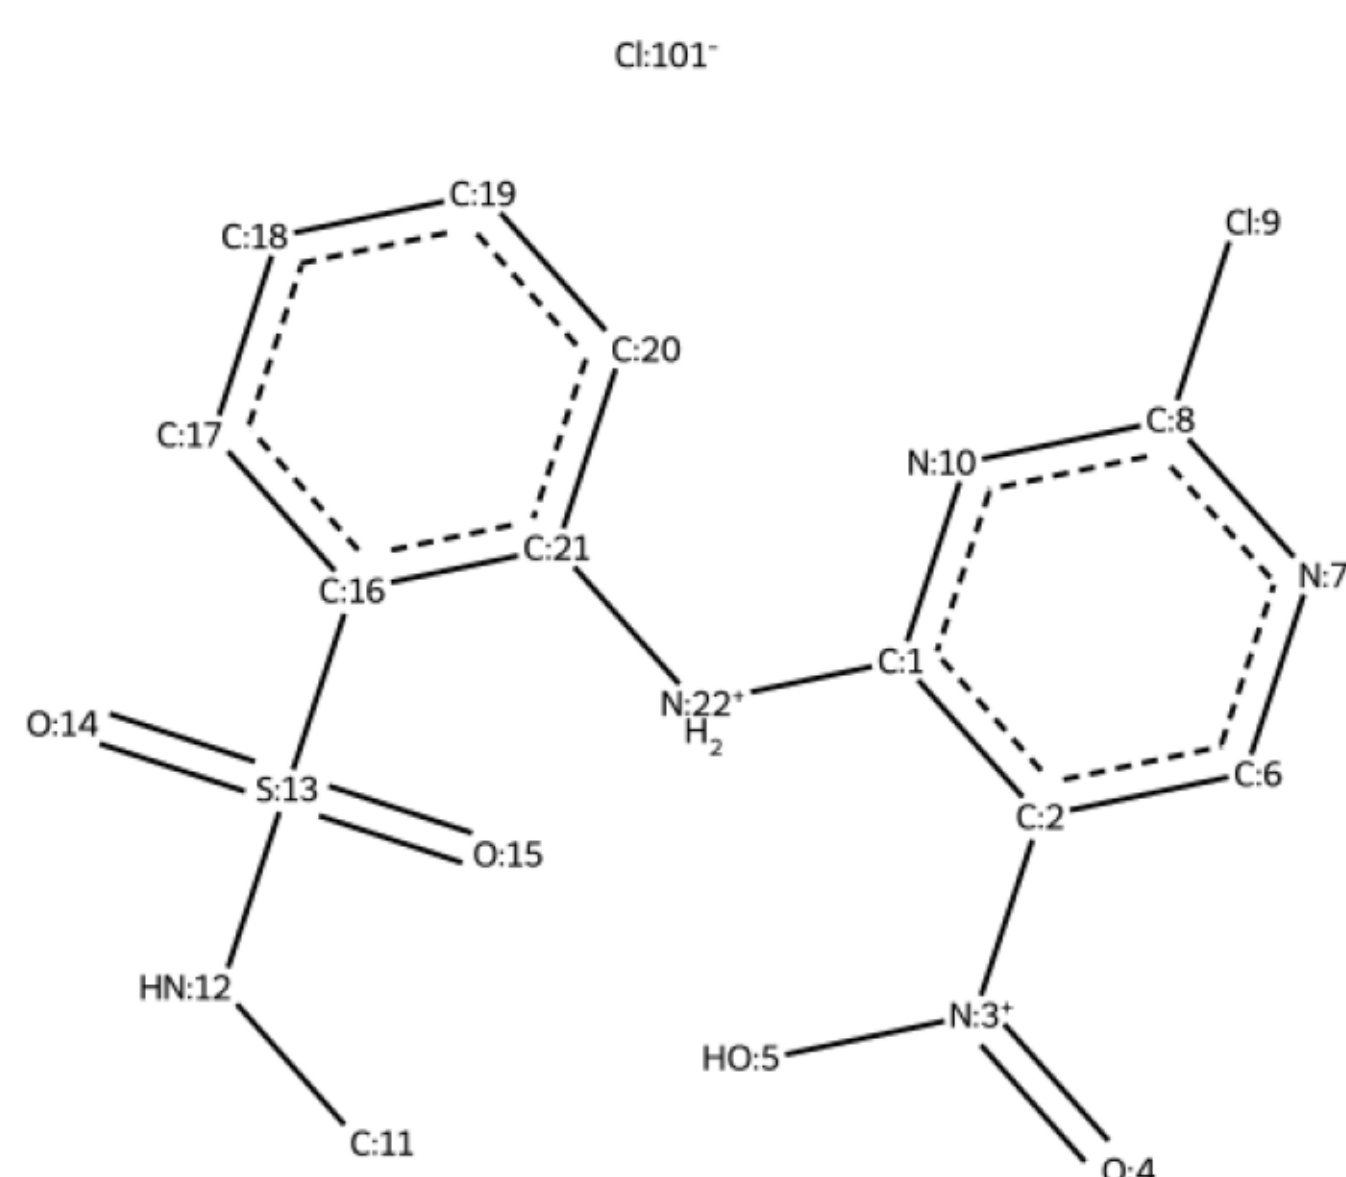

proton transfer

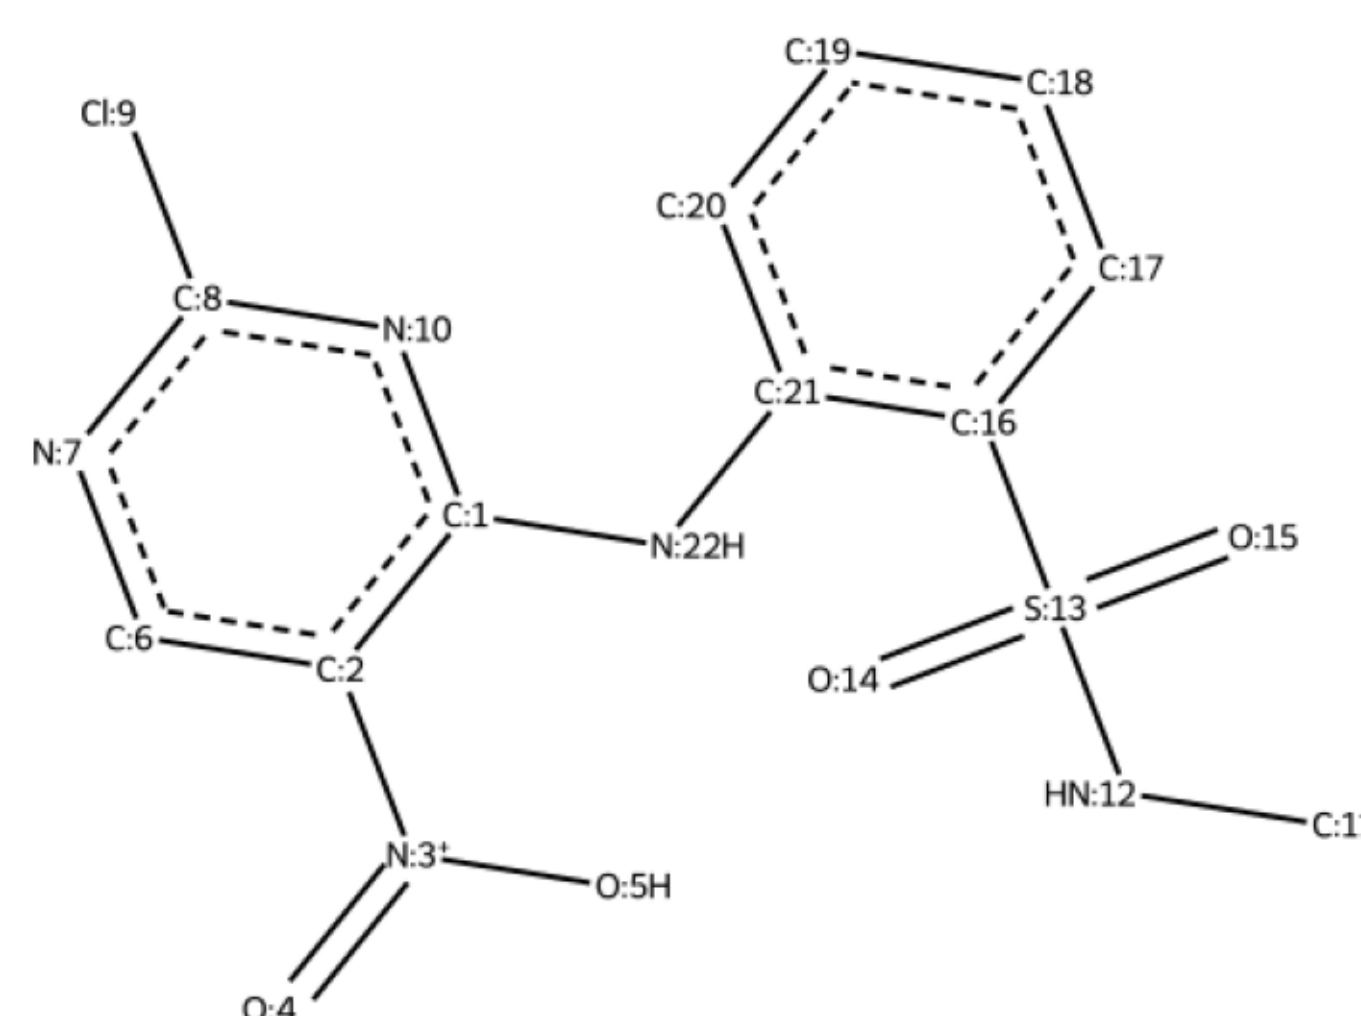

Original reaction  
sampled RXN\_ID:67)

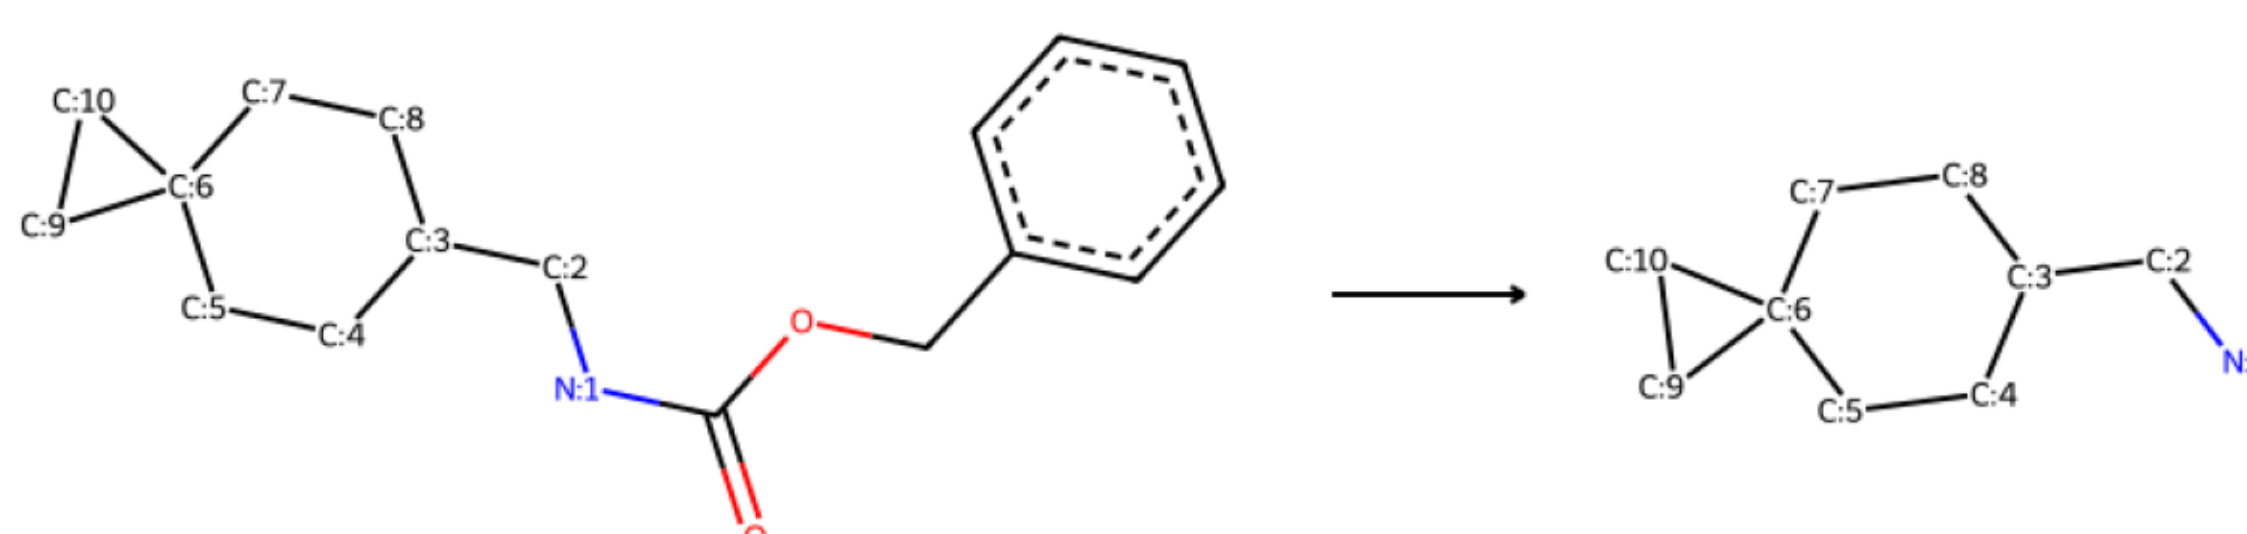

Identified mechanistic class -  
Cbz\_deprotection reaction

Reaction with missing reagents recovered

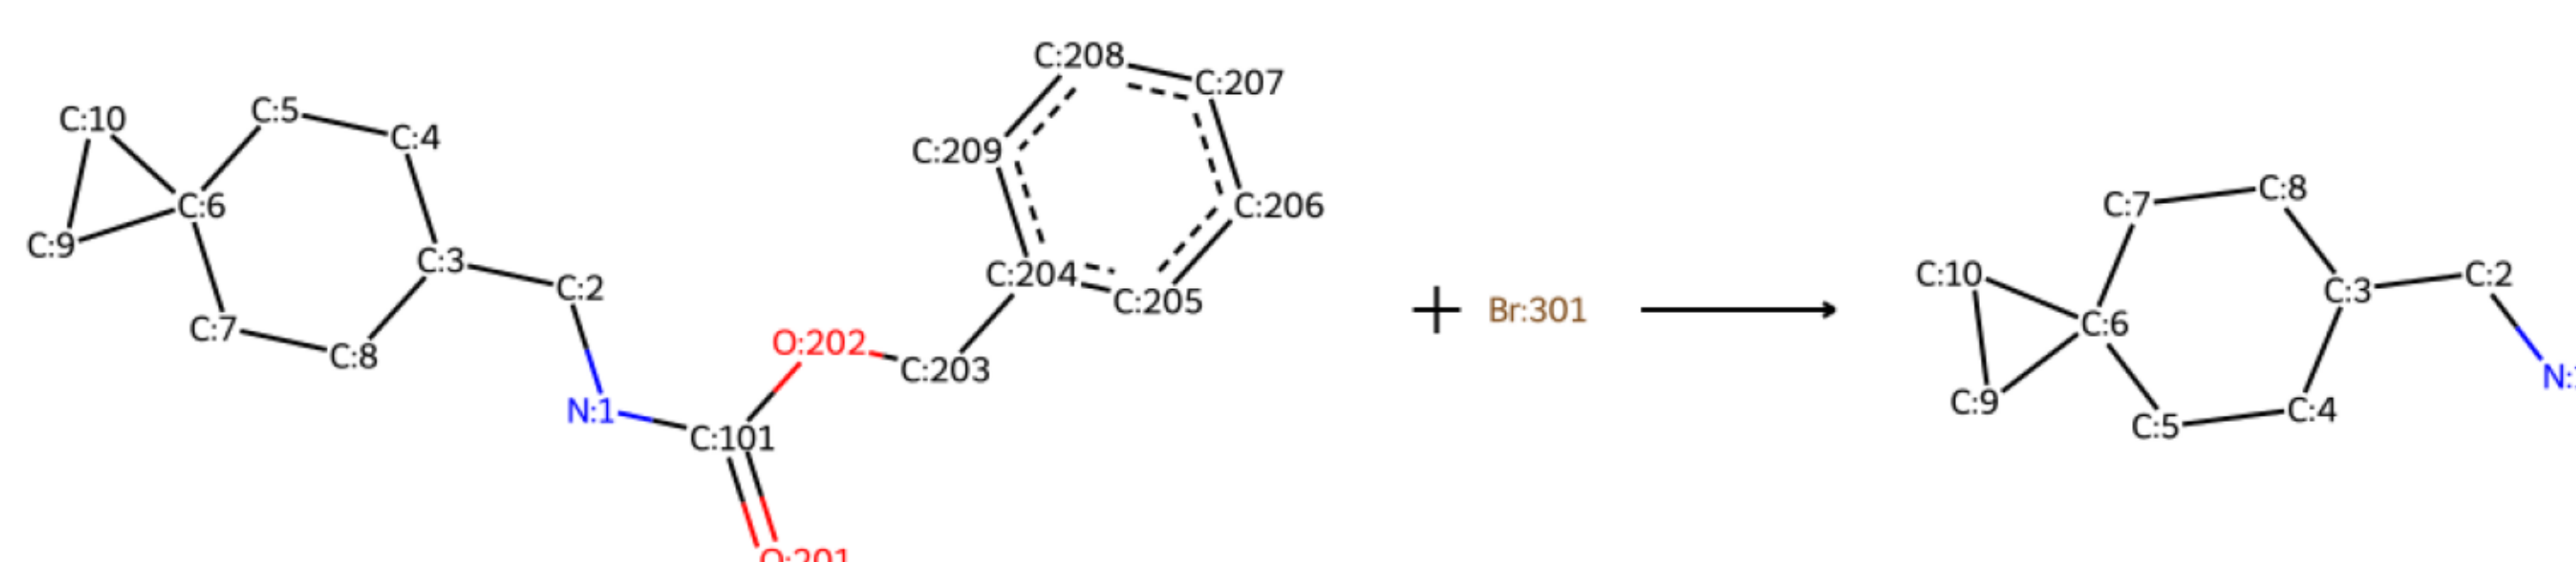

Proposed mechanistic pathway

[Arrow order: (1) green, (2) blue, (3) red, (4) orange]

step #1

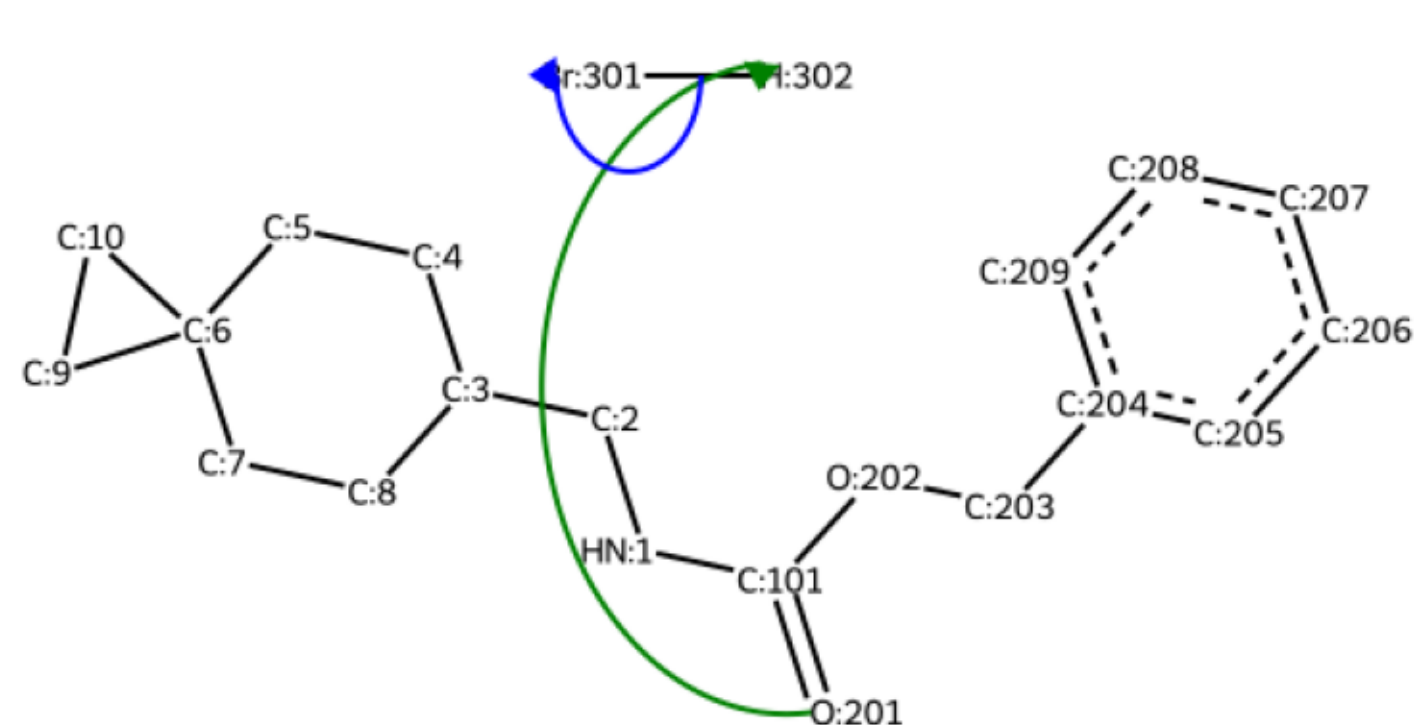

step #2

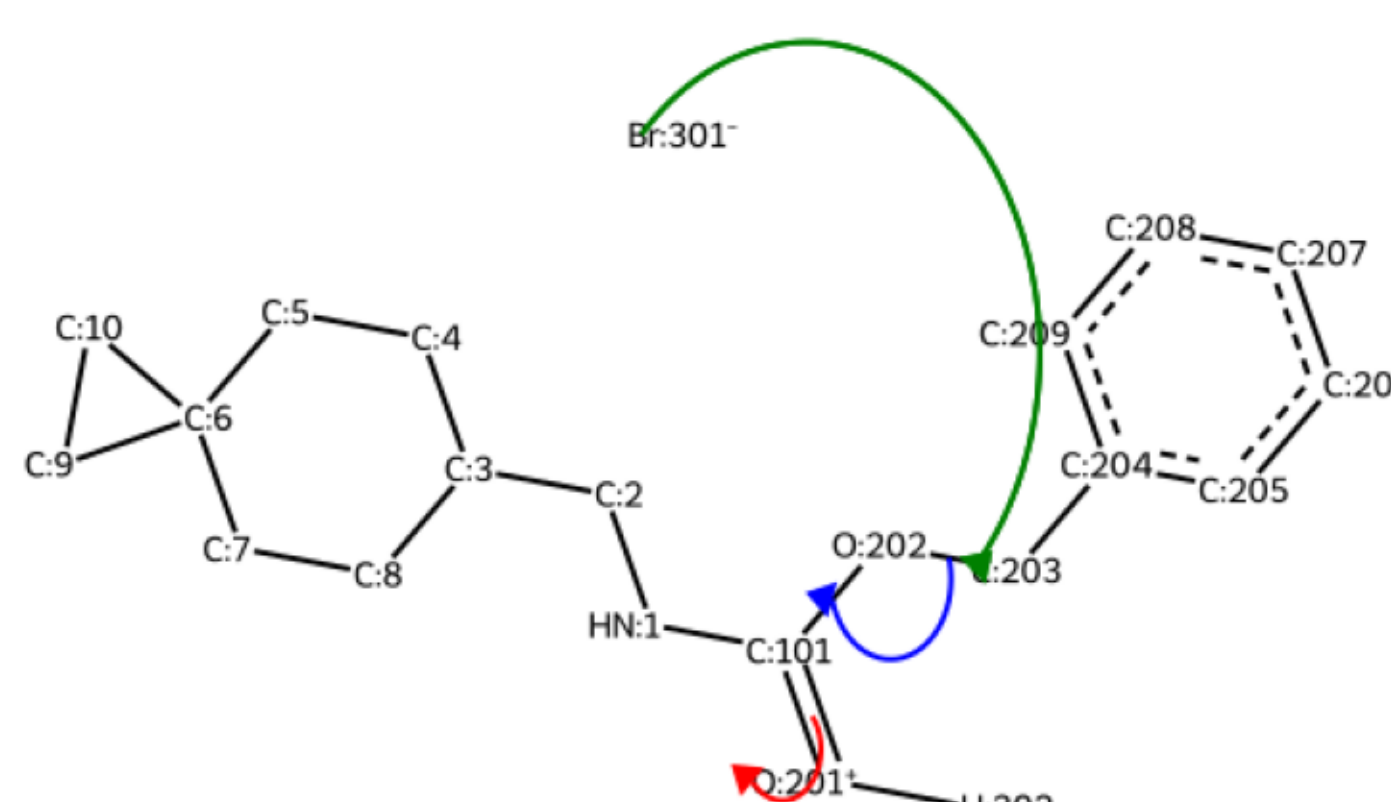

step #3

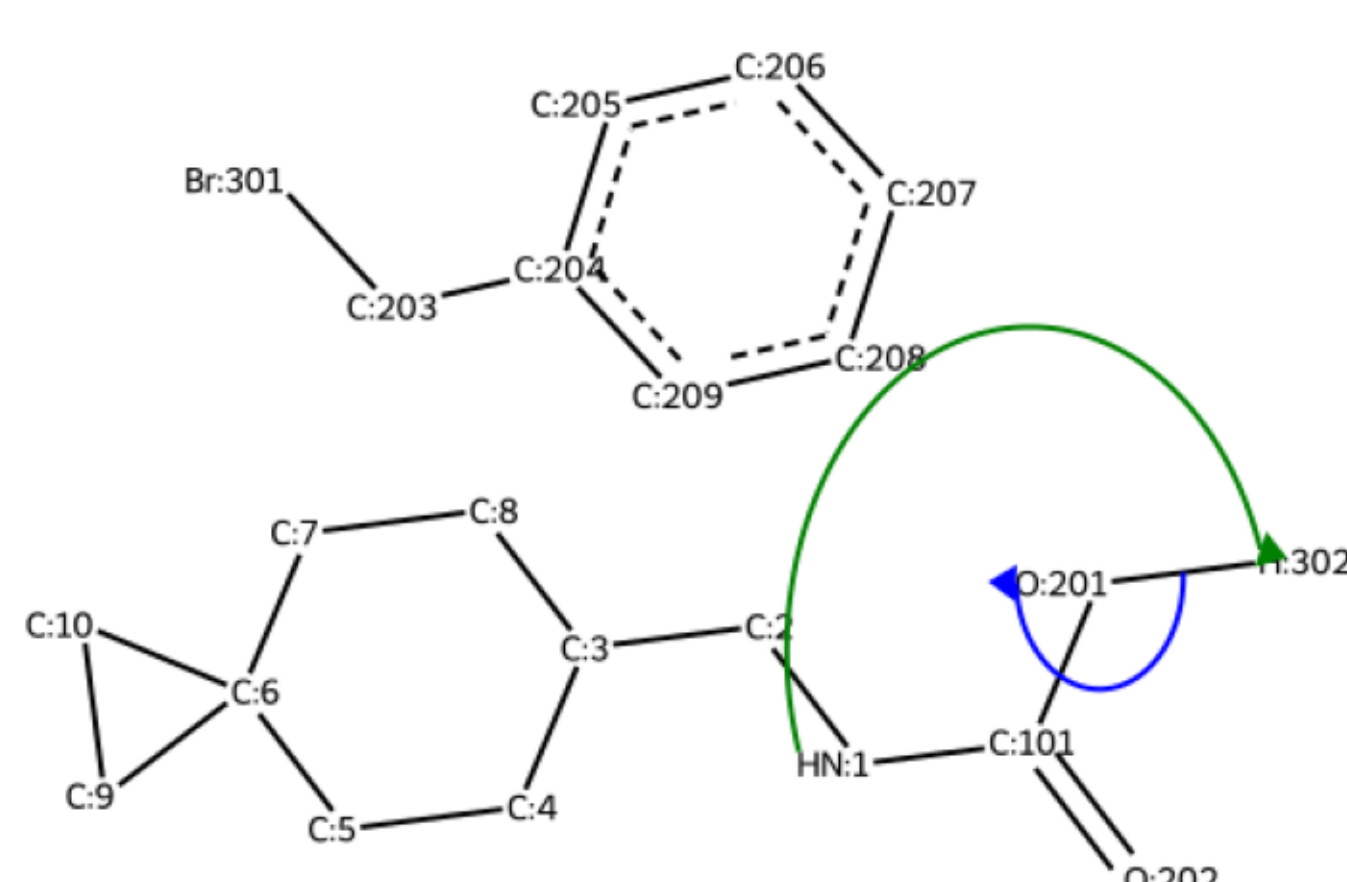

step #4

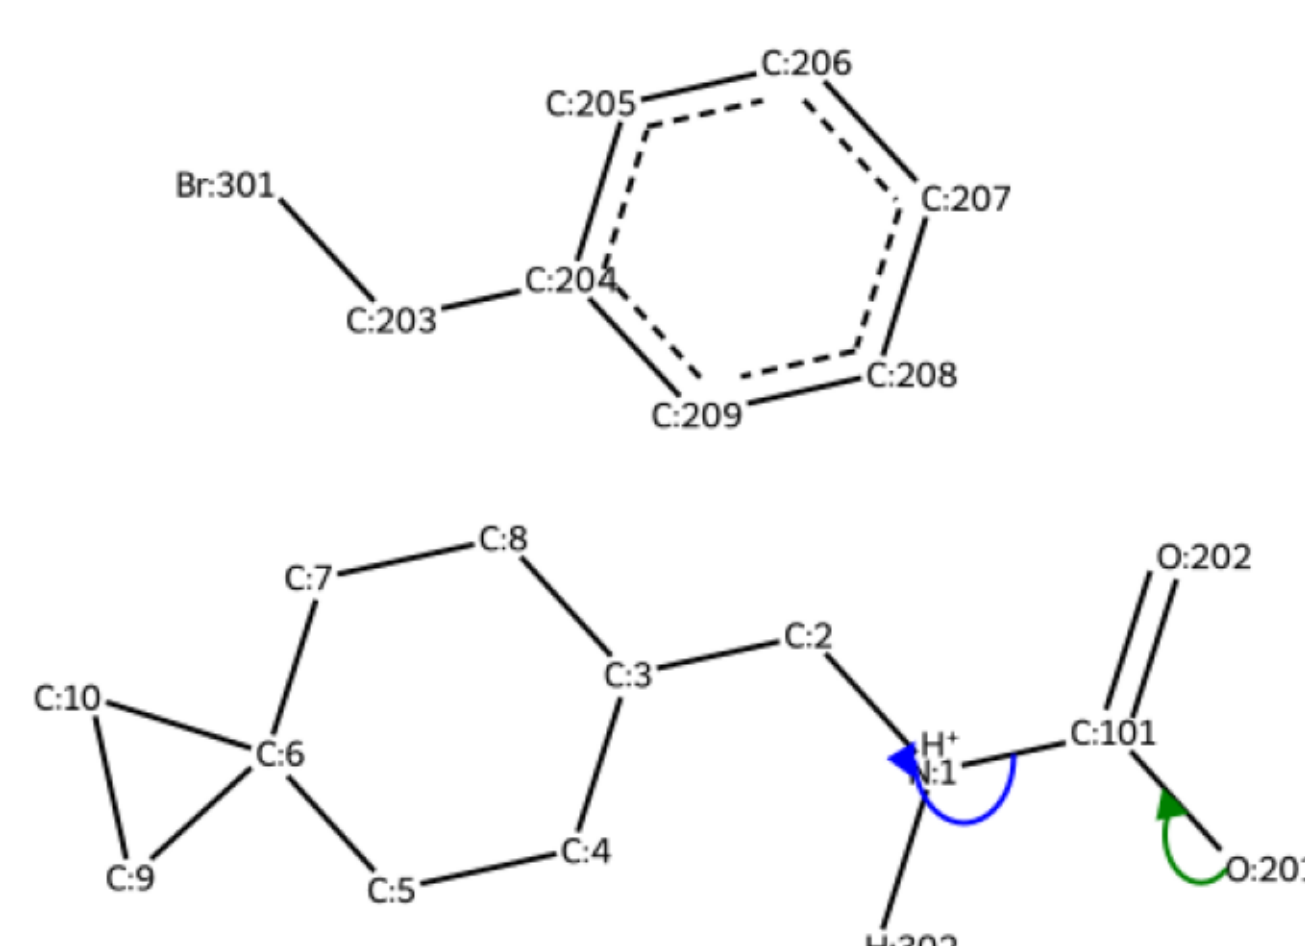

Product(s)

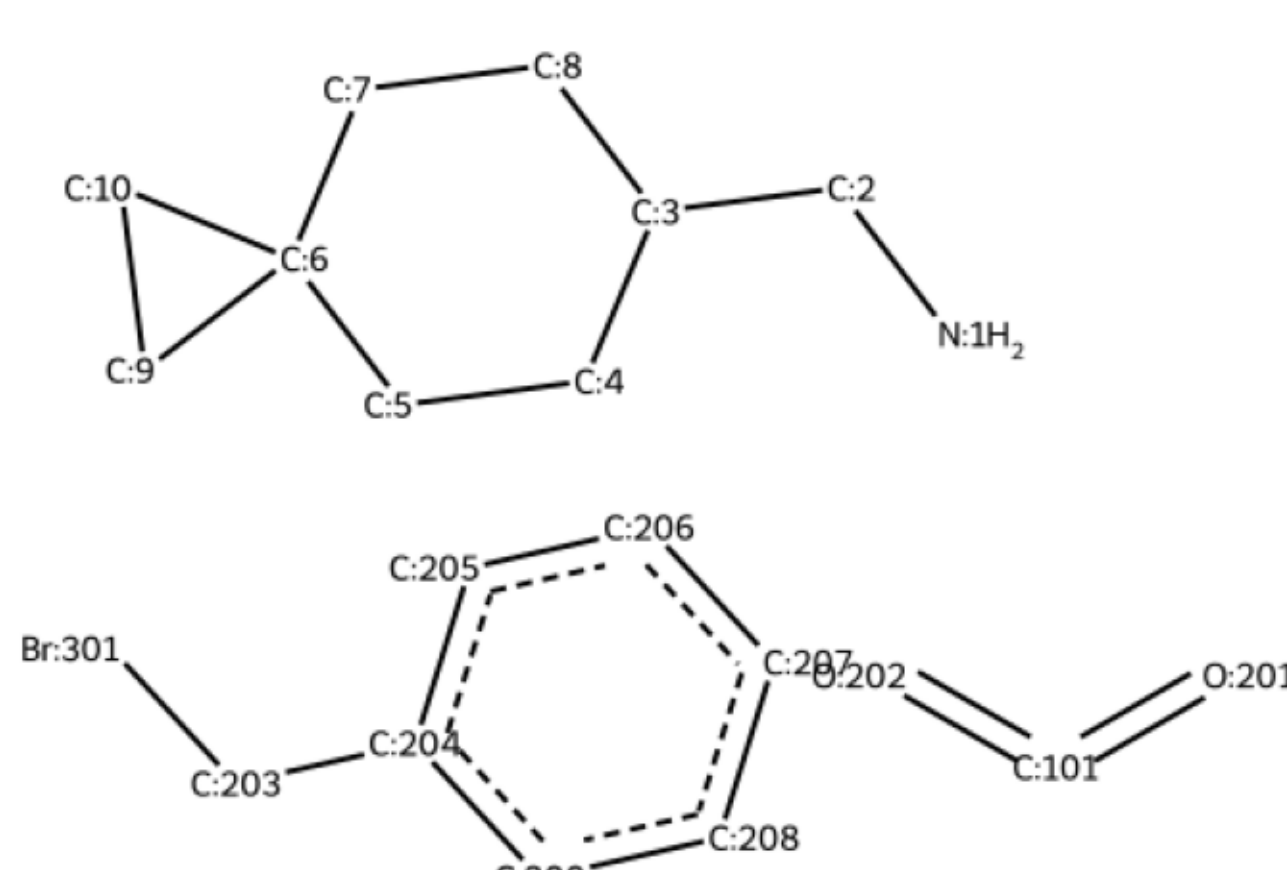



Original reaction  
sampled RXN\_ID:68)

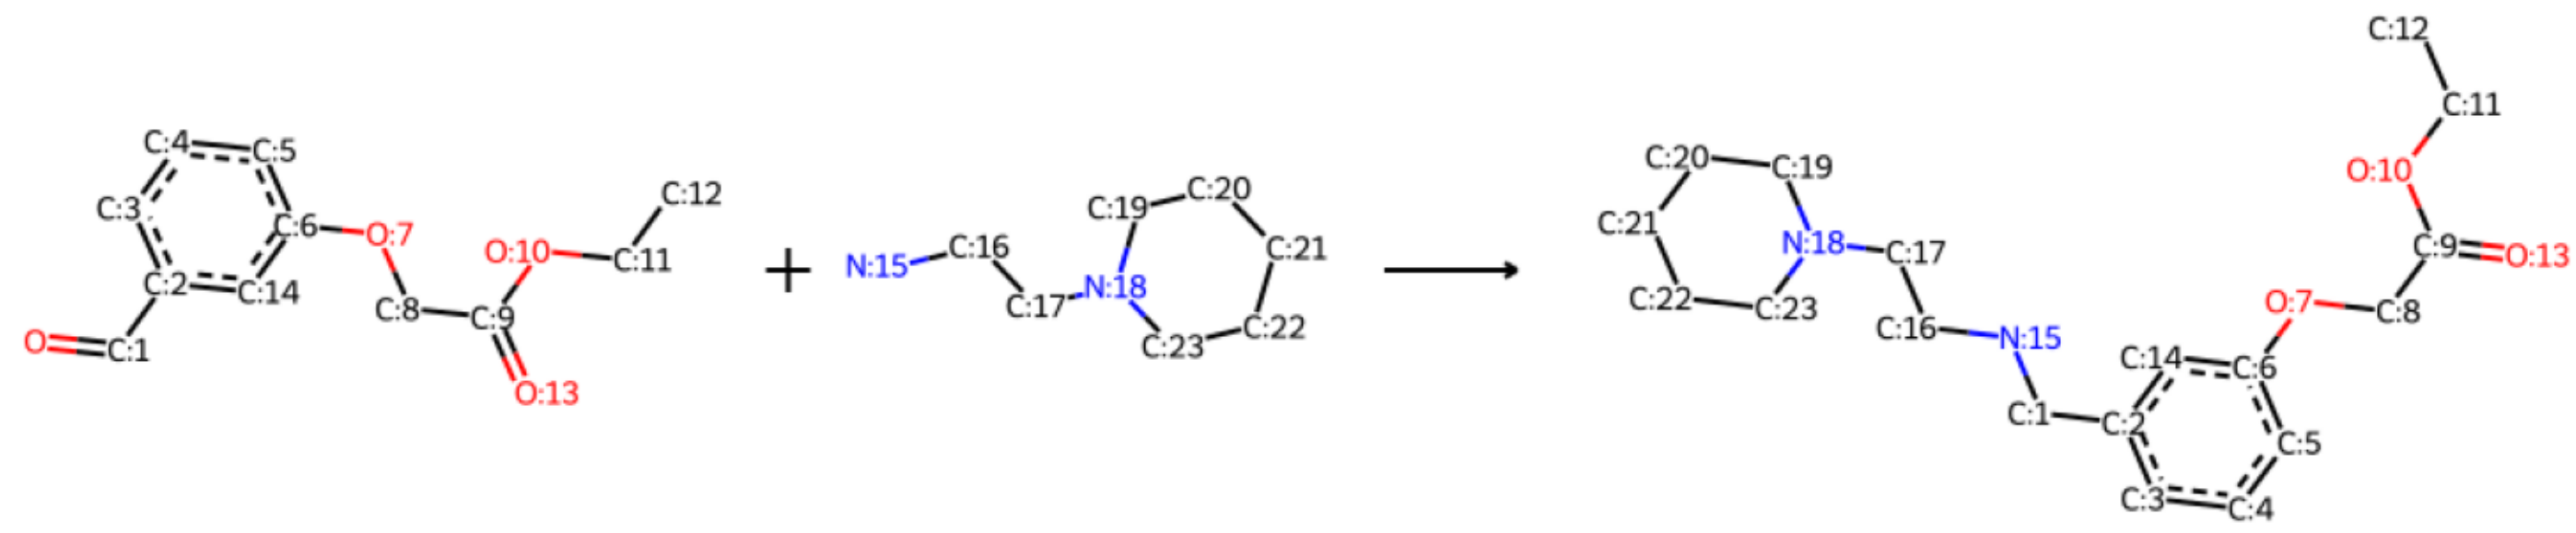

Identified mechanistic class -  
reductive\_amination reaction

Reaction with missing reagents recovered

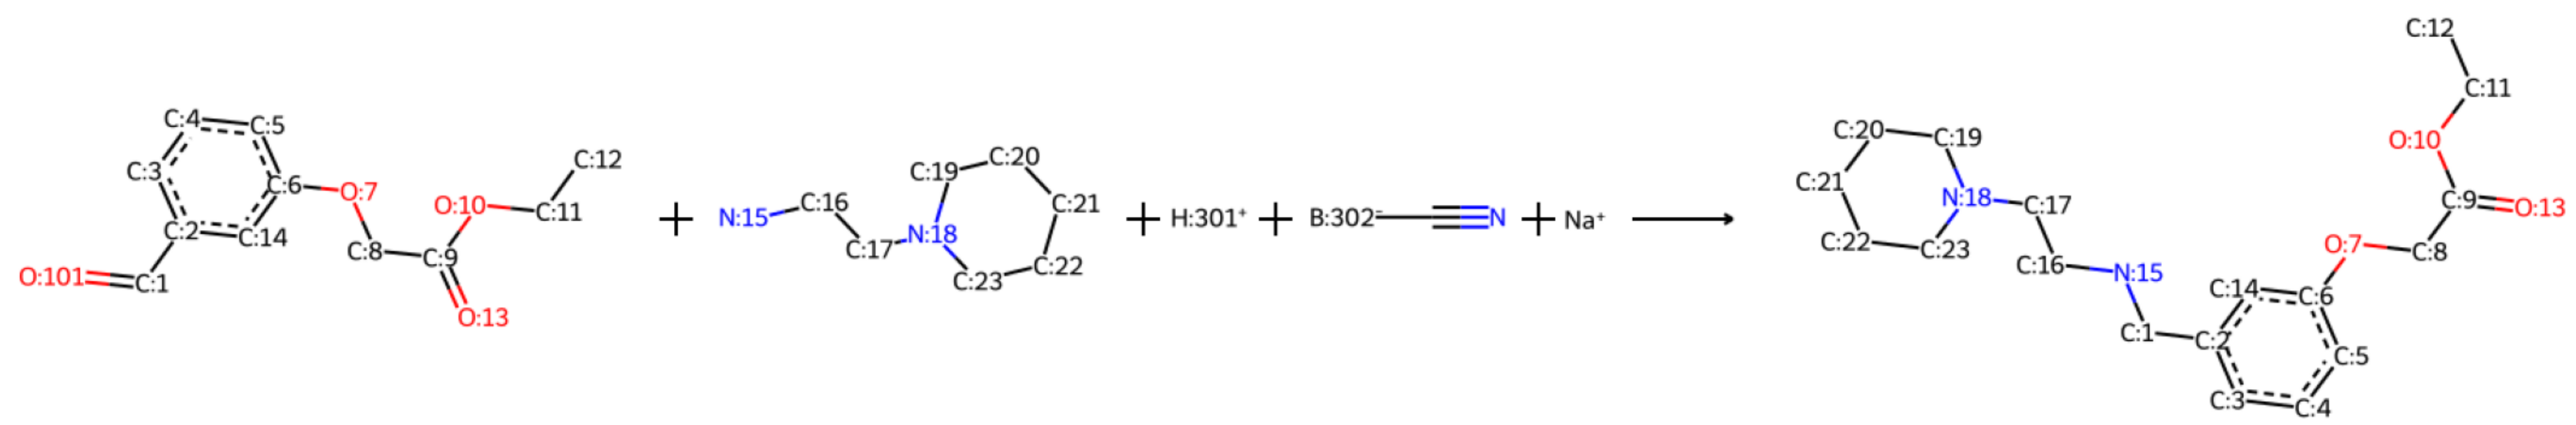

Proposed mechanistic pathway

[Arrow order: (1) green, (2) blue, (3) red, (4) orange]

step #1

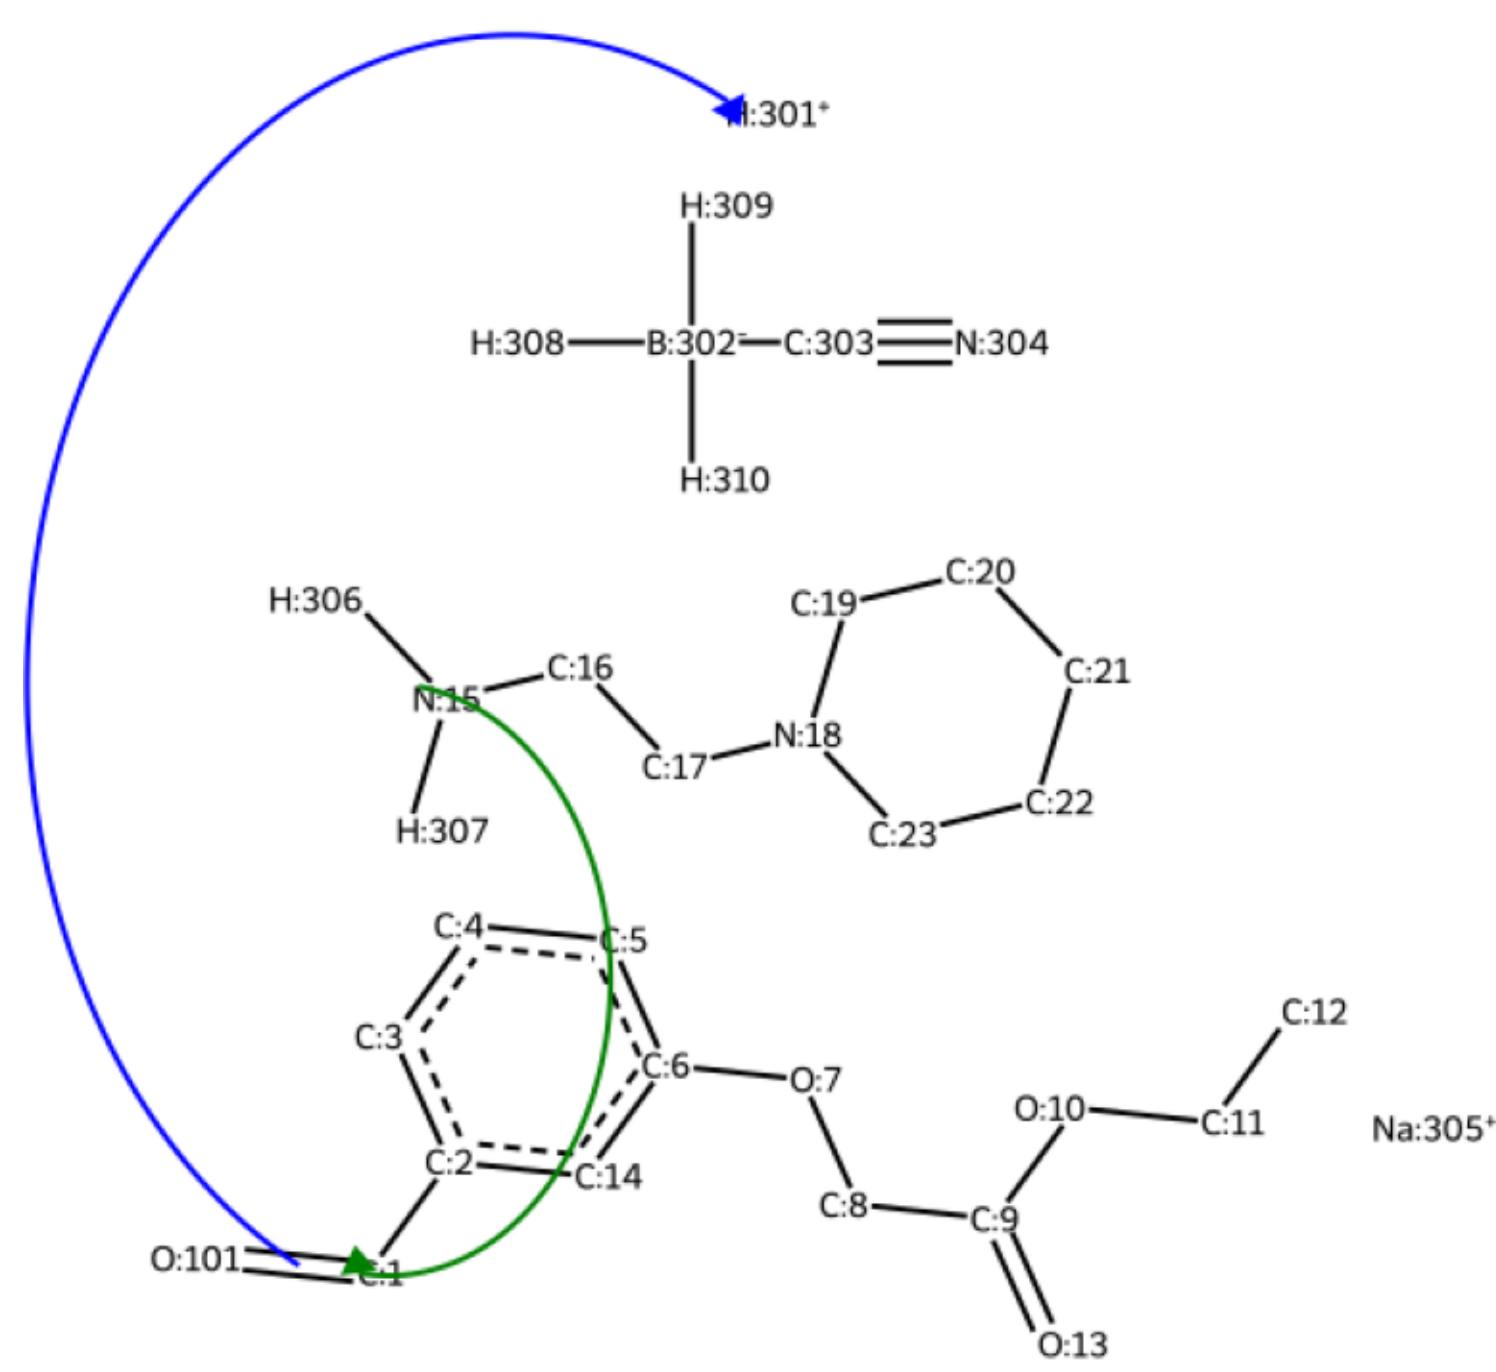

step #2

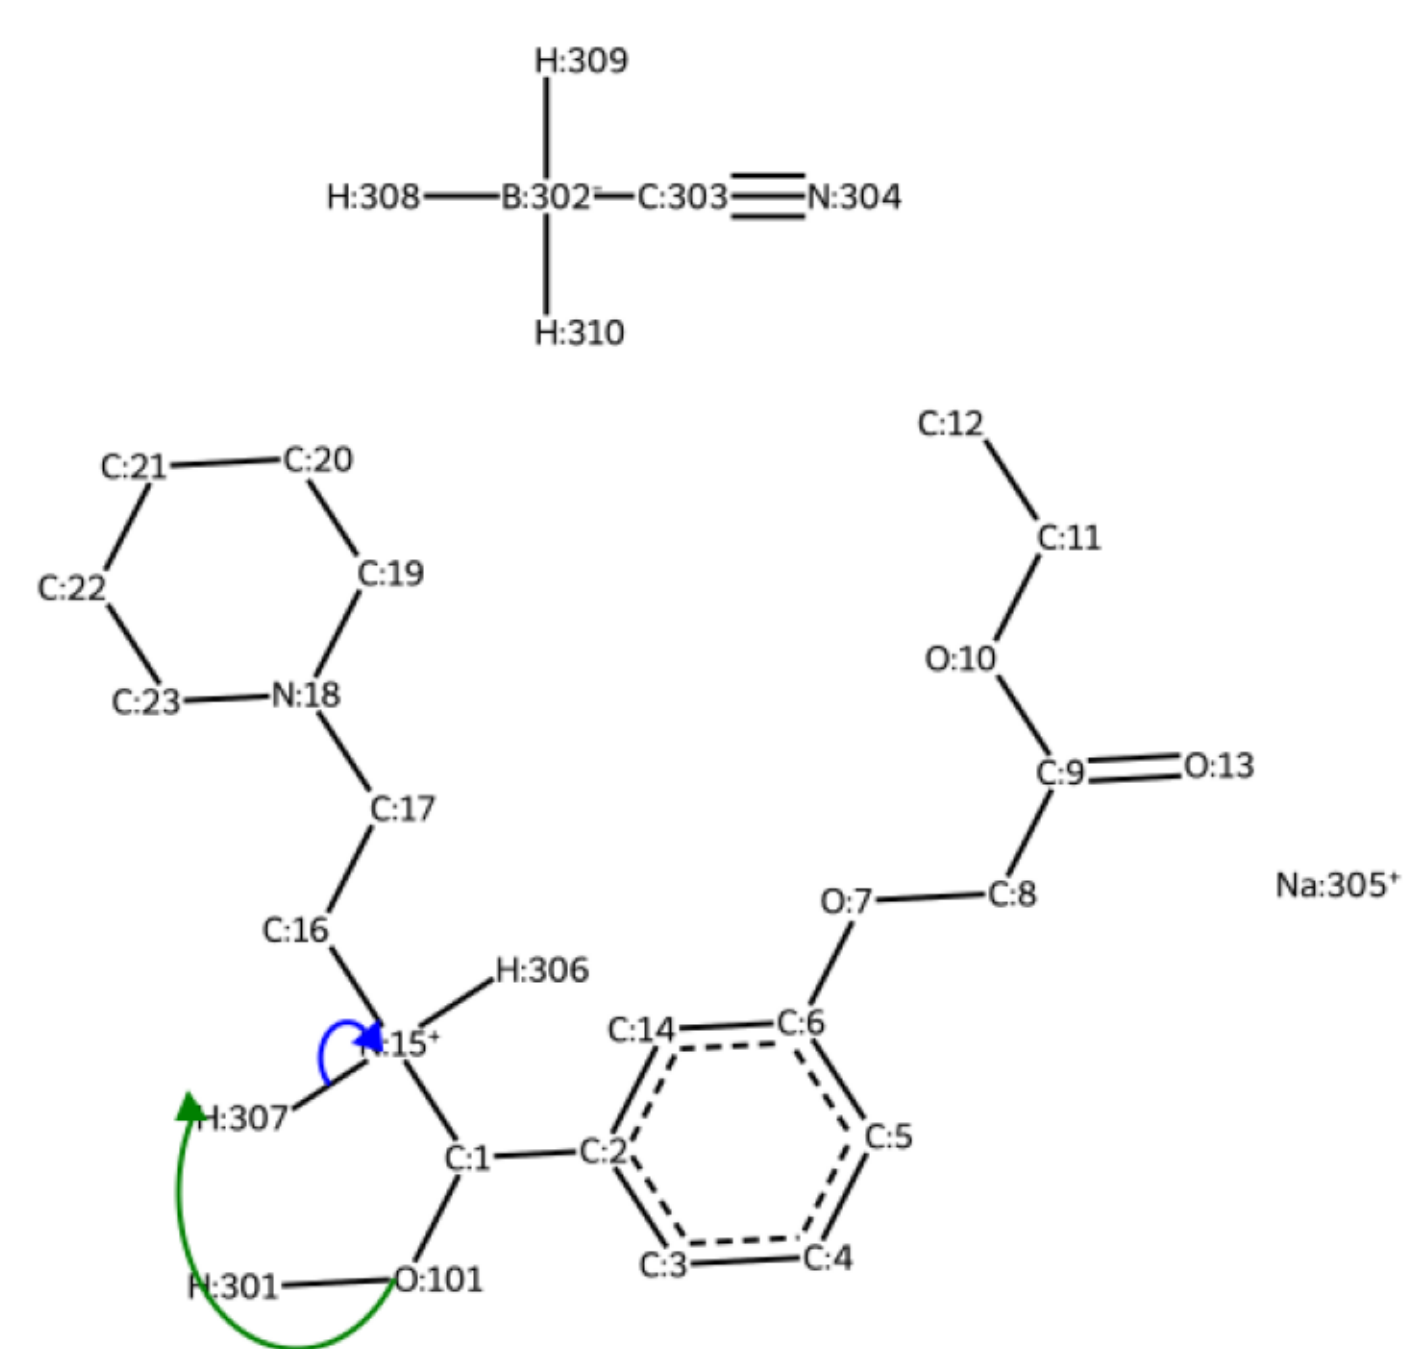

step #3

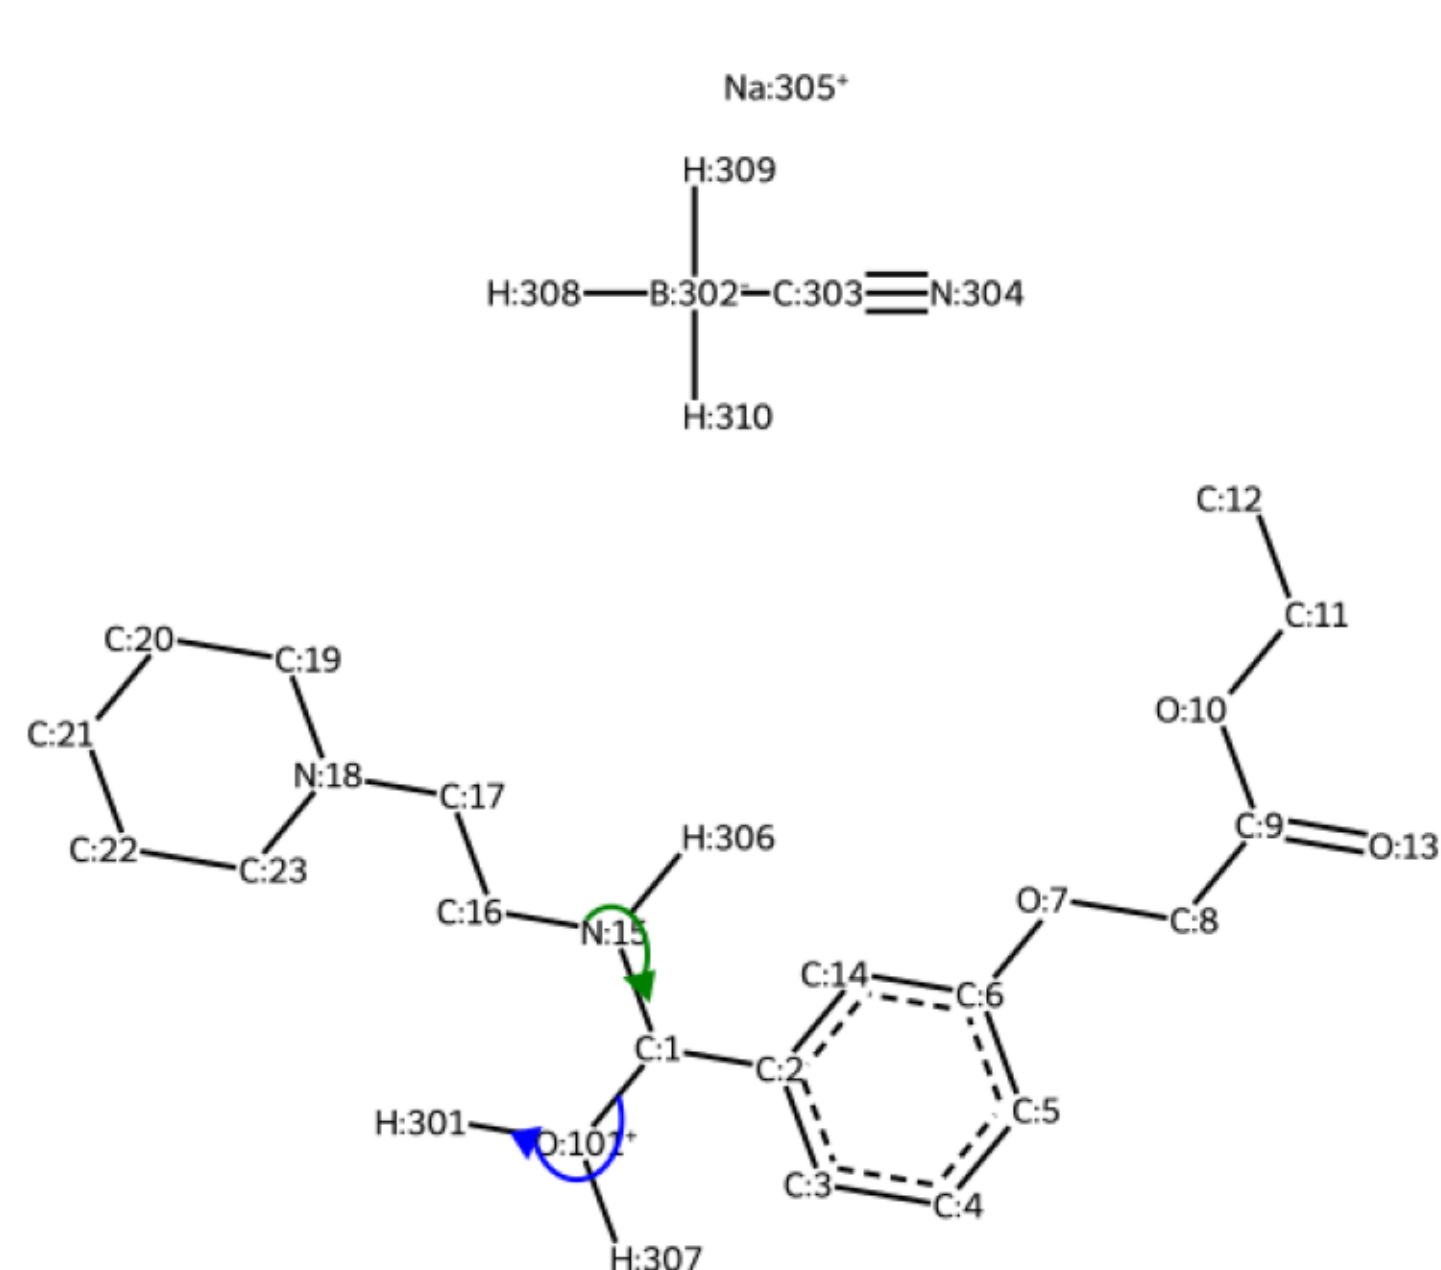

step #4

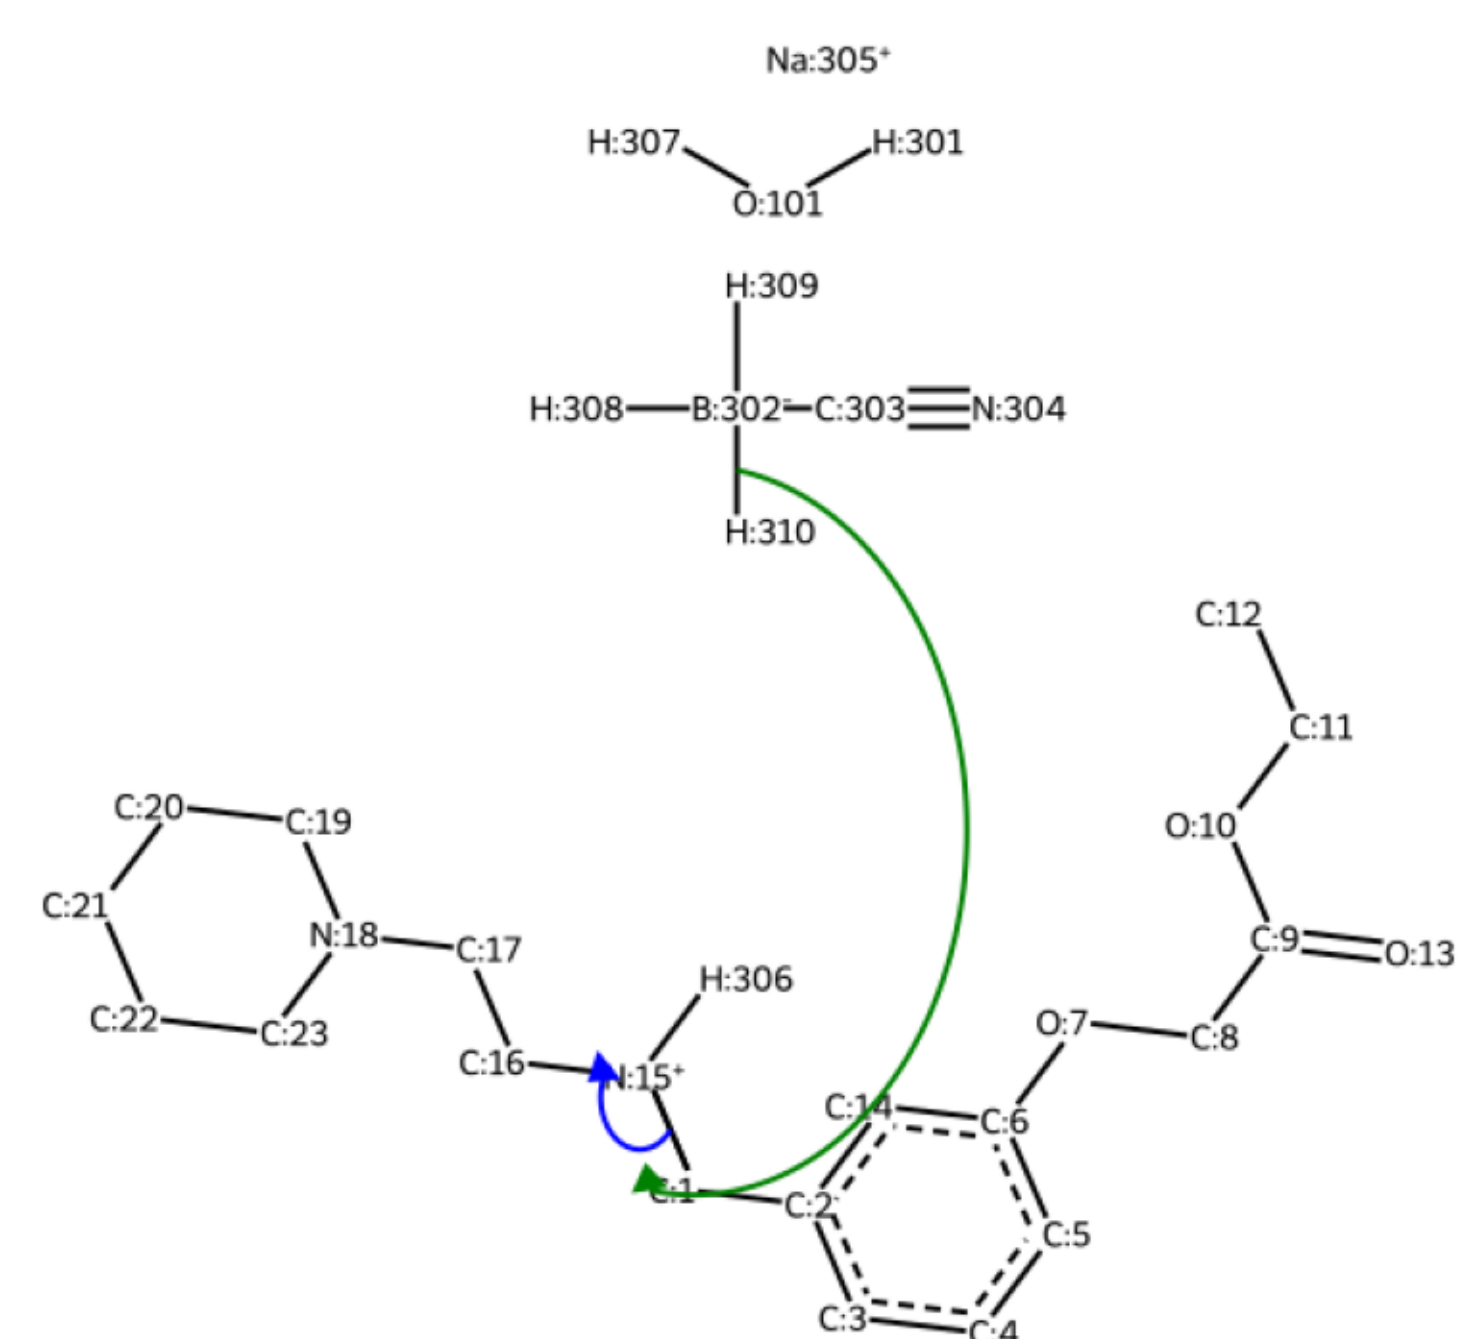

Product(s)

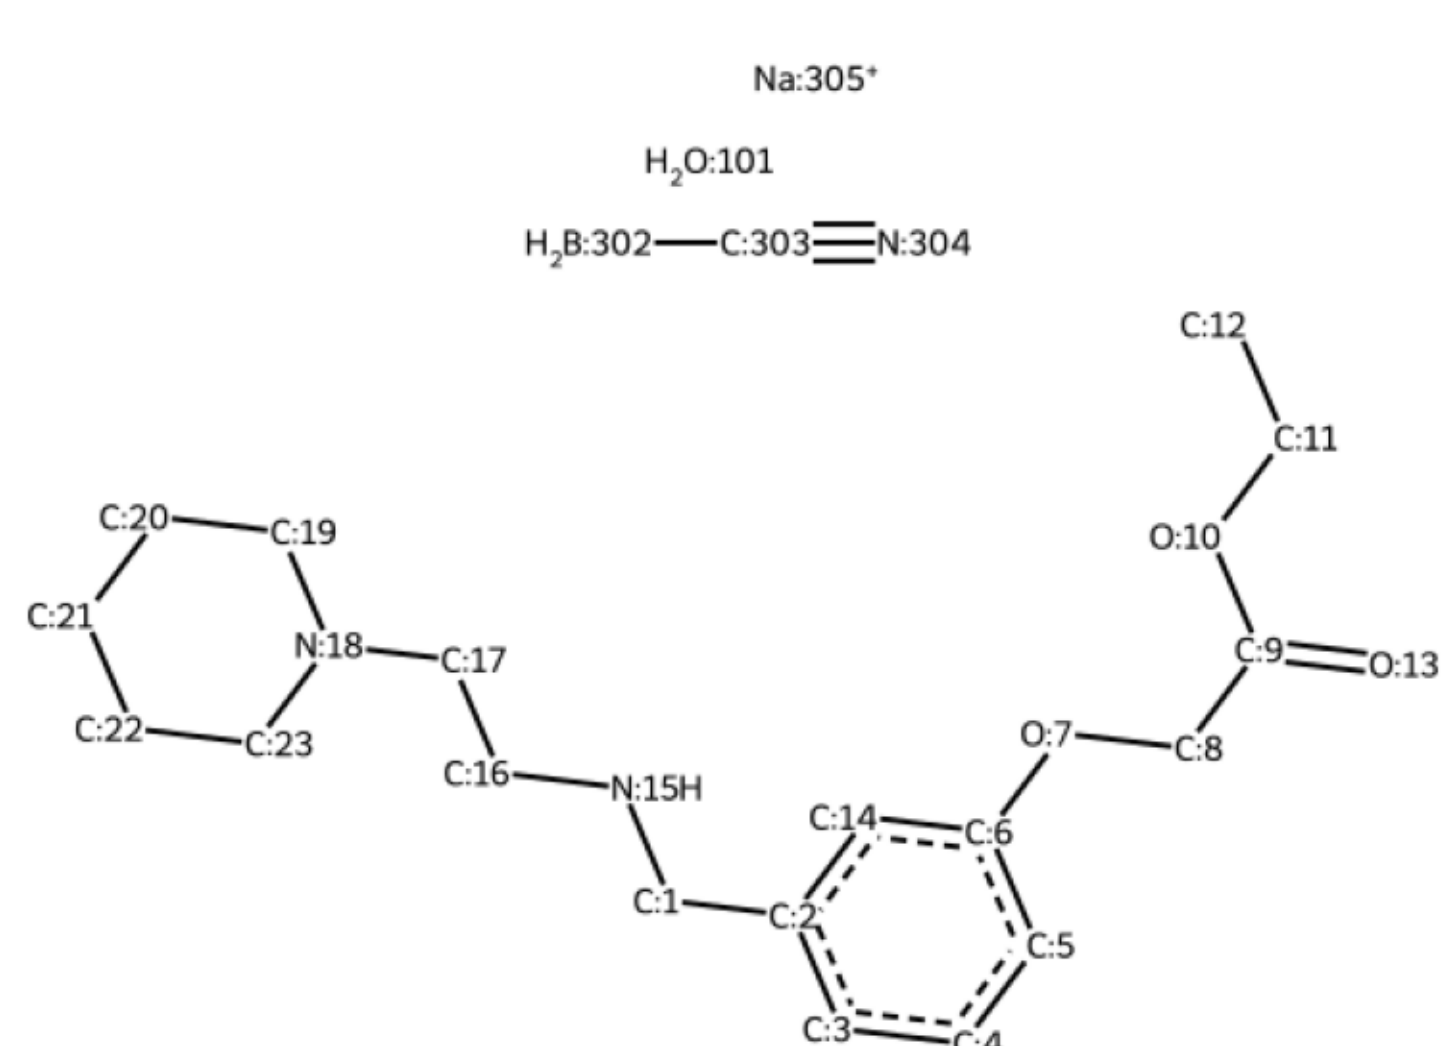



Original reaction  
sampled RXN\_ID:69)

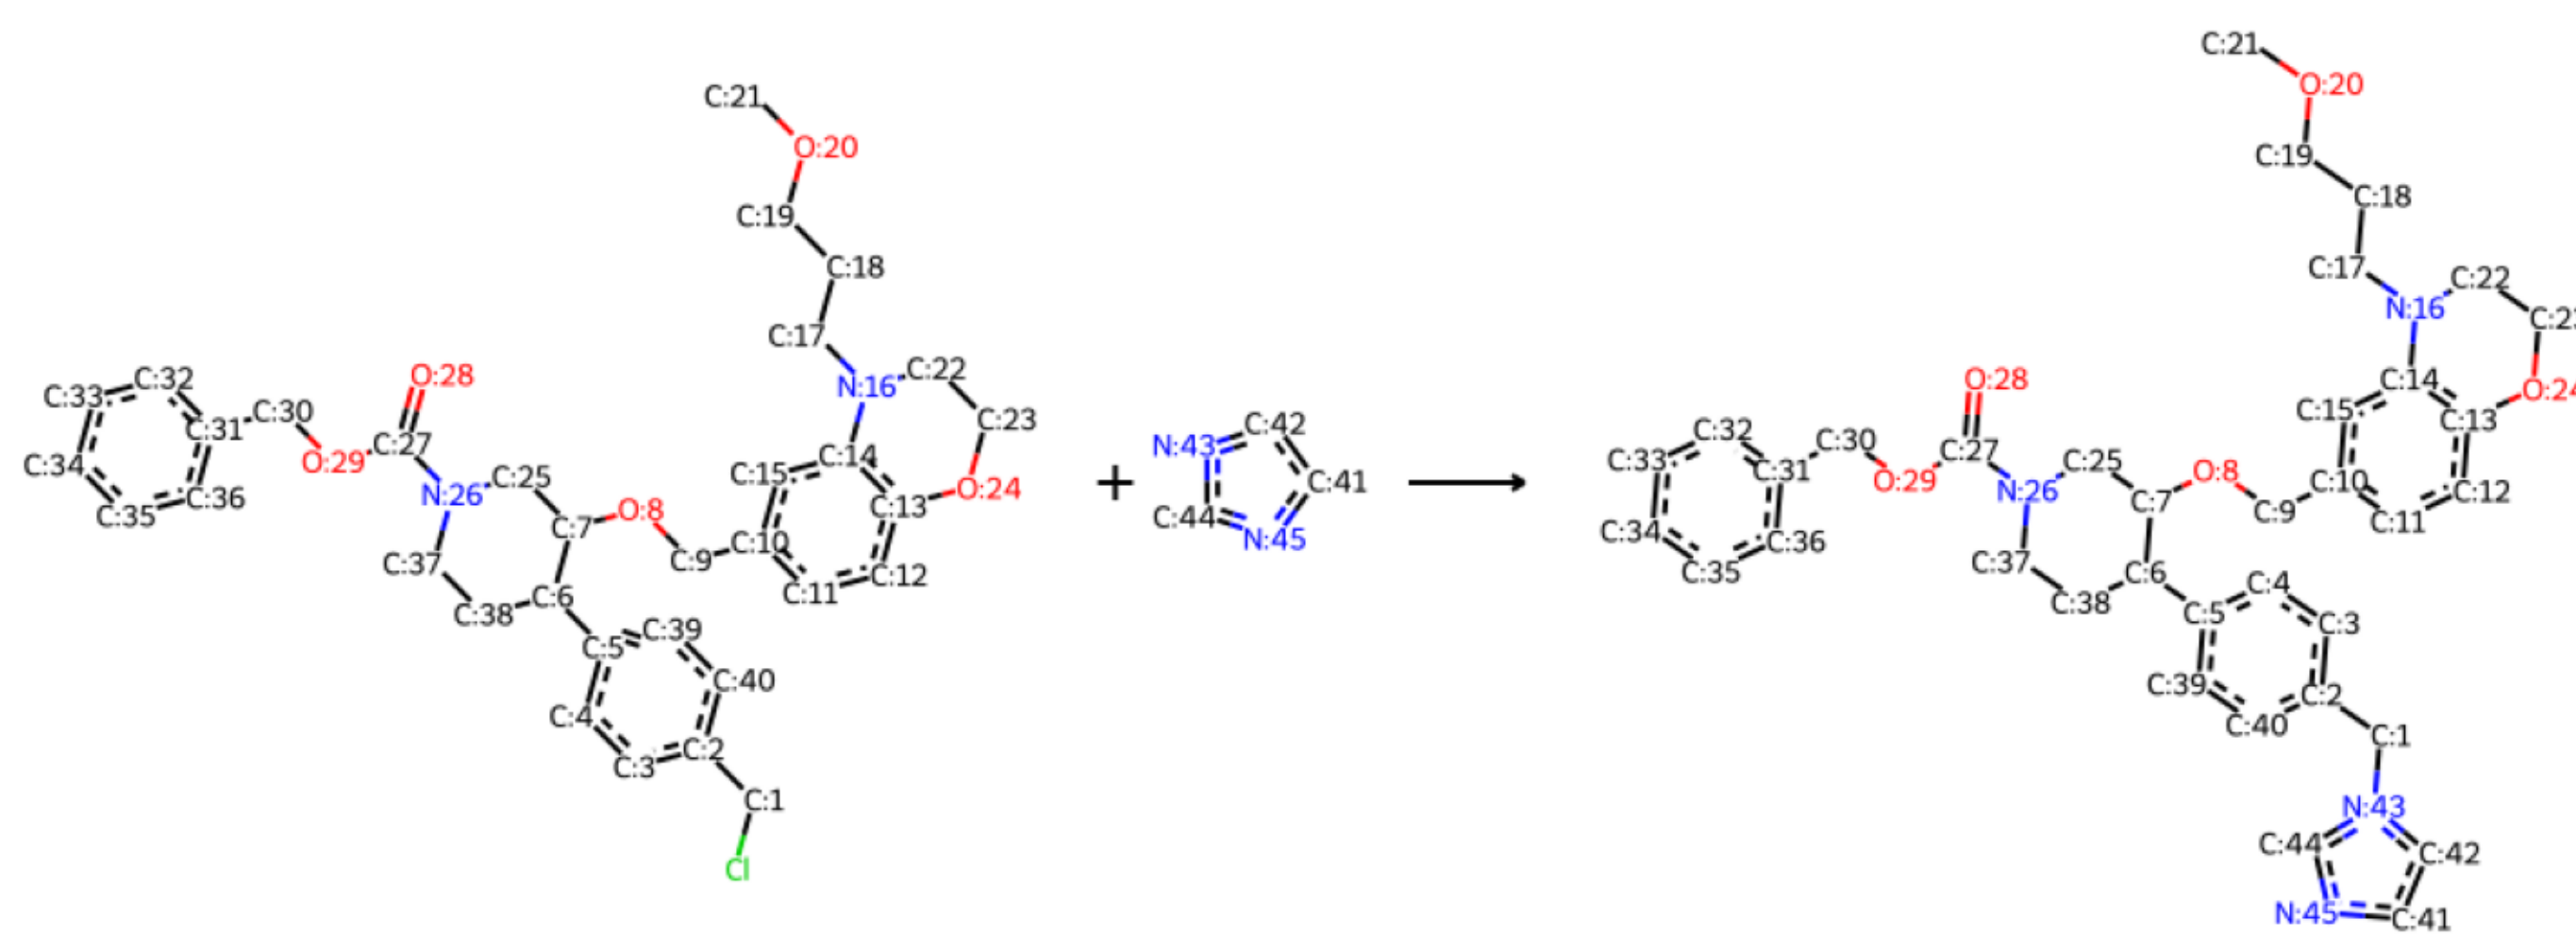

Identified mechanistic class -  
SN2 reaction

Reaction with missing reagents recovered

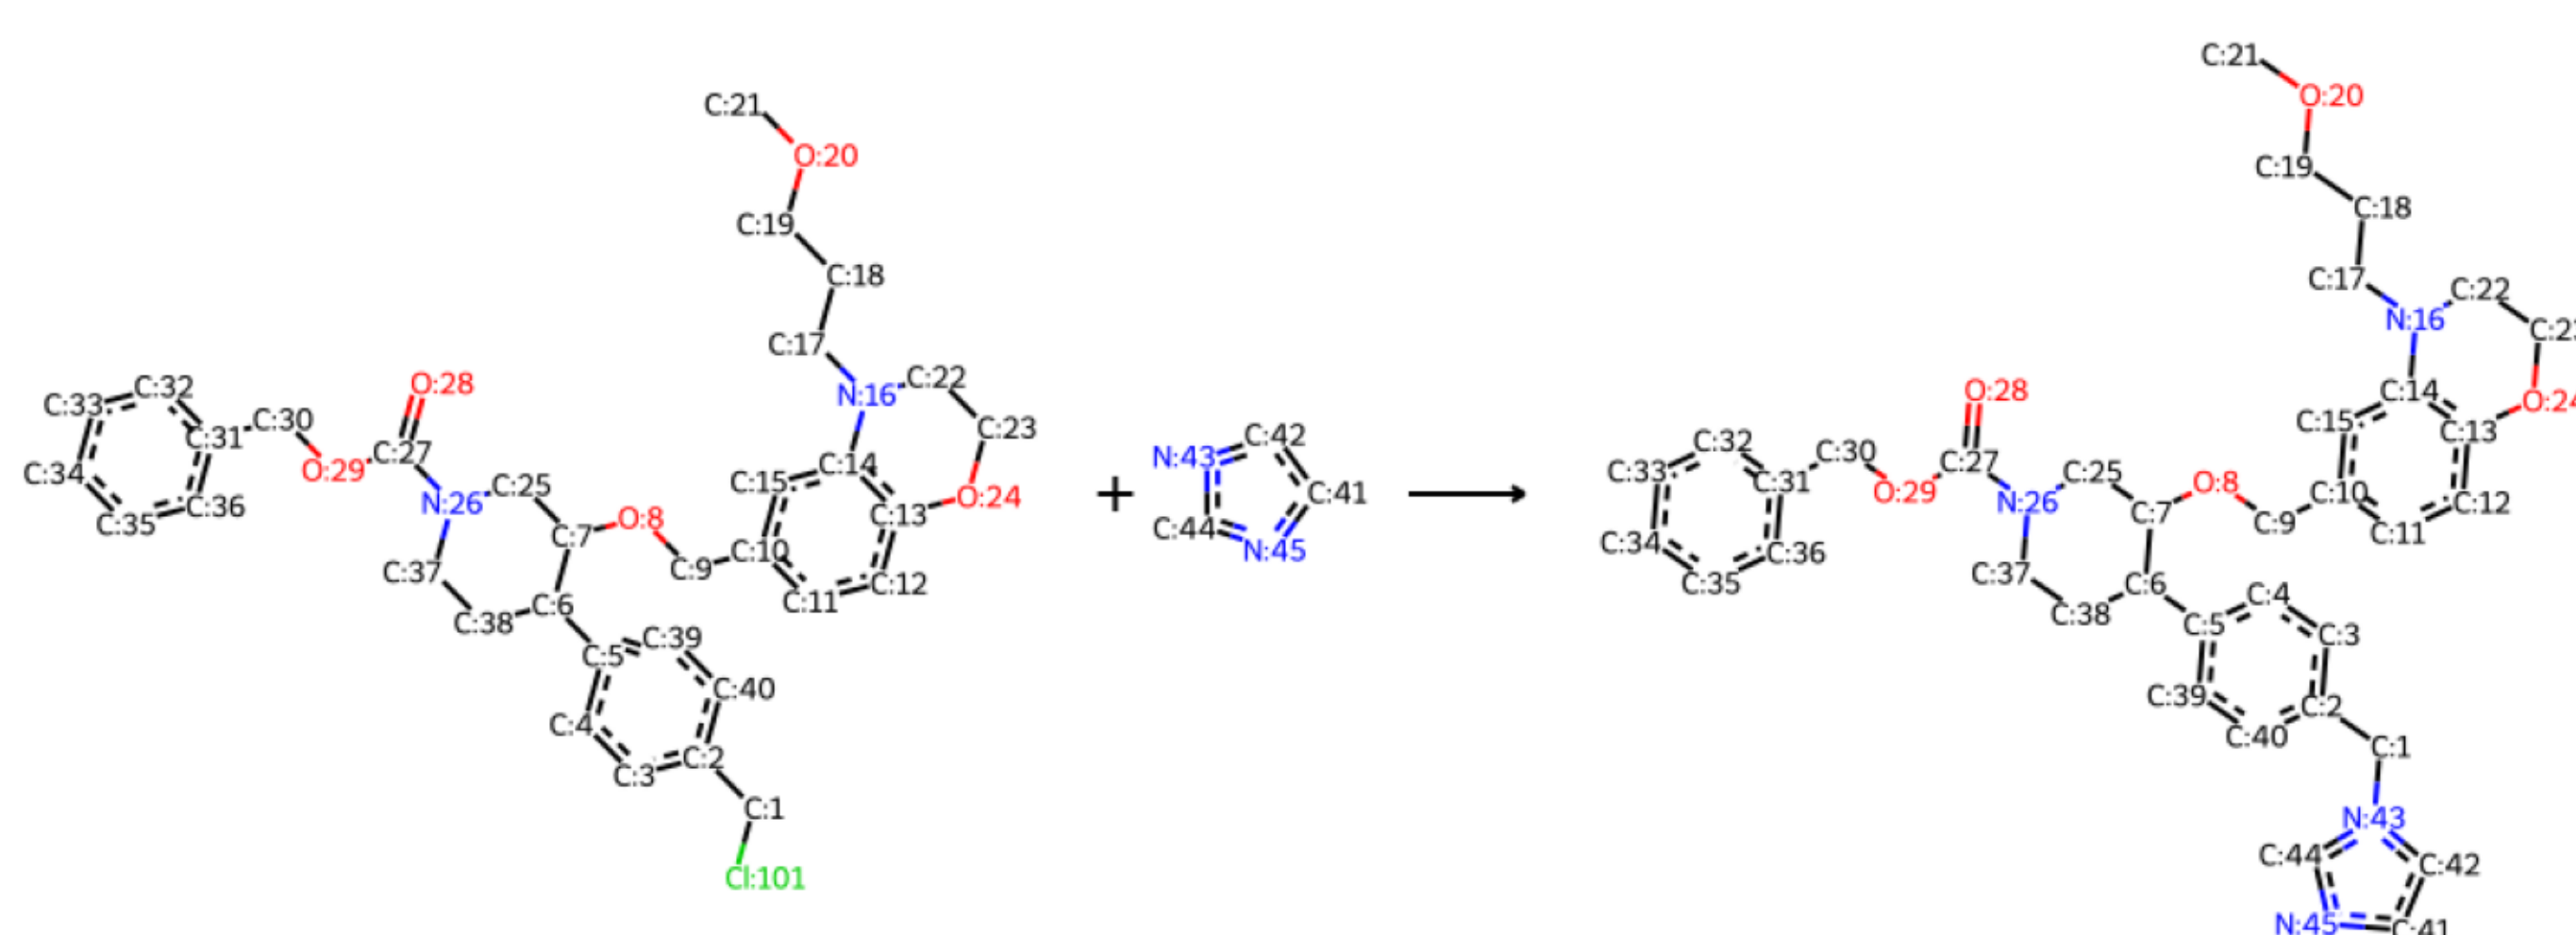

Proposed mechanistic pathway

[Arrow order: (1) green, (2) blue, (3) red, (4) orange]

step #1

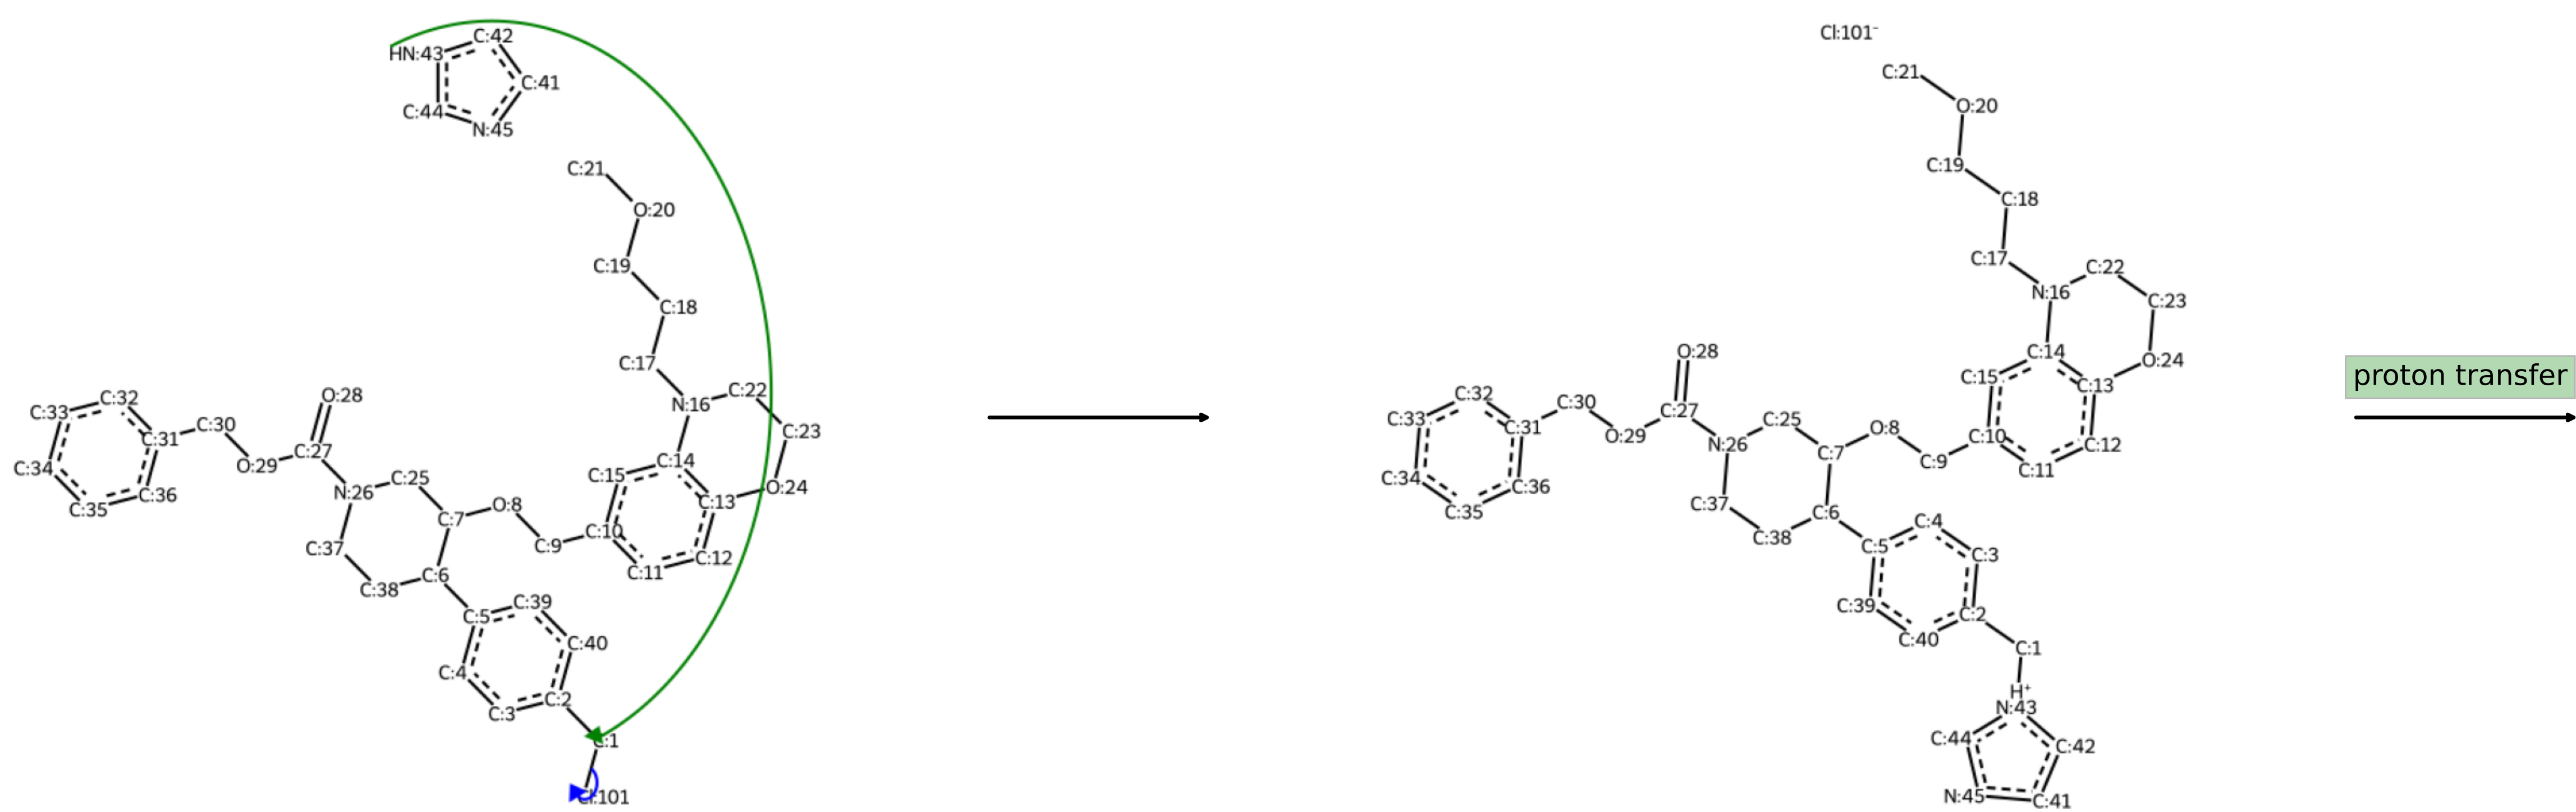

Product(s)

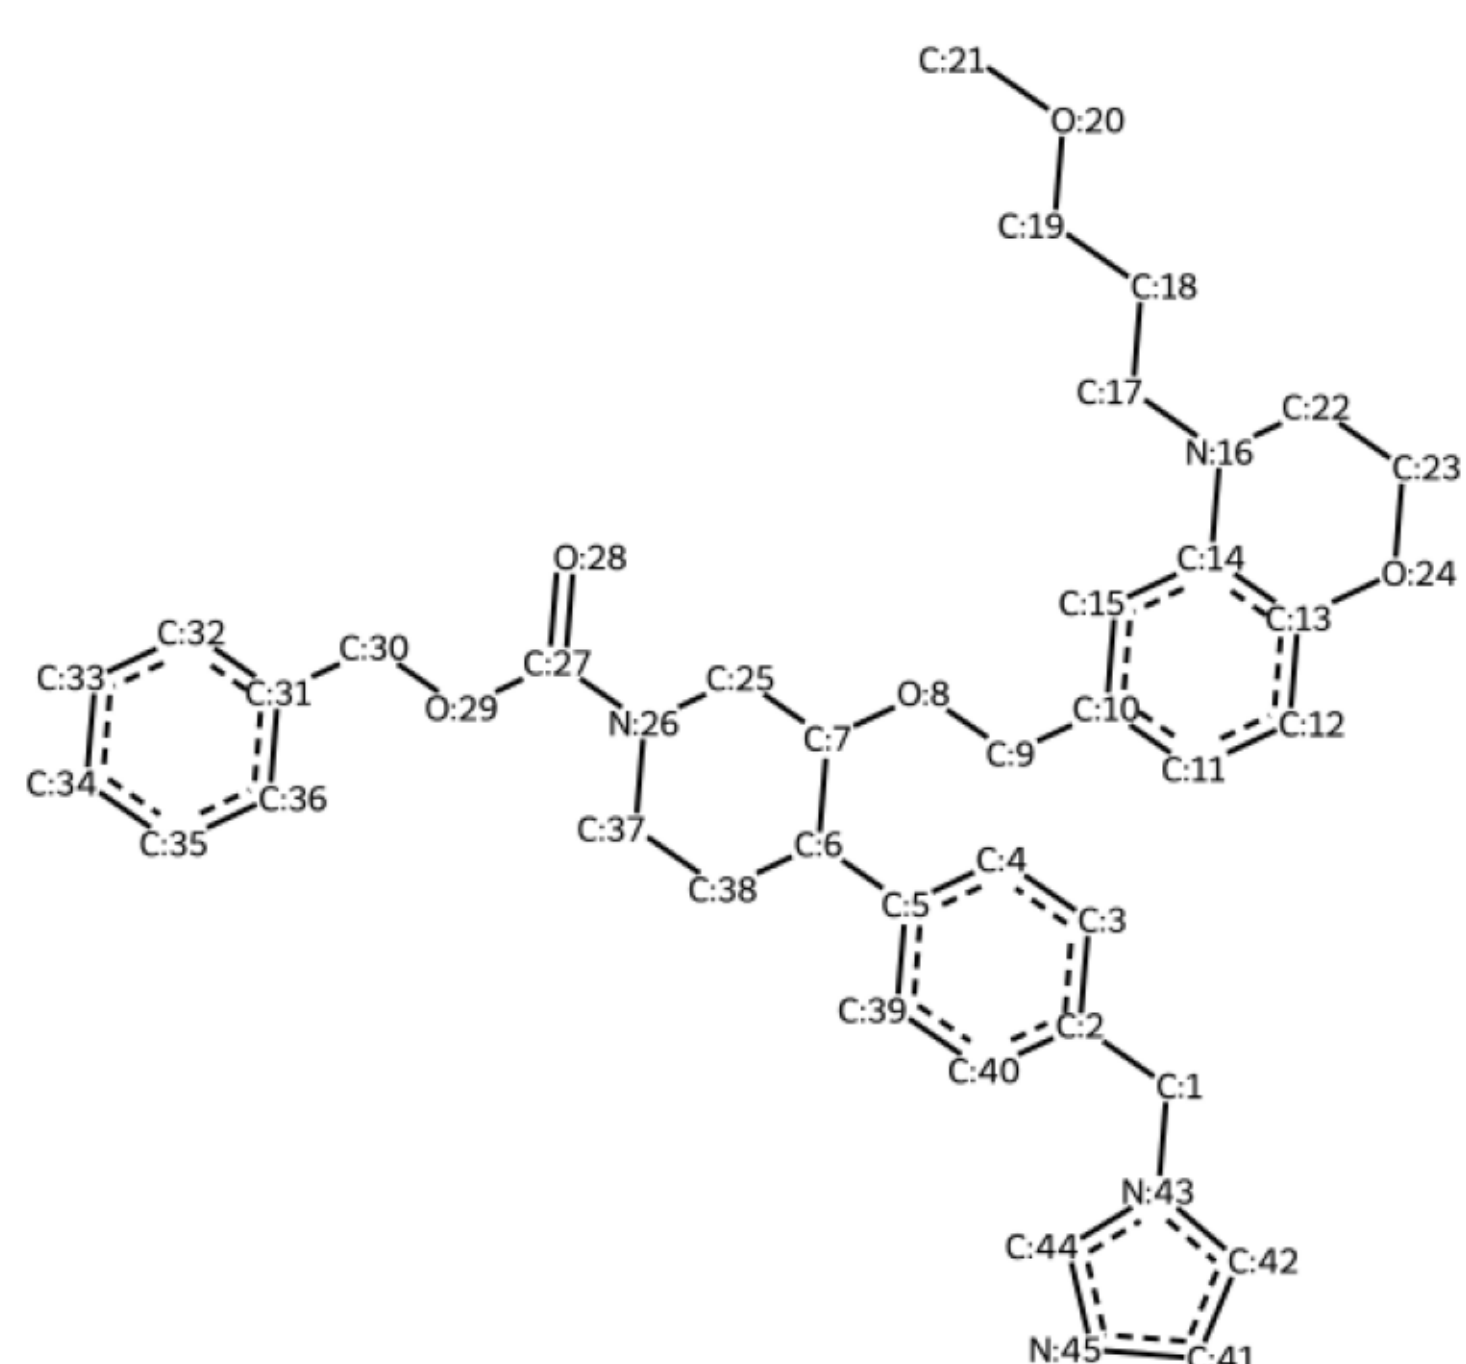



# Original reaction sampled RXN\_ID:70)

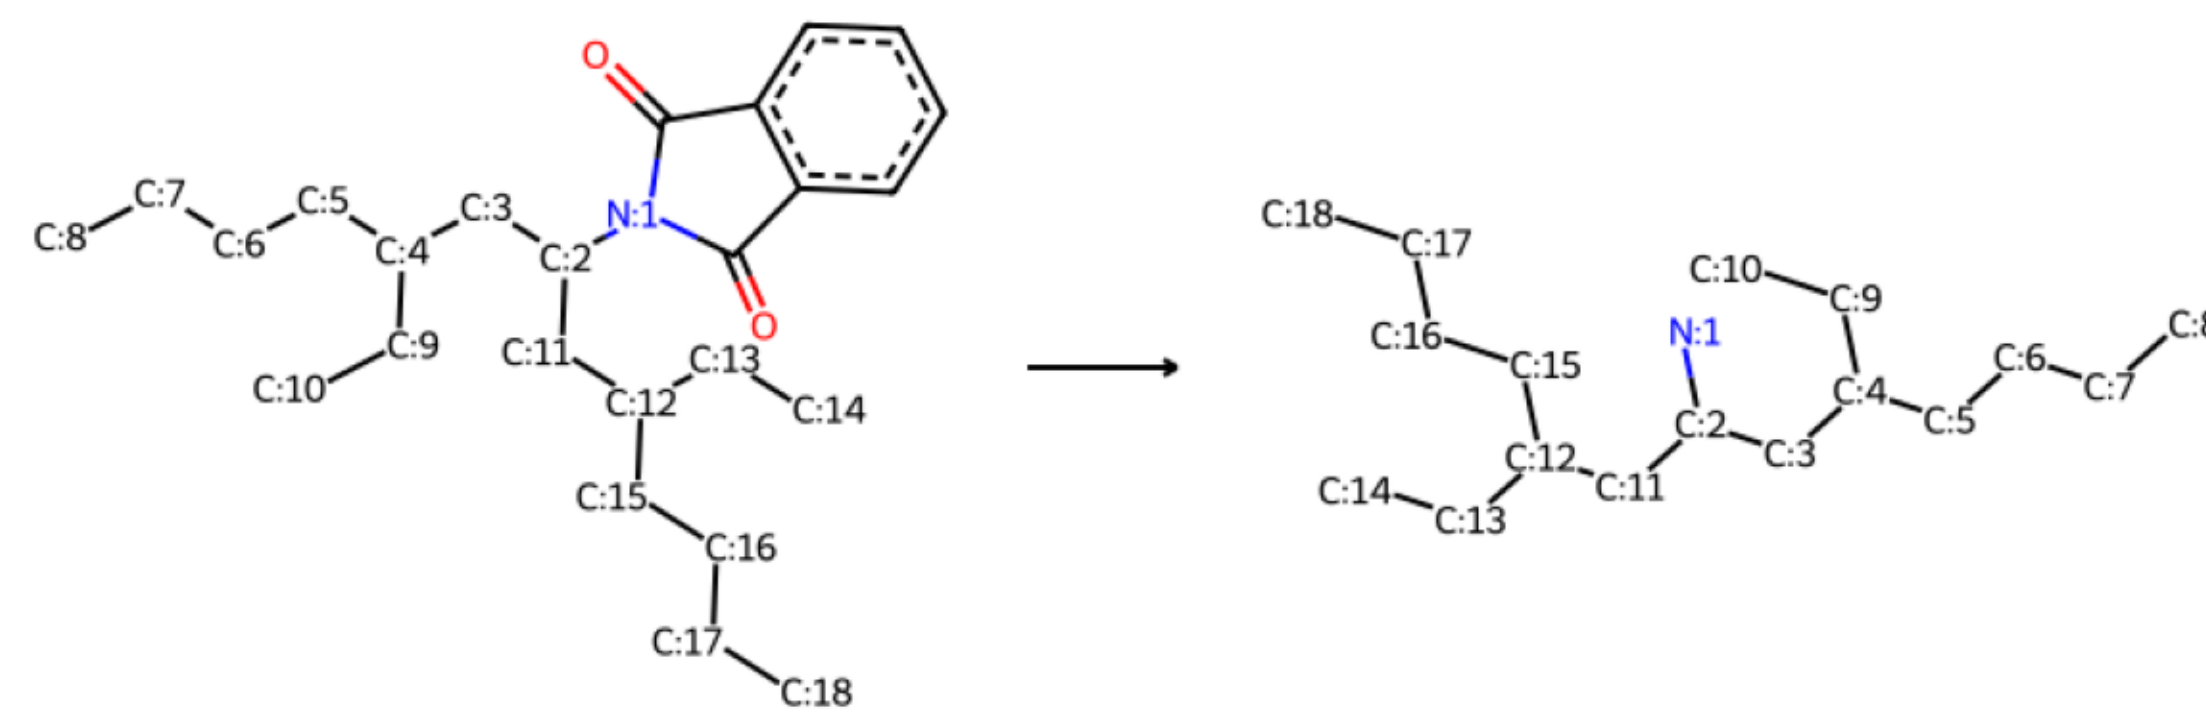

Identified mechanistic class -  
Ing\_Manske reaction

## Reaction with missing reagents recovered

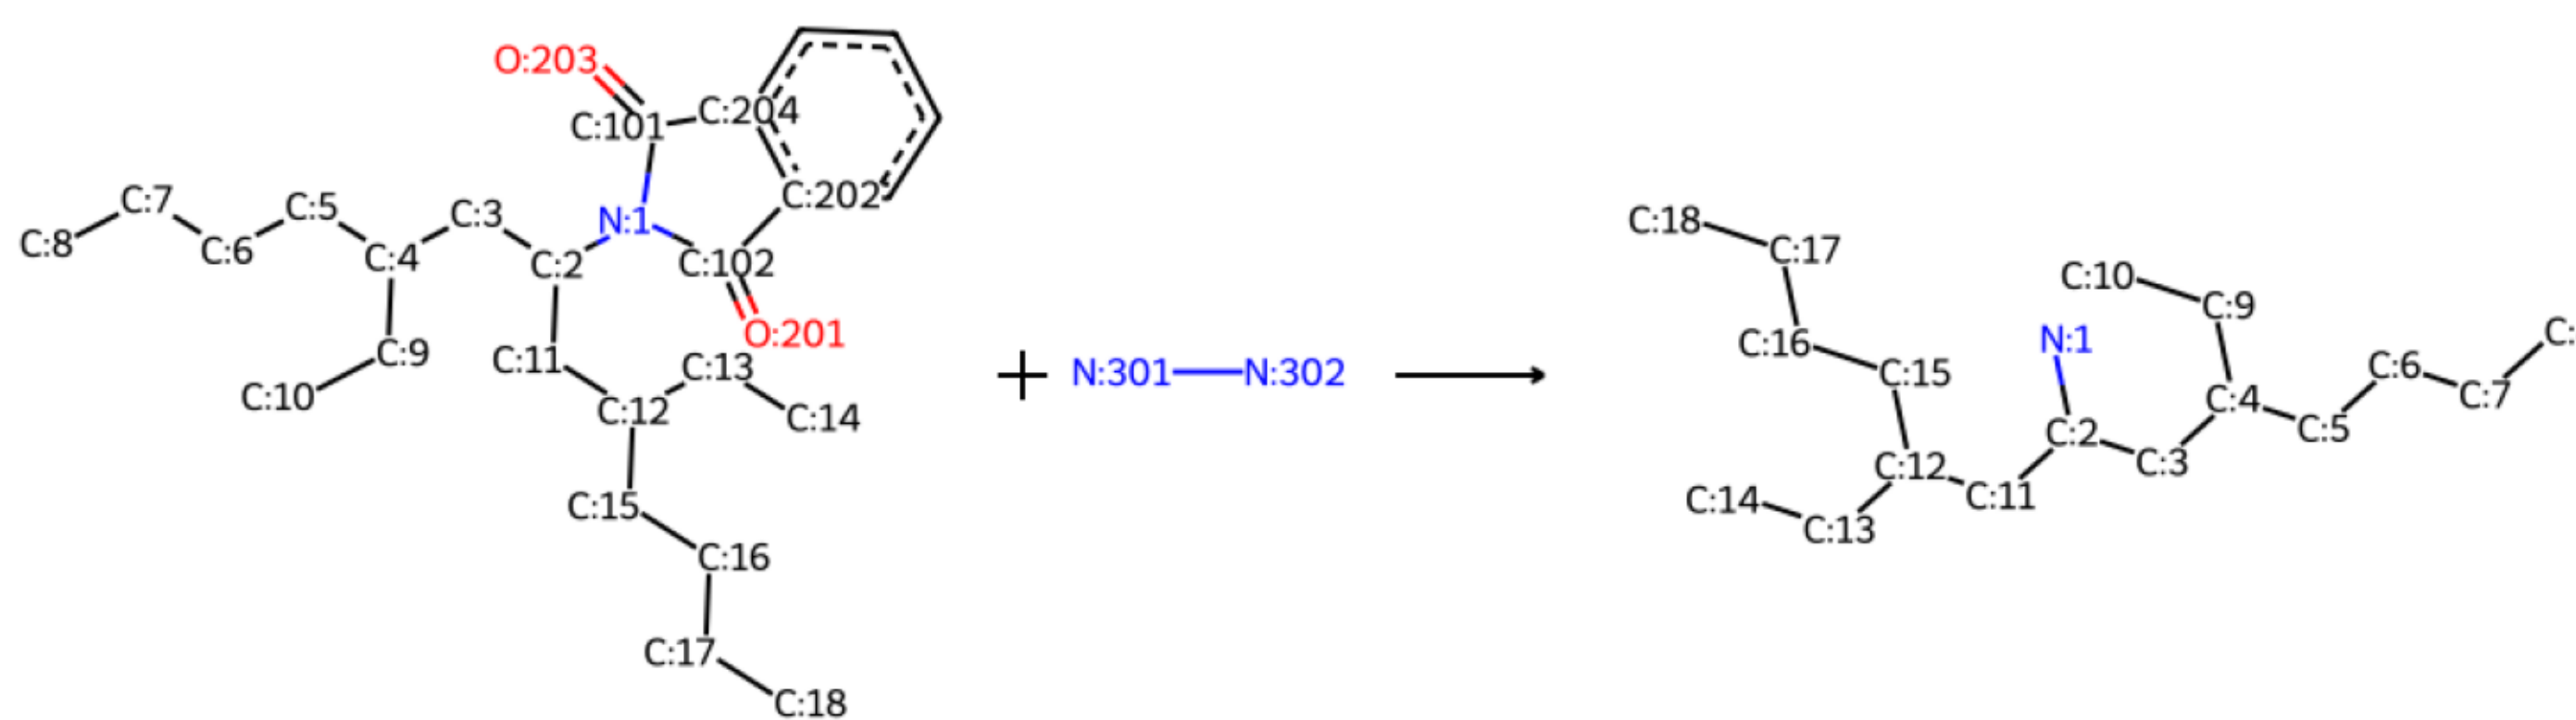

## Proposed mechanistic pathway

[Arrow order: (1) green, (2) blue, (3) red, (4) orange]

step #1

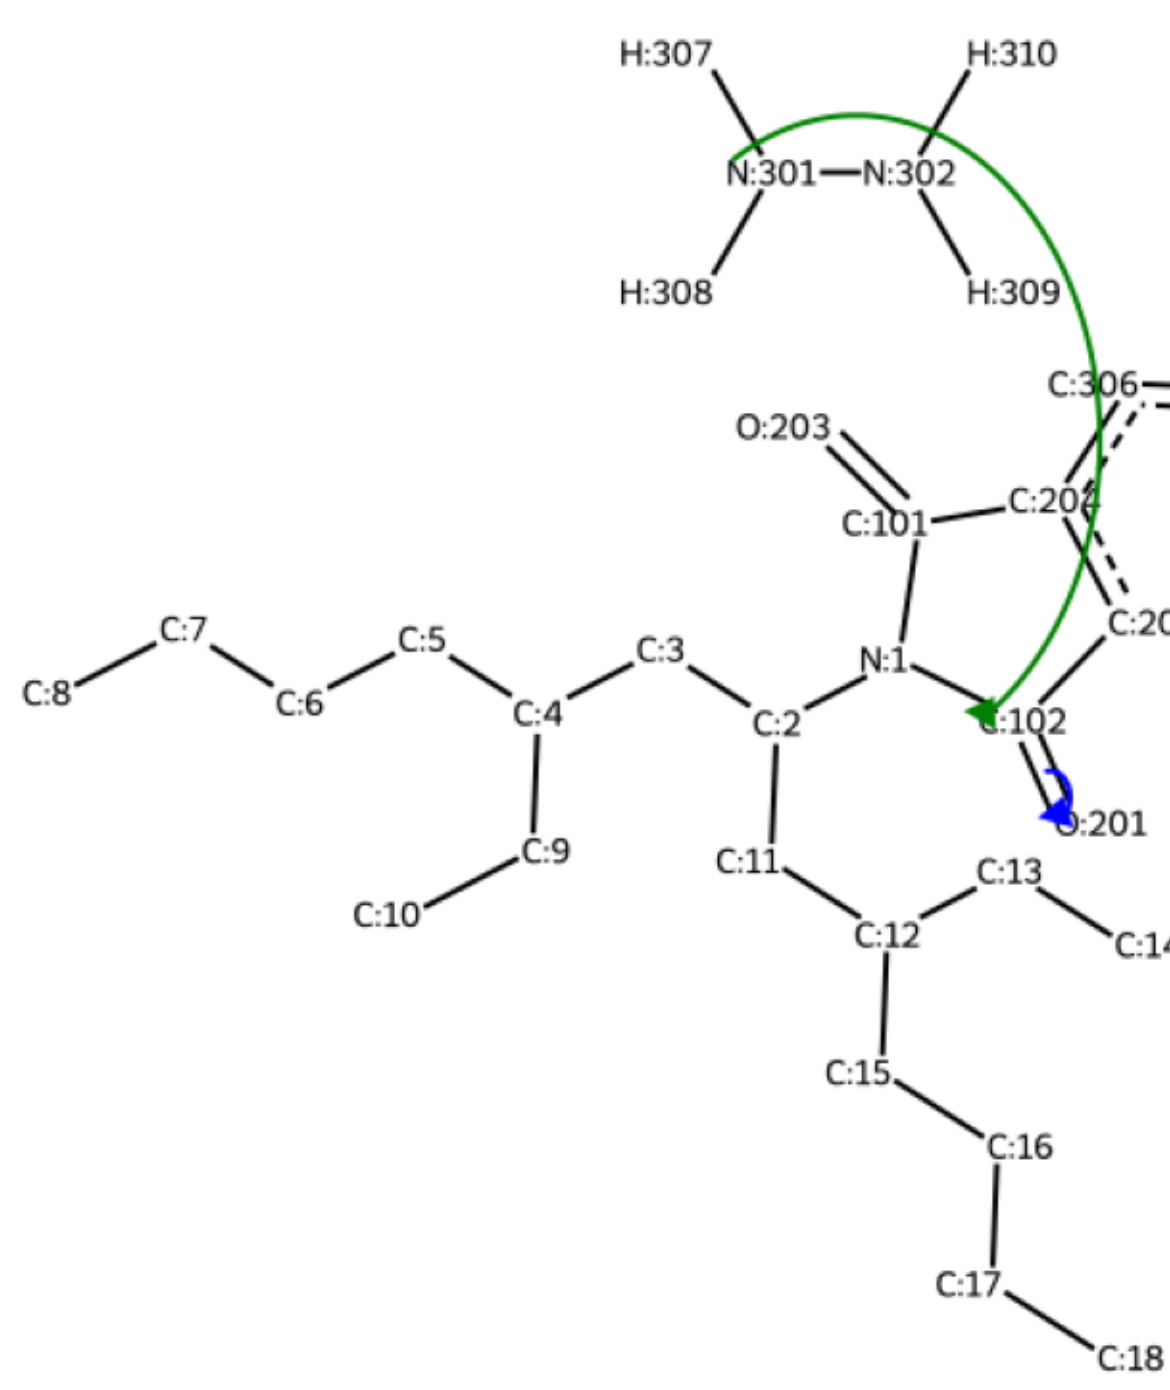

step #2

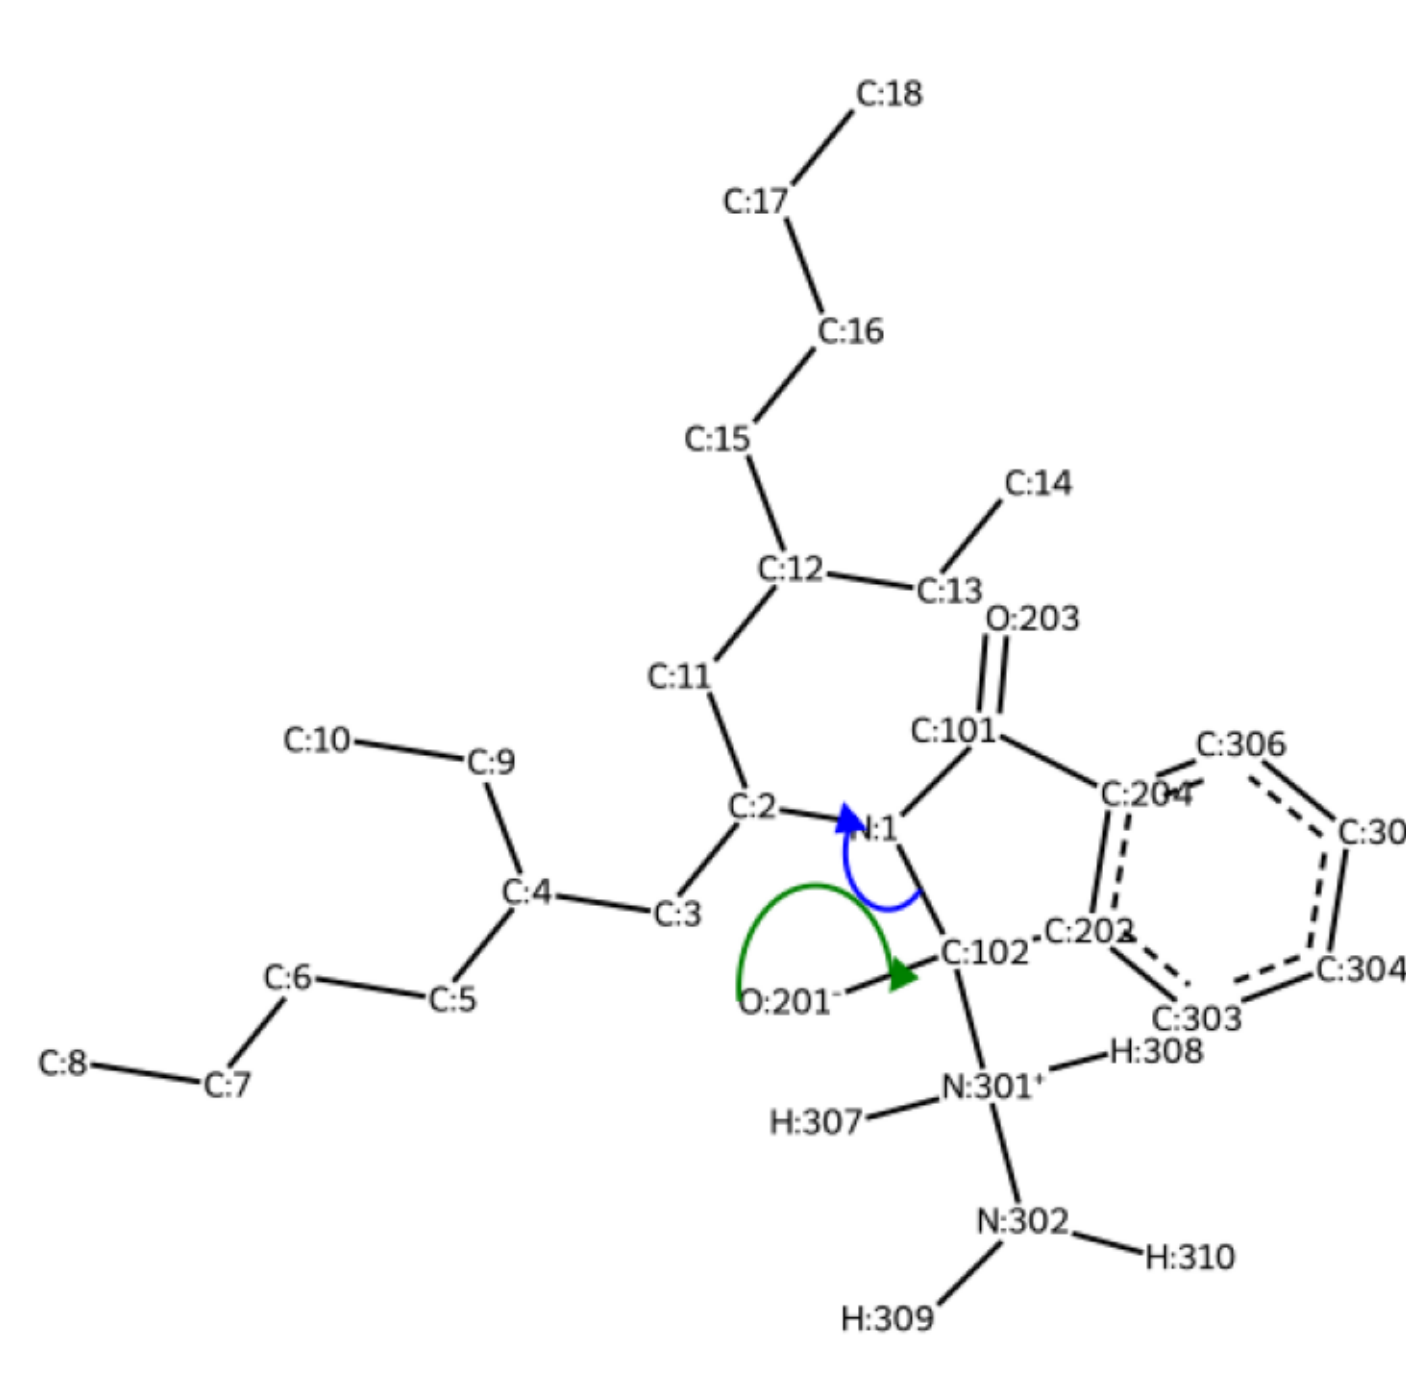

step #3

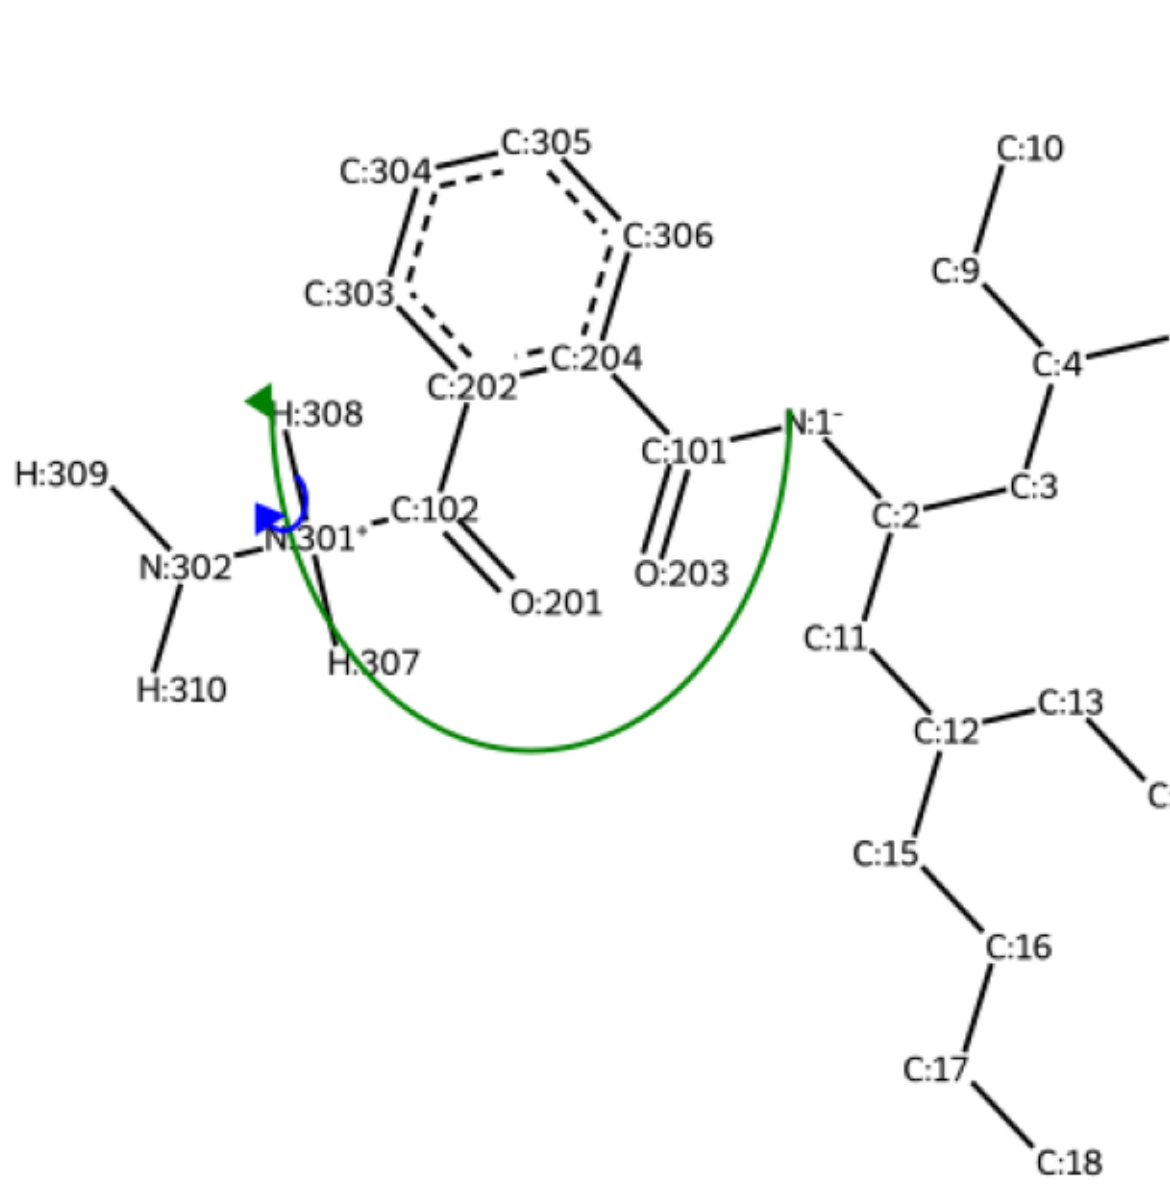

step #4

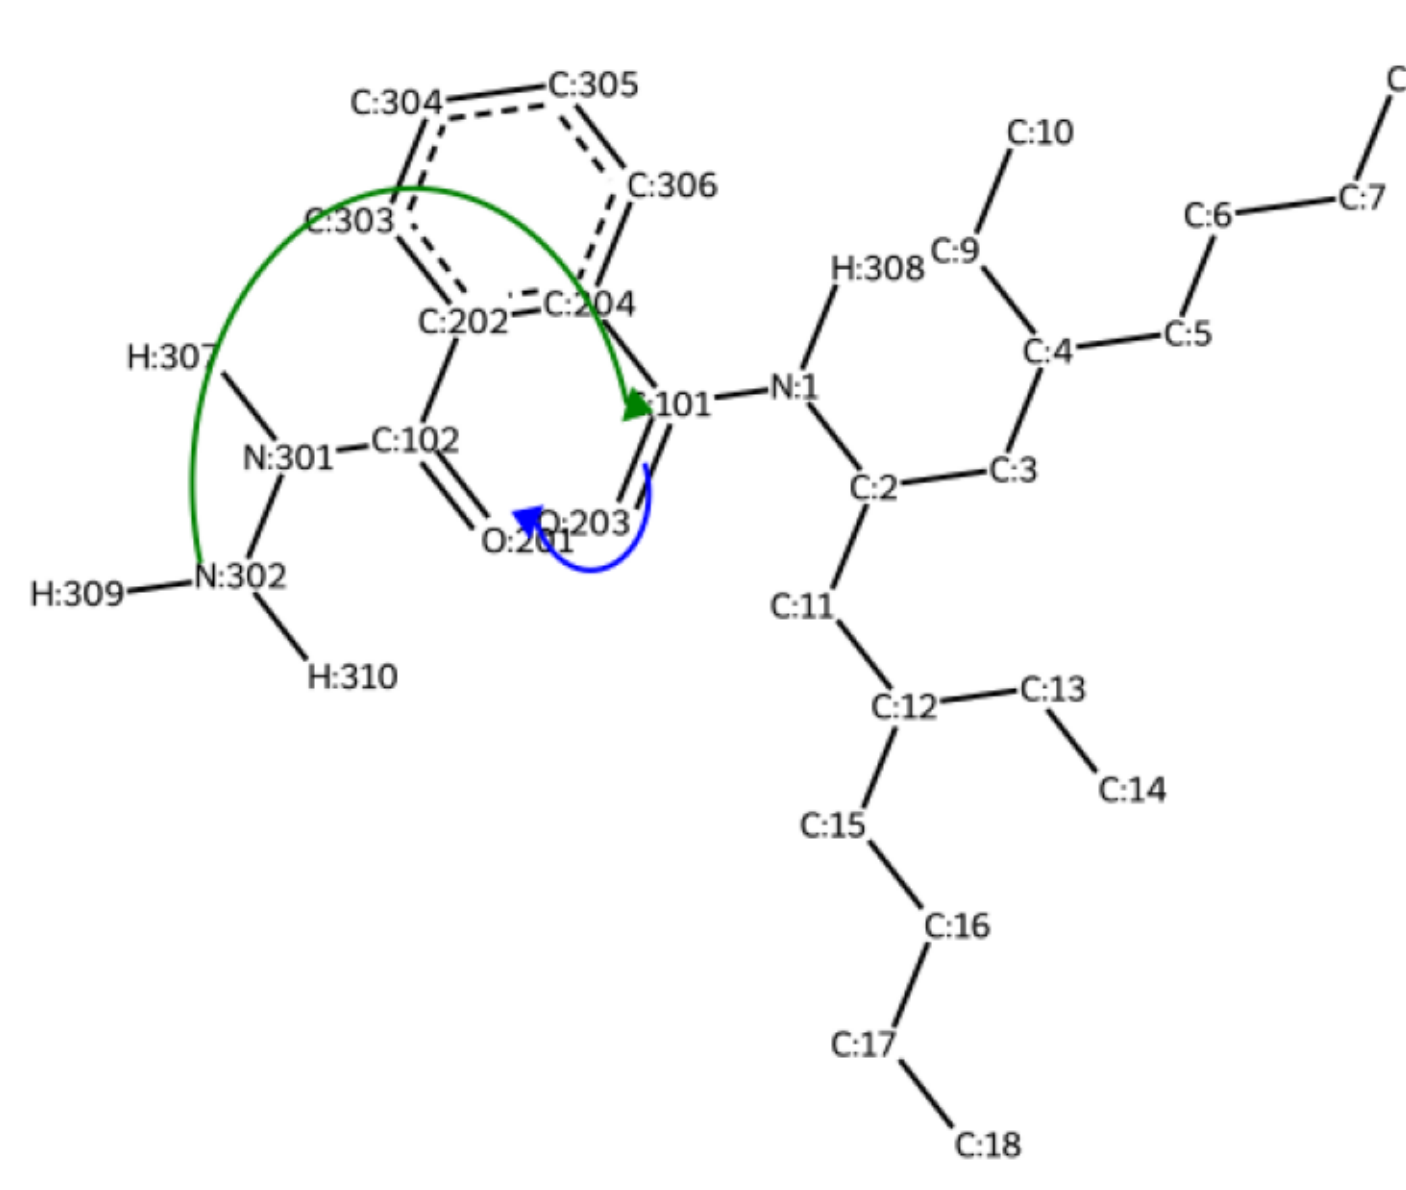

step #5

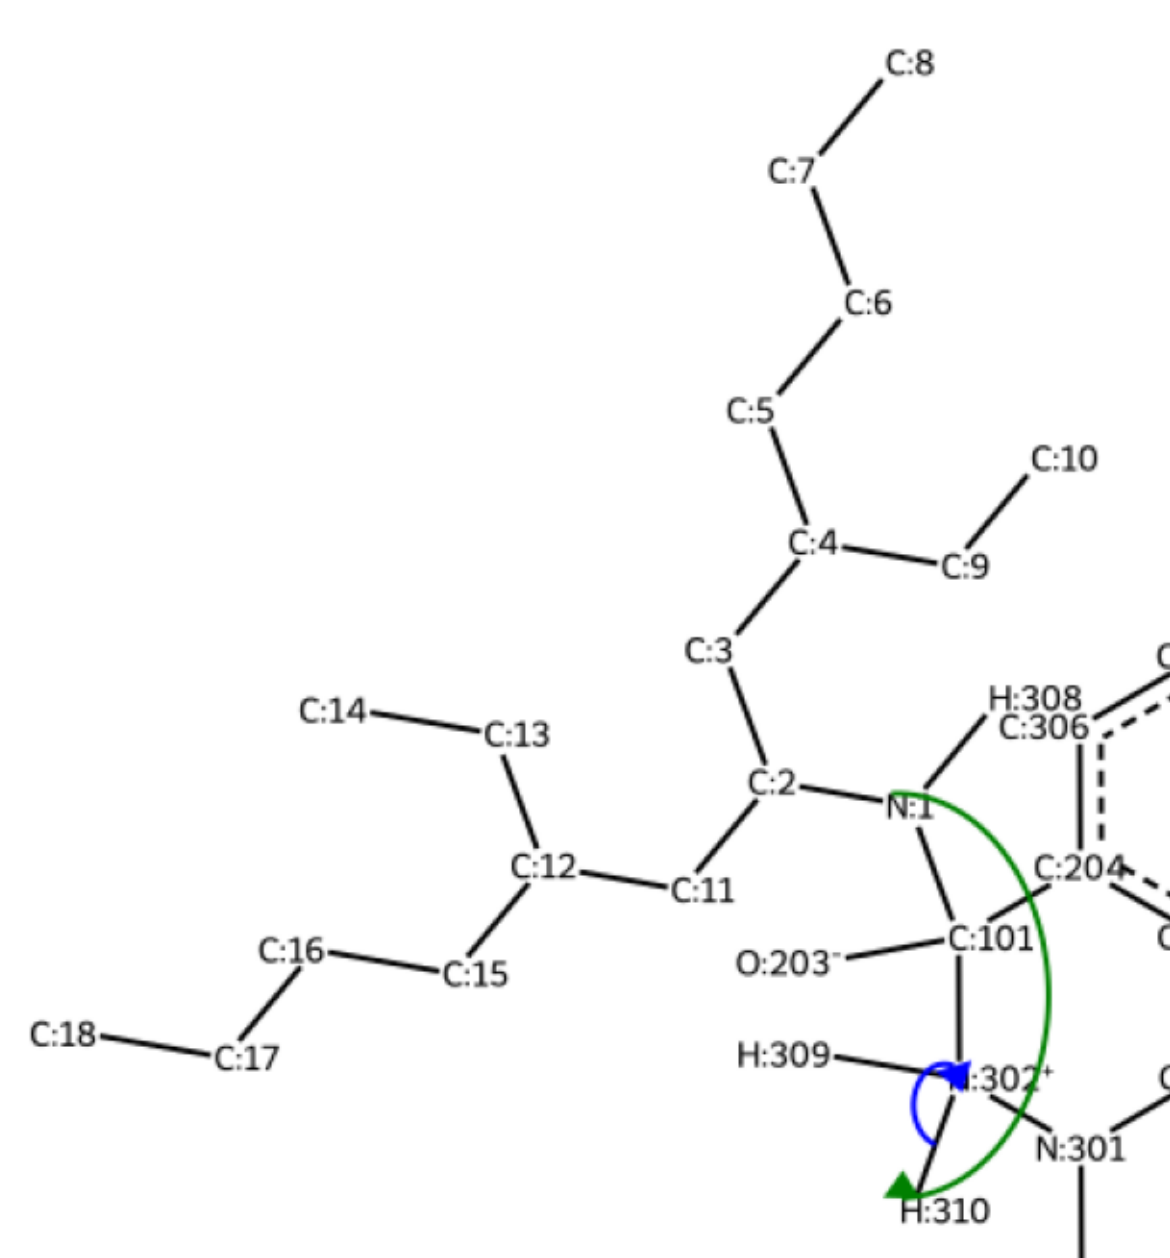

step #6

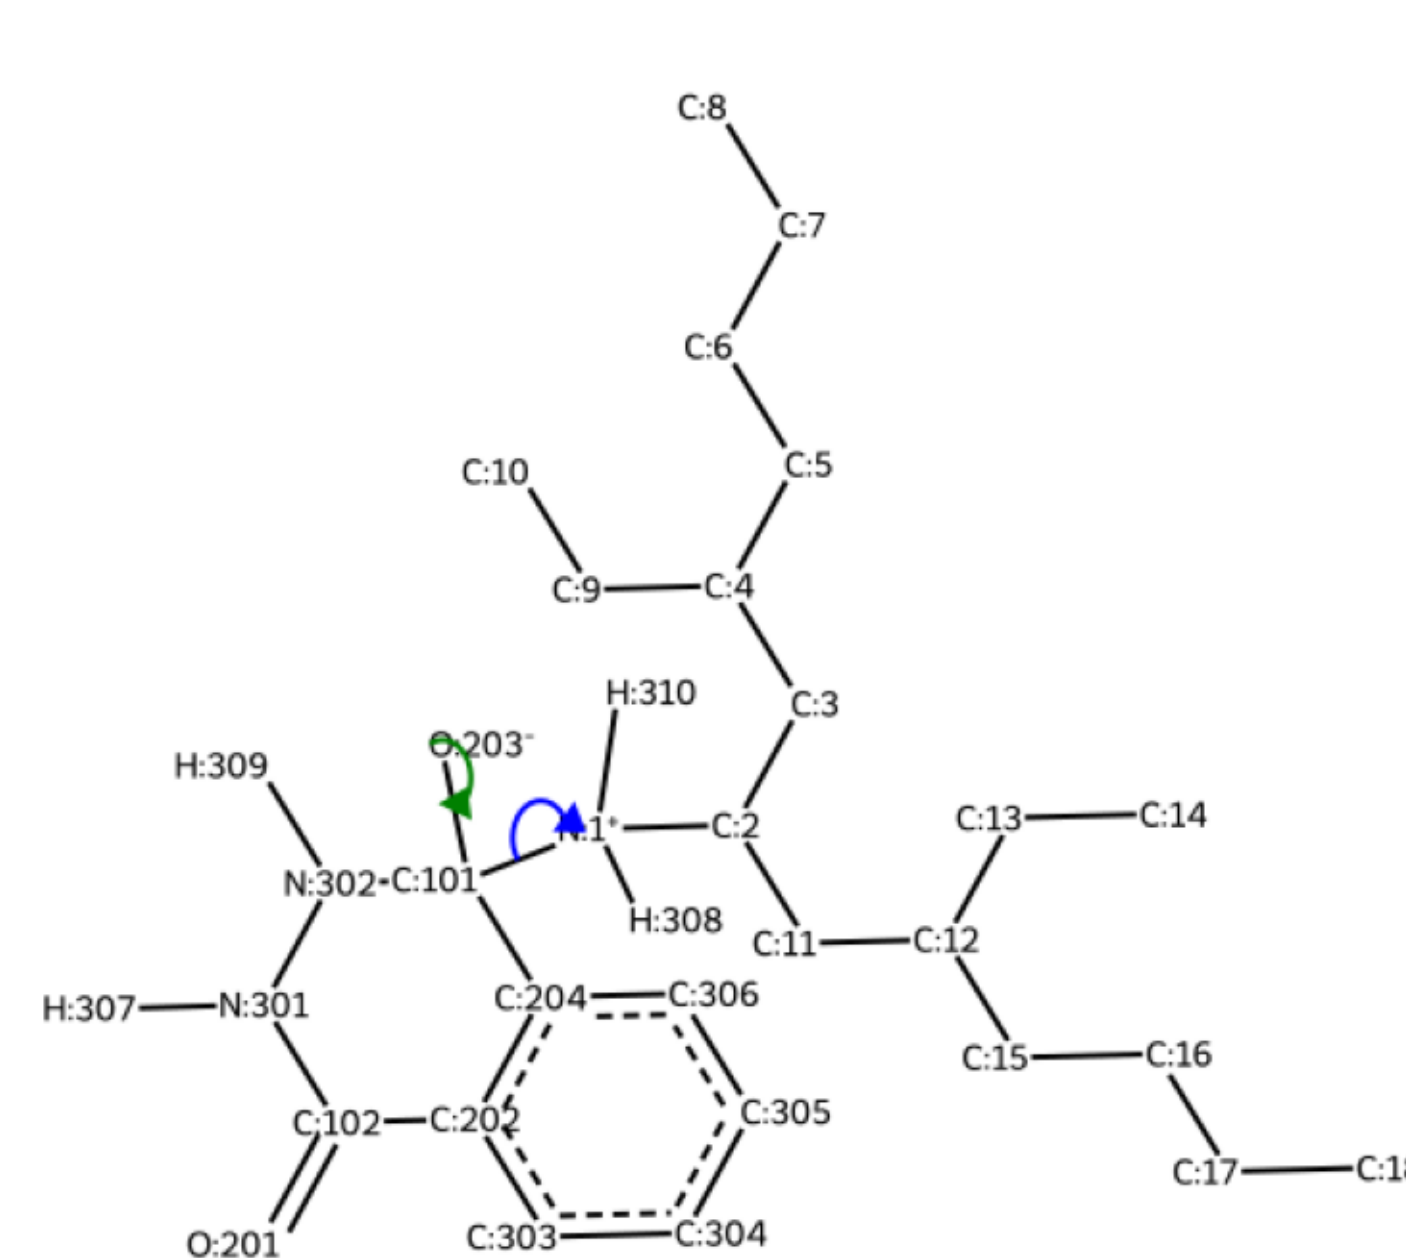

Product(s)

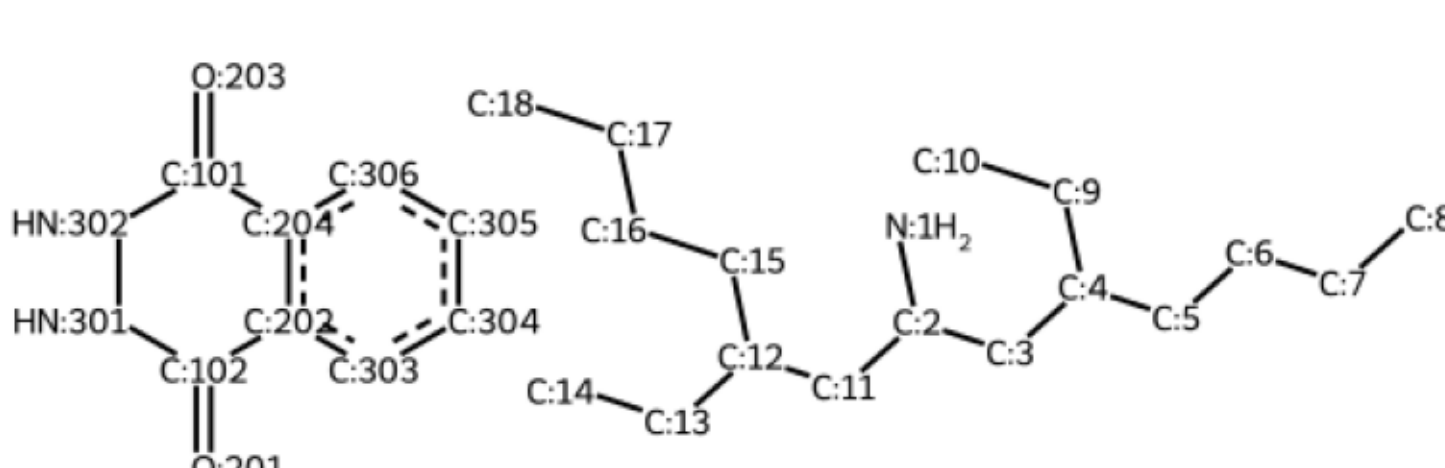



Original reaction  
sampled RXN\_ID:71)

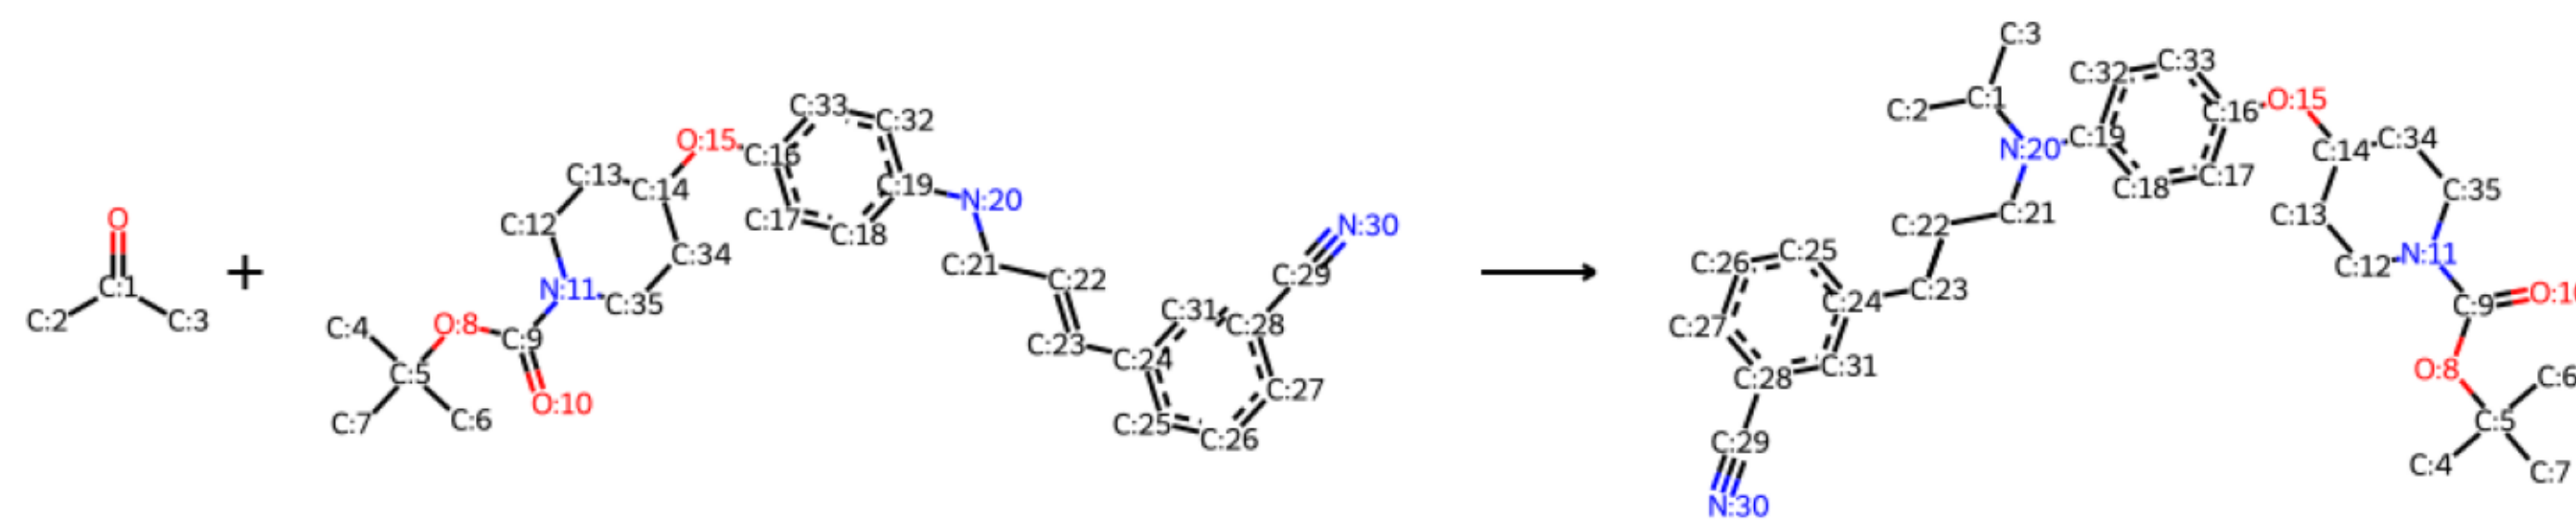

Identified mechanistic class -  
reductive\_amination reaction

Reaction with missing reagents recovered

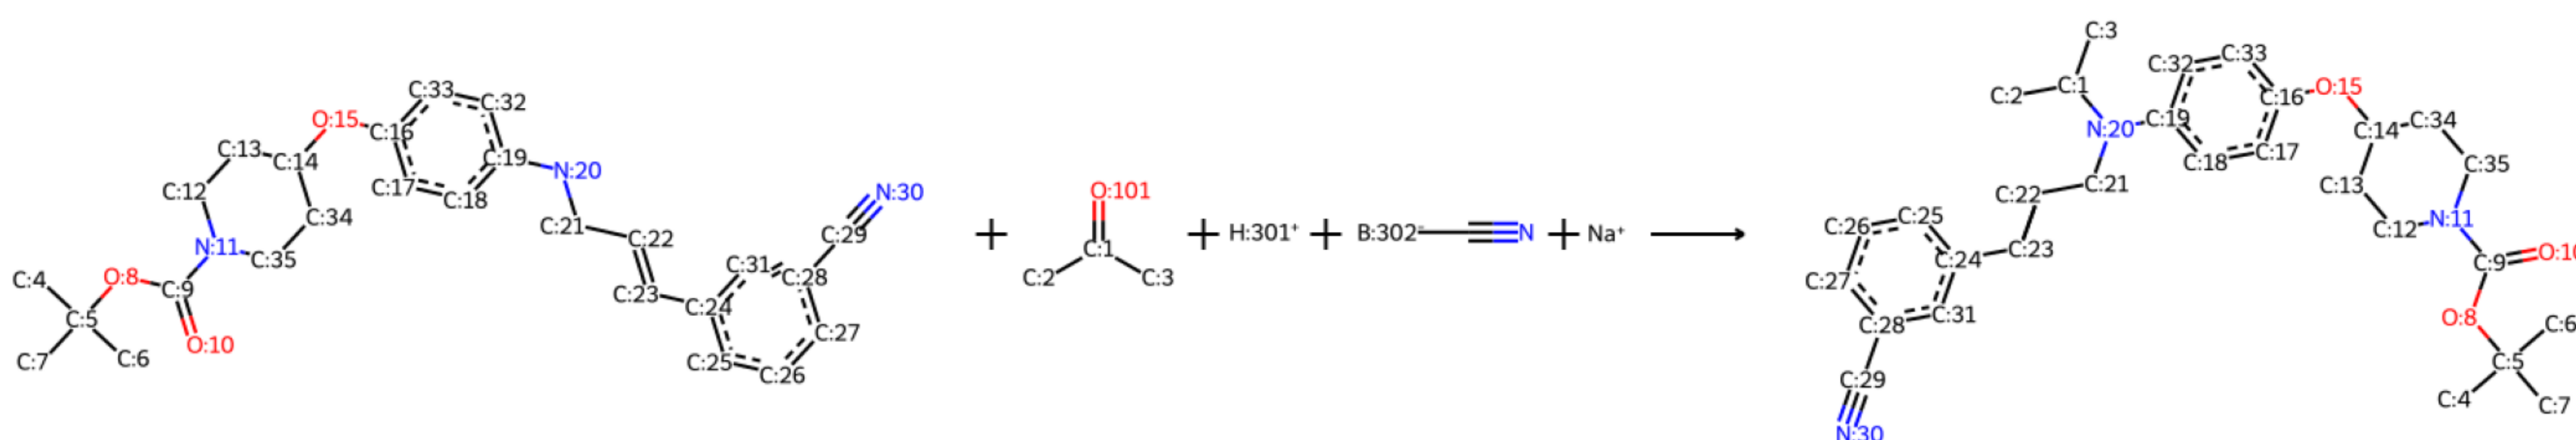

Proposed mechanistic pathway

[Arrow order: (1) green, (2) blue, (3) red, (4) orange]

step #1

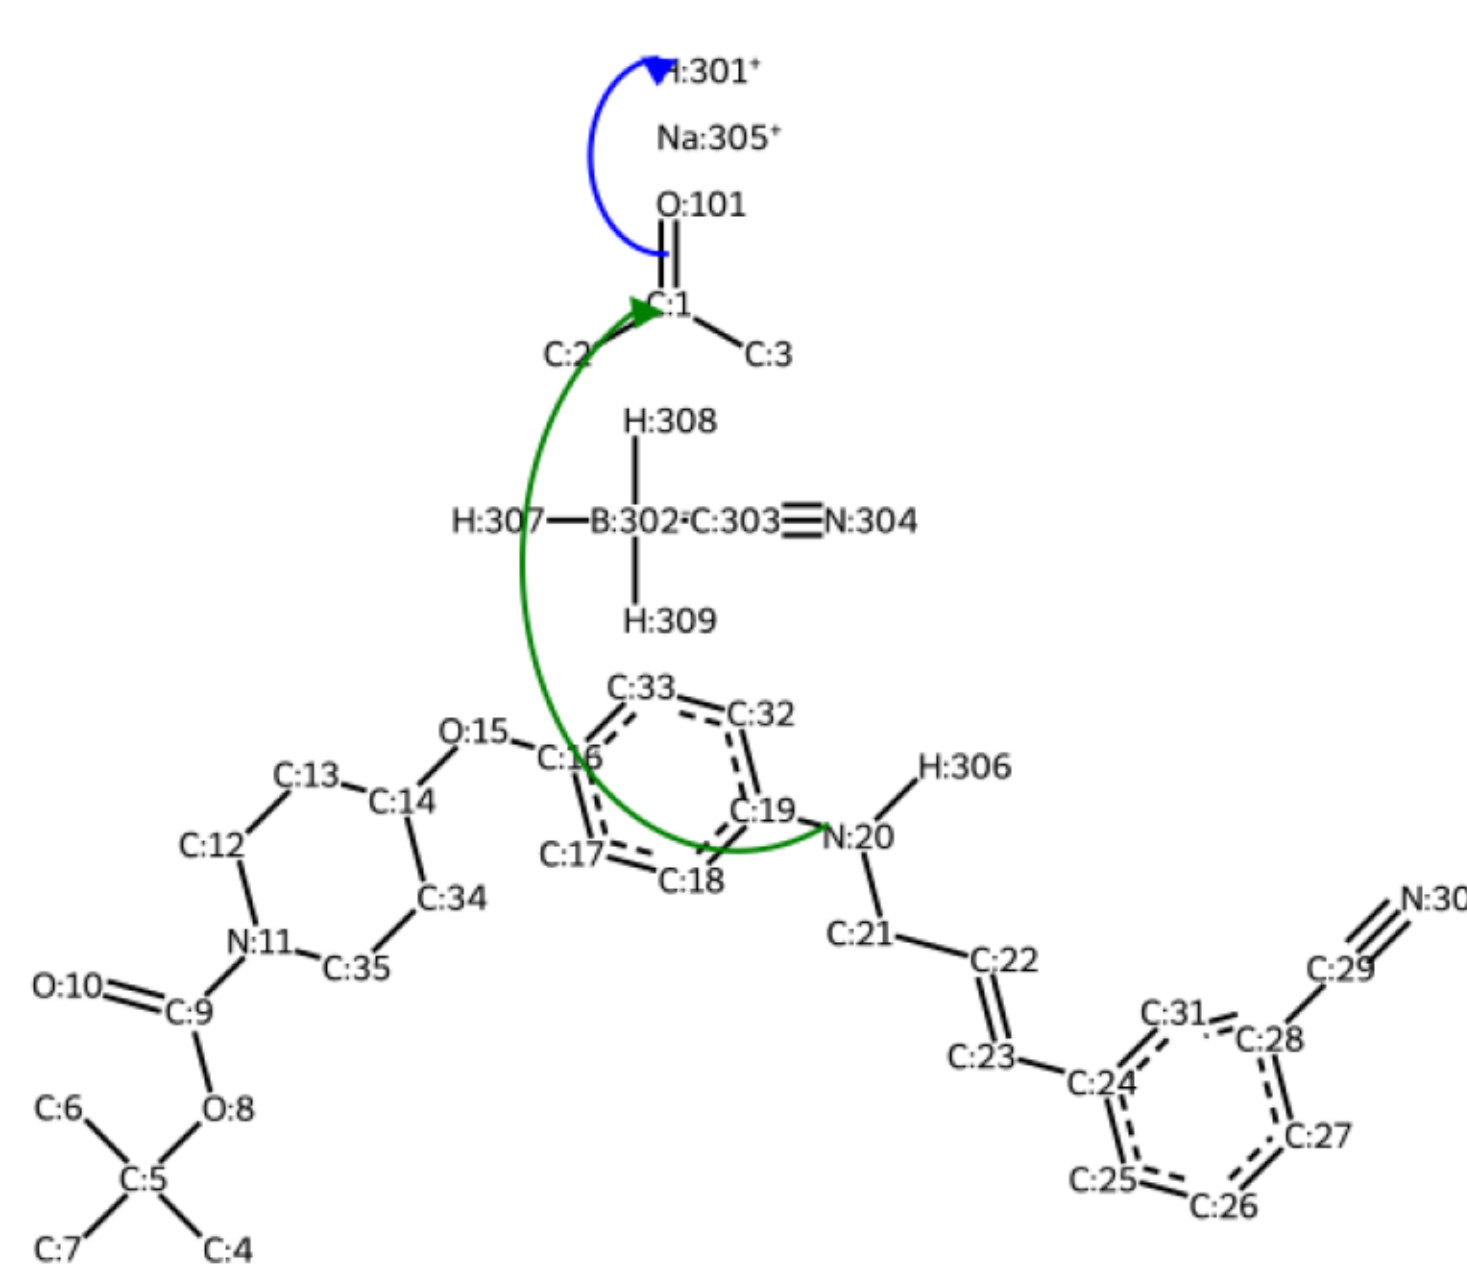

step #2

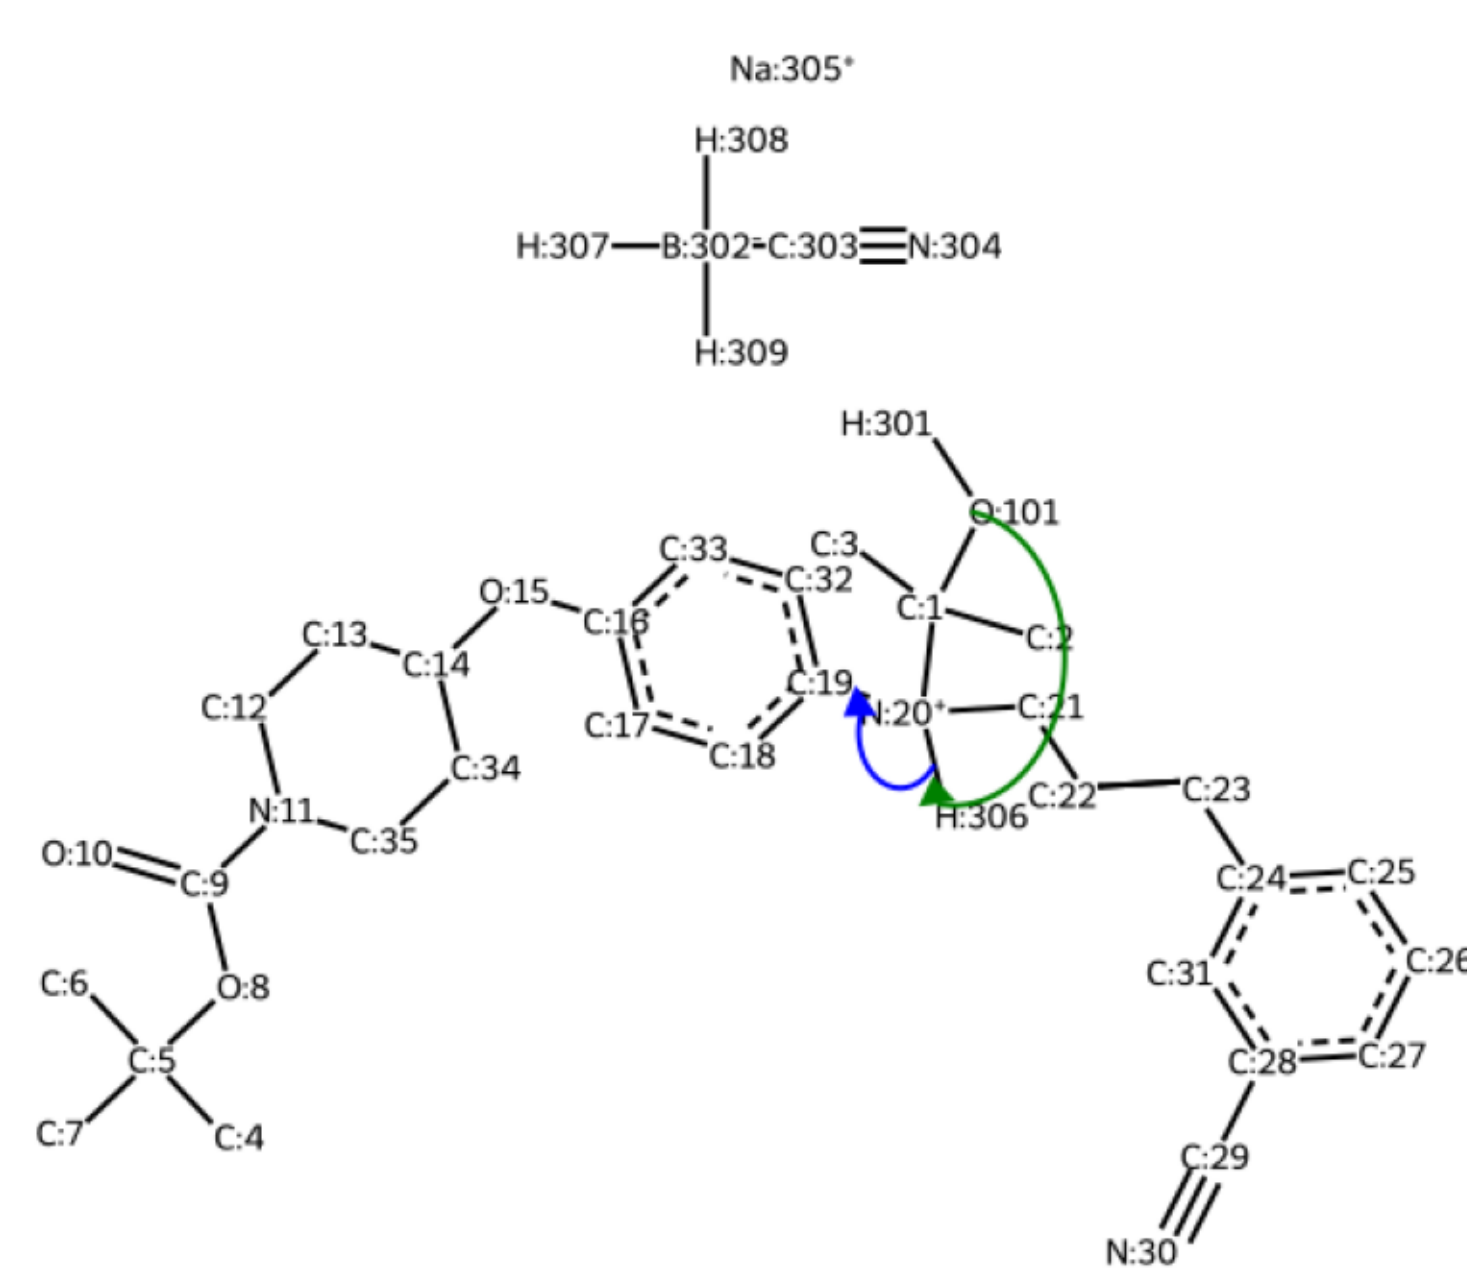

step #3

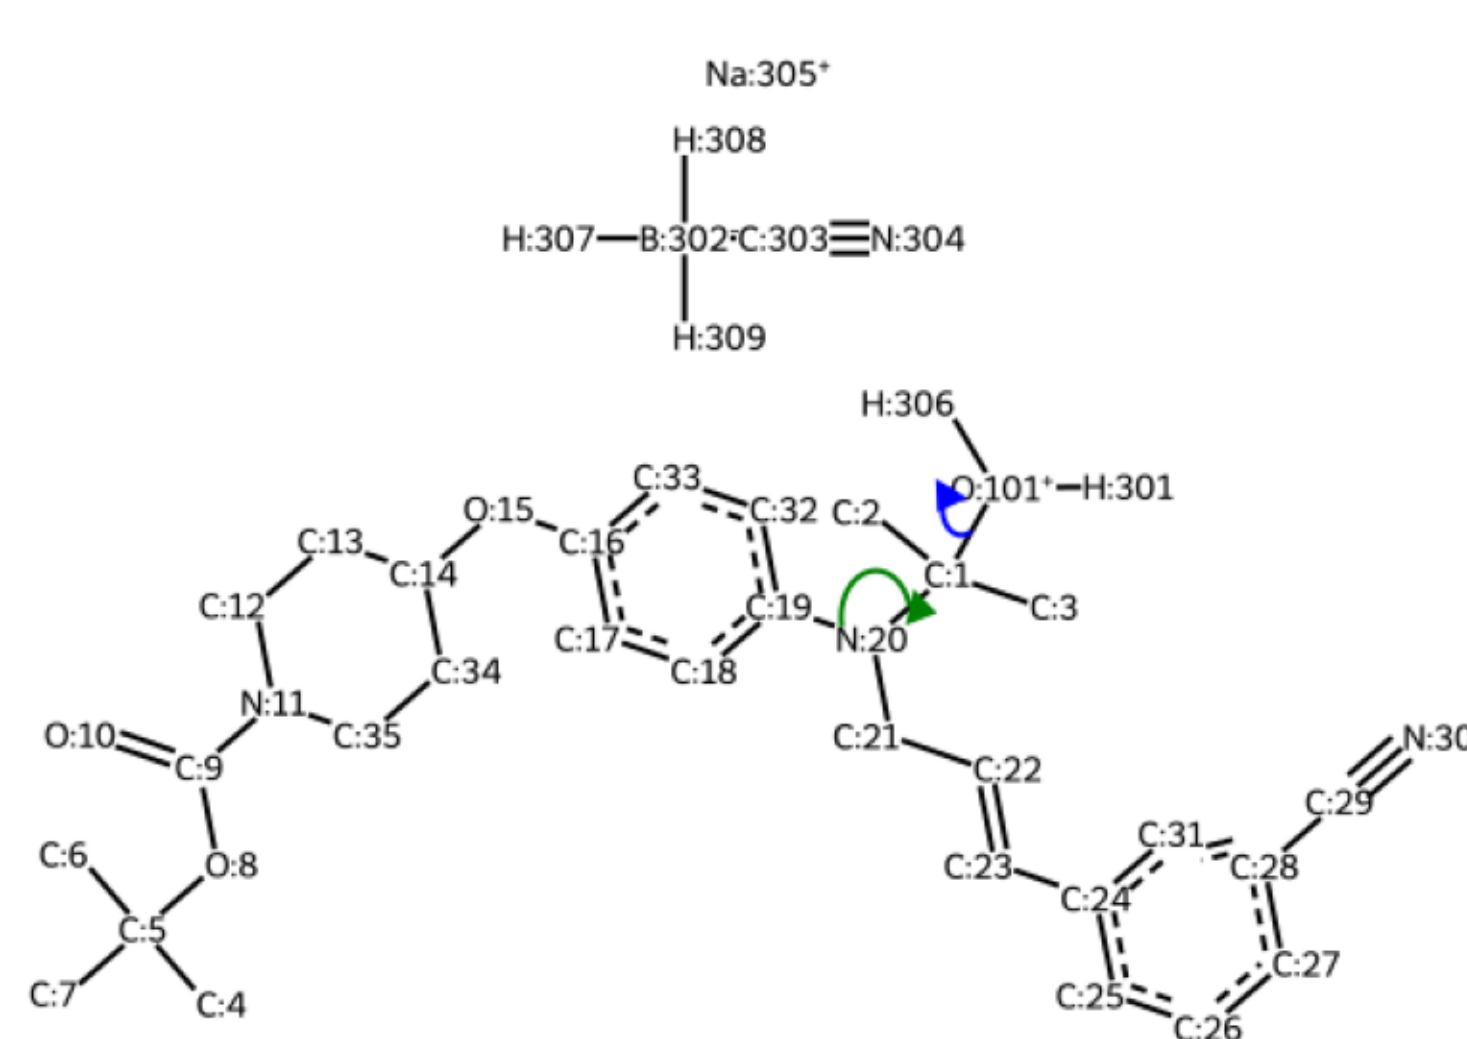

step #4

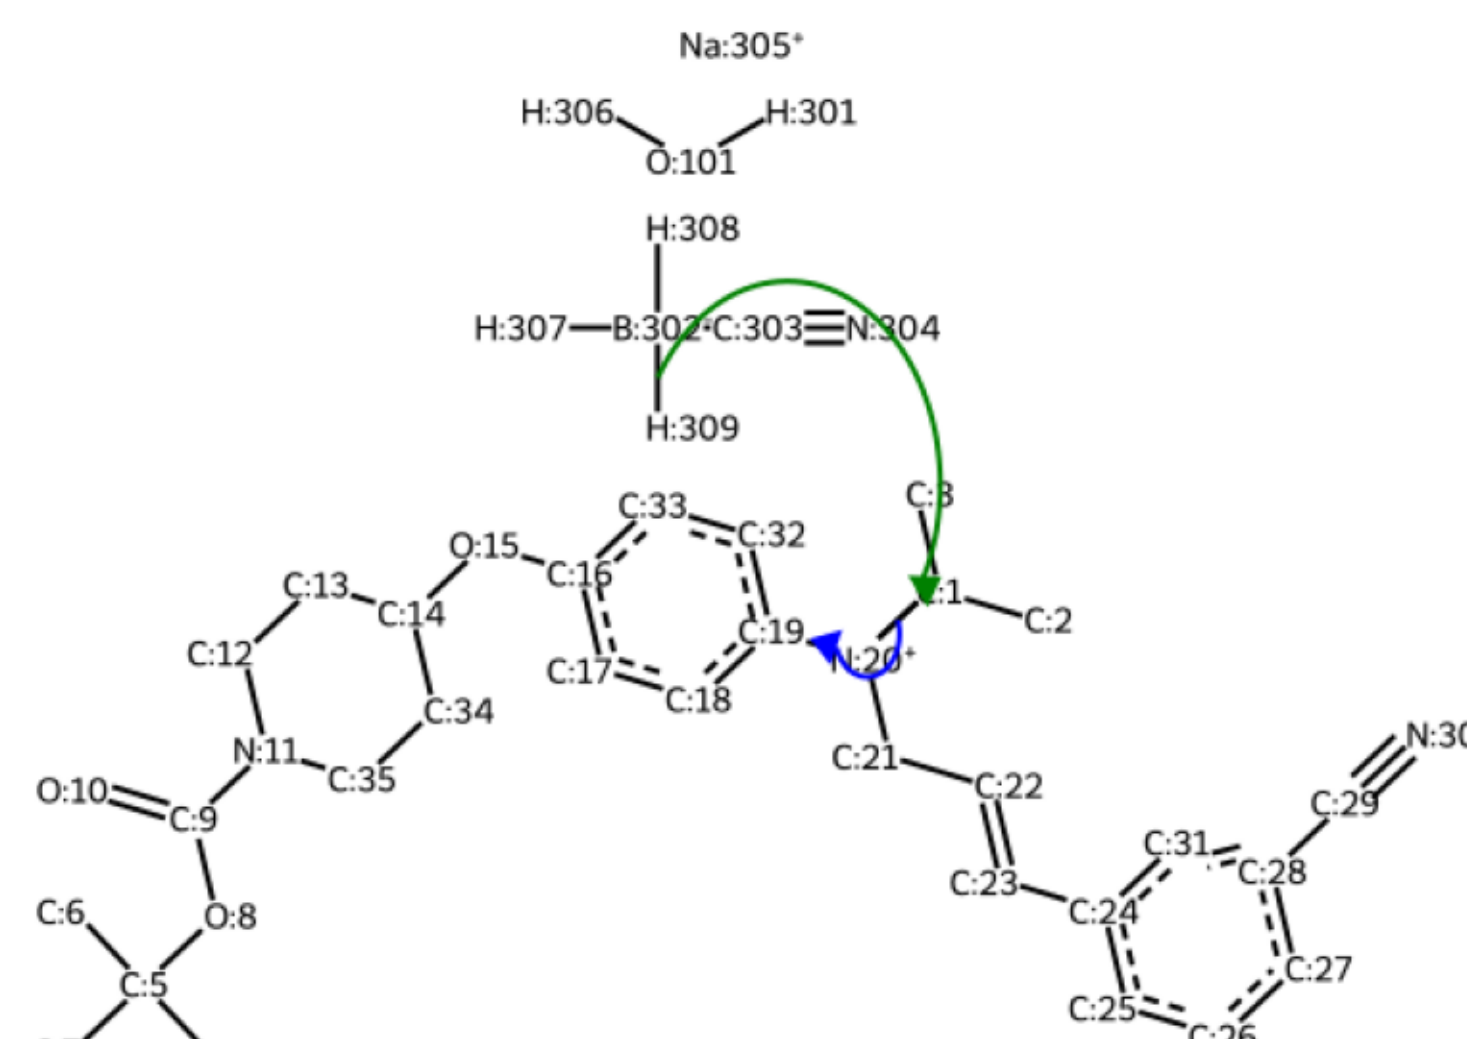

Product(s)

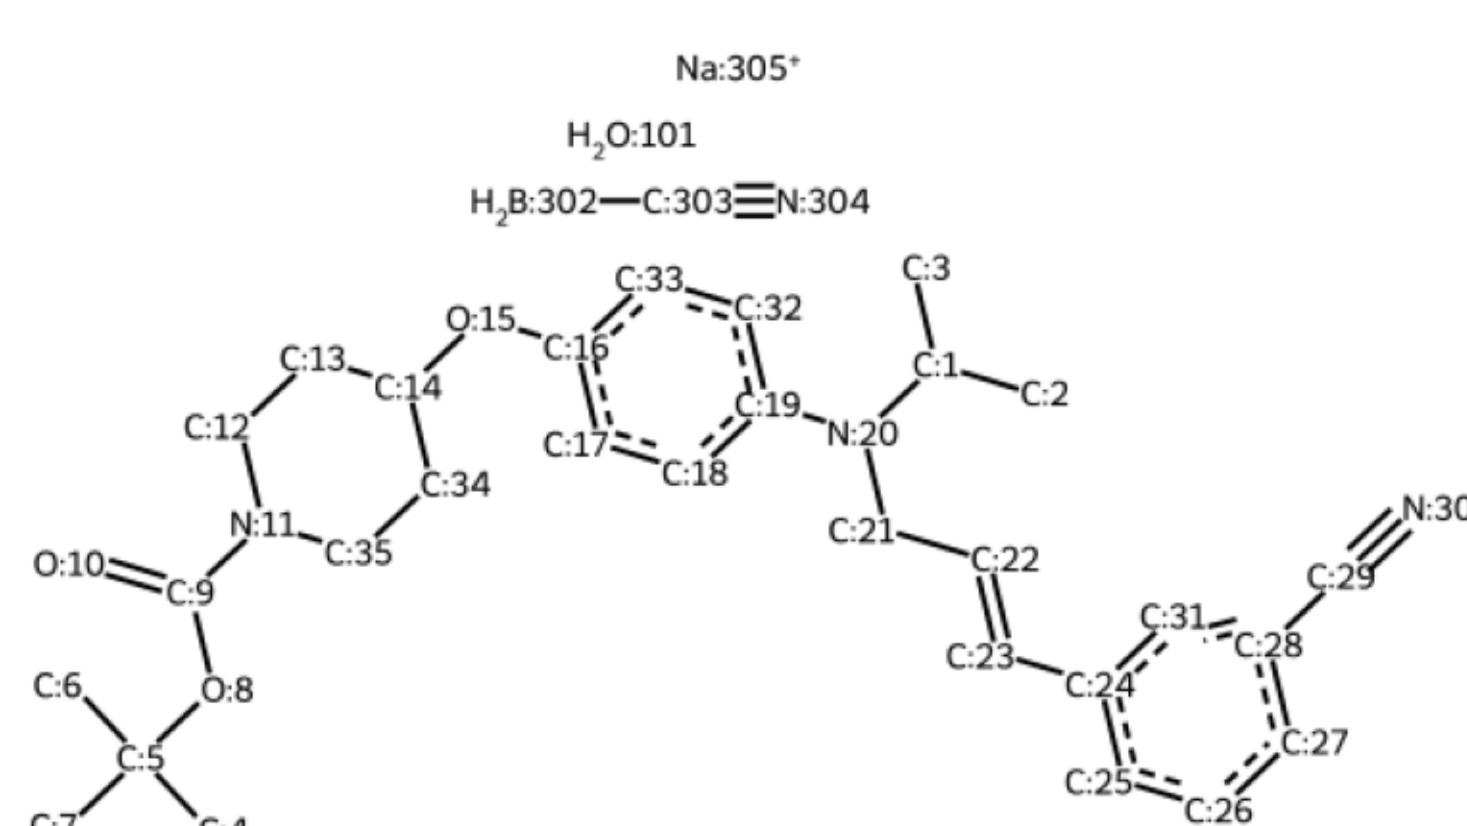



# Original reaction sampled RXN\_ID:72)

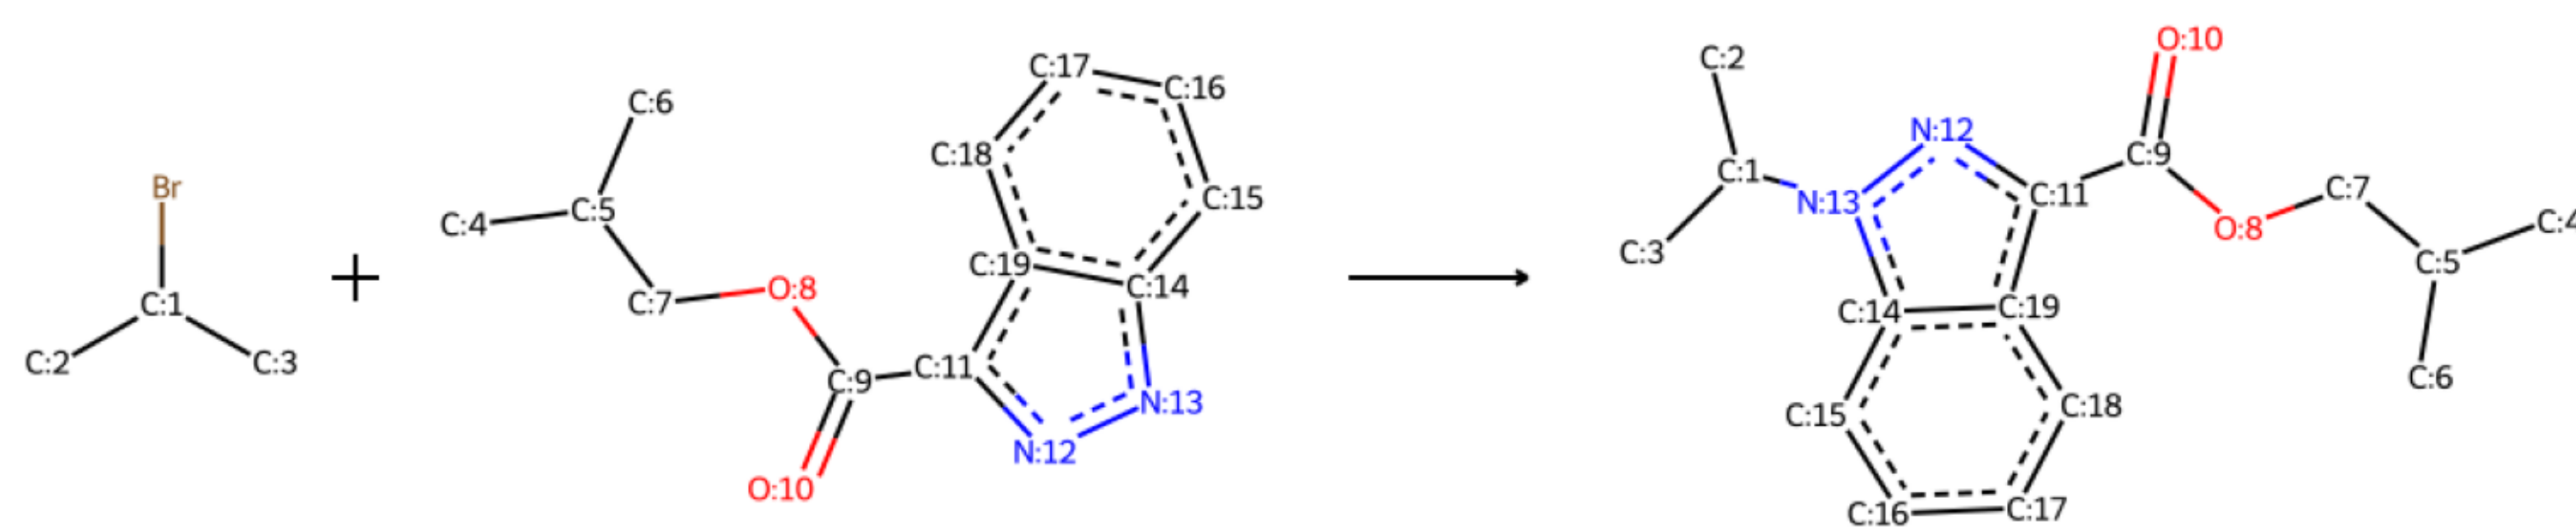

Identified mechanistic class -  
SN2 reaction

## Reaction with missing reagents recovered

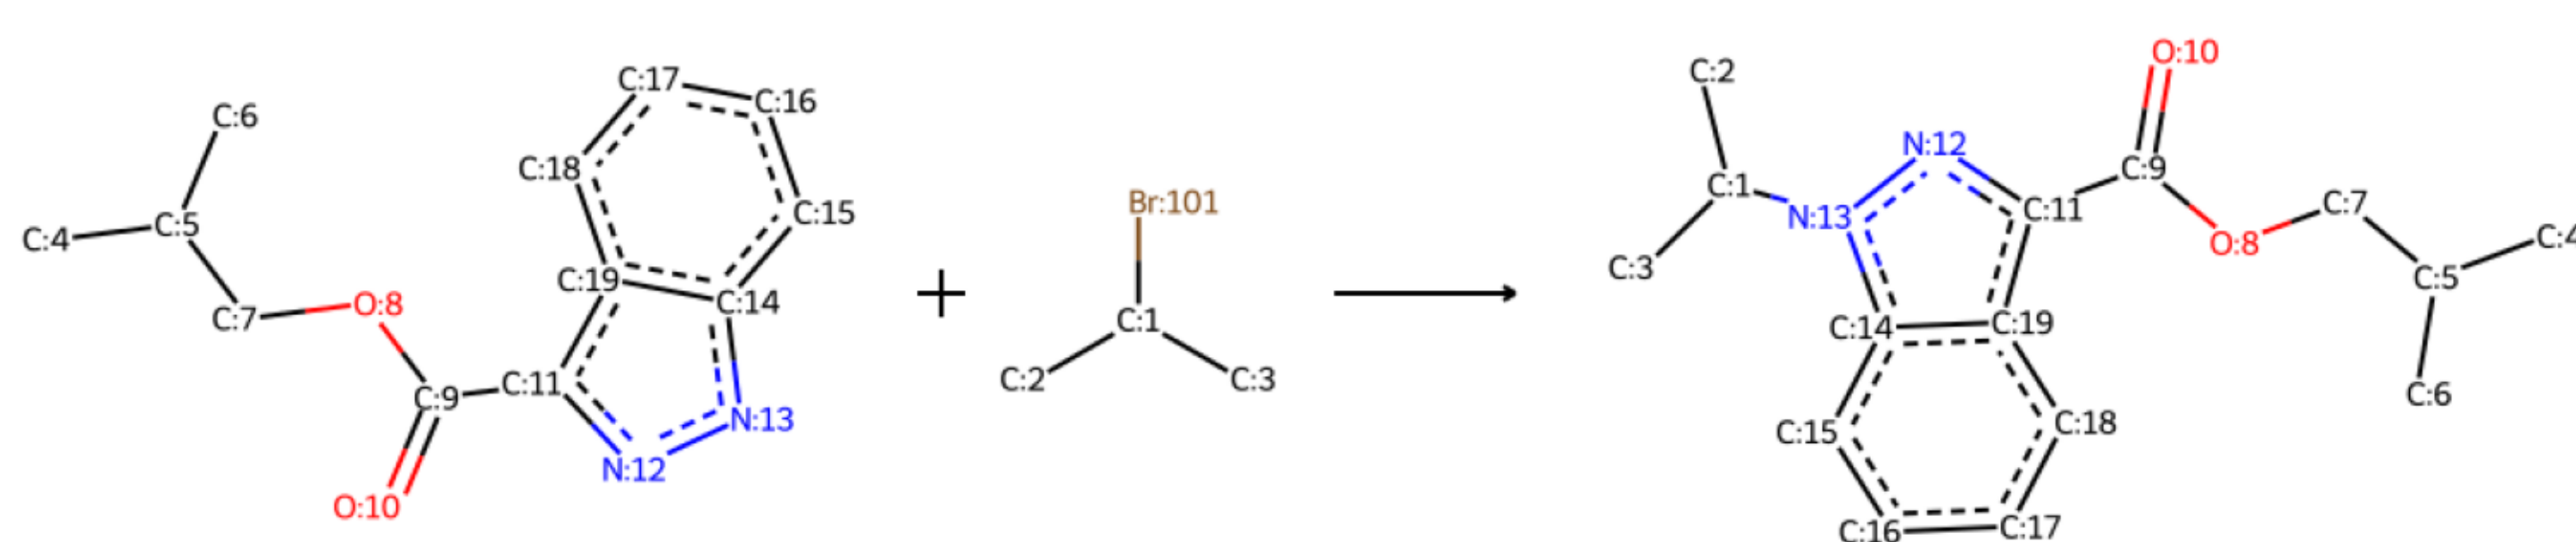

## Proposed mechanistic pathway

[Arrow order: (1) green, (2) blue, (3) red, (4) orange]

step #1

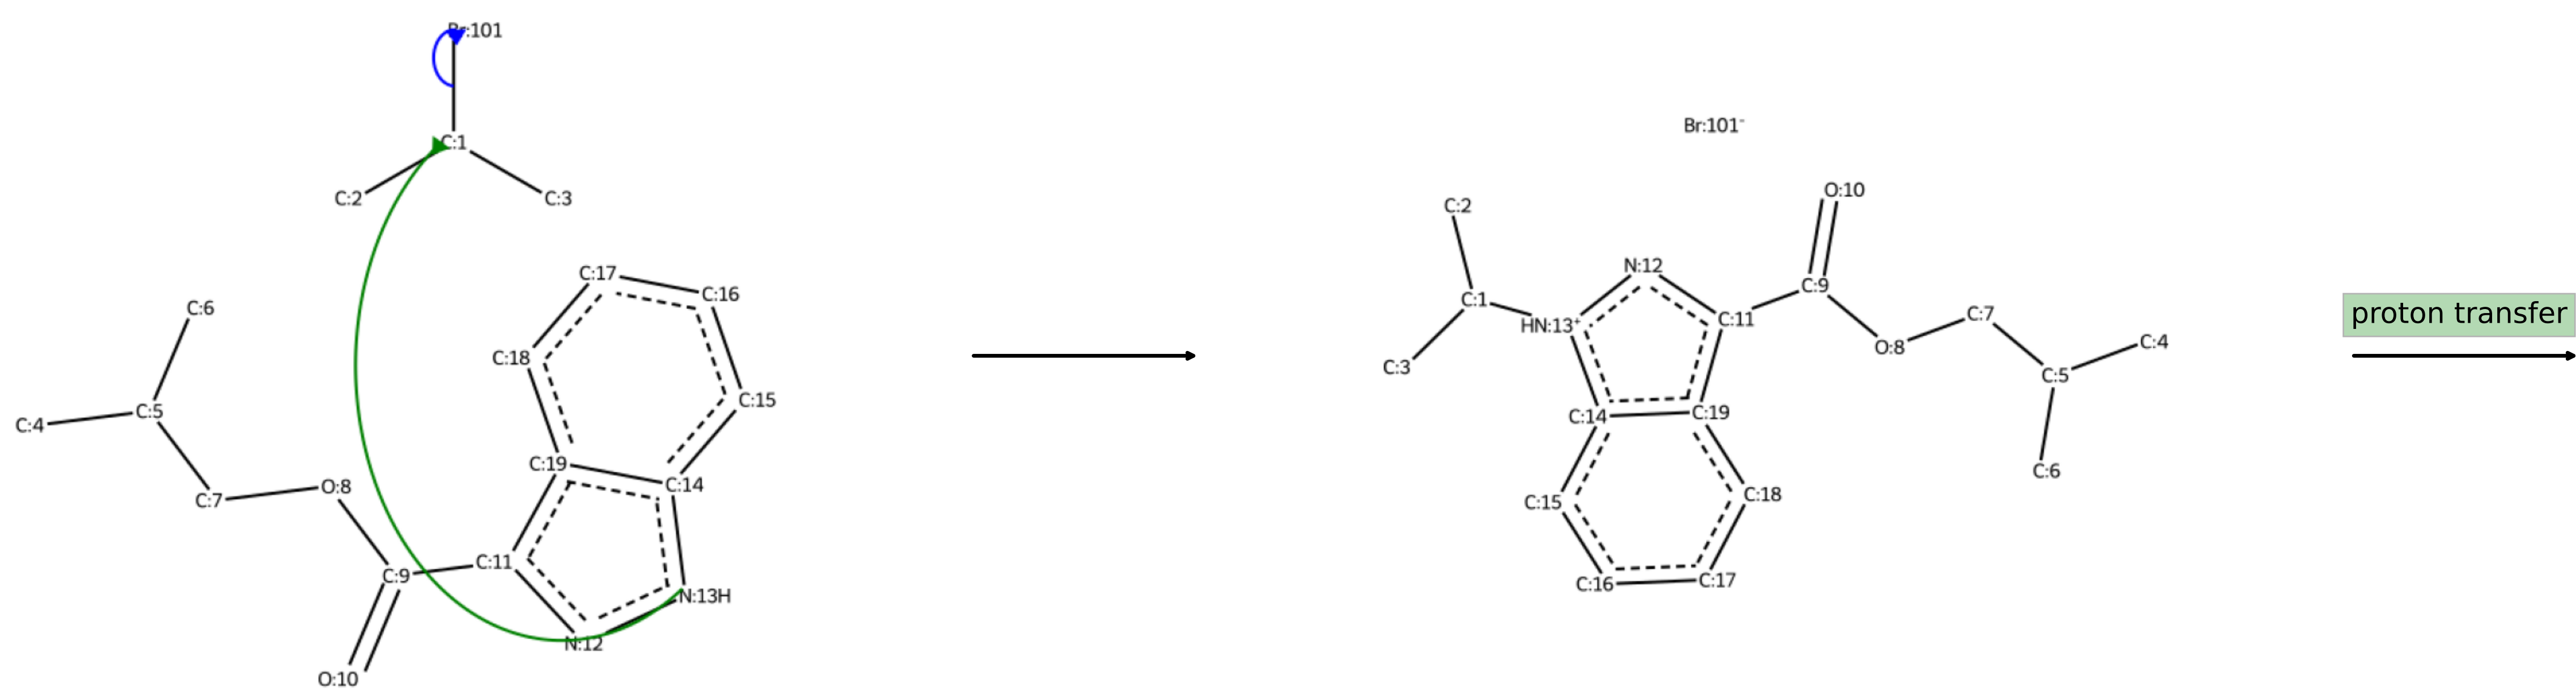

Product(s)

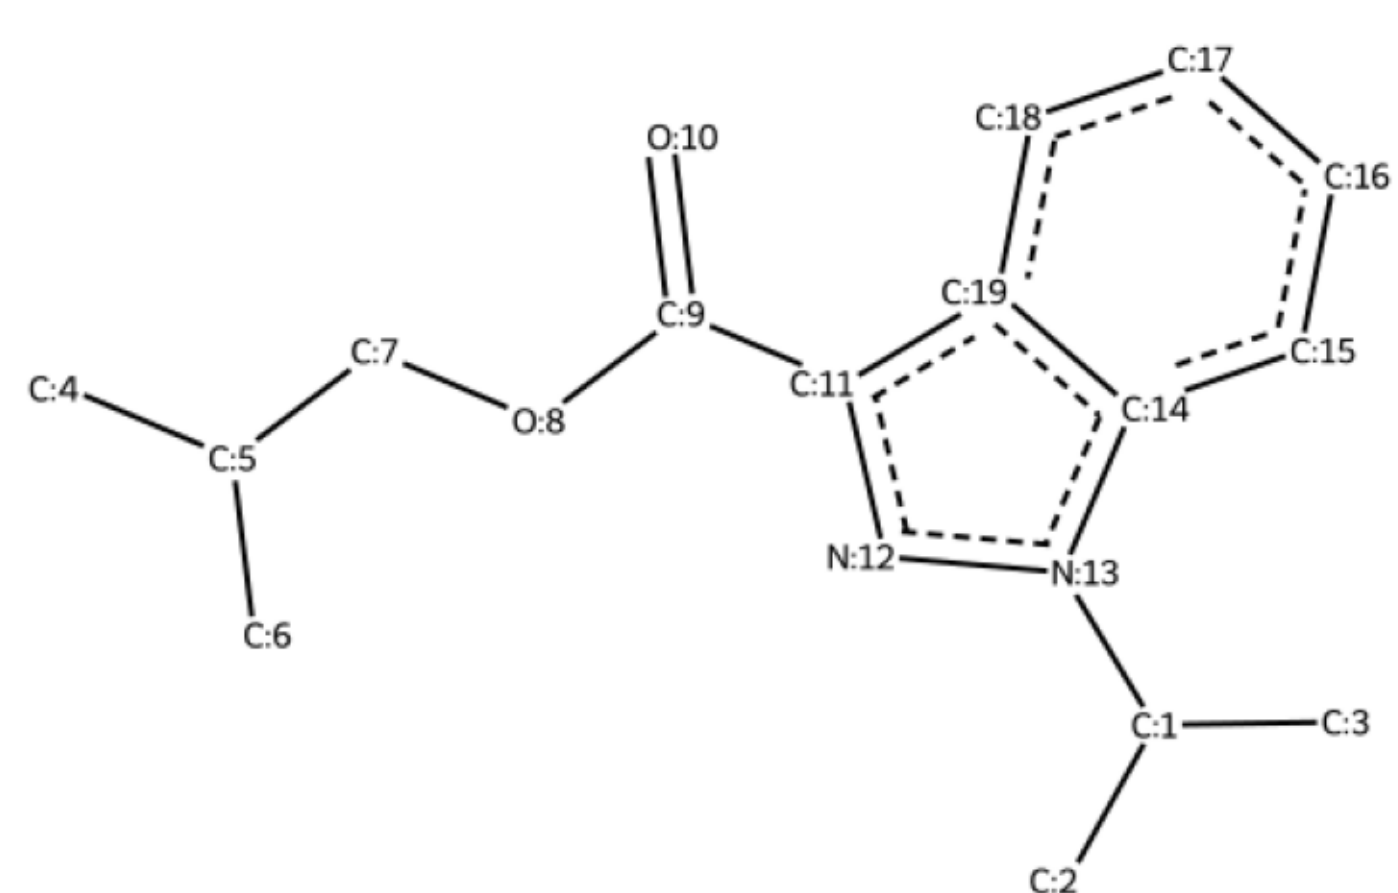

Original reaction  
sampled RXN\_ID:73)

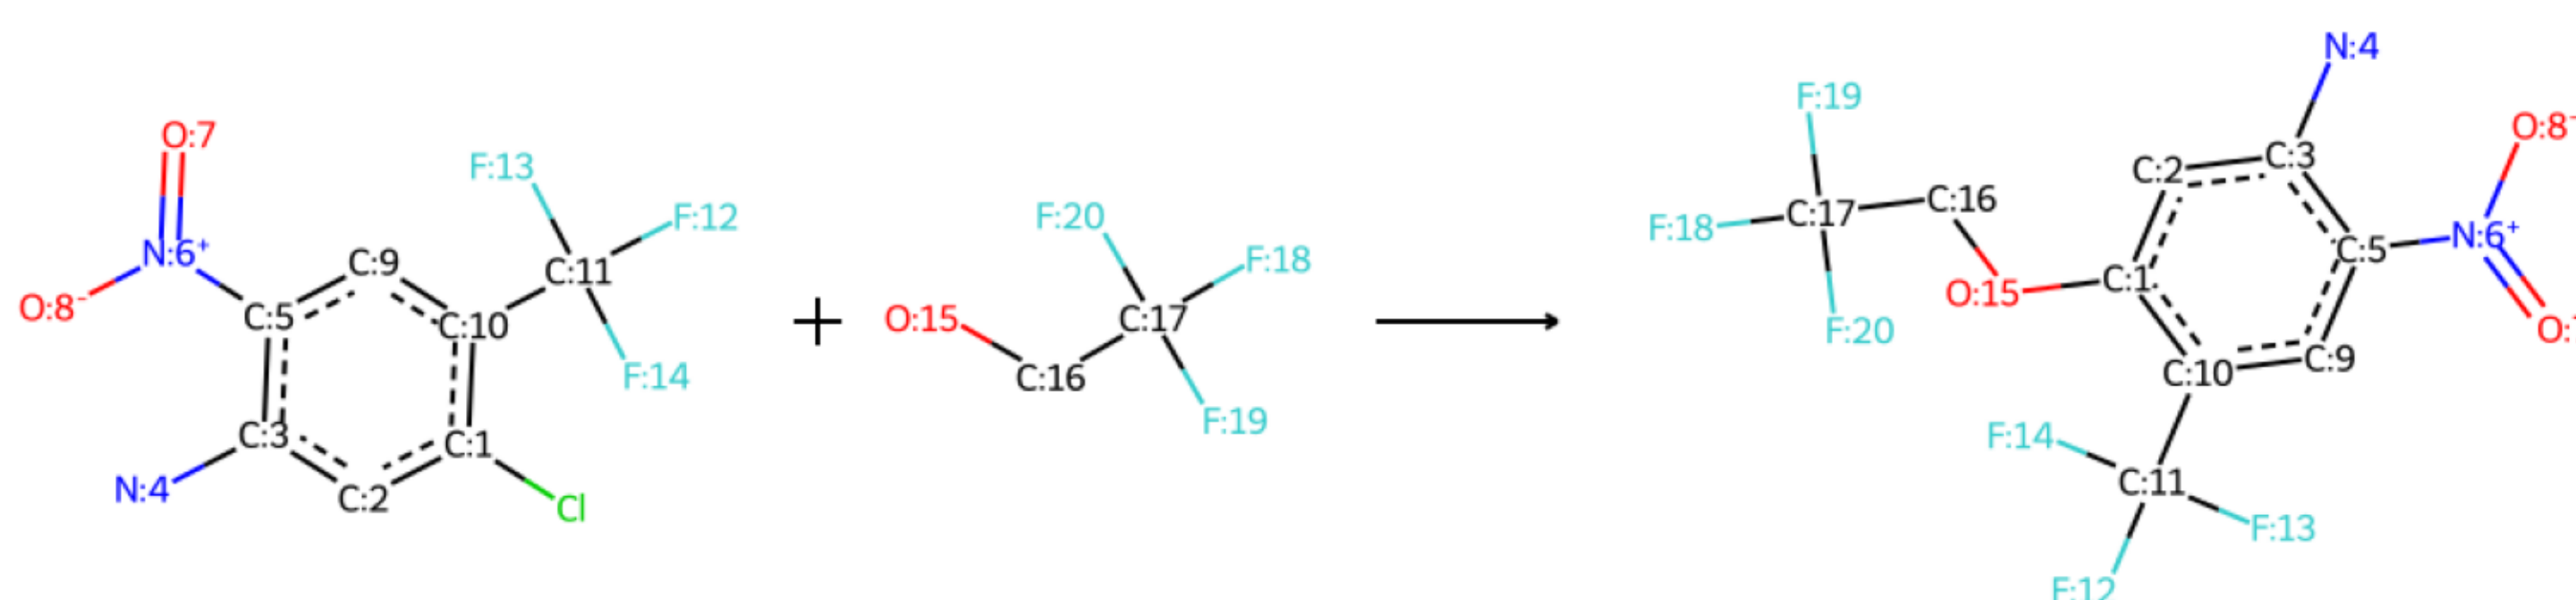

Identified mechanistic class -  
S<sub>N</sub>Ar<sub>alco(thi)ol(para)</sub> reaction

Reaction with missing reagents recovered

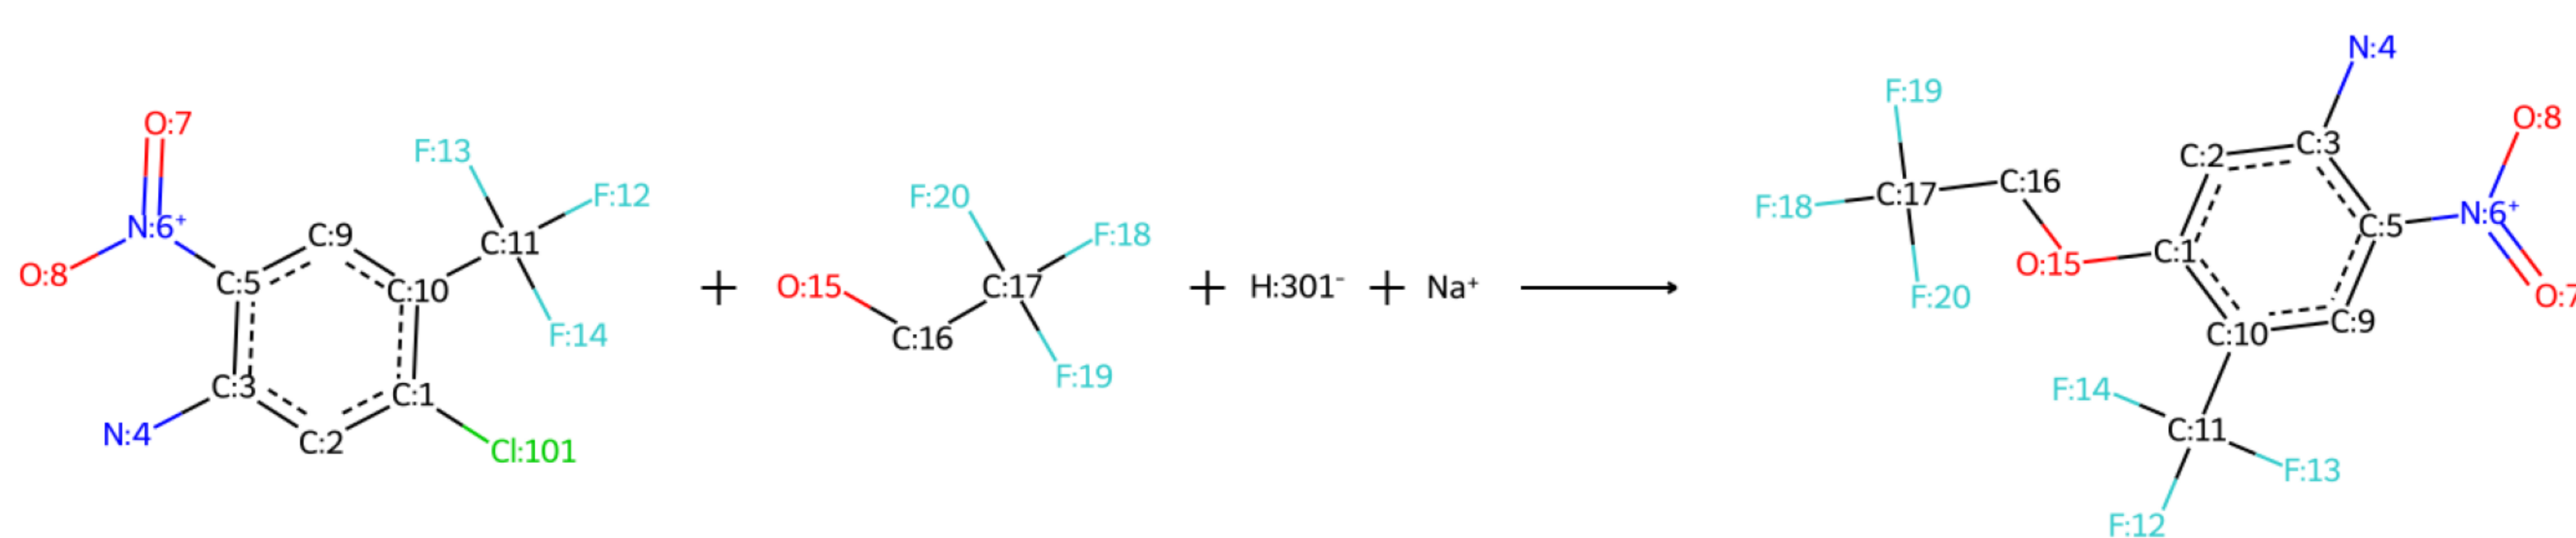

Proposed mechanistic pathway

[Arrow order: (1) green, (2) blue, (3) red, (4) orange]

step #1

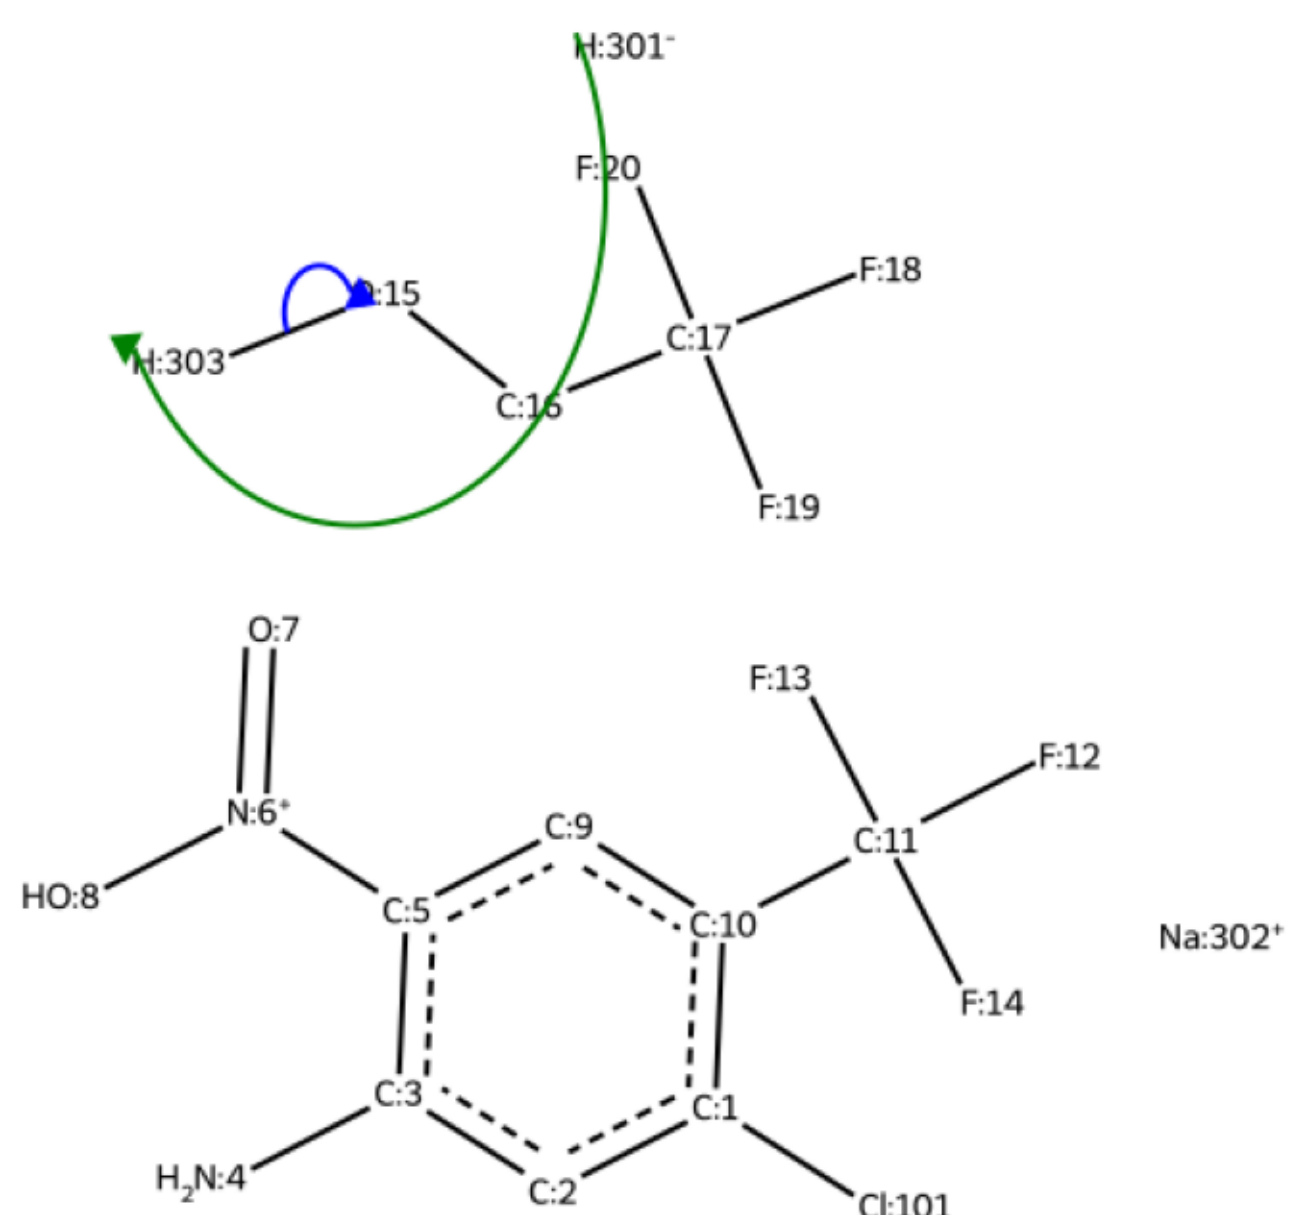

step #2

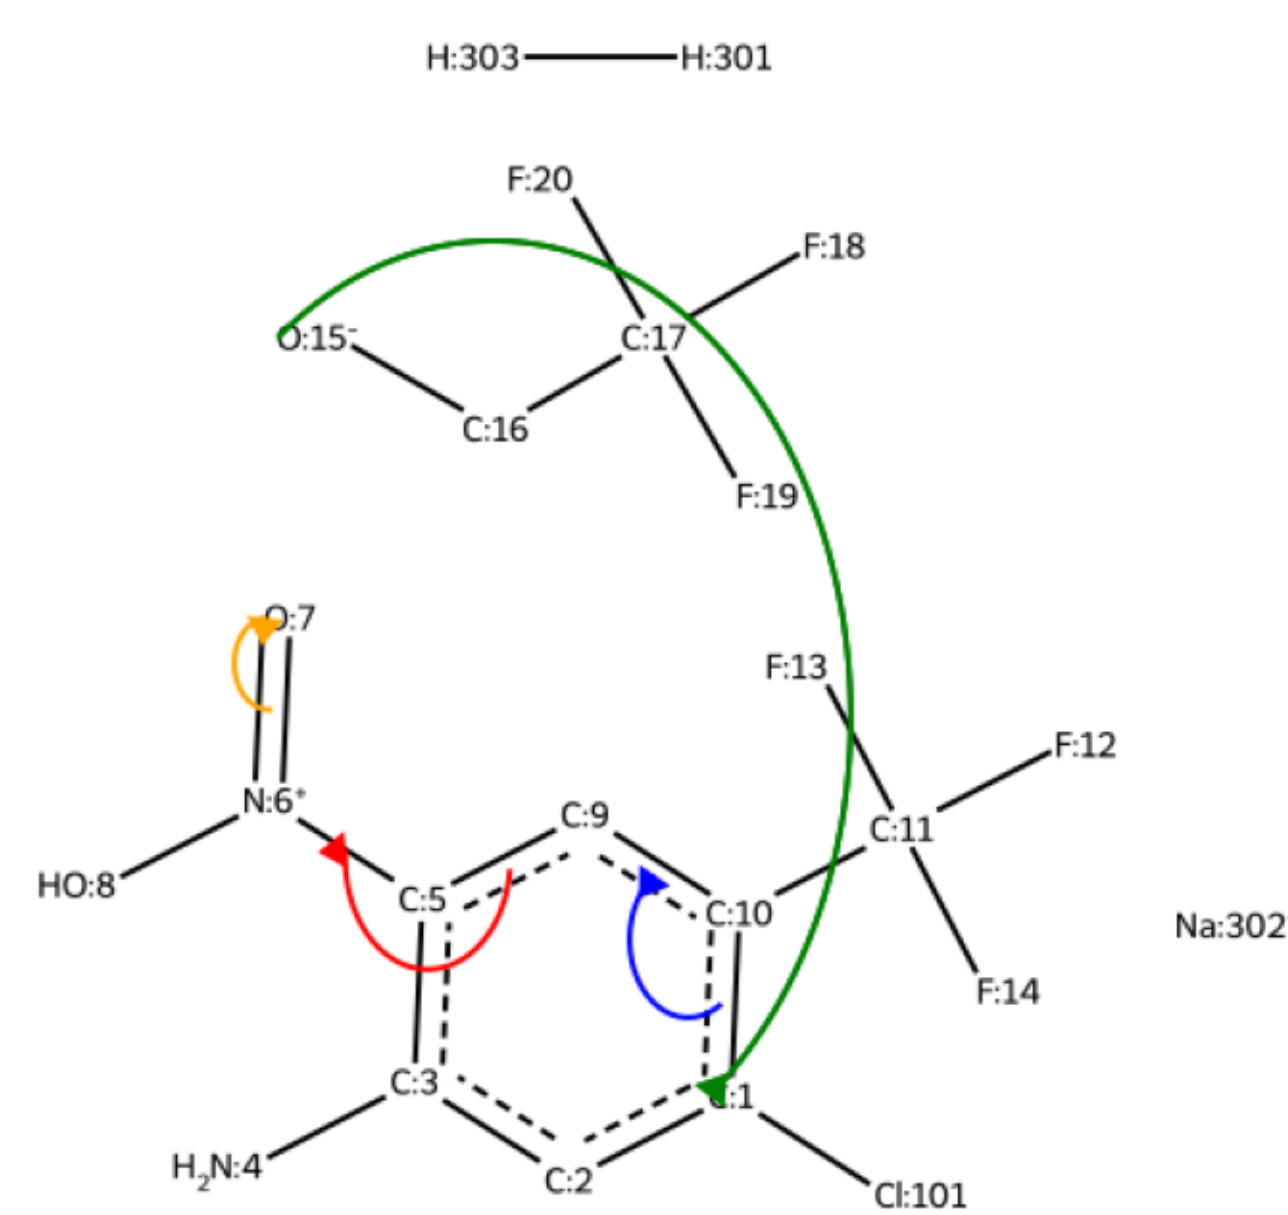

step #3

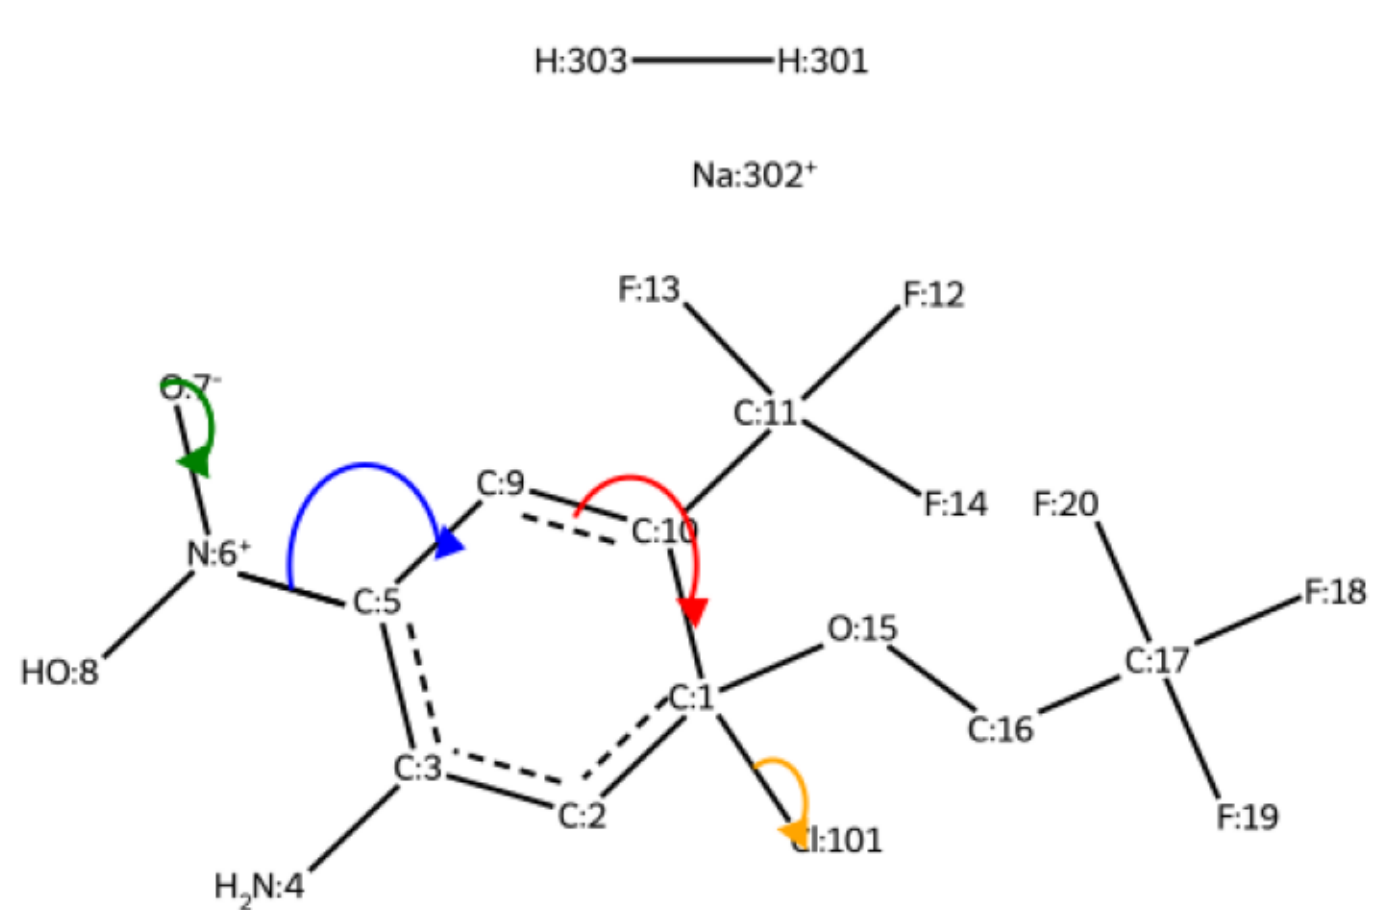

Product(s)

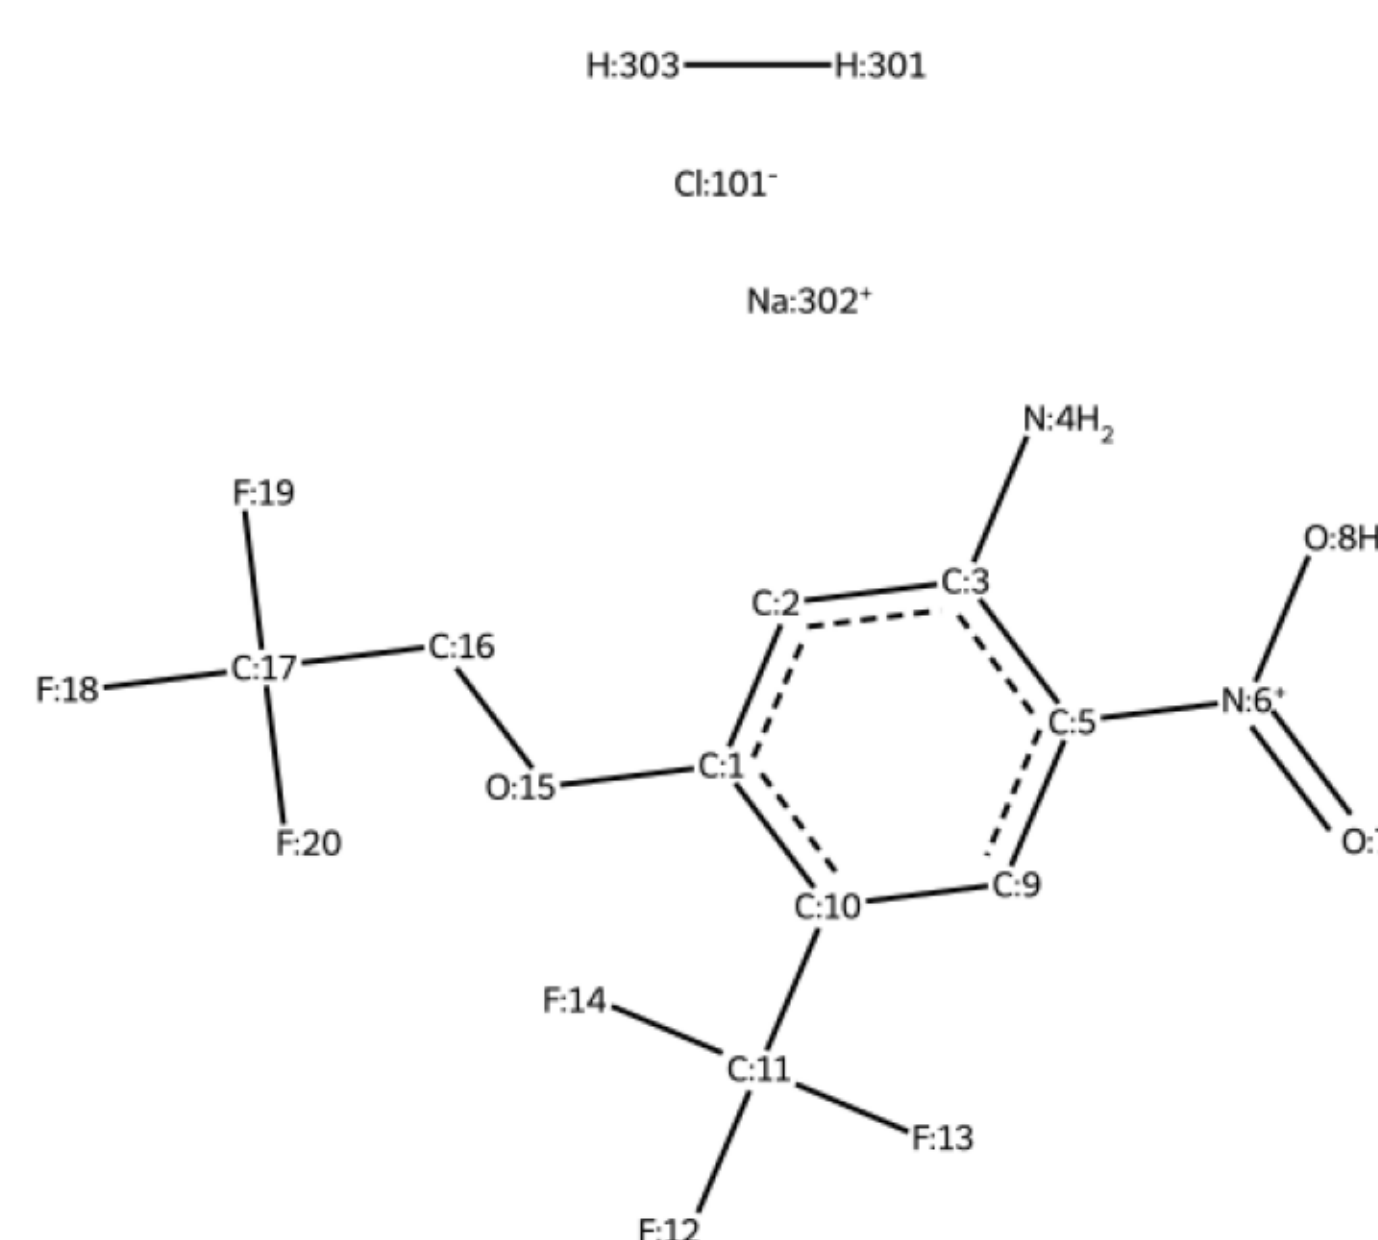



Original reaction  
sampled RXN\_ID:74)

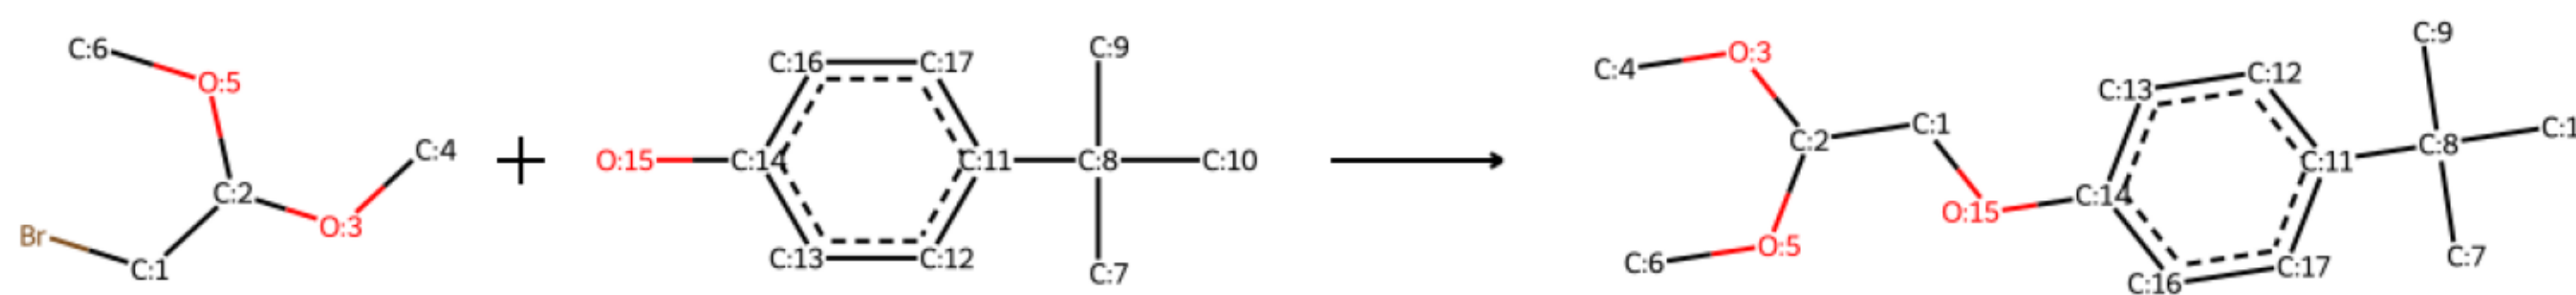

Identified mechanistic class -  
SN2\_alcohol(thiol) reaction

Reaction with missing reagents recovered

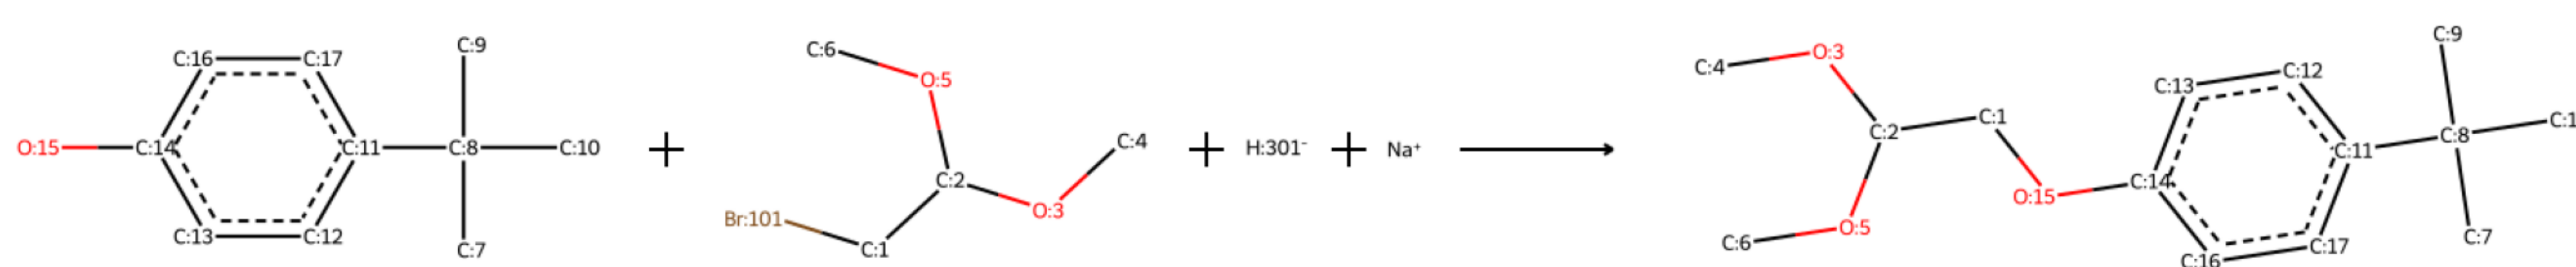

Proposed mechanistic pathway

[Arrow order: (1) green, (2) blue, (3) red, (4) orange]

step #1

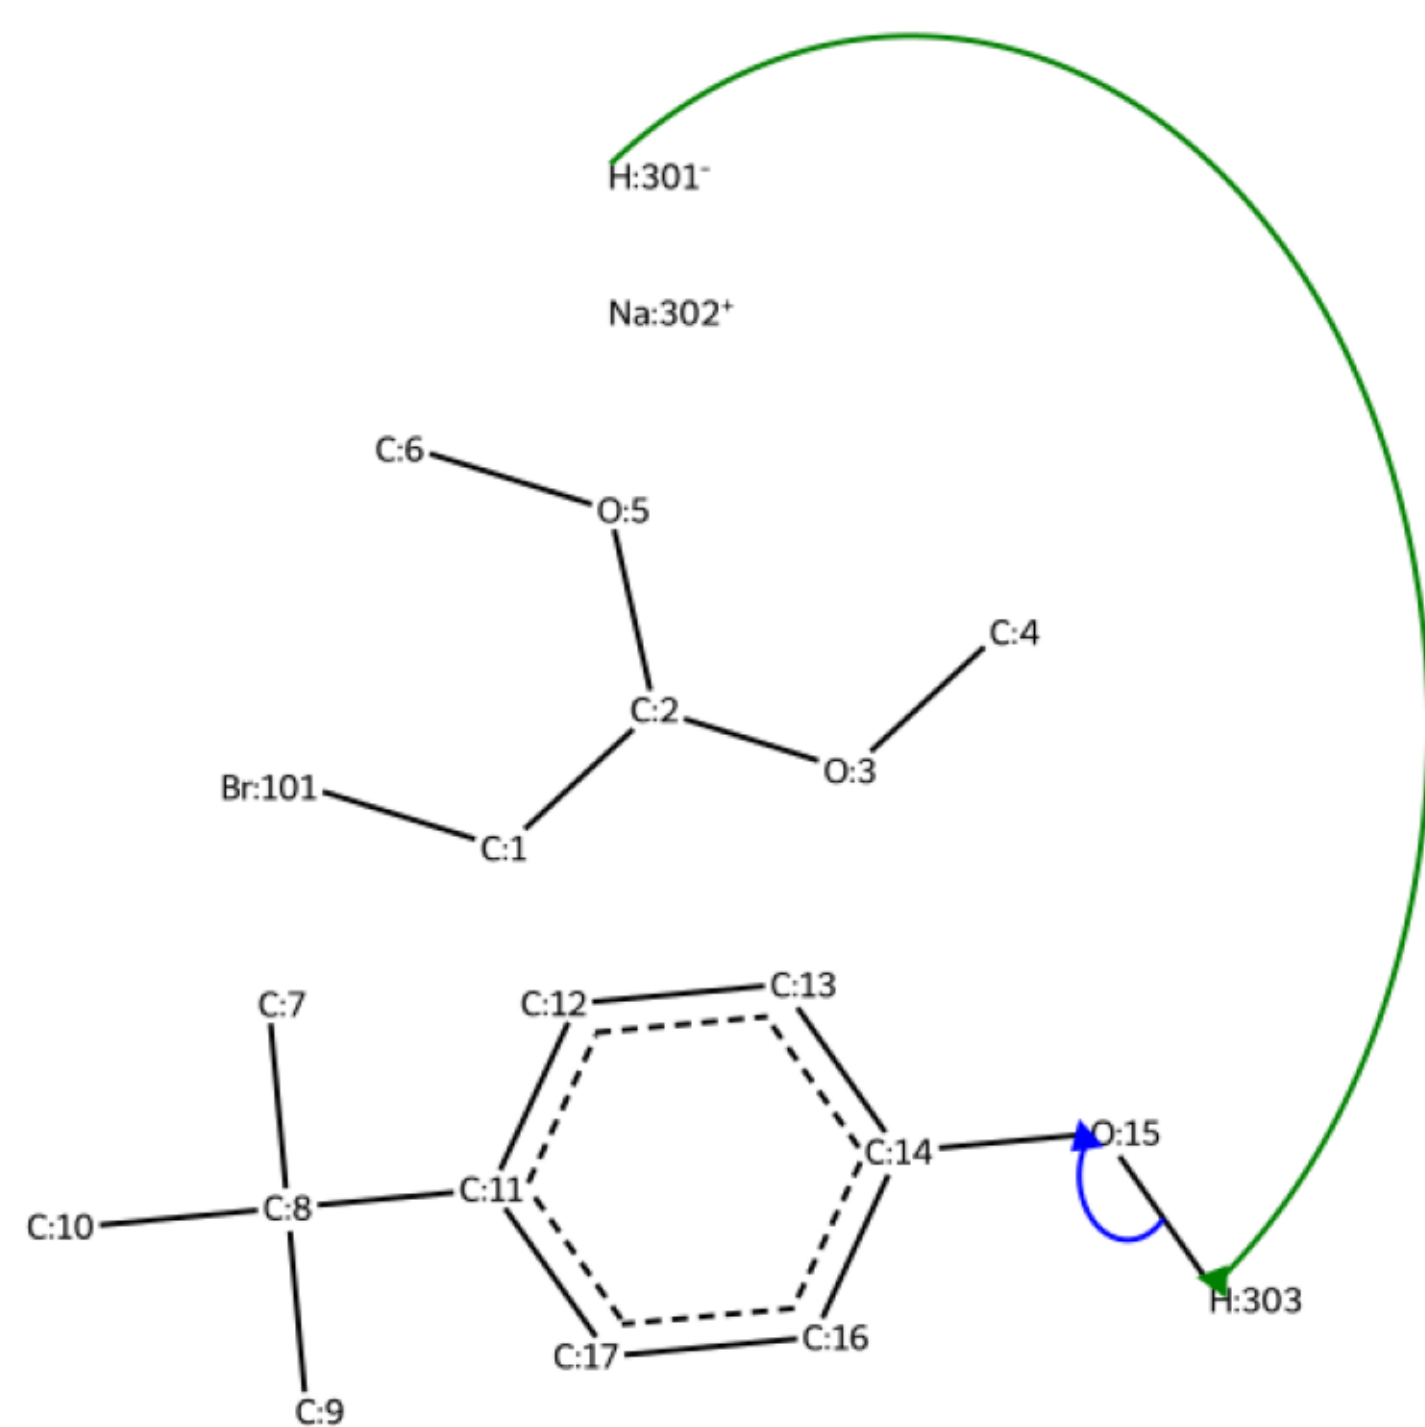

step #2

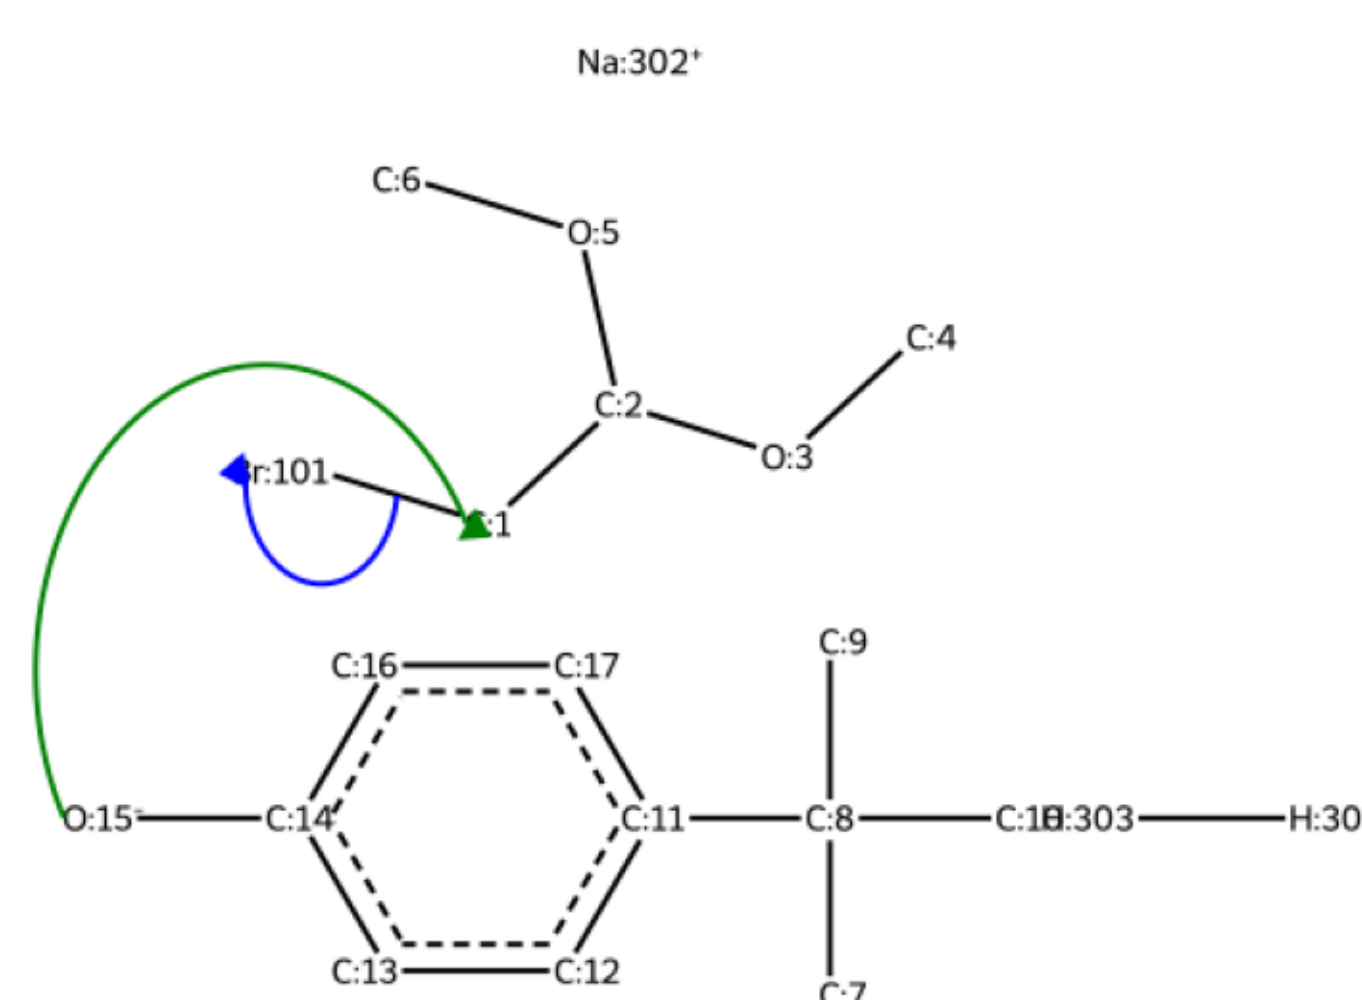

Product(s)

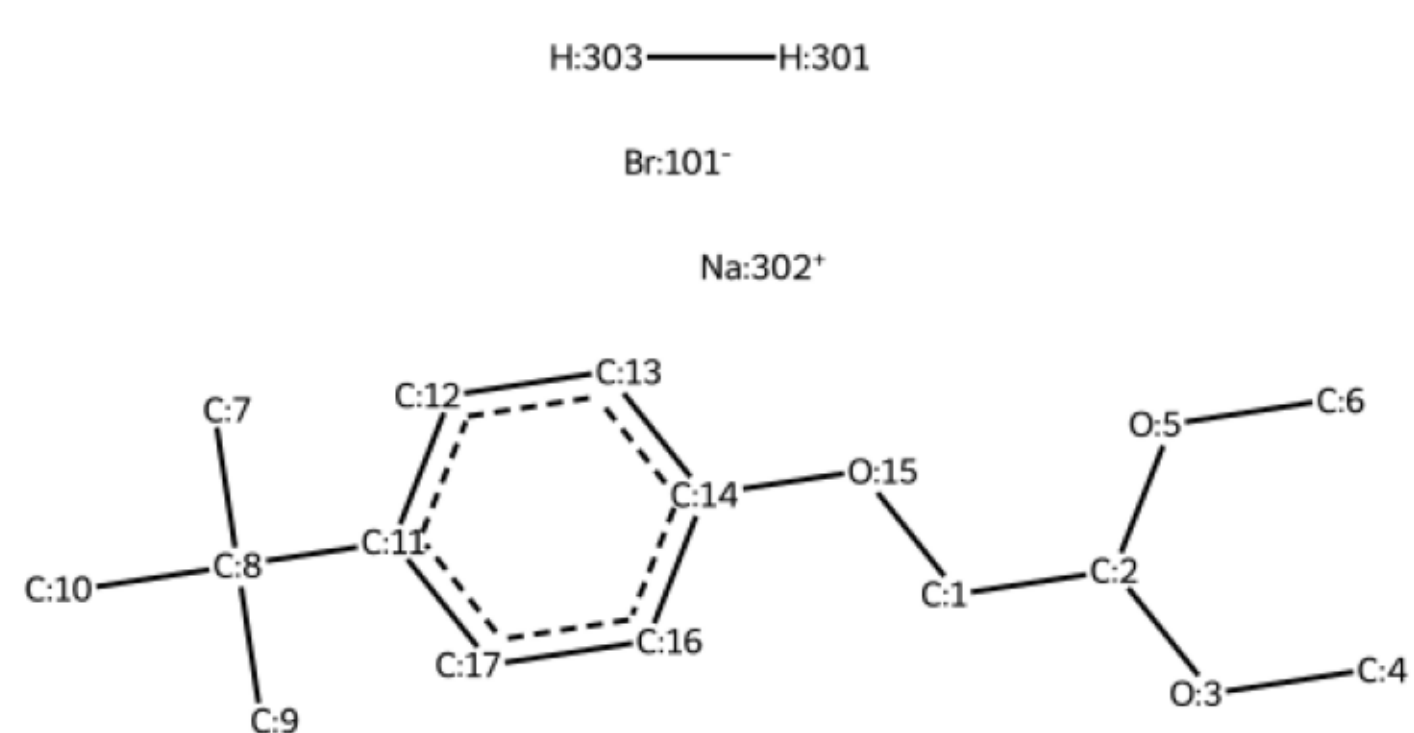



Original reaction  
sampled RXN\_ID:75)

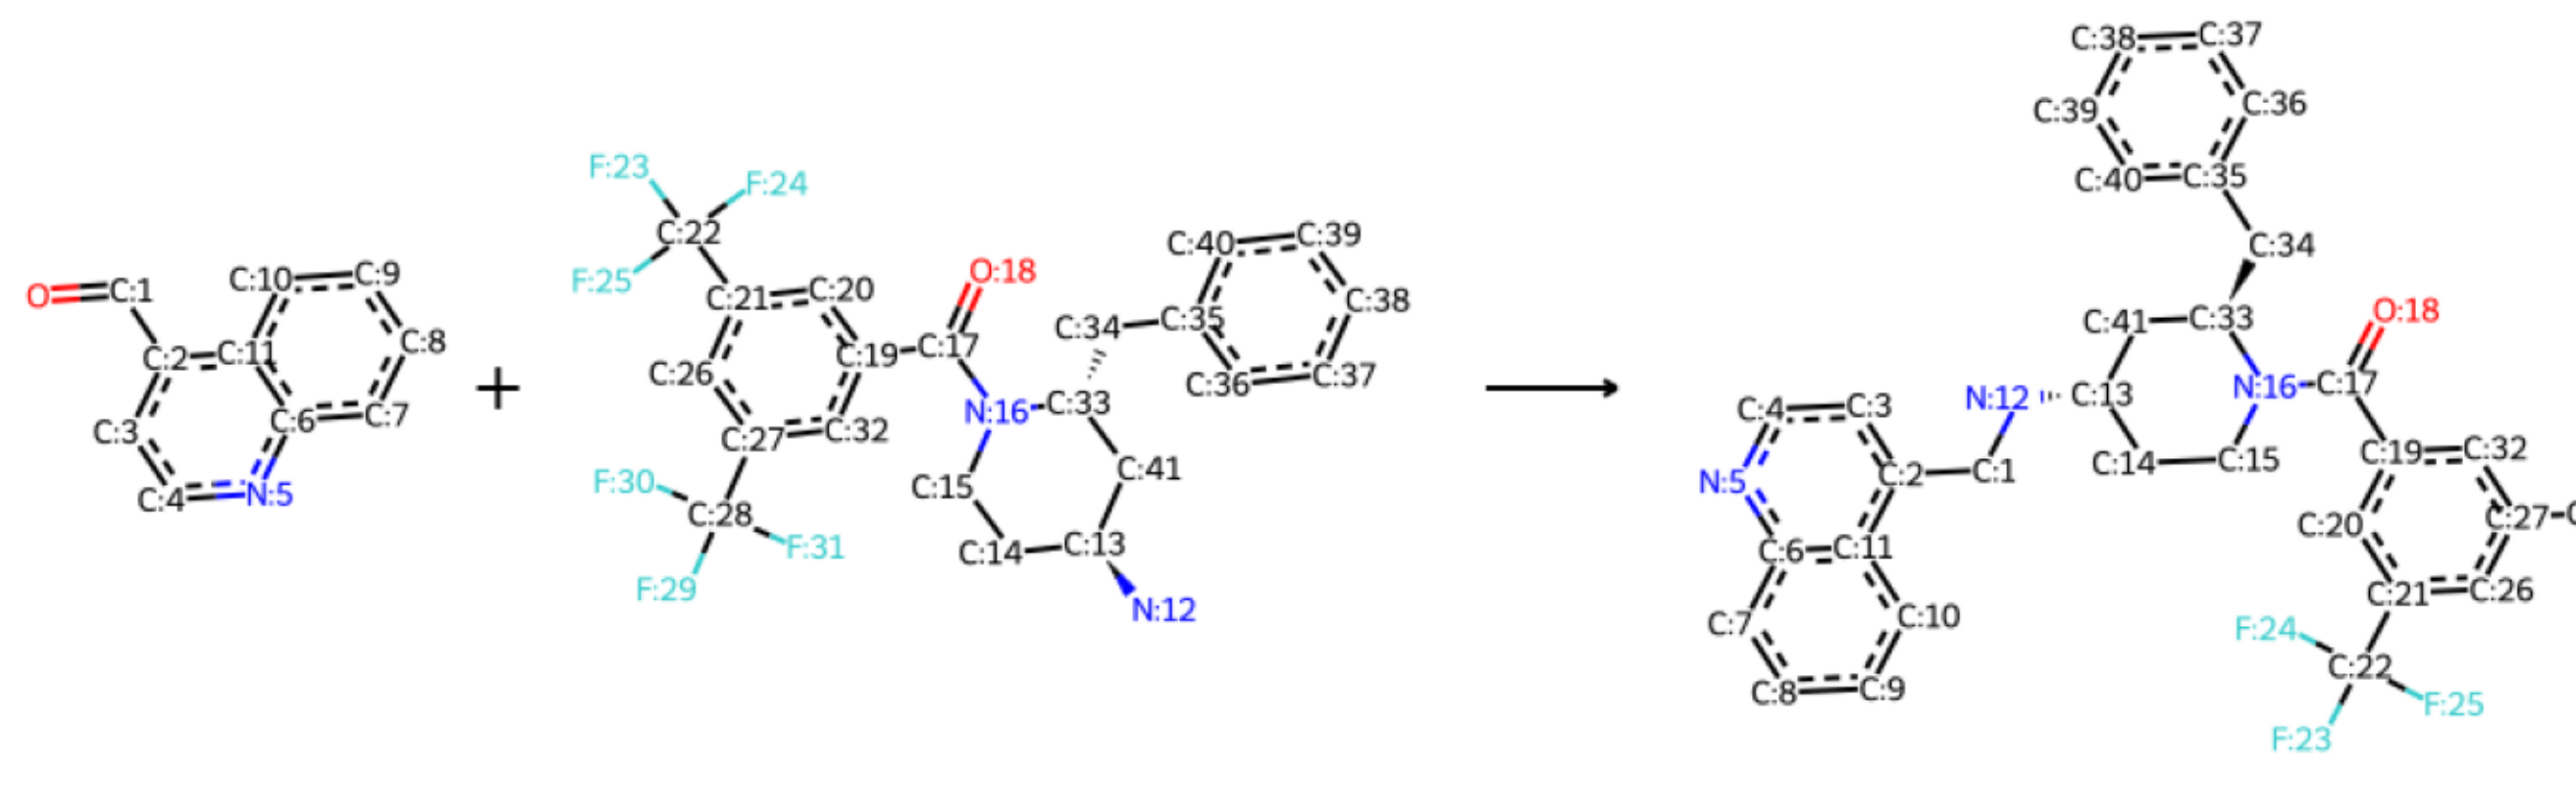

Identified mechanistic class -  
reductive\_amination reaction

Reaction with missing reagents recovered

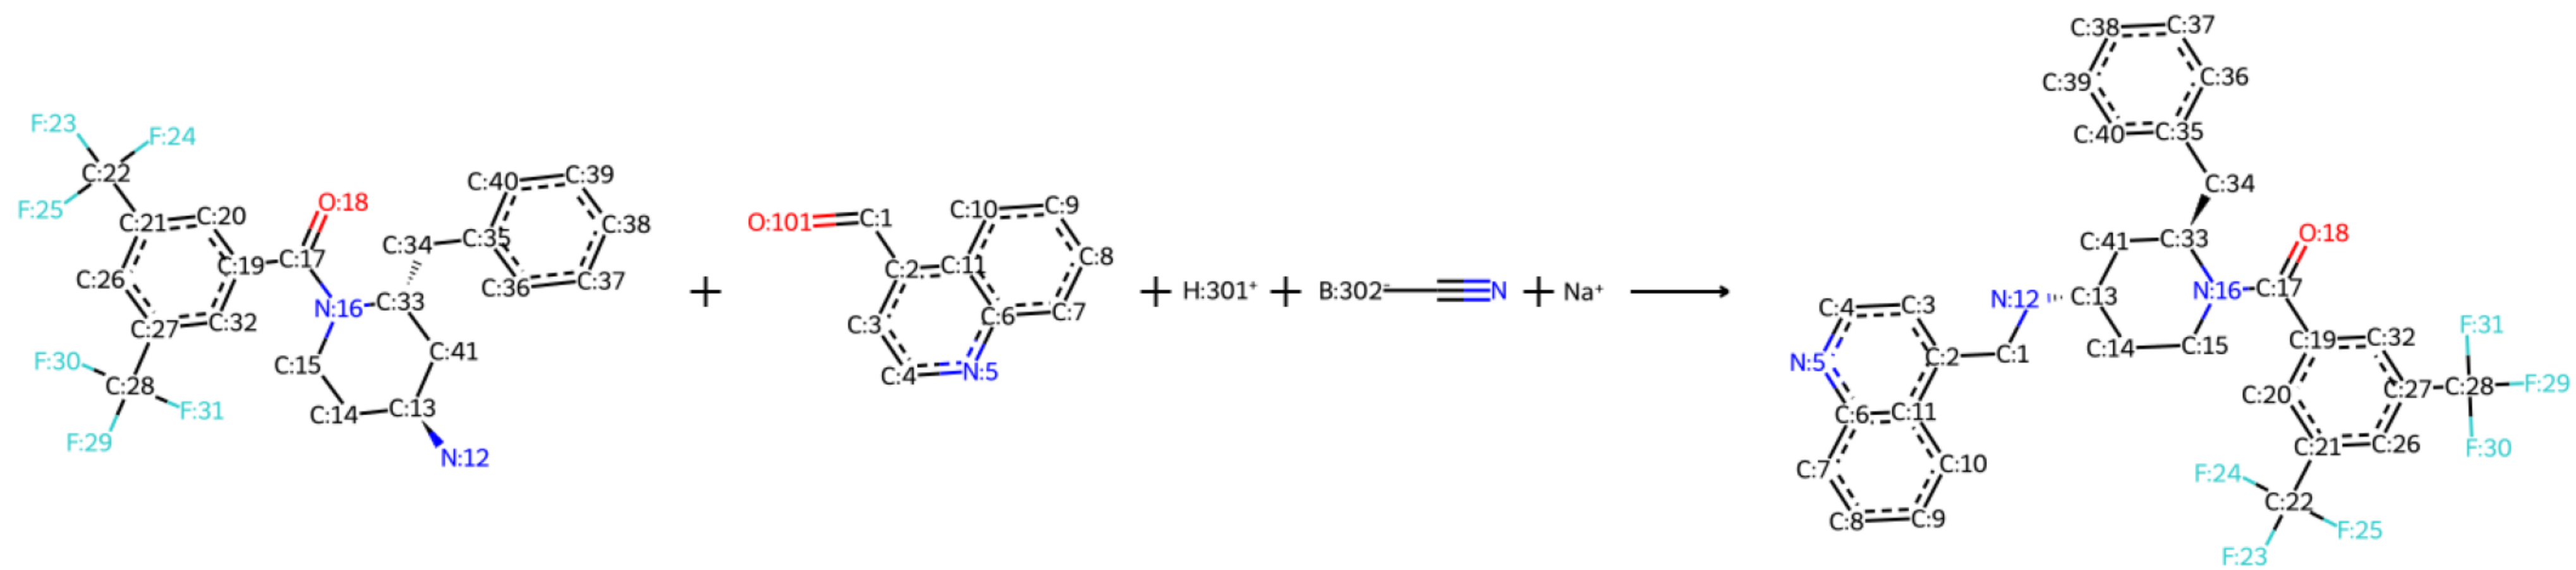

Proposed mechanistic pathway

[Arrow order: (1) green, (2) blue, (3) red, (4) orange]

step #1

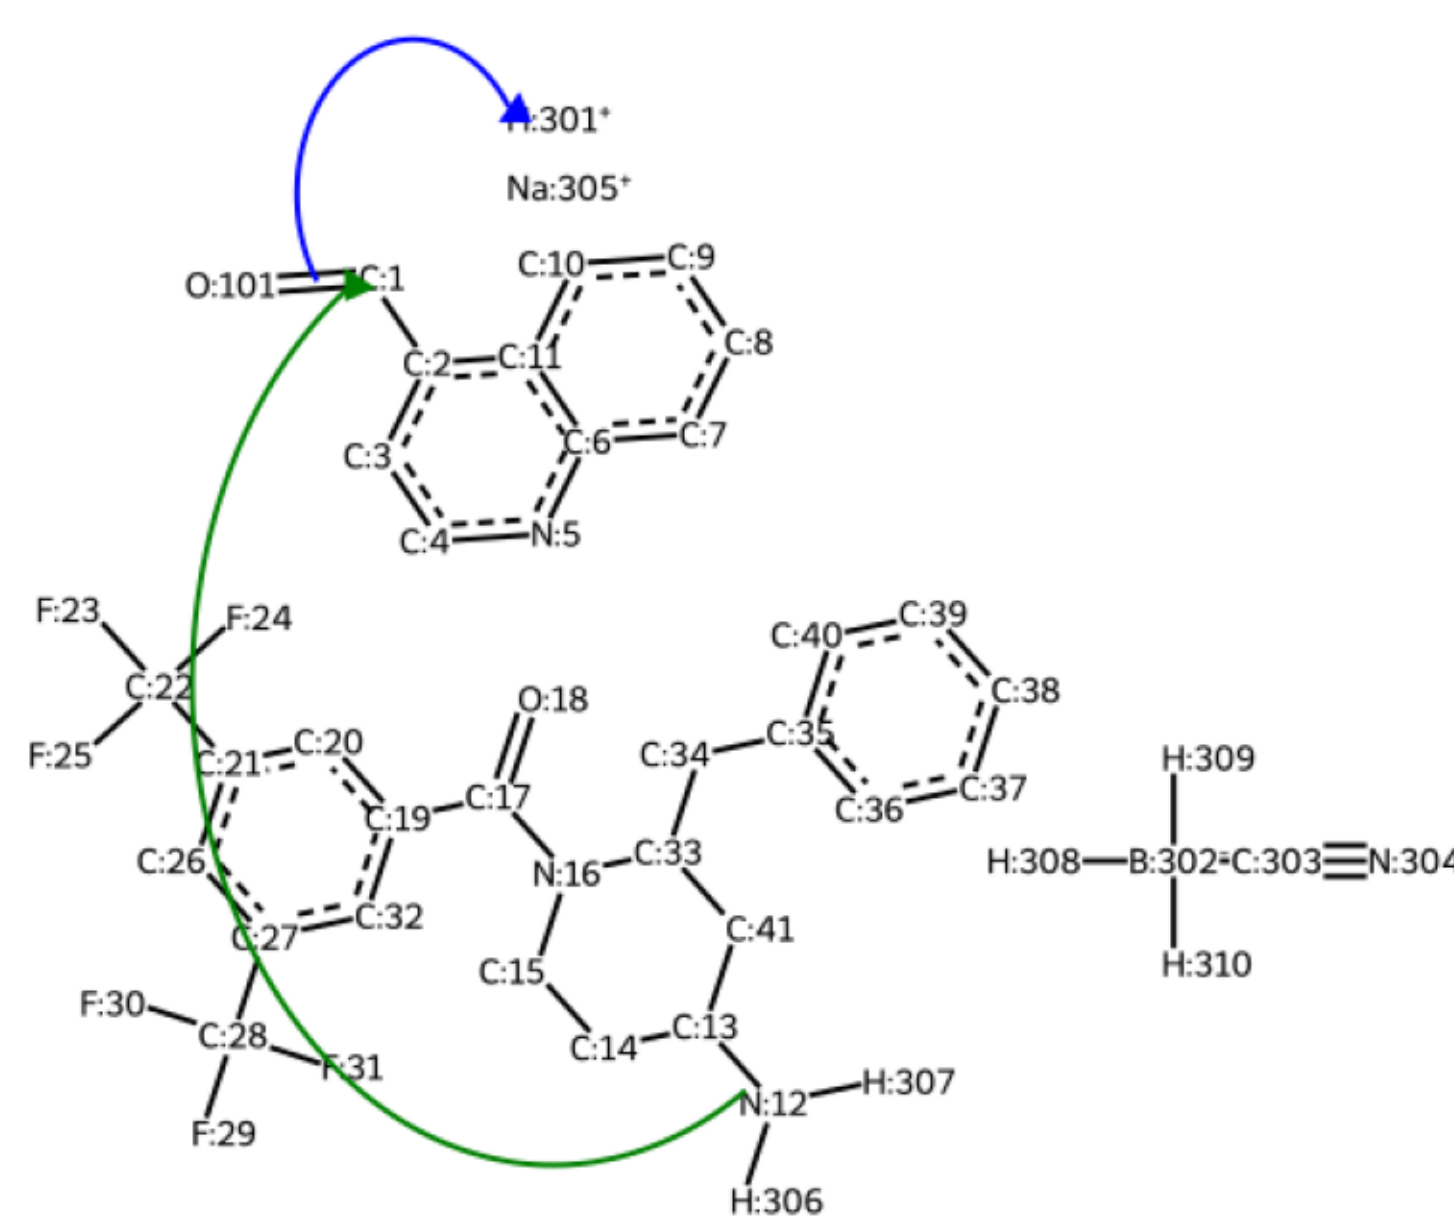

step #2

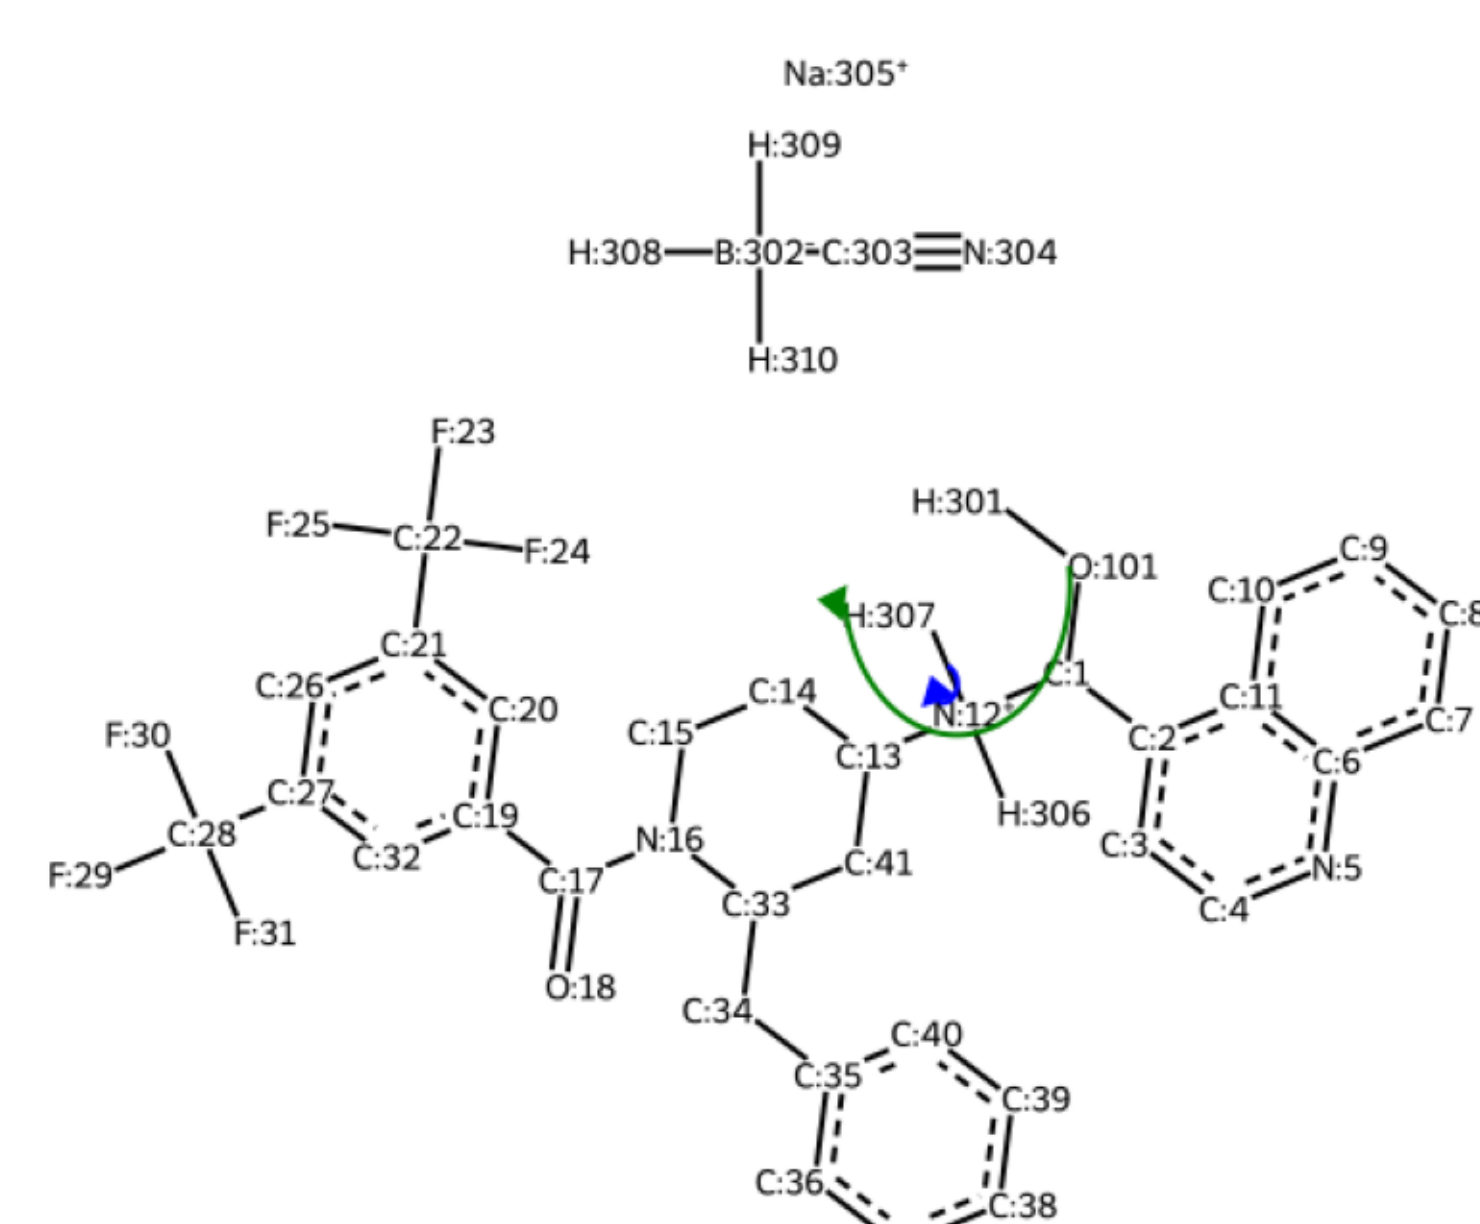

step #3

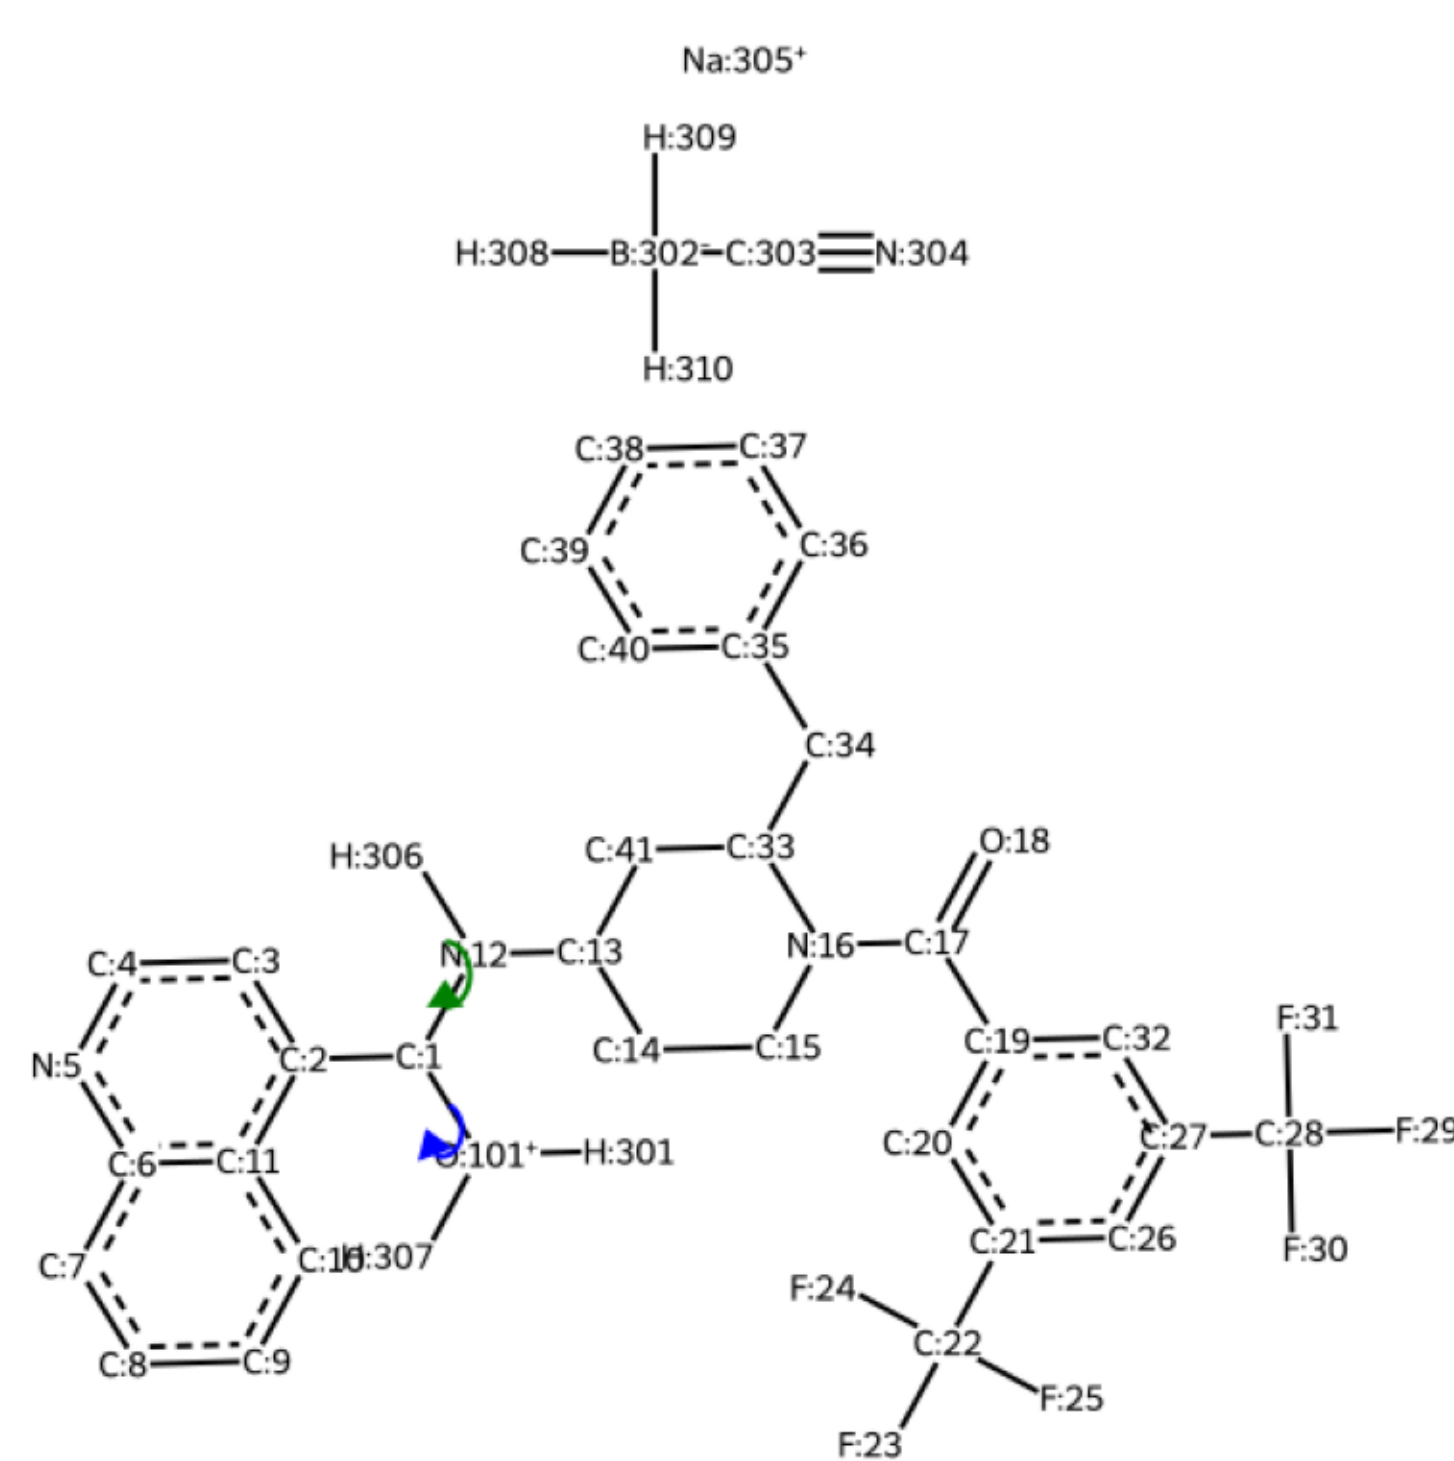

step #4

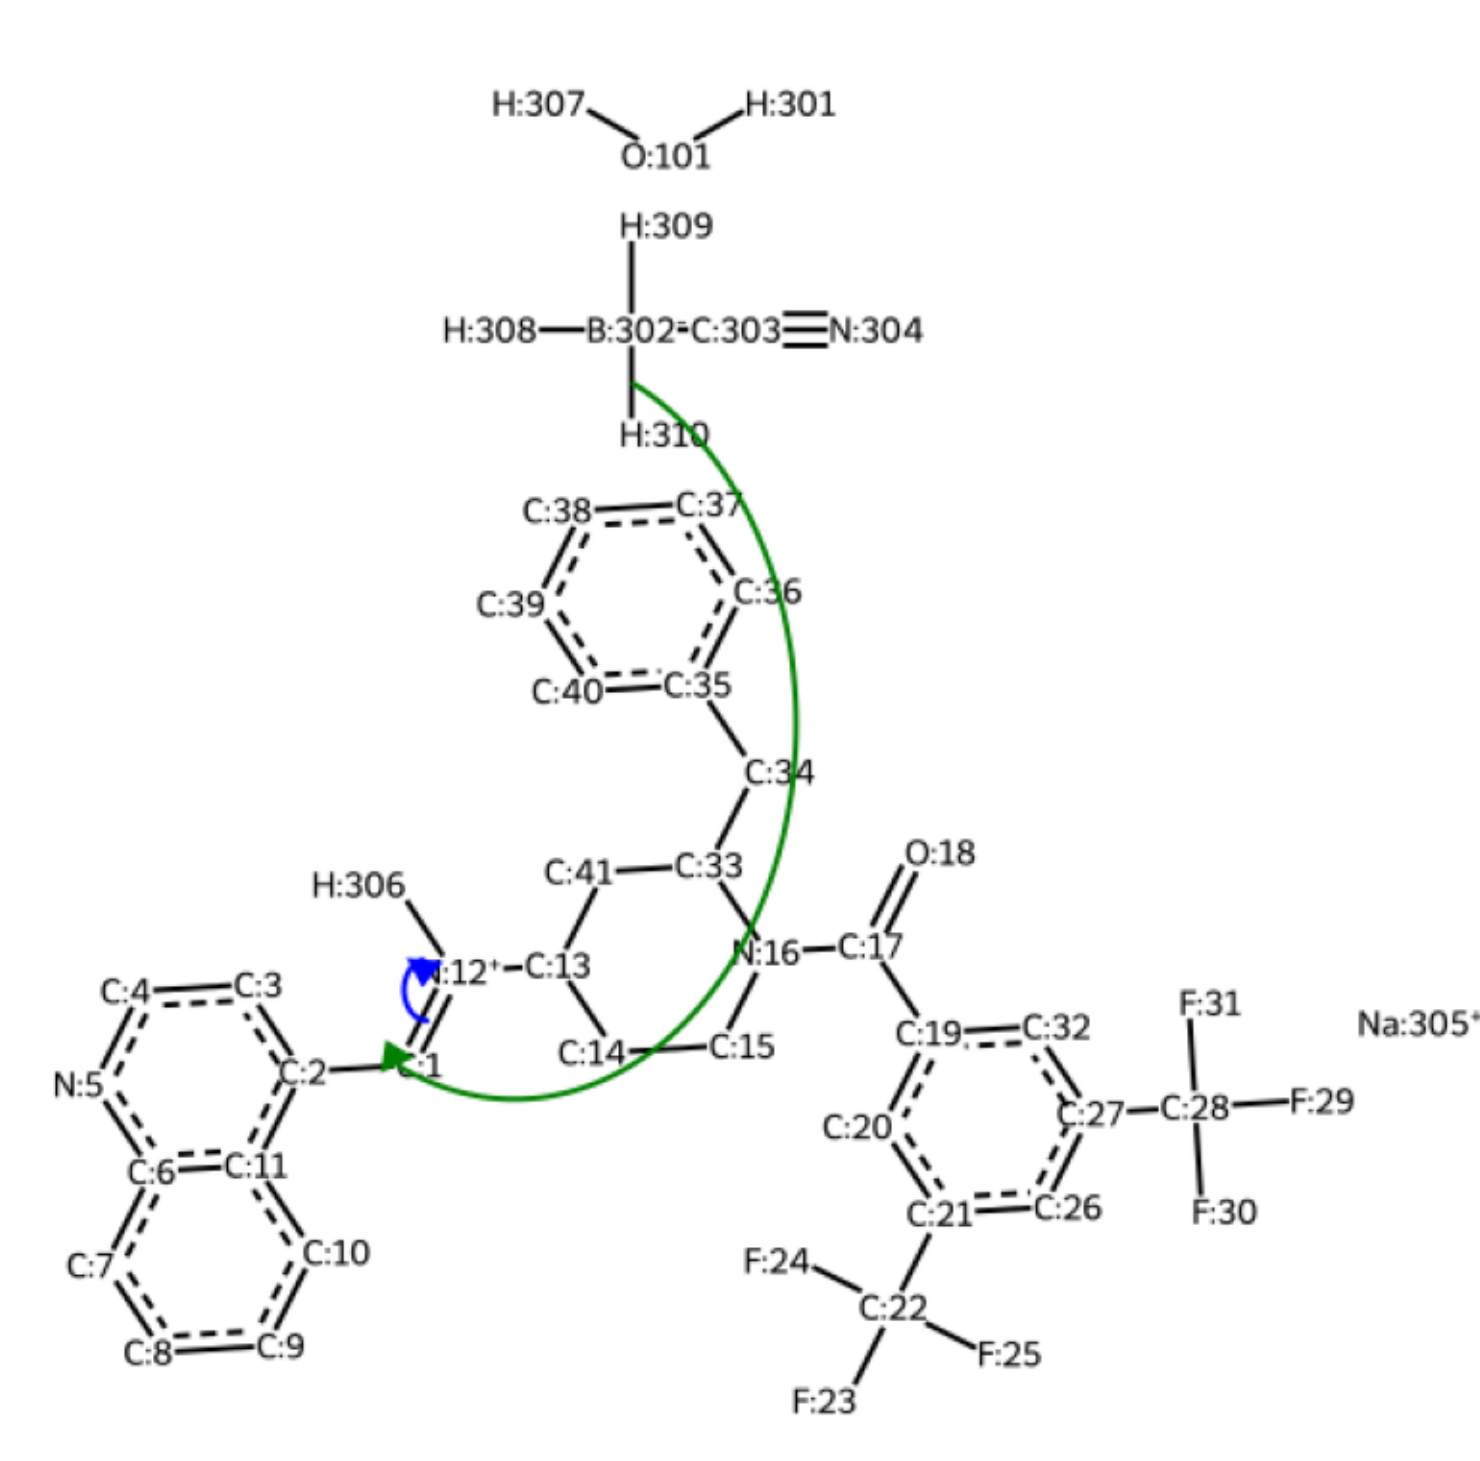

Product(s)

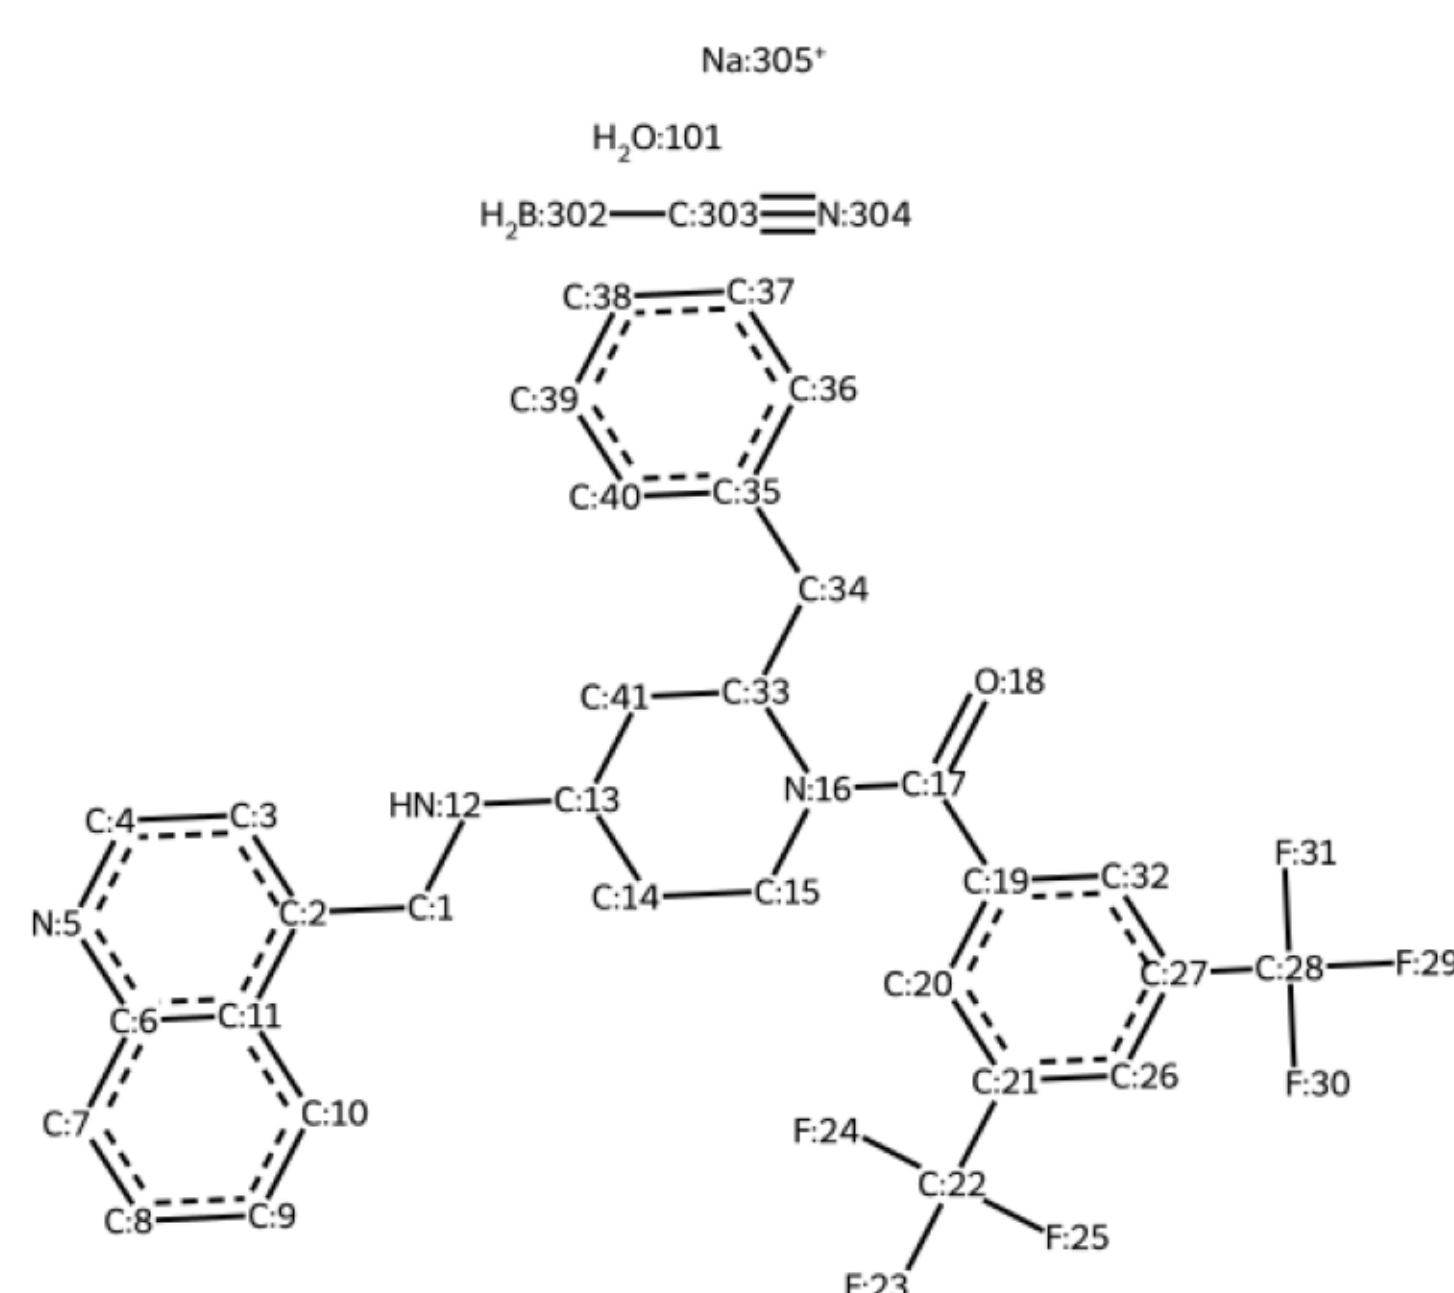



Original reaction  
sampled RXN\_ID:76)

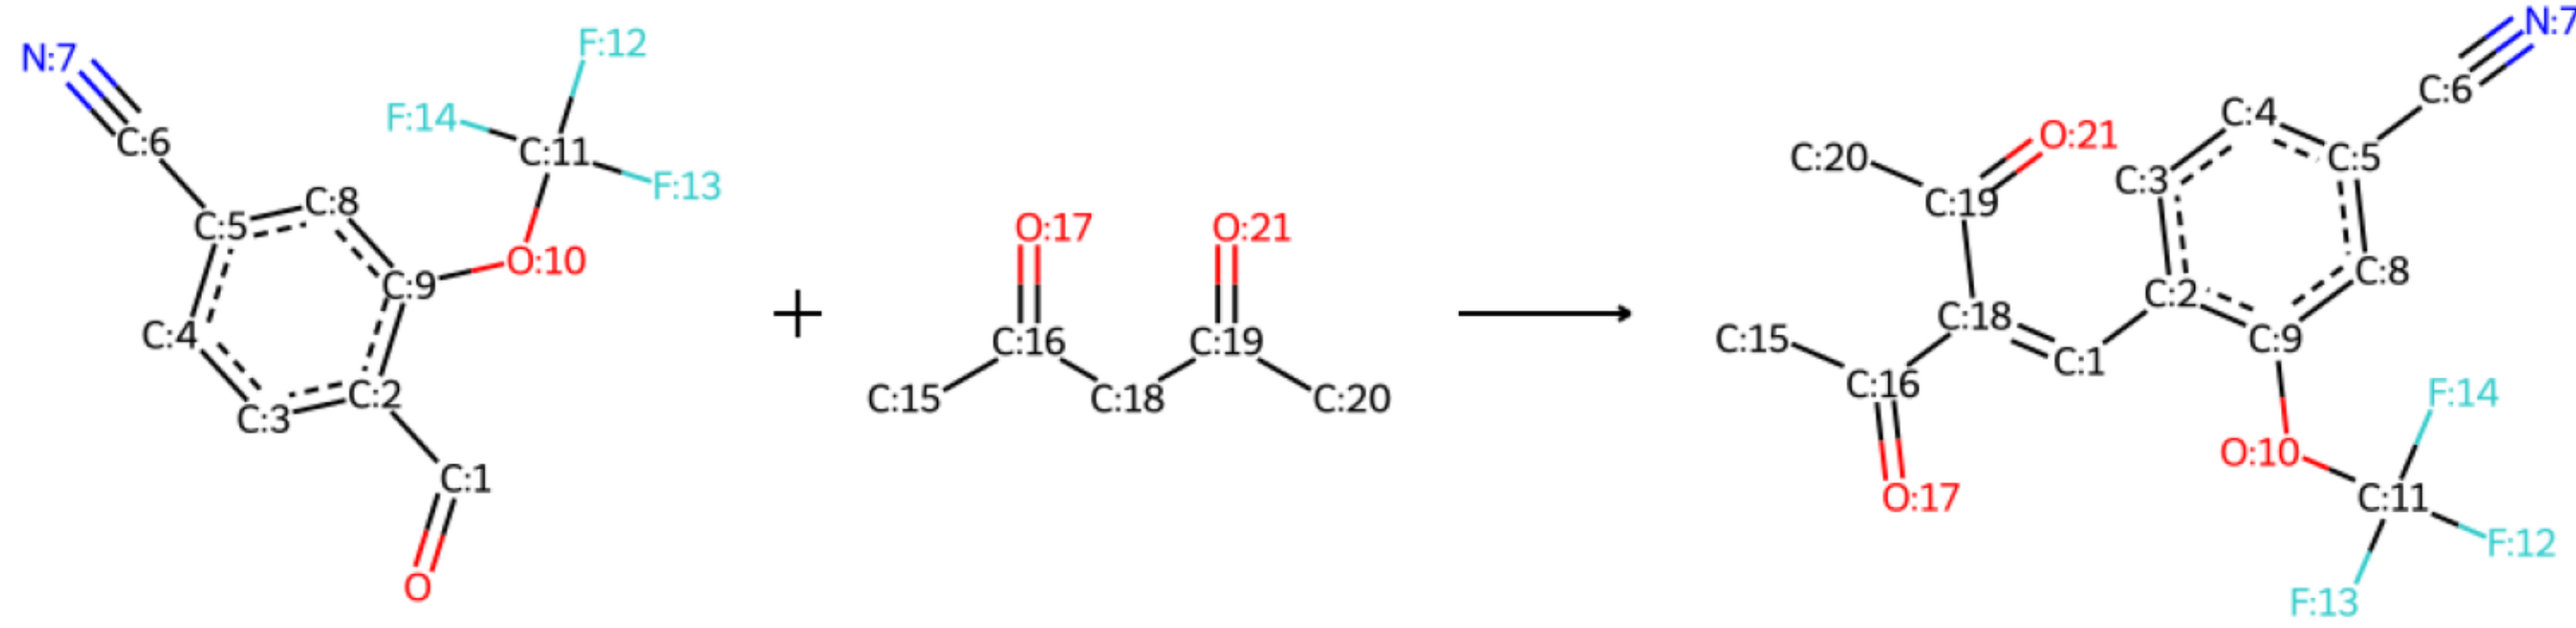

Identified mechanistic class -  
aldol\_condensation reaction

Reaction with missing reagents recovered

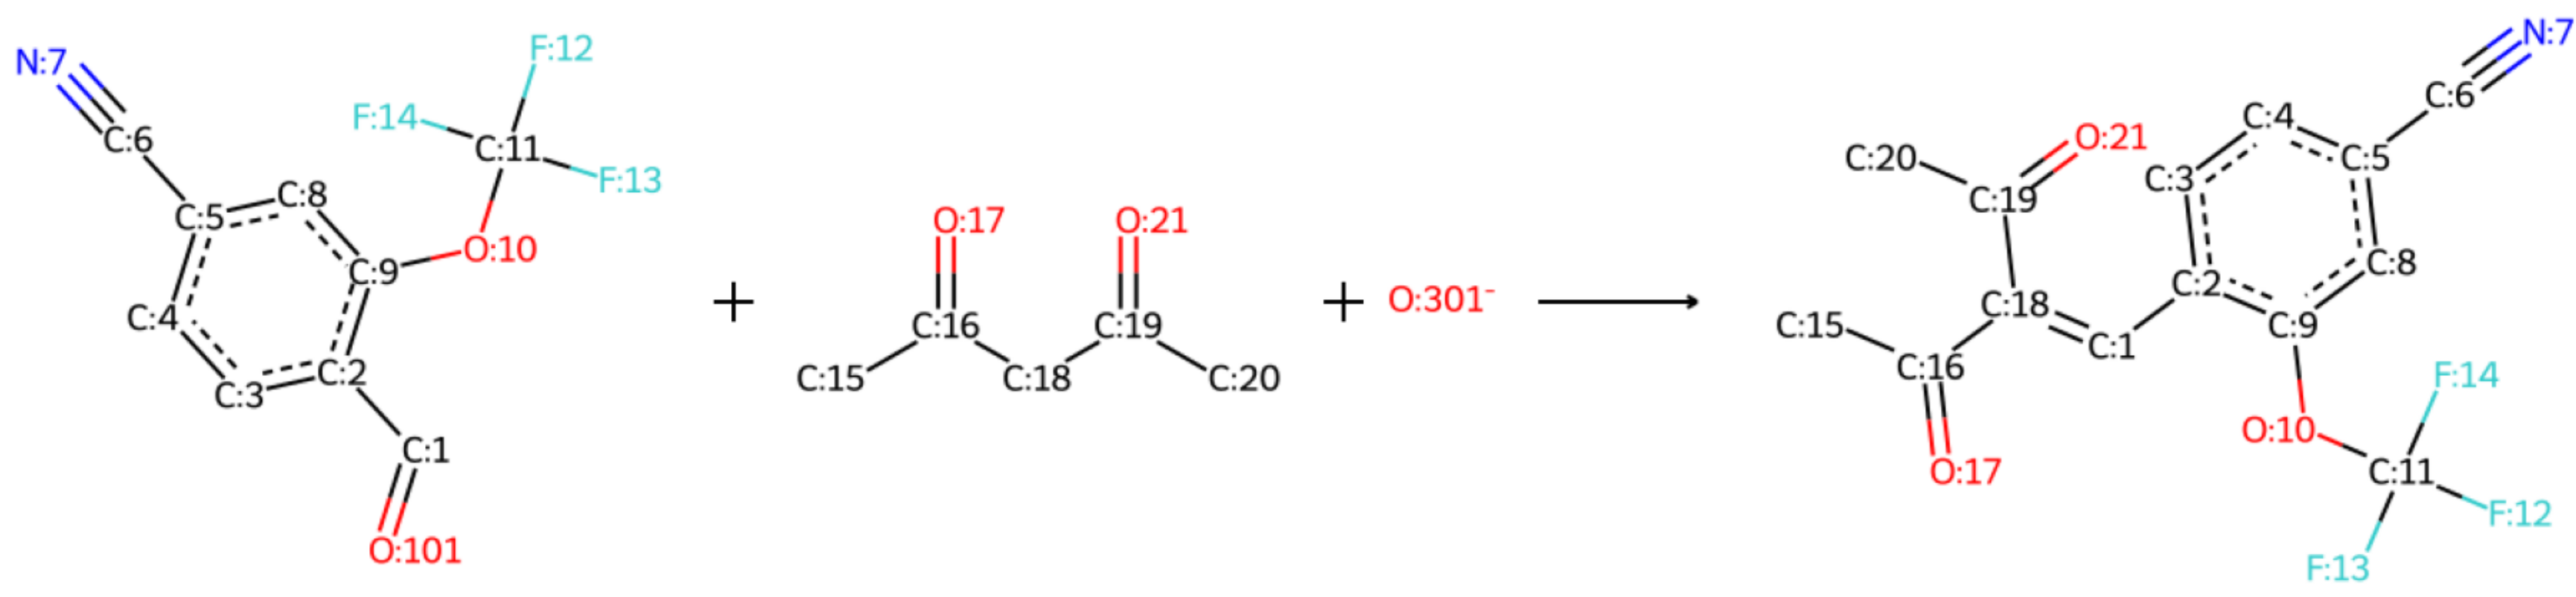

Proposed mechanistic pathway

[Arrow order: (1) green, (2) blue, (3) red, (4) orange]

step #1

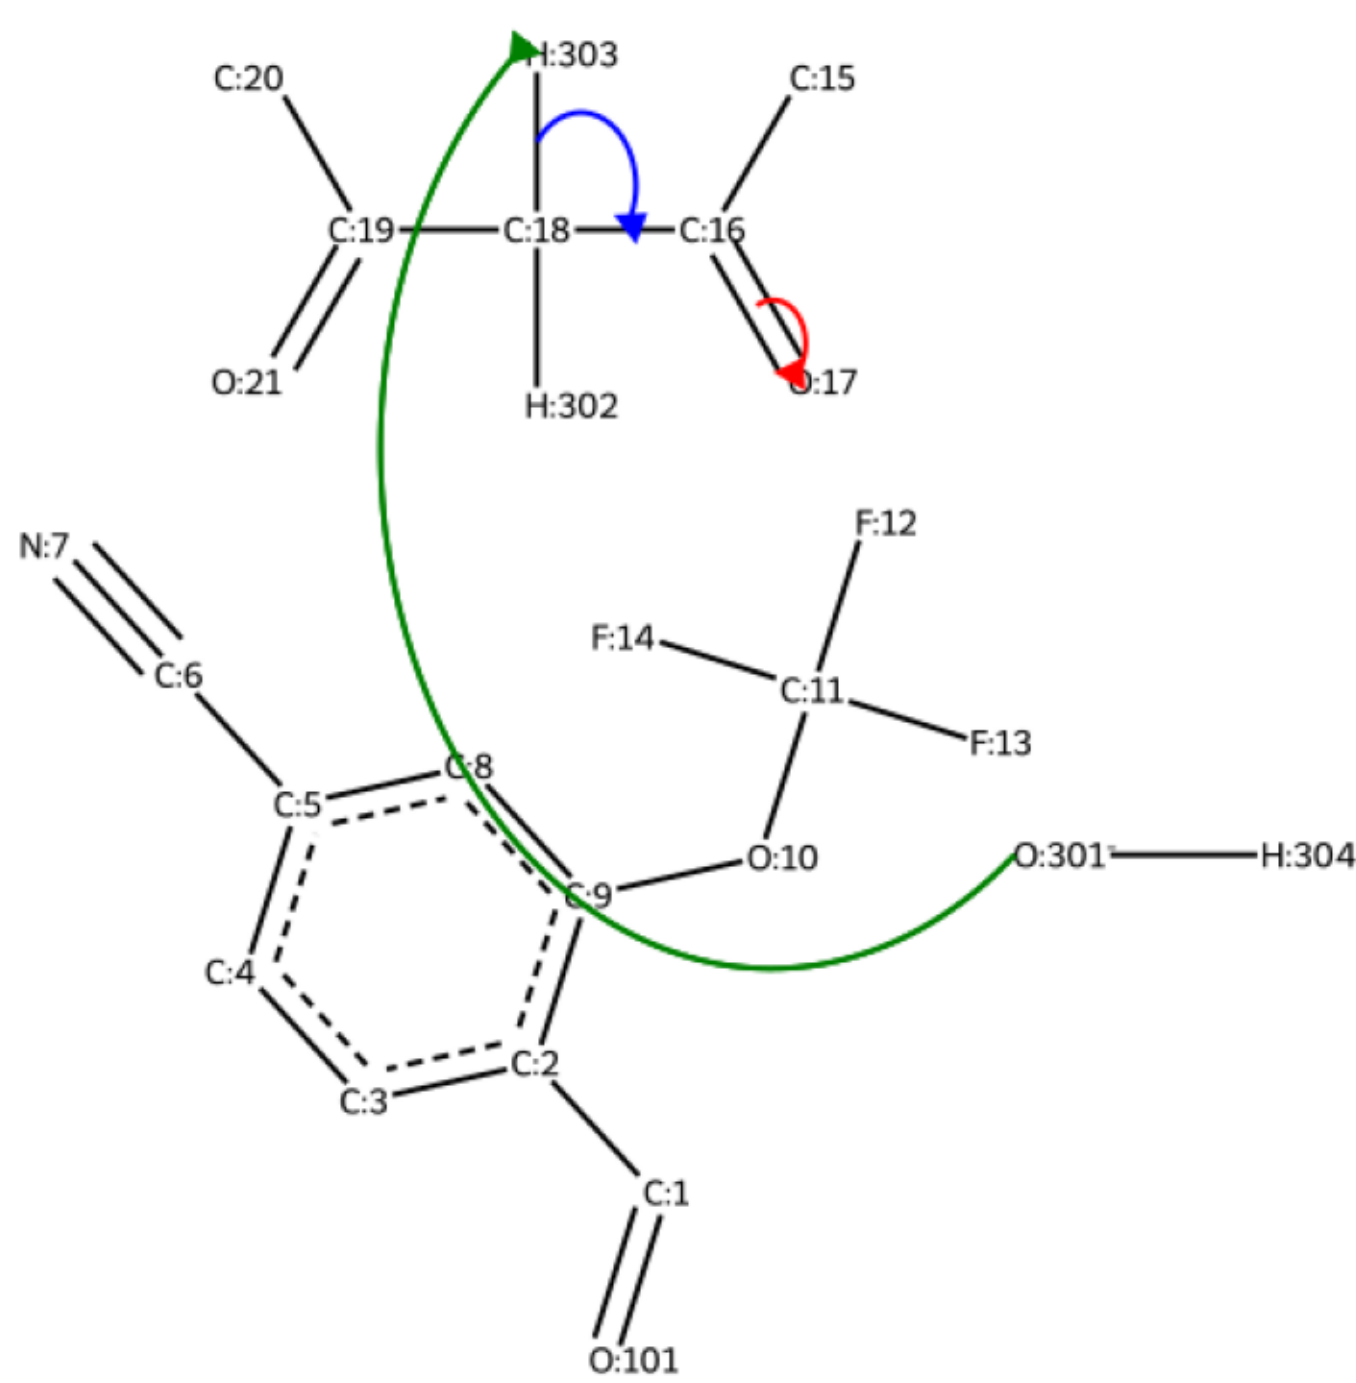

step #2

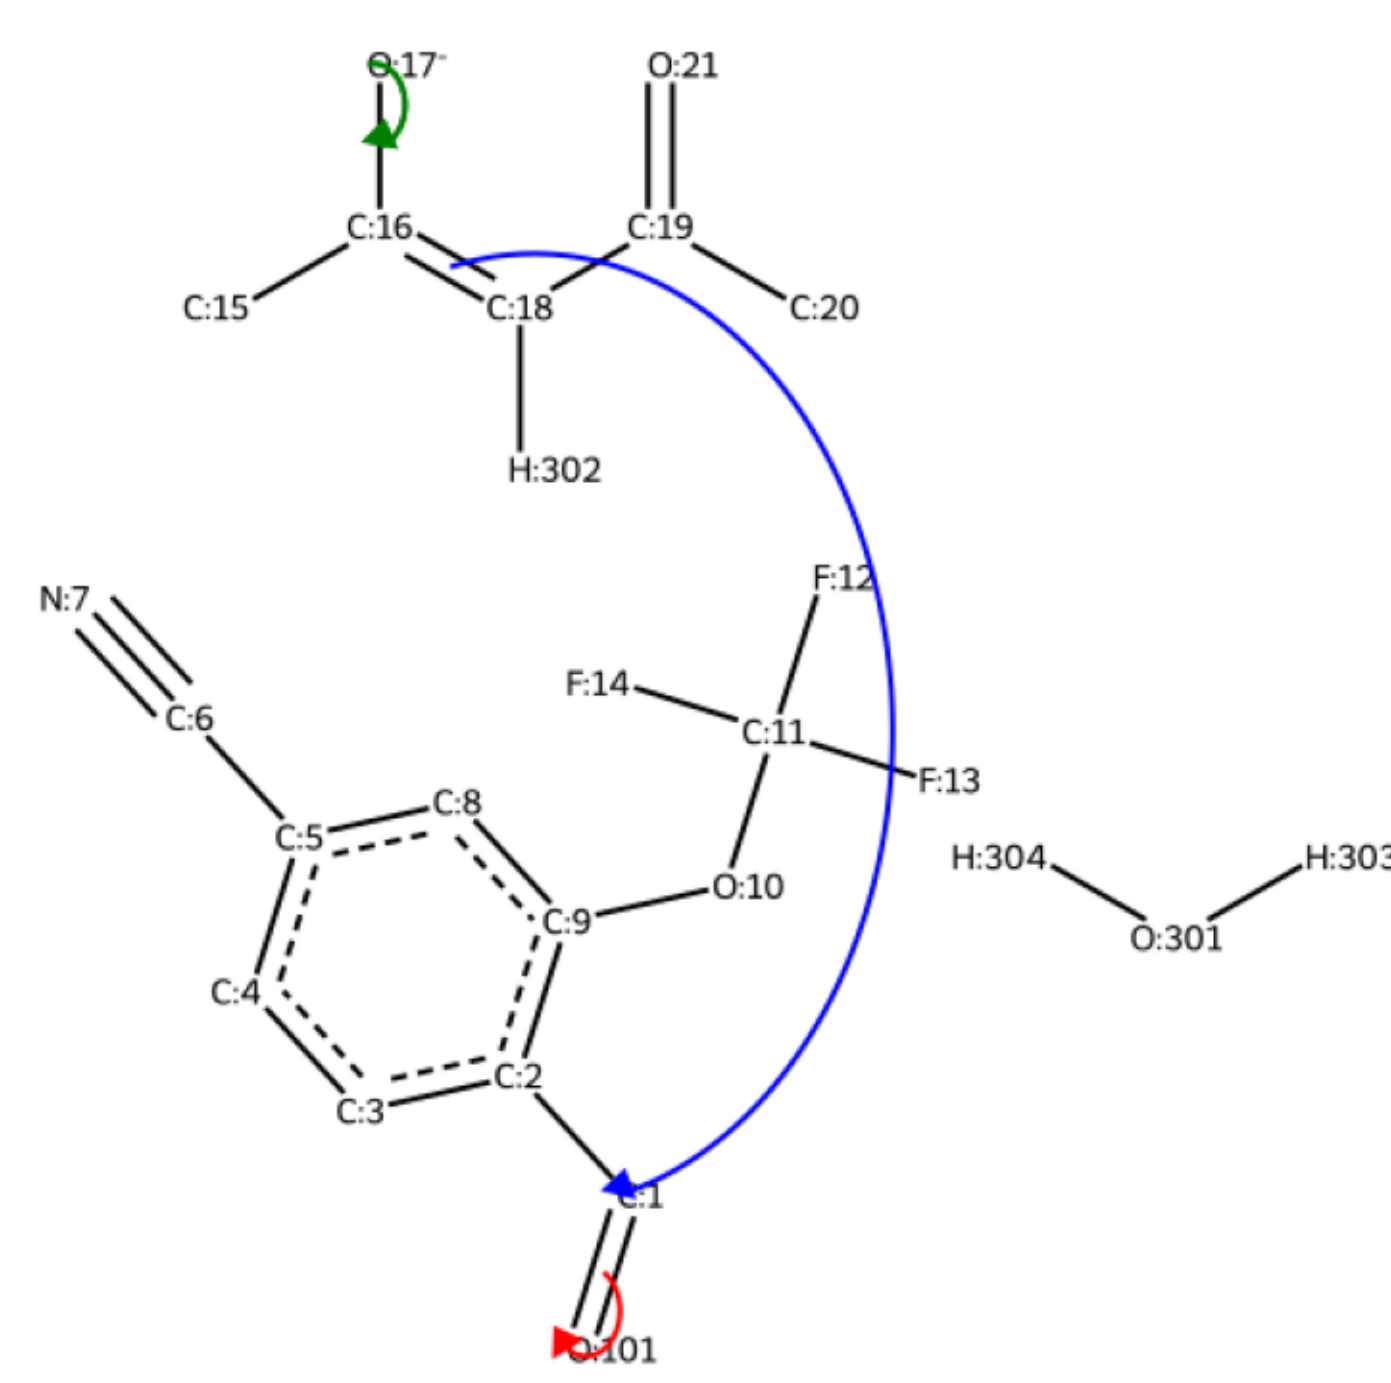

step #3

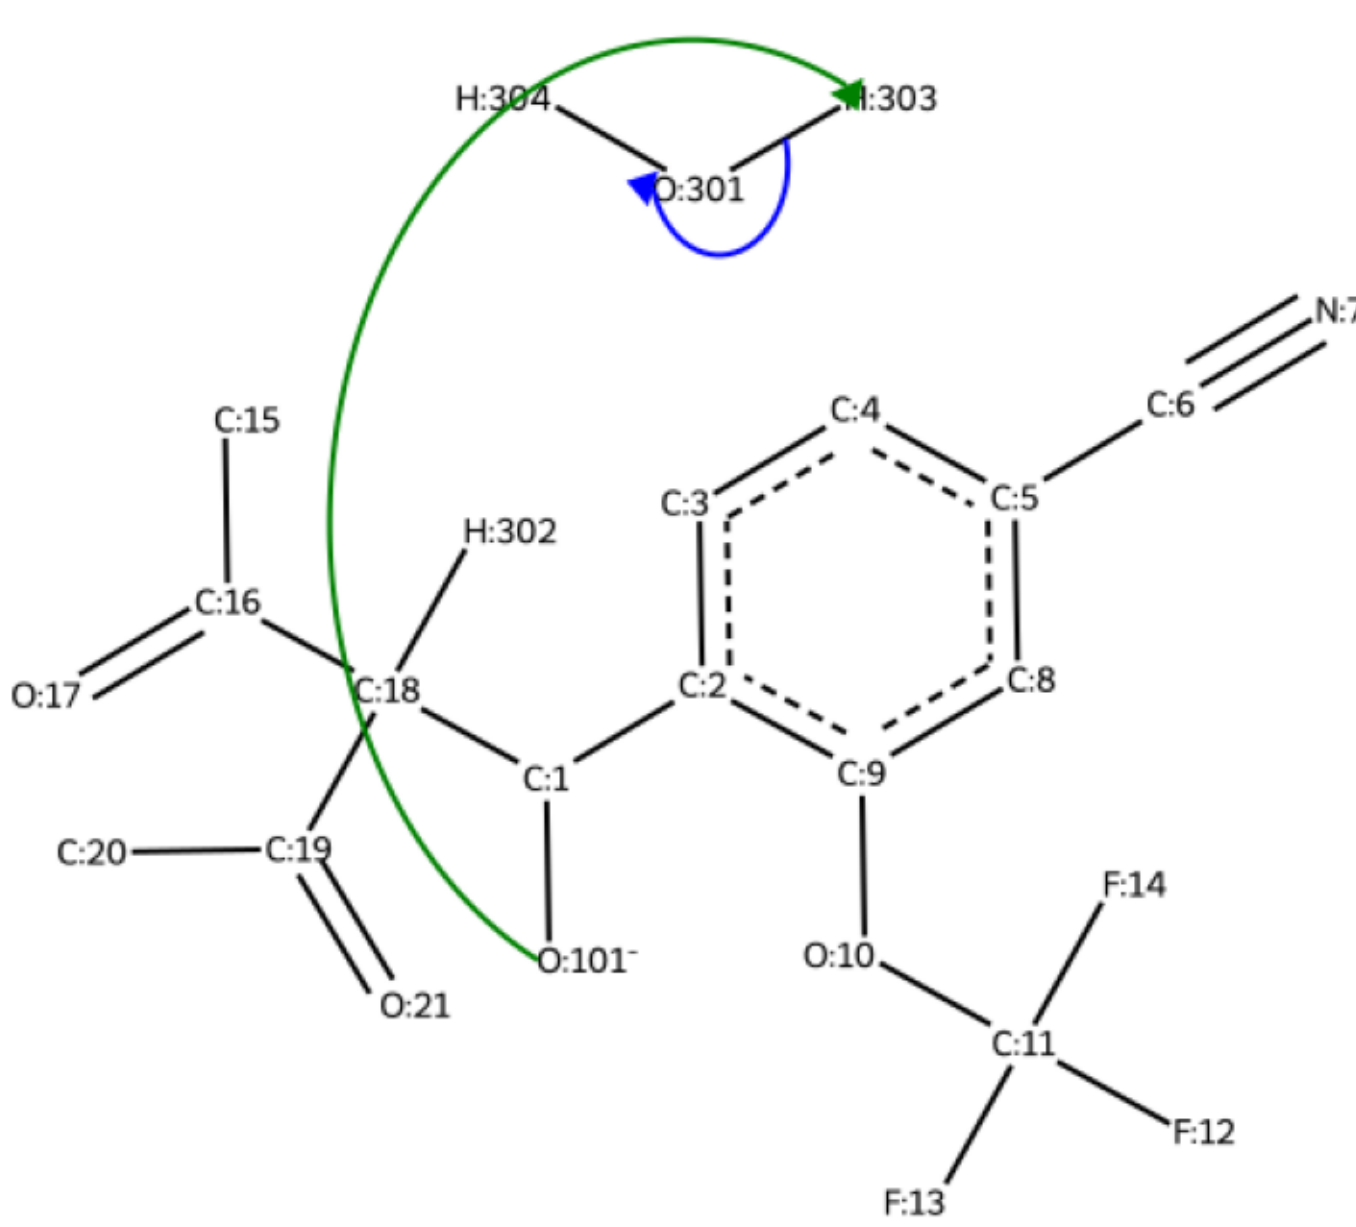

step #4

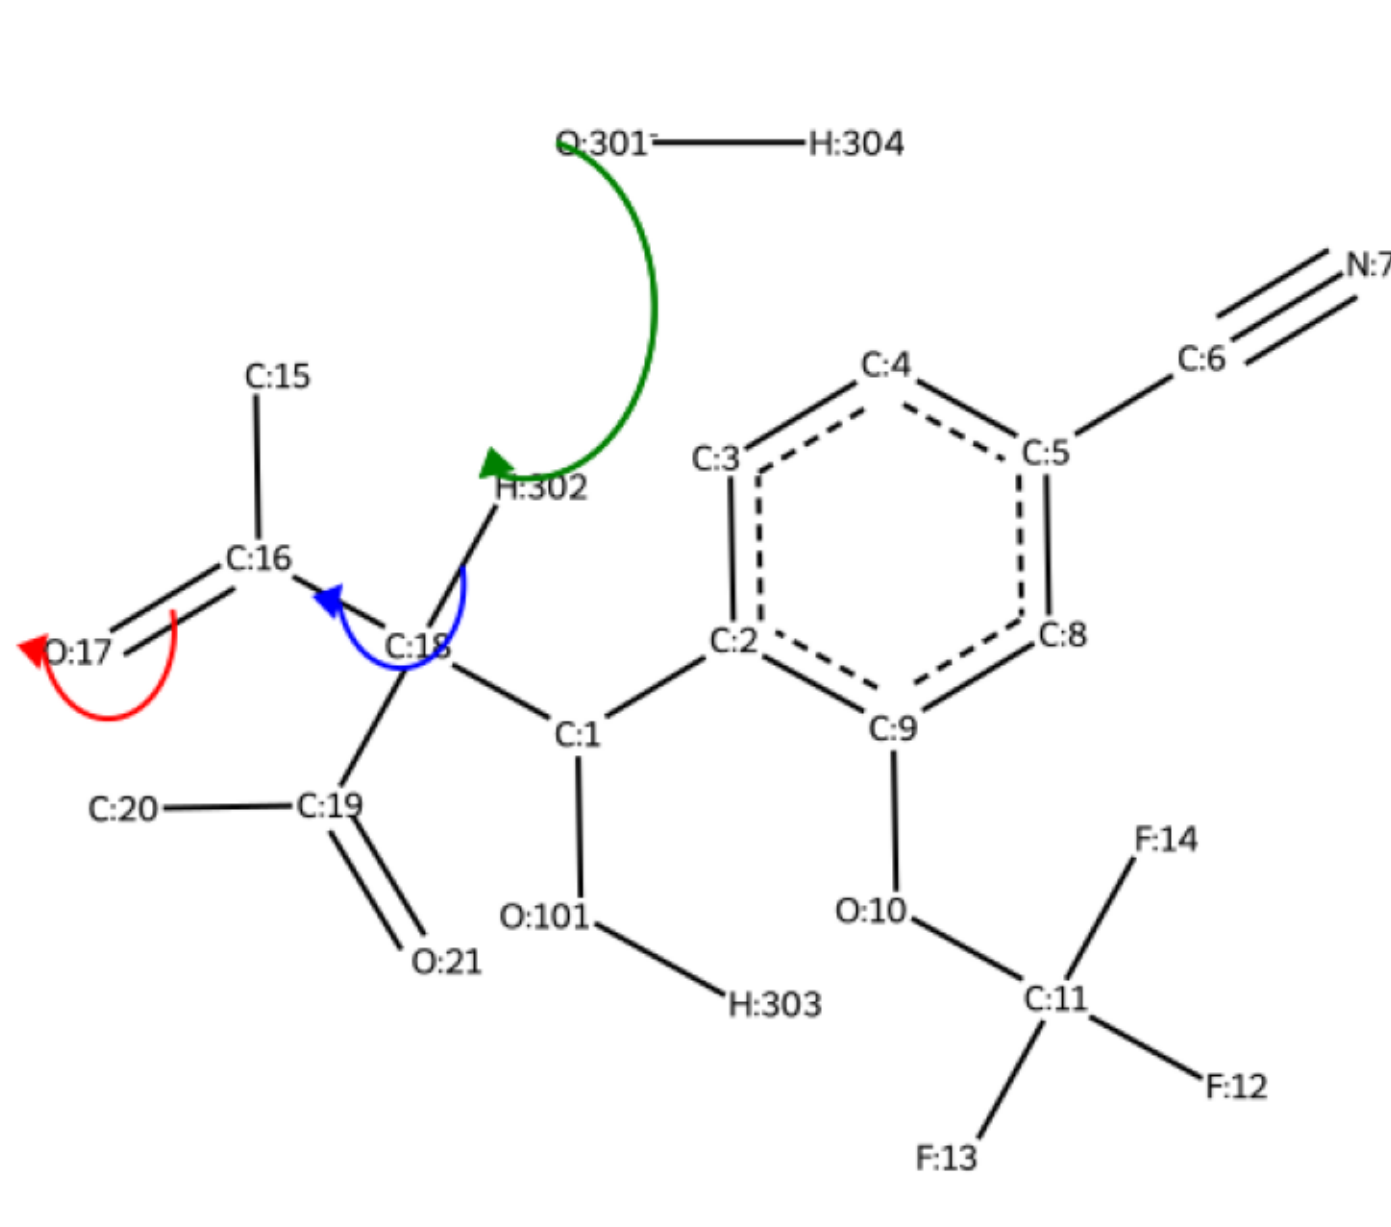

step #5

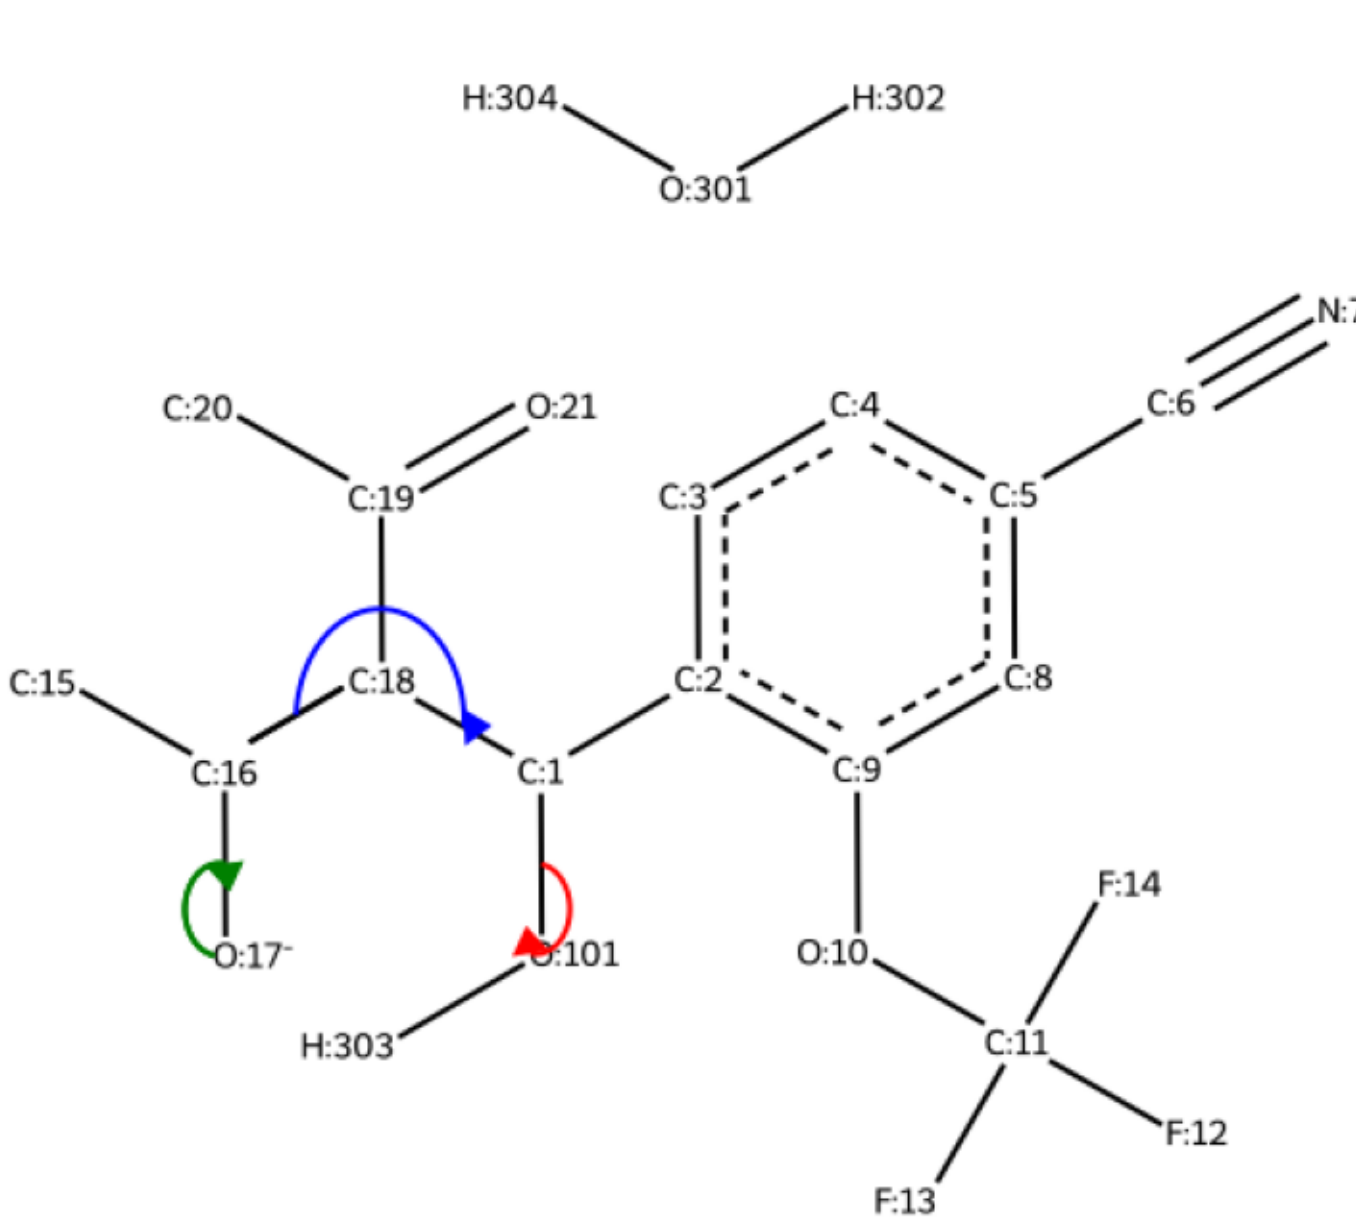

Product(s)

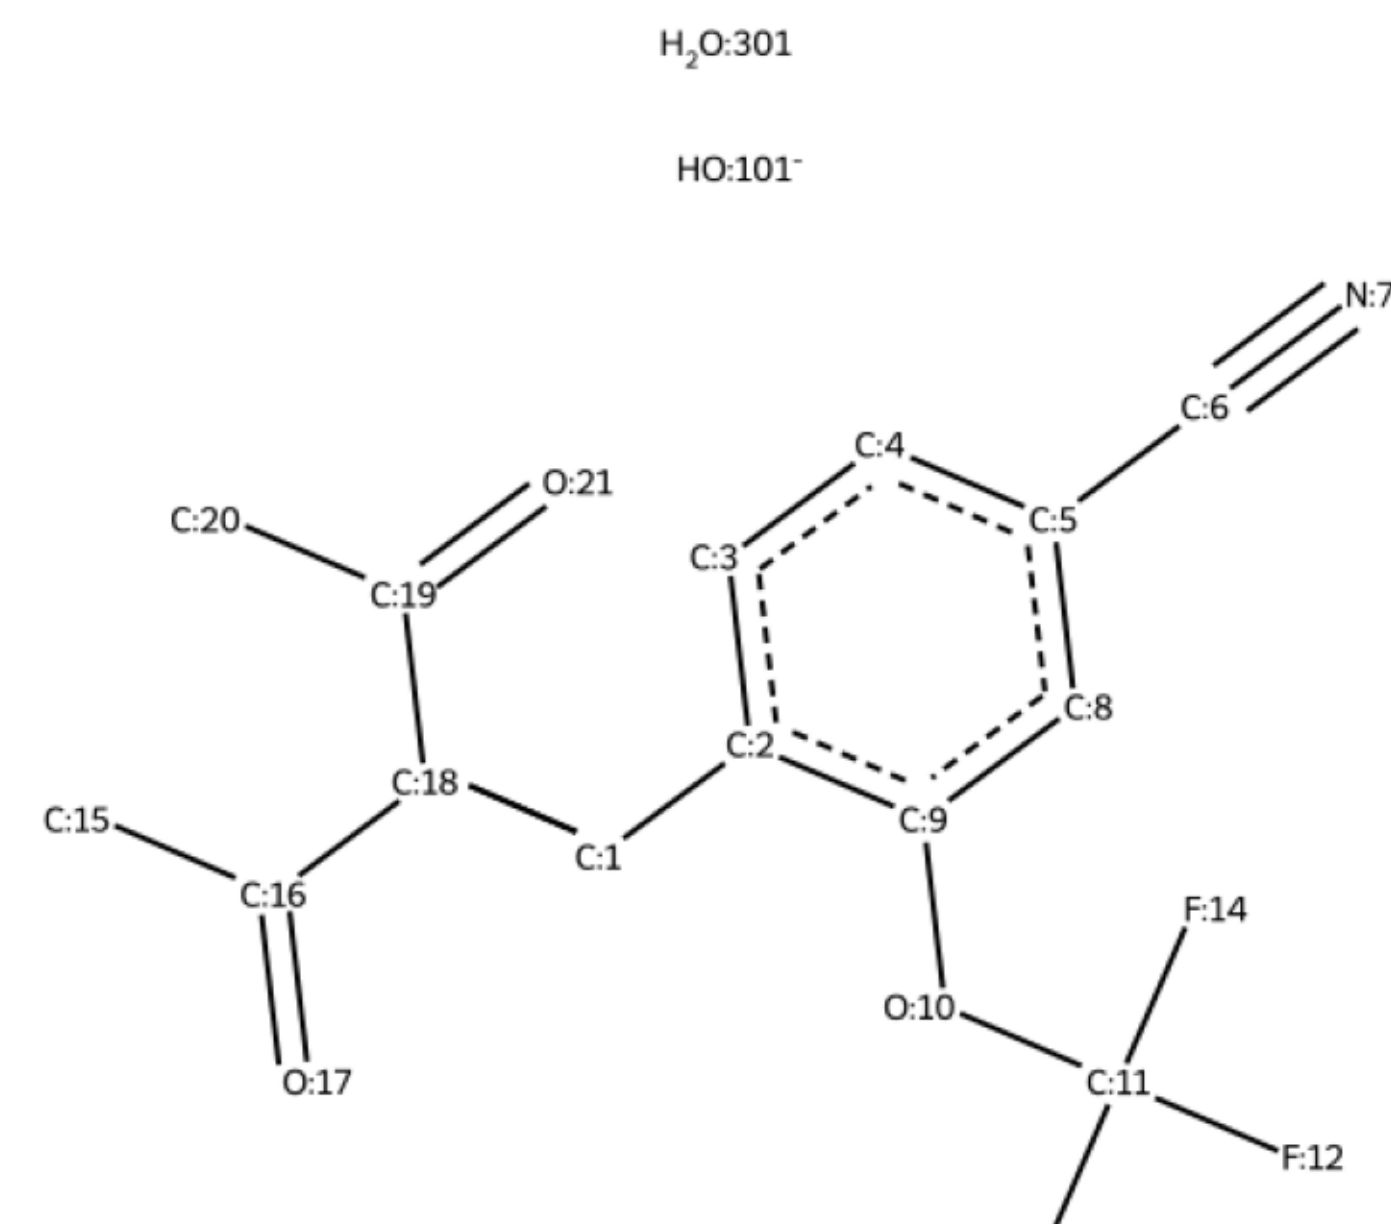



Original reaction  
sampled RXN\_ID:77)

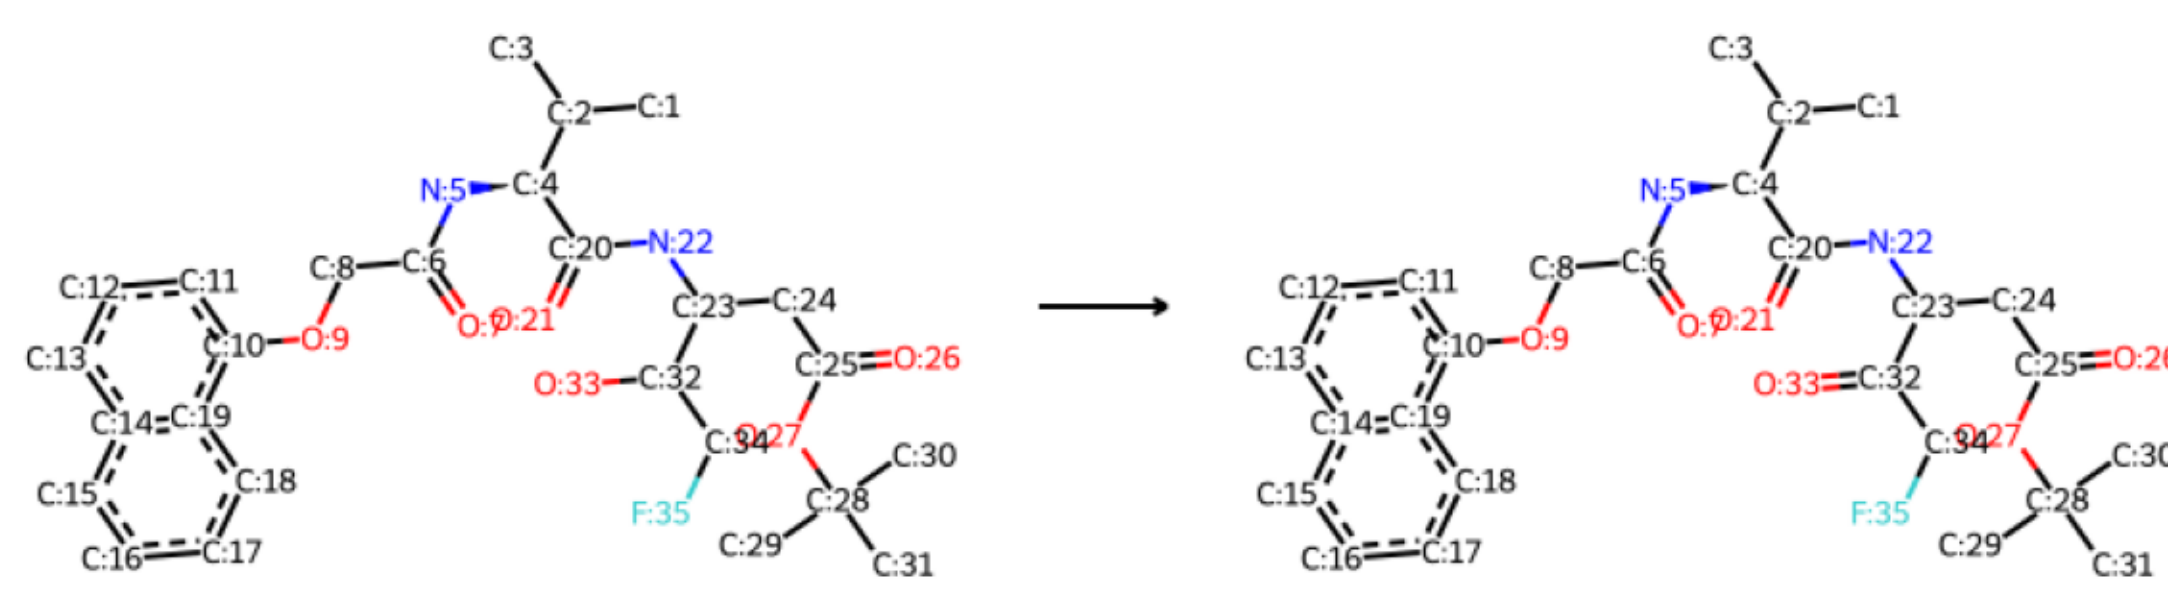

Identified mechanistic class -  
Jones\_oxidation reaction

Reaction with missing reagents recovered

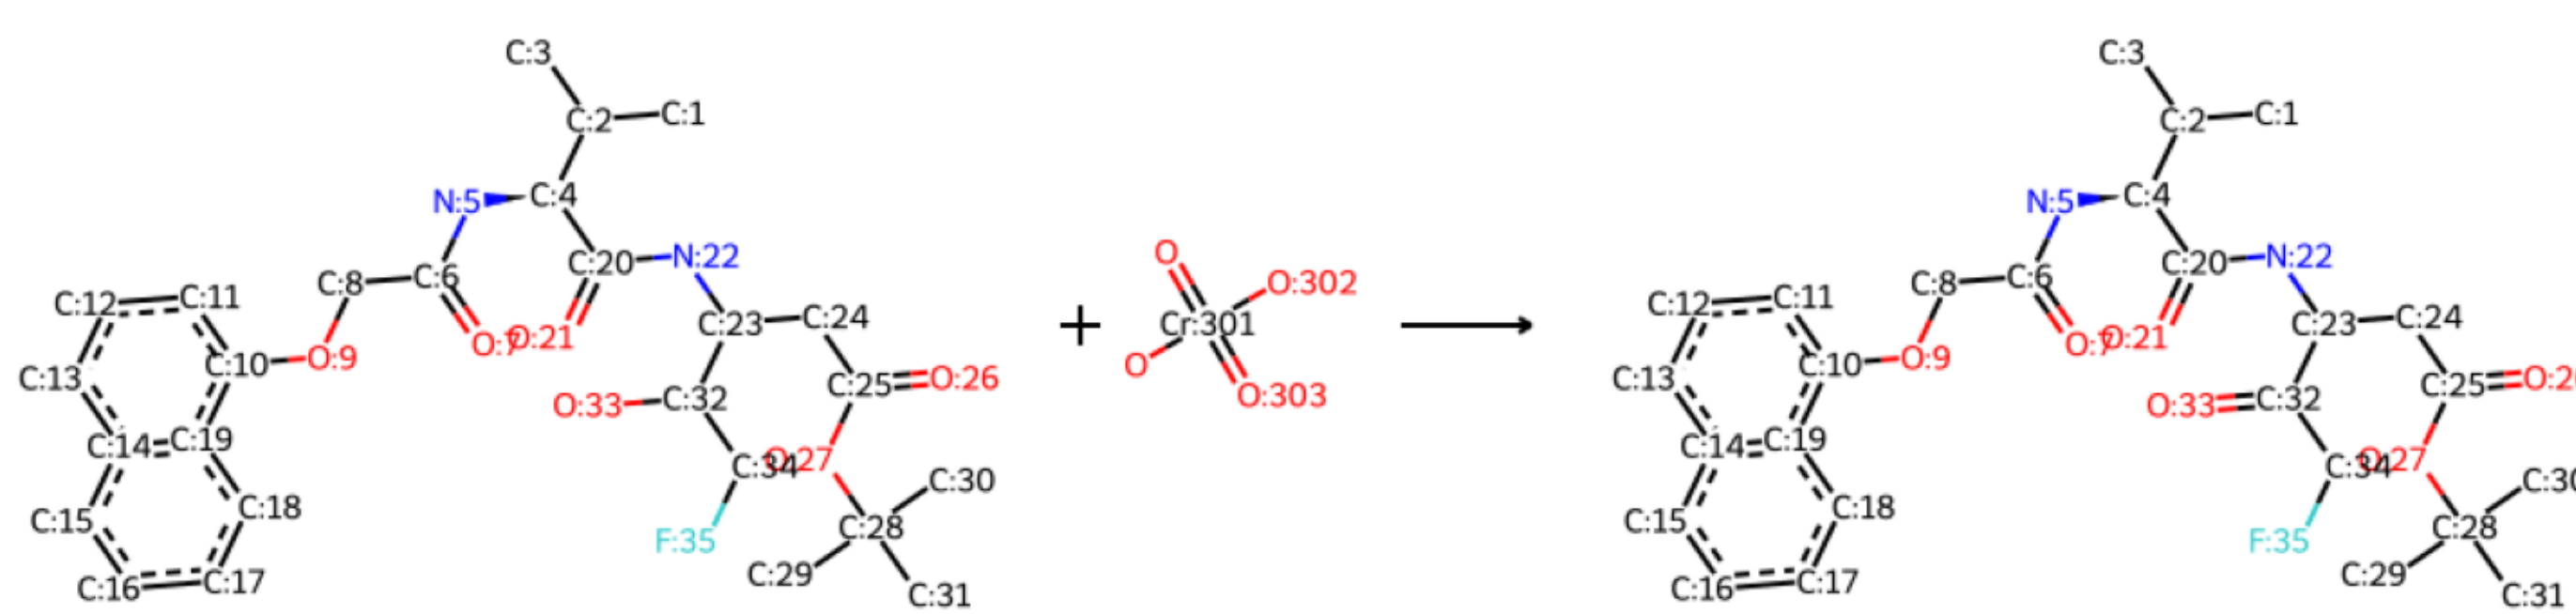

Proposed mechanistic pathway

[Arrow order: (1) green, (2) blue, (3) red, (4) orange]

step #1

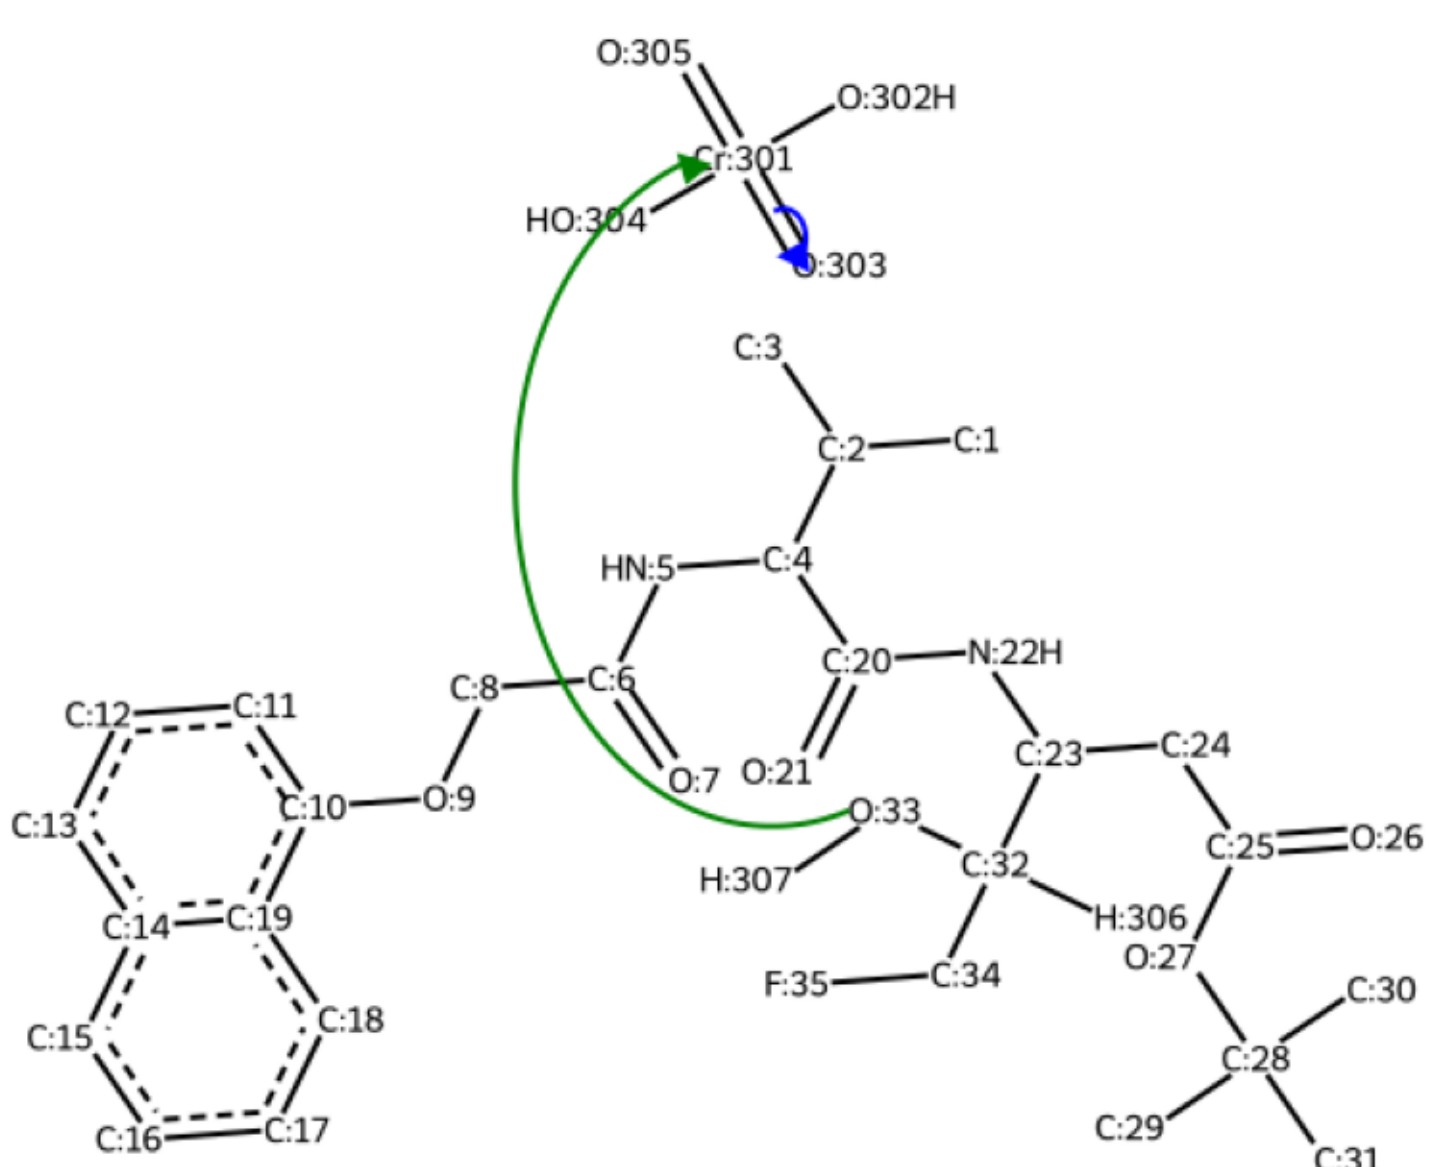

step #2

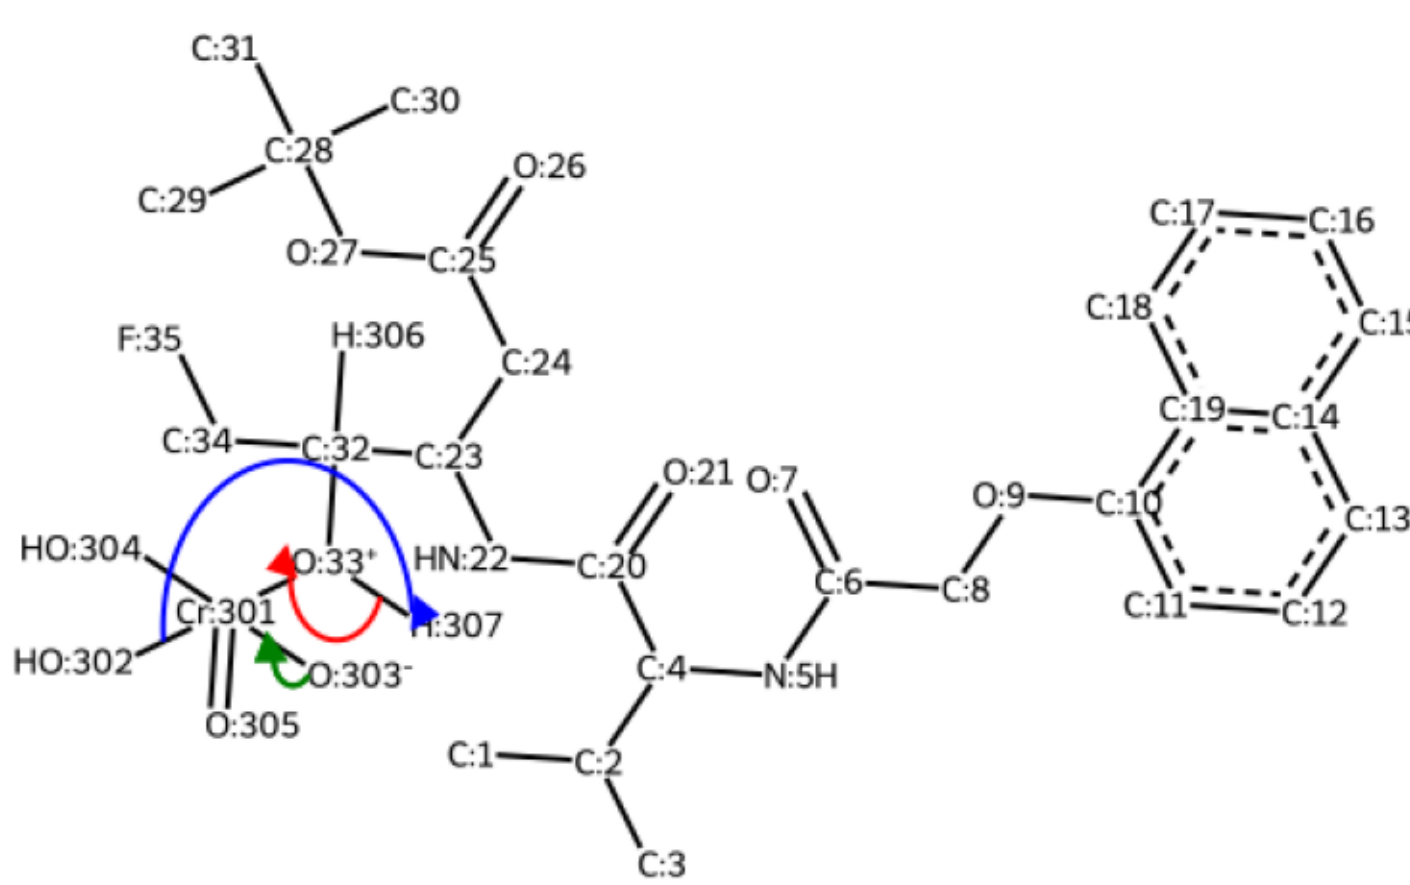

step #3

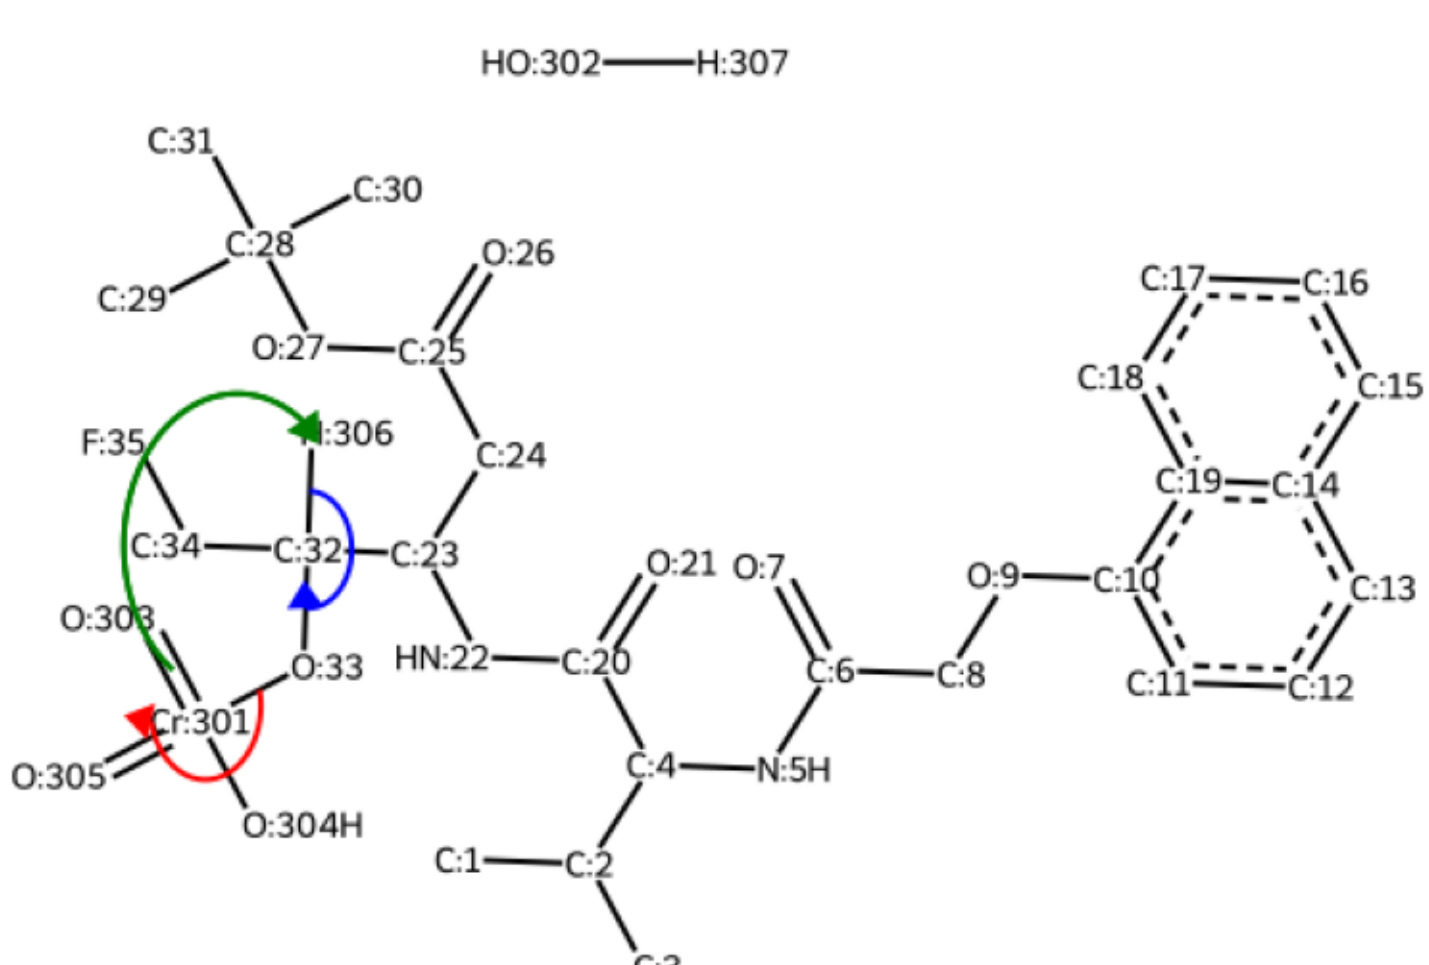

Product(s)

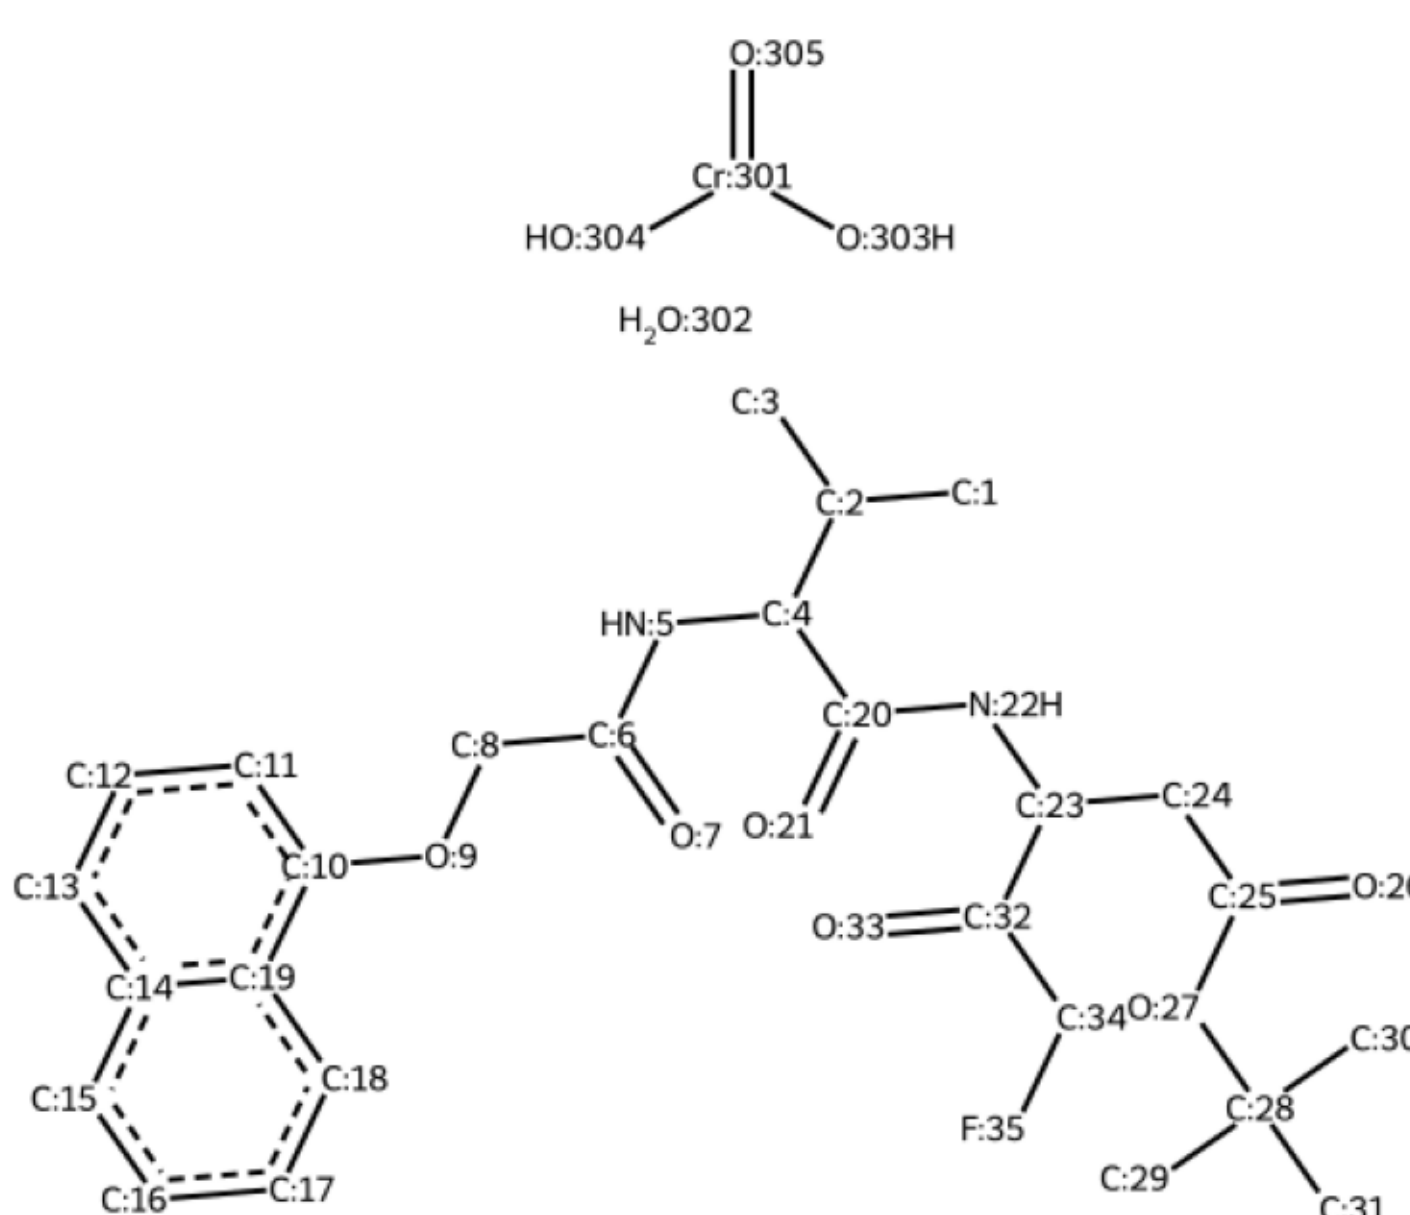



# Original reaction sampled RXN\_ID:78)

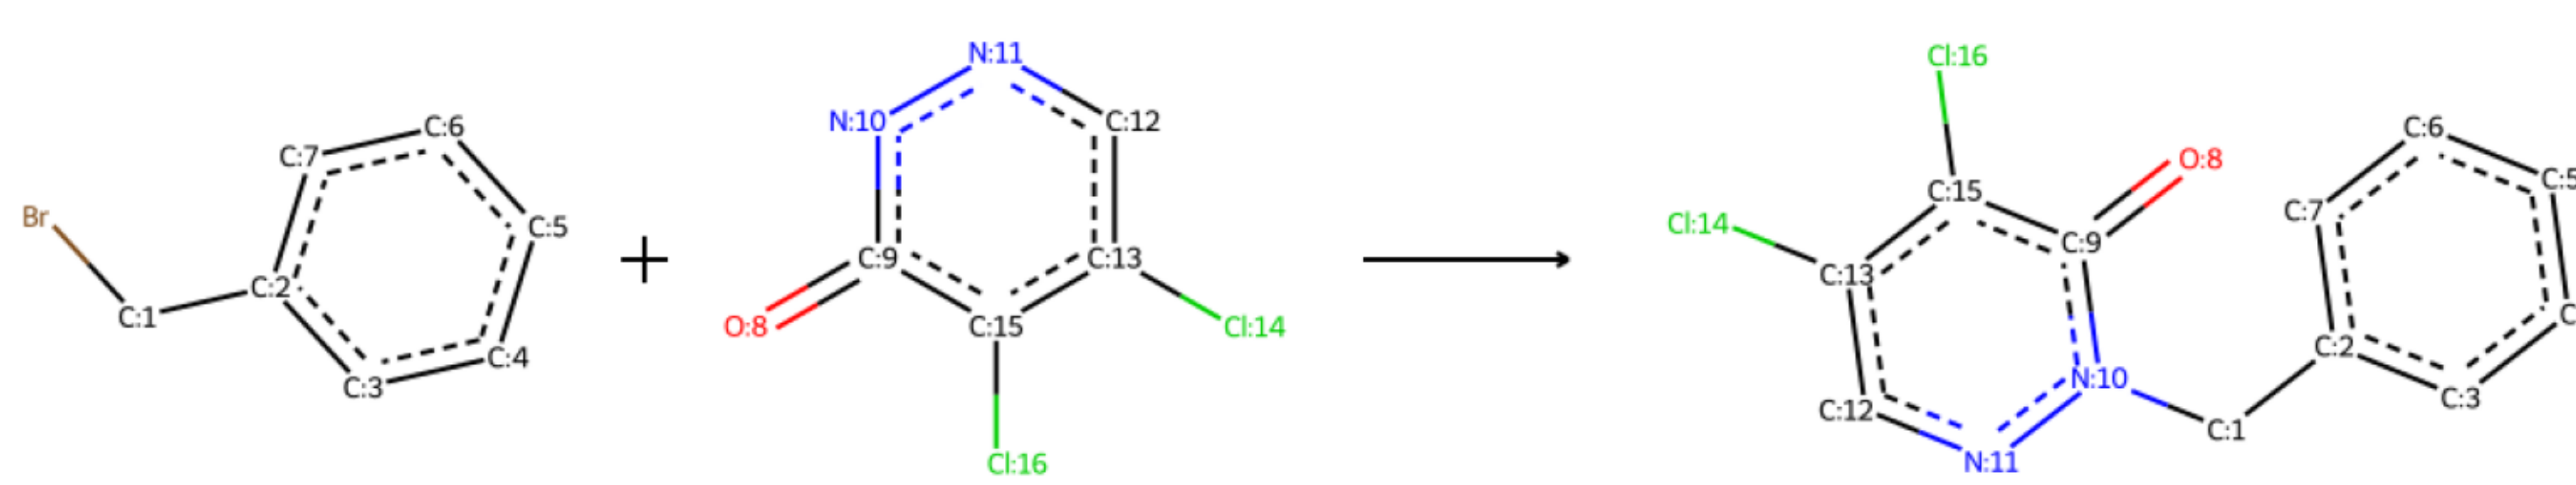

Identified mechanistic class -  
SN2 reaction

## Reaction with missing reagents recovered

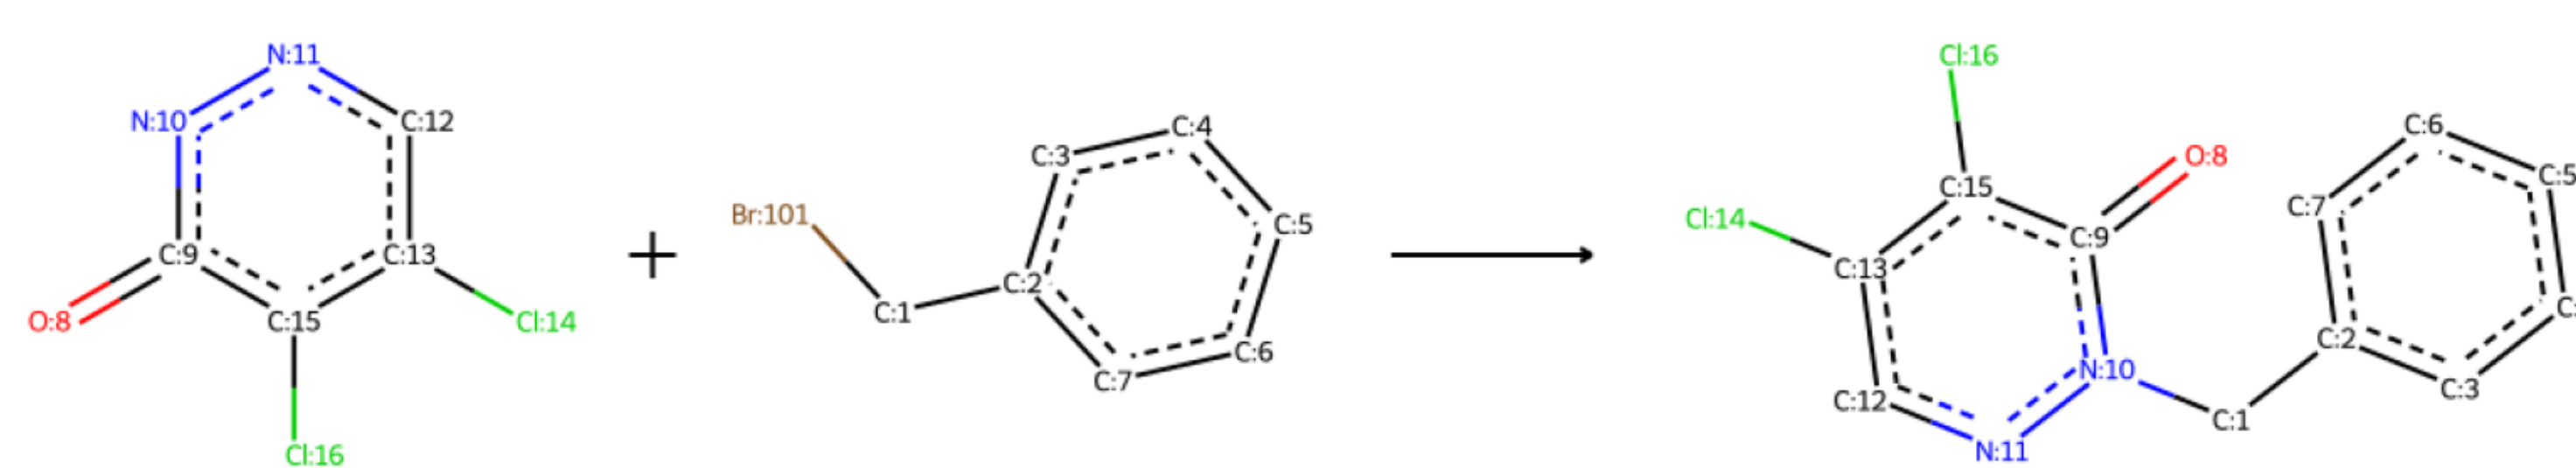

## Proposed mechanistic pathway

[Arrow order: (1) green, (2) blue, (3) red, (4) orange]

step #1

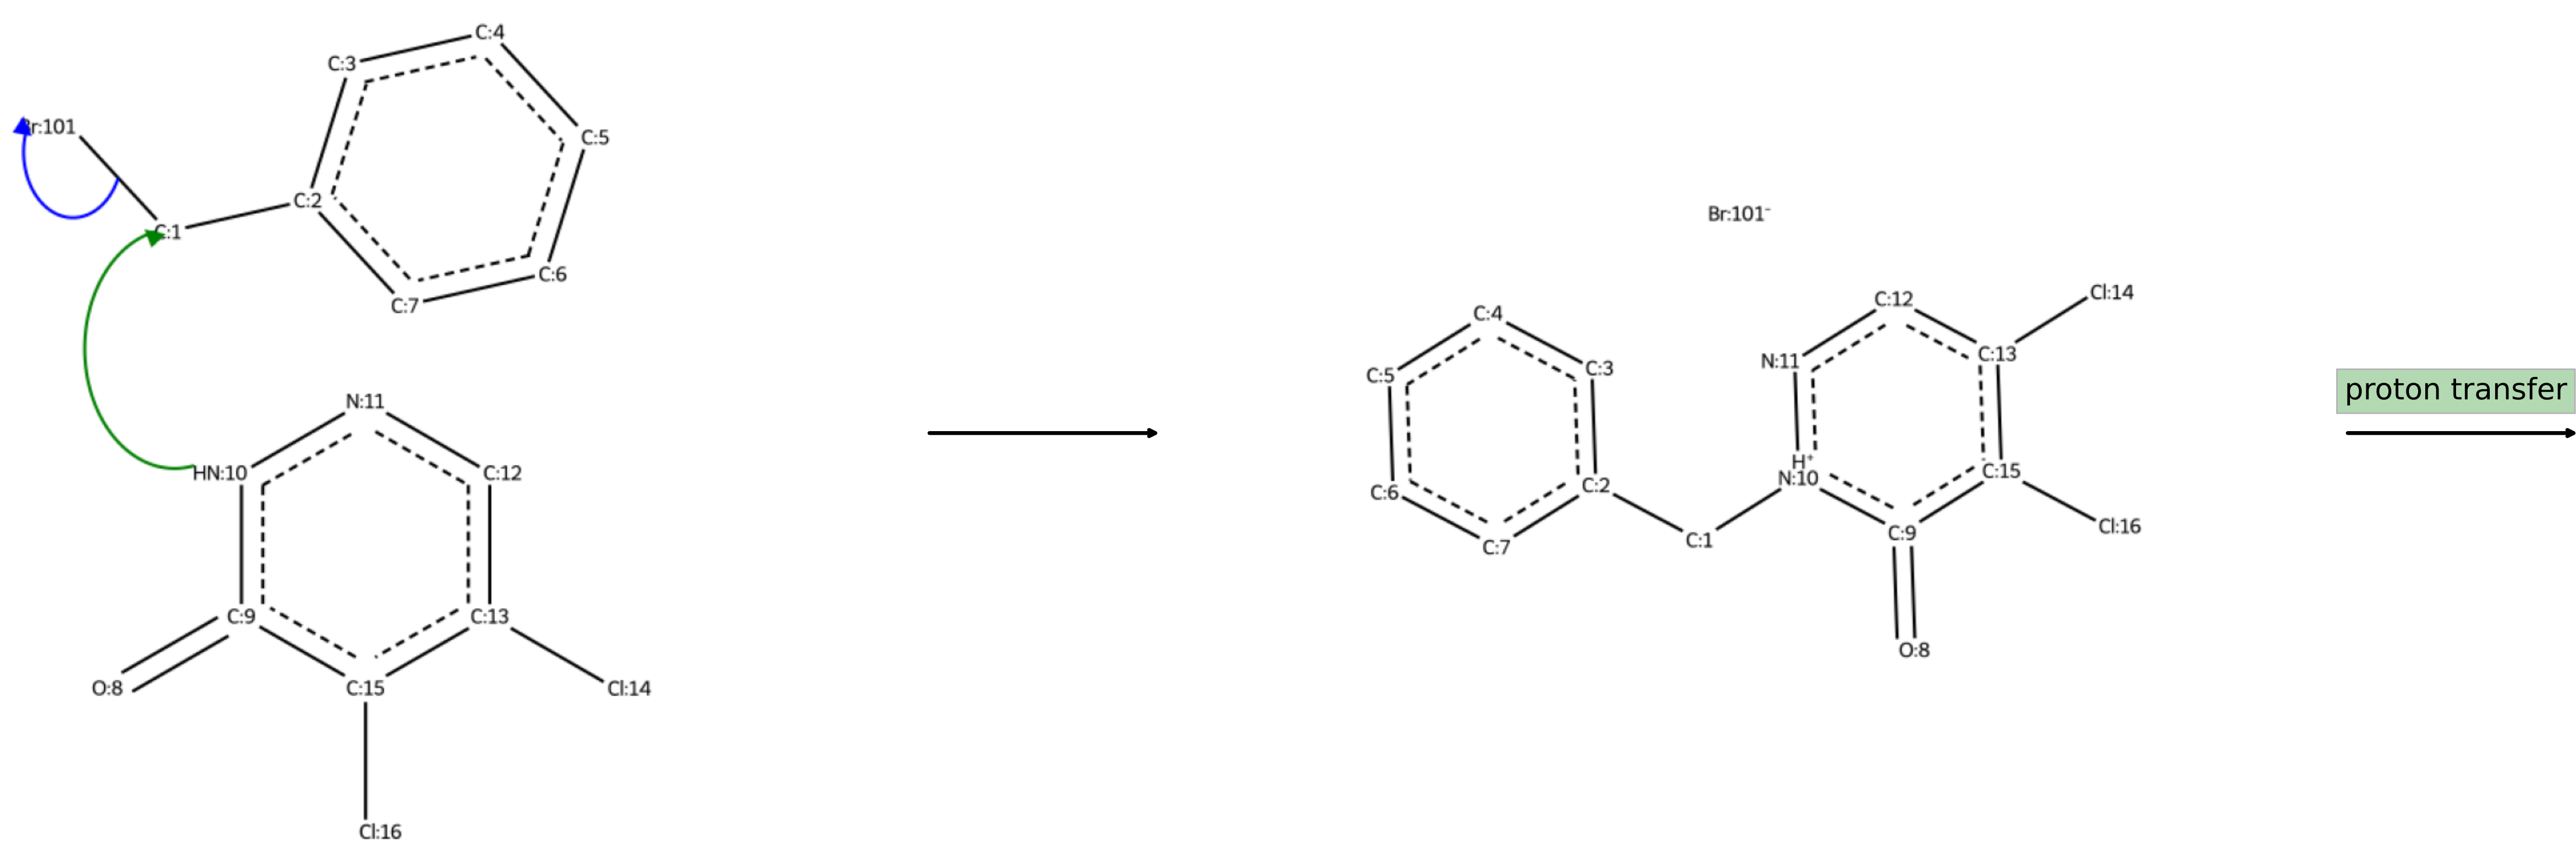

Product(s)

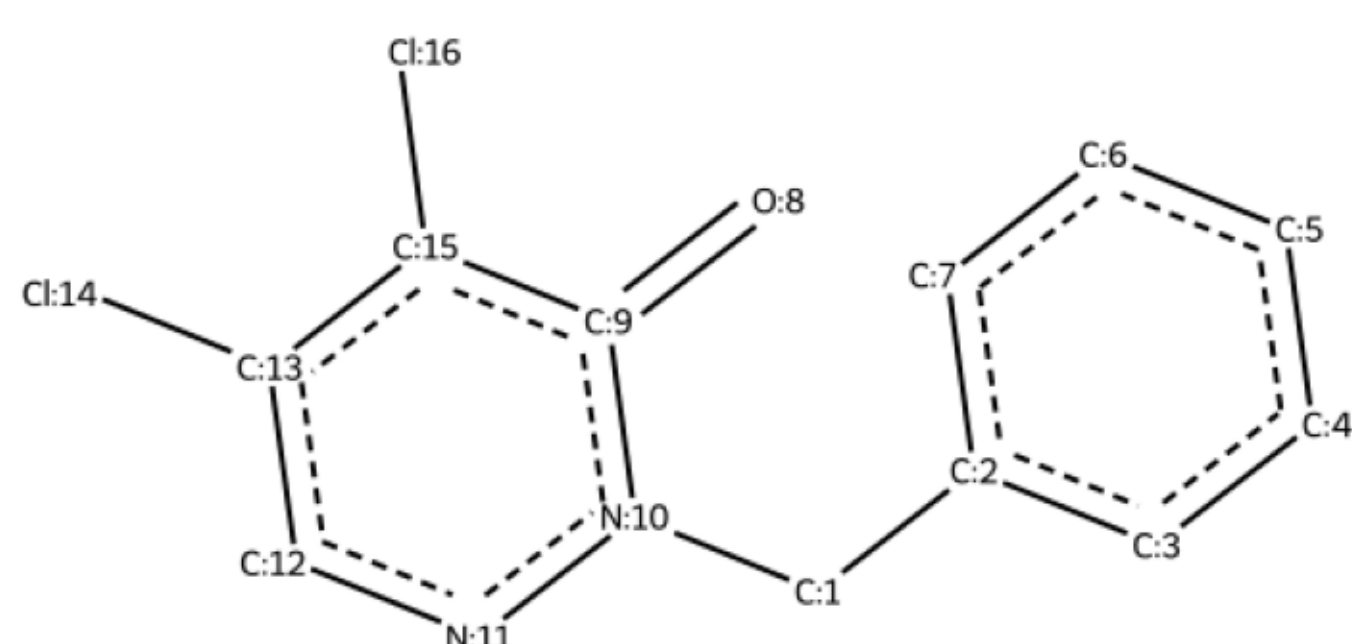

# Original reaction sampled RXN\_ID:79)

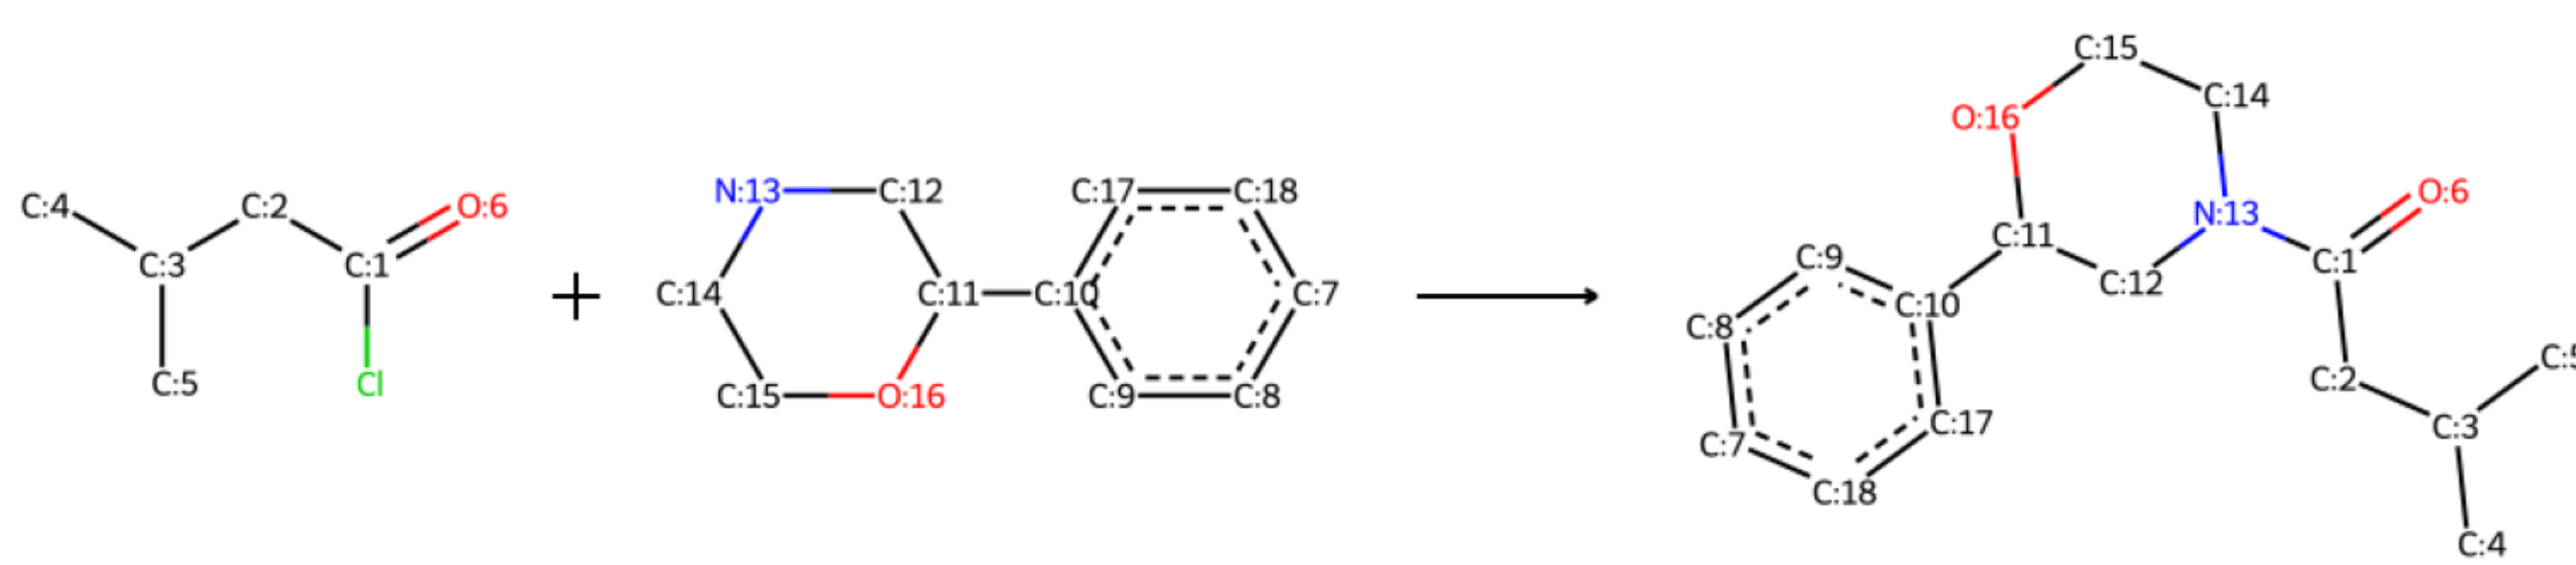

Identified mechanistic class -  
nucleophilic\_attack\_to\_(thio)carbonyl\_or\_sulfonyl reaction

## Reaction with missing reagents recovered

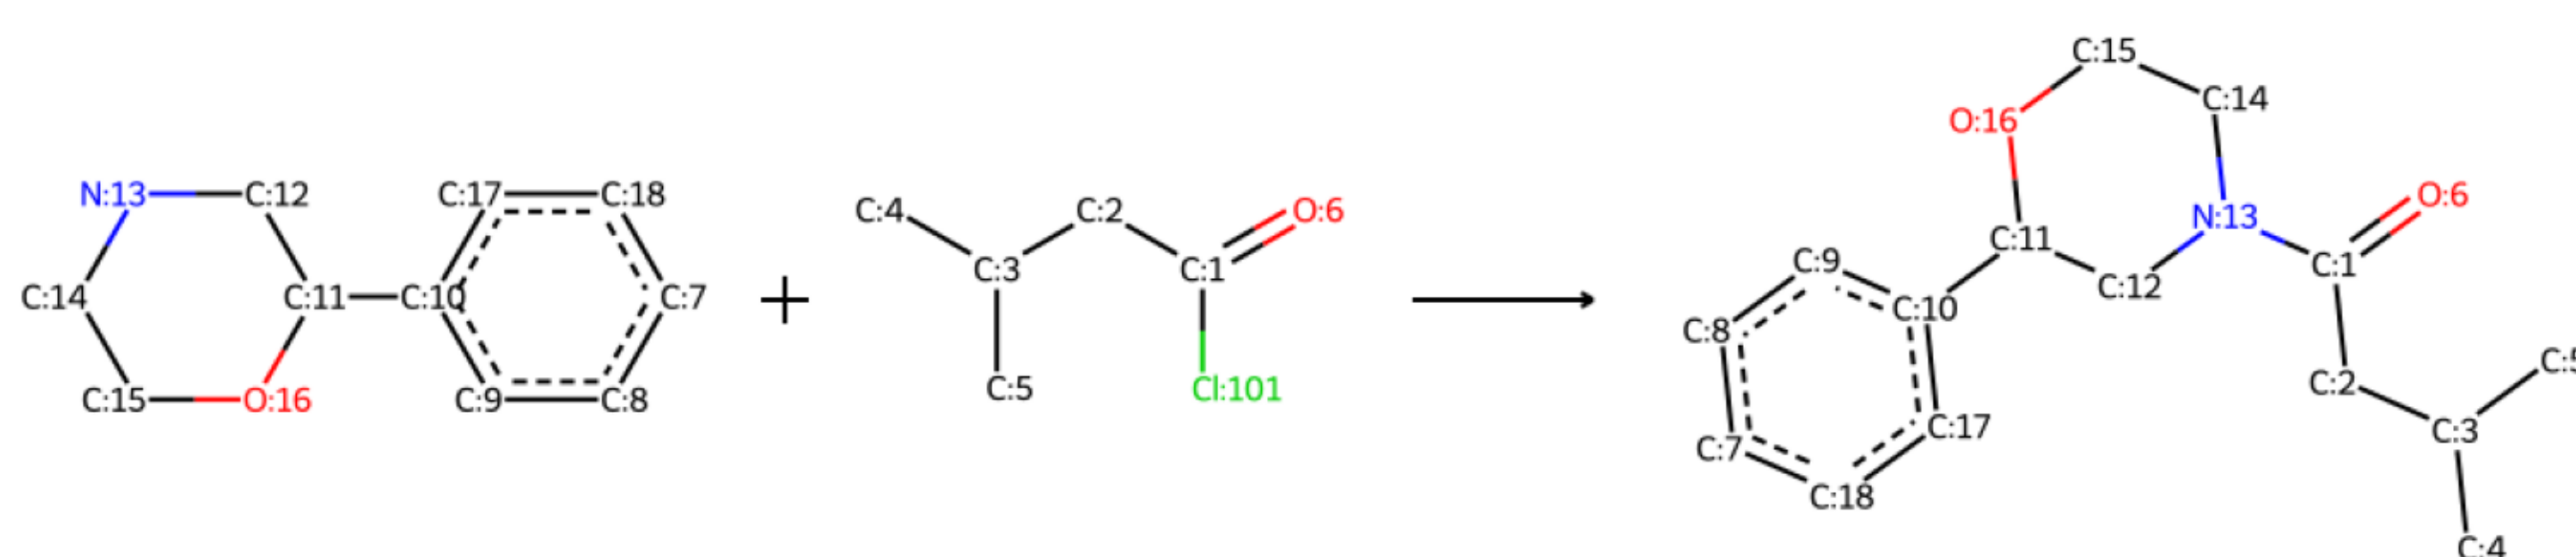

## Proposed mechanistic pathway

[Arrow order: (1) green, (2) blue, (3) red, (4) orange]

step #1

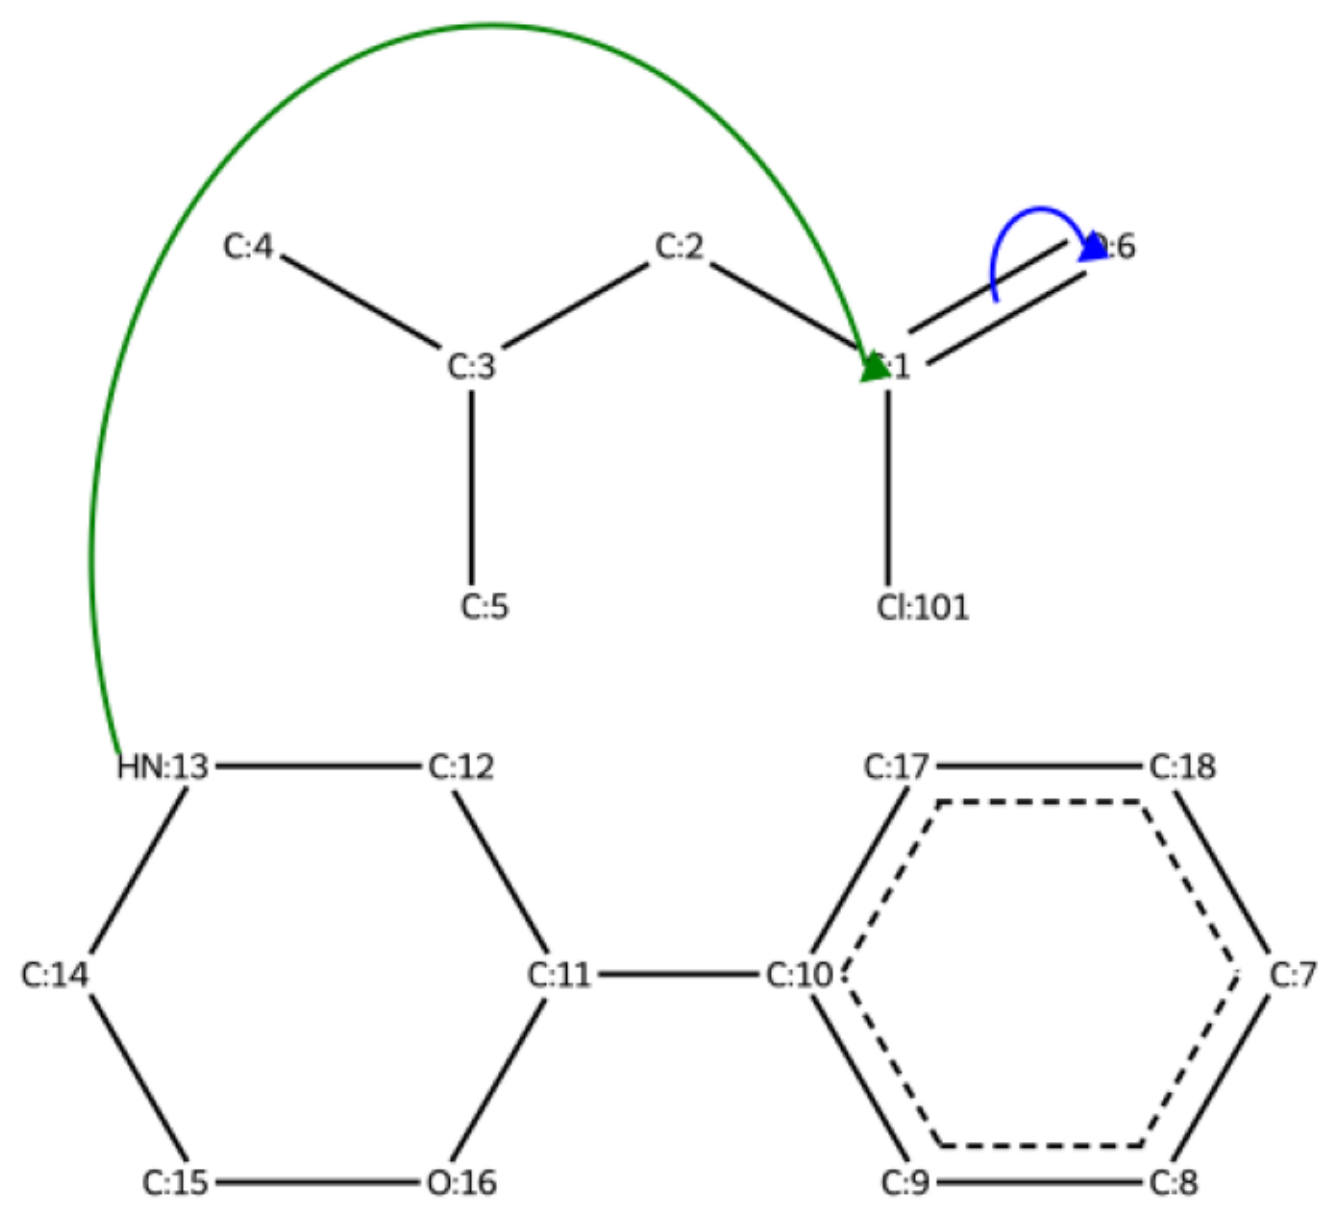

step #2

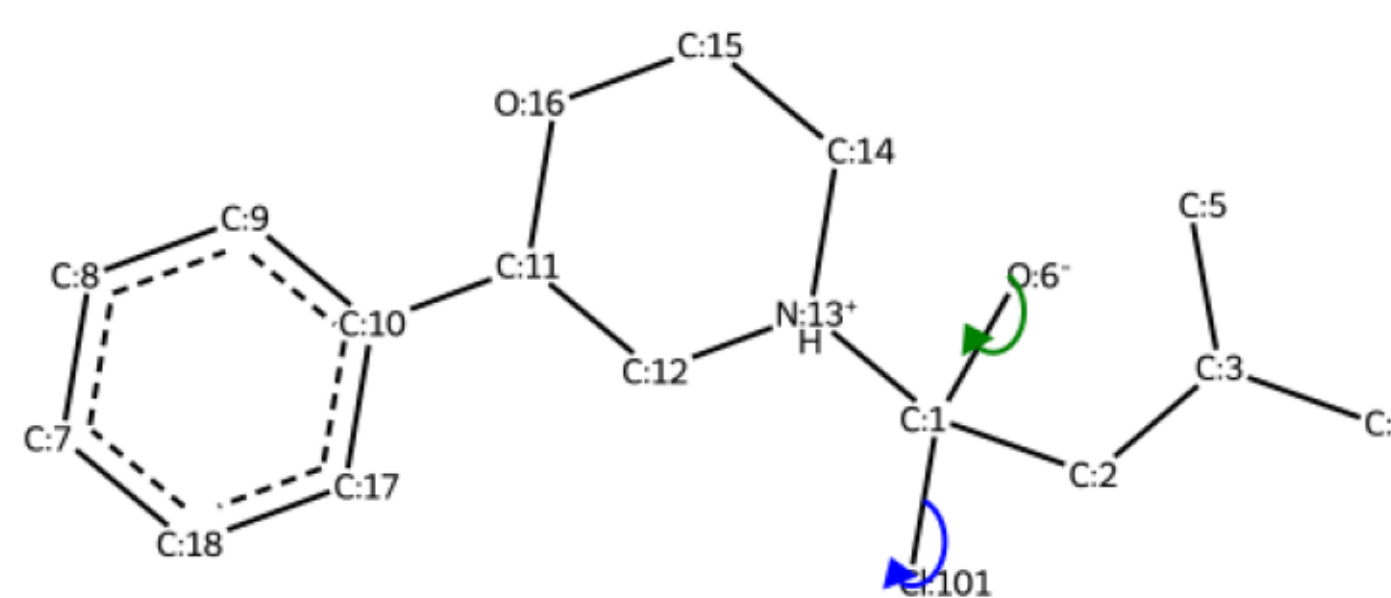

Product(s)

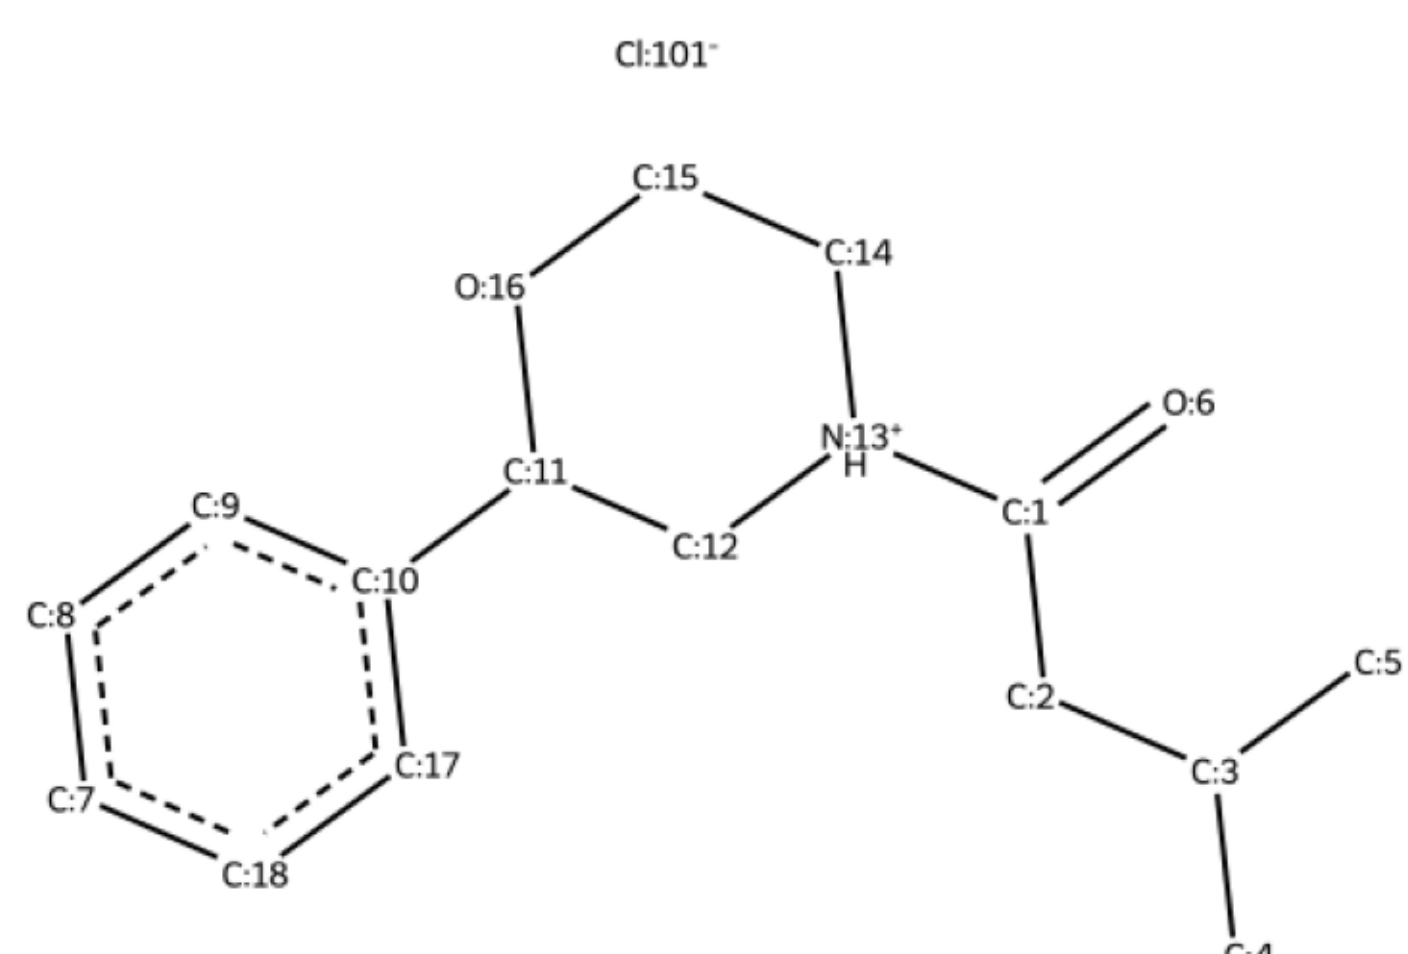

proton transfer

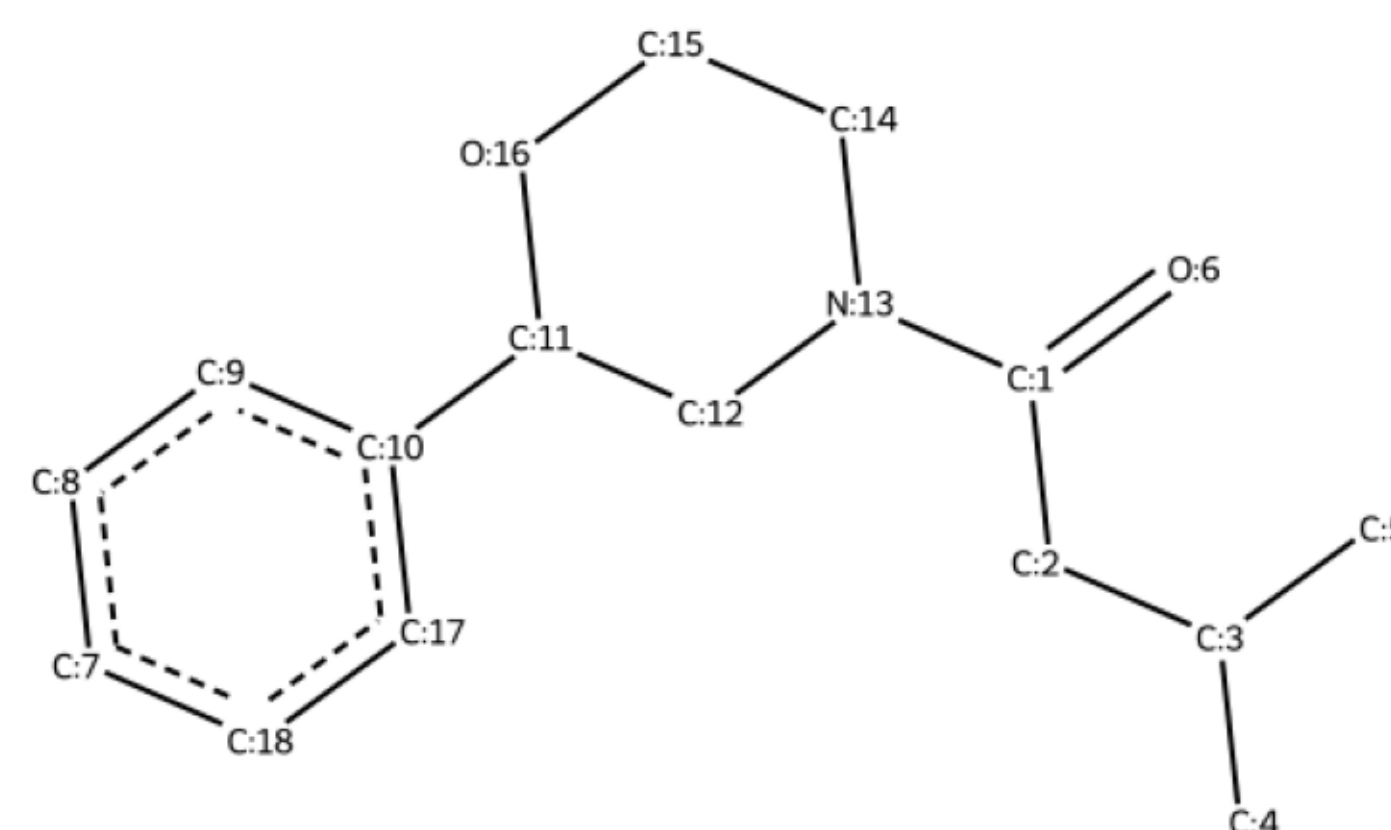



Original reaction  
sampled RXN\_ID:80)

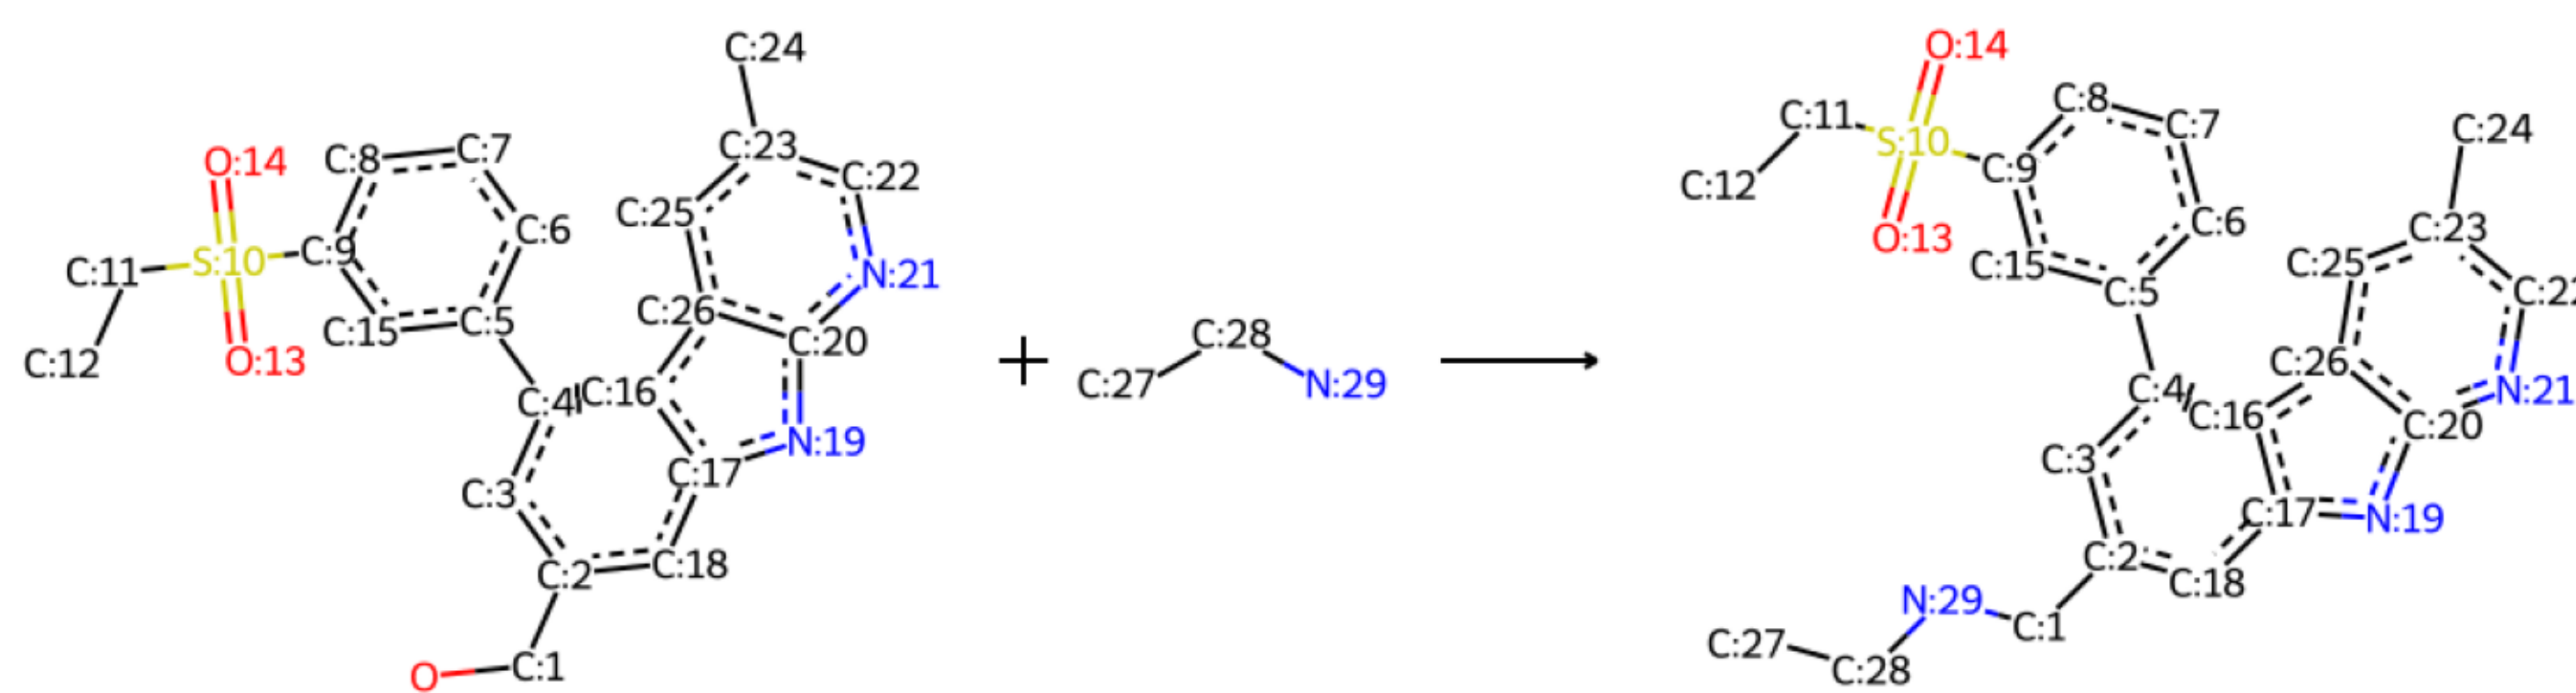

Identified mechanistic class -  
SN<sub>2</sub>\_with\_tosylate reaction

Reaction with missing reagents recovered

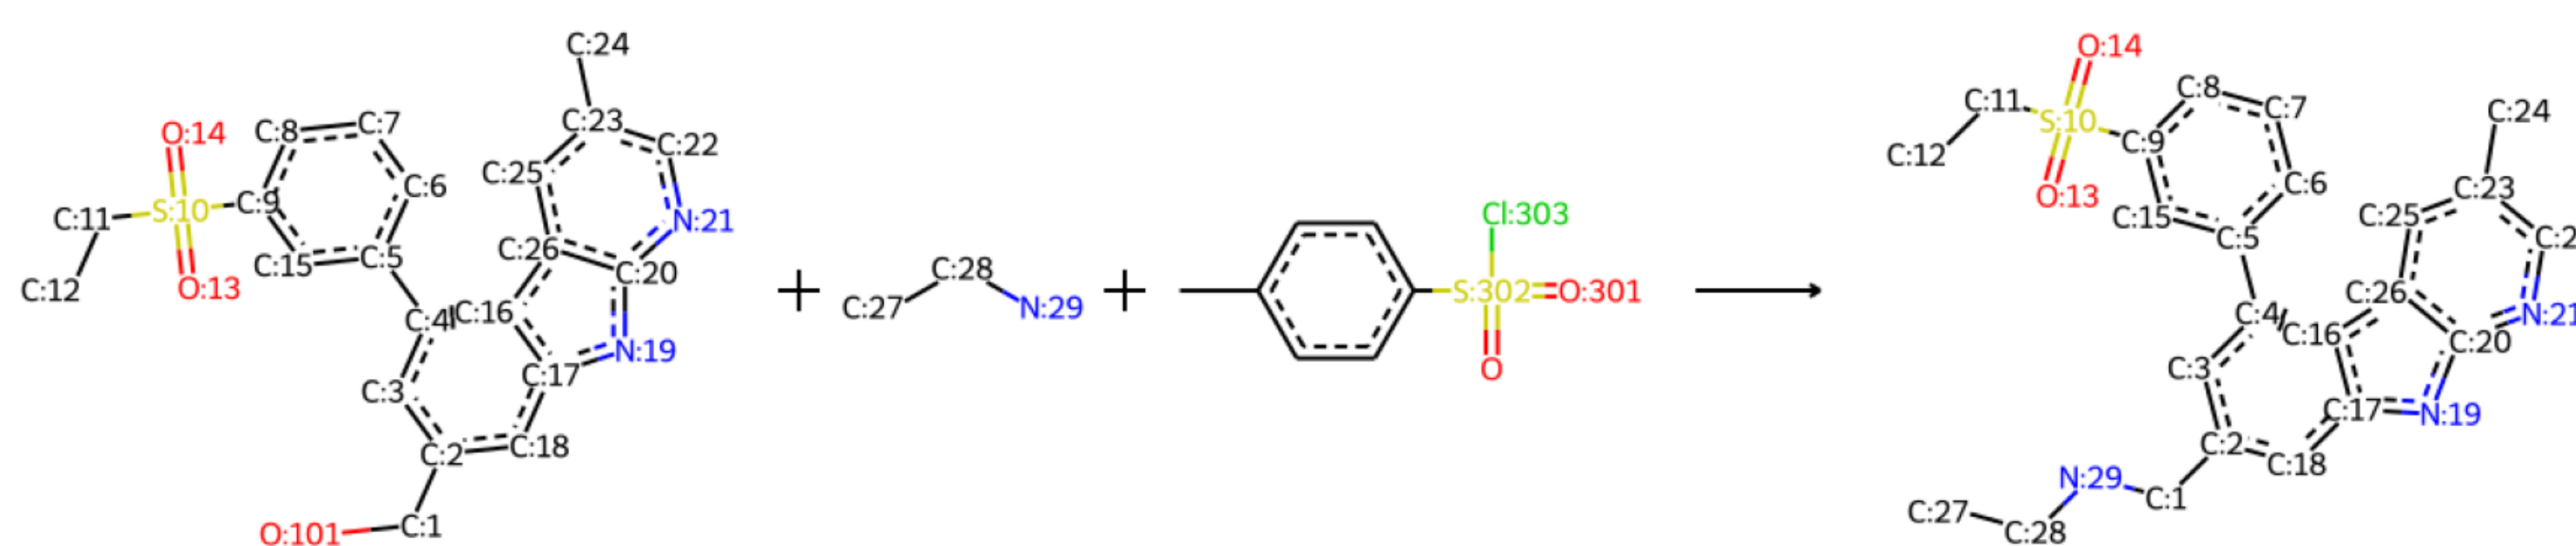

Proposed mechanistic pathway

[Arrow order: (1) green, (2) blue, (3) red, (4) orange]

step #1

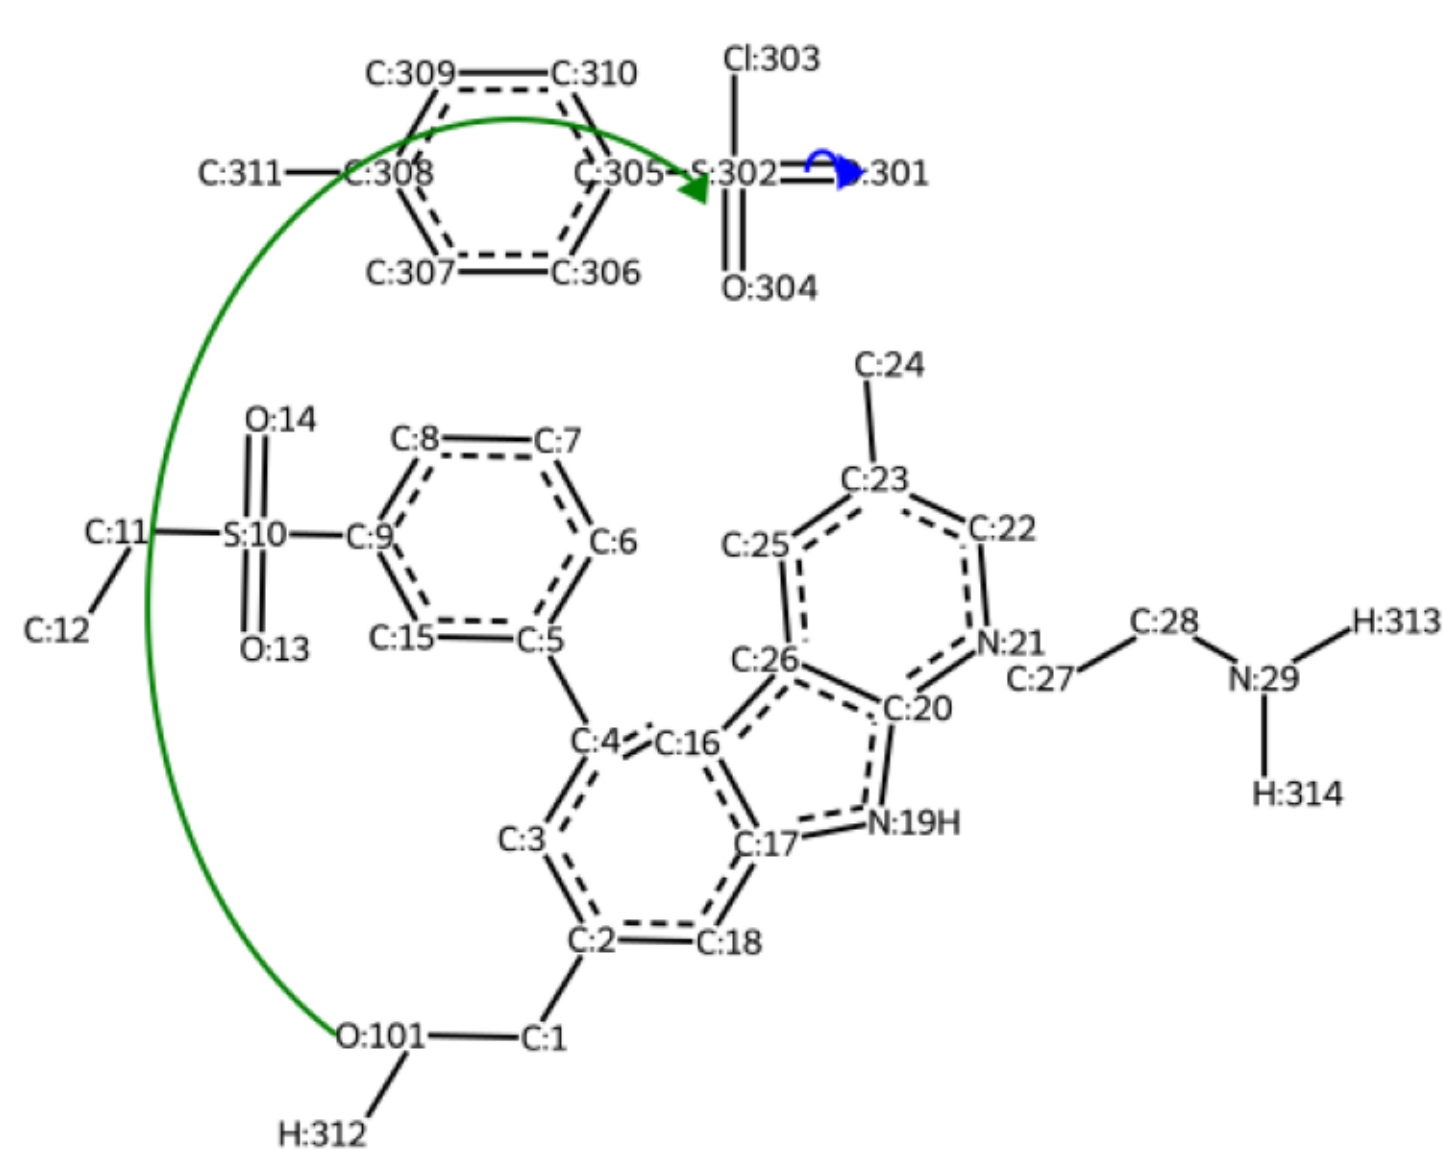

step #2

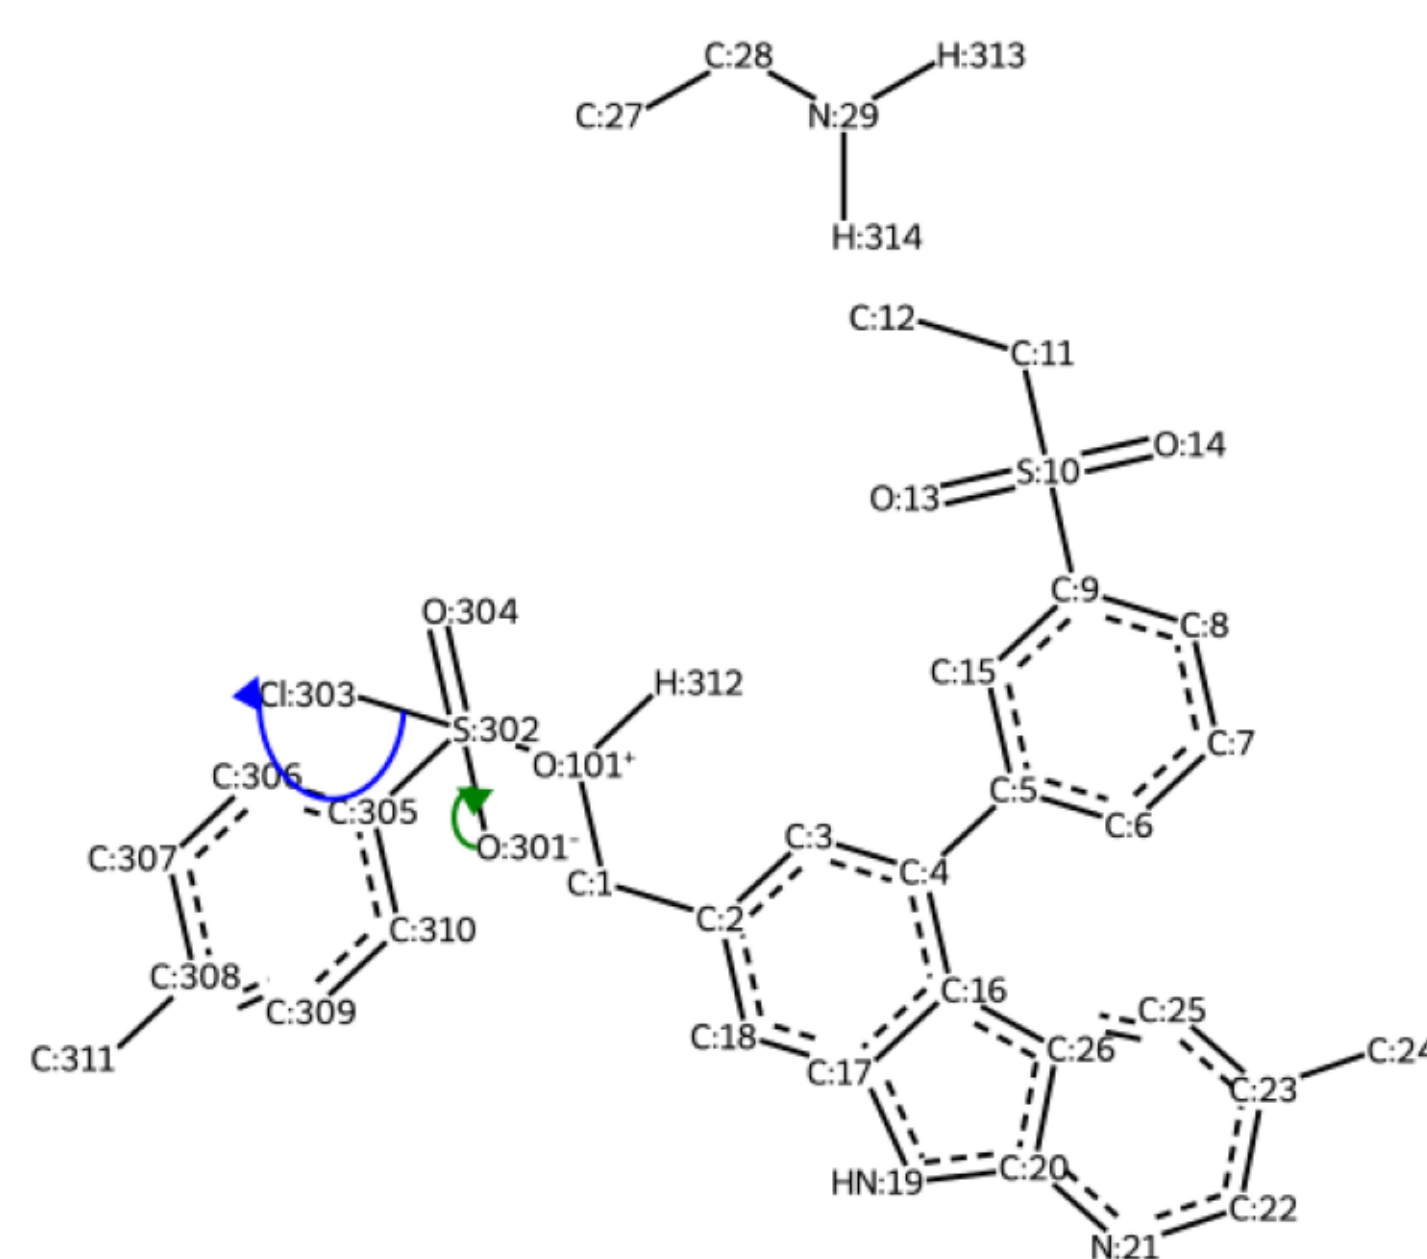

step #3

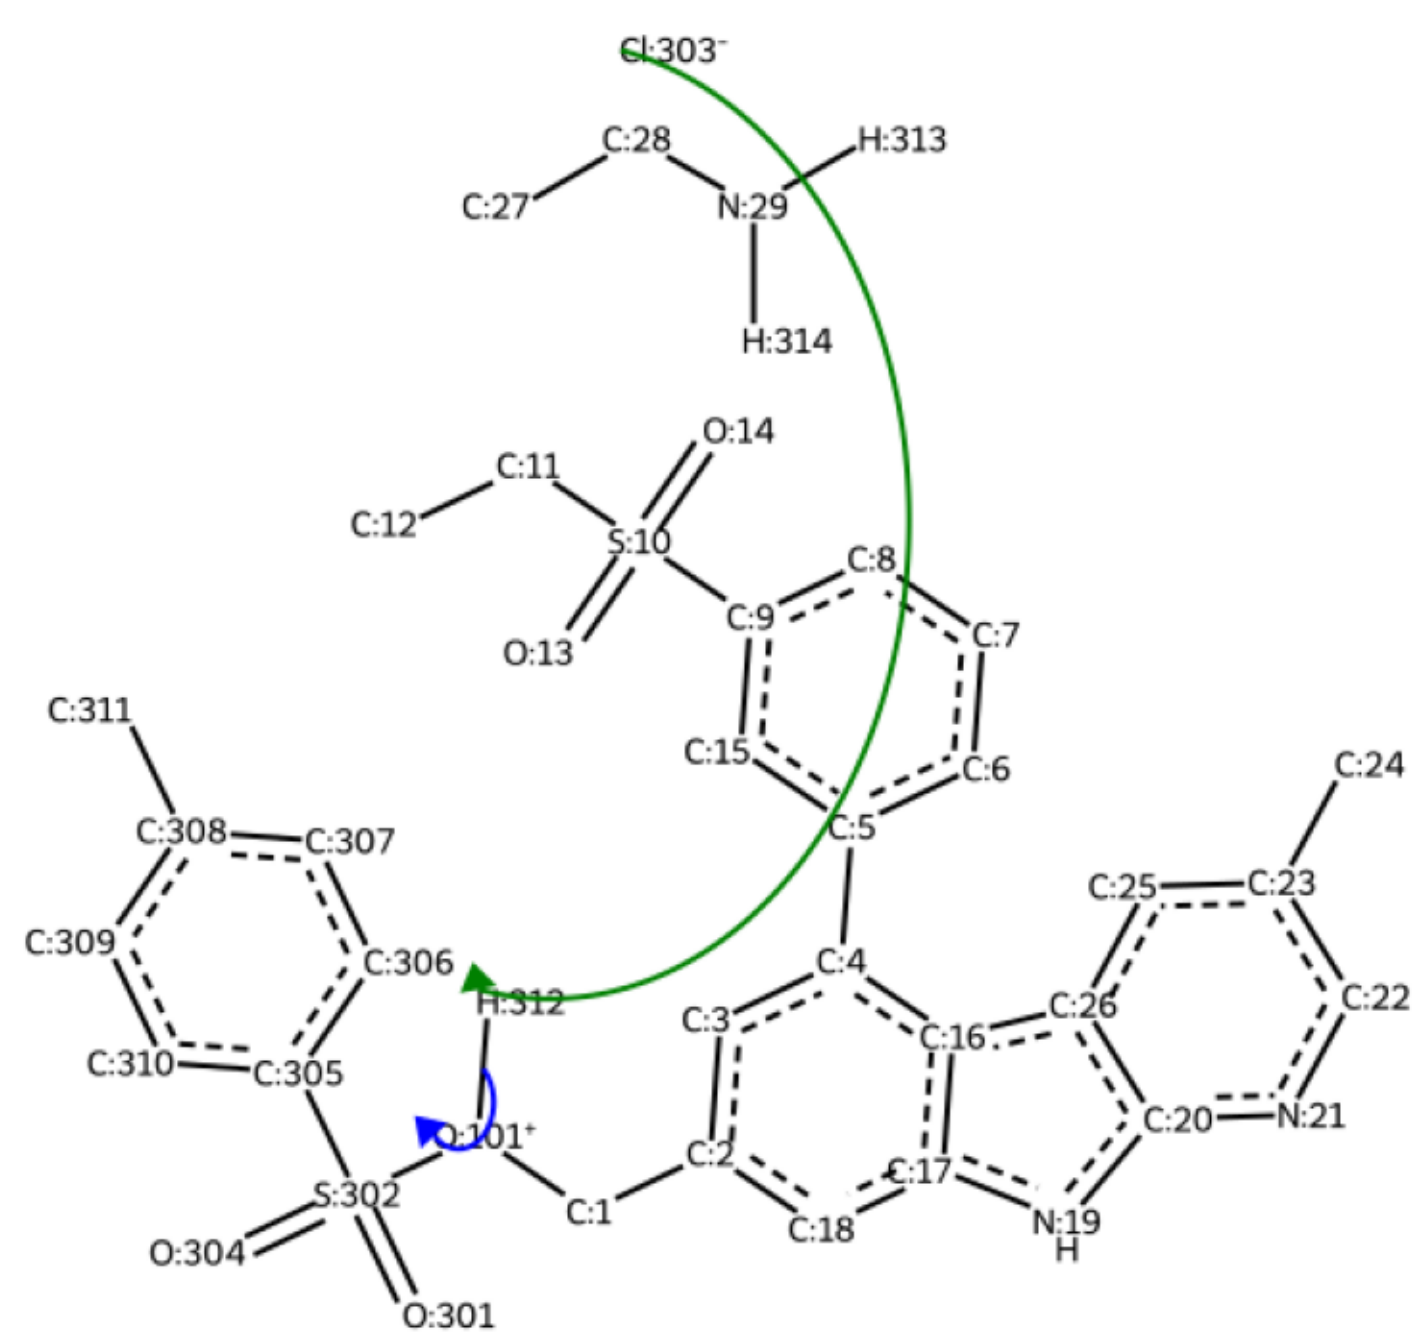

step #4

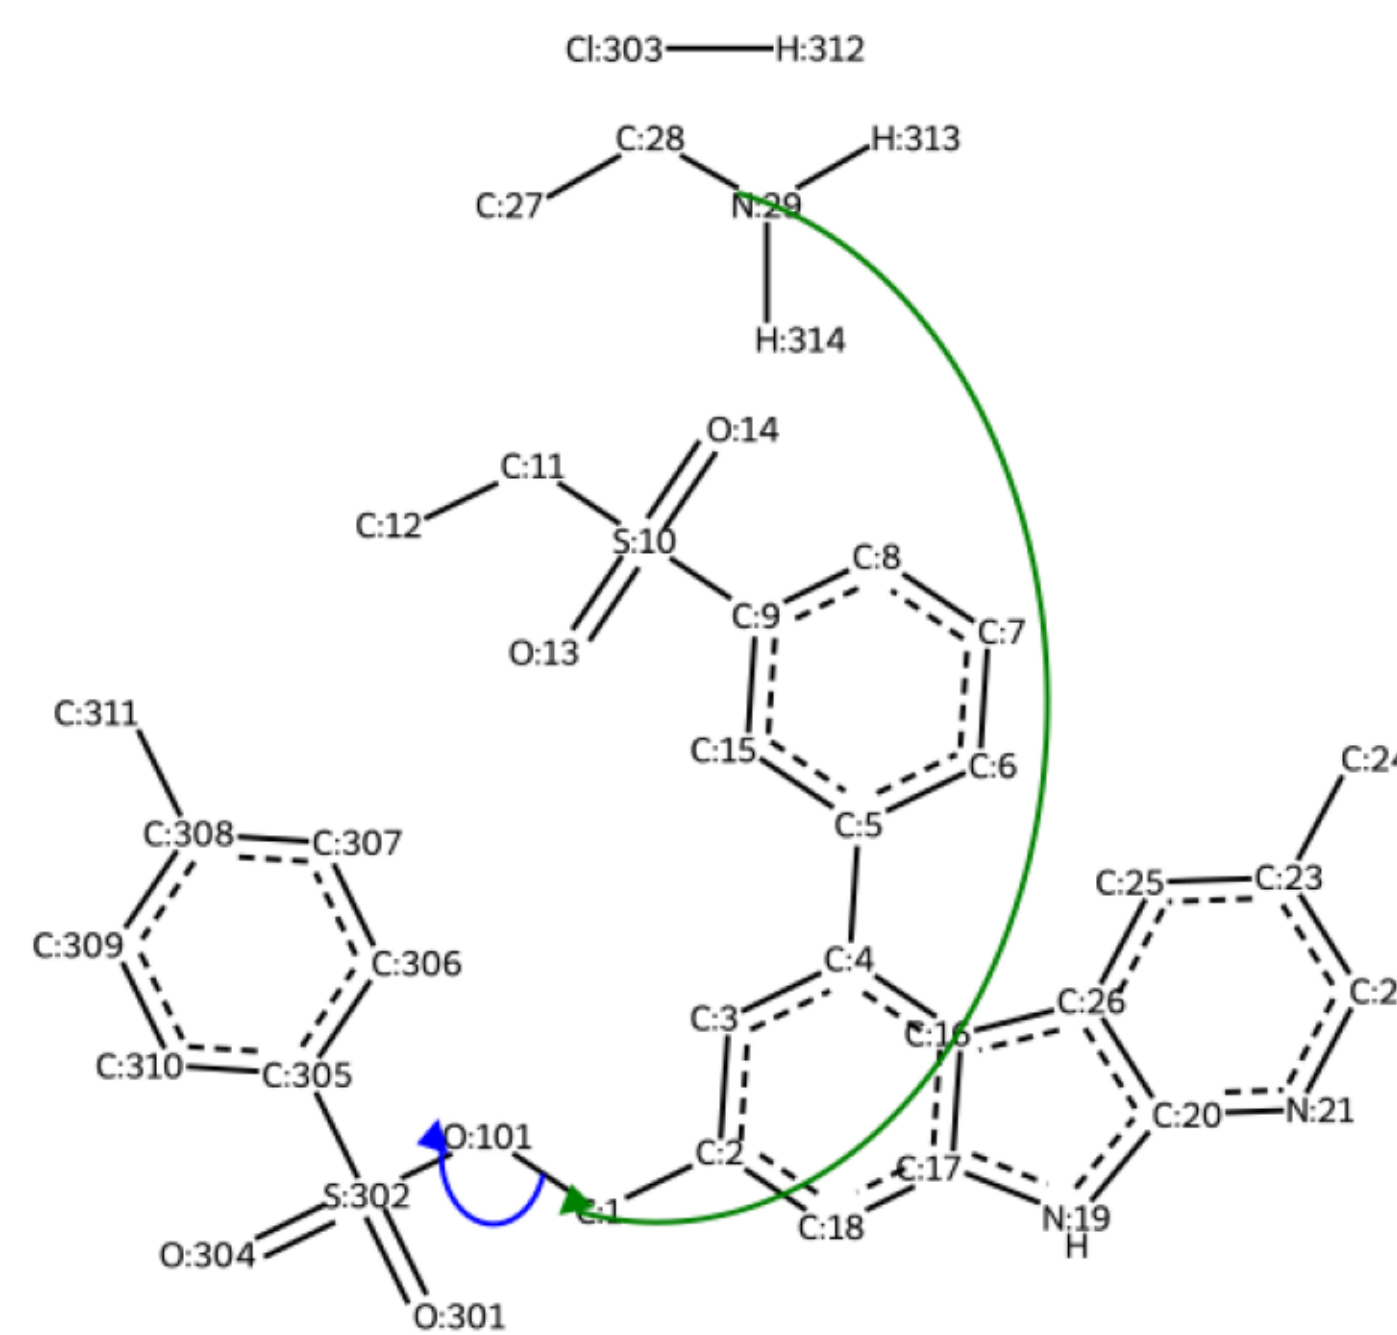

step #5

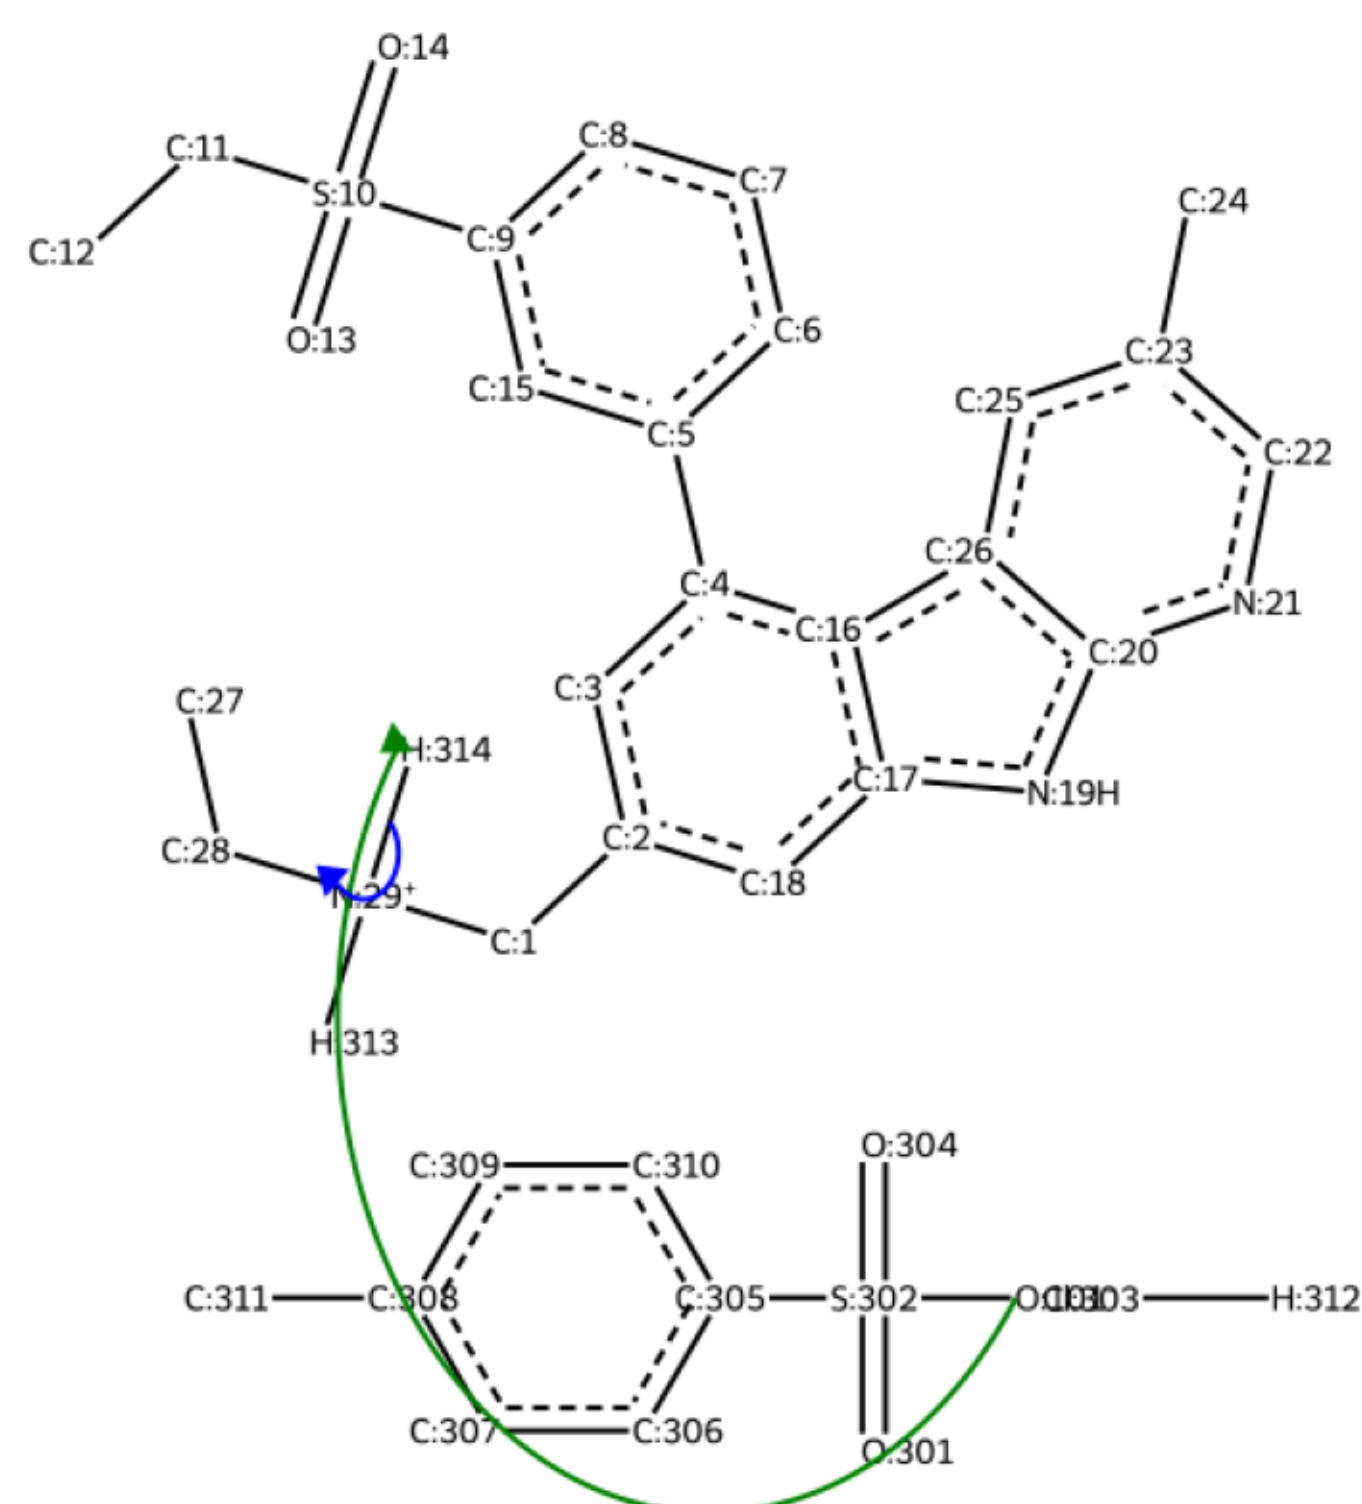

Product(s)

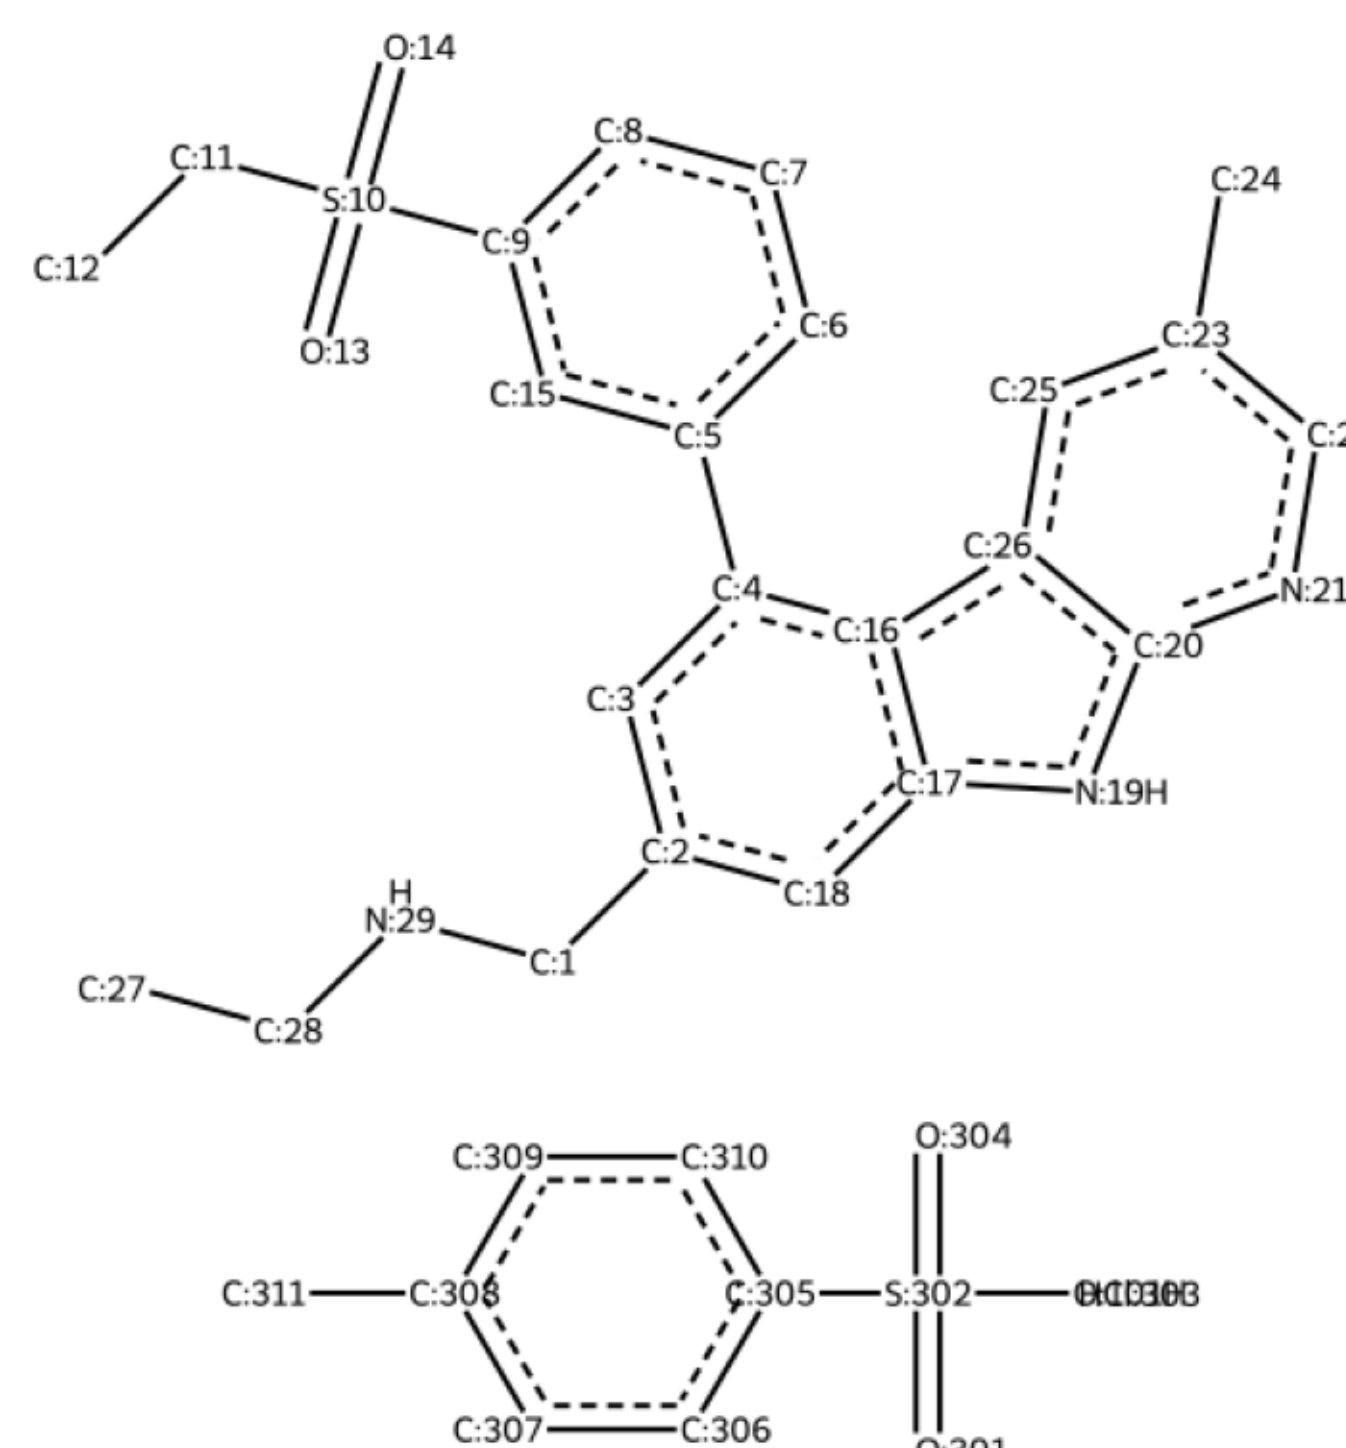



Original reaction  
sampled RXN\_ID:81)

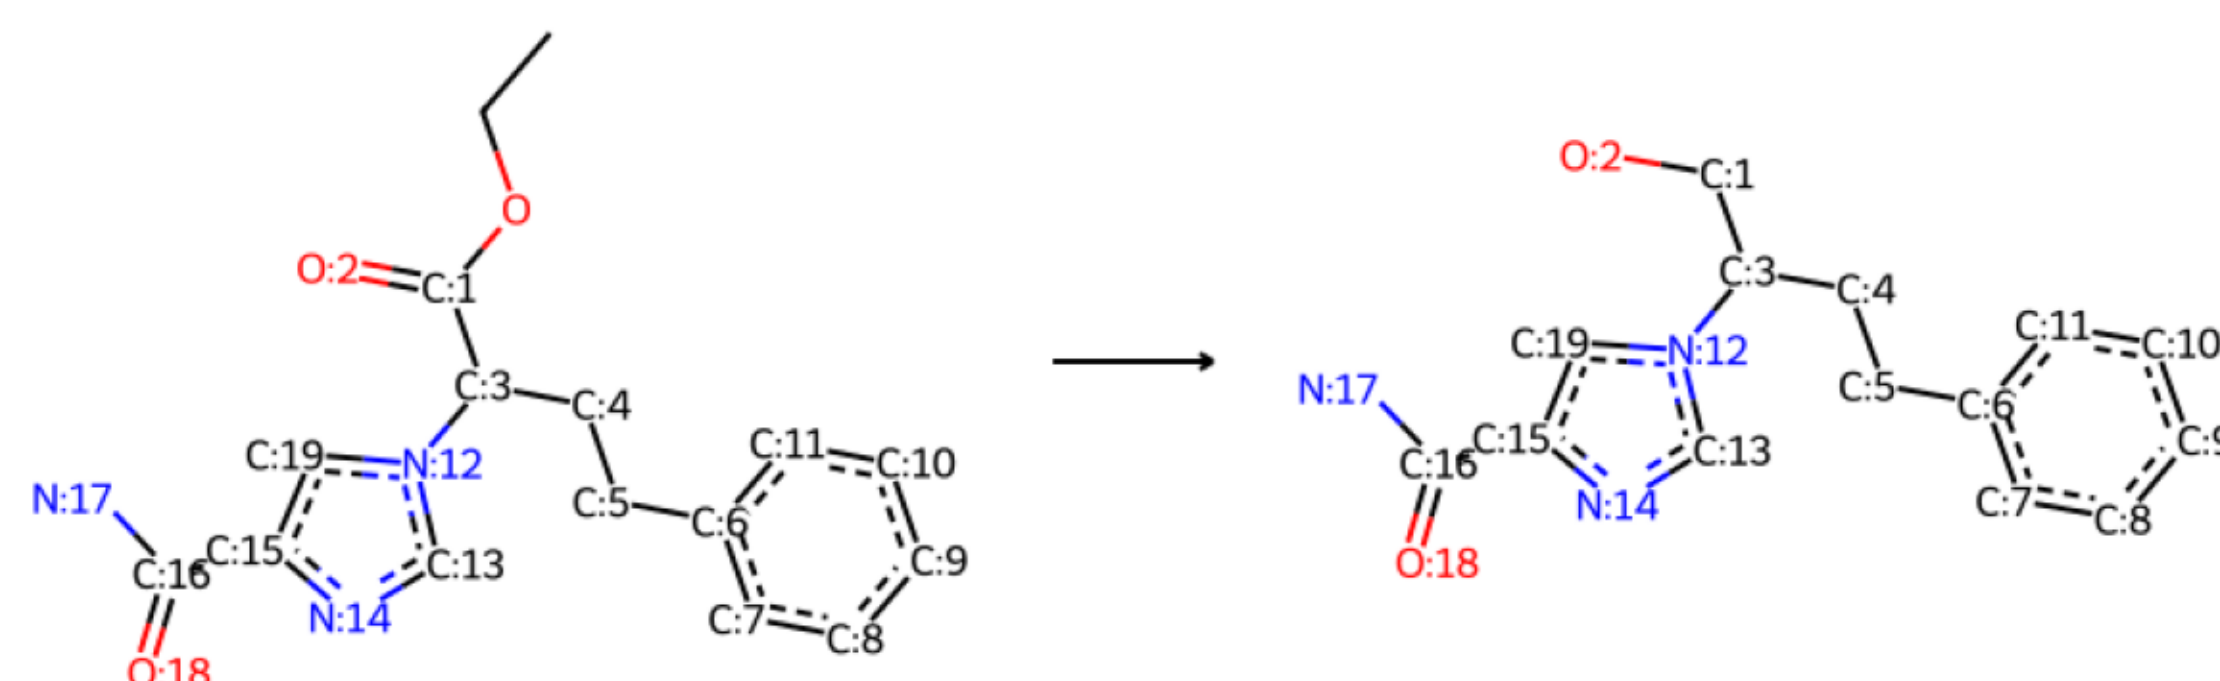

Identified mechanistic class -  
ester\_reduction reaction

Reaction with missing reagents recovered

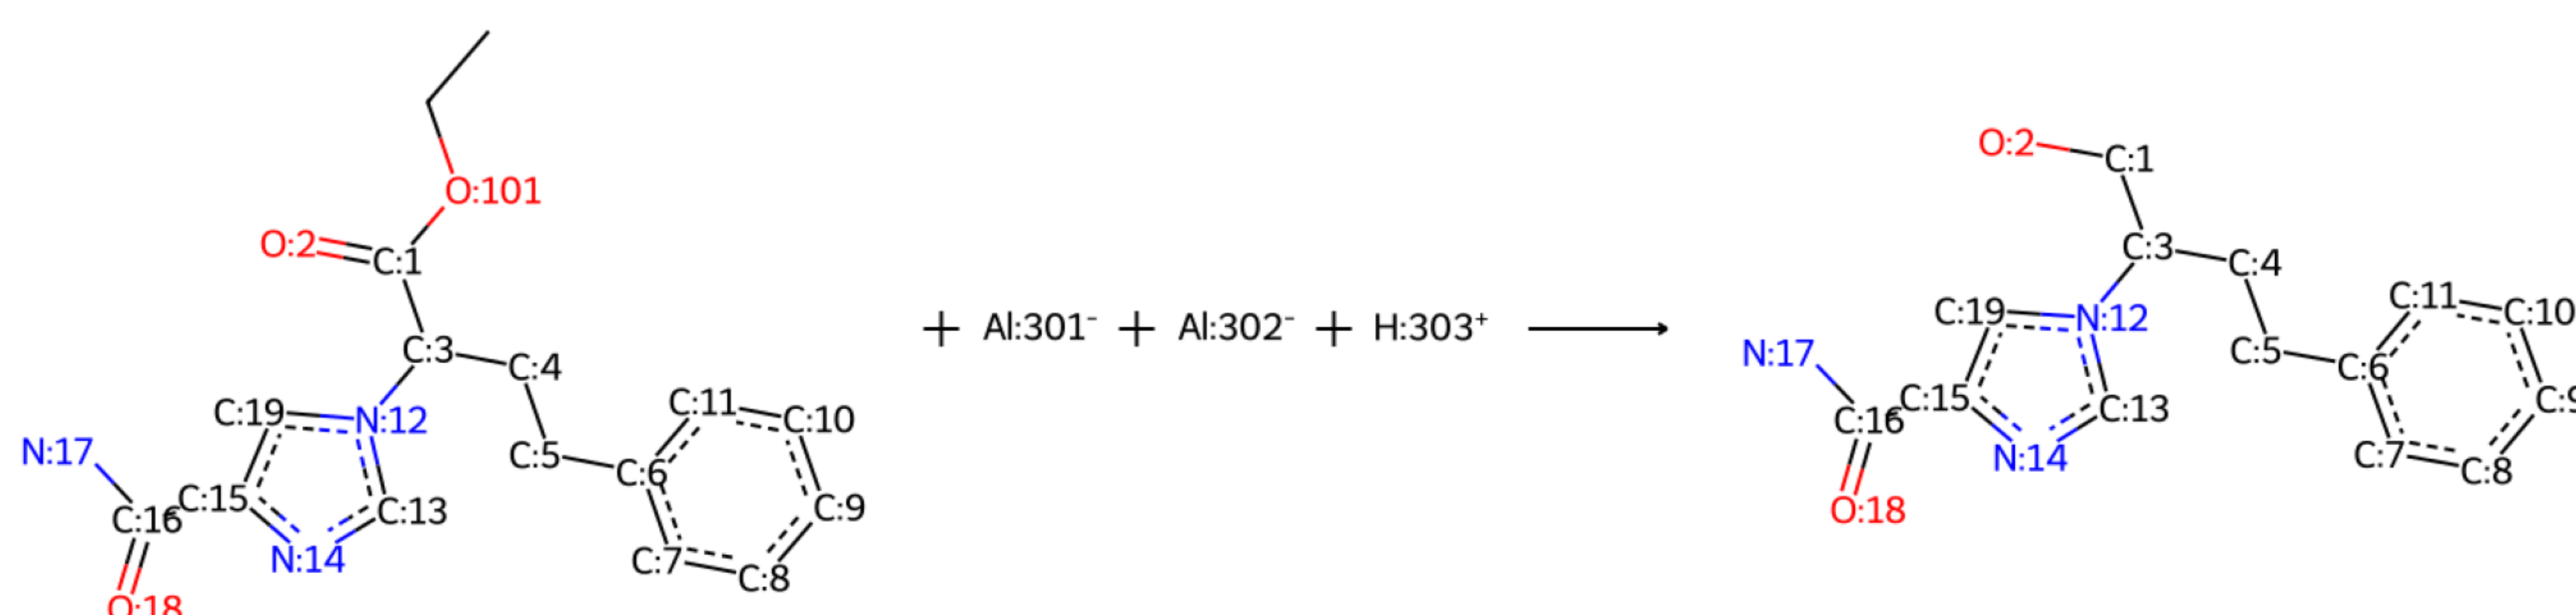

Proposed mechanistic pathway

[Arrow order: (1) green, (2) blue, (3) red, (4) orange]

step #1

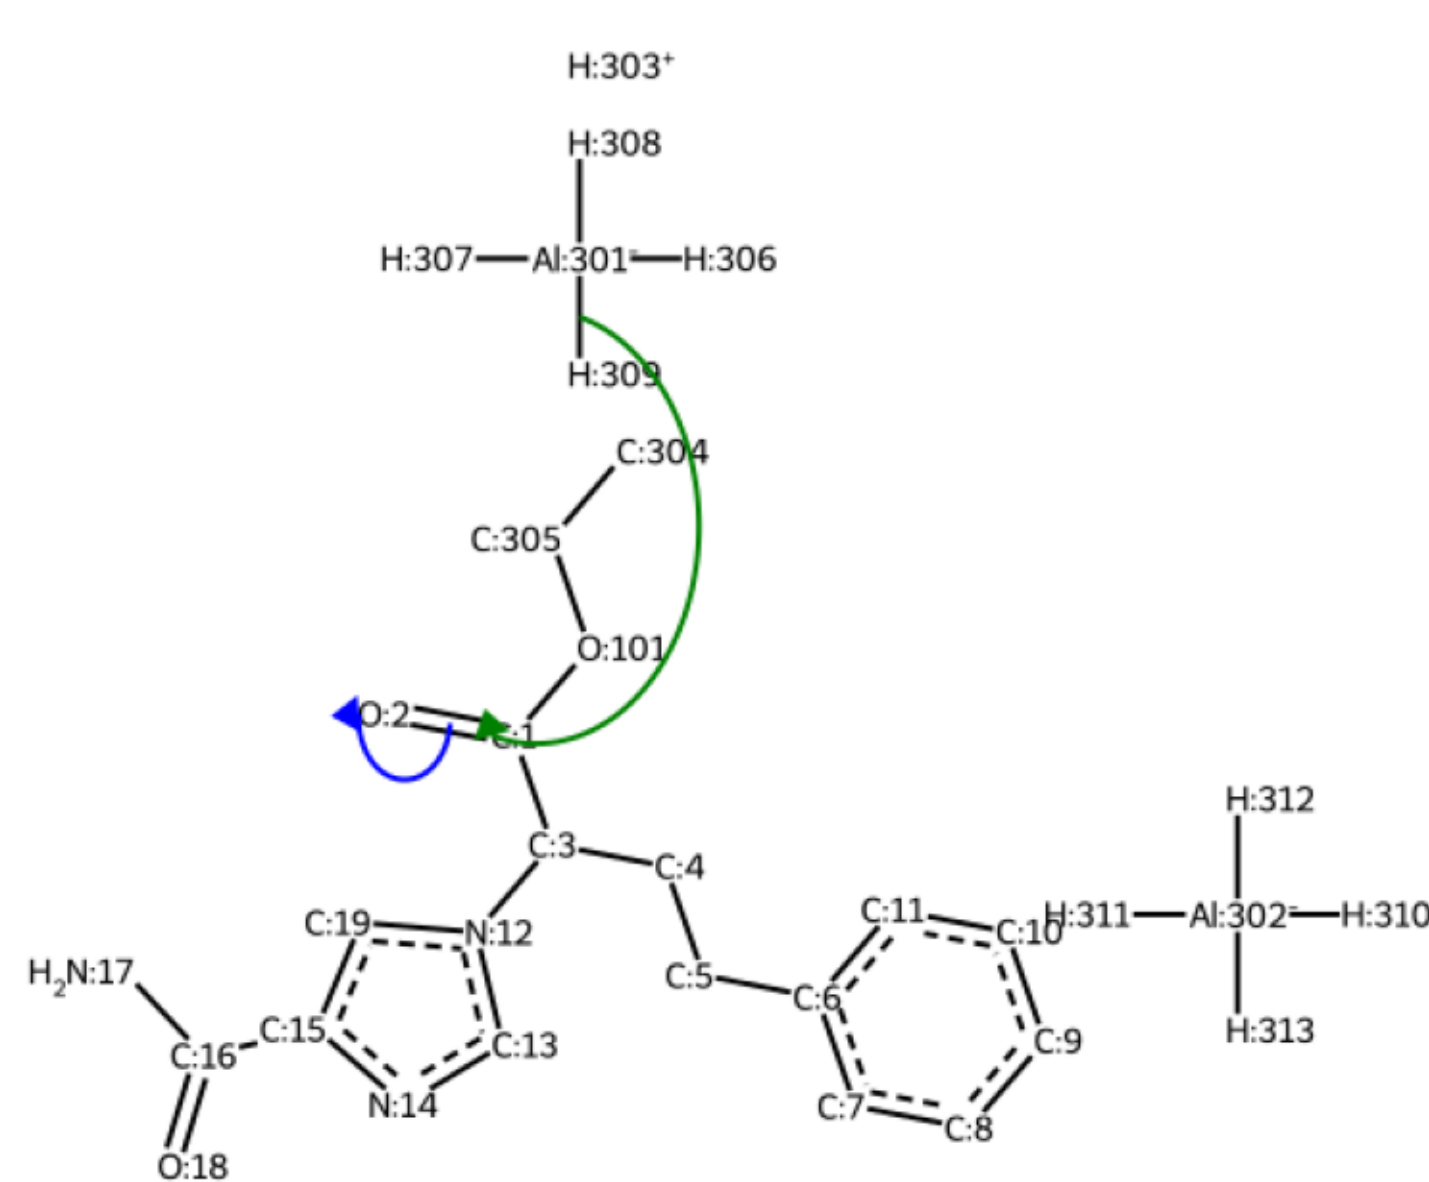

step #2

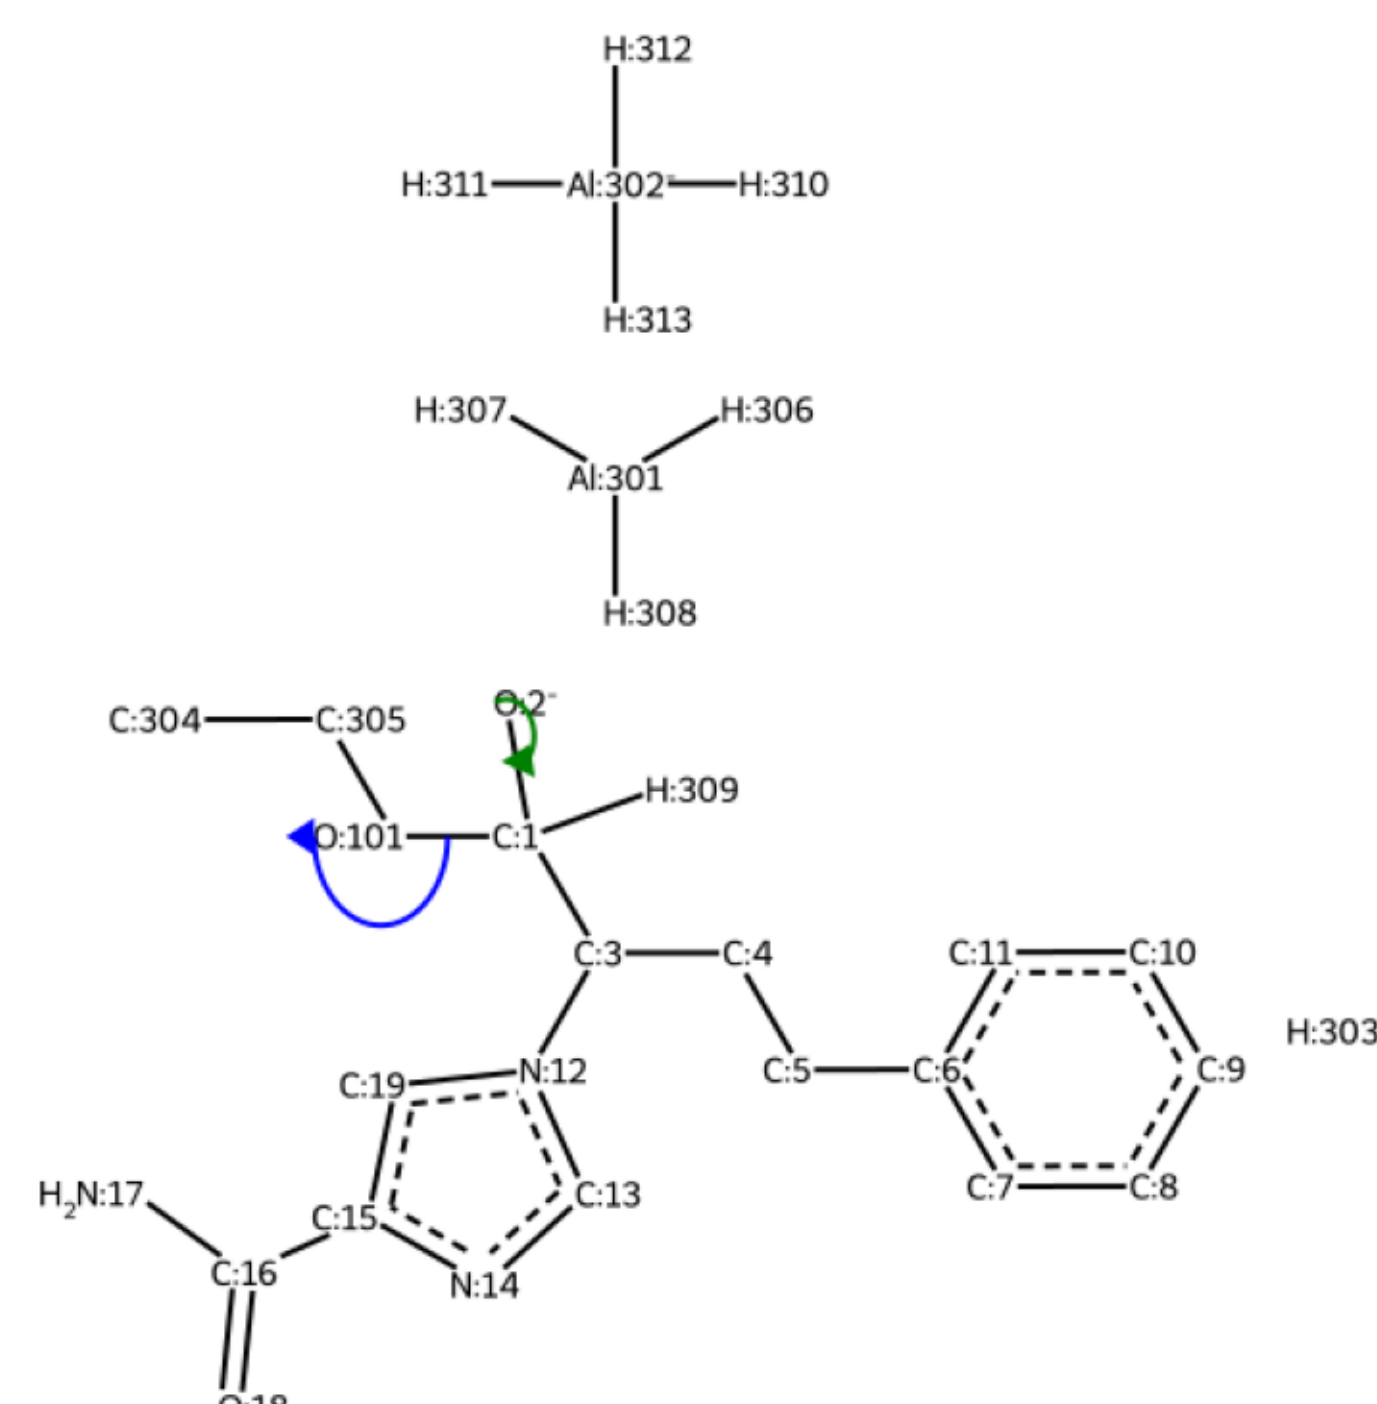

step #3

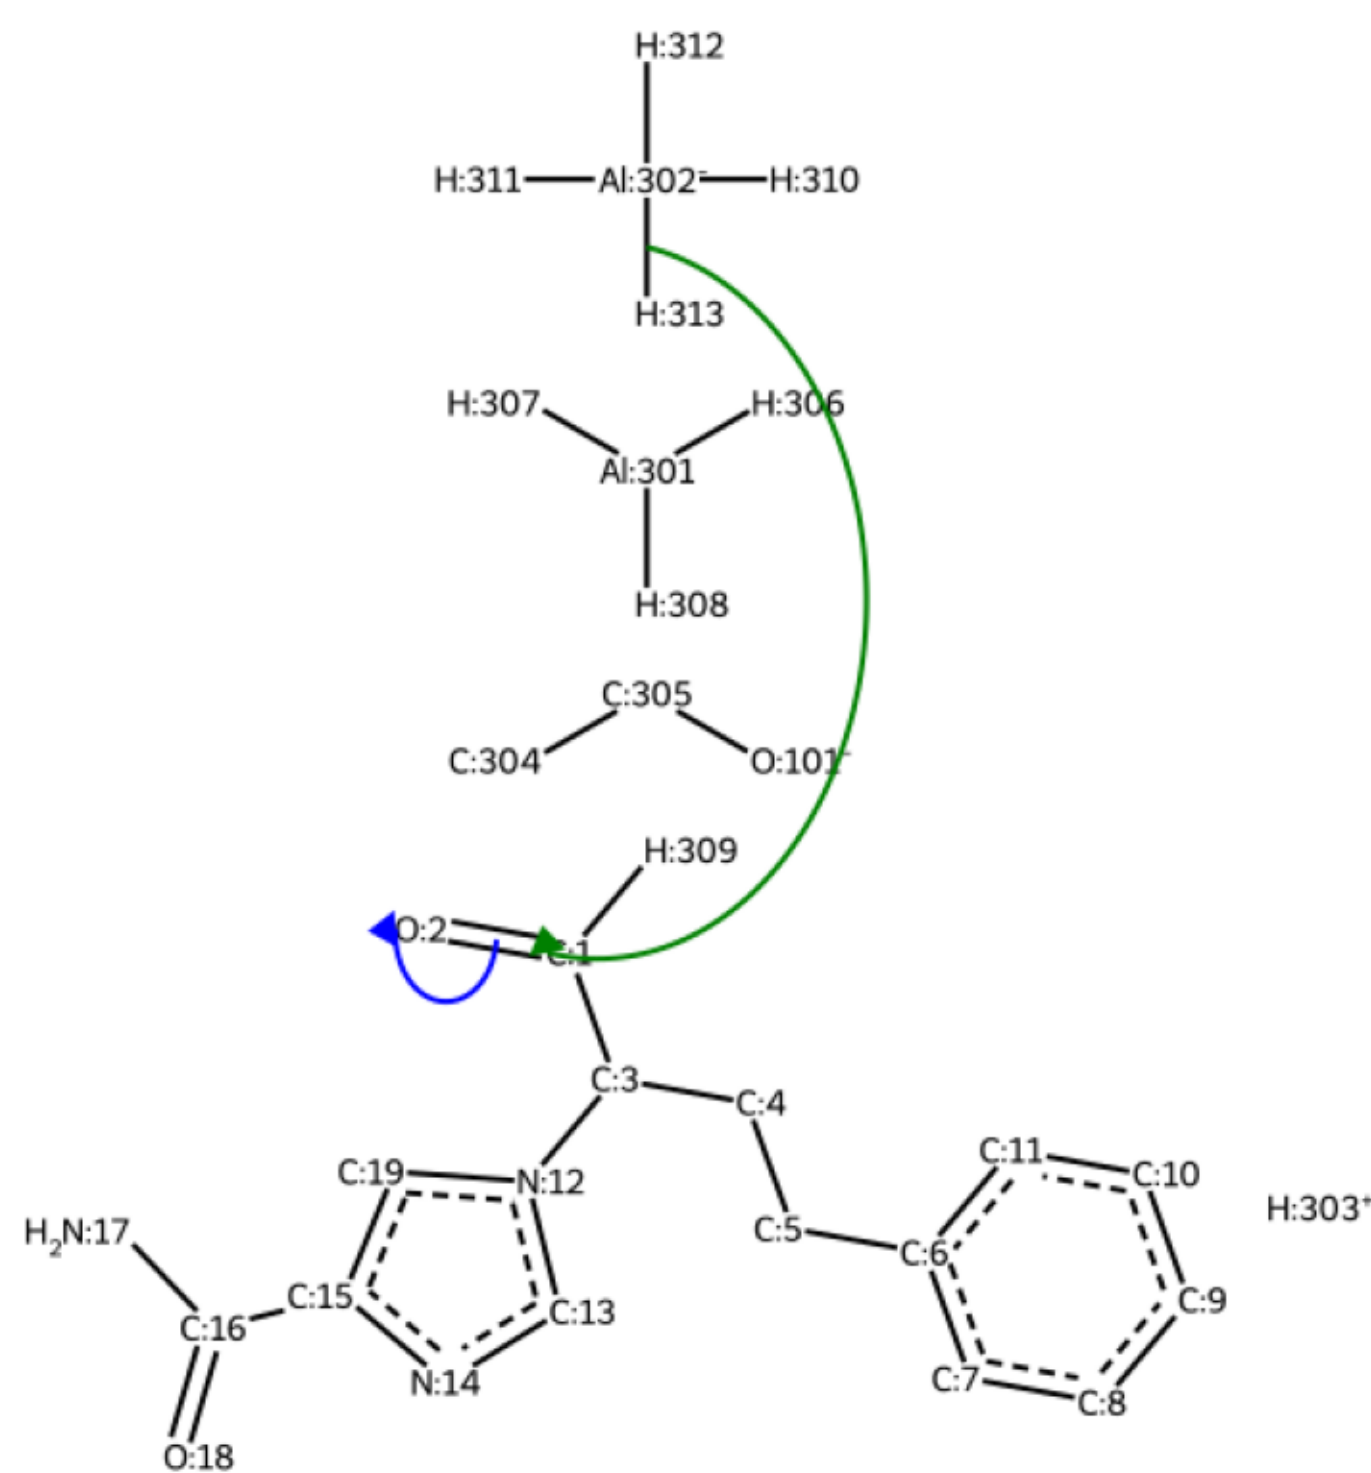

step #4

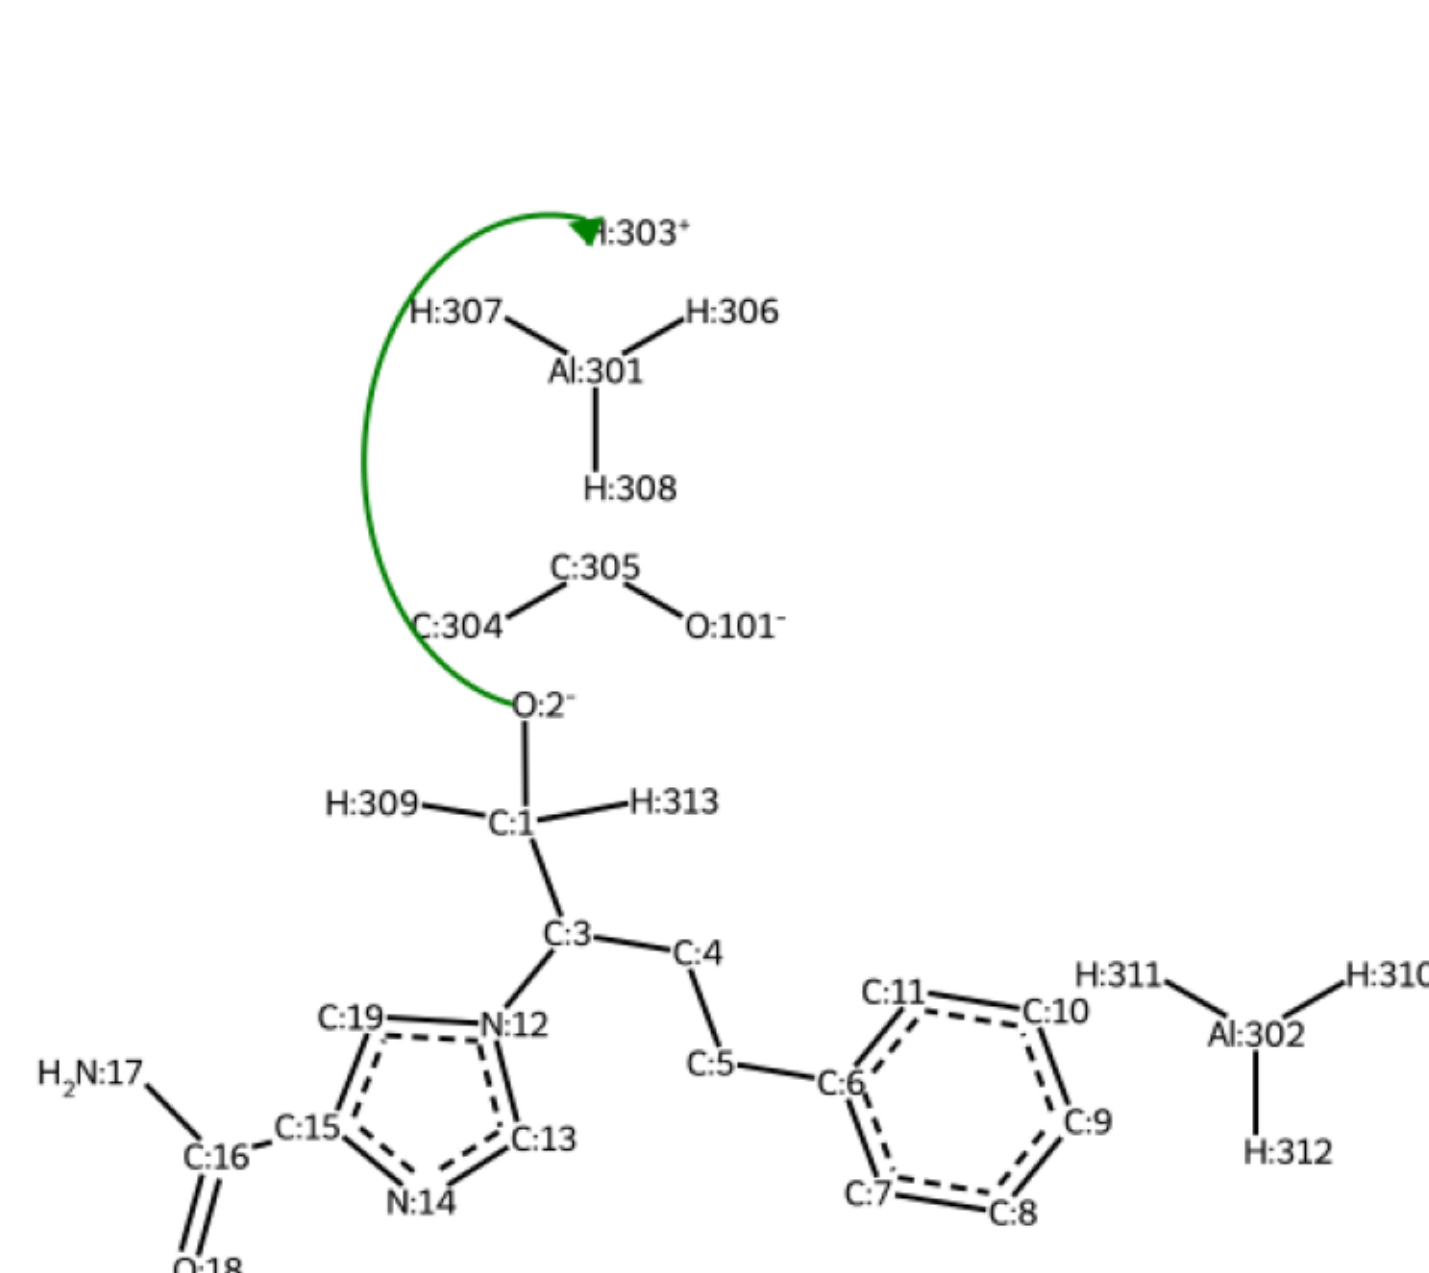

Product(s)

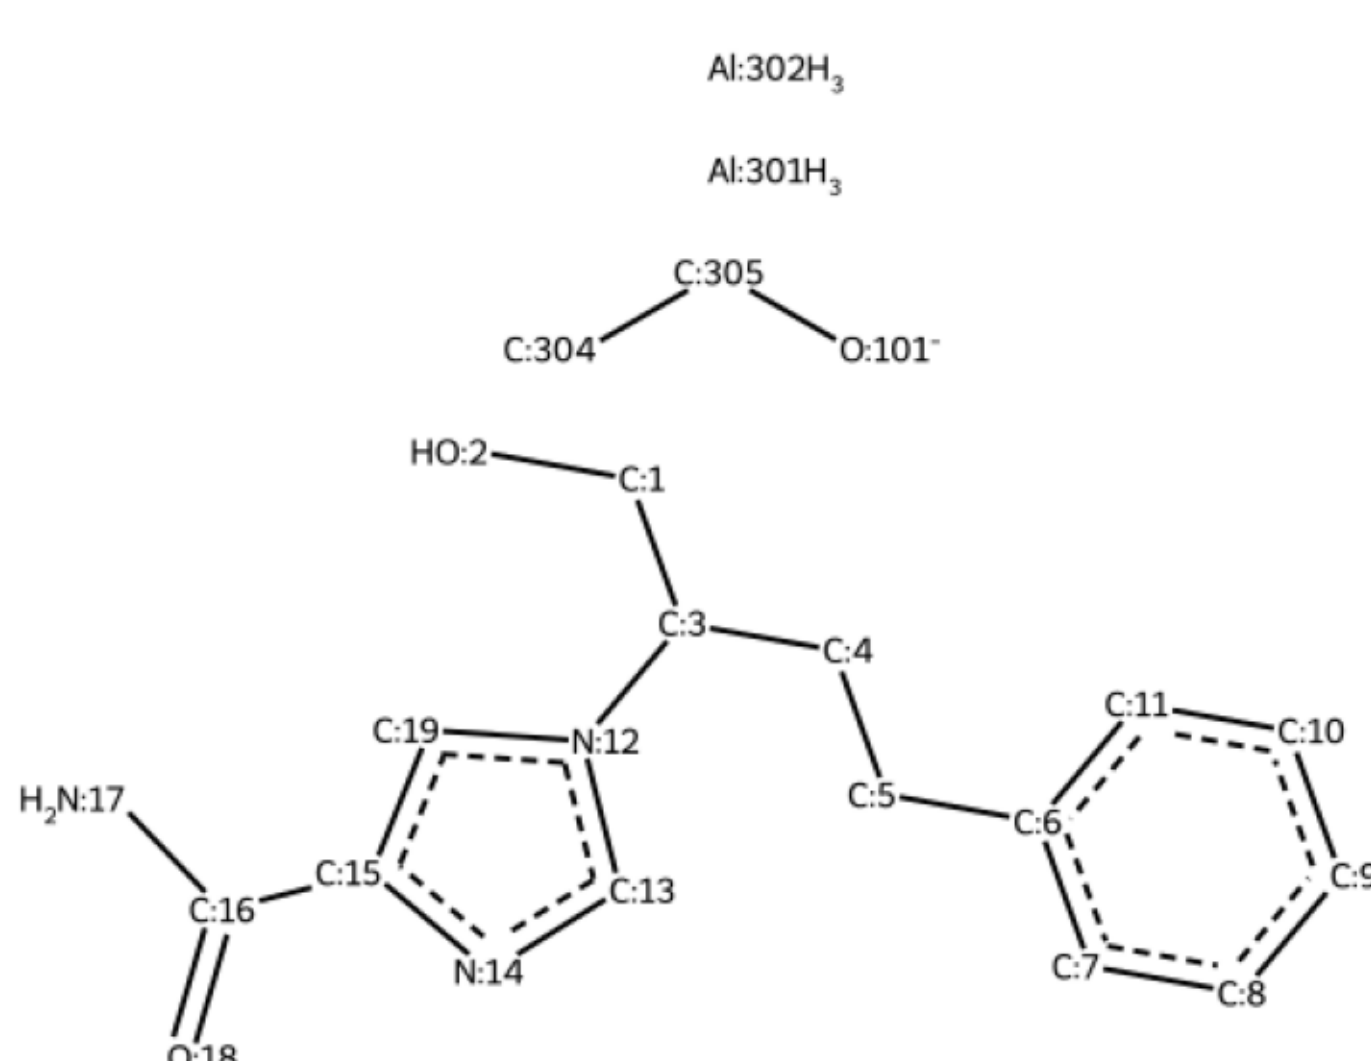



Original reaction  
sampled RXN\_ID:82)

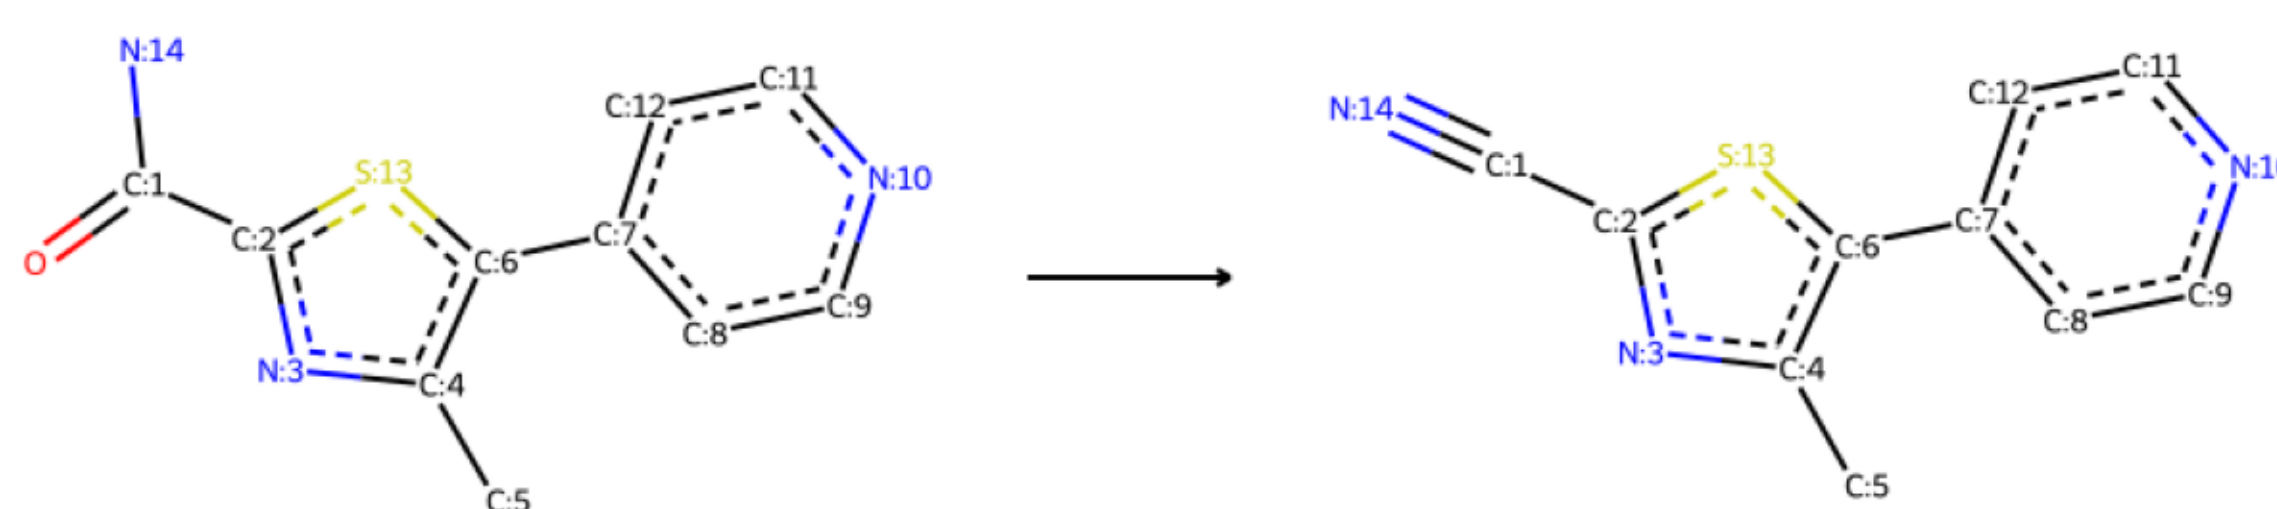

Identified mechanistic class -  
primary\_amide\_dehydration reaction

Reaction with missing reagents recovered

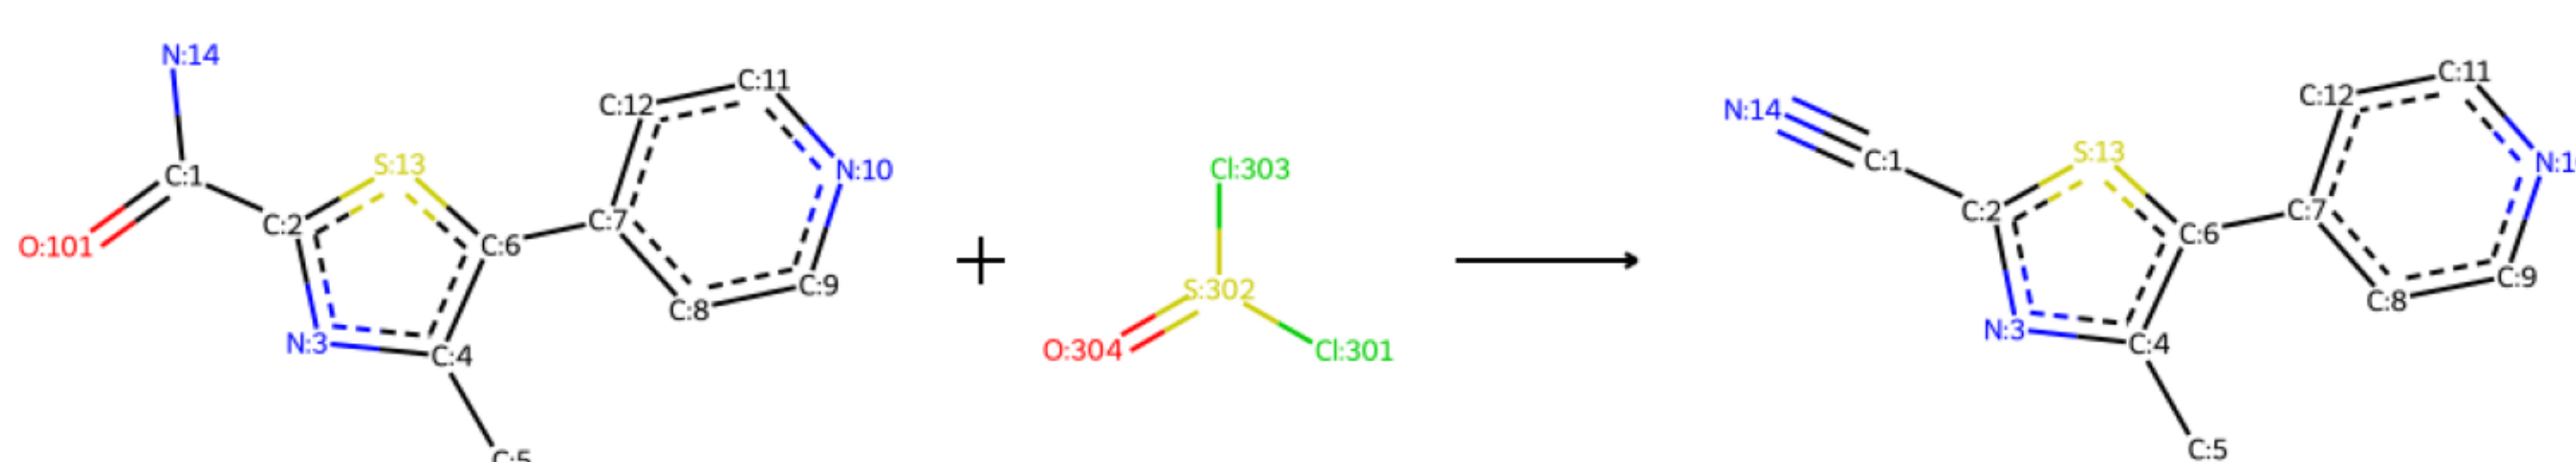

Proposed mechanistic pathway

[Arrow order: (1) green, (2) blue, (3) red, (4) orange]

step #1

step #2

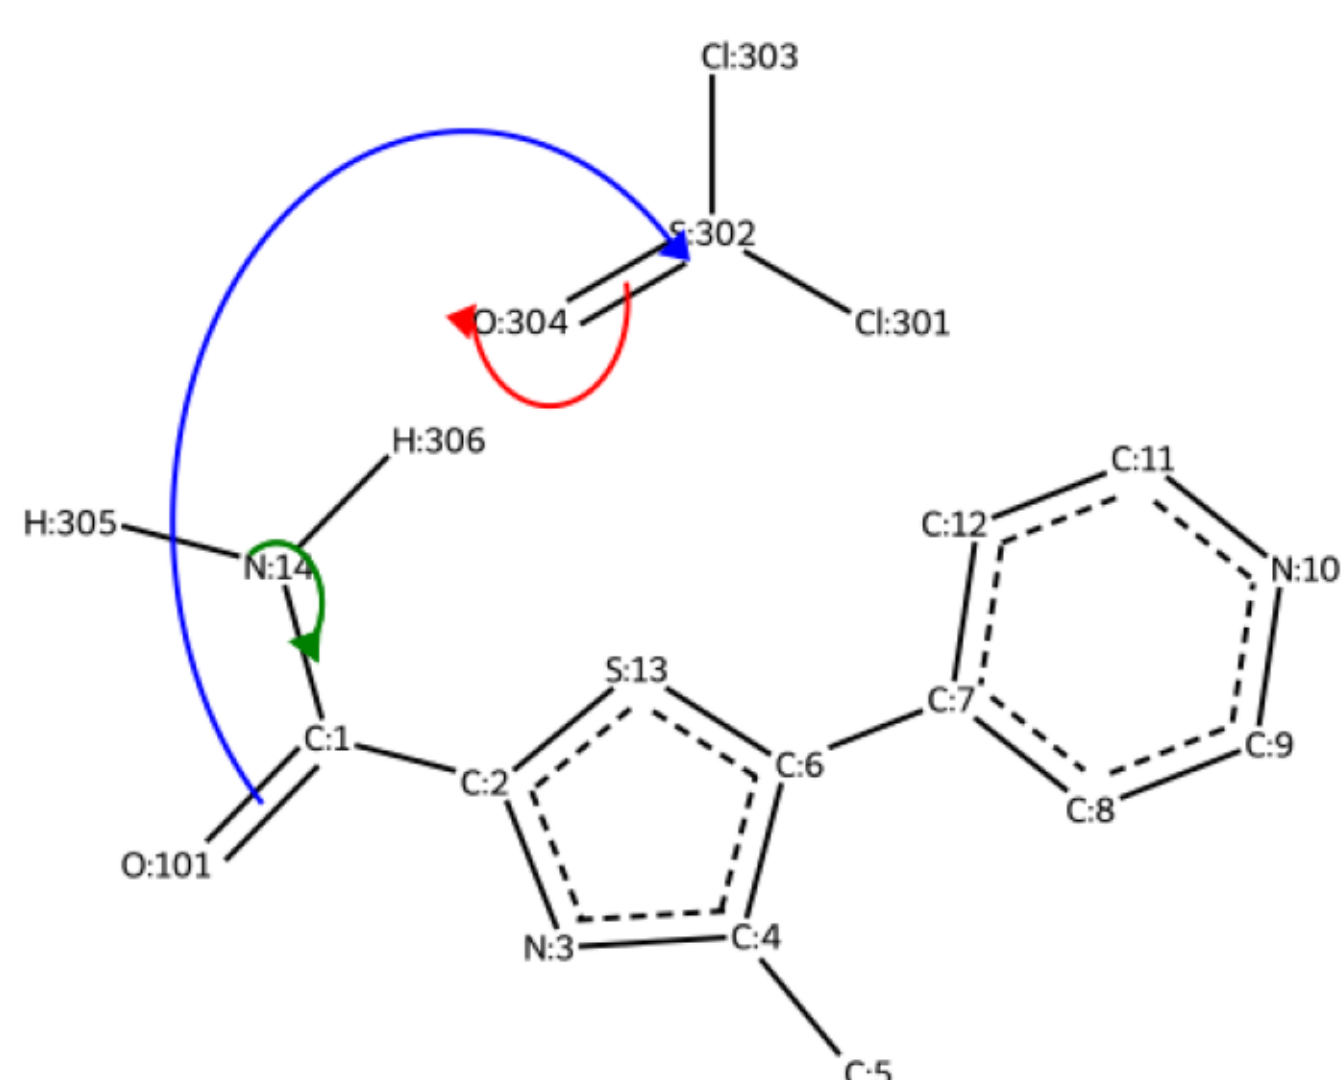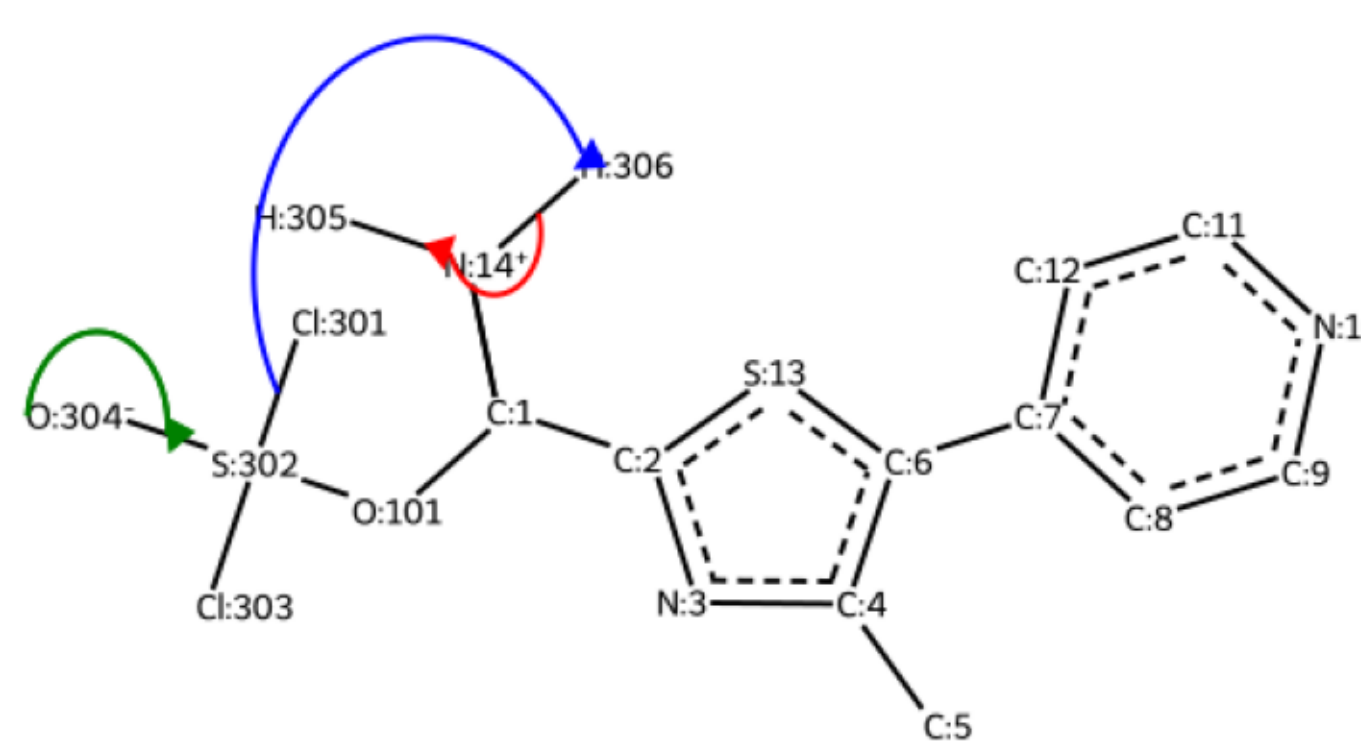

step #3

Product(s)

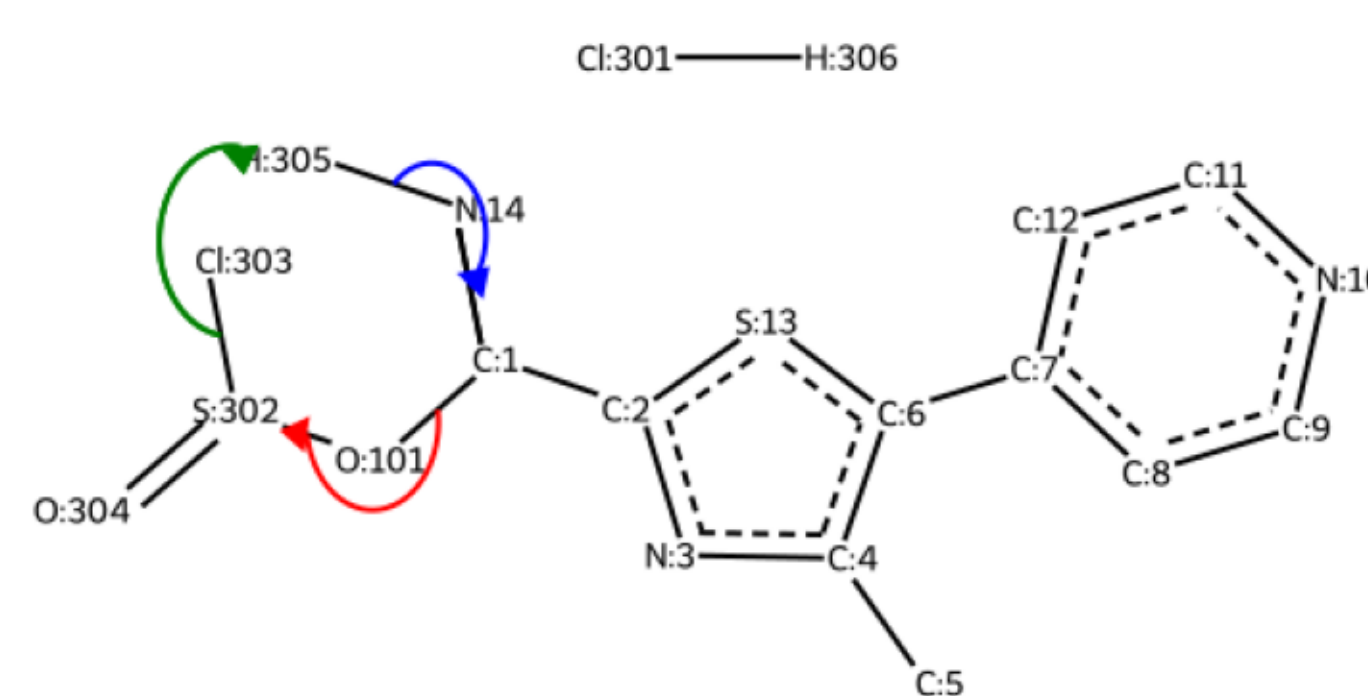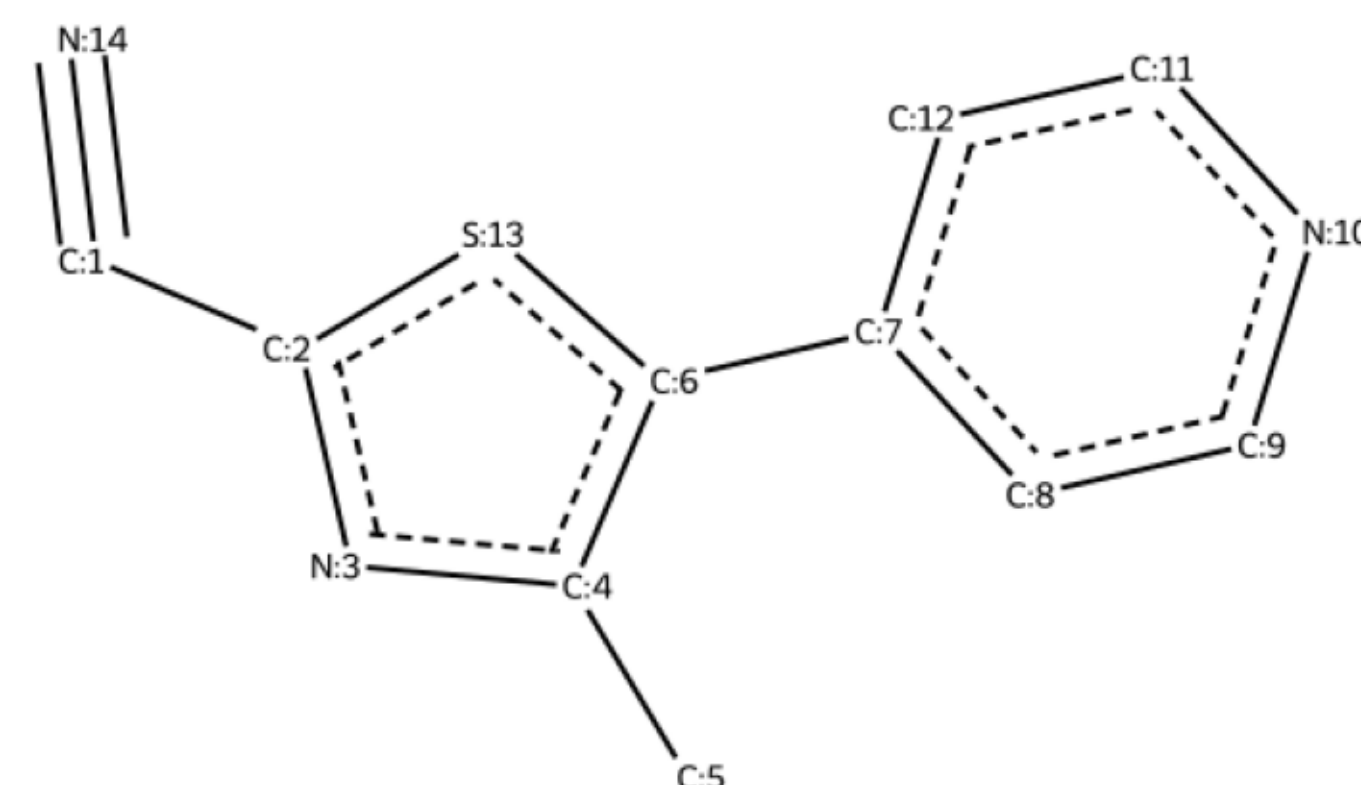

Original reaction  
sampled RXN\_ID:83)

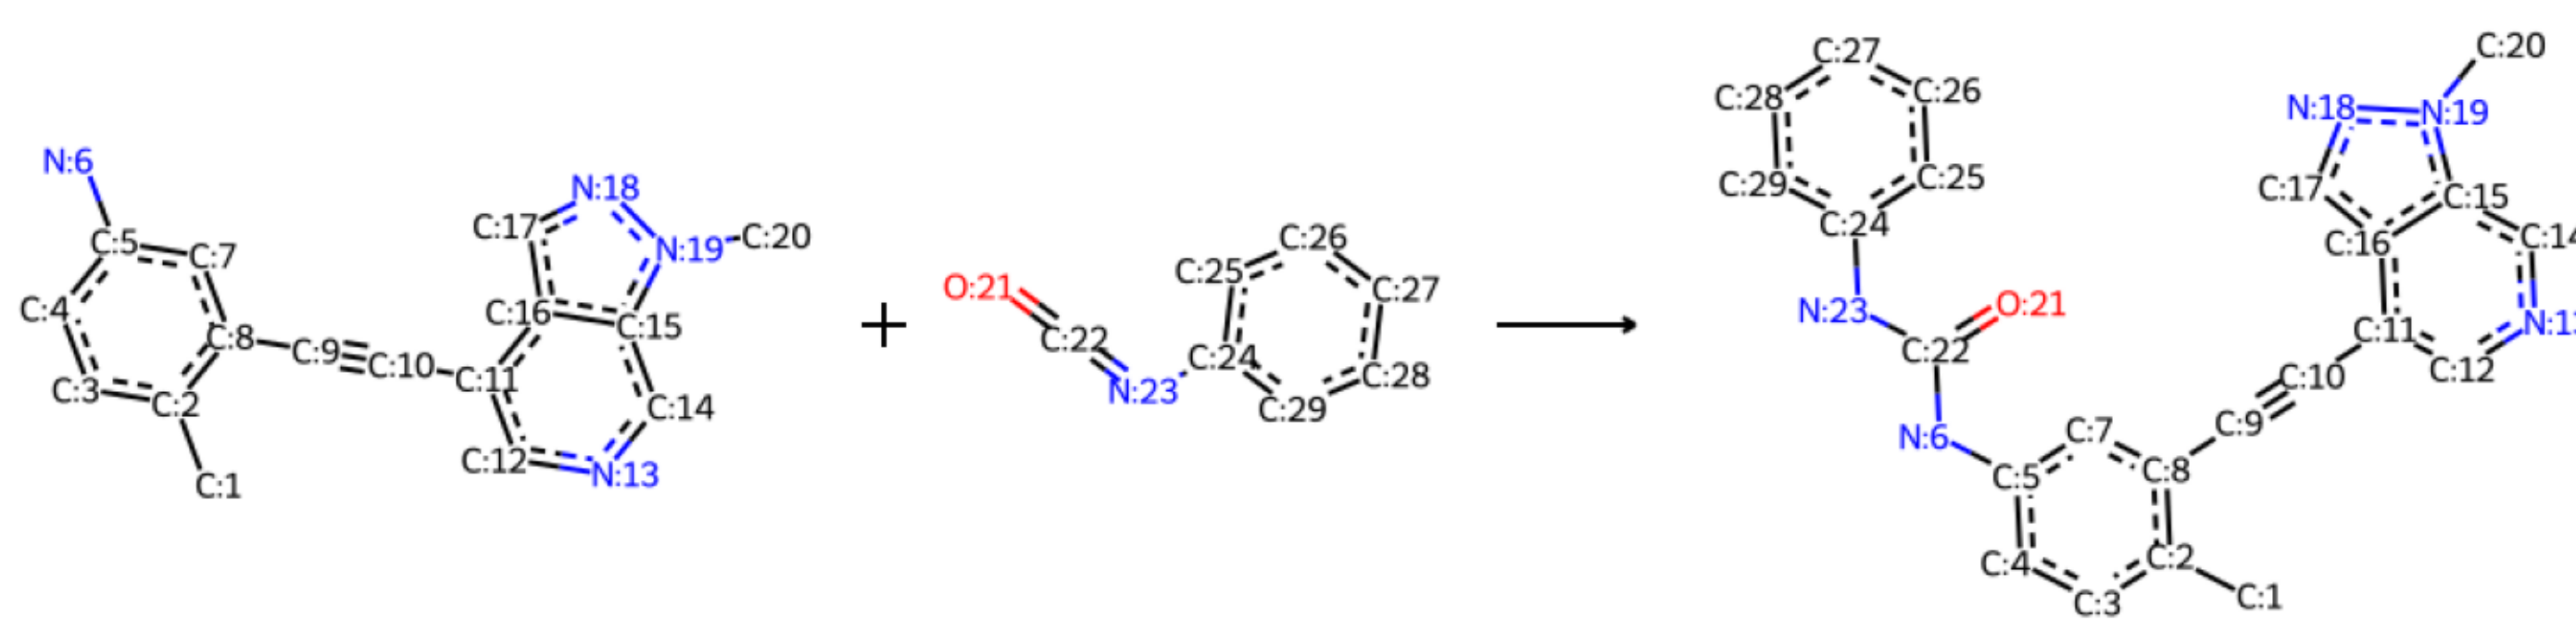

Identified mechanistic class -  
nucleophilic\_attack\_to\_iso(thio)cyanate reaction

Reaction with missing reagents recovered

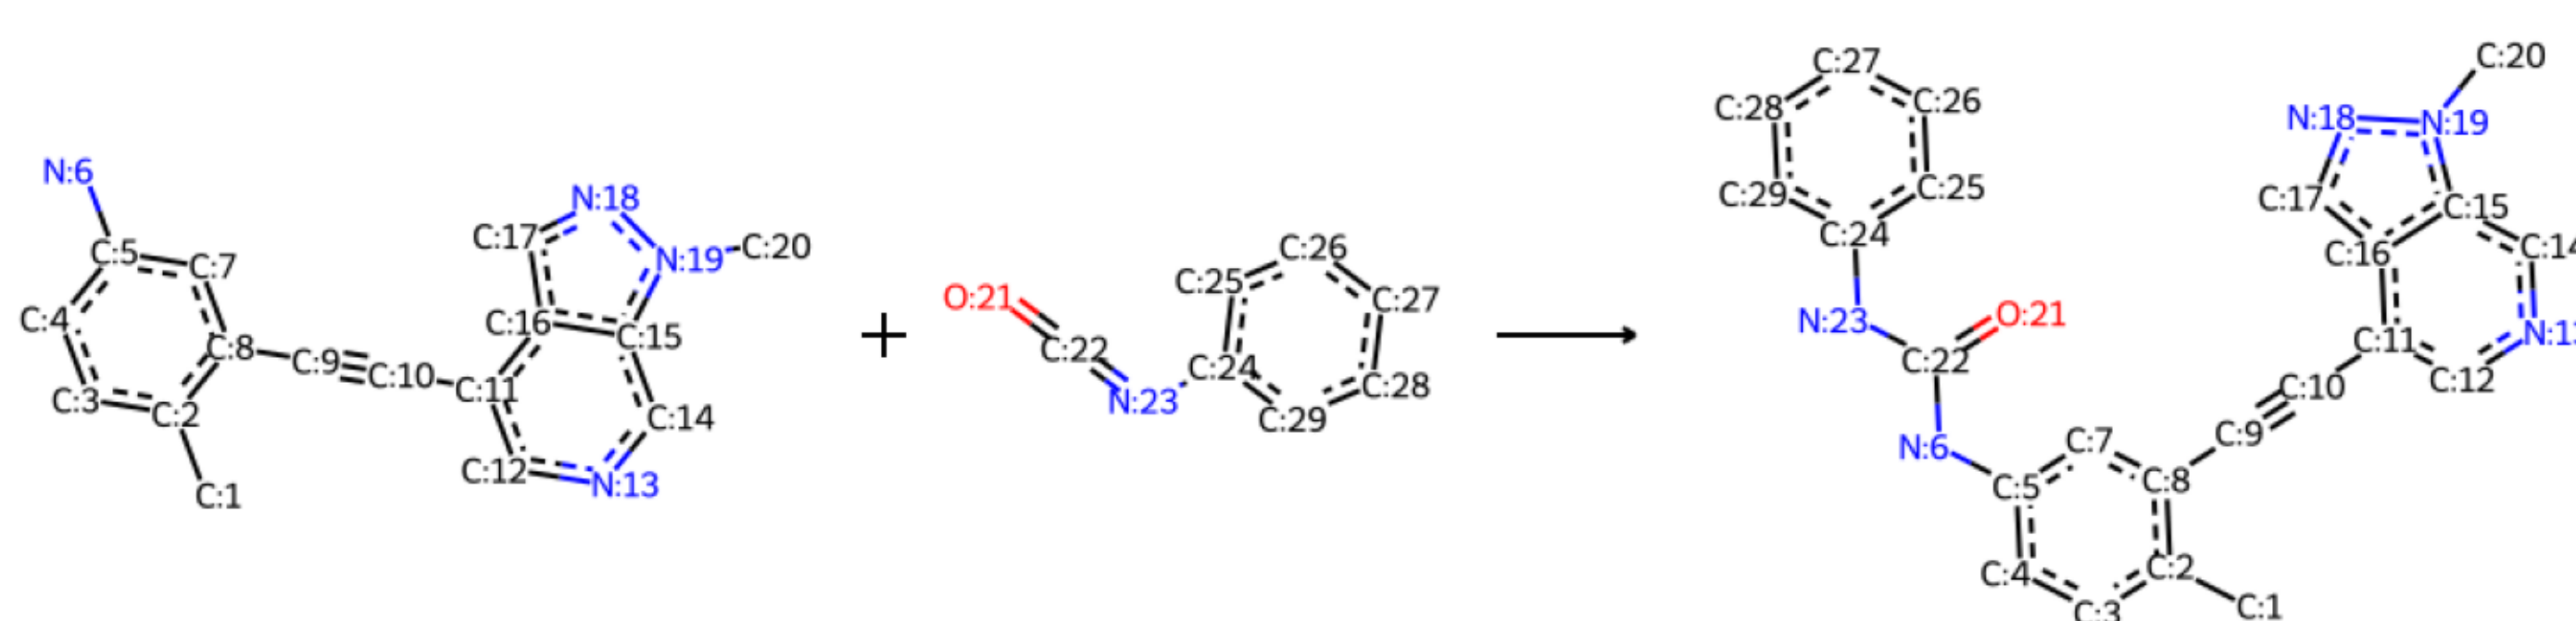

Proposed mechanistic pathway

[Arrow order: (1) green, (2) blue, (3) red, (4) orange]

step #1

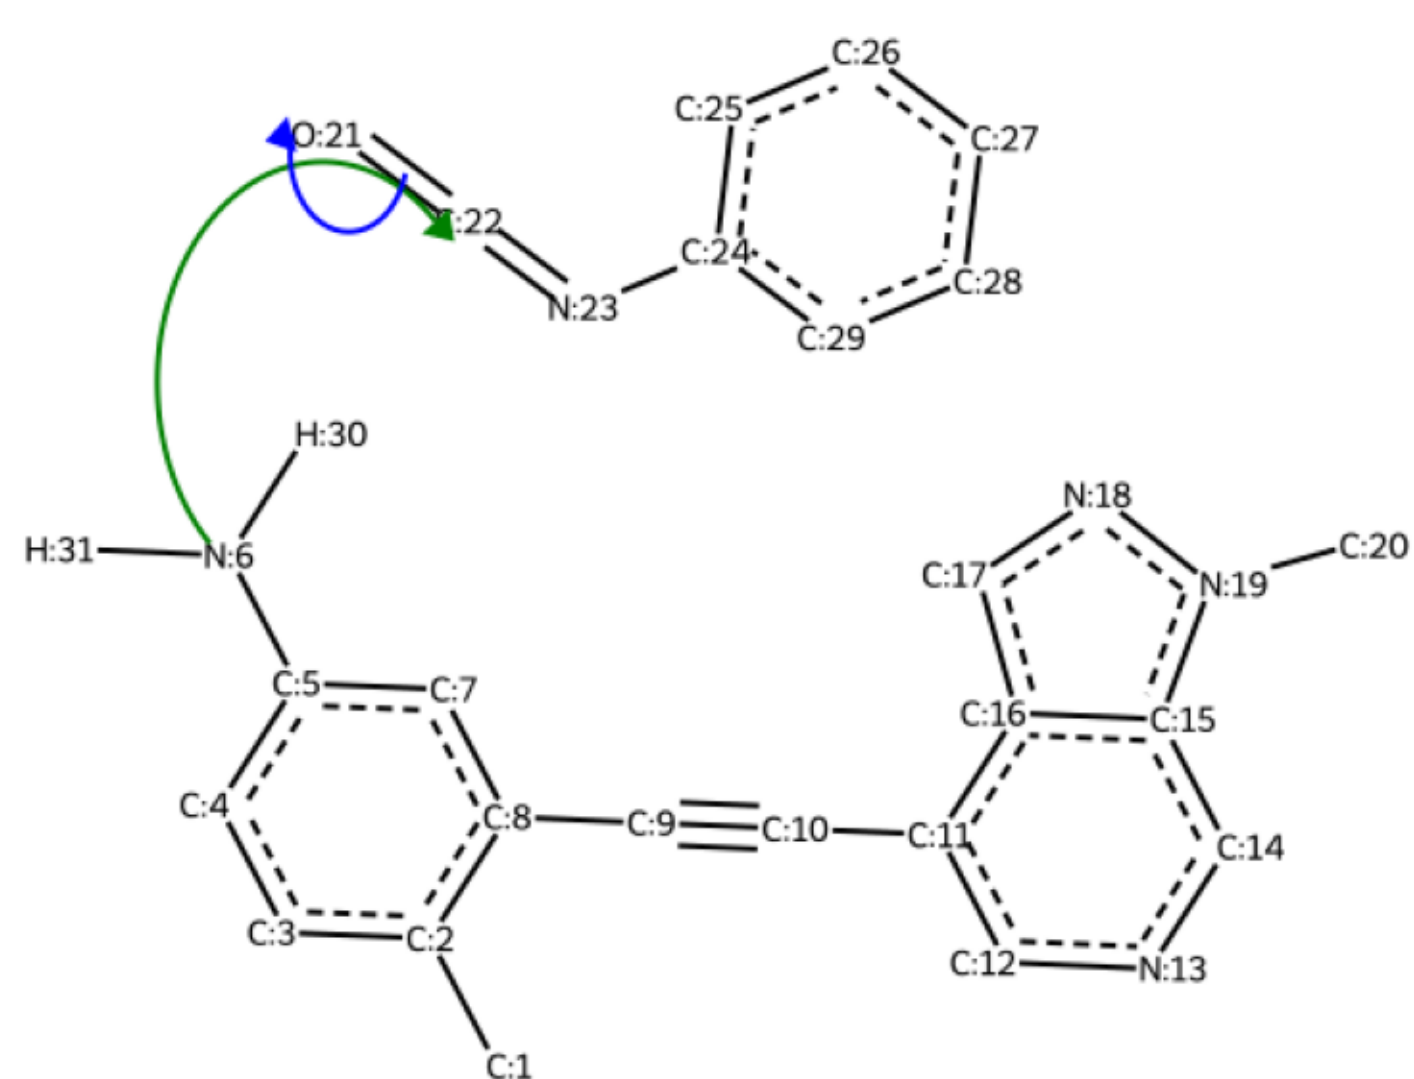

step #2

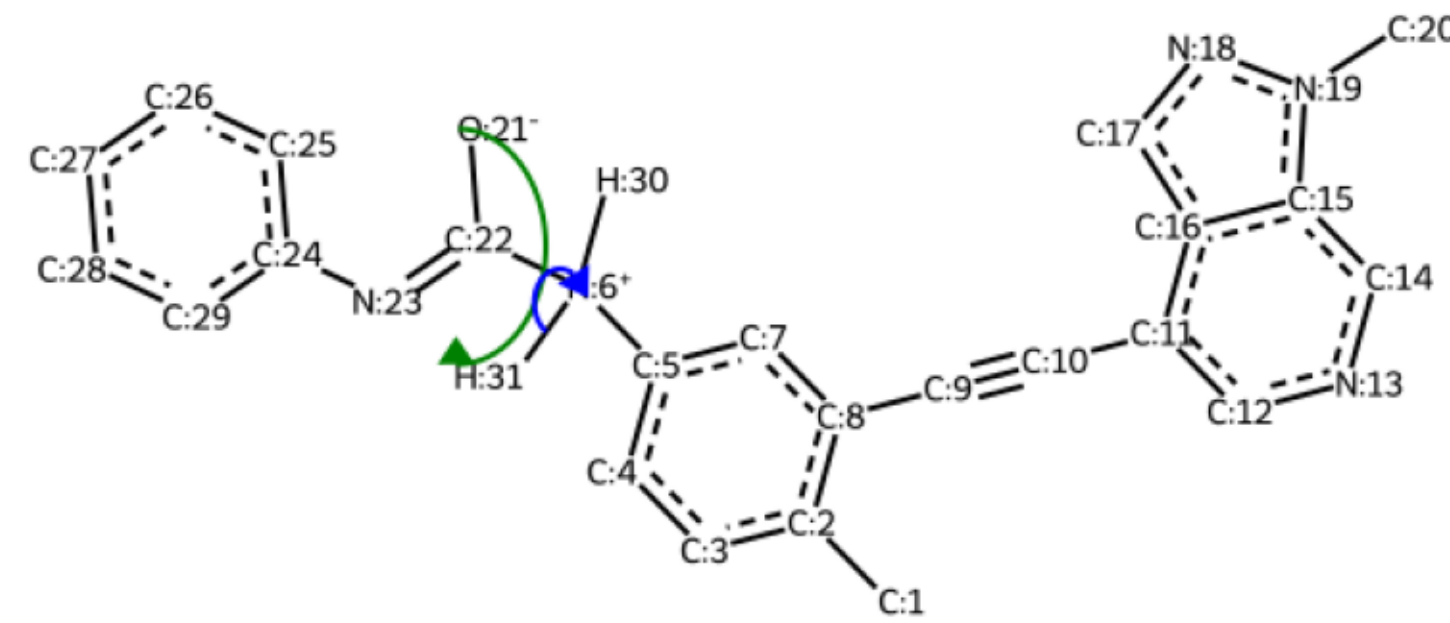

step #3

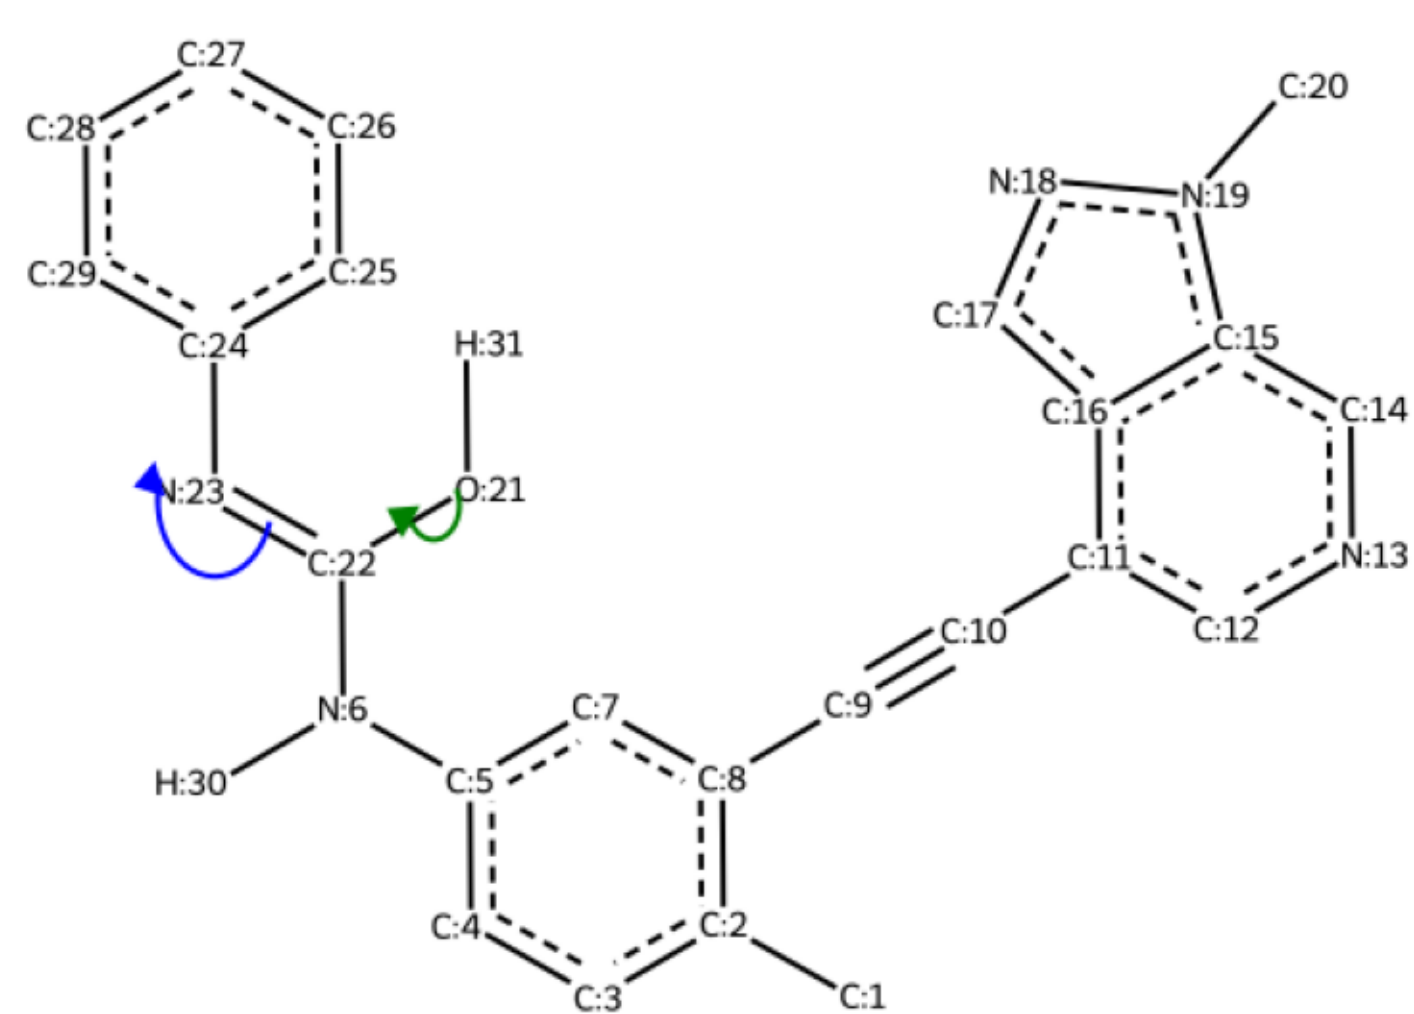

step #4

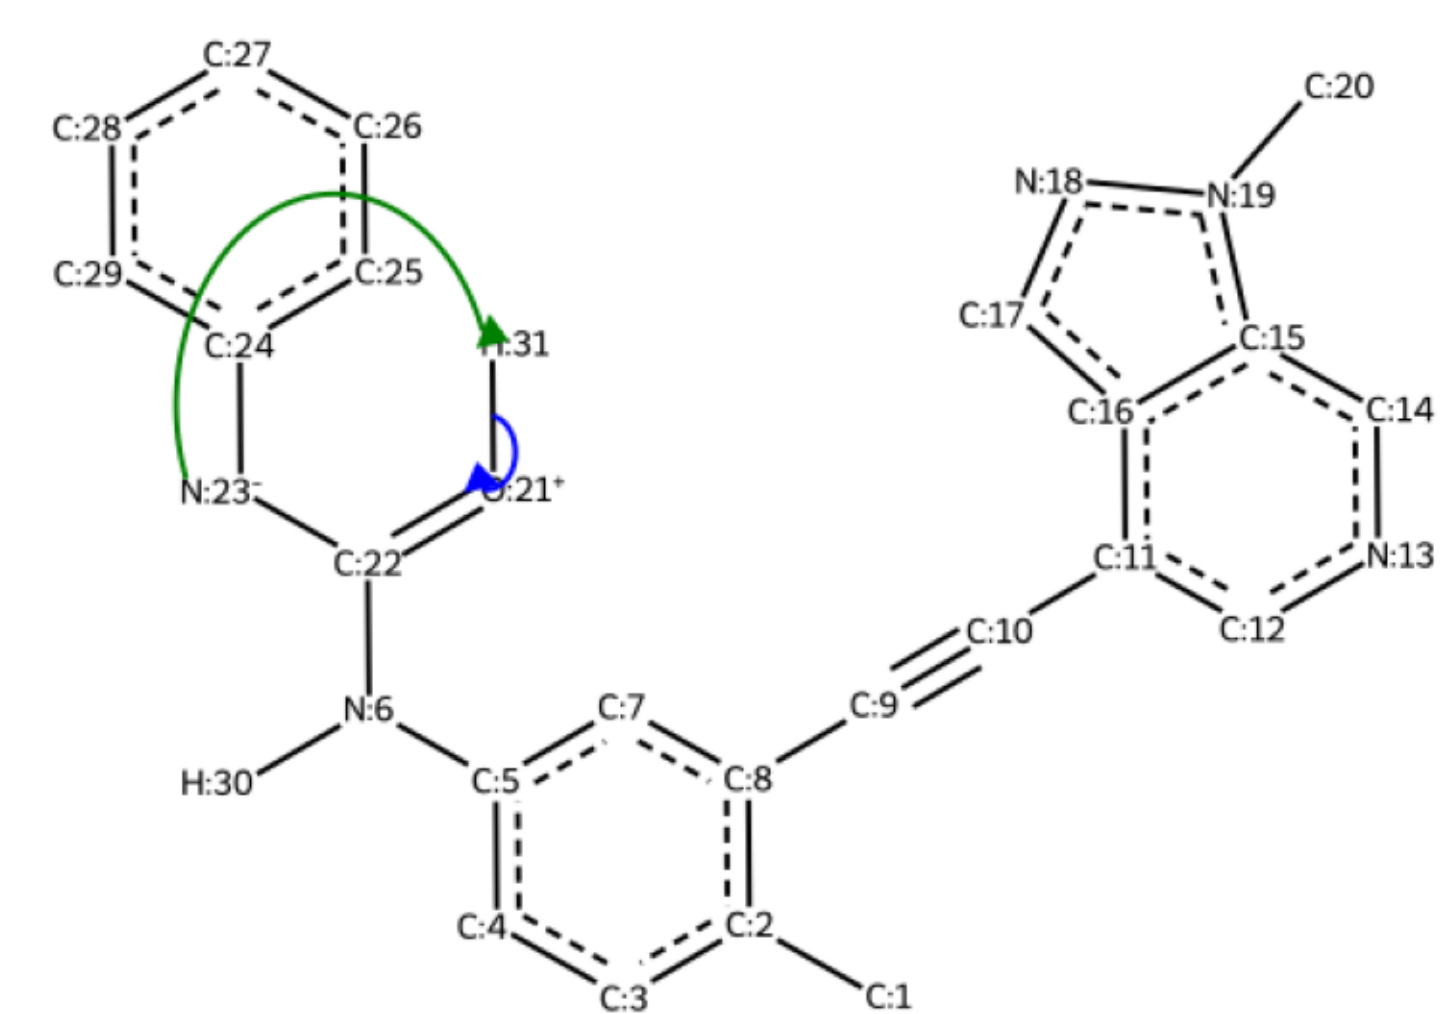

Product(s)

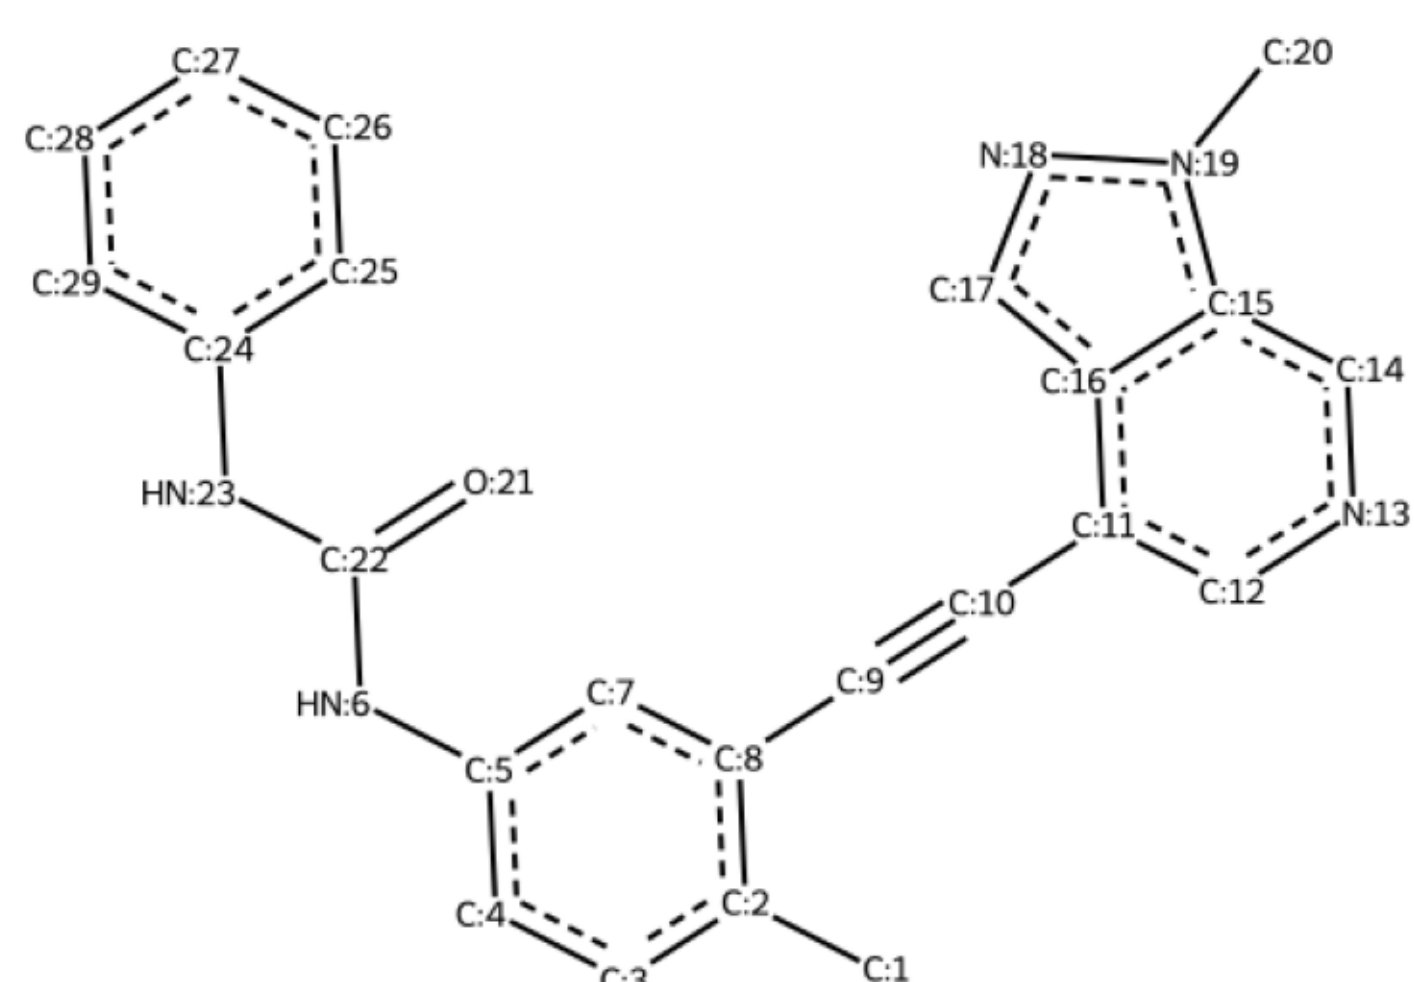



# Original reaction sampled RXN\_ID:84)

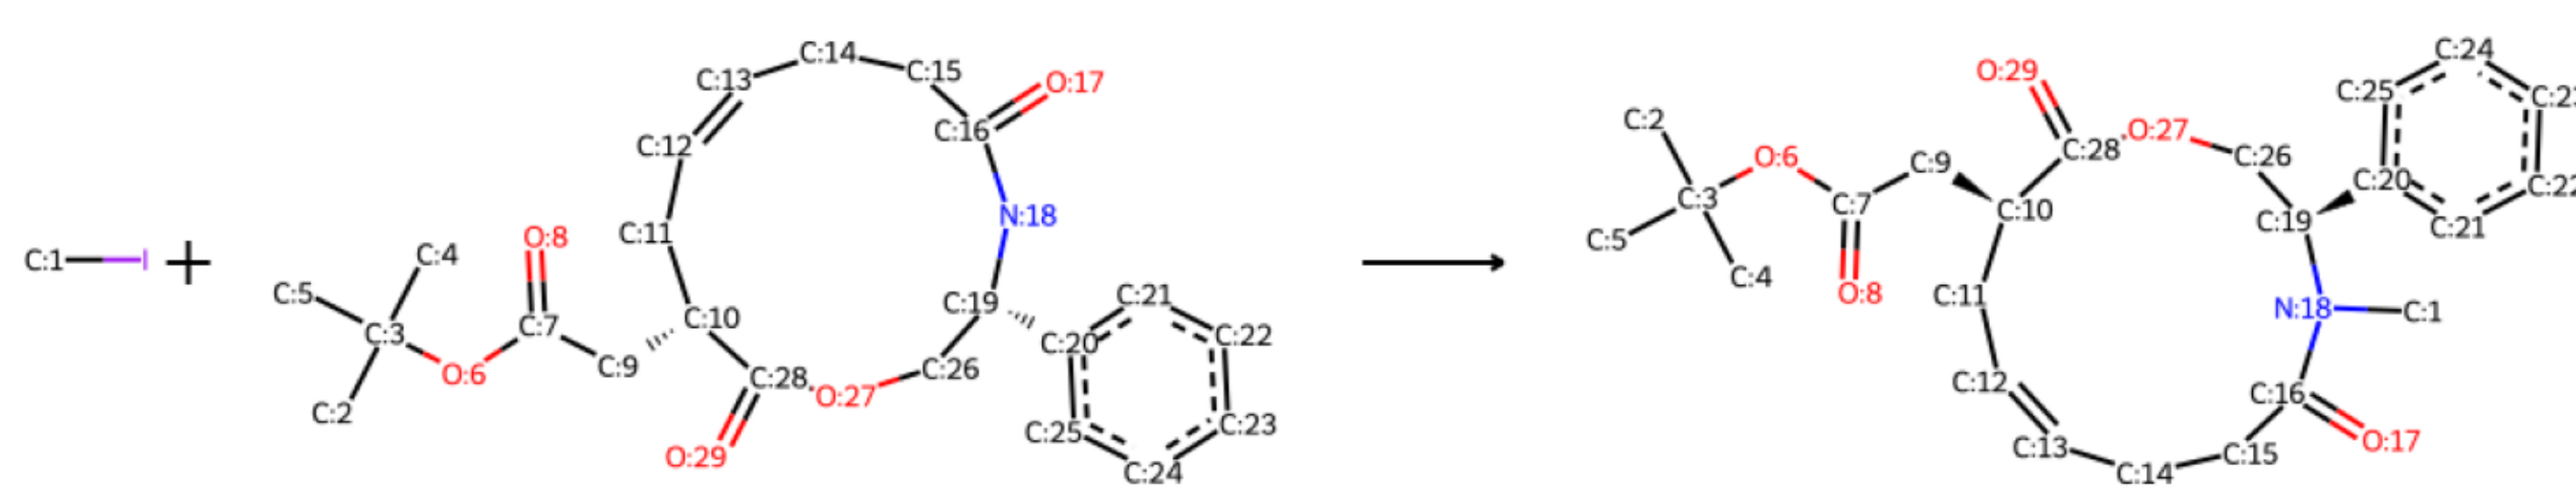

Identified mechanistic class -  
SN2 reaction

Reaction with missing reagents recovered

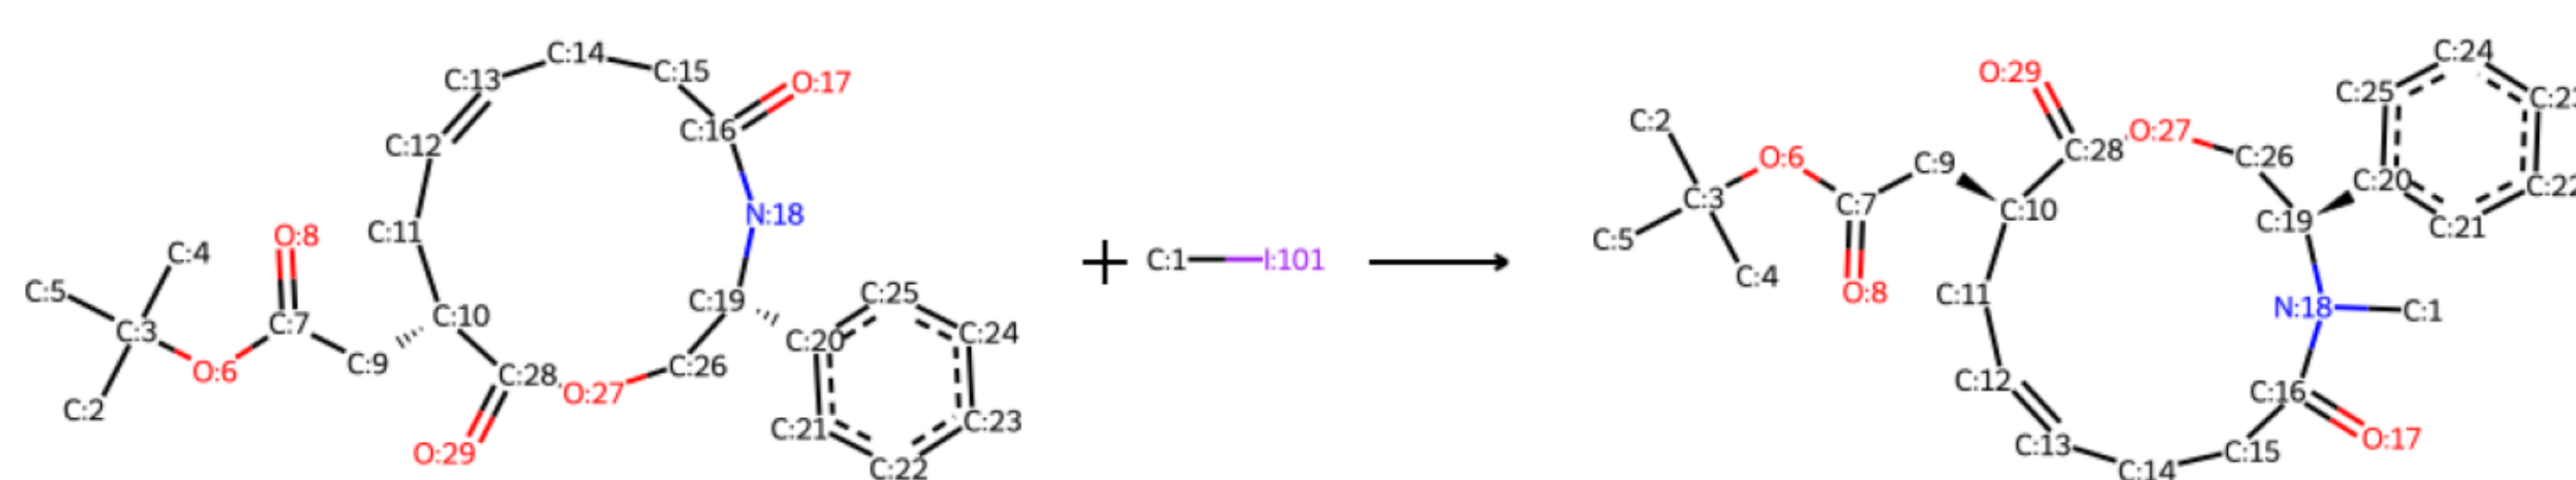

## Proposed mechanistic pathway

[Arrow order: (1) green, (2) blue, (3) red, (4) orange]

step #1

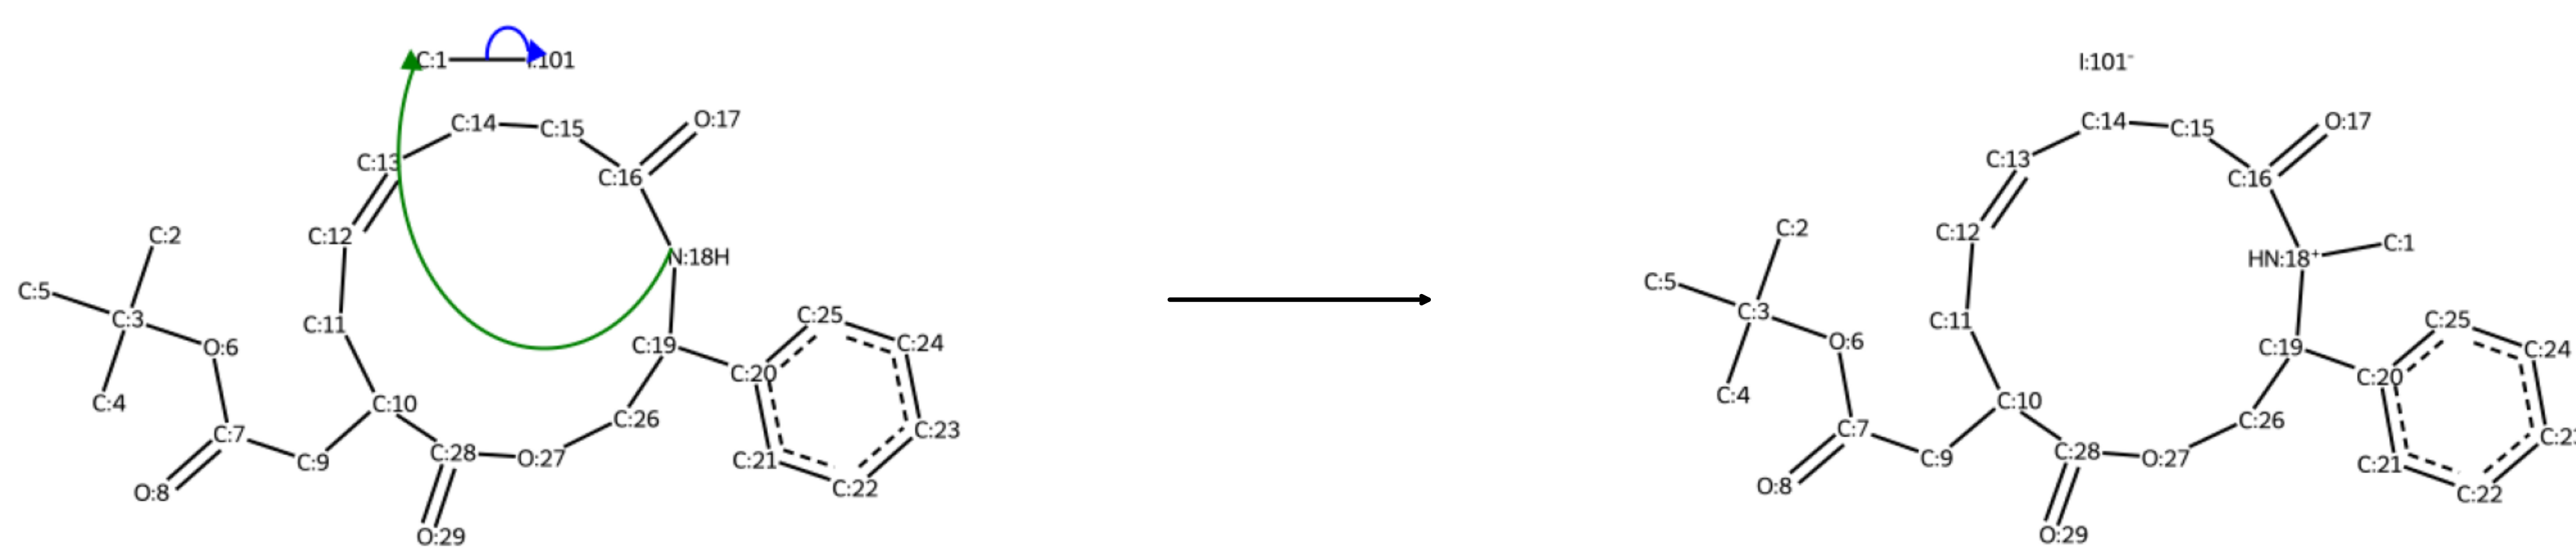

Product(s)

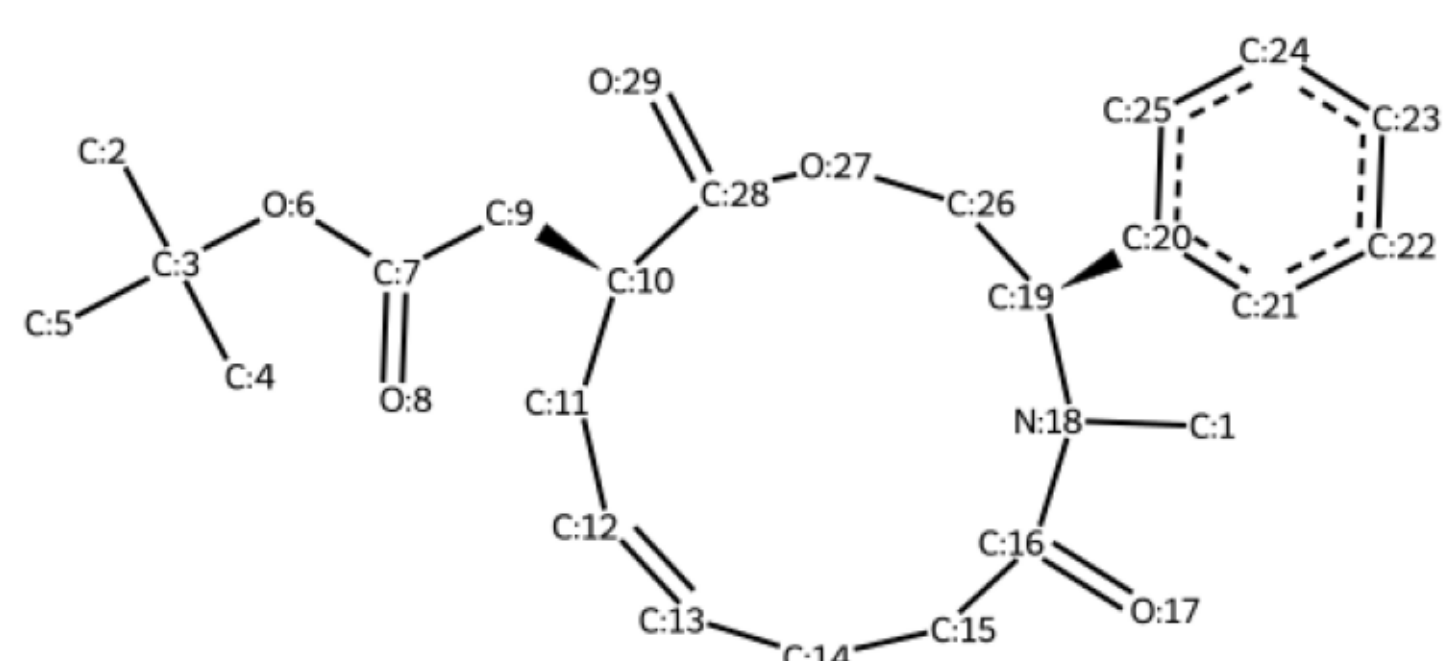



Original reaction  
sampled RXN\_ID:85)

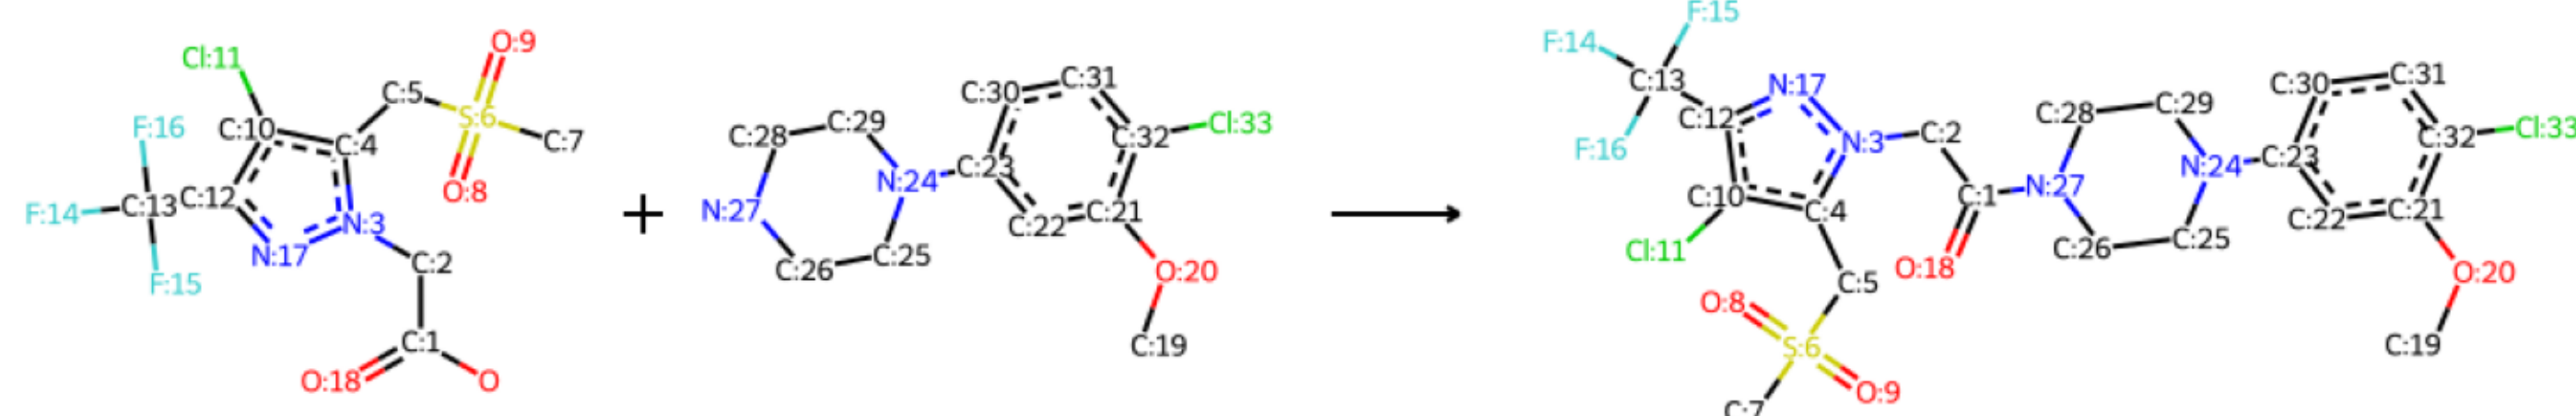

Identified mechanistic class -  
DCC\_condensation reaction

Reaction with missing reagents recovered

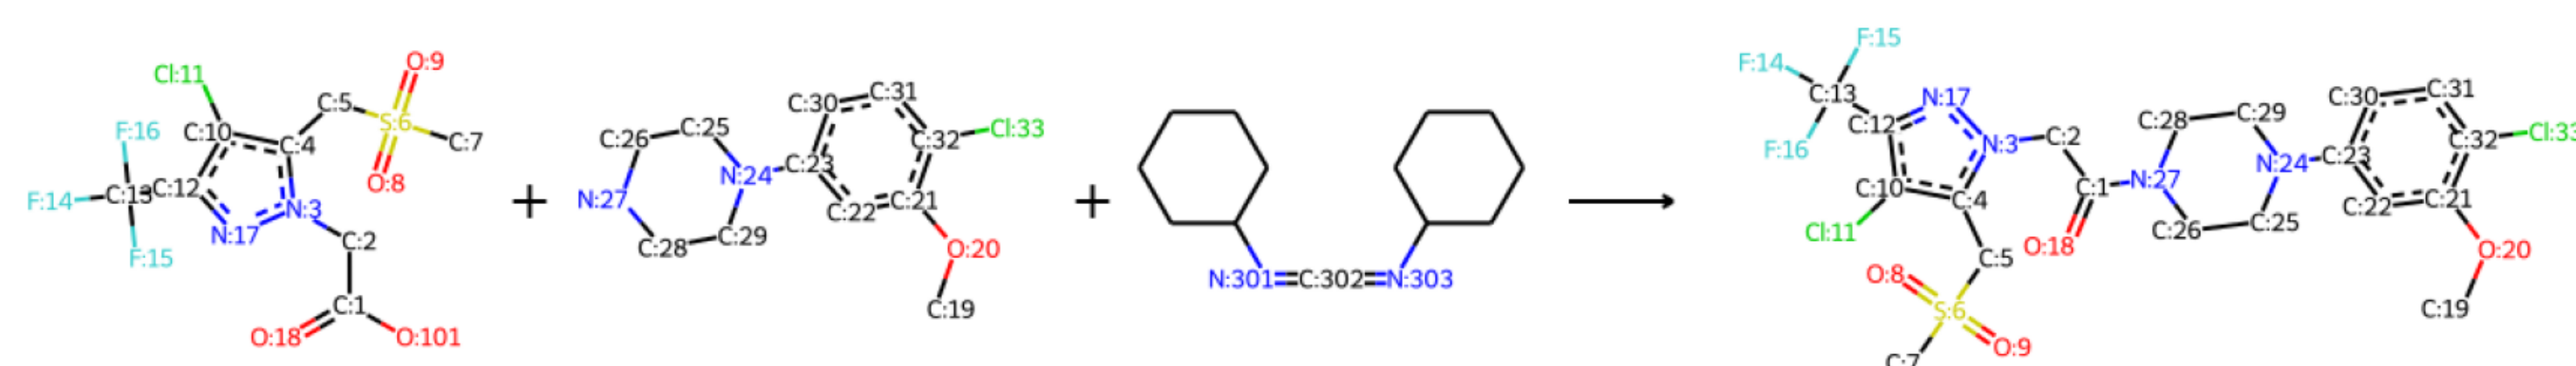

Proposed mechanistic pathway

[Arrow order: (1) green, (2) blue, (3) red, (4) orange]

step #1

step #2

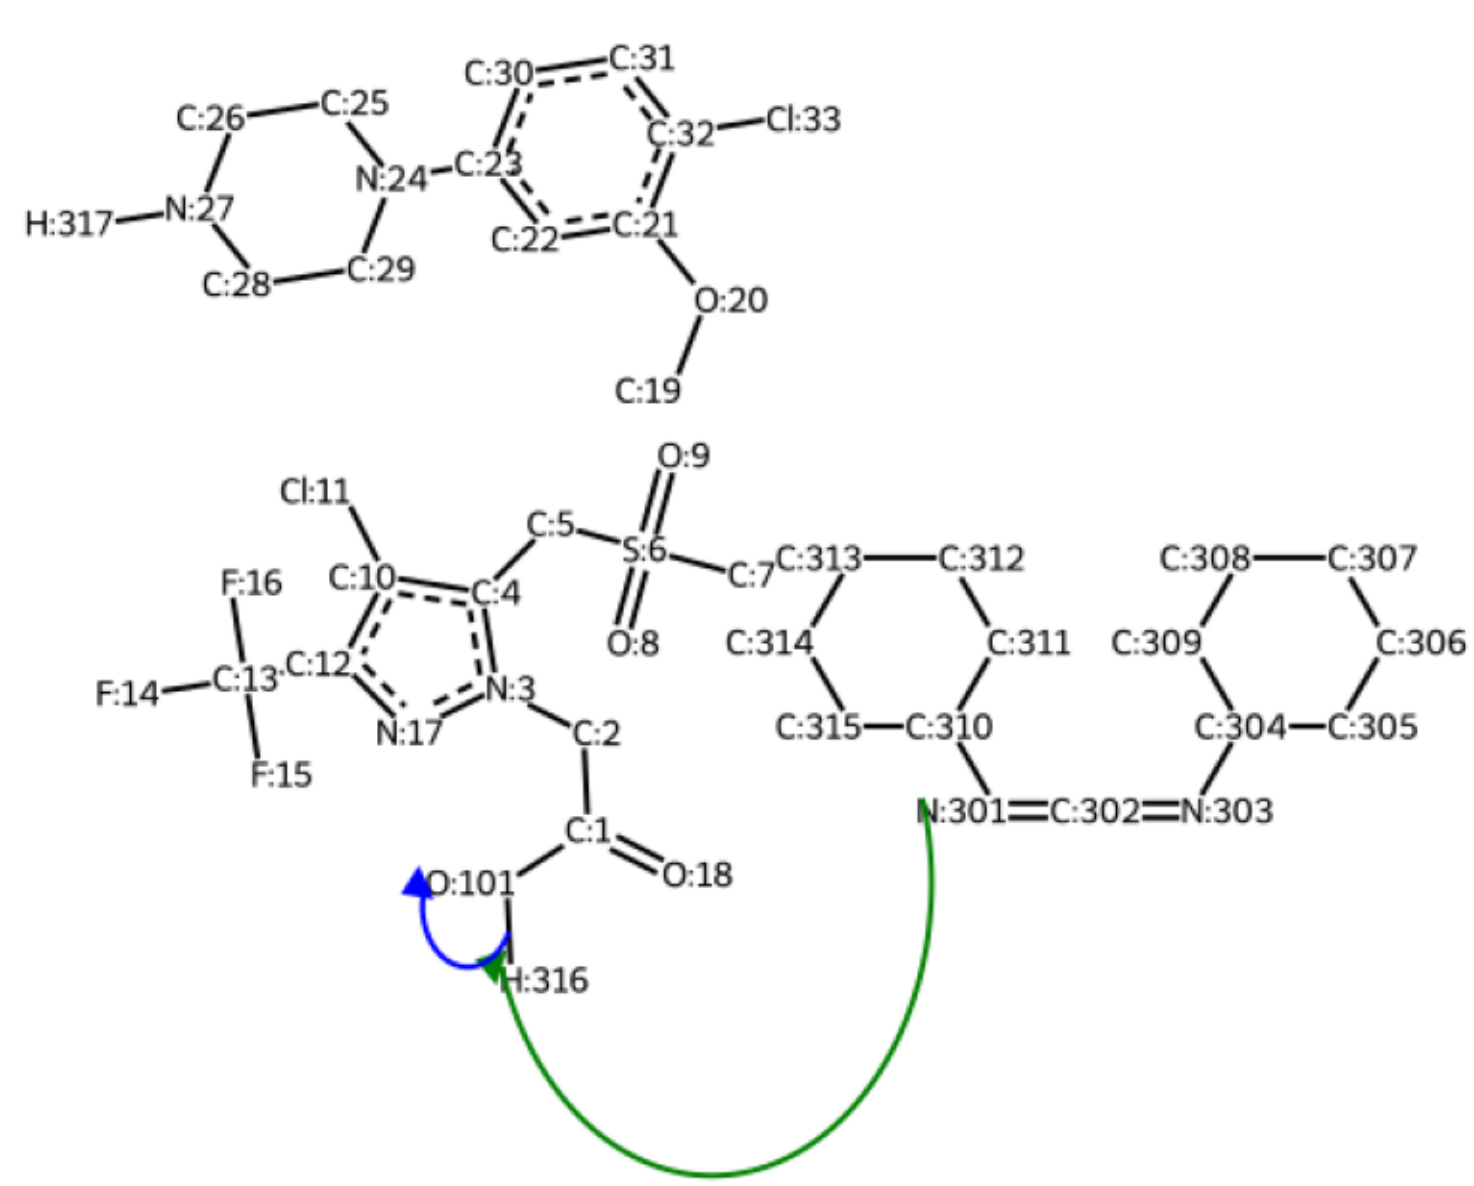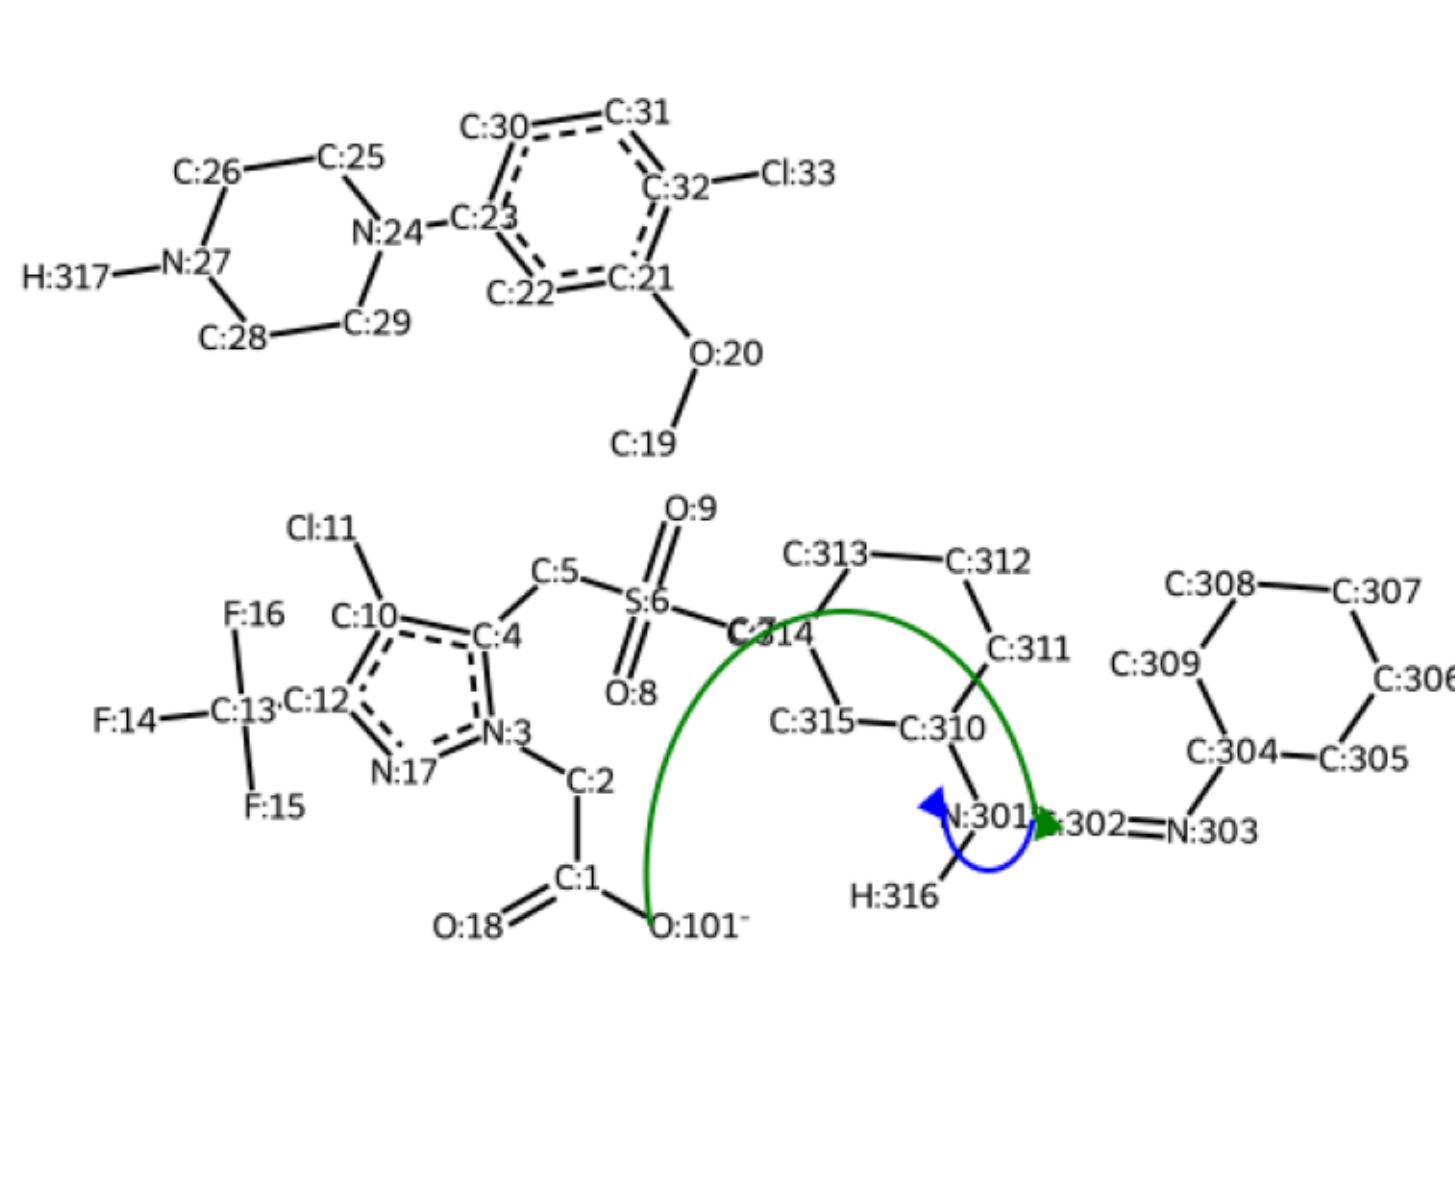

step #3

step #4

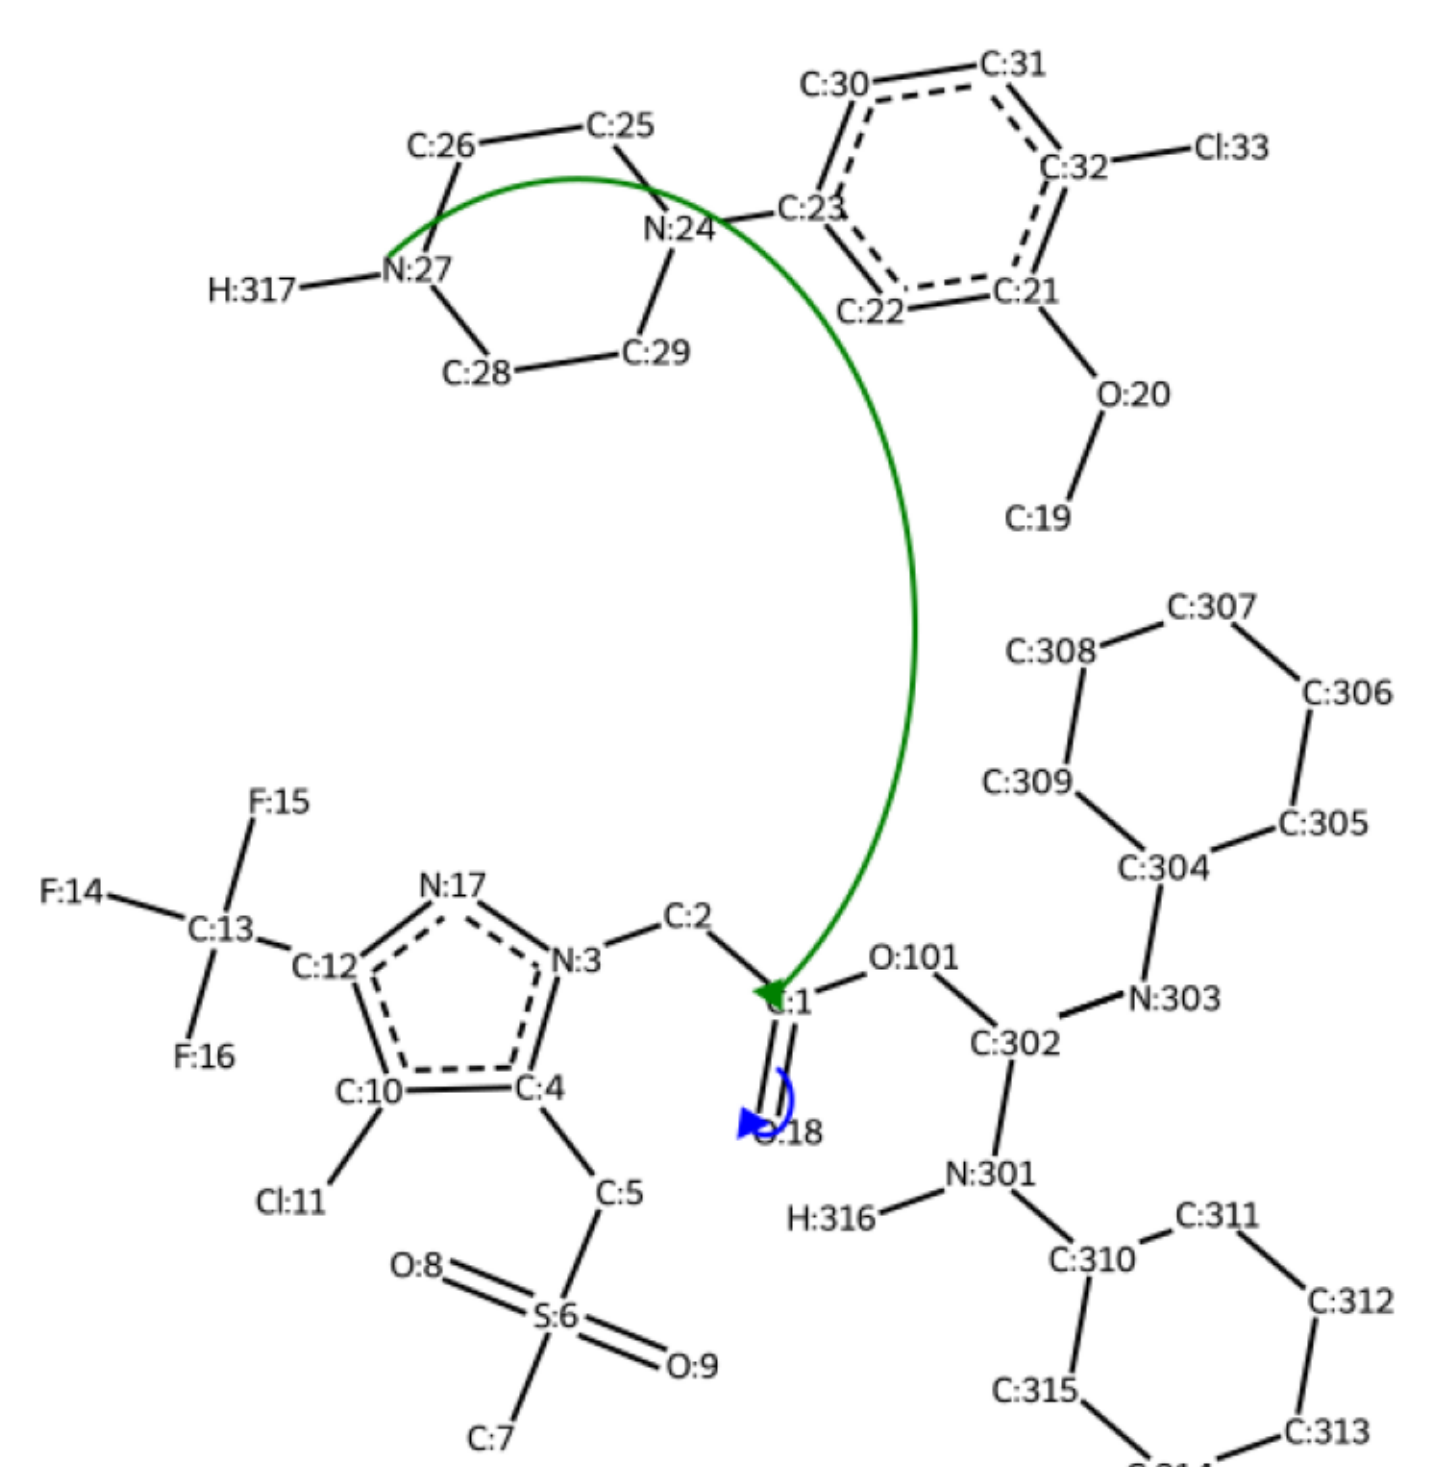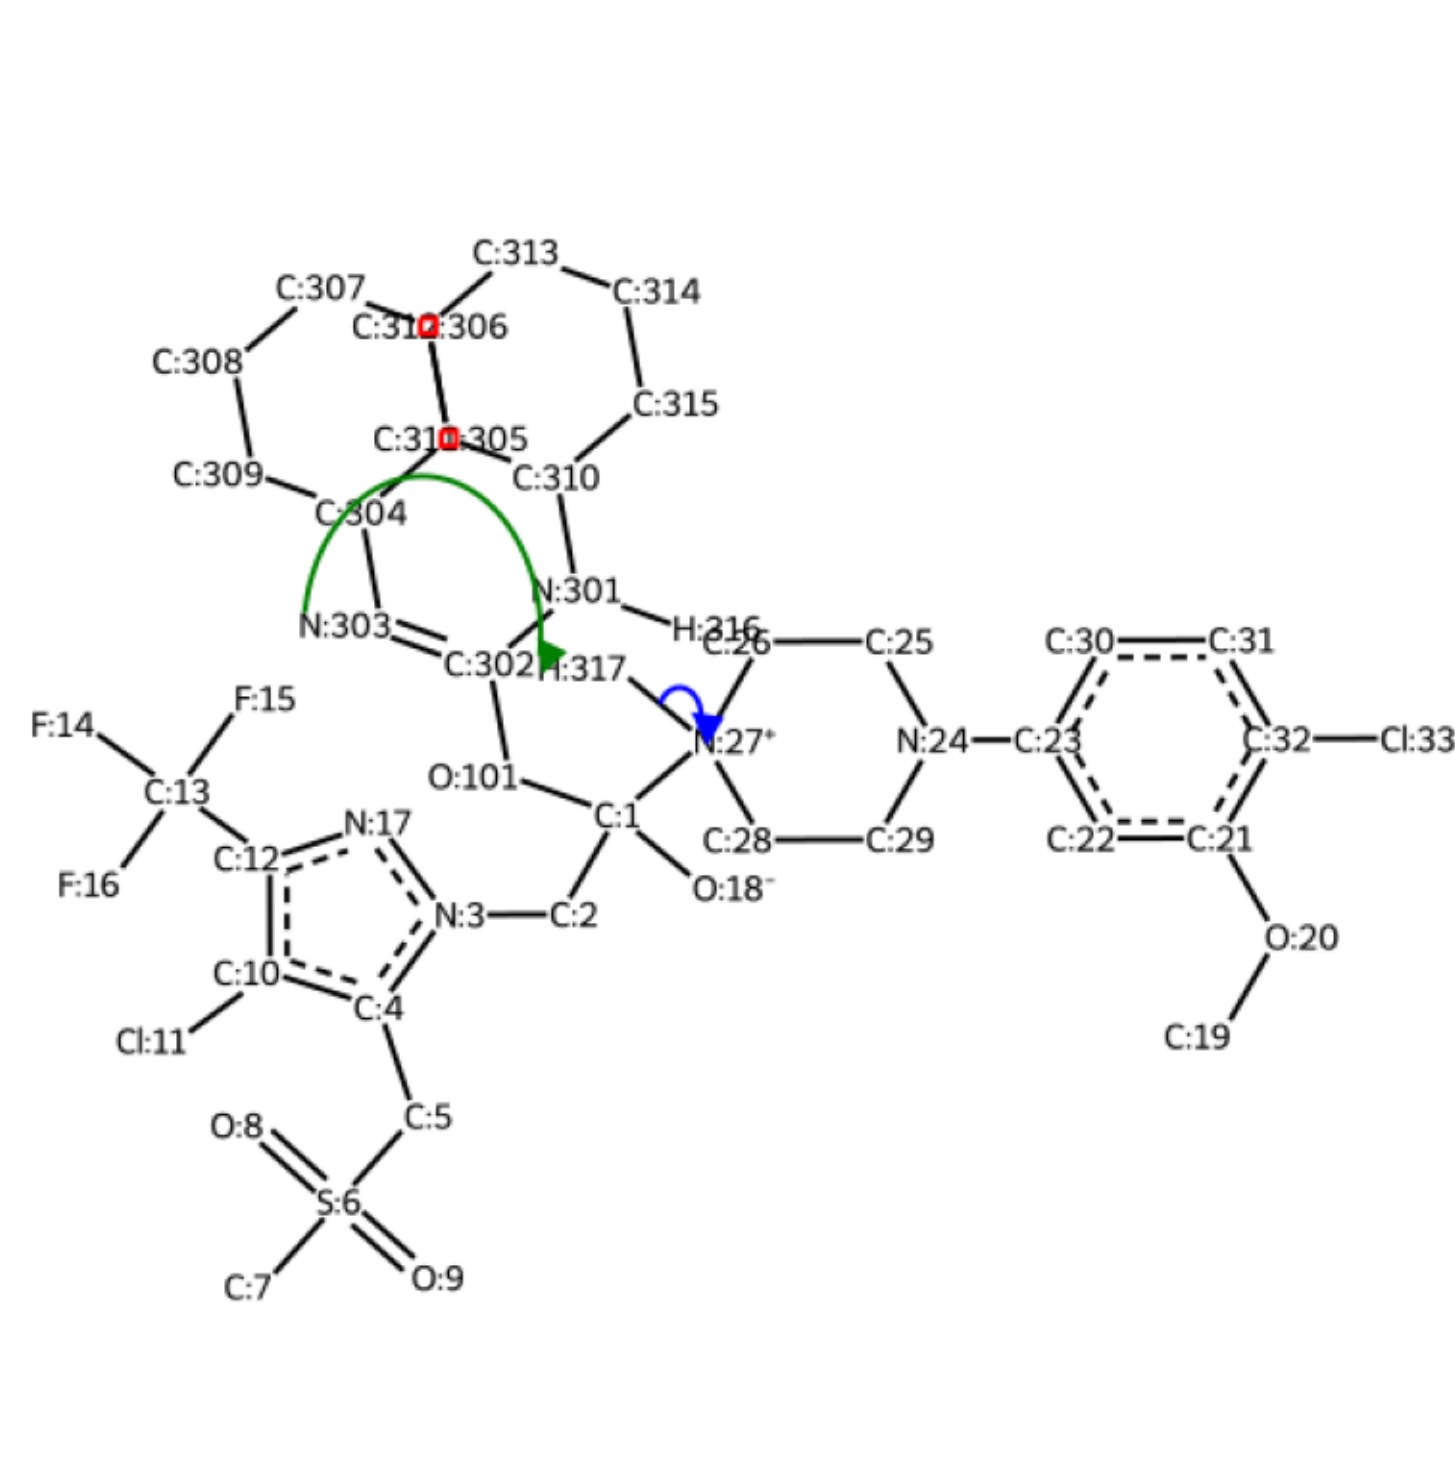

step #5

step #6

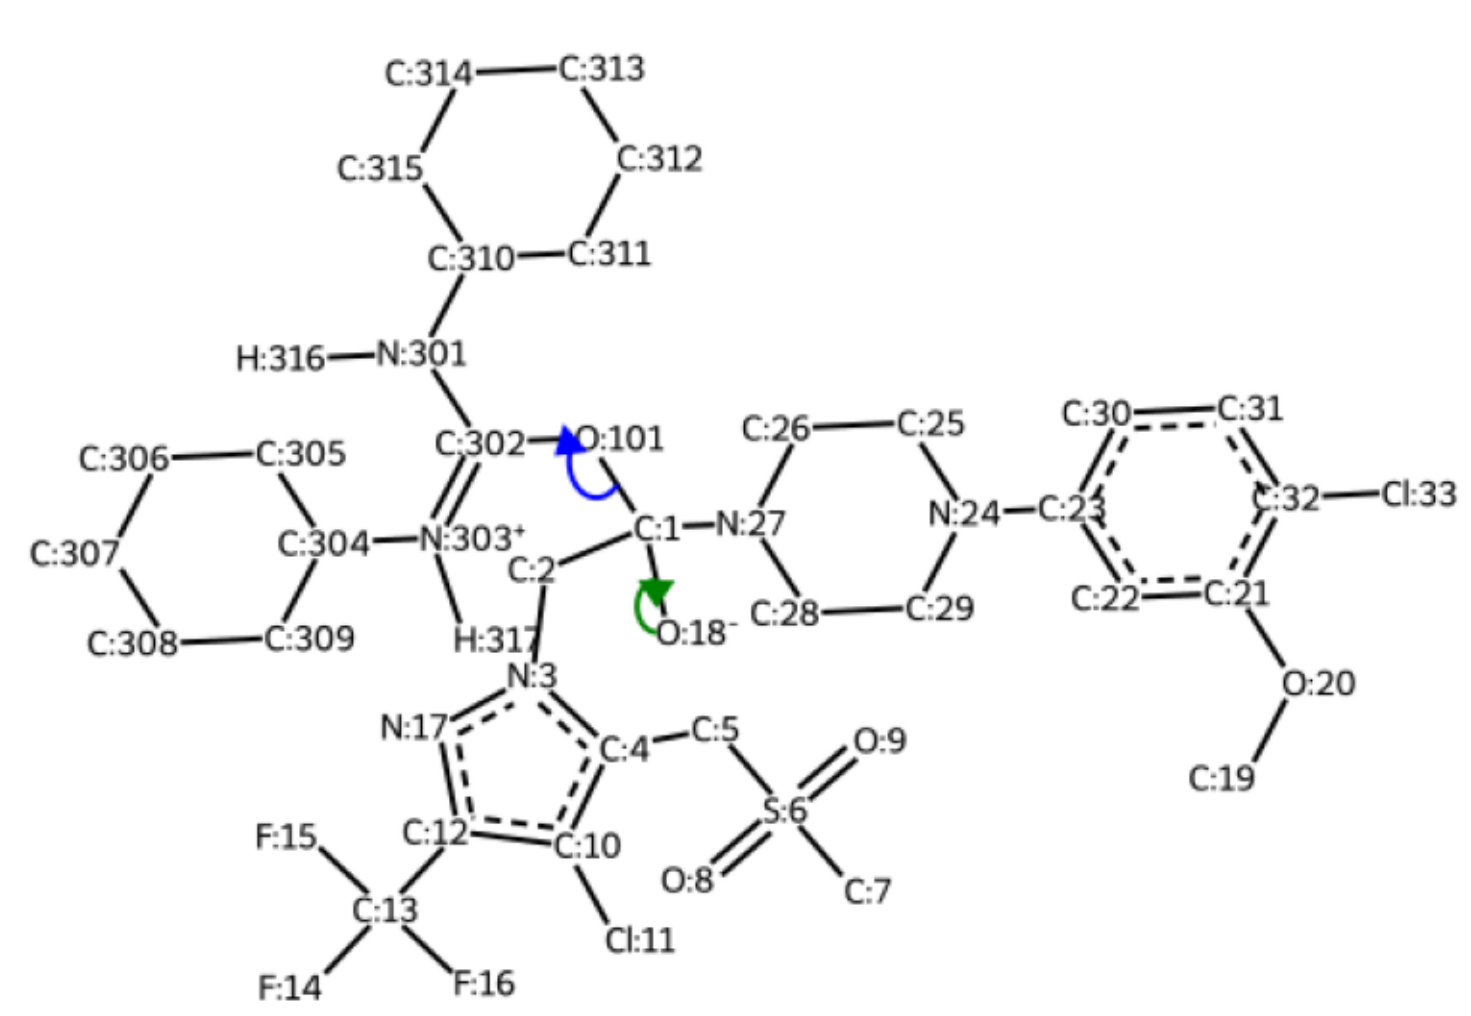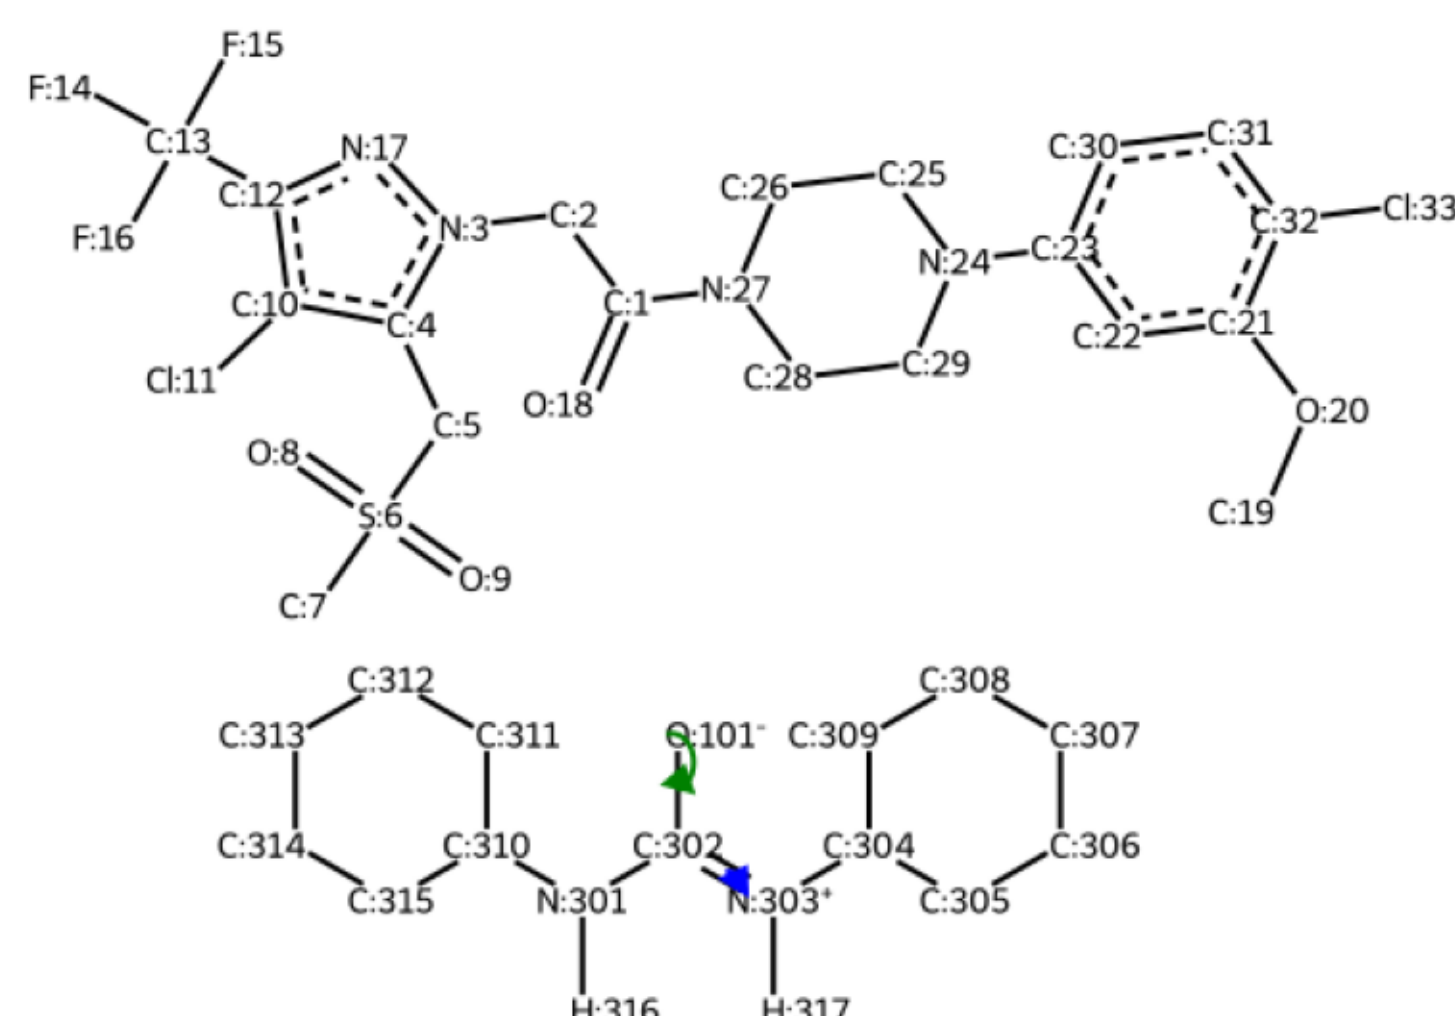

Product(s)

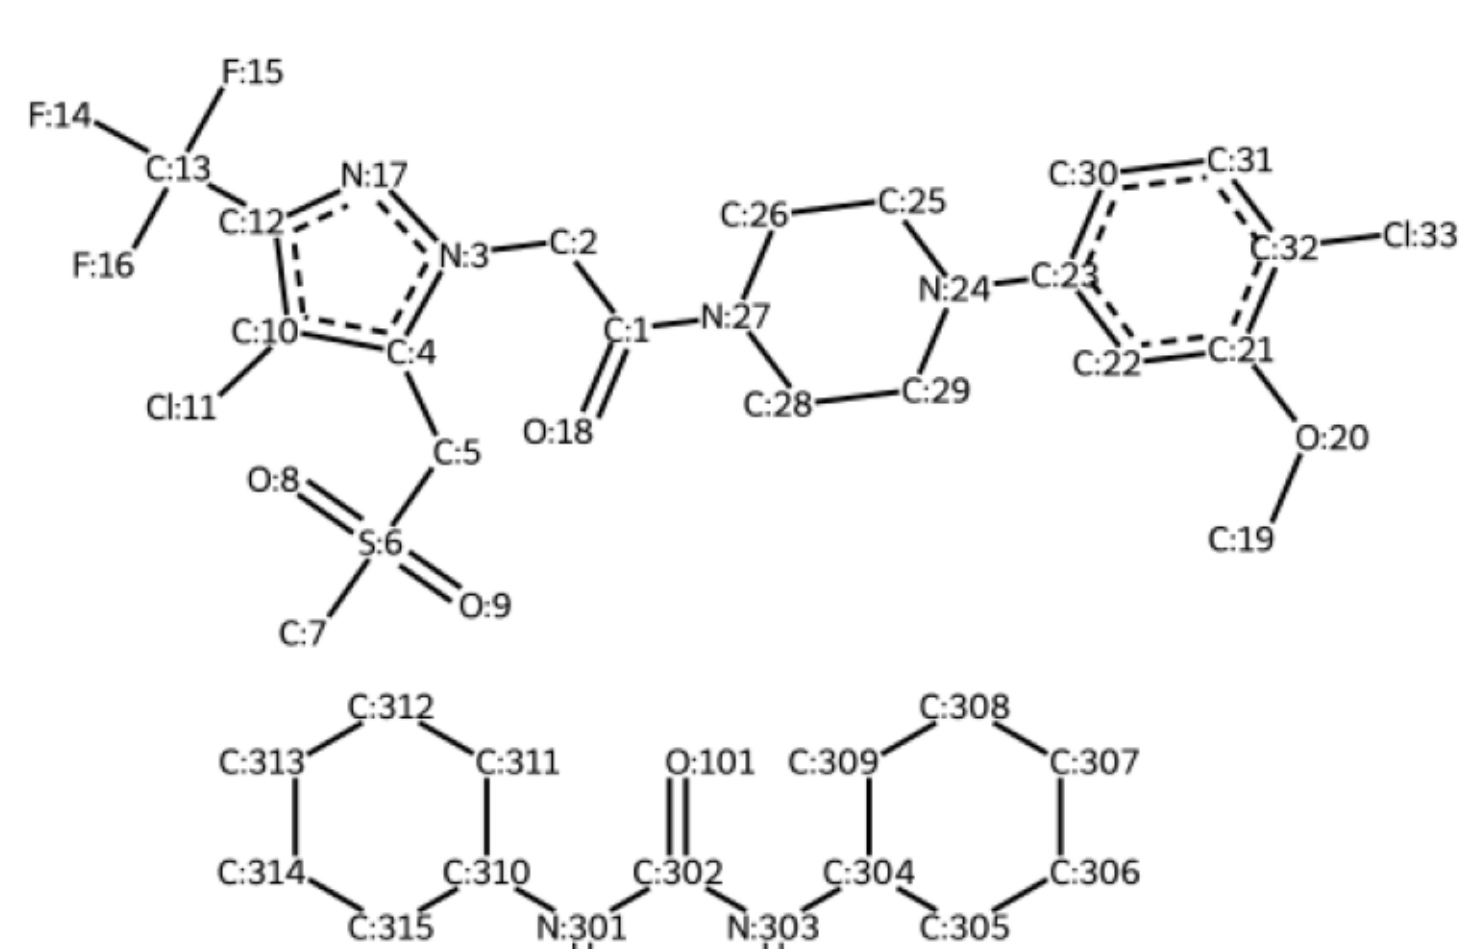



Original reaction  
sampled RXN\_ID:86)

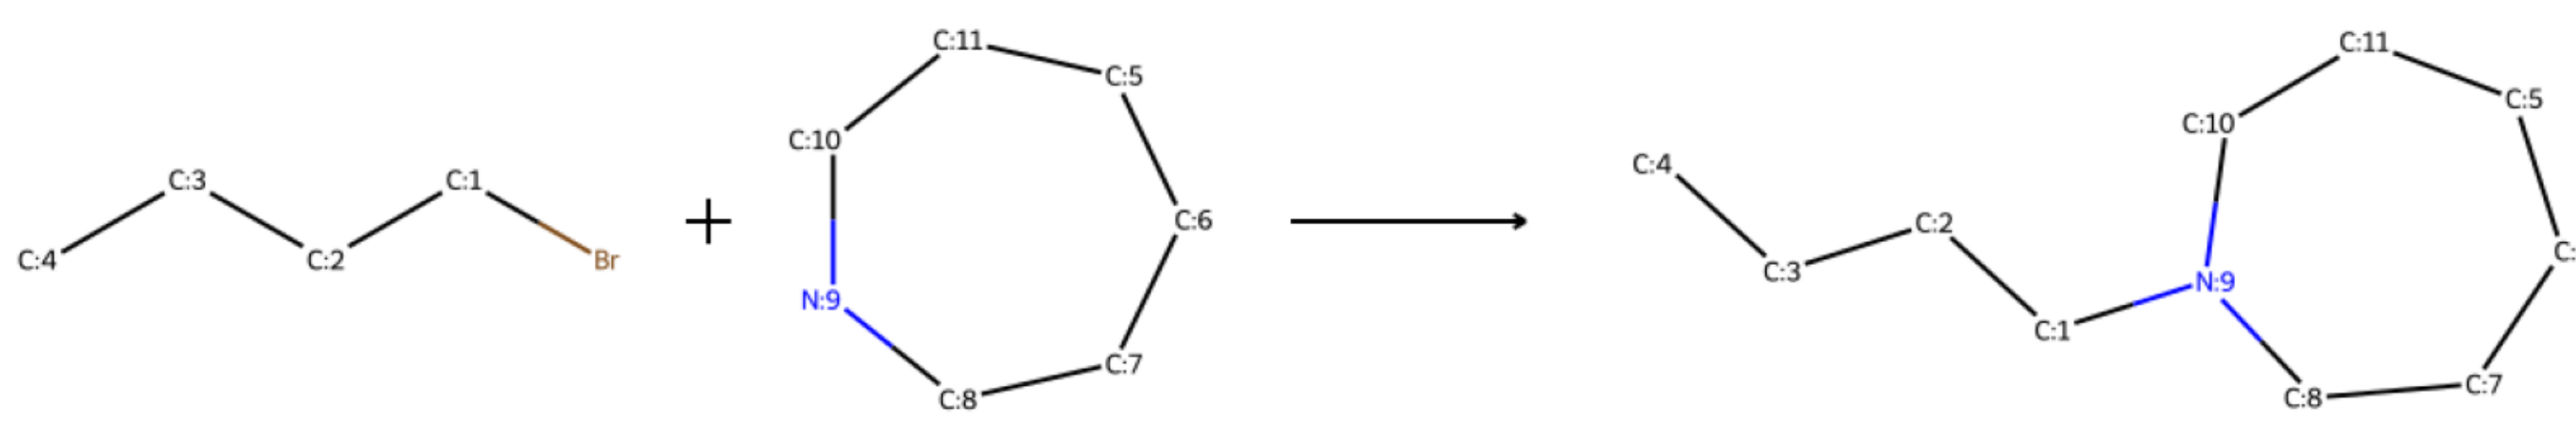

Identified mechanistic class -  
SN2 reaction

Reaction with missing reagents recovered

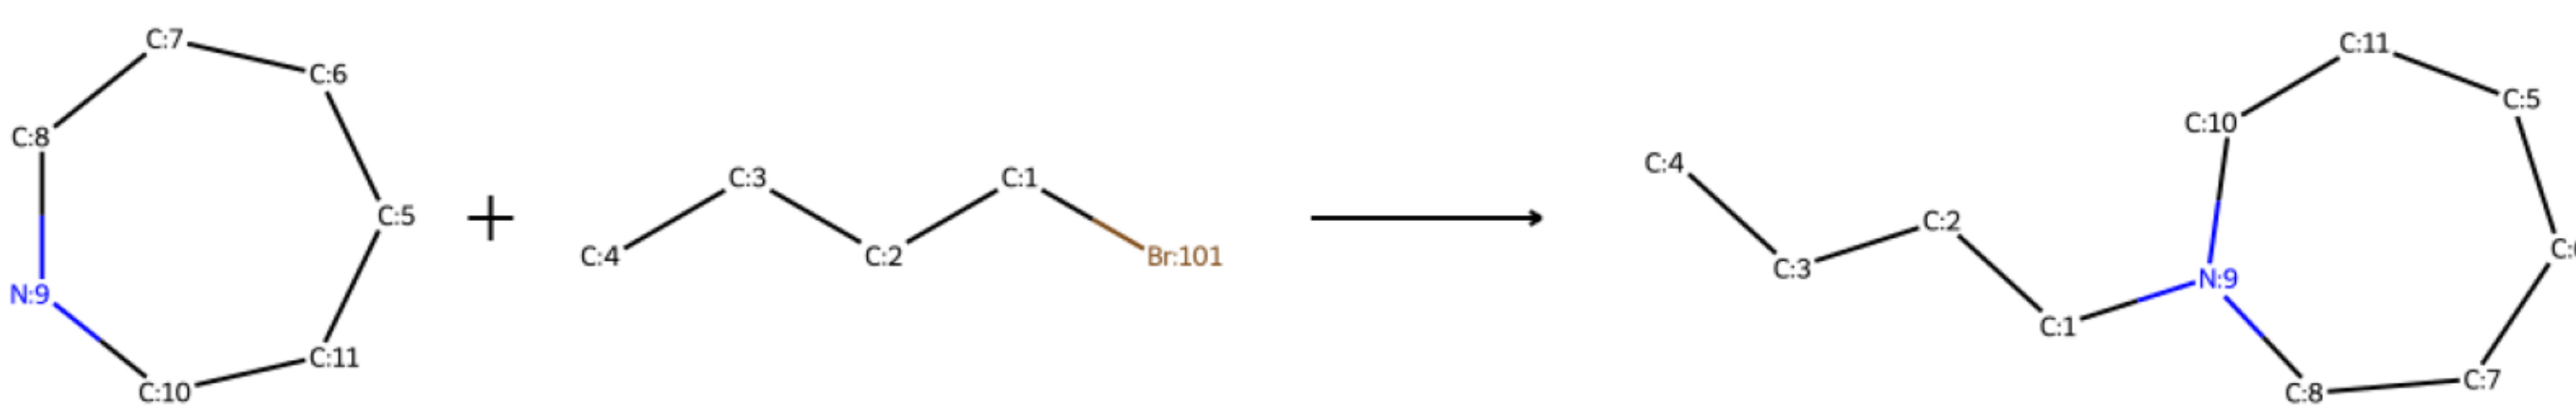

Proposed mechanistic pathway

[Arrow order: (1) green, (2) blue, (3) red, (4) orange]

step #1

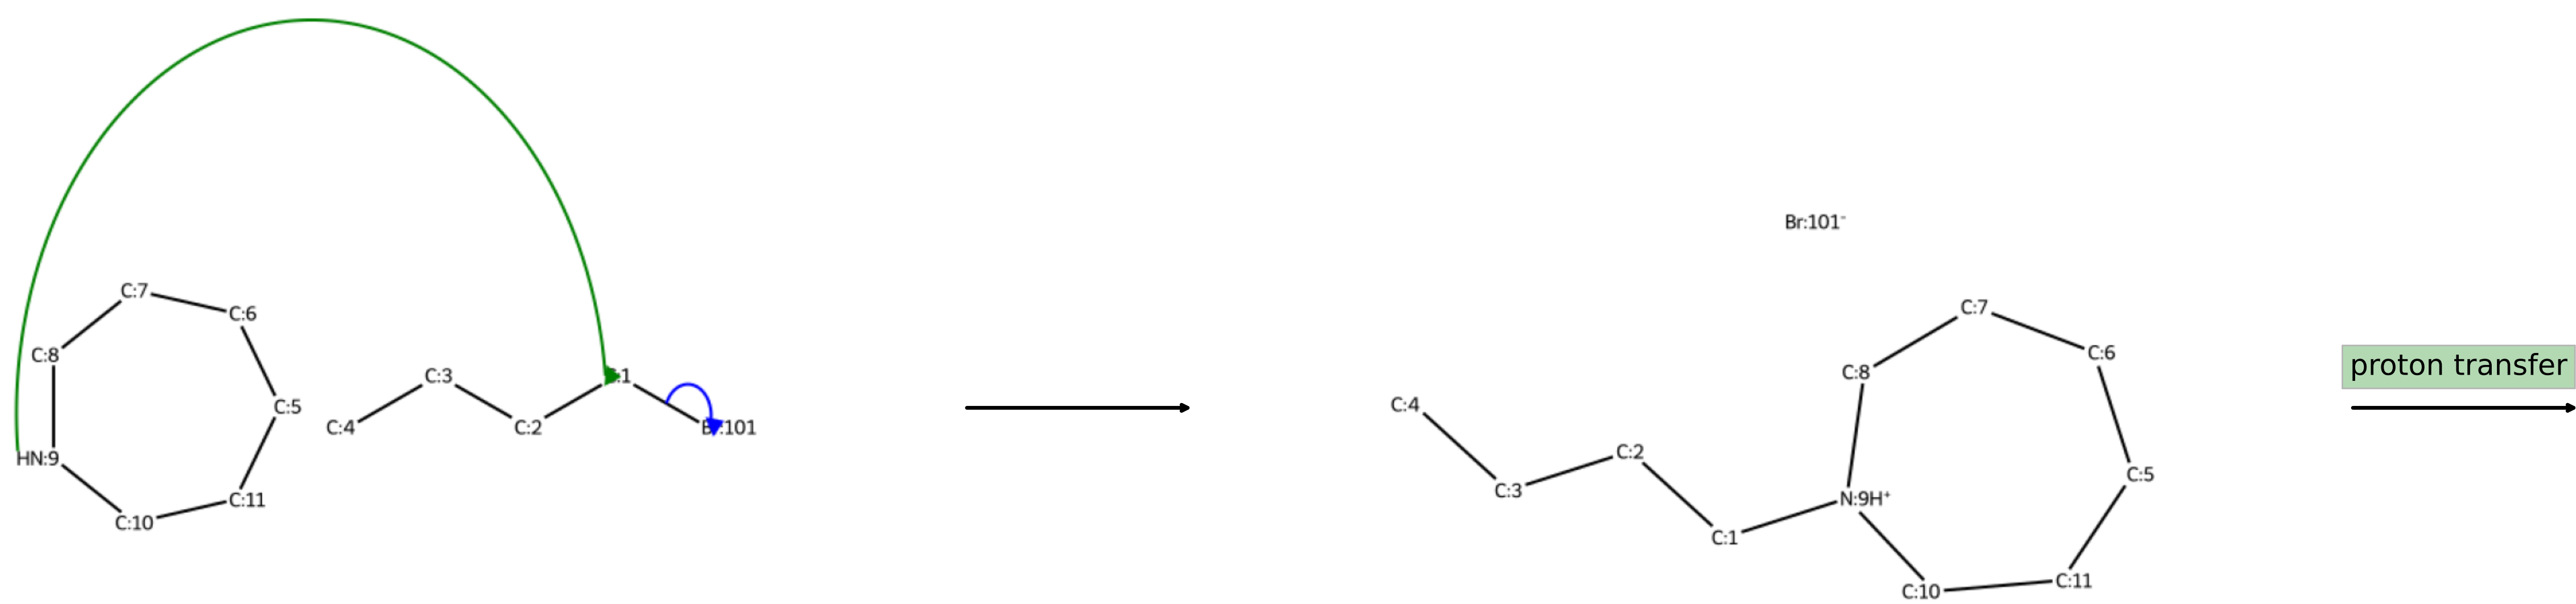

Product(s)

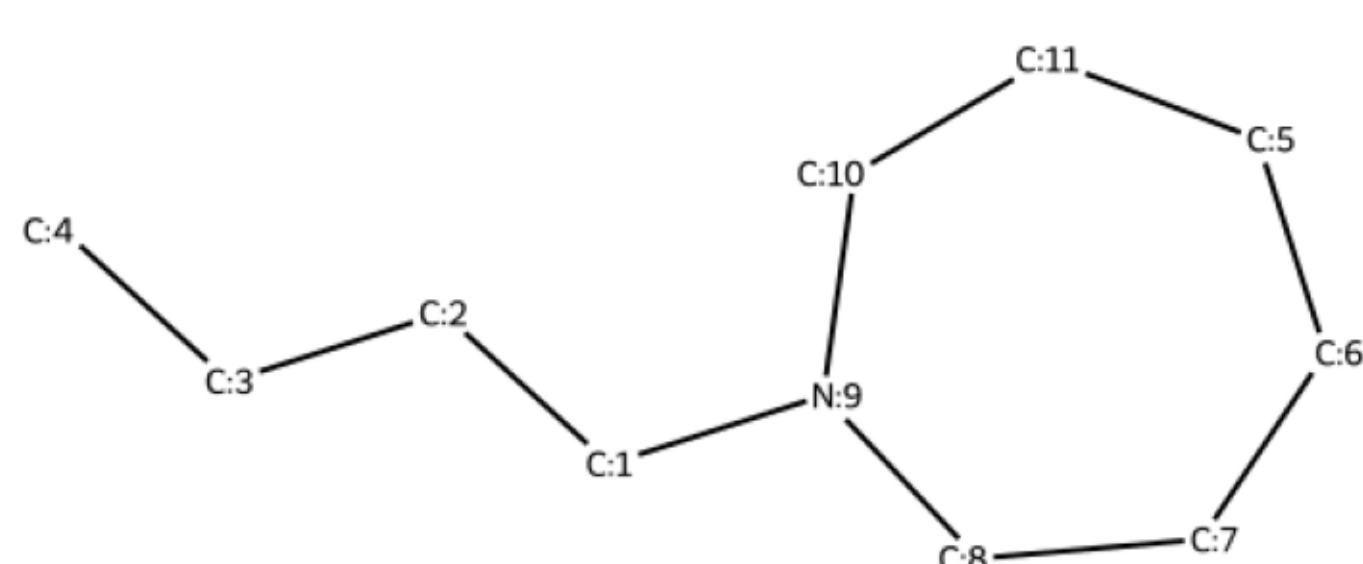

Original reaction  
sampled RXN\_ID:87)

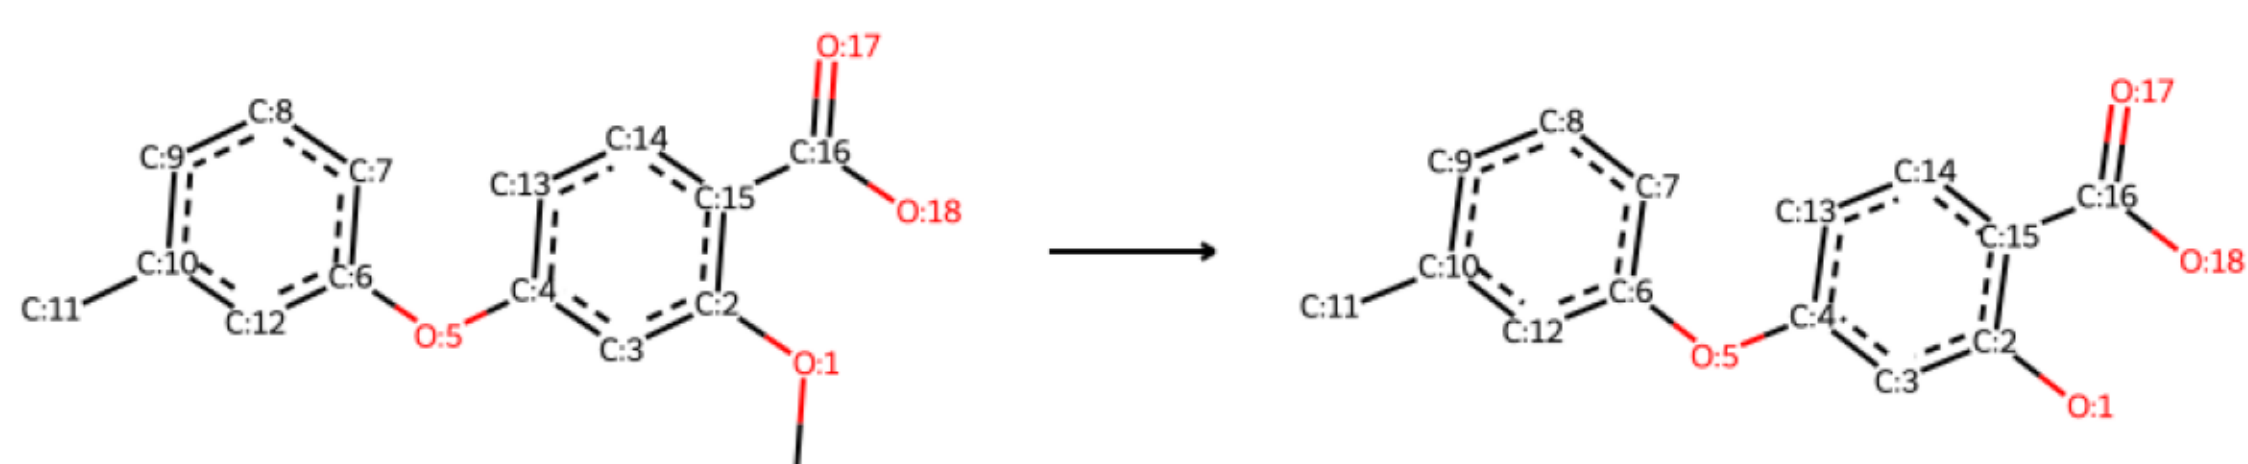

Identified mechanistic class -  
O\_demethylation reaction

Reaction with missing reagents recovered

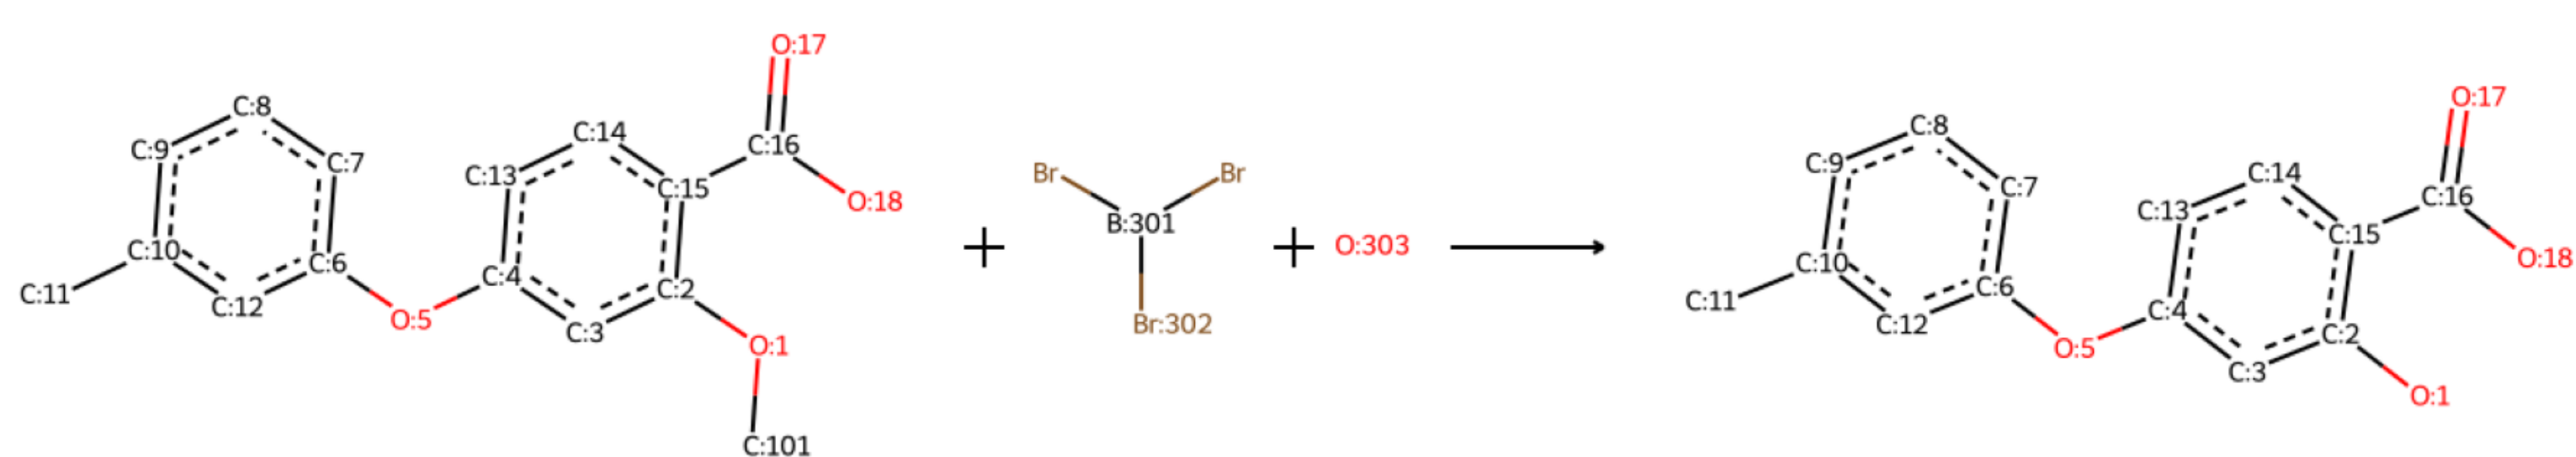

Proposed mechanistic pathway

[Arrow order: (1) green, (2) blue, (3) red, (4) orange]

step #1

step #2

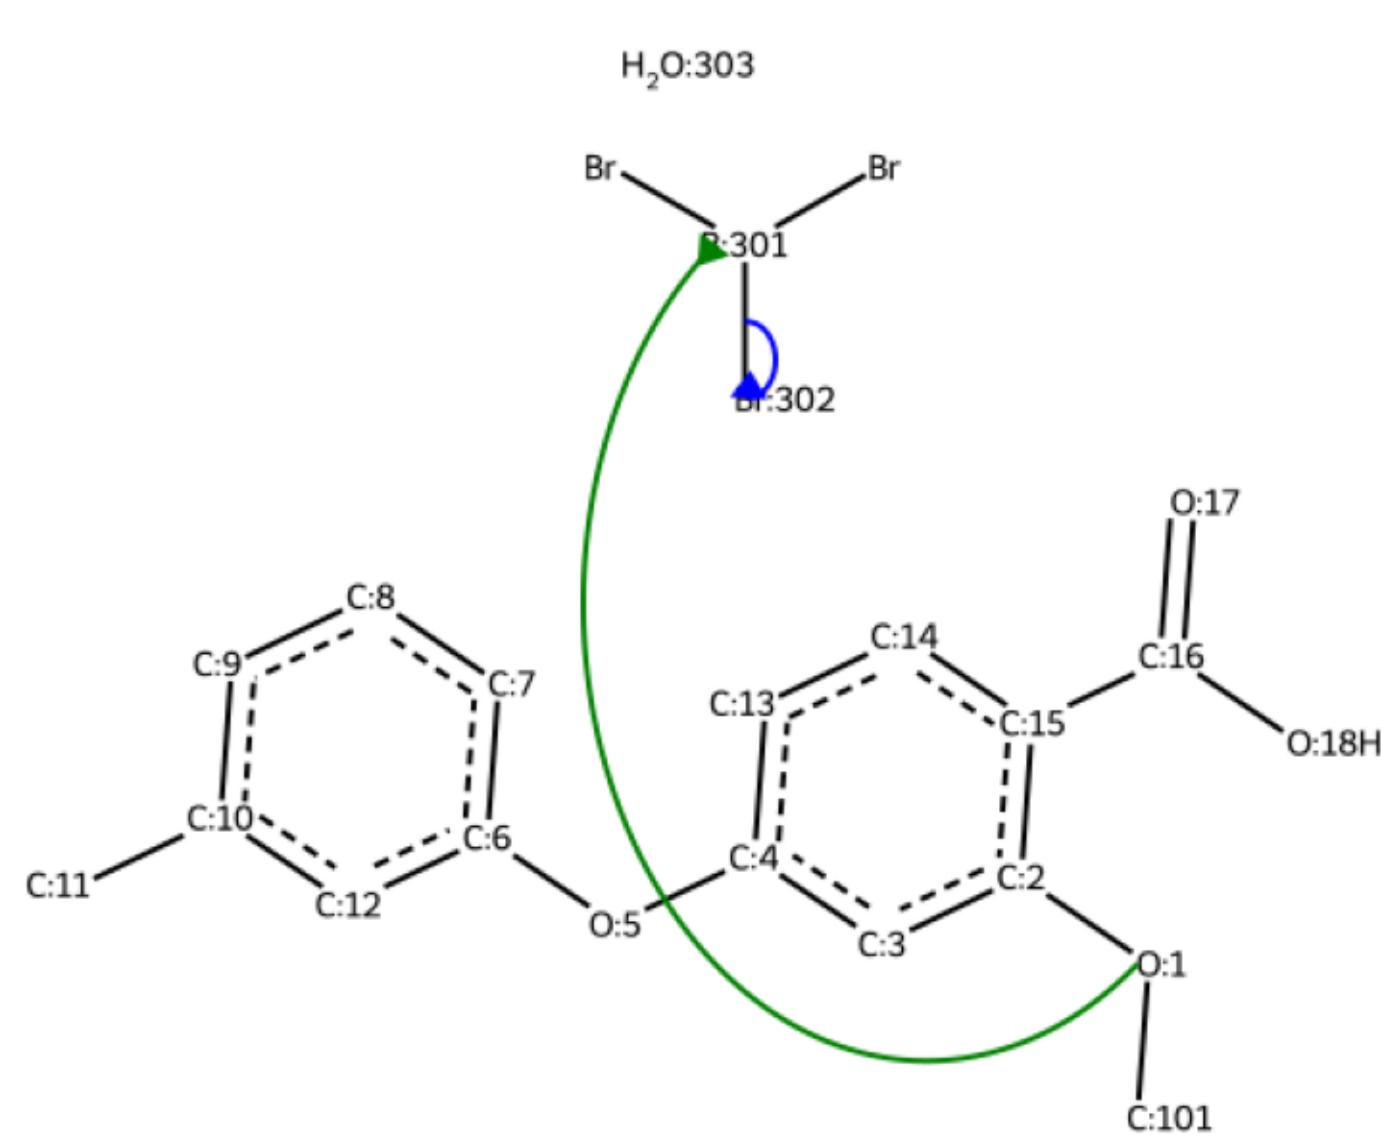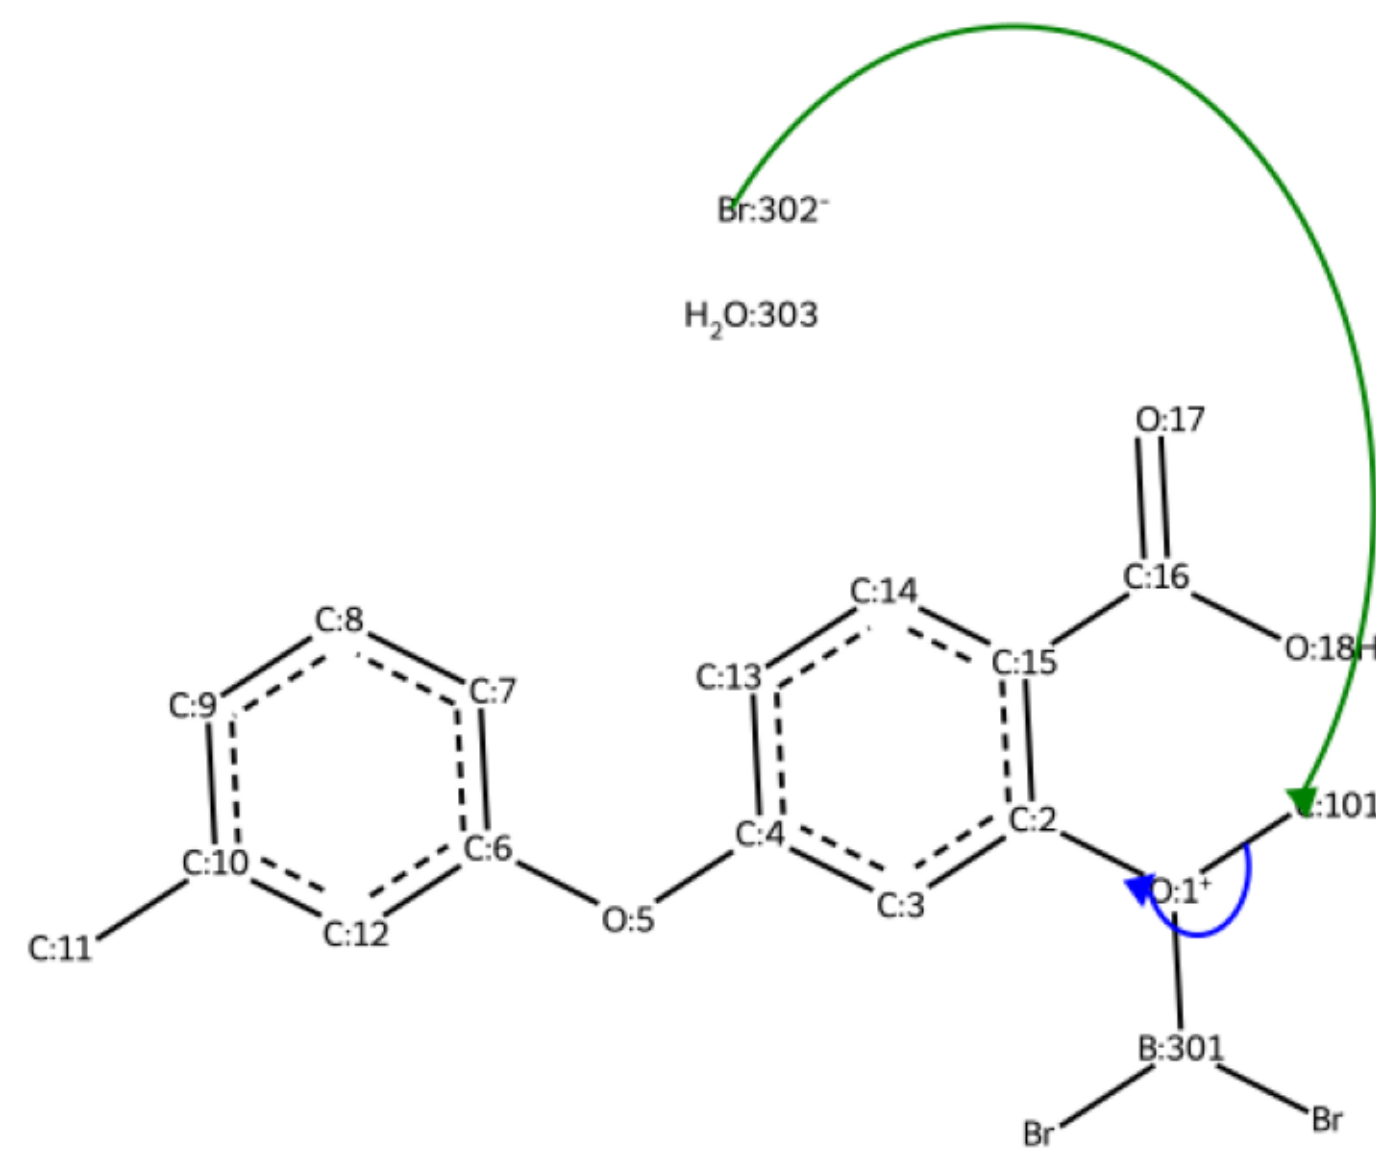

step #3

Product(s)

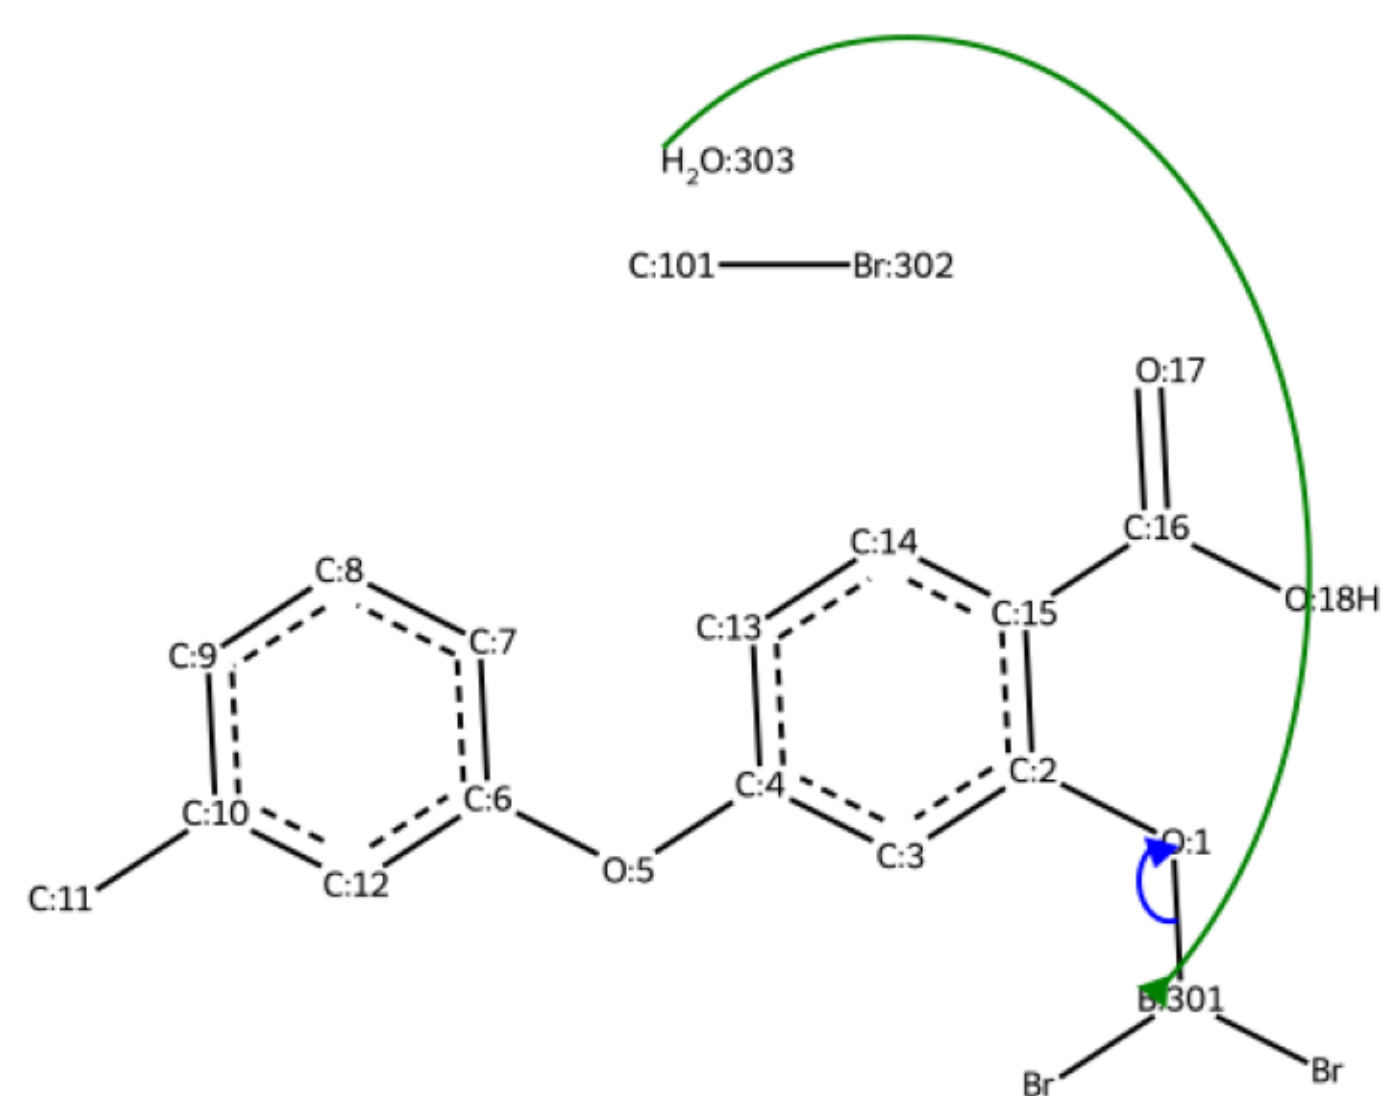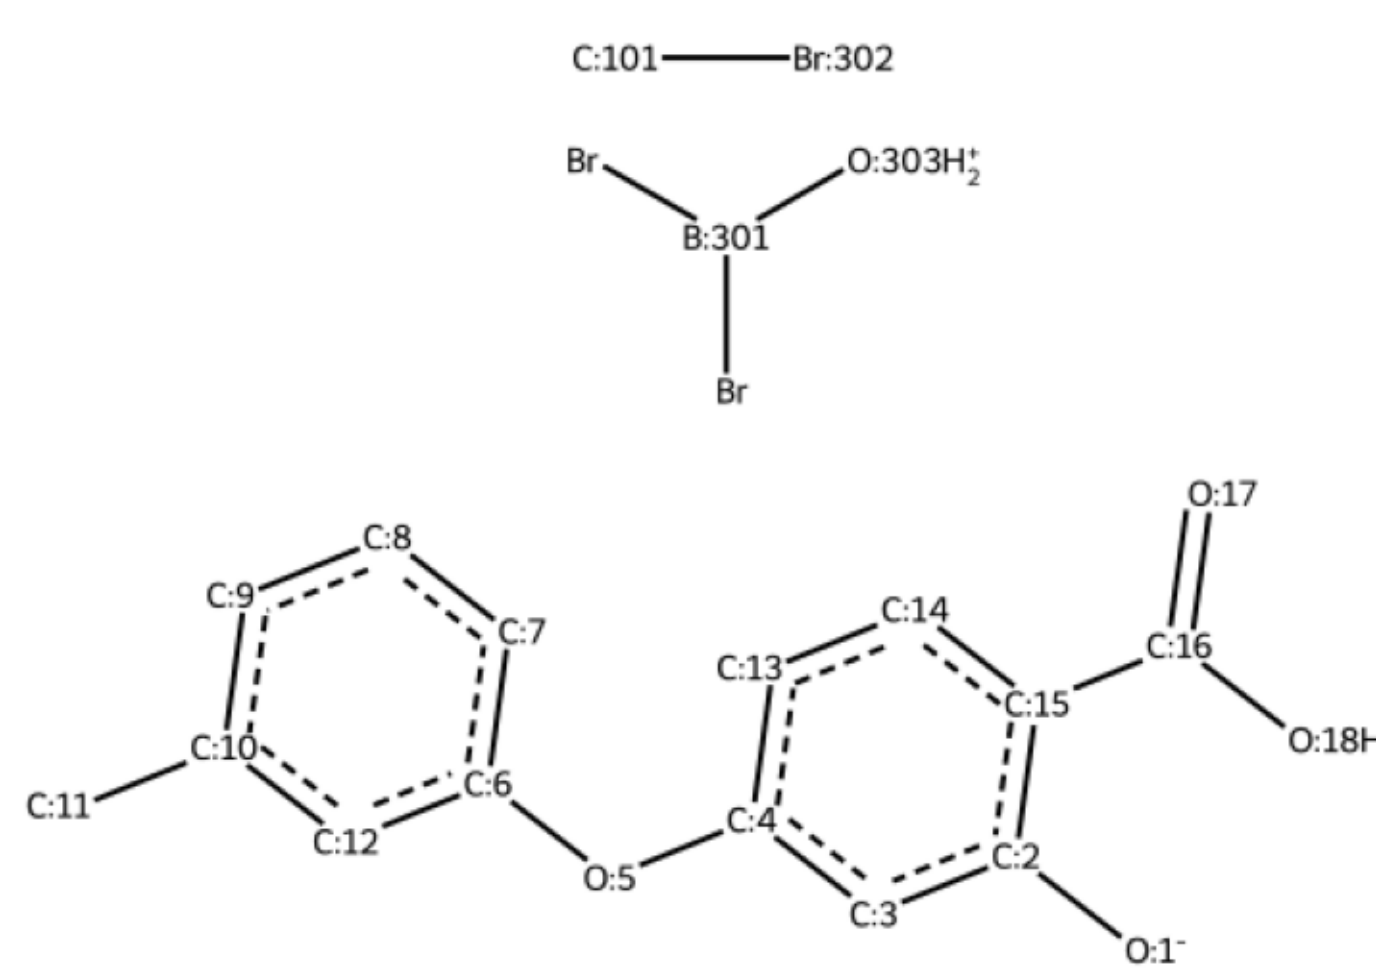



Original reaction  
sampled RXN\_ID:88)

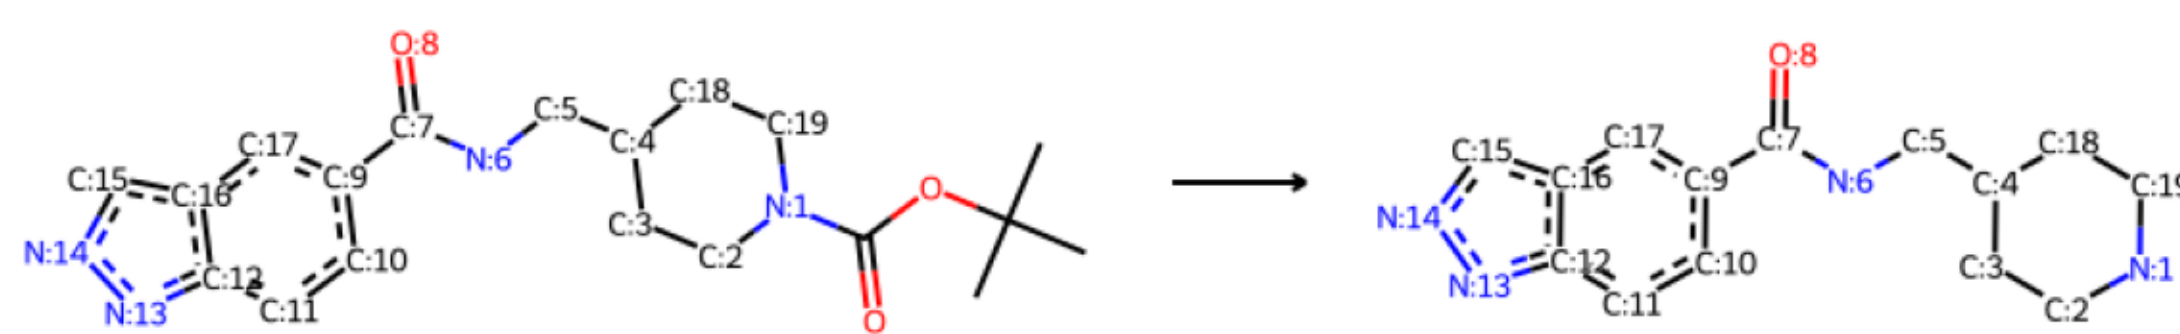

Identified mechanistic class -  
Boc\_deprotection reaction

Reaction with missing reagents recovered

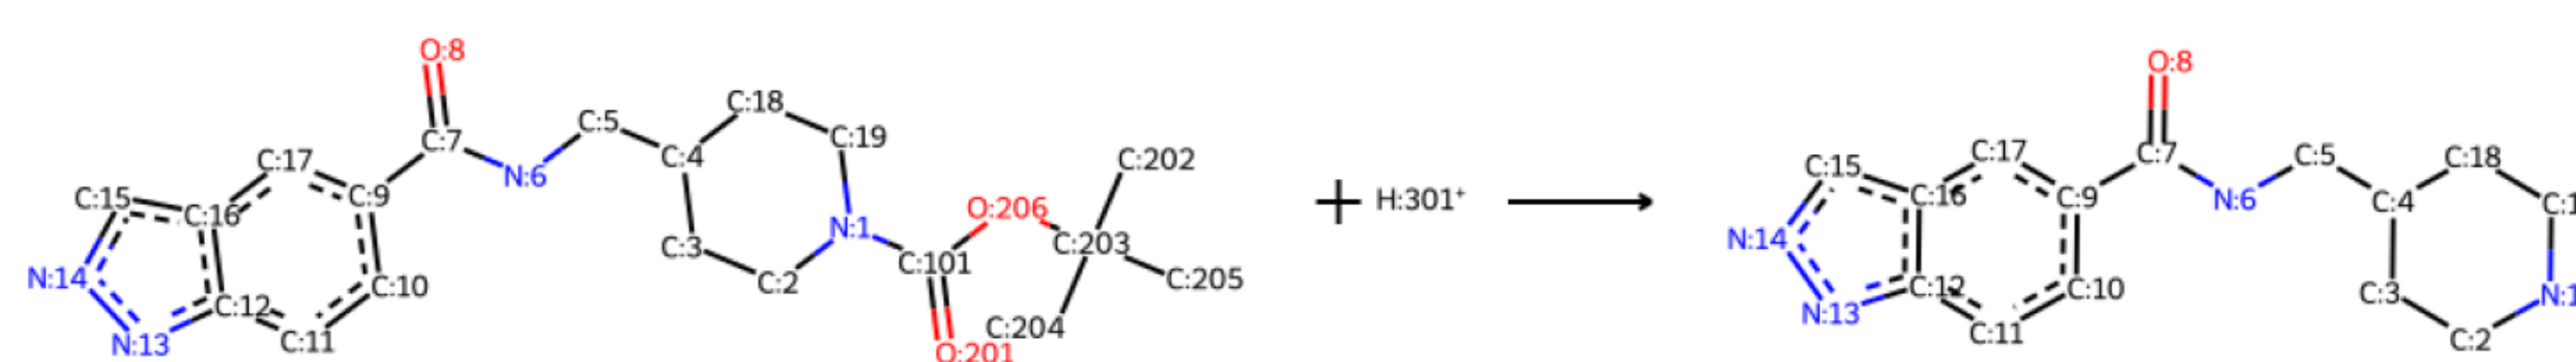

Proposed mechanistic pathway

[Arrow order: (1) green, (2) blue, (3) red, (4) orange]

step #1

step #2

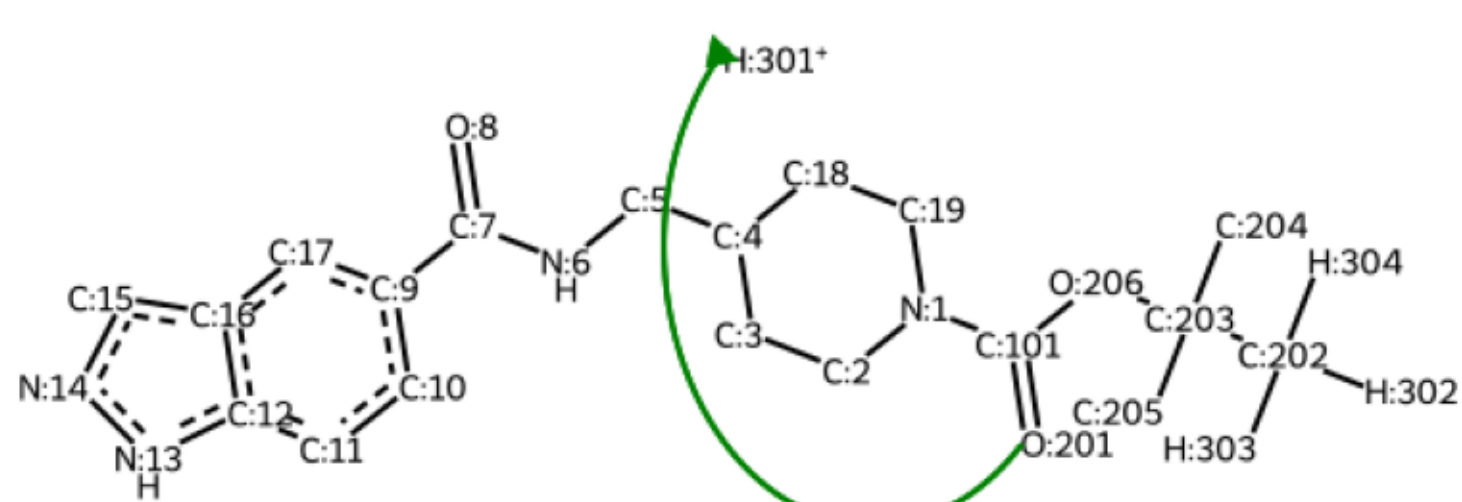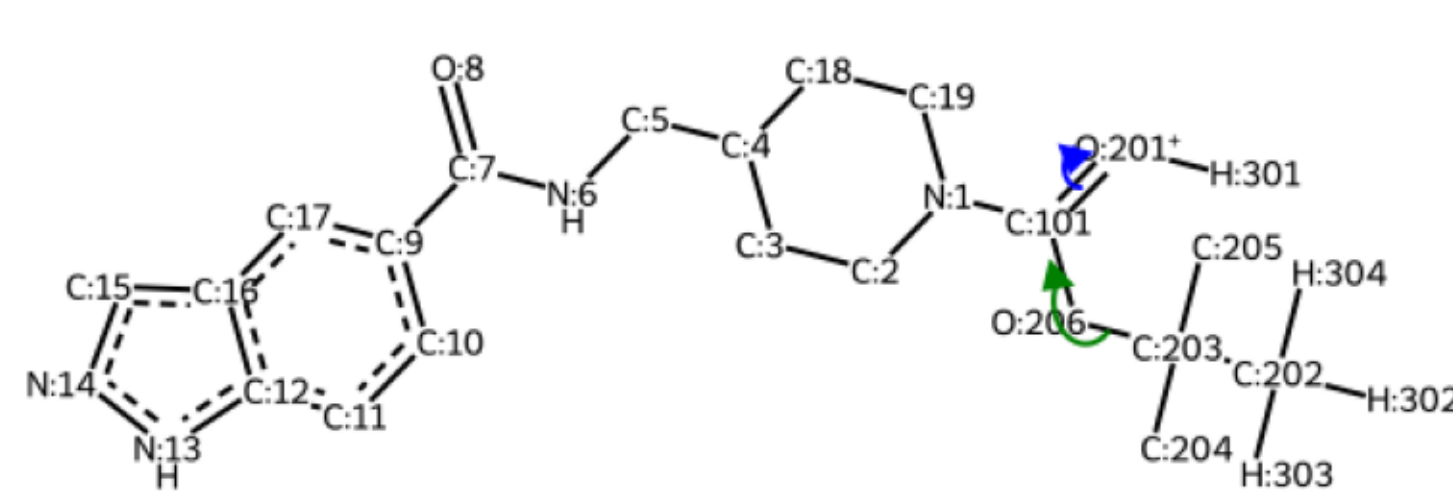

step #3

step #4

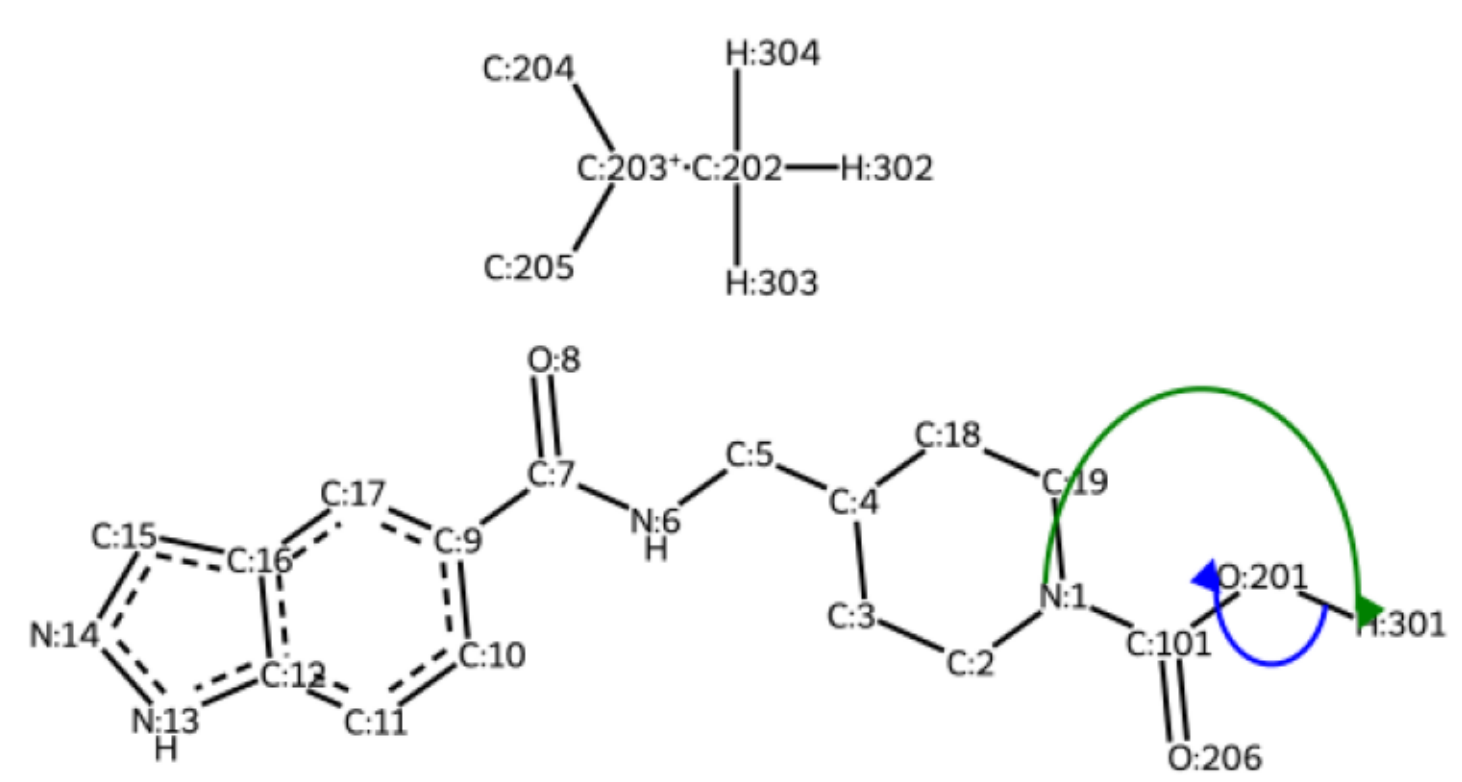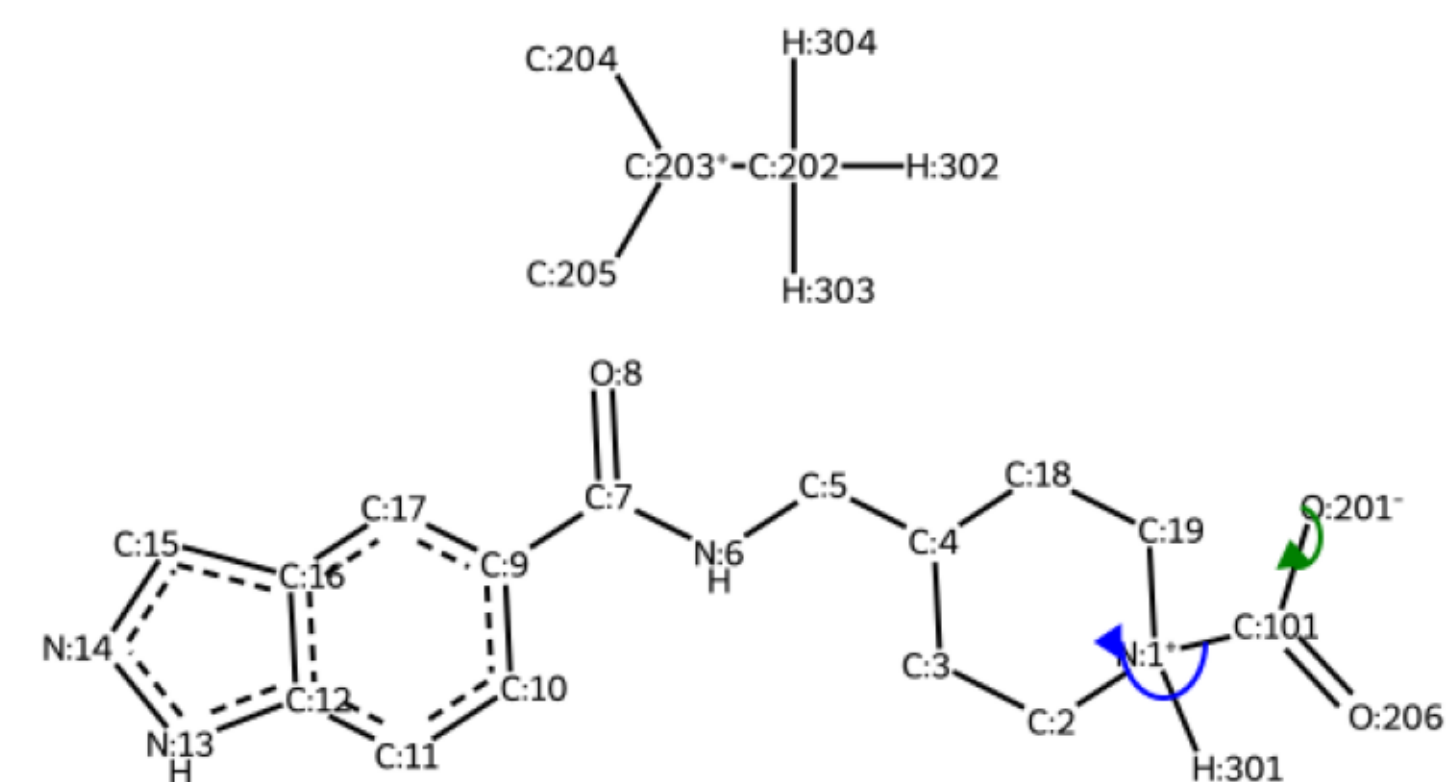

step #5

Product(s)

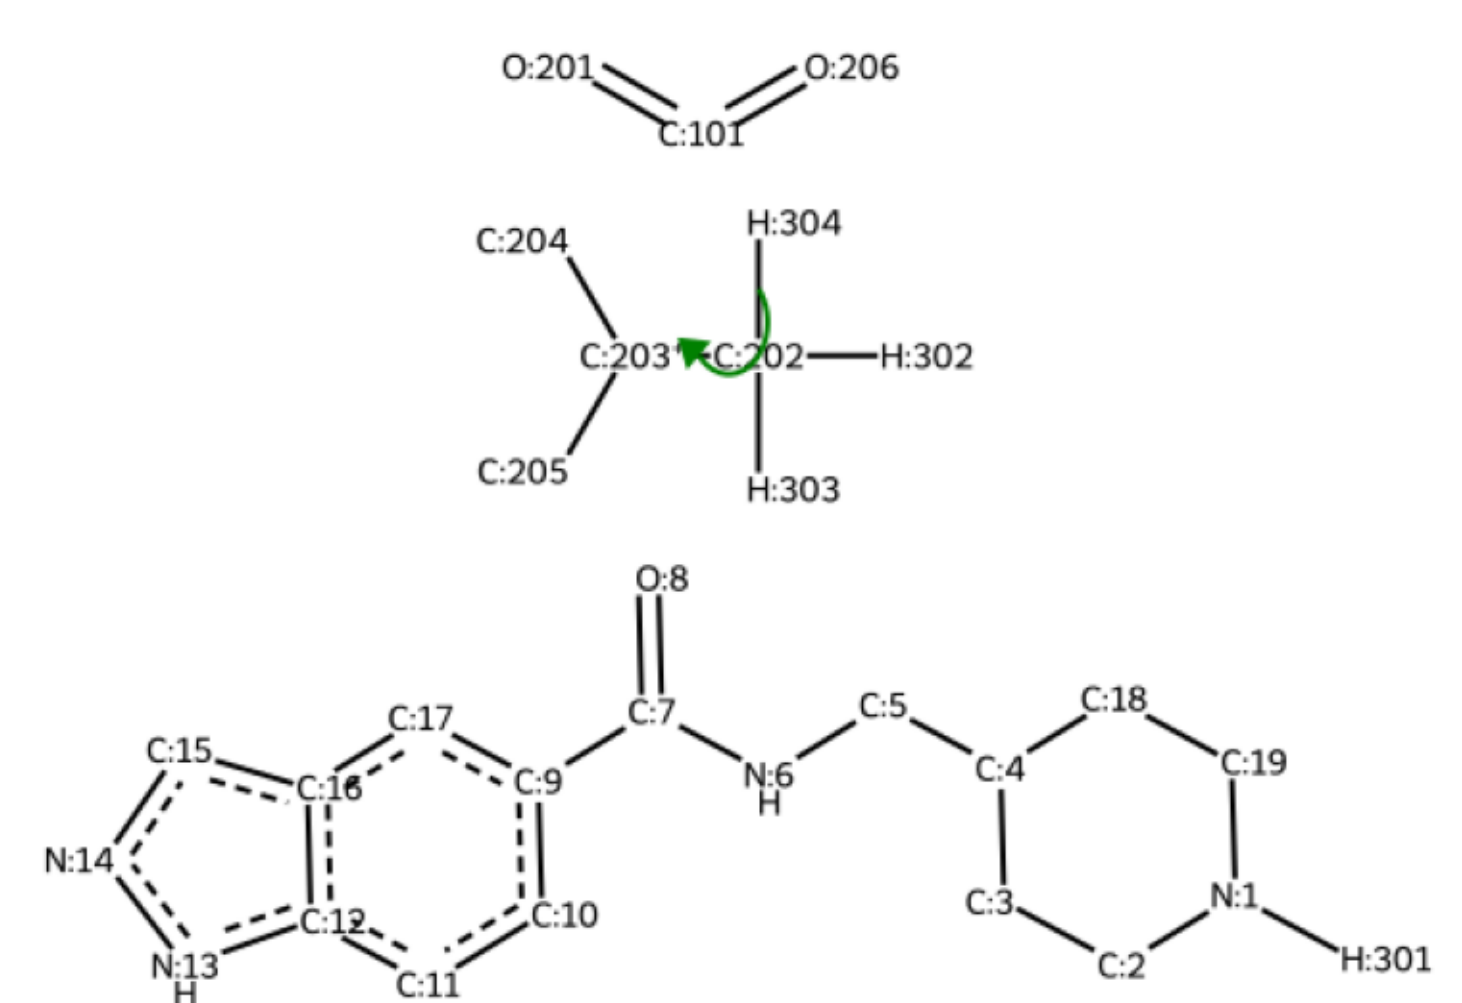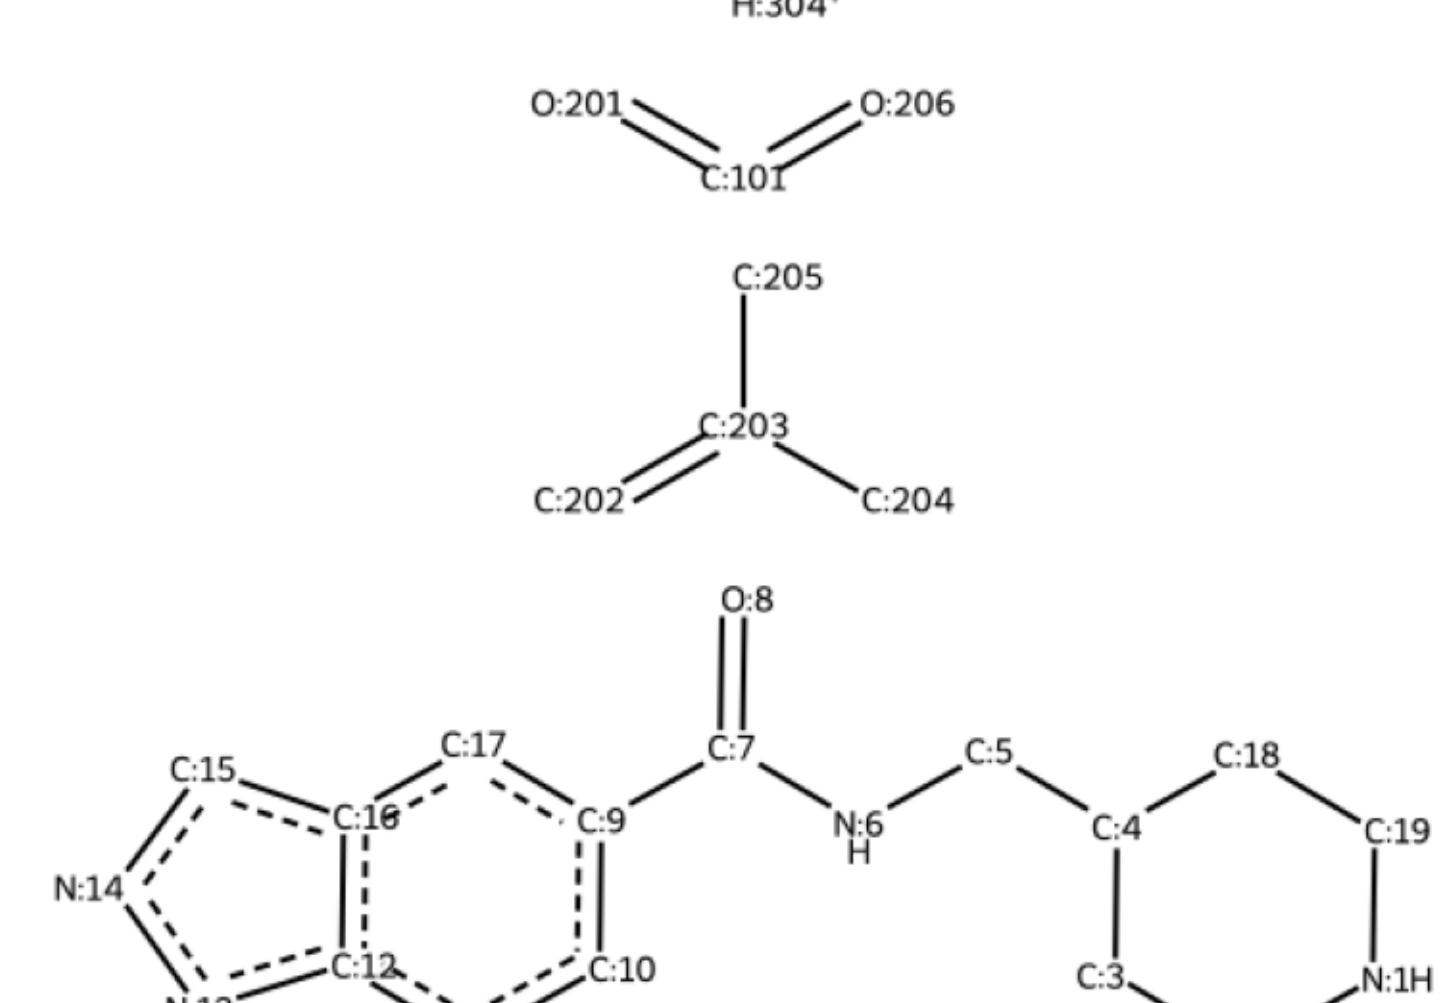

# Original reaction sampled RXN\_ID:89)

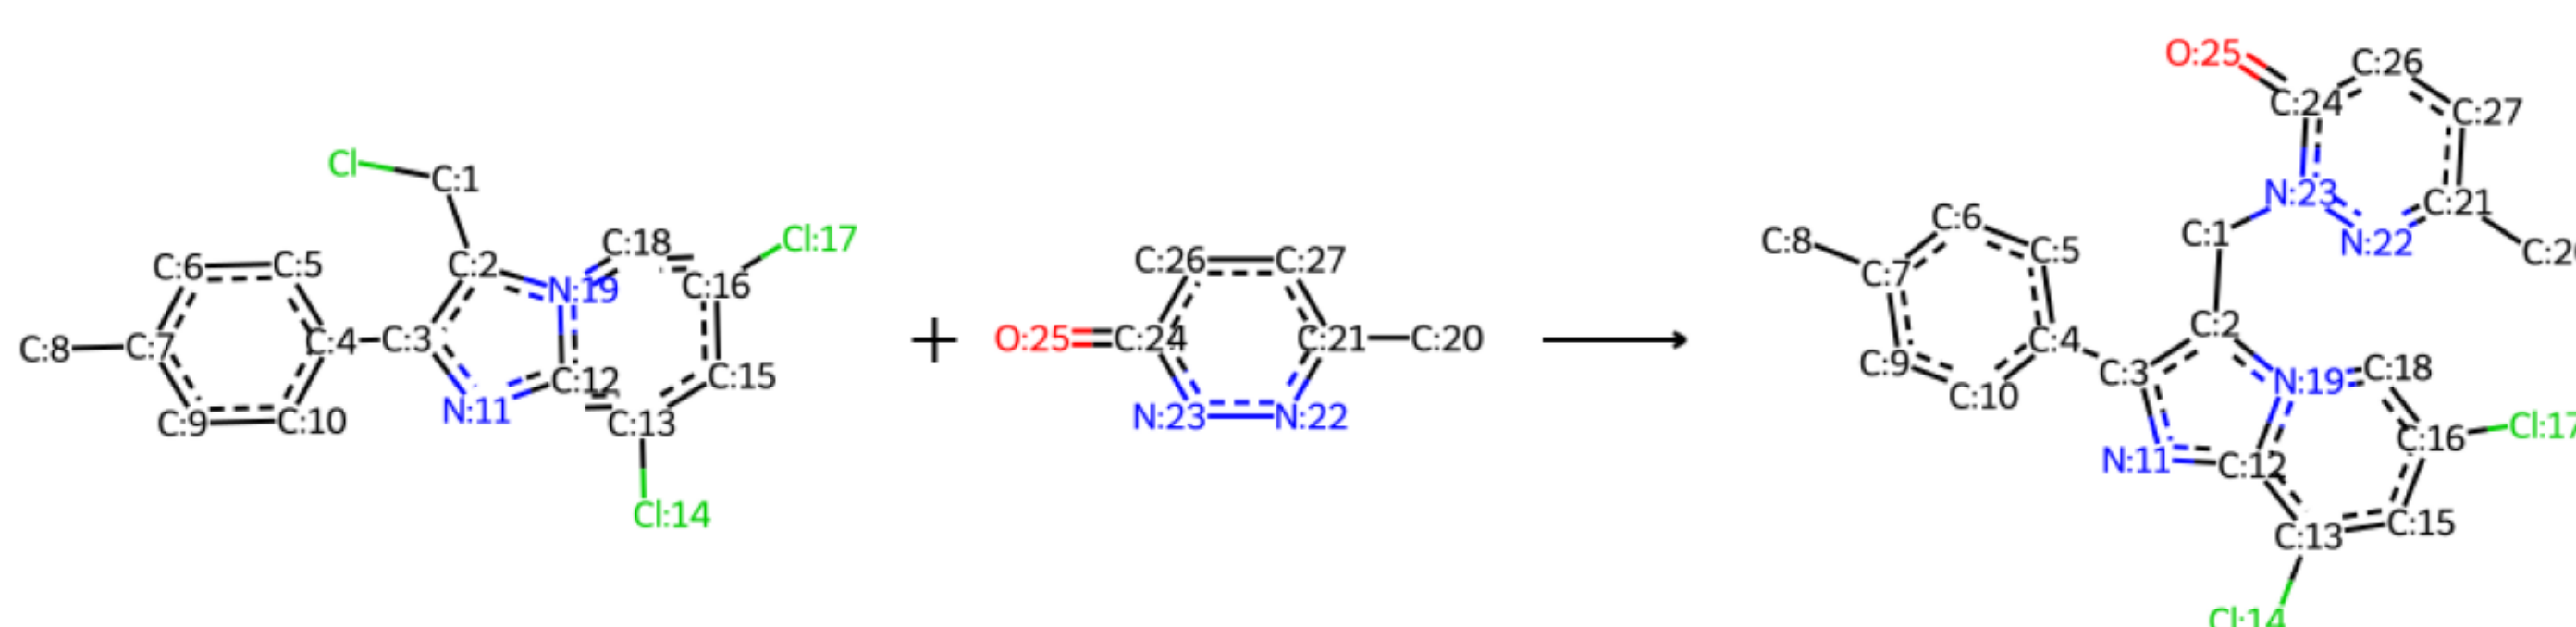

Identified mechanistic class -  
SN2 reaction

Reaction with missing reagents recovered

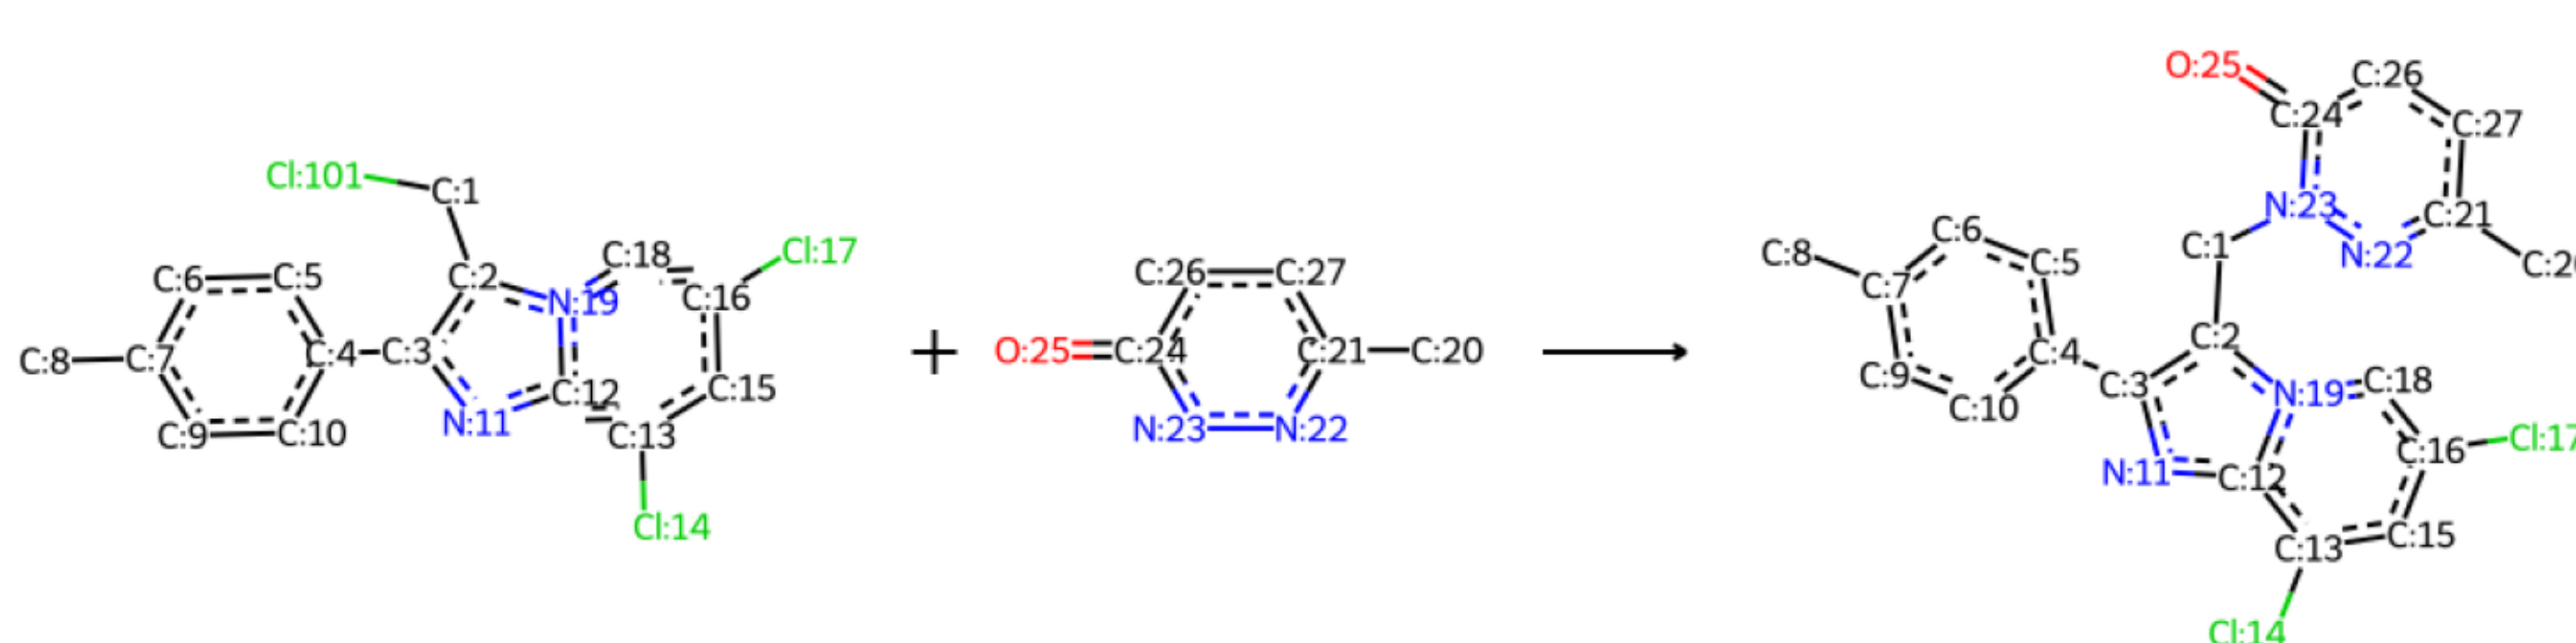

## Proposed mechanistic pathway

[Arrow order: (1) green, (2) blue, (3) red, (4) orange]

step #1

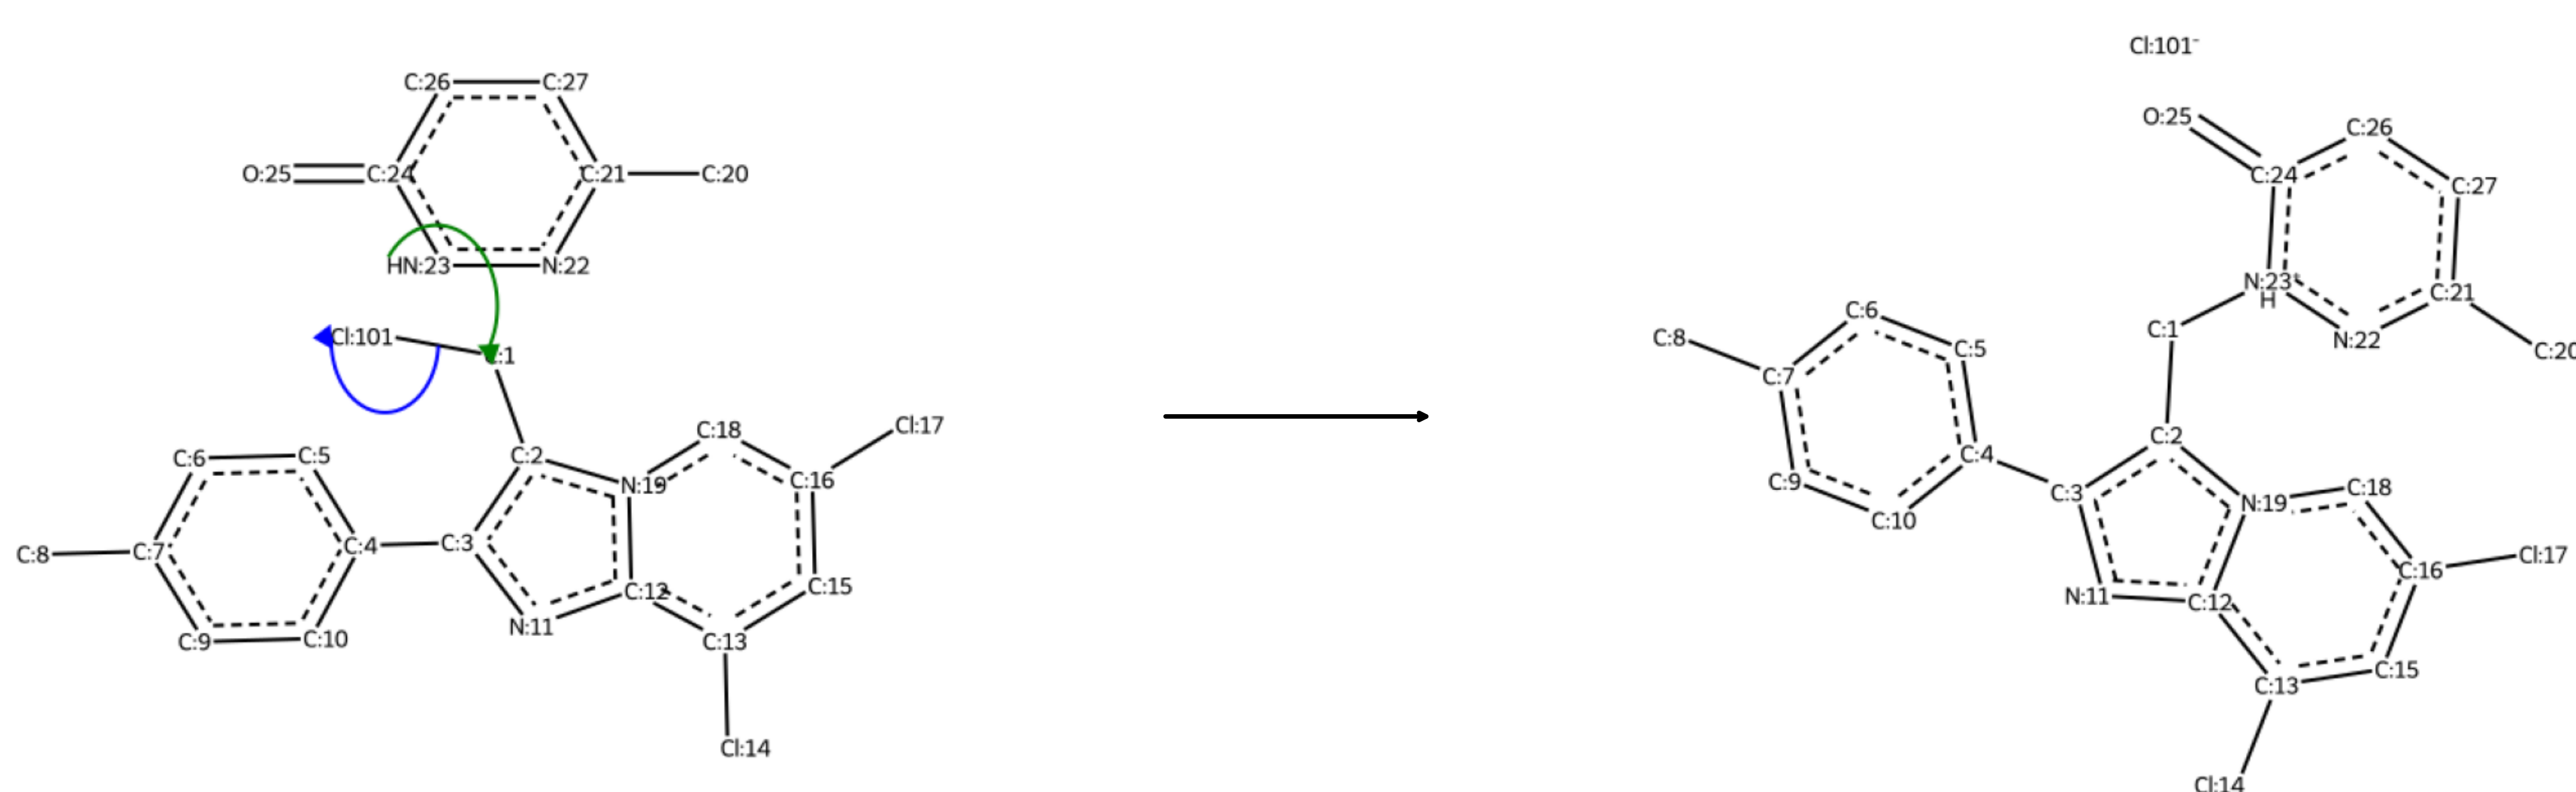

proton transfer

Product(s)

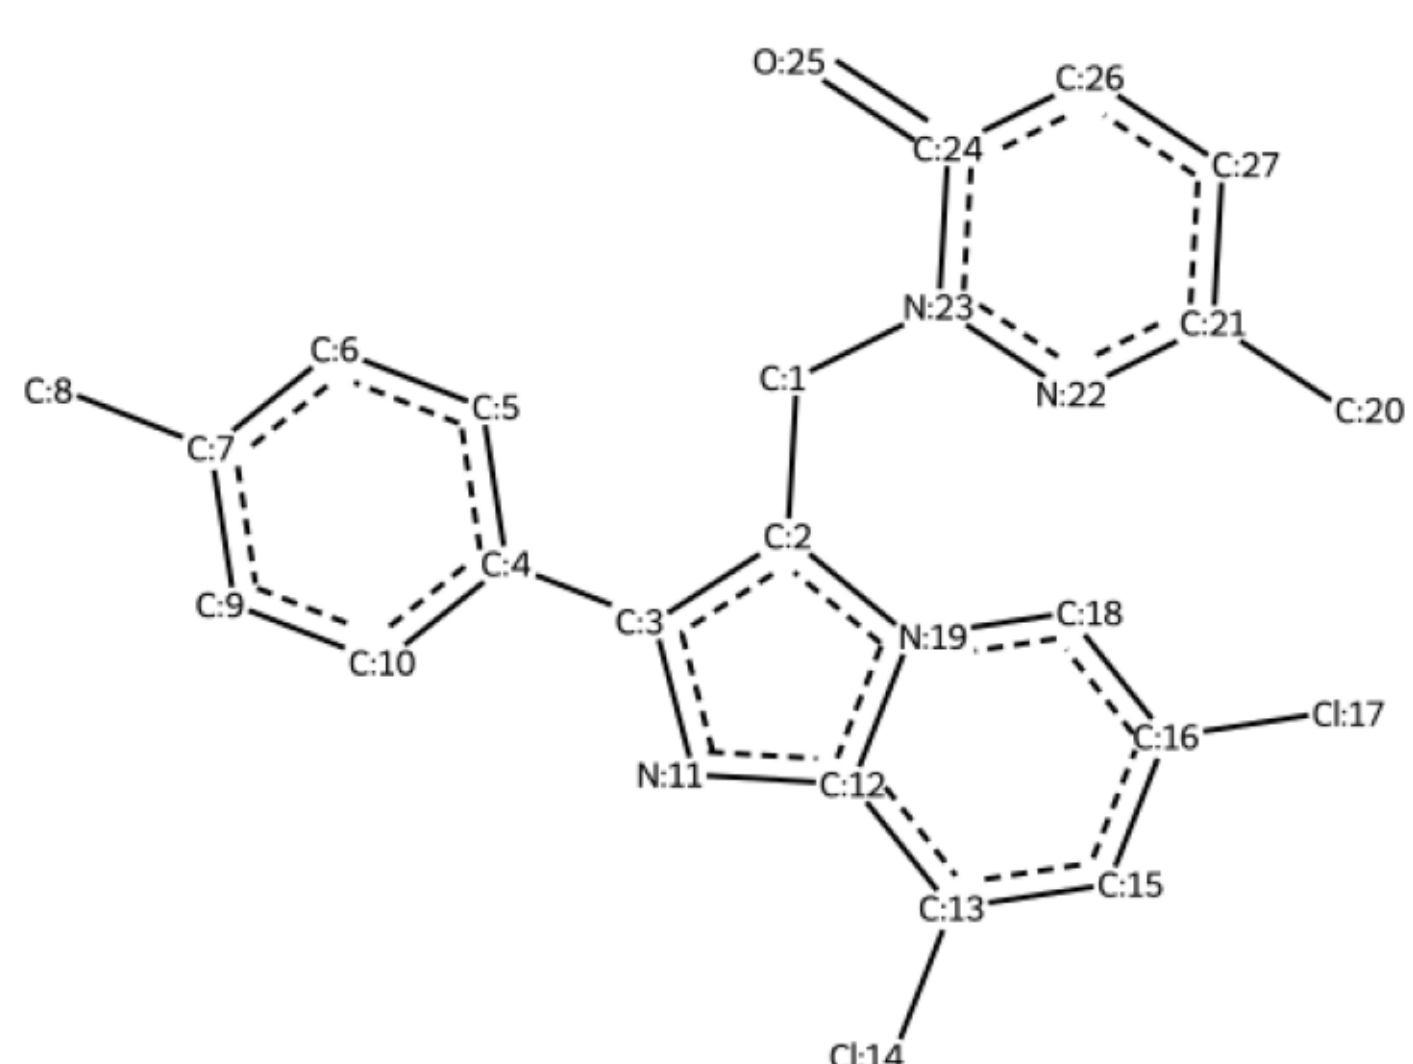



# Original reaction sampled RXN\_ID:90)

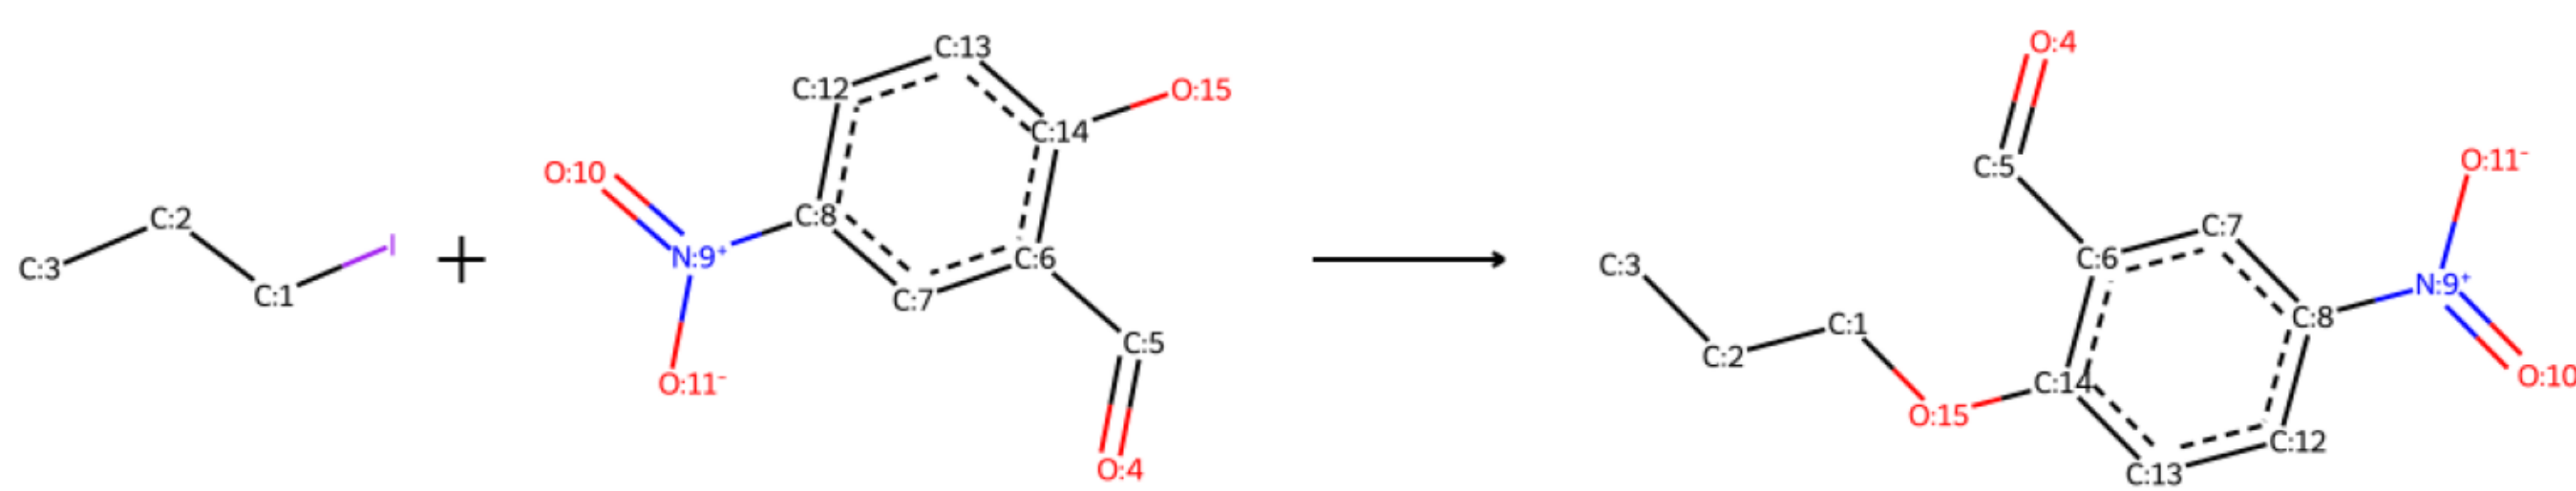

Identified mechanistic class -  
SN<sub>2</sub>\_alcohol(thiol) reaction

## Reaction with missing reagents recovered

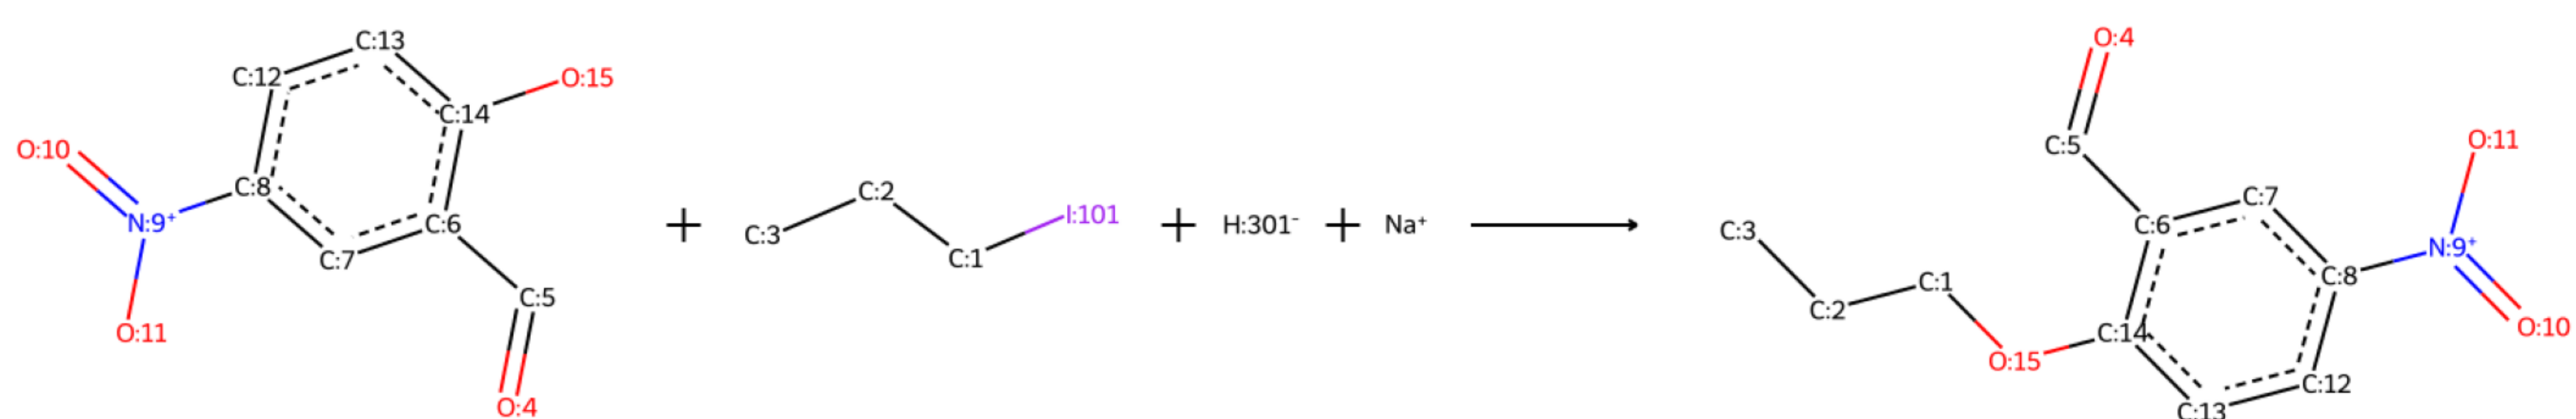

## Proposed mechanistic pathway

[Arrow order: (1) green, (2) blue, (3) red, (4) orange]

step #1

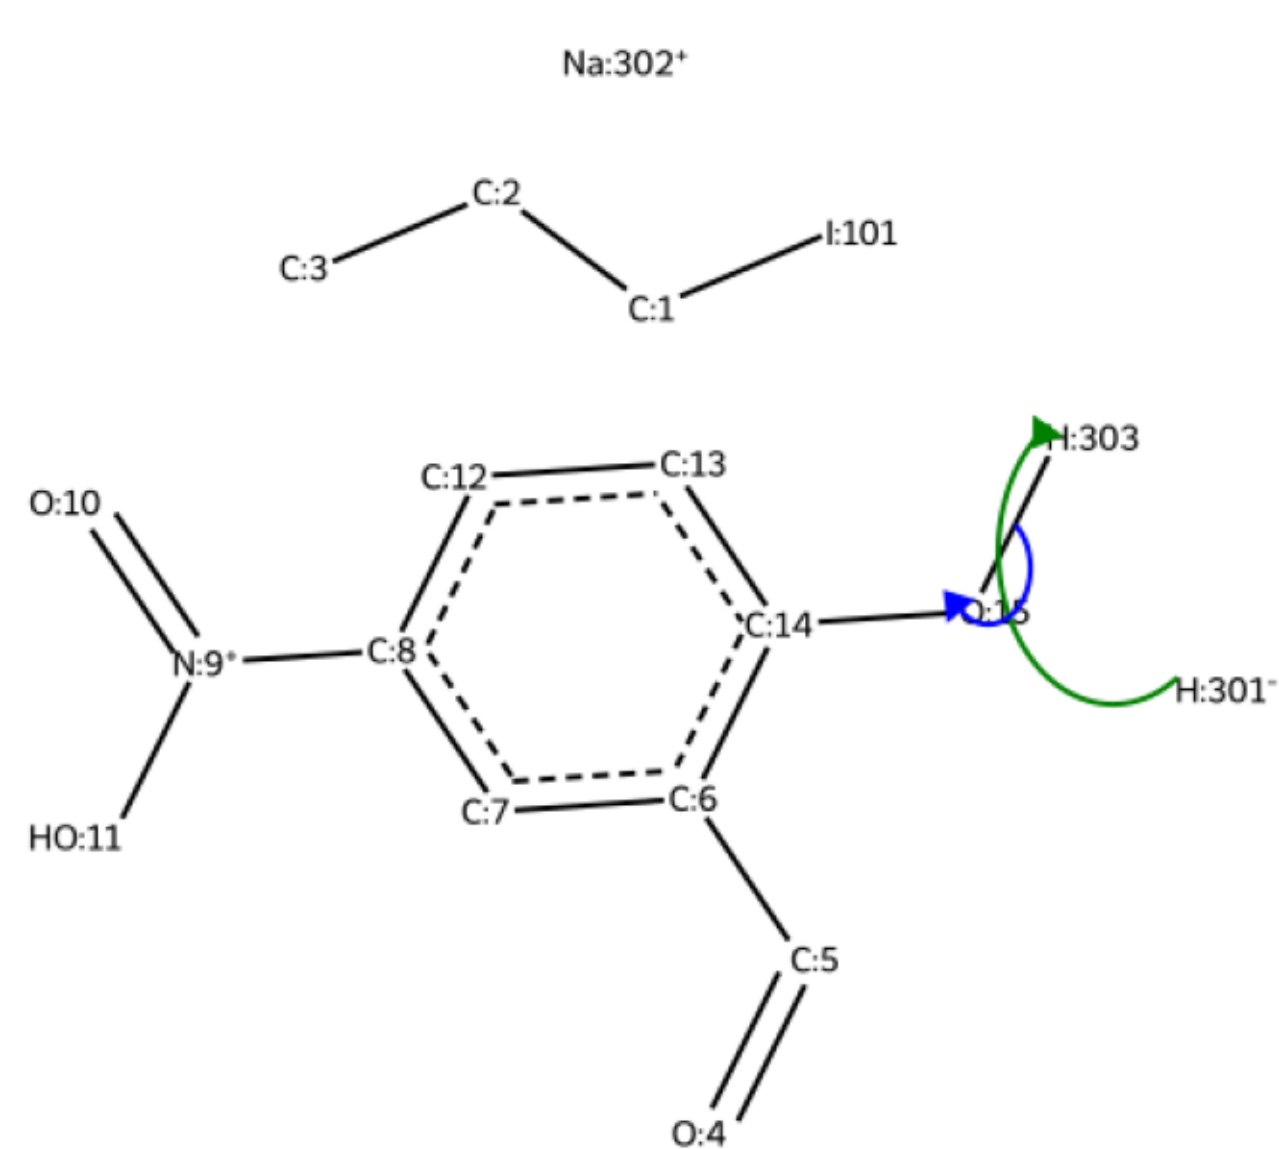

step #2

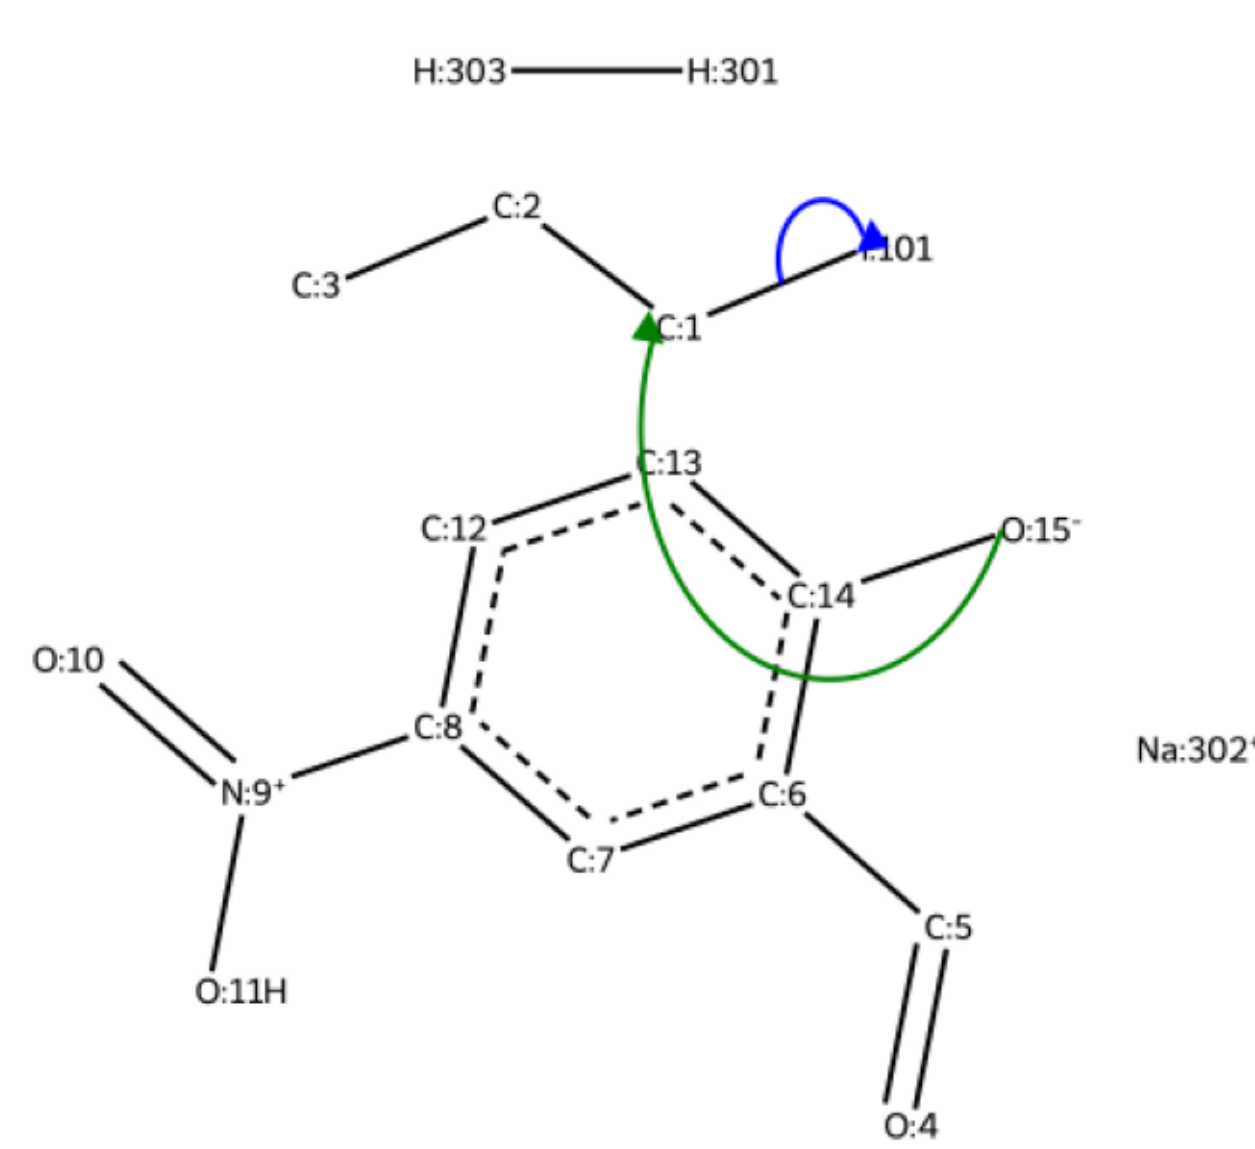

Product(s)

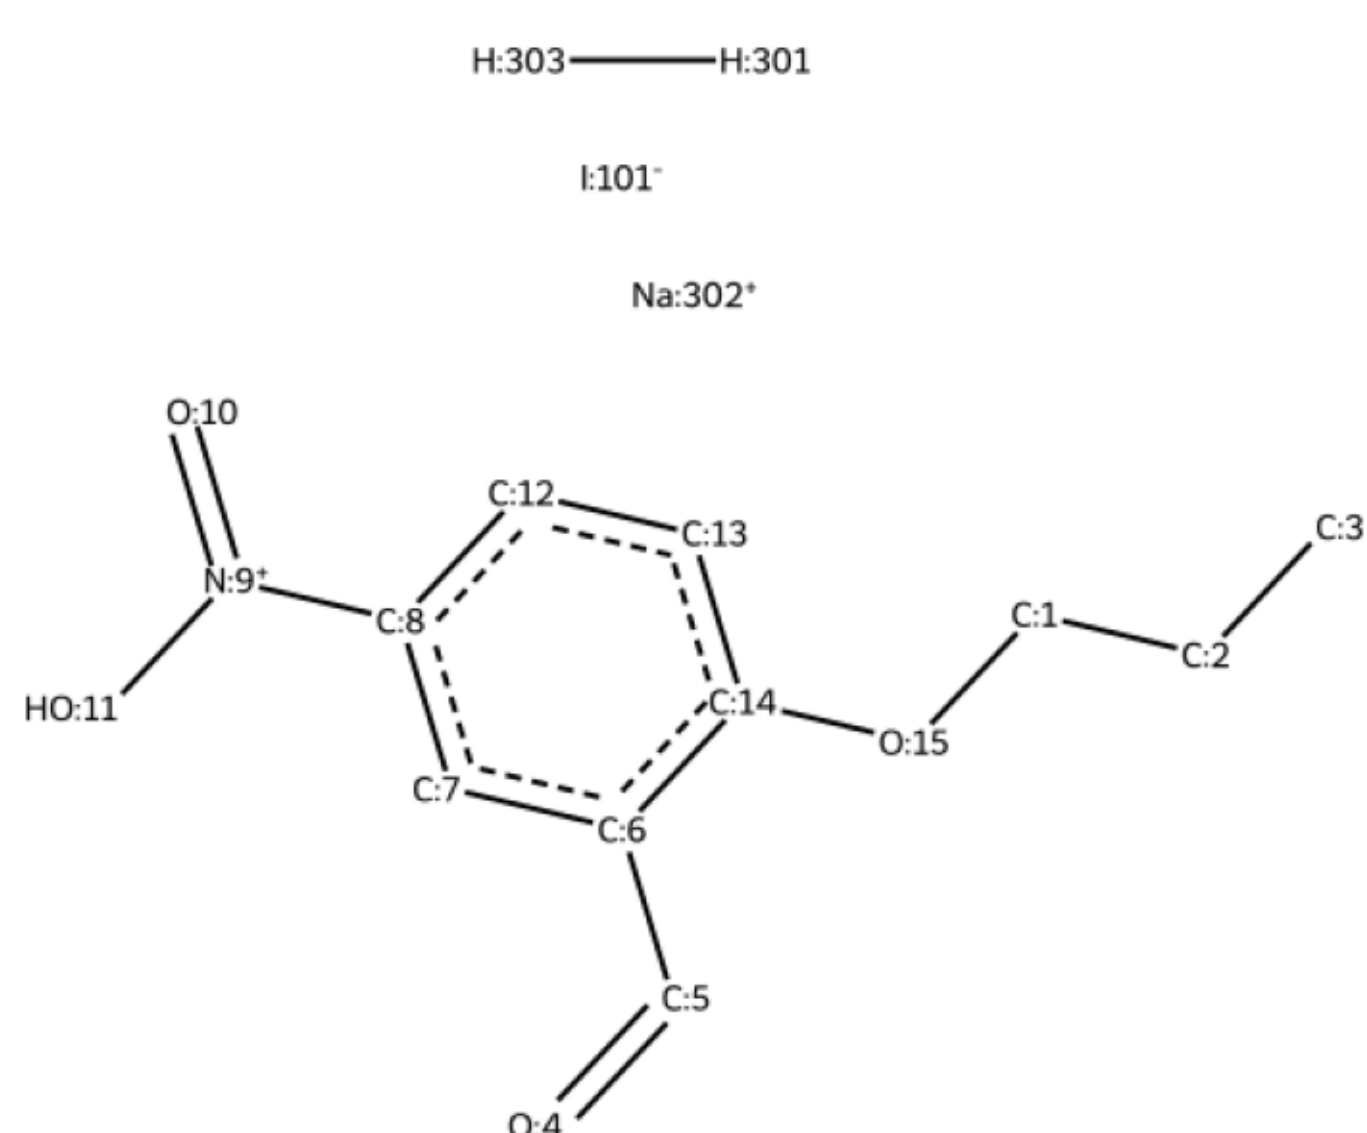

Original reaction  
sampled RXN\_ID:91)

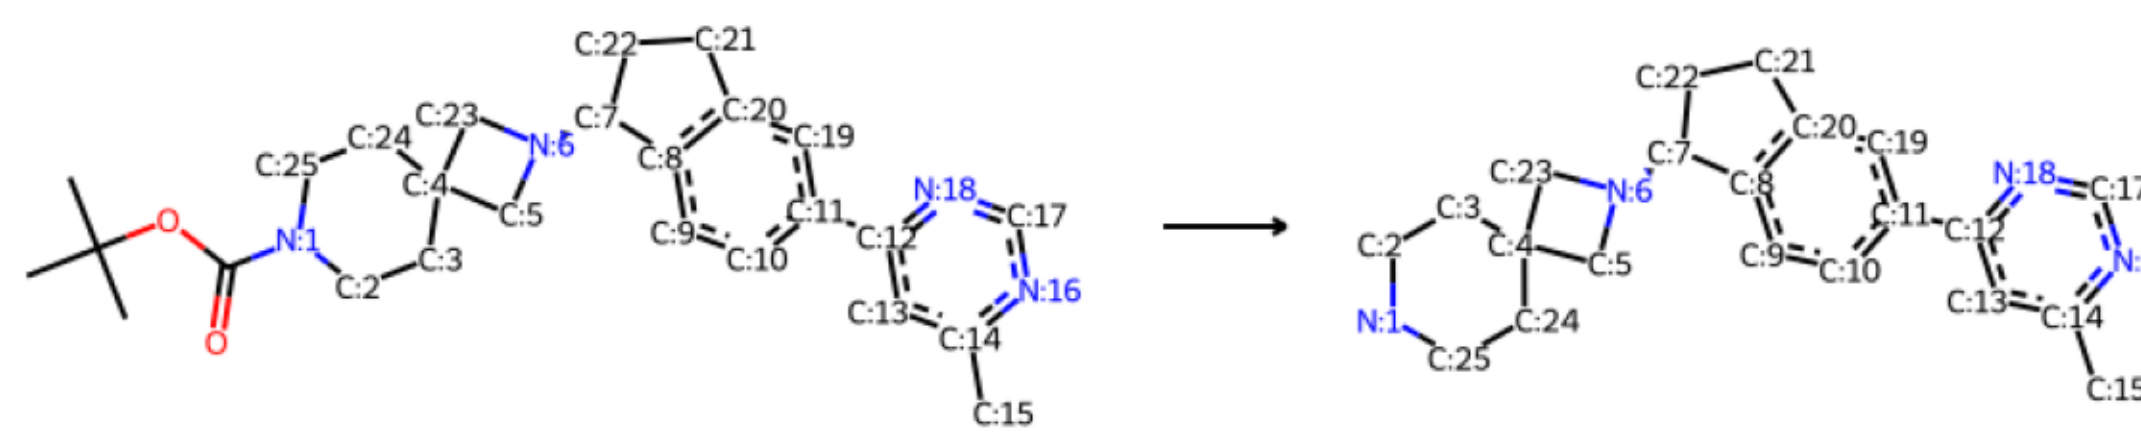

Identified mechanistic class -  
Boc\_deprotection reaction

Reaction with missing reagents recovered

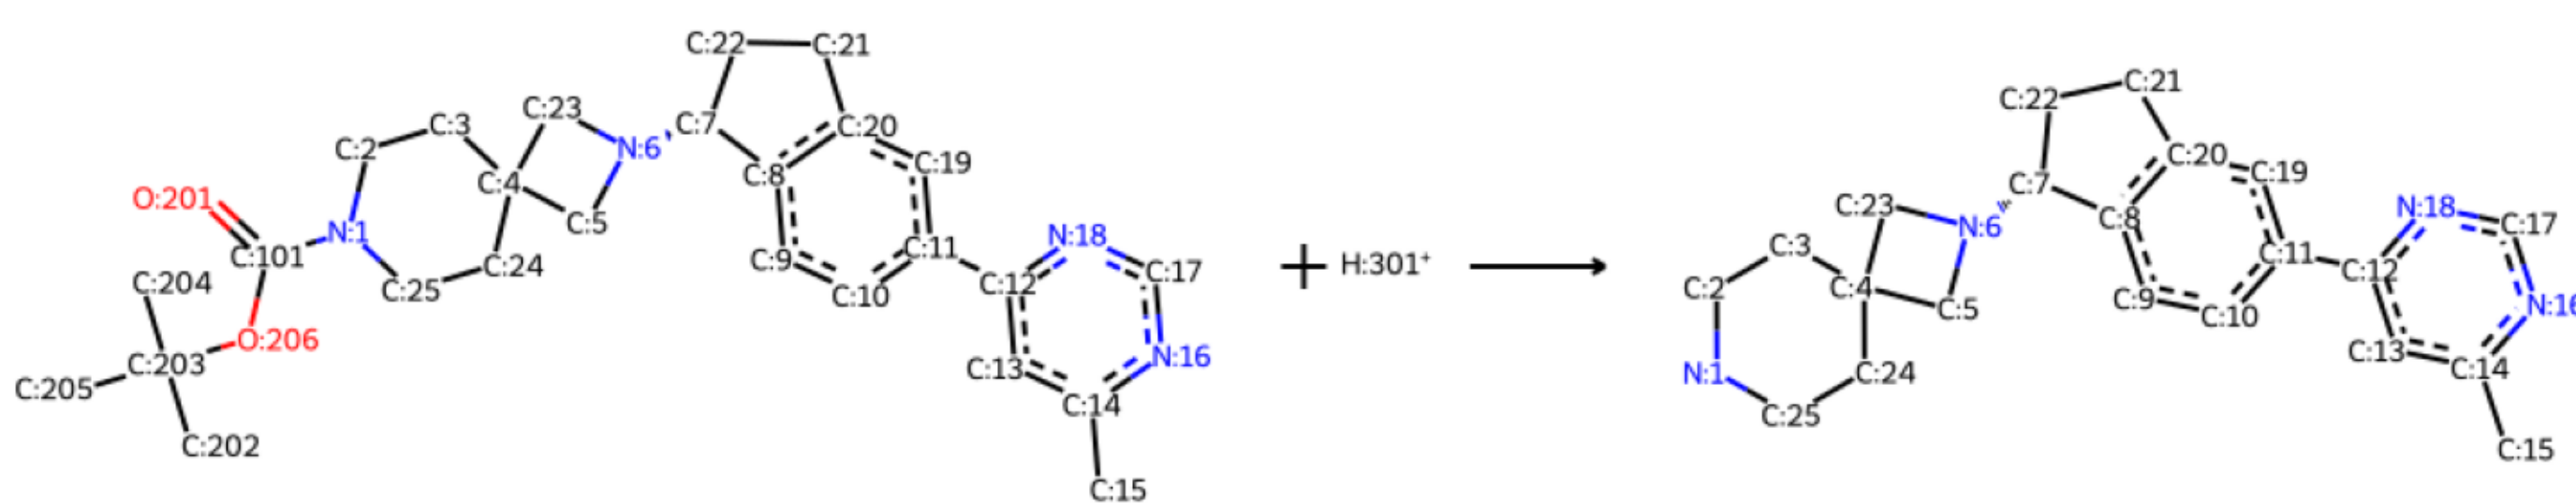

Proposed mechanistic pathway

[Arrow order: (1) green, (2) blue, (3) red, (4) orange]

step #1

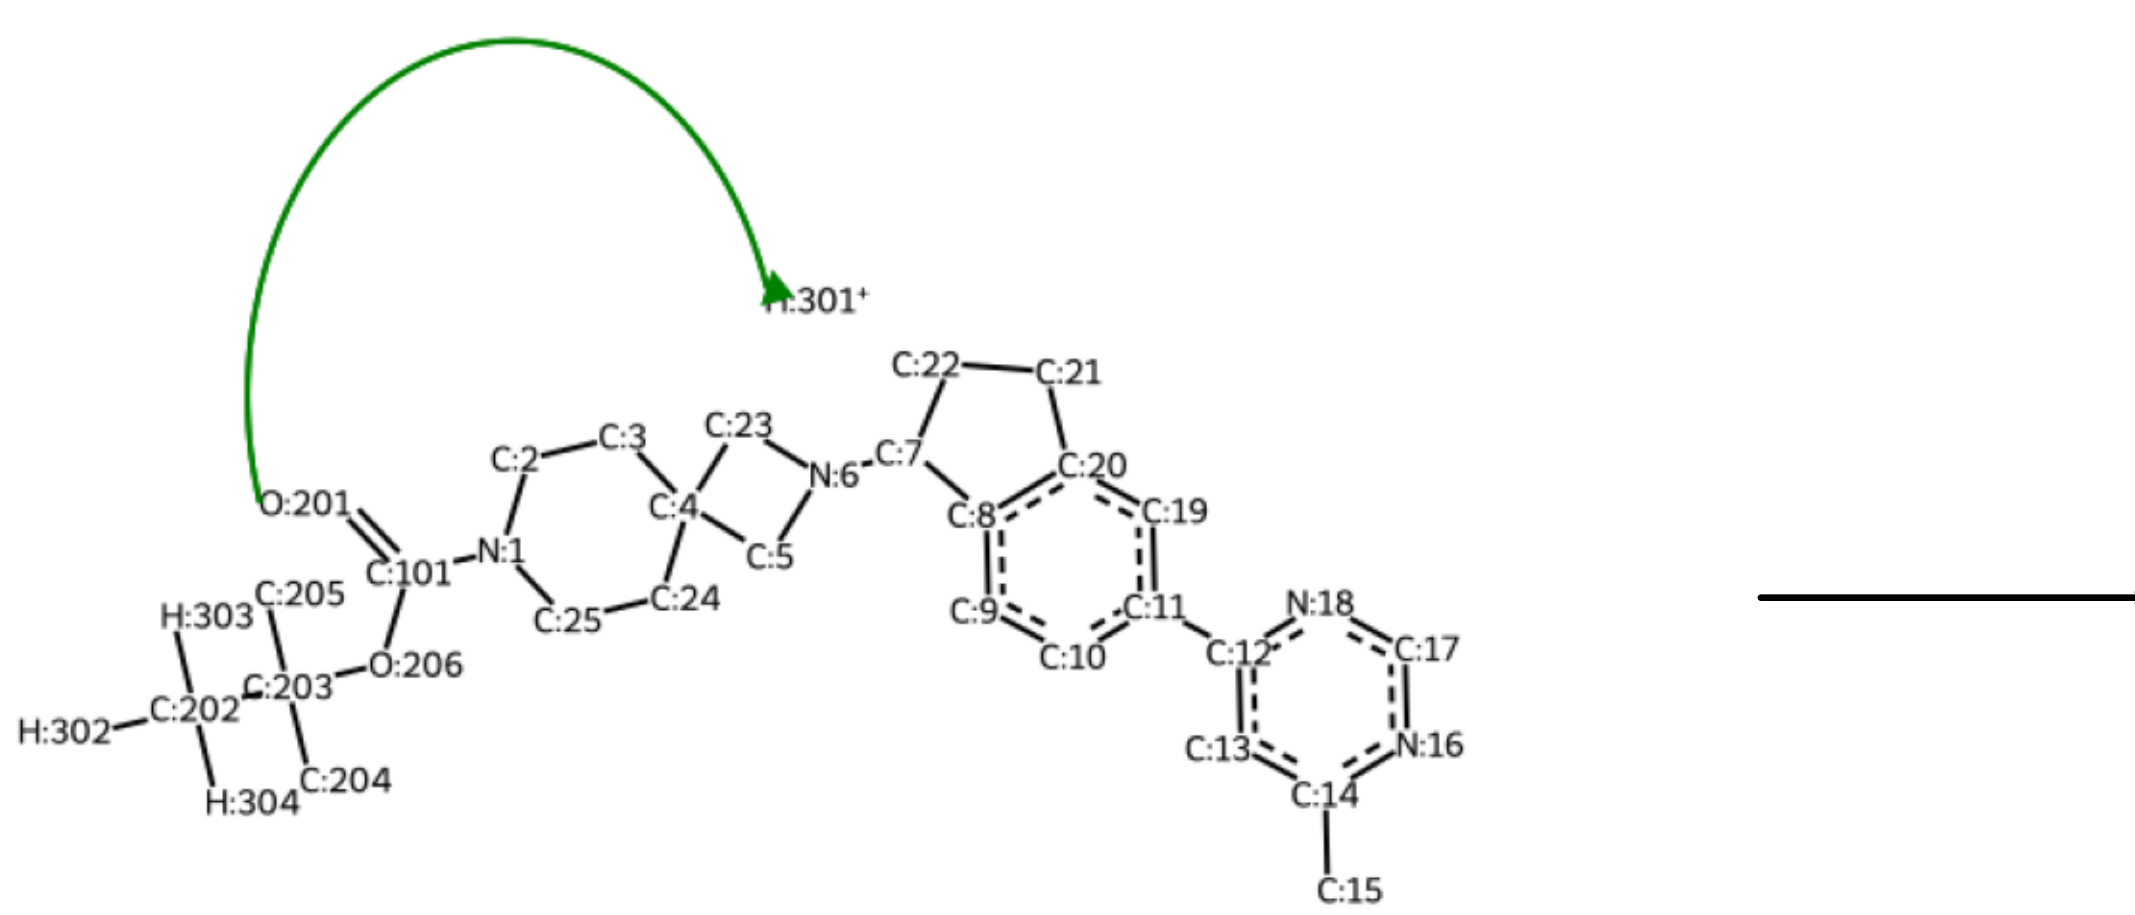

step #2

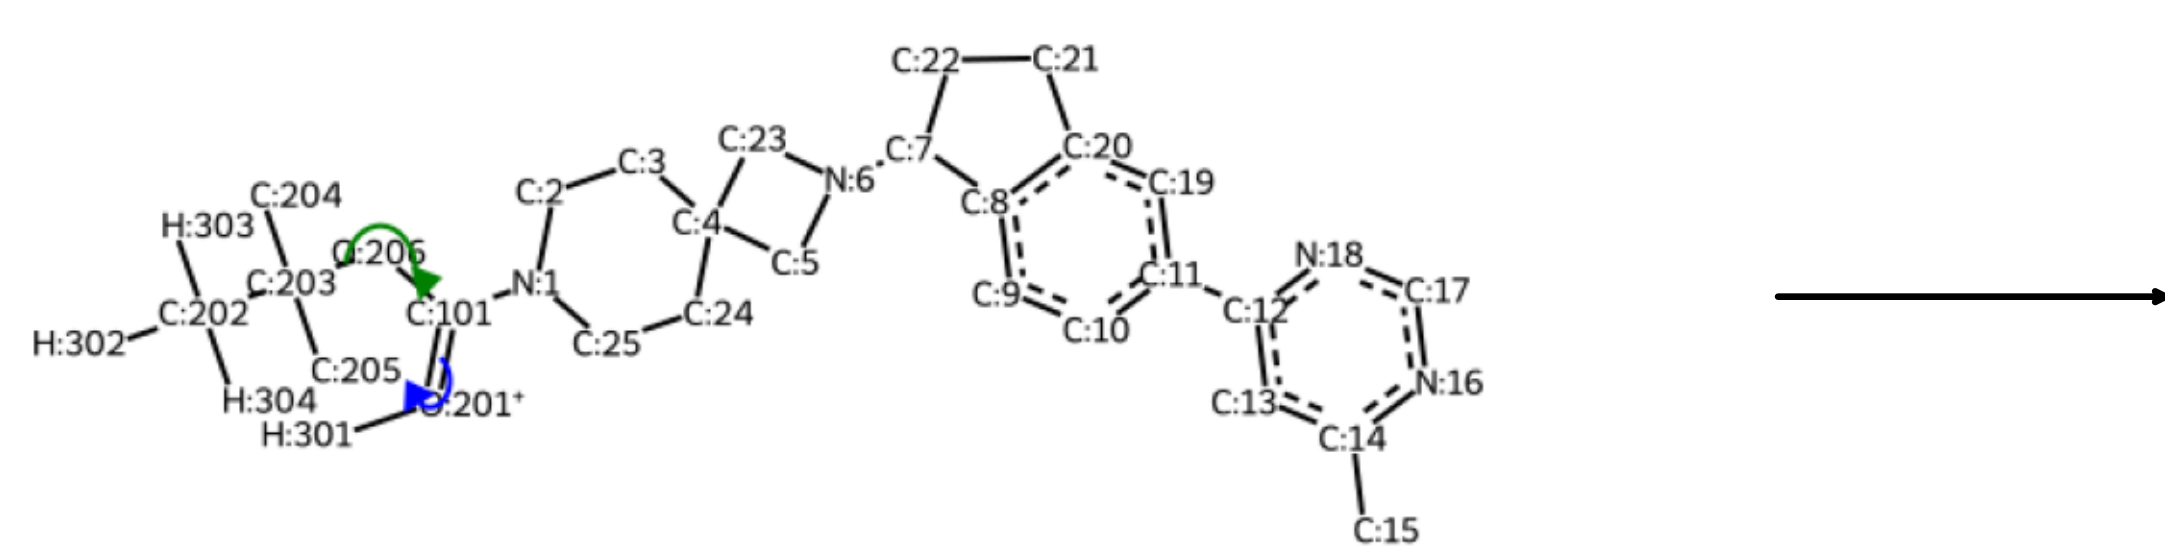

step #3

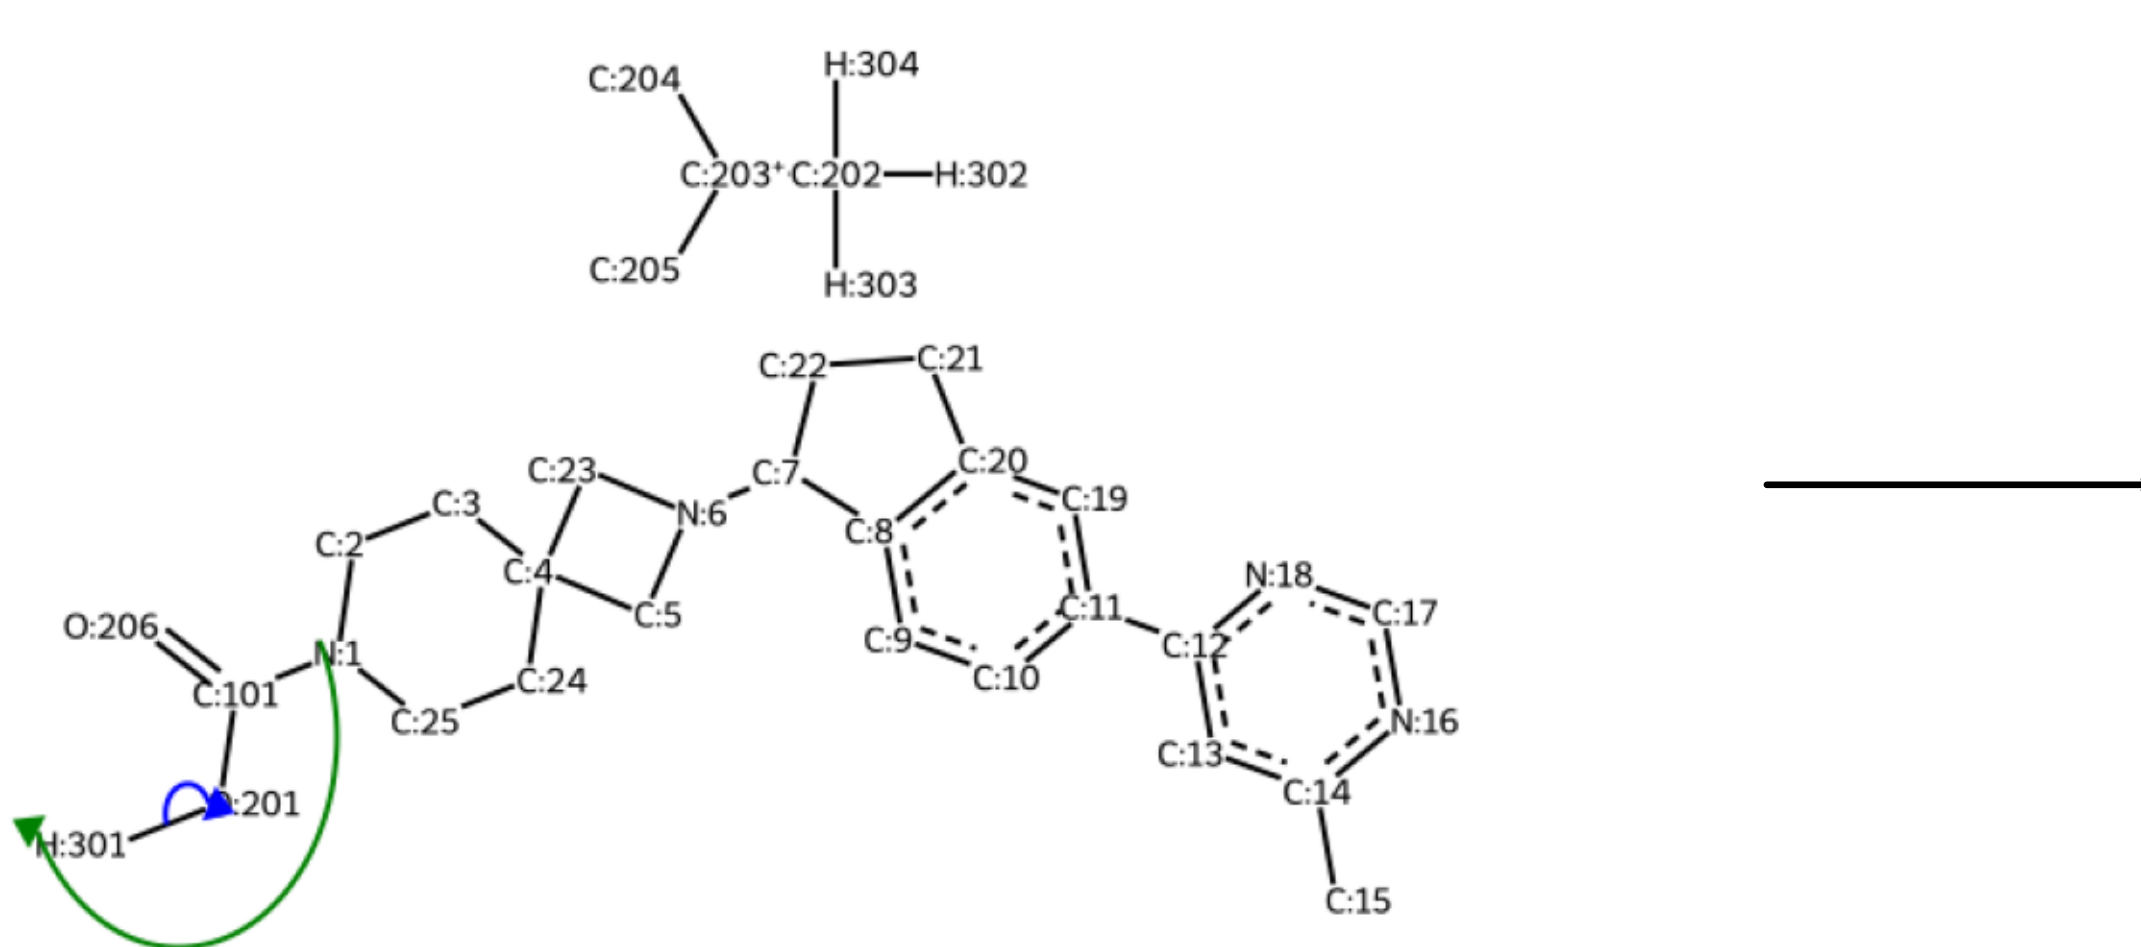

step #4

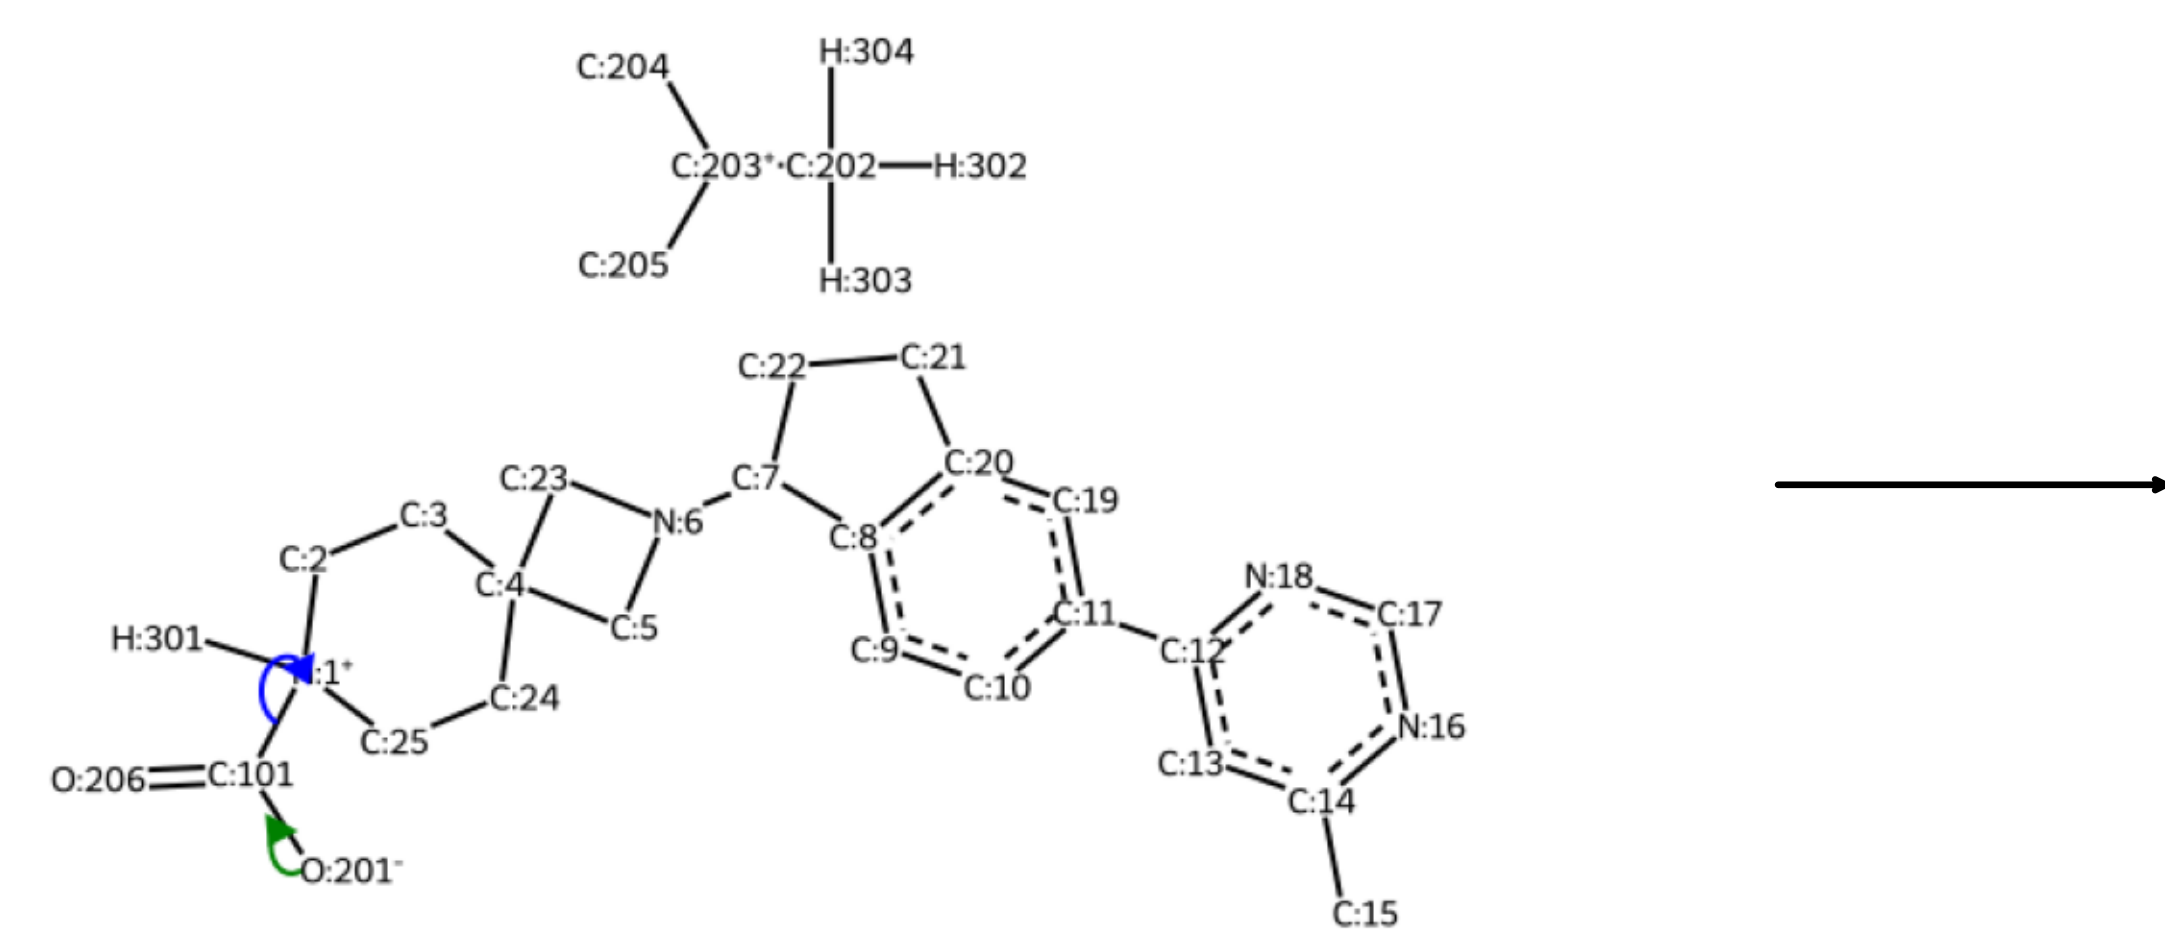

step #5

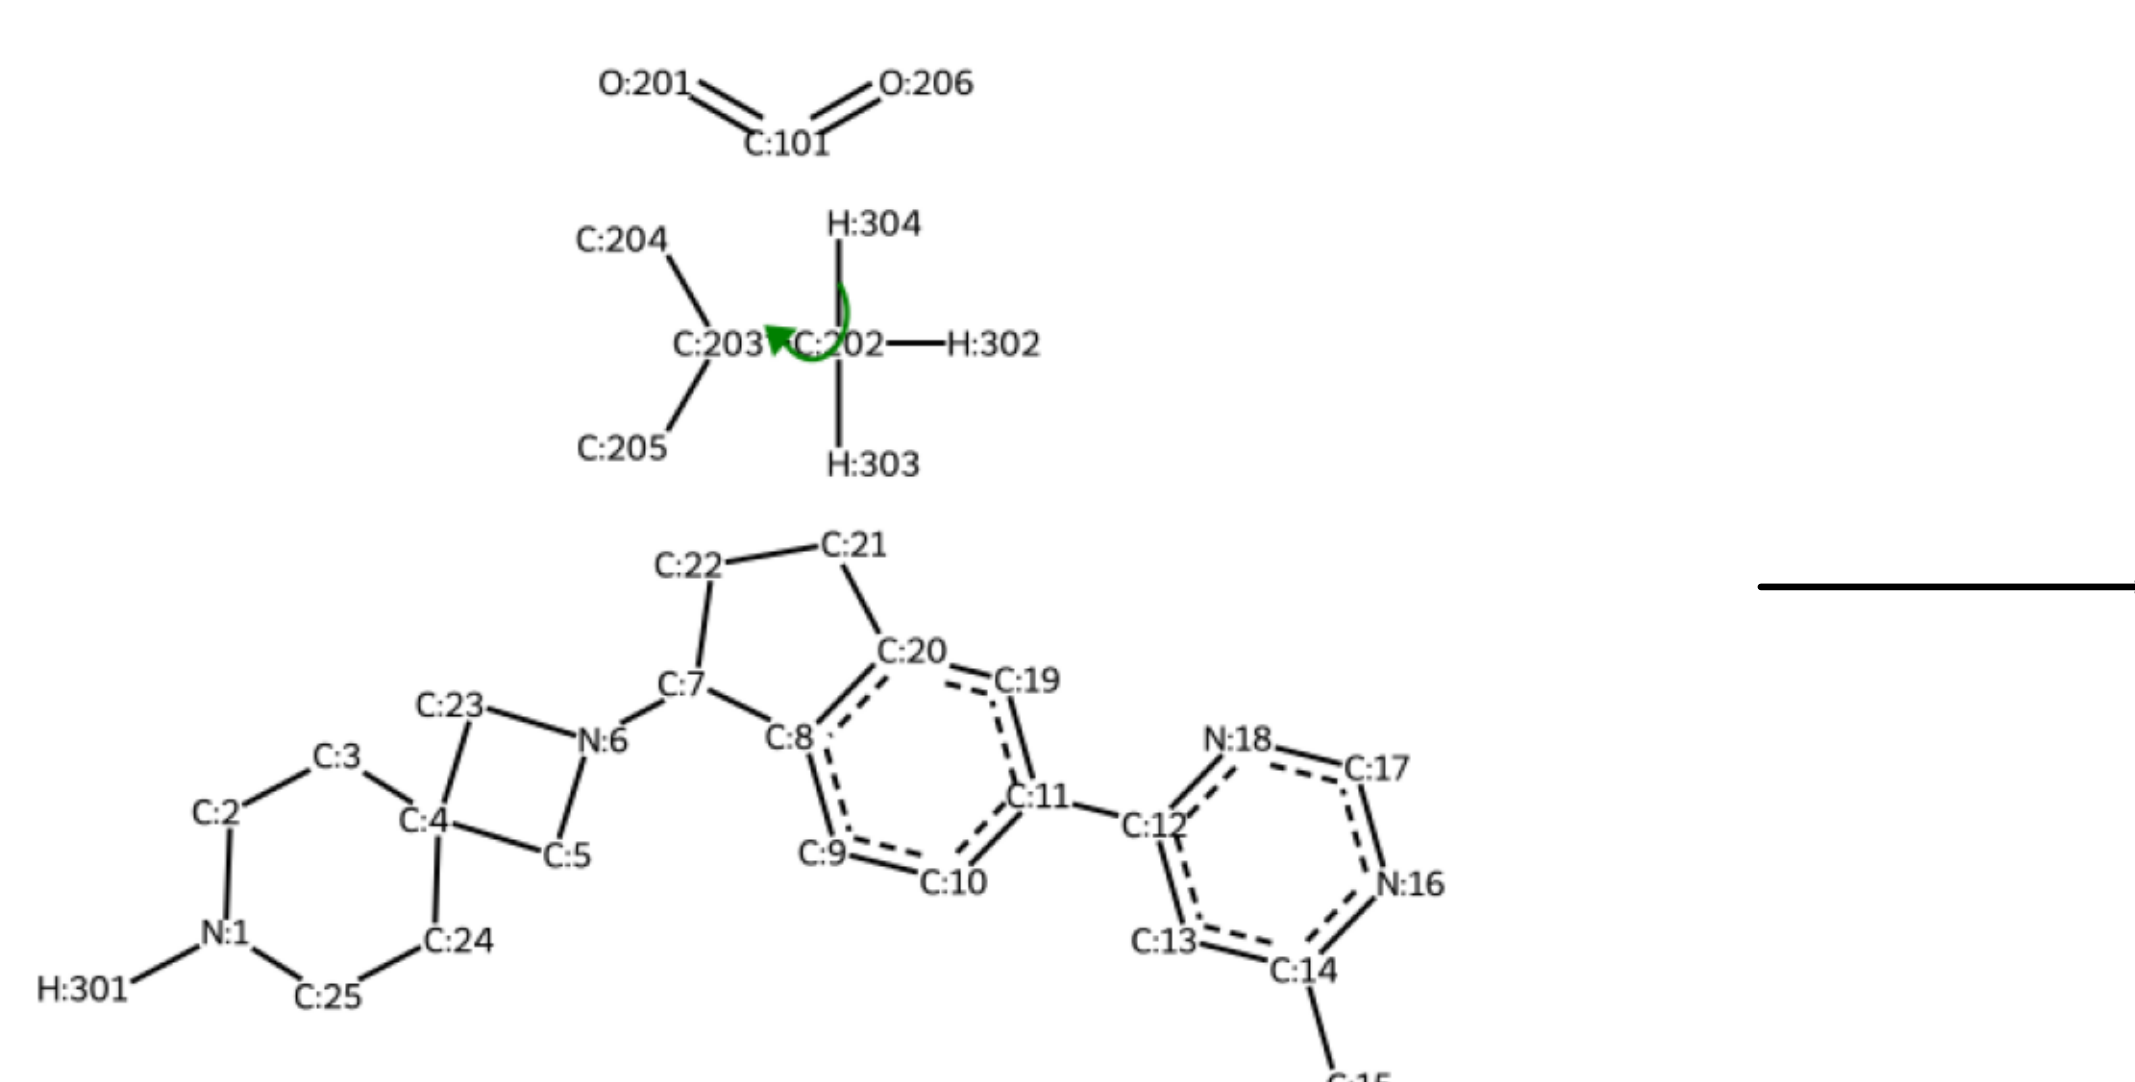

Product(s)

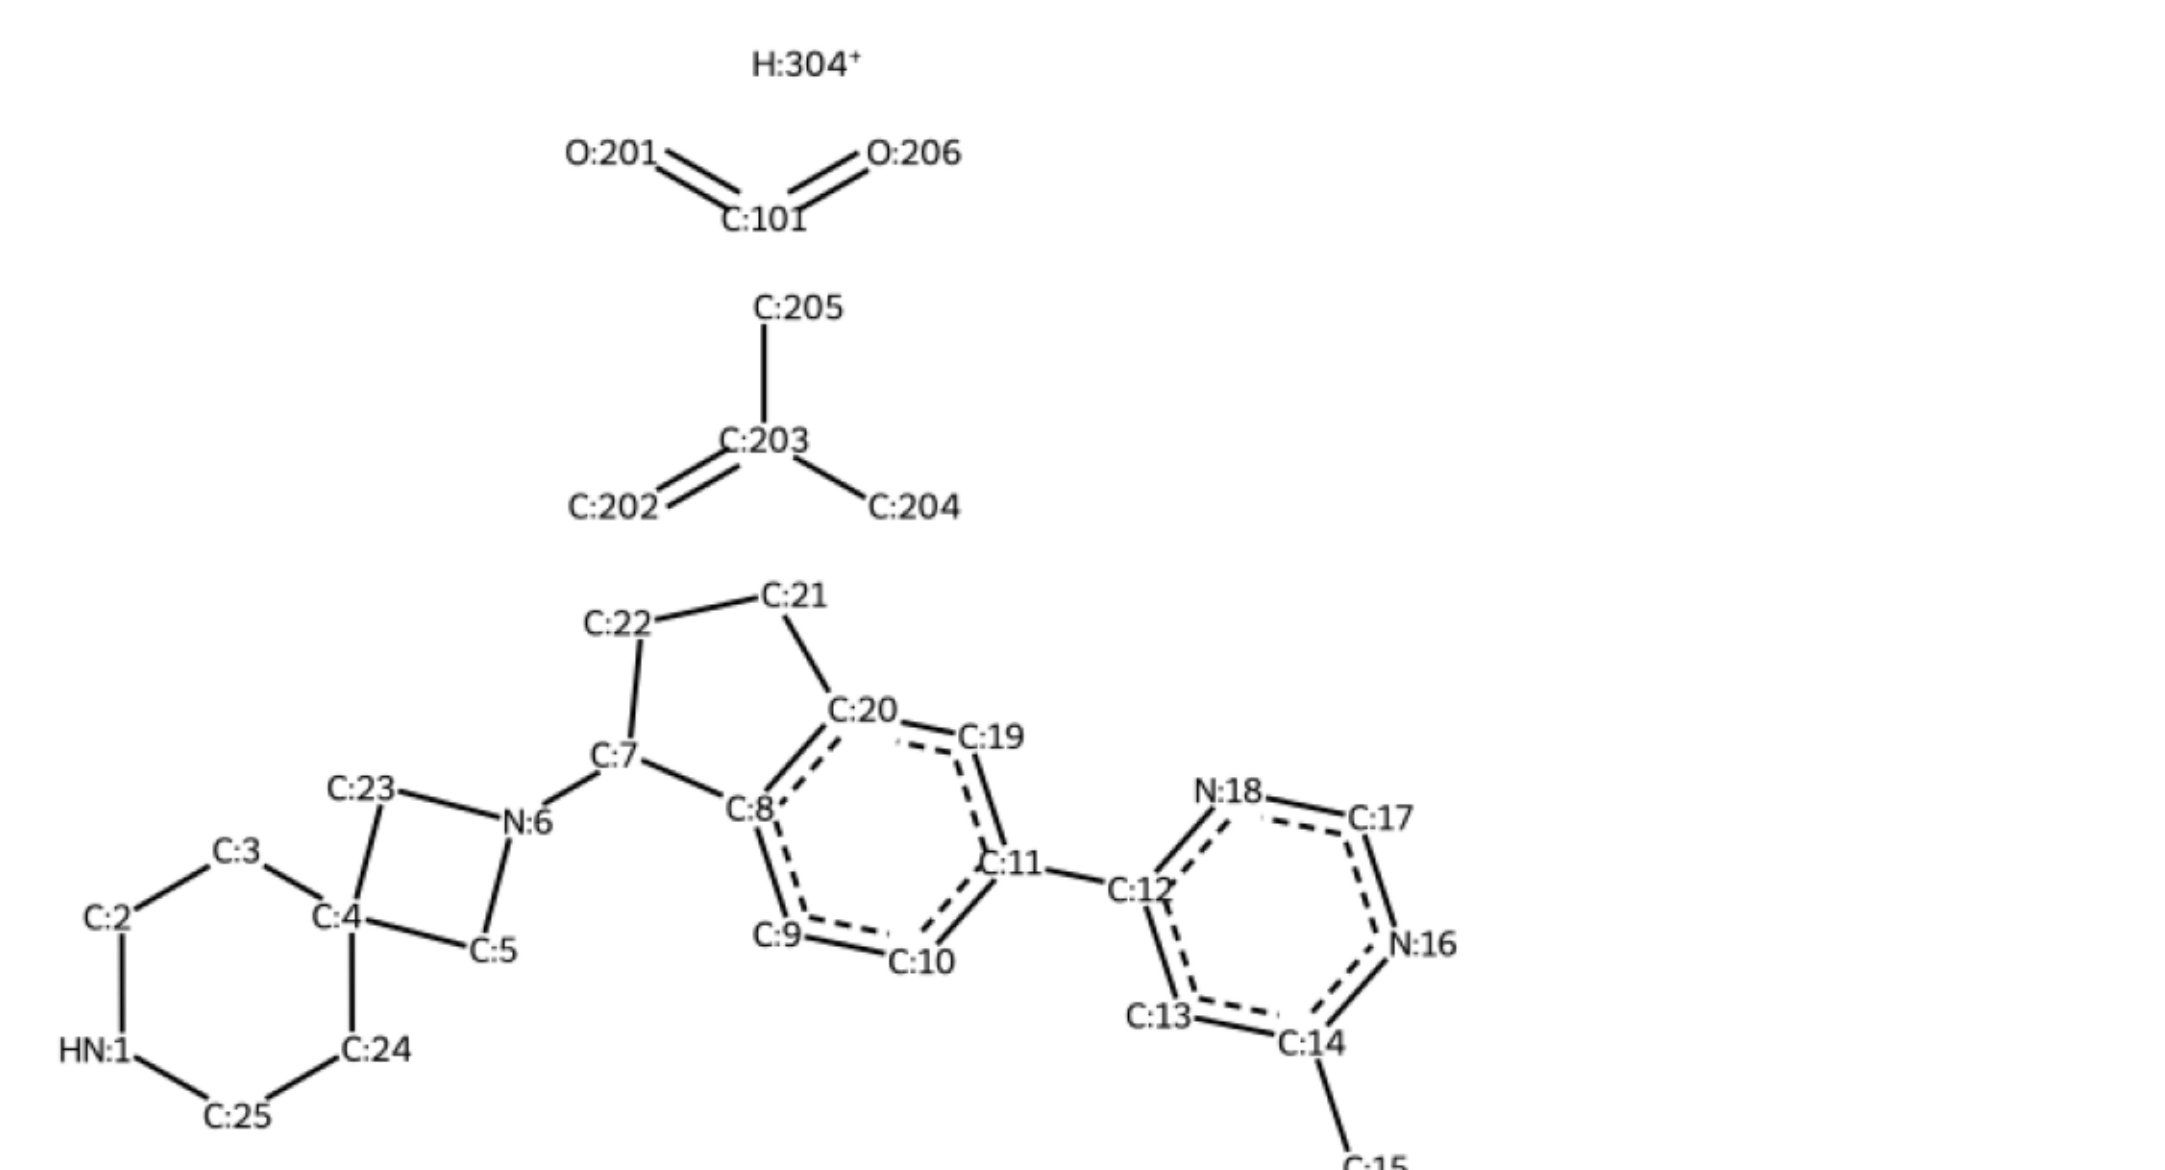



Original reaction  
sampled RXN\_ID:92)

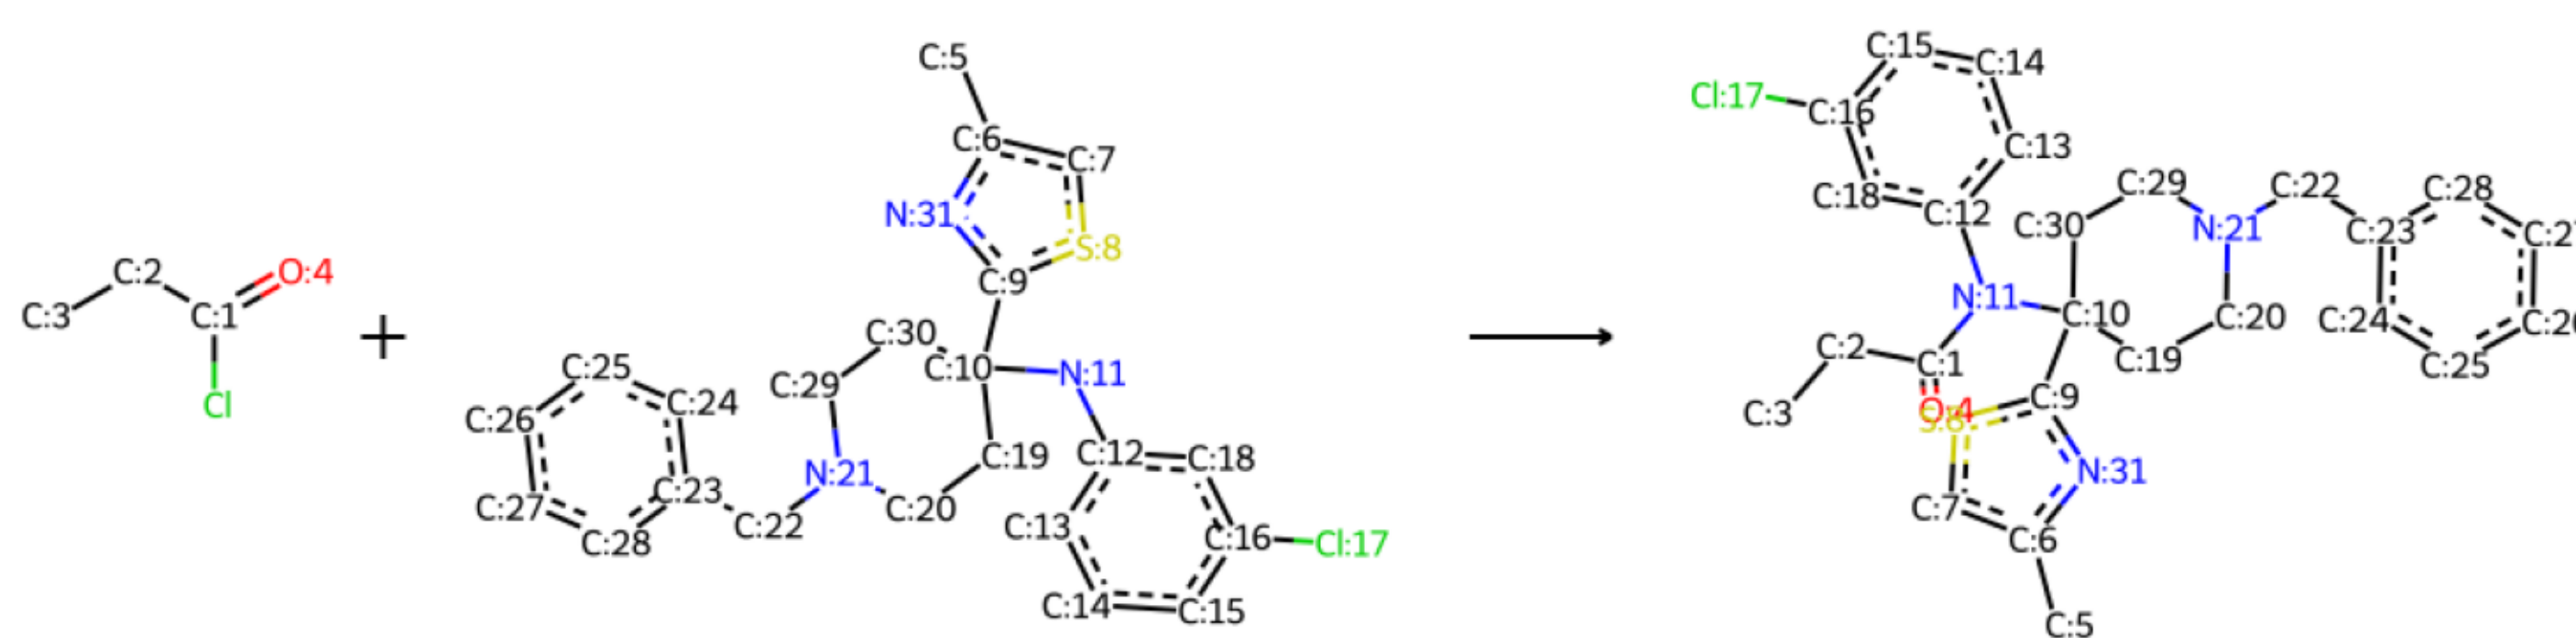

Identified mechanistic class -  
nucleophilic\_attack\_to\_(thio)carbonyl\_or\_sulfonyl reaction

Reaction with missing reagents recovered

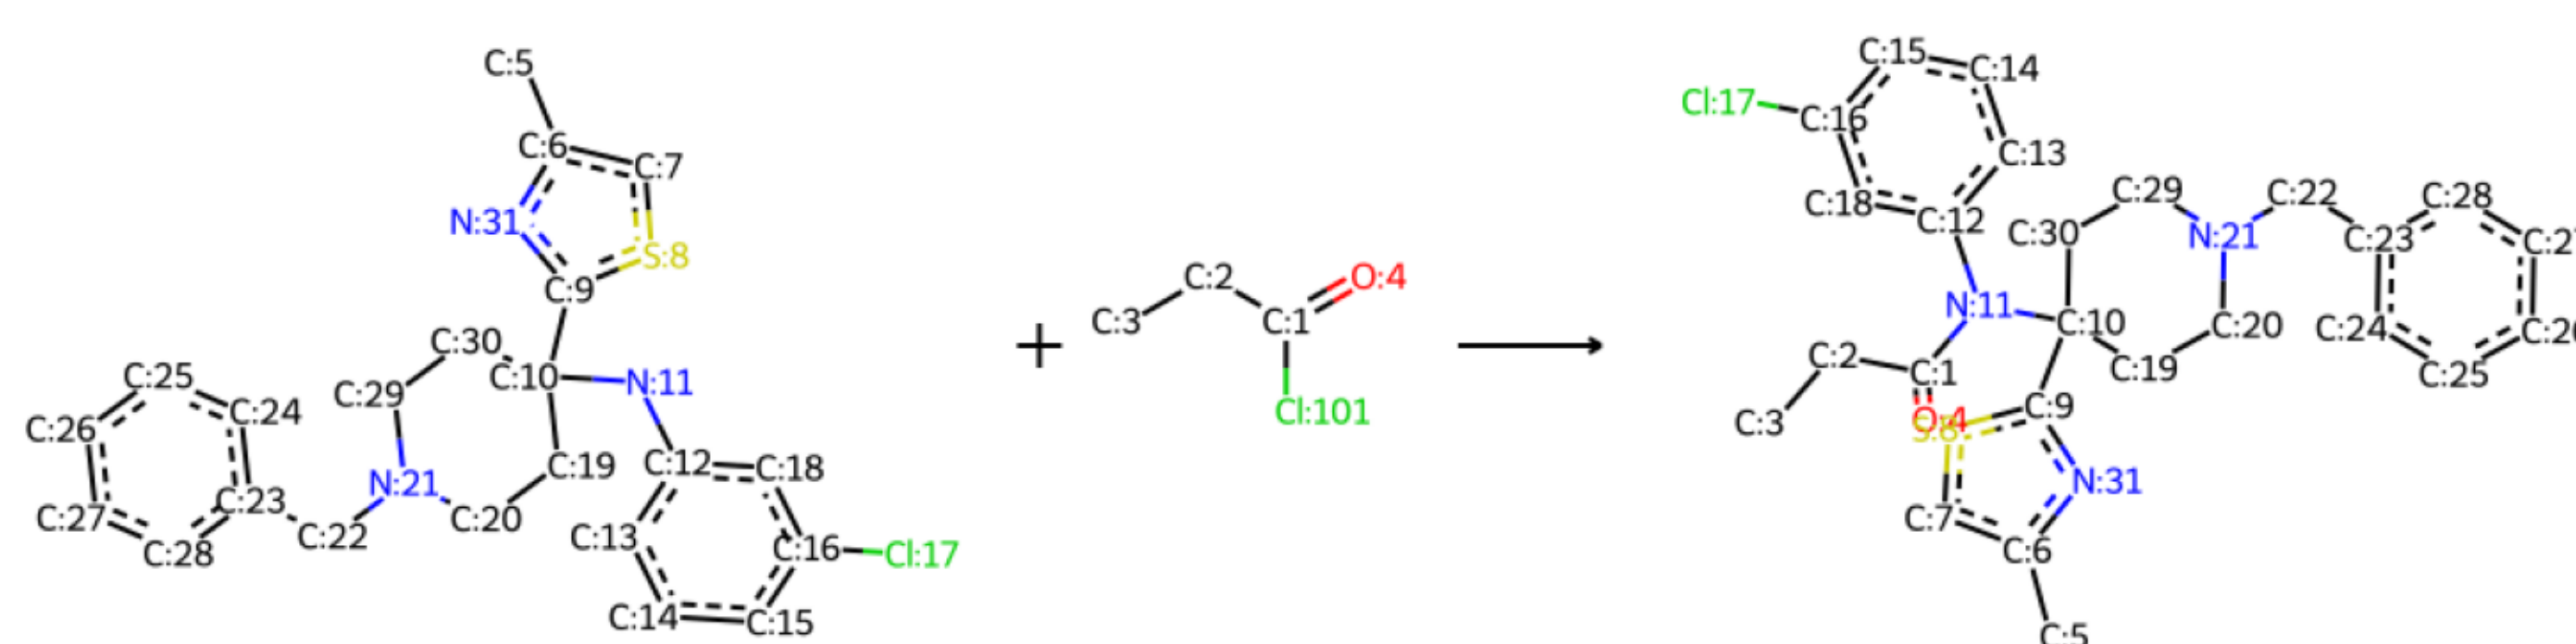

Proposed mechanistic pathway

[Arrow order: (1) green, (2) blue, (3) red, (4) orange]

step #1

step #2

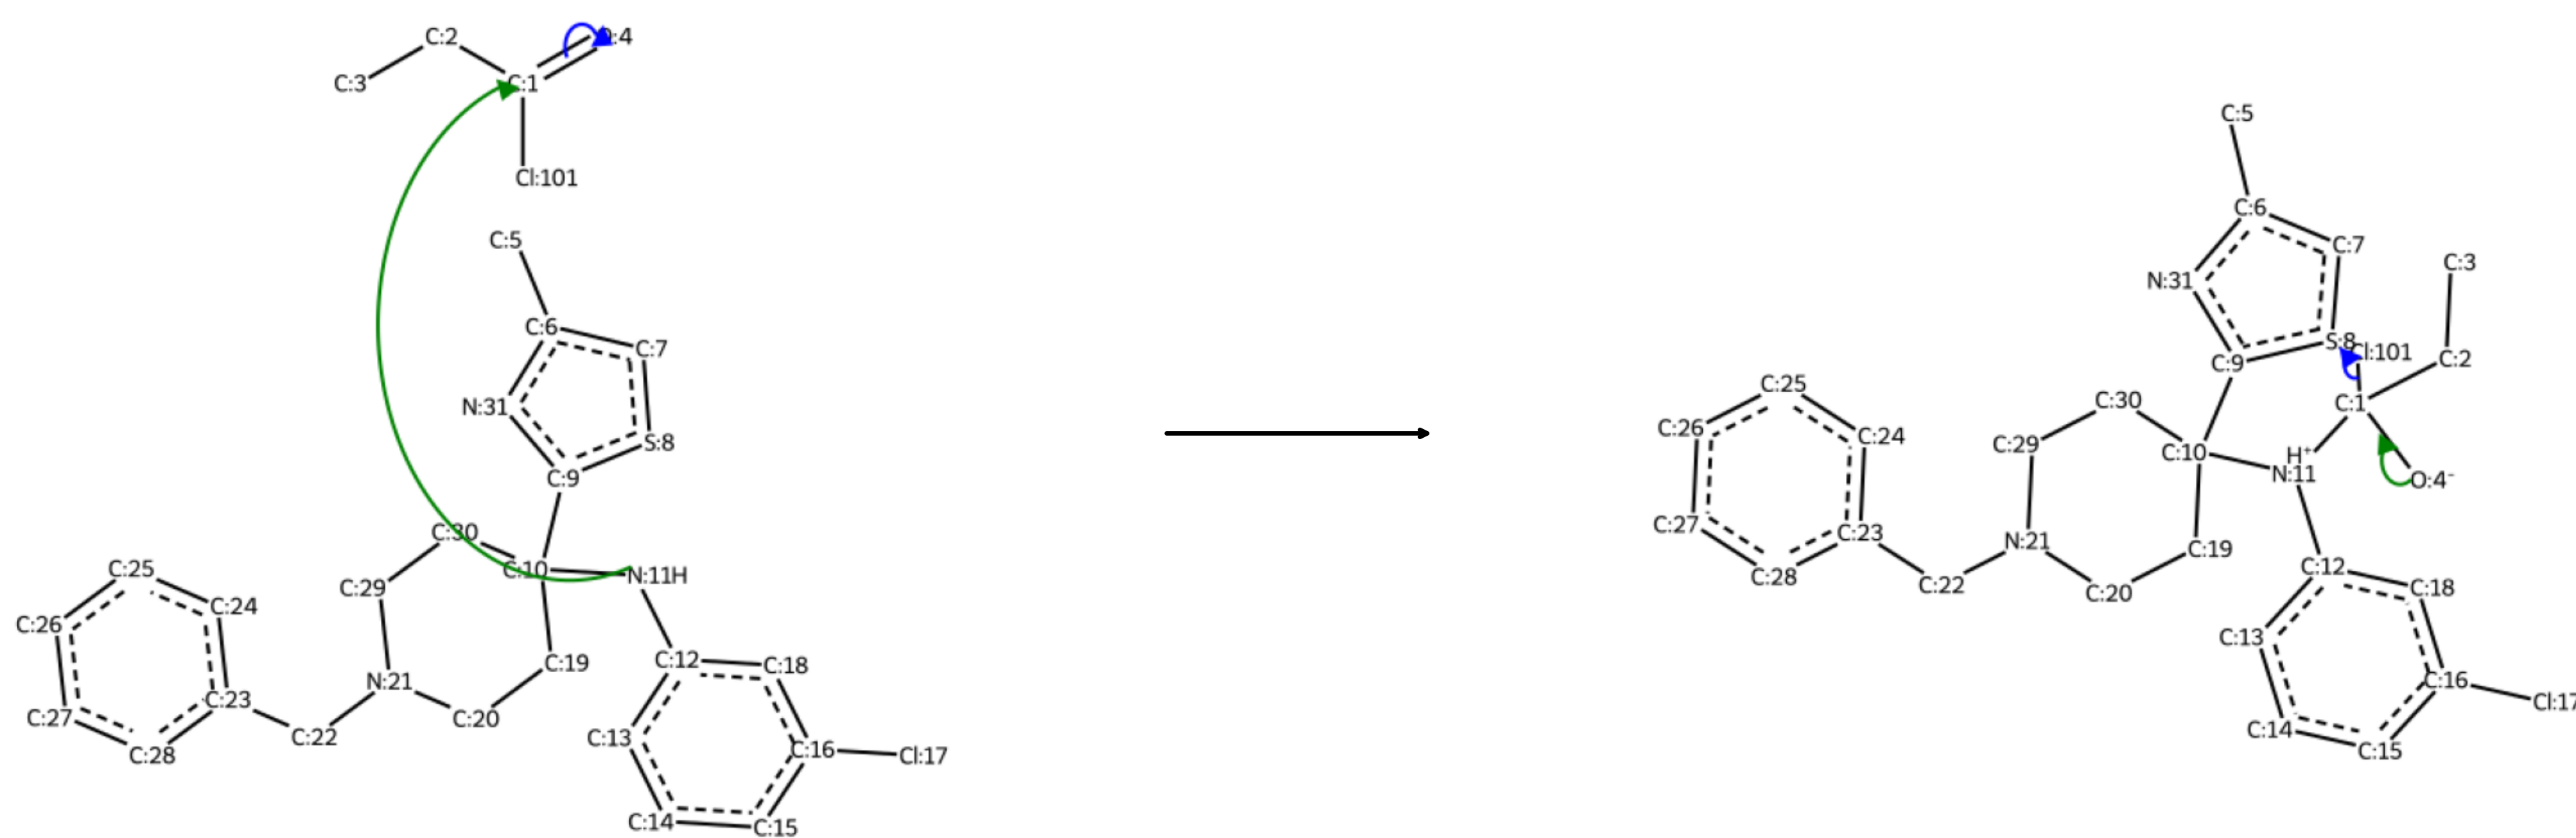

Product(s)

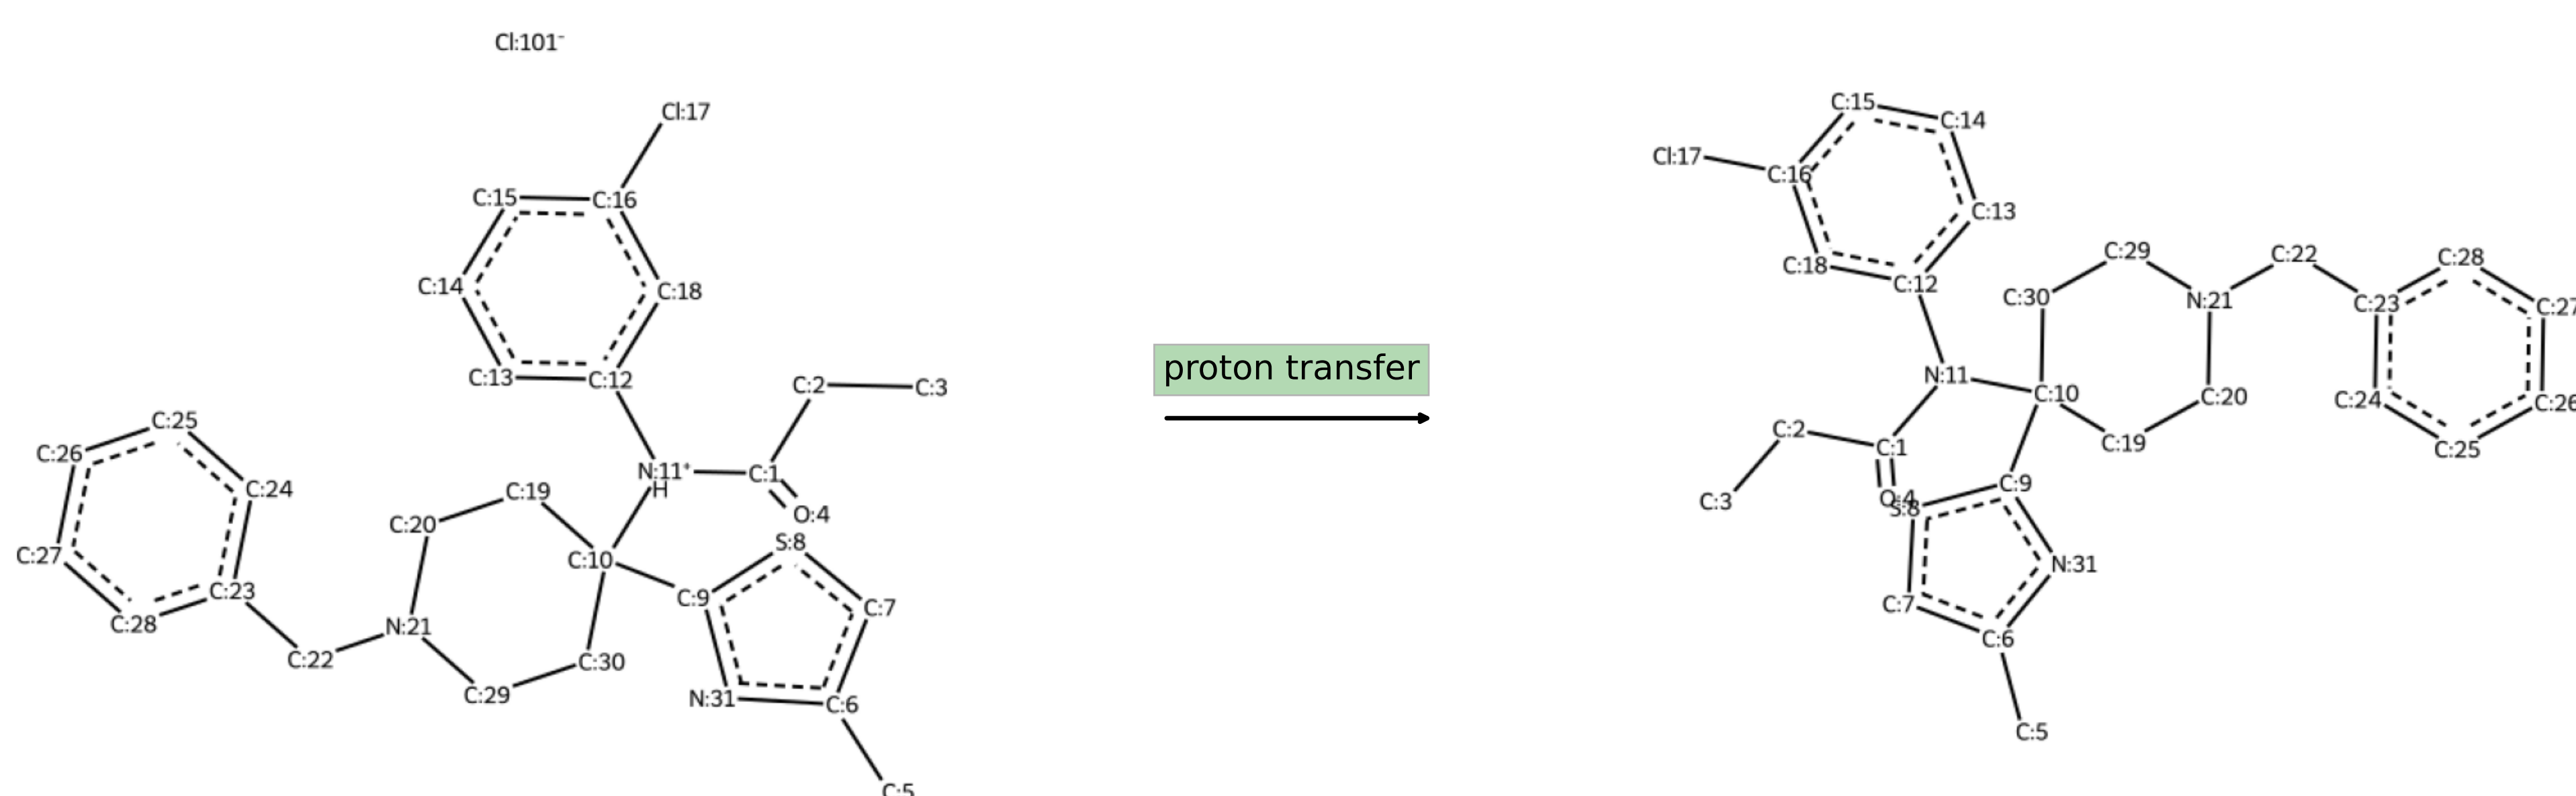

Original reaction  
sampled RXN\_ID:93)

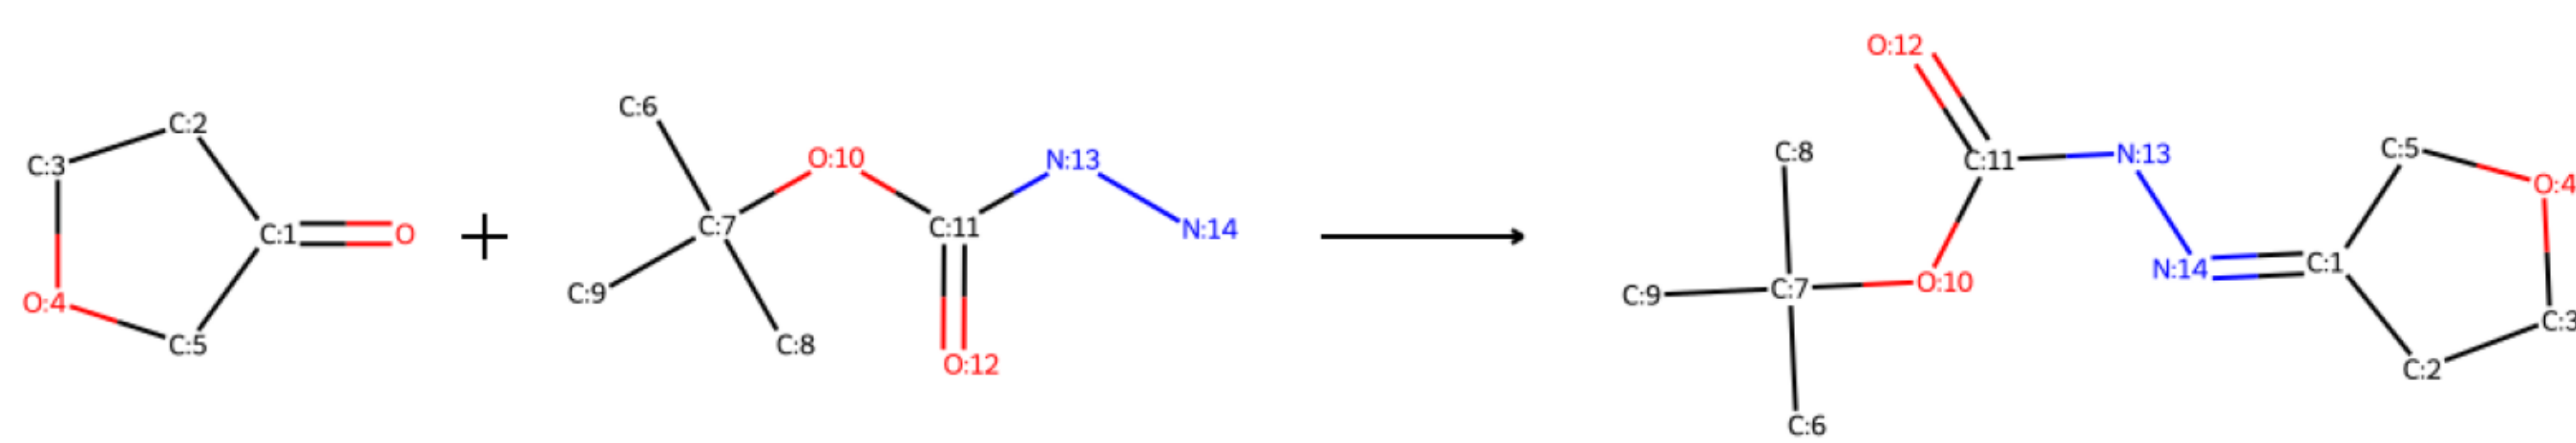

Identified mechanistic class -  
imine\_formation reaction

Reaction with missing reagents recovered

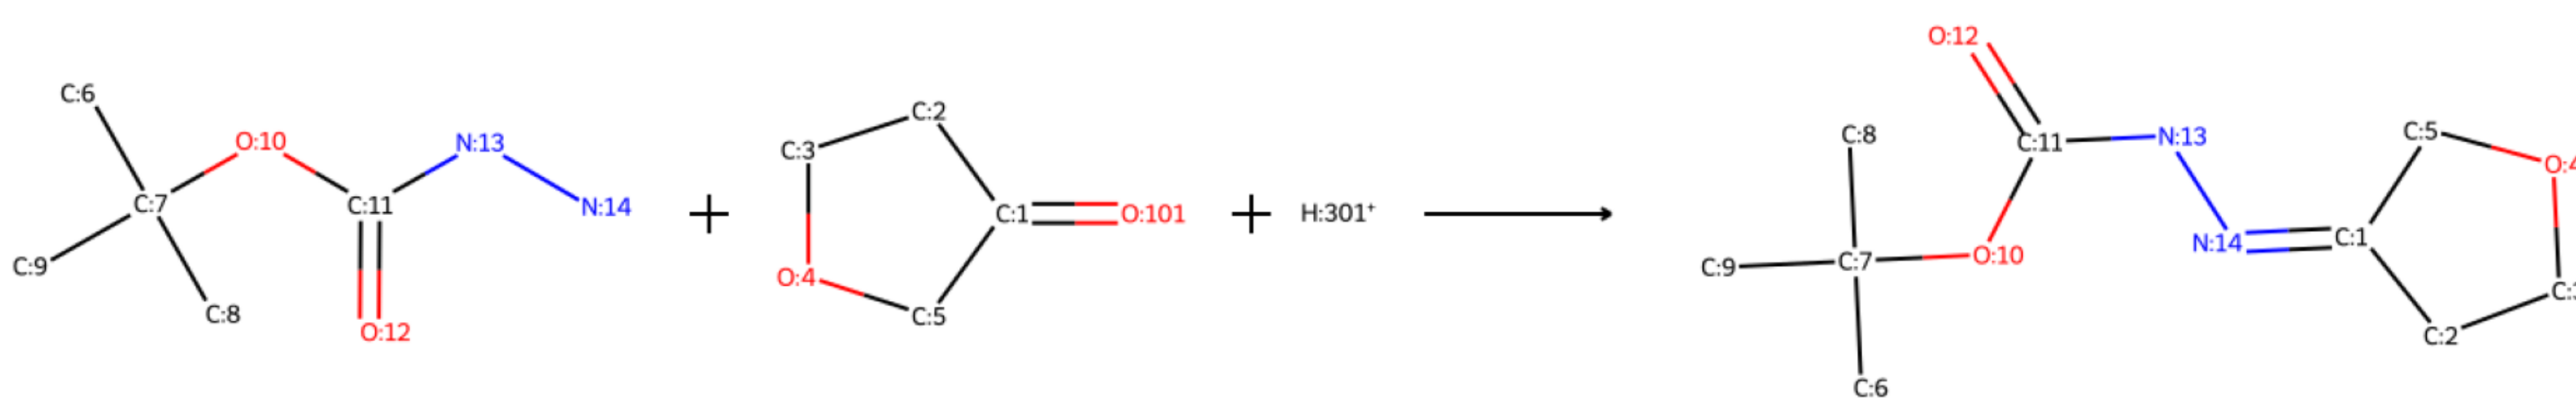

Proposed mechanistic pathway

[Arrow order: (1) green, (2) blue, (3) red, (4) orange]

step #1

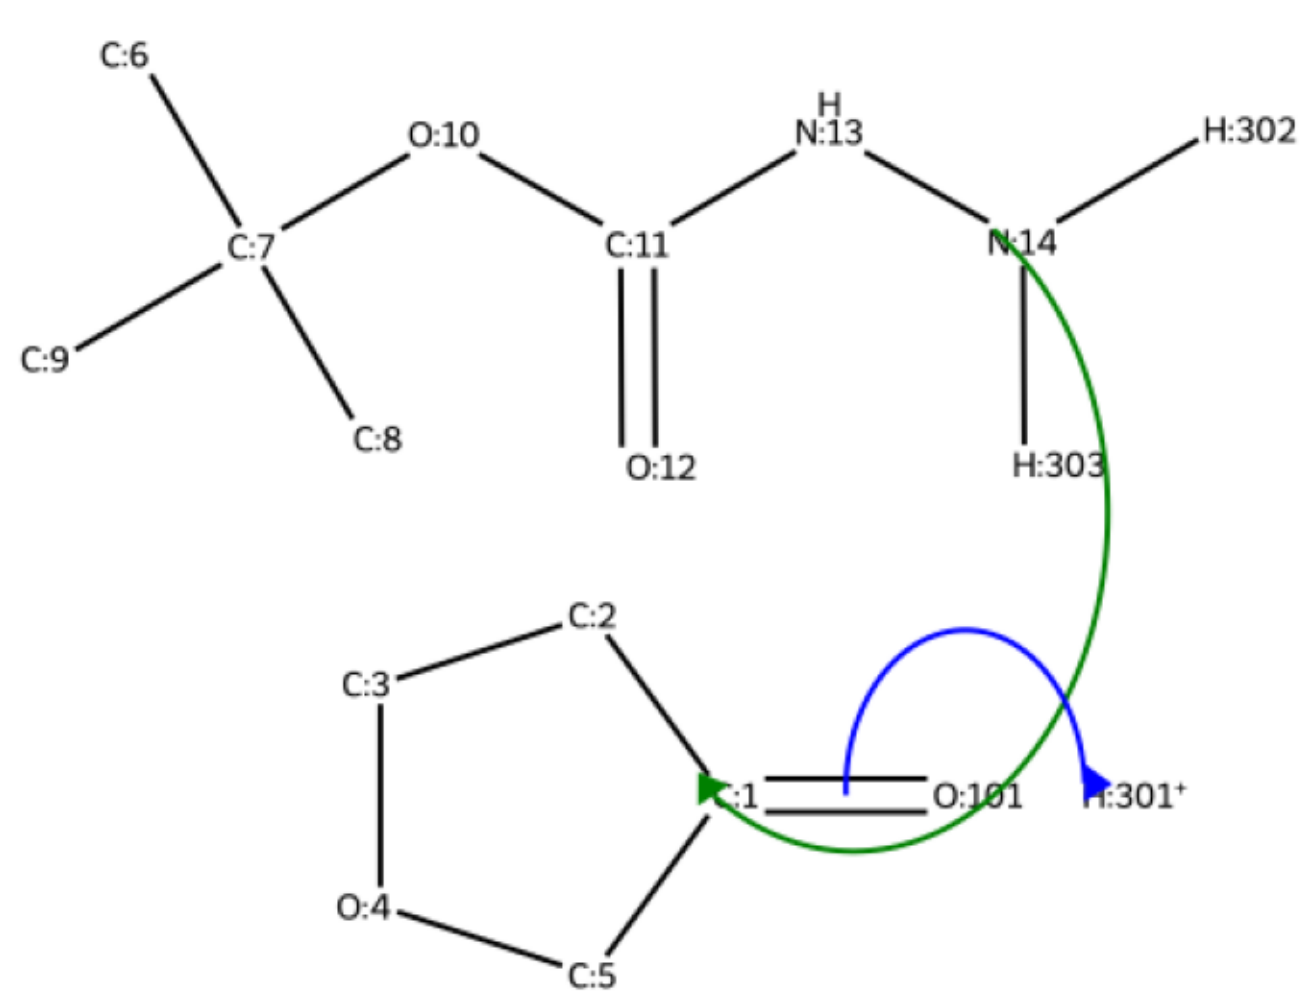

step #2

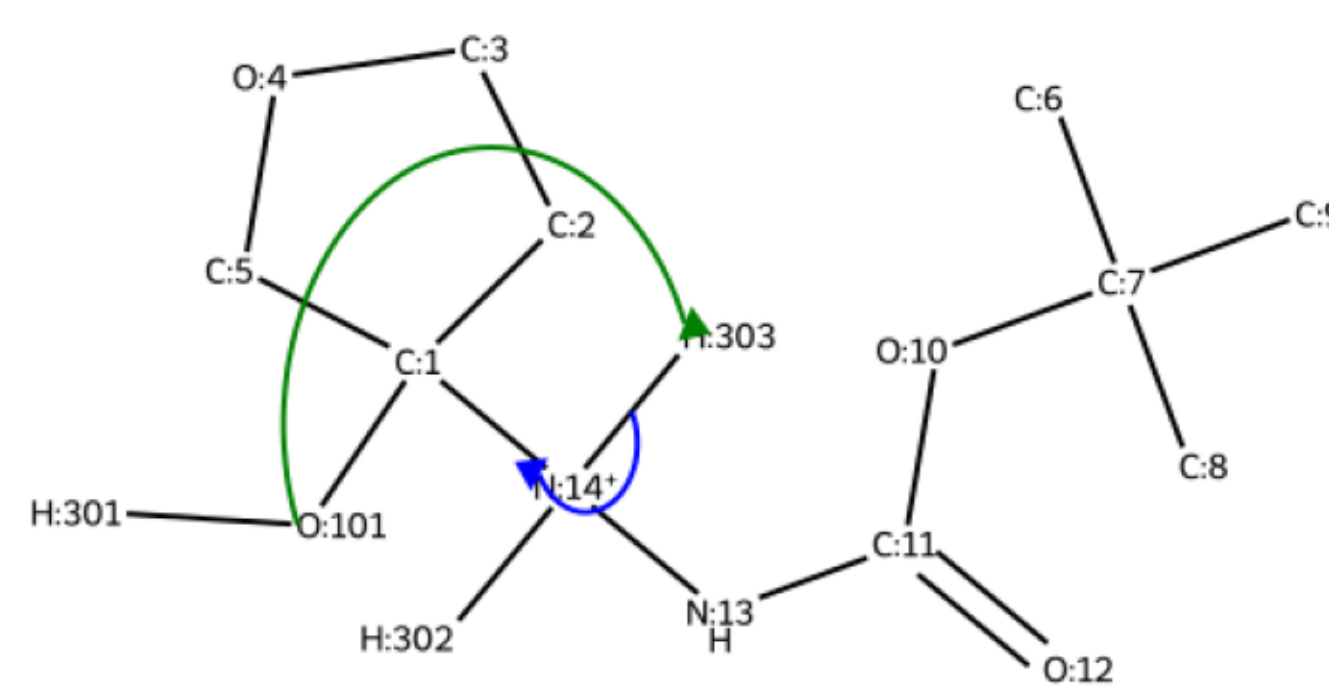

step #3

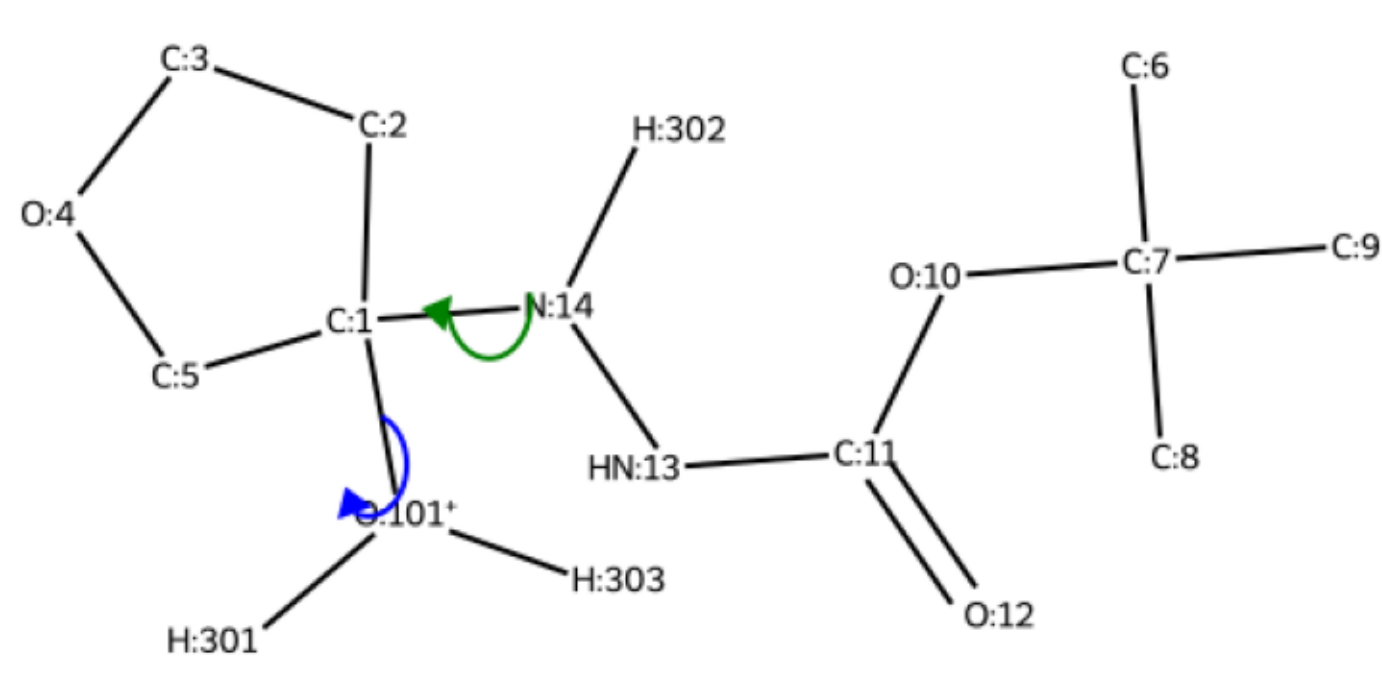

step #4

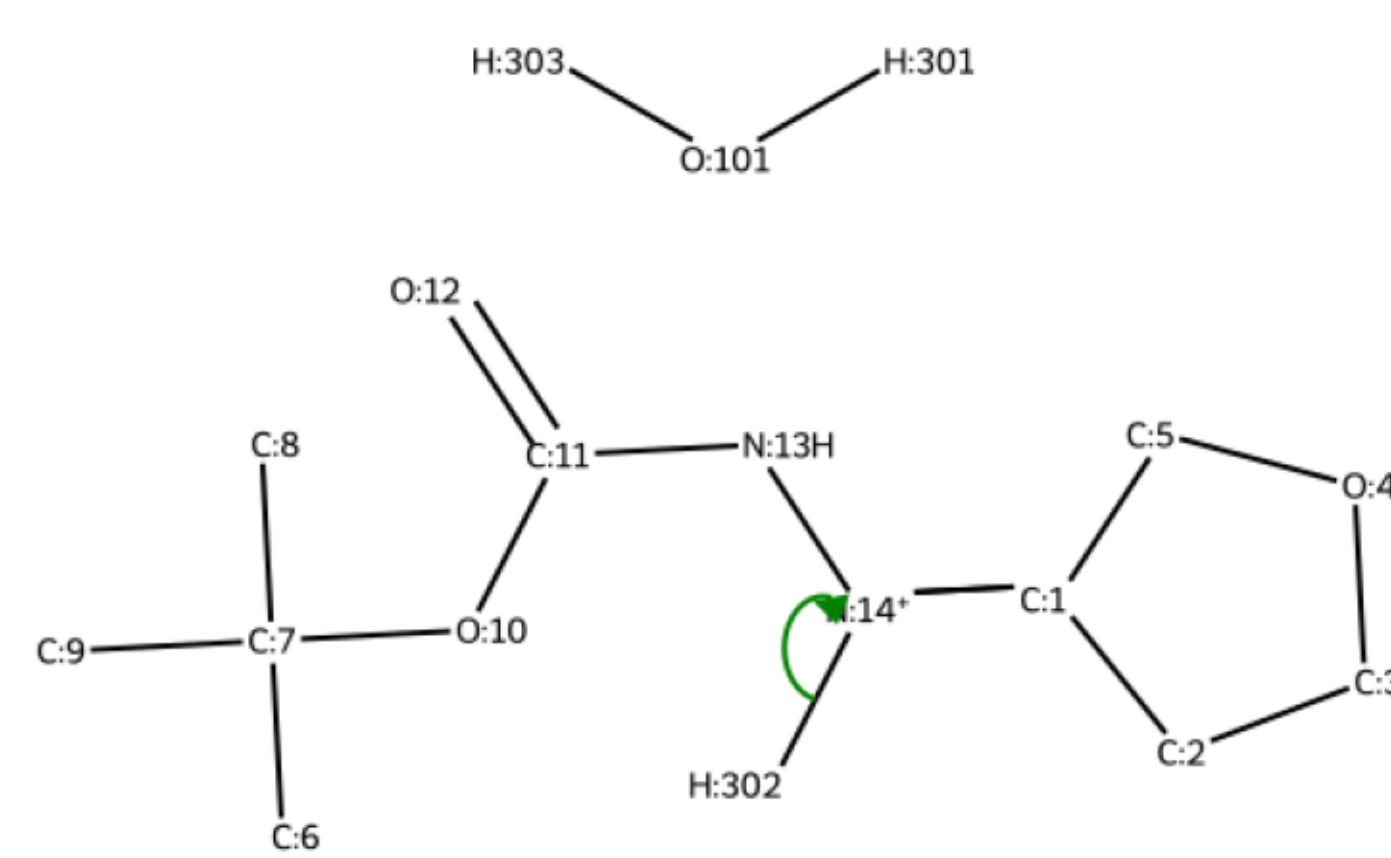

Product(s)

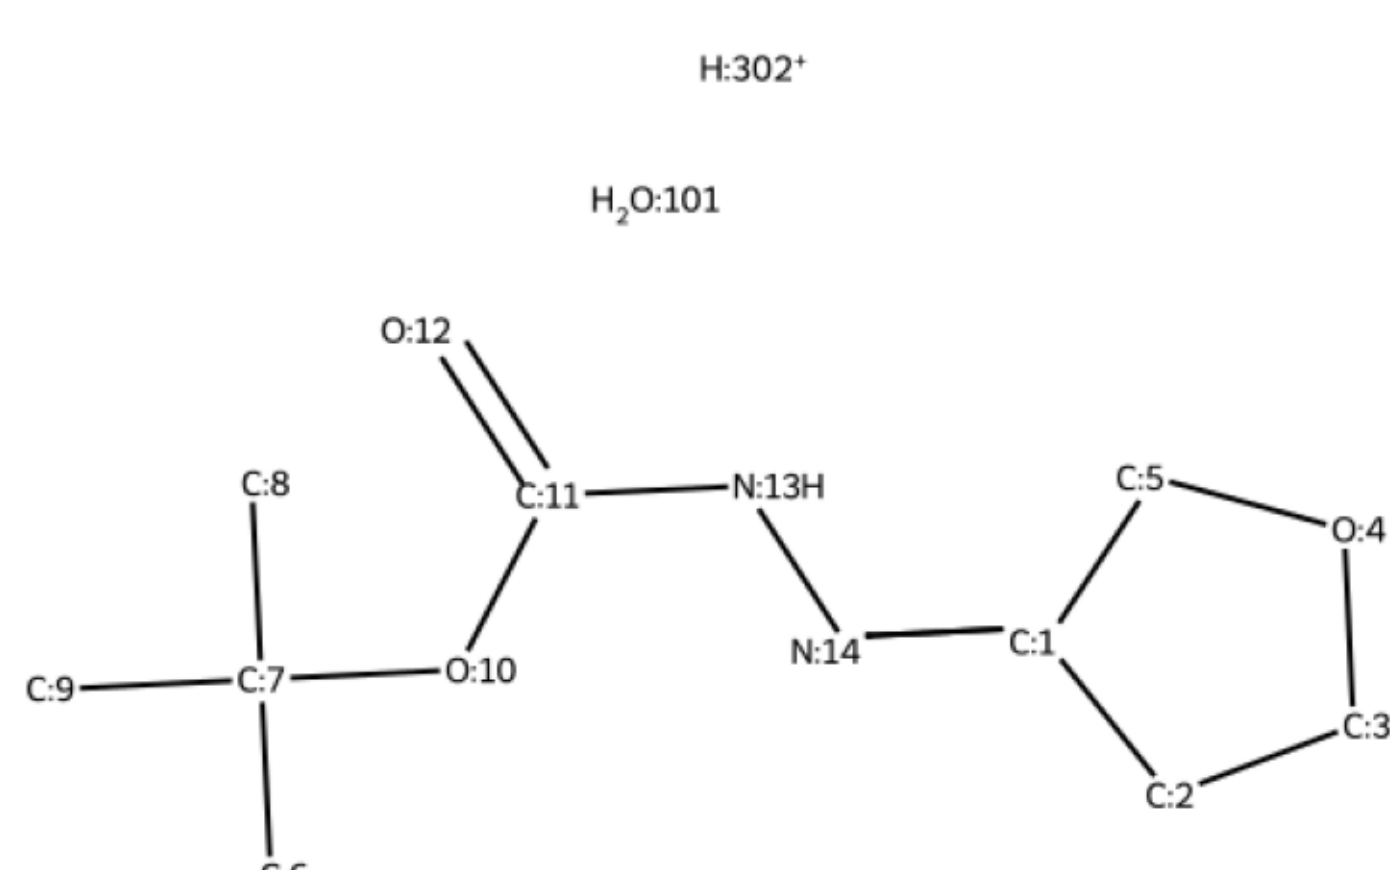



Original reaction  
sampled RXN\_ID:94)

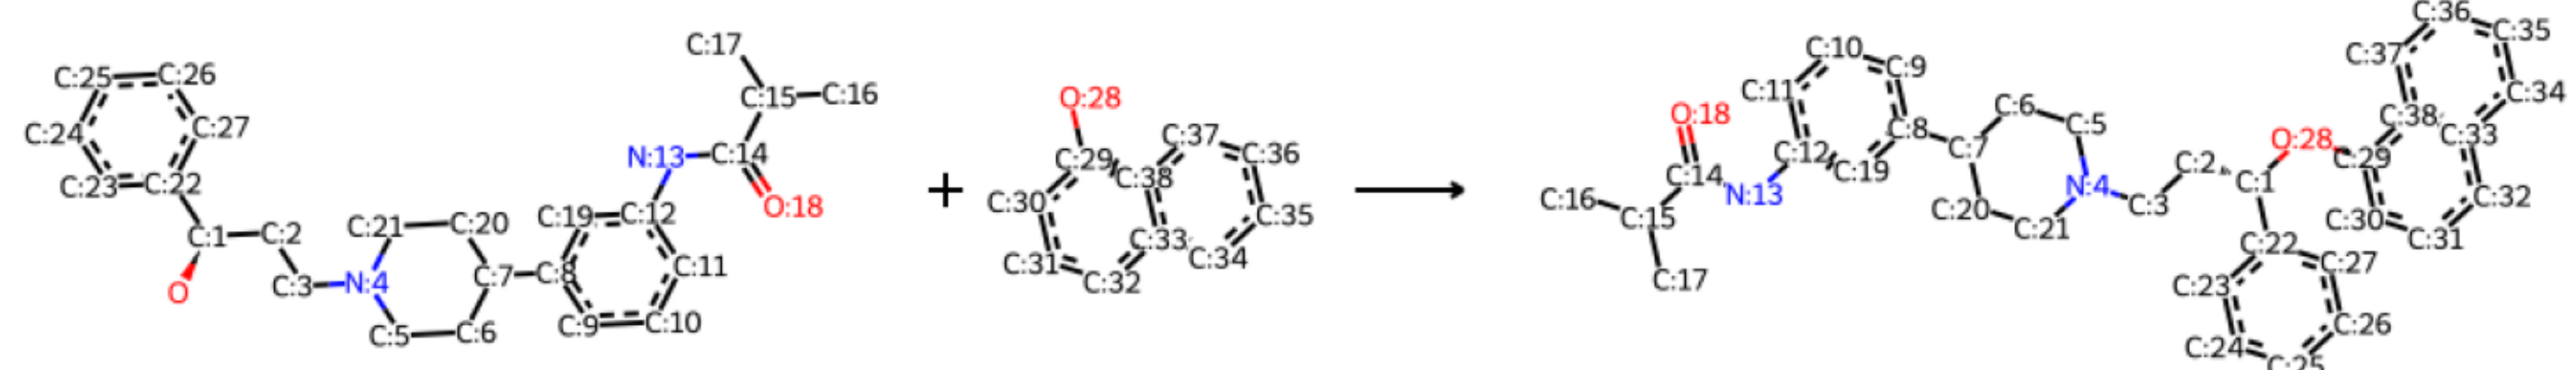

Identified mechanistic class -  
Mitsunobu reaction

Reaction with missing reagents recovered

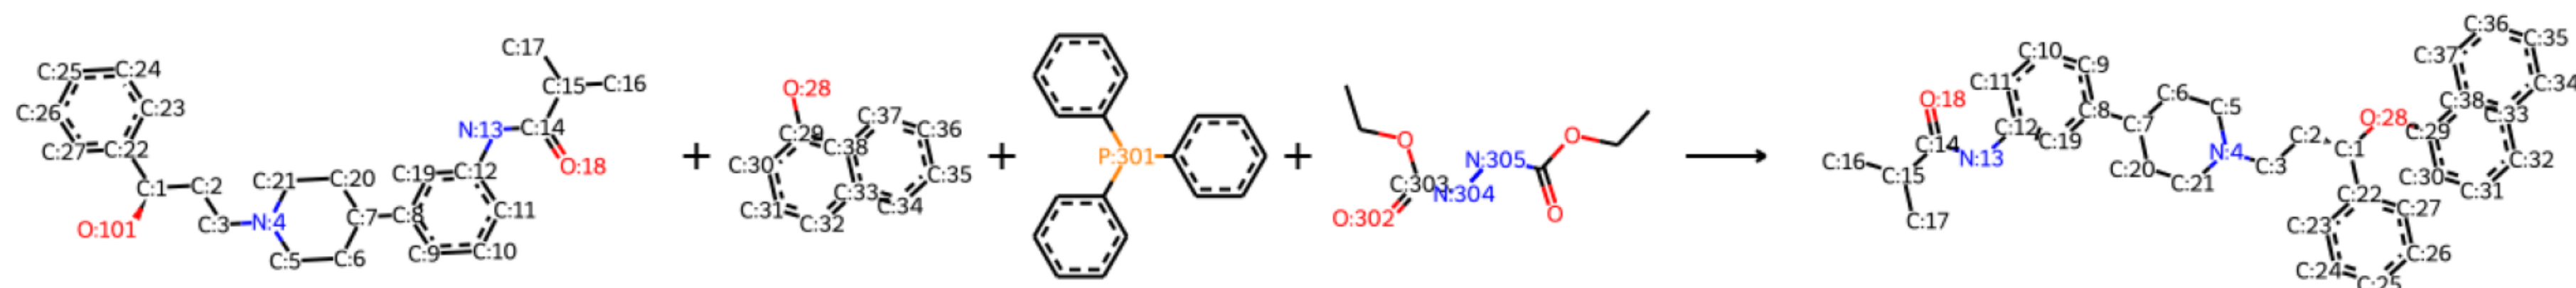

Proposed mechanistic pathway

[Arrow order: (1) green, (2) blue, (3) red, (4) orange]

step #1

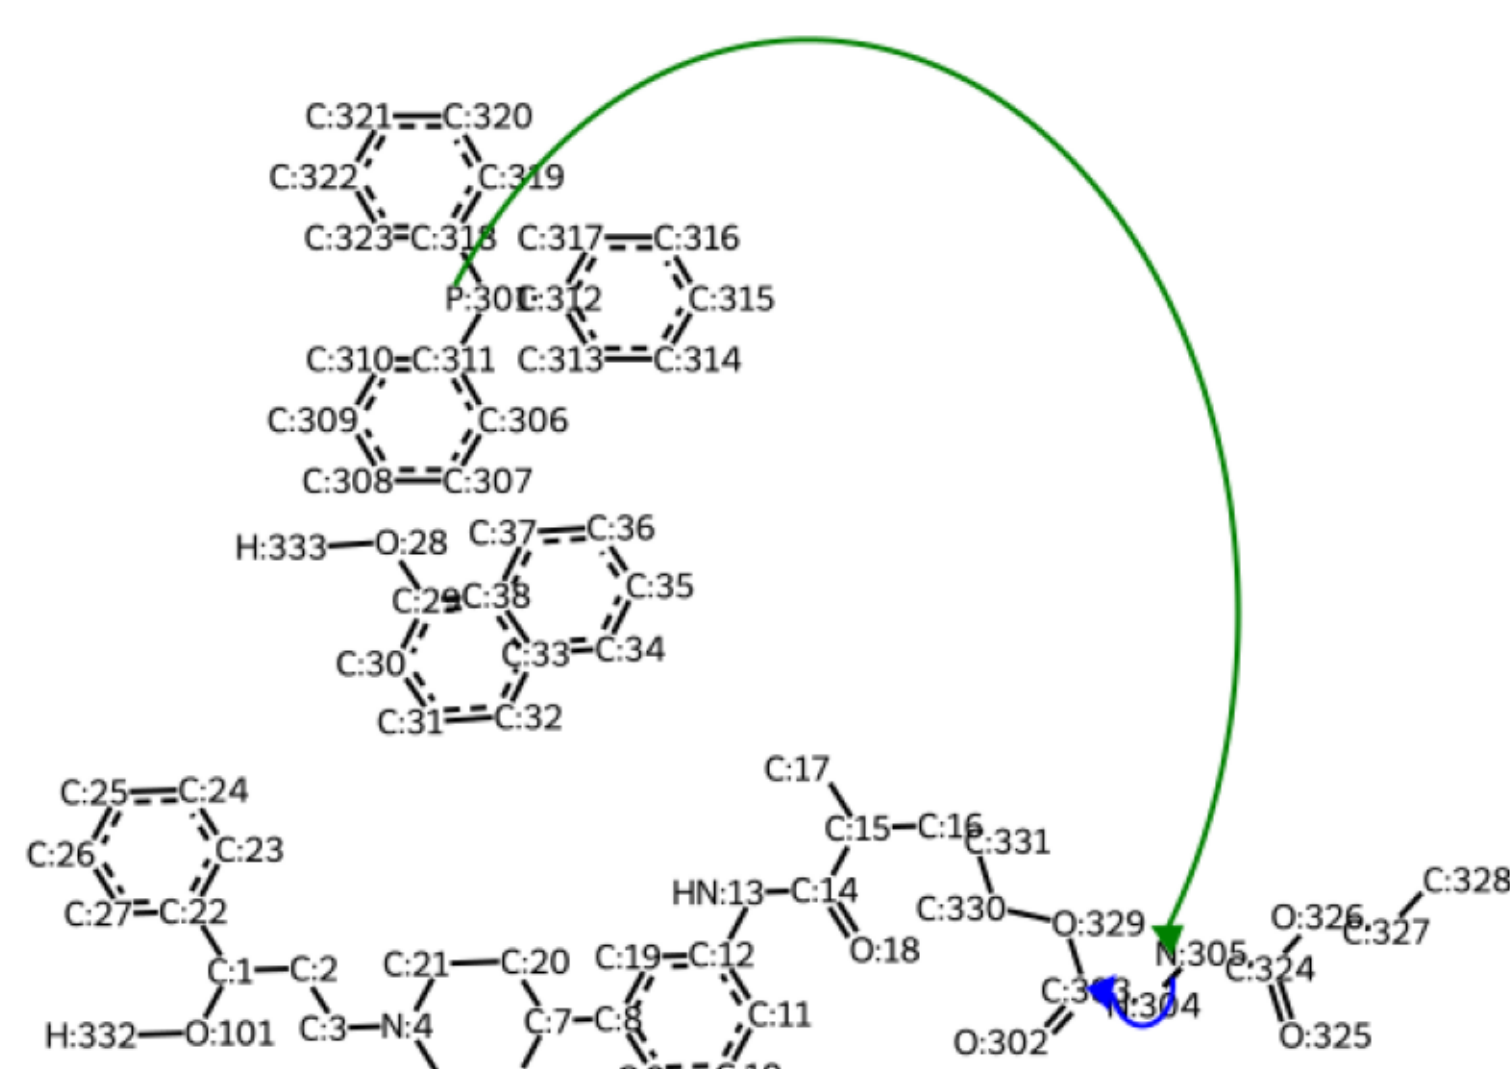

step #2

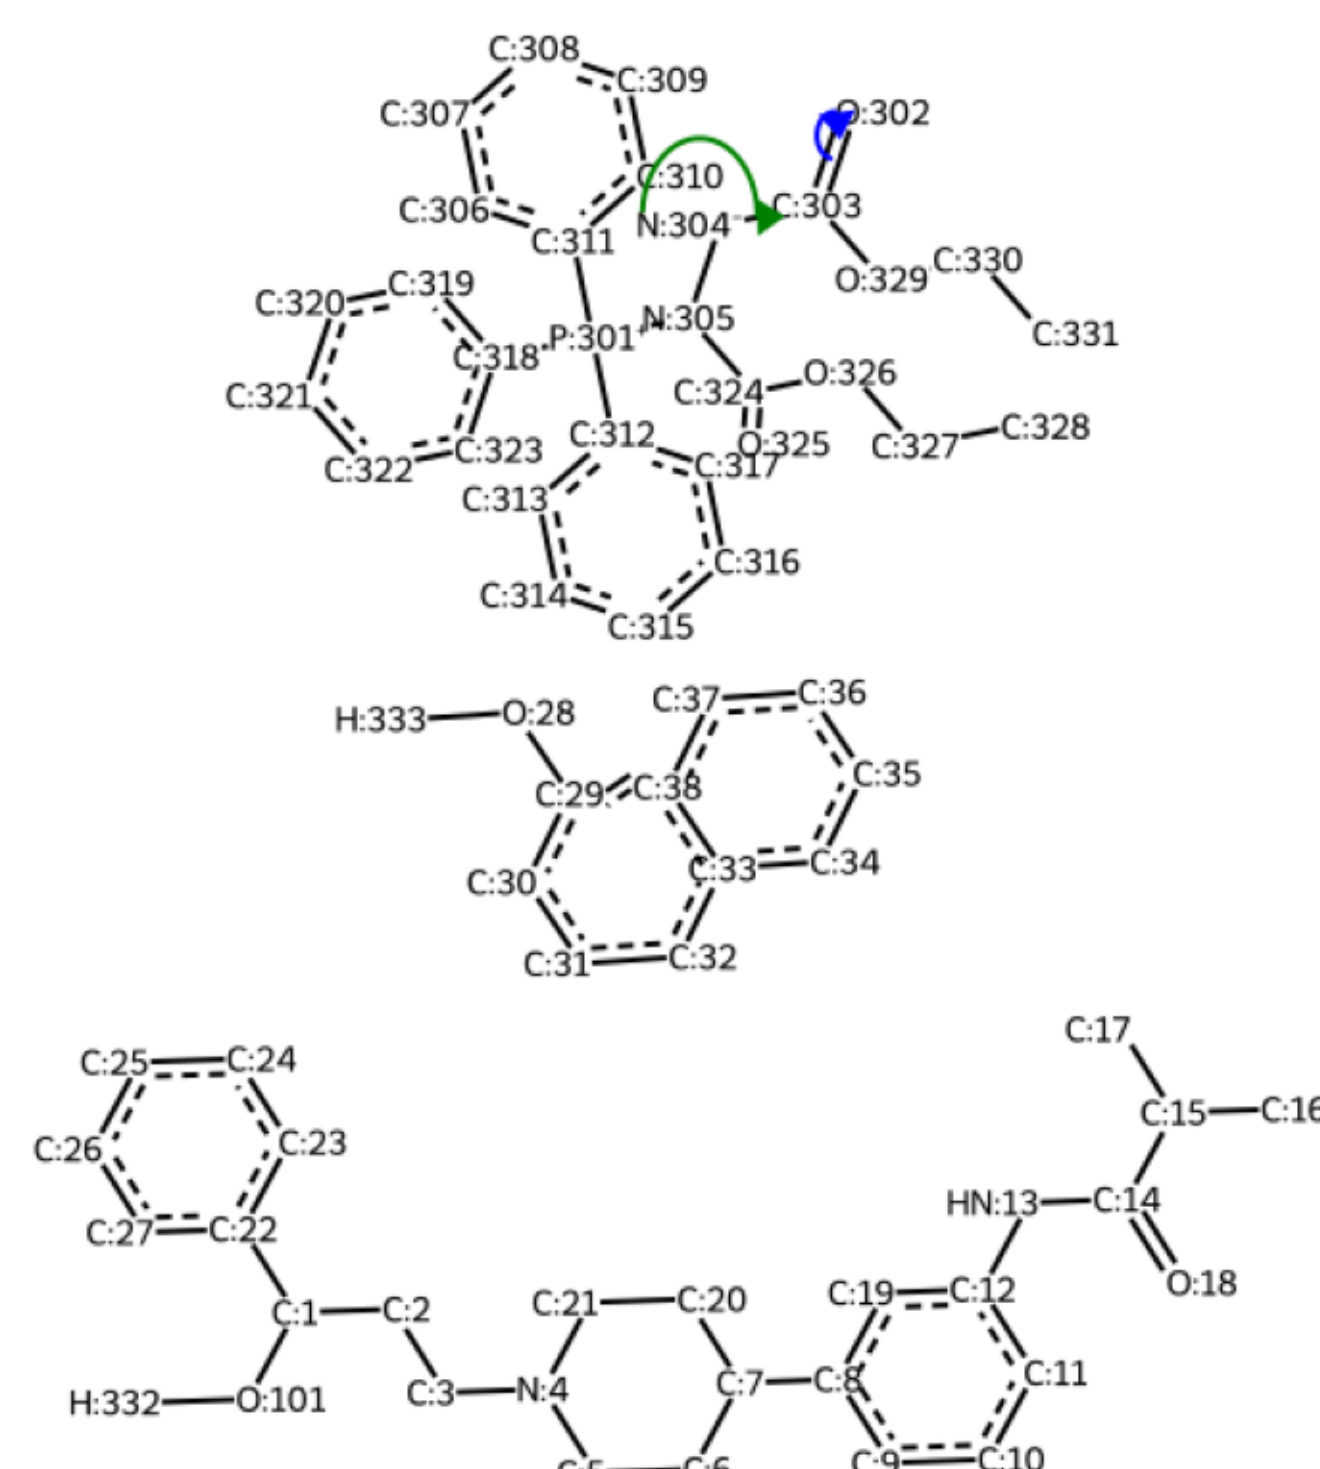

step #3

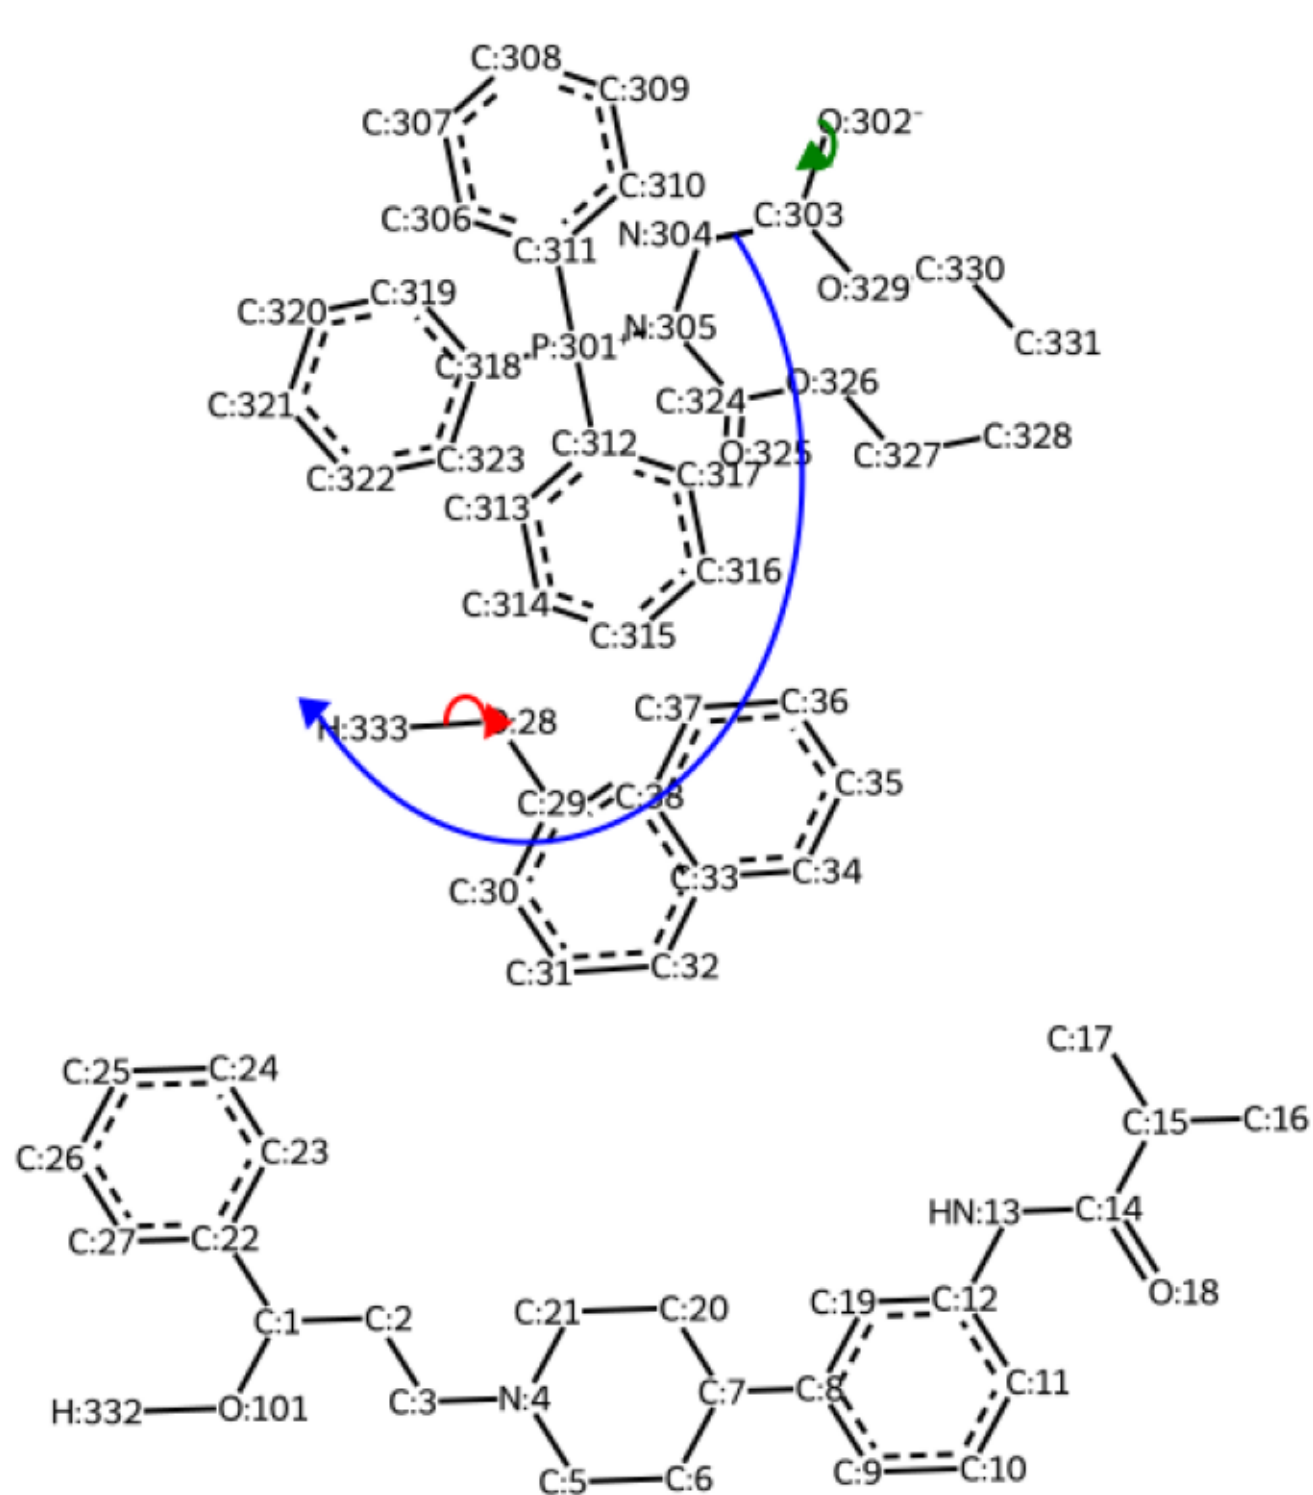

step #4

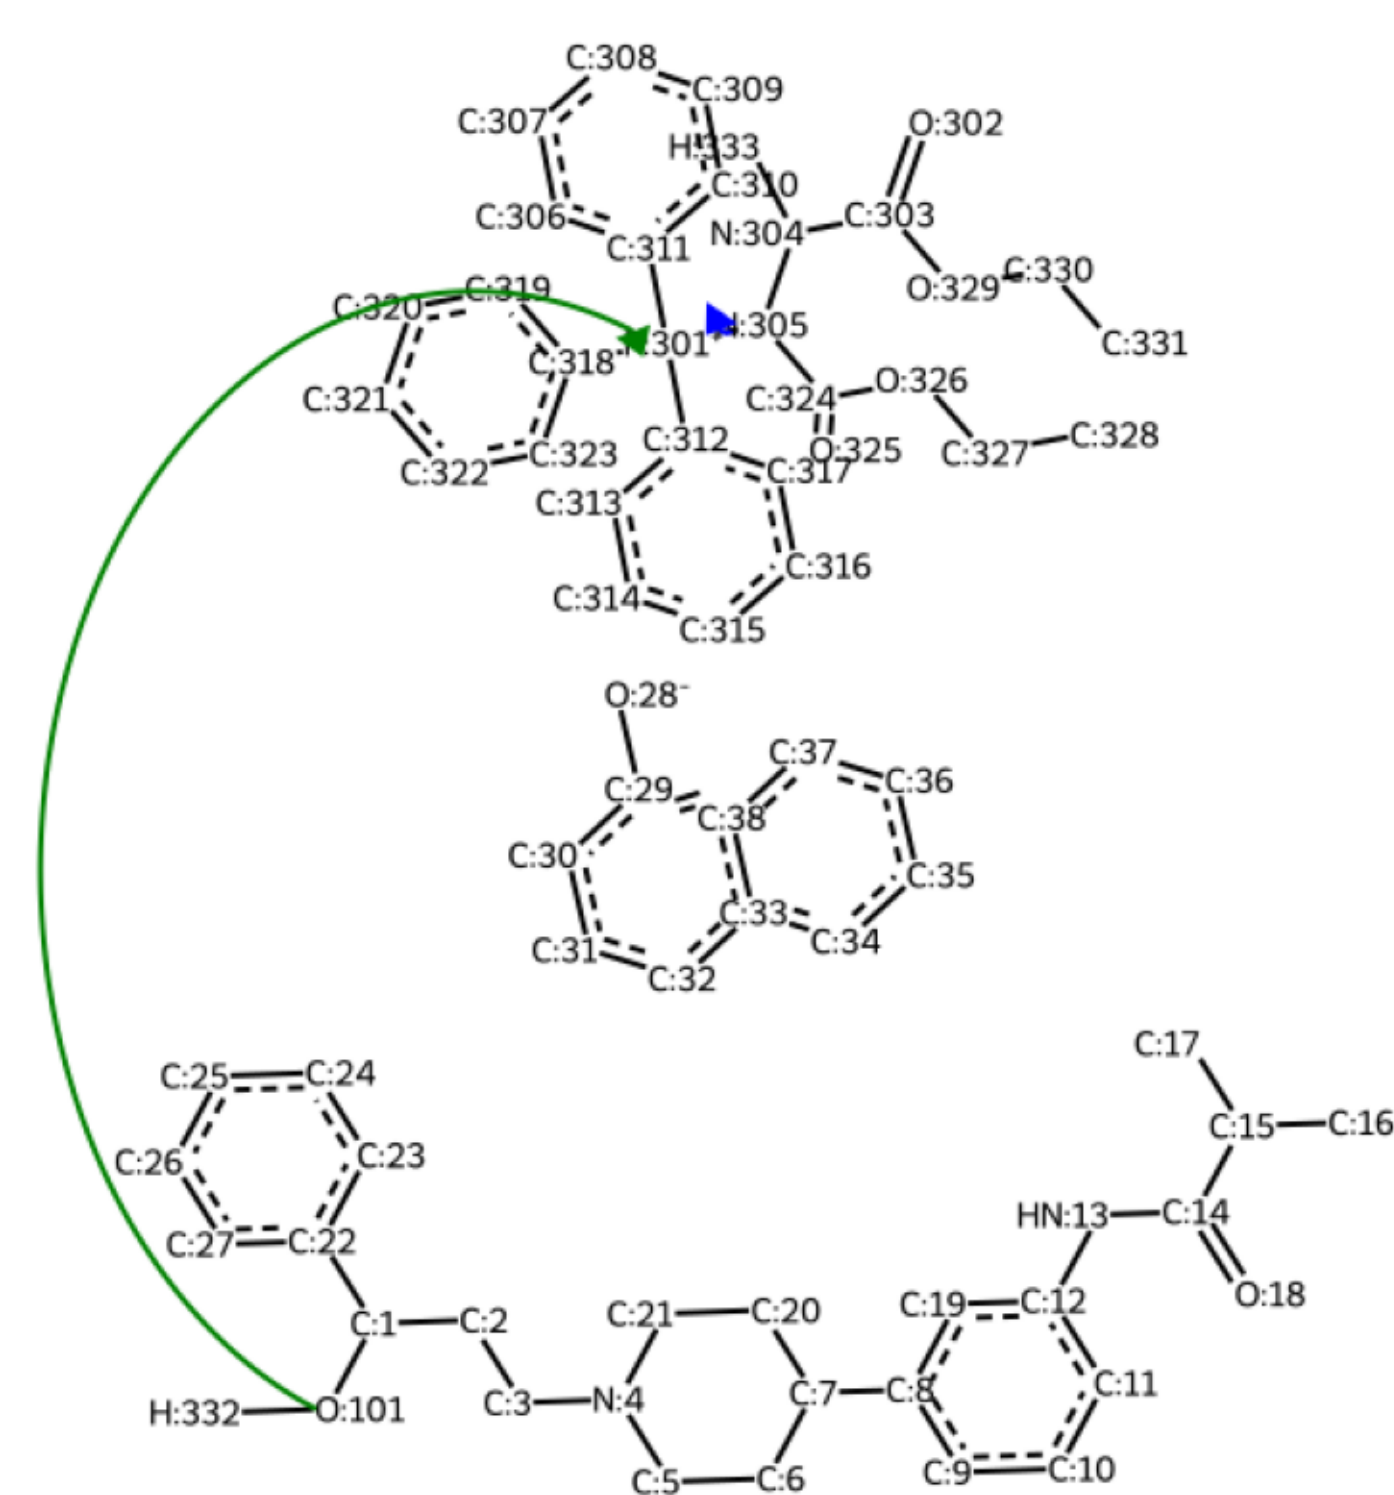

step #5

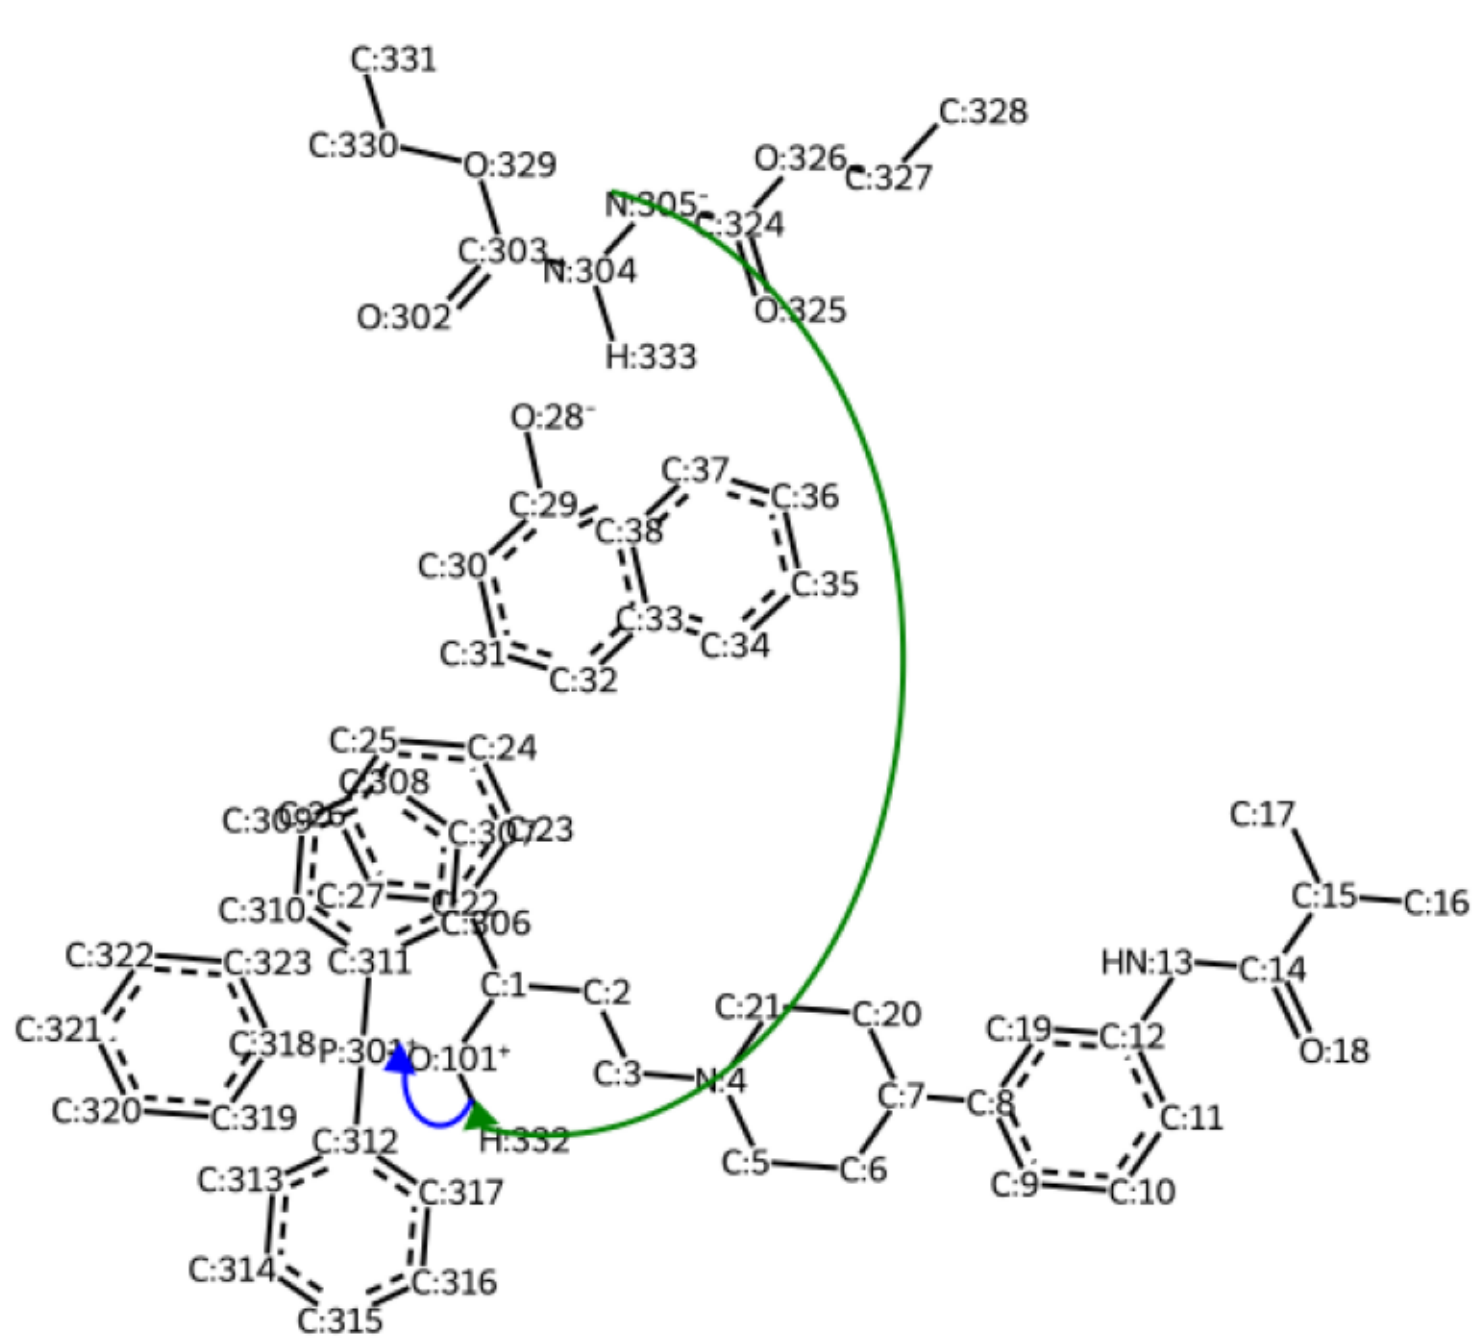

step #6

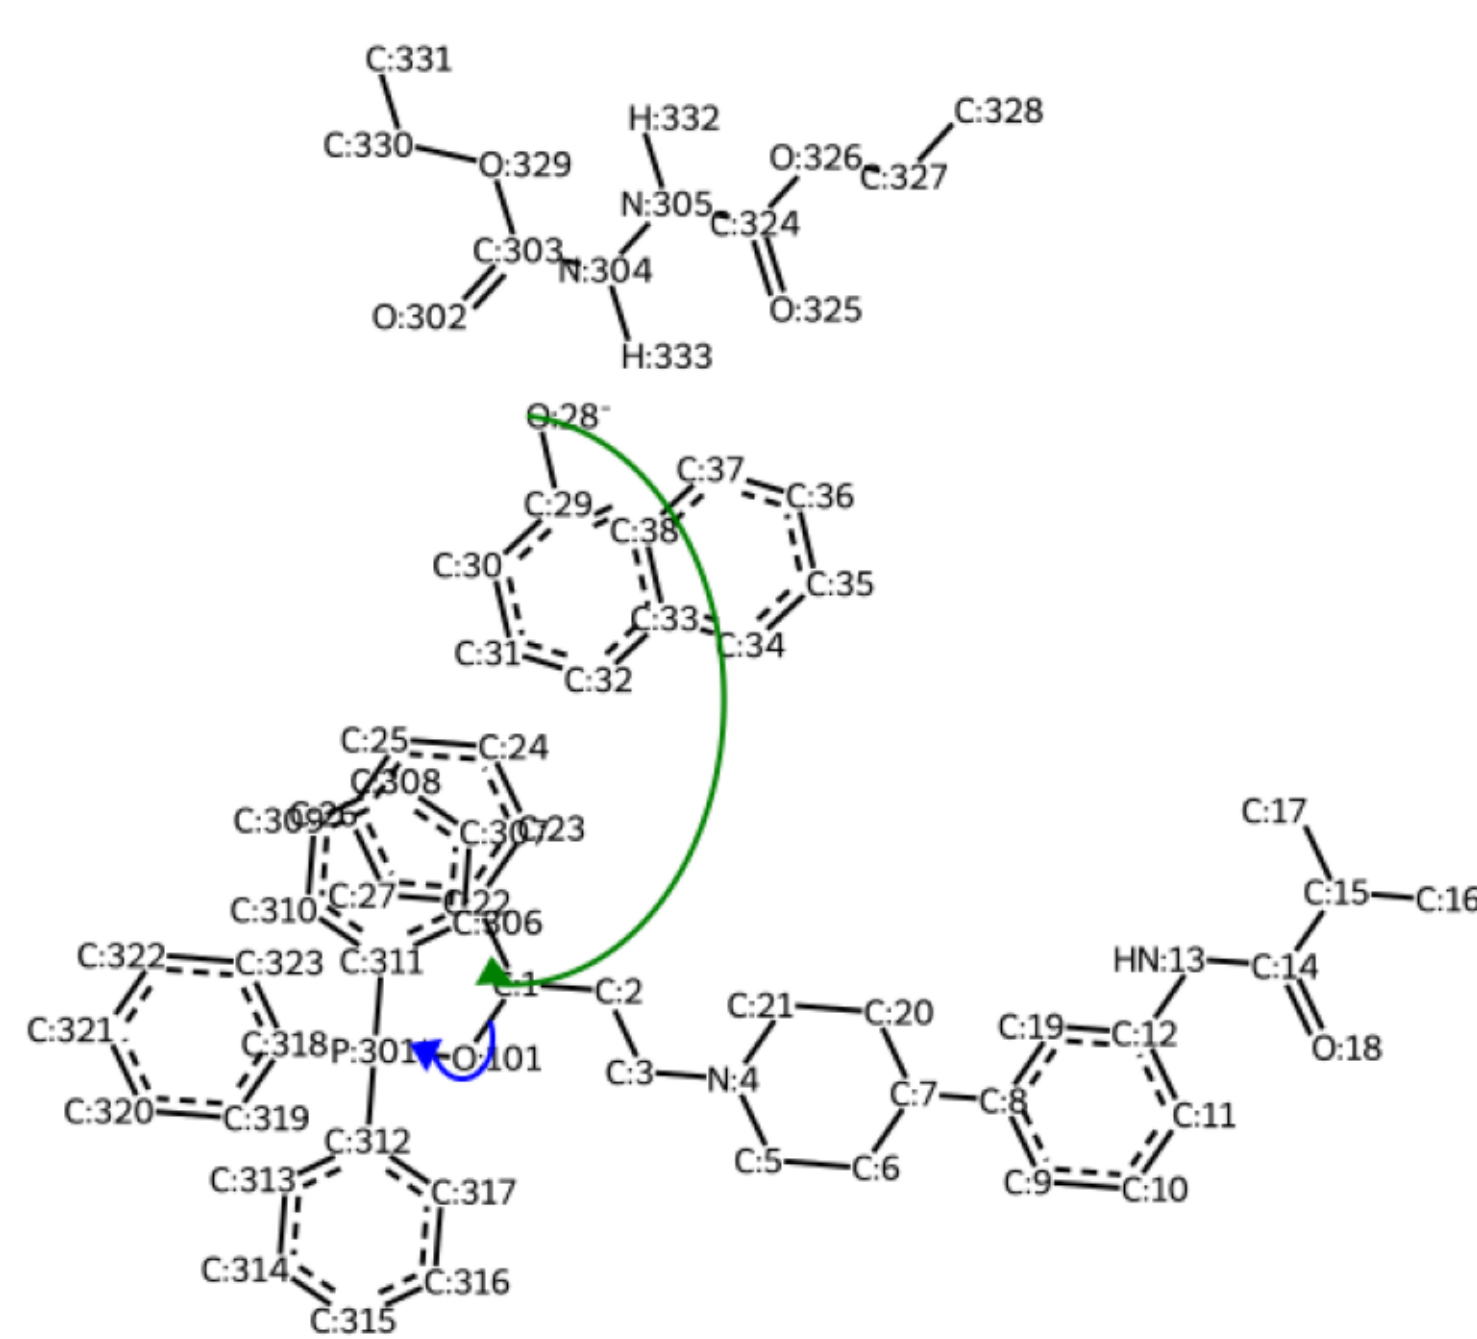

Product(s)

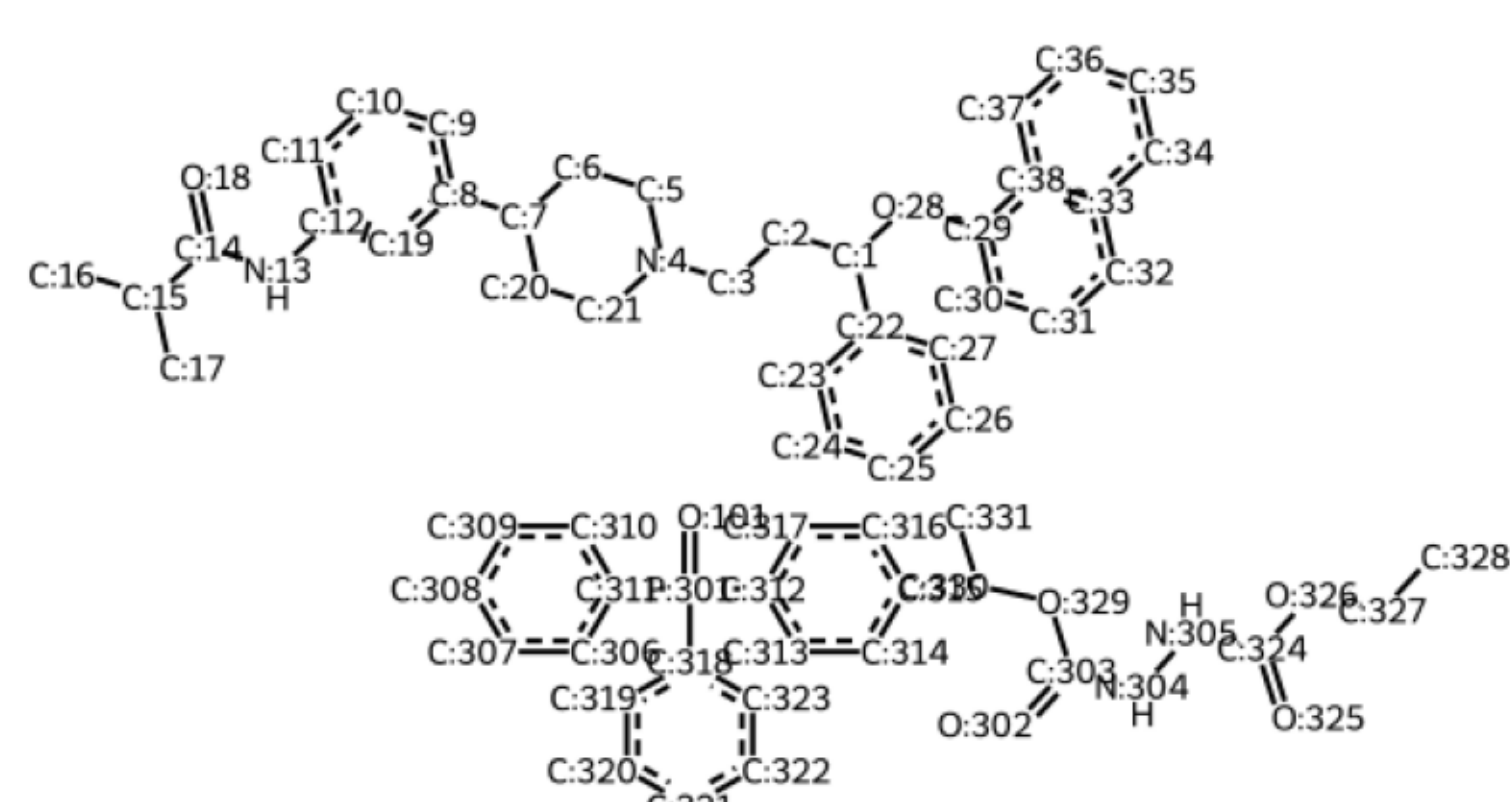



Original reaction  
sampled RXN\_ID:95)

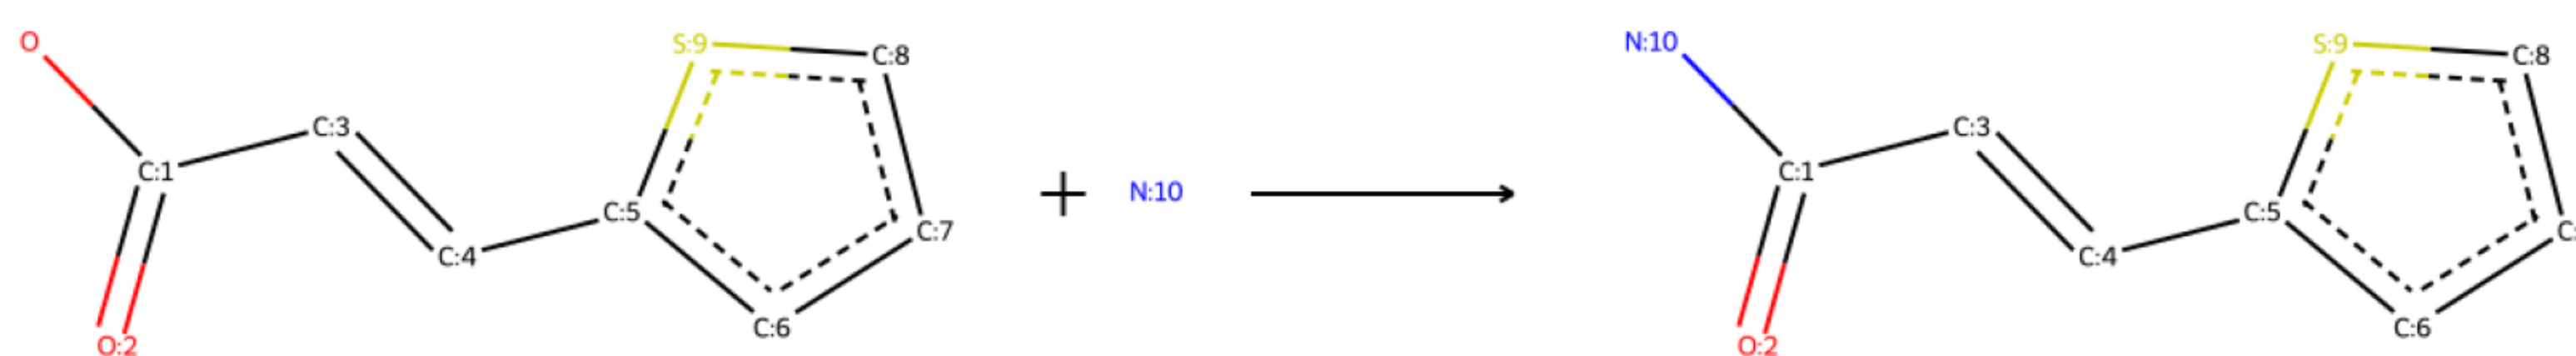

Identified mechanistic class -  
DCC\_condensation reaction

Reaction with missing reagents recovered

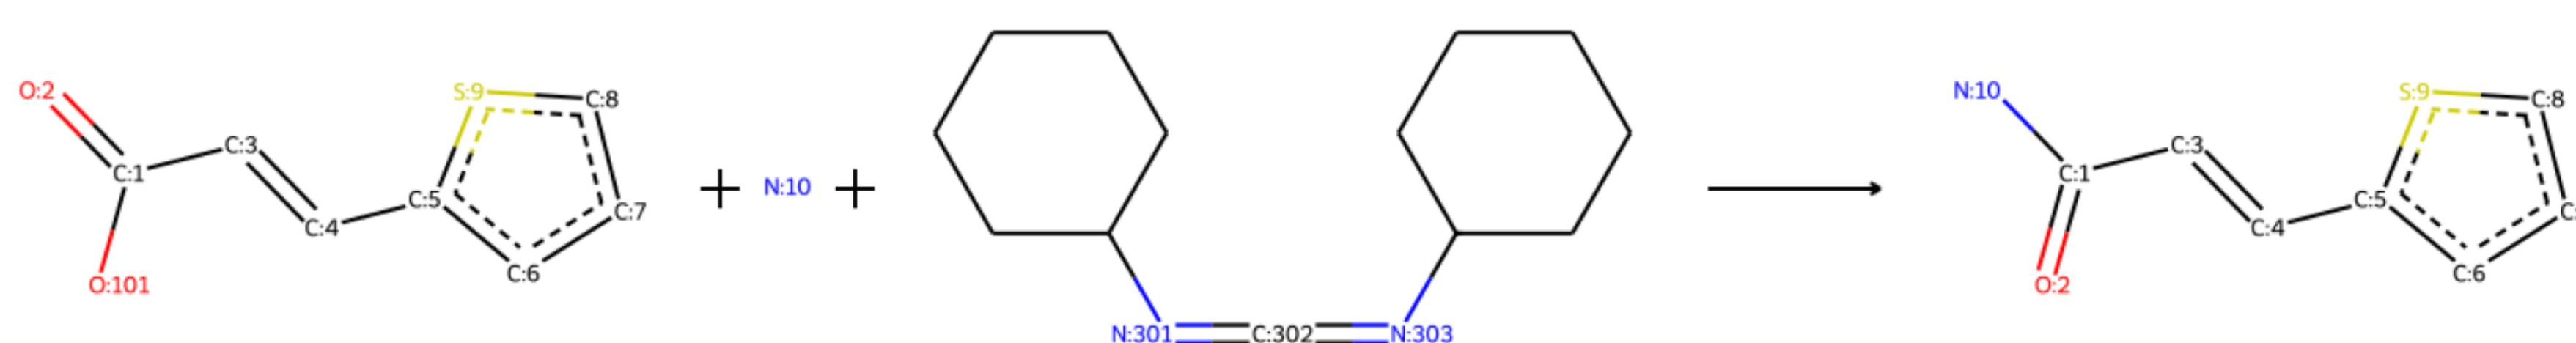

Proposed mechanistic pathway

[Arrow order: (1) green, (2) blue, (3) red, (4) orange]

step #1

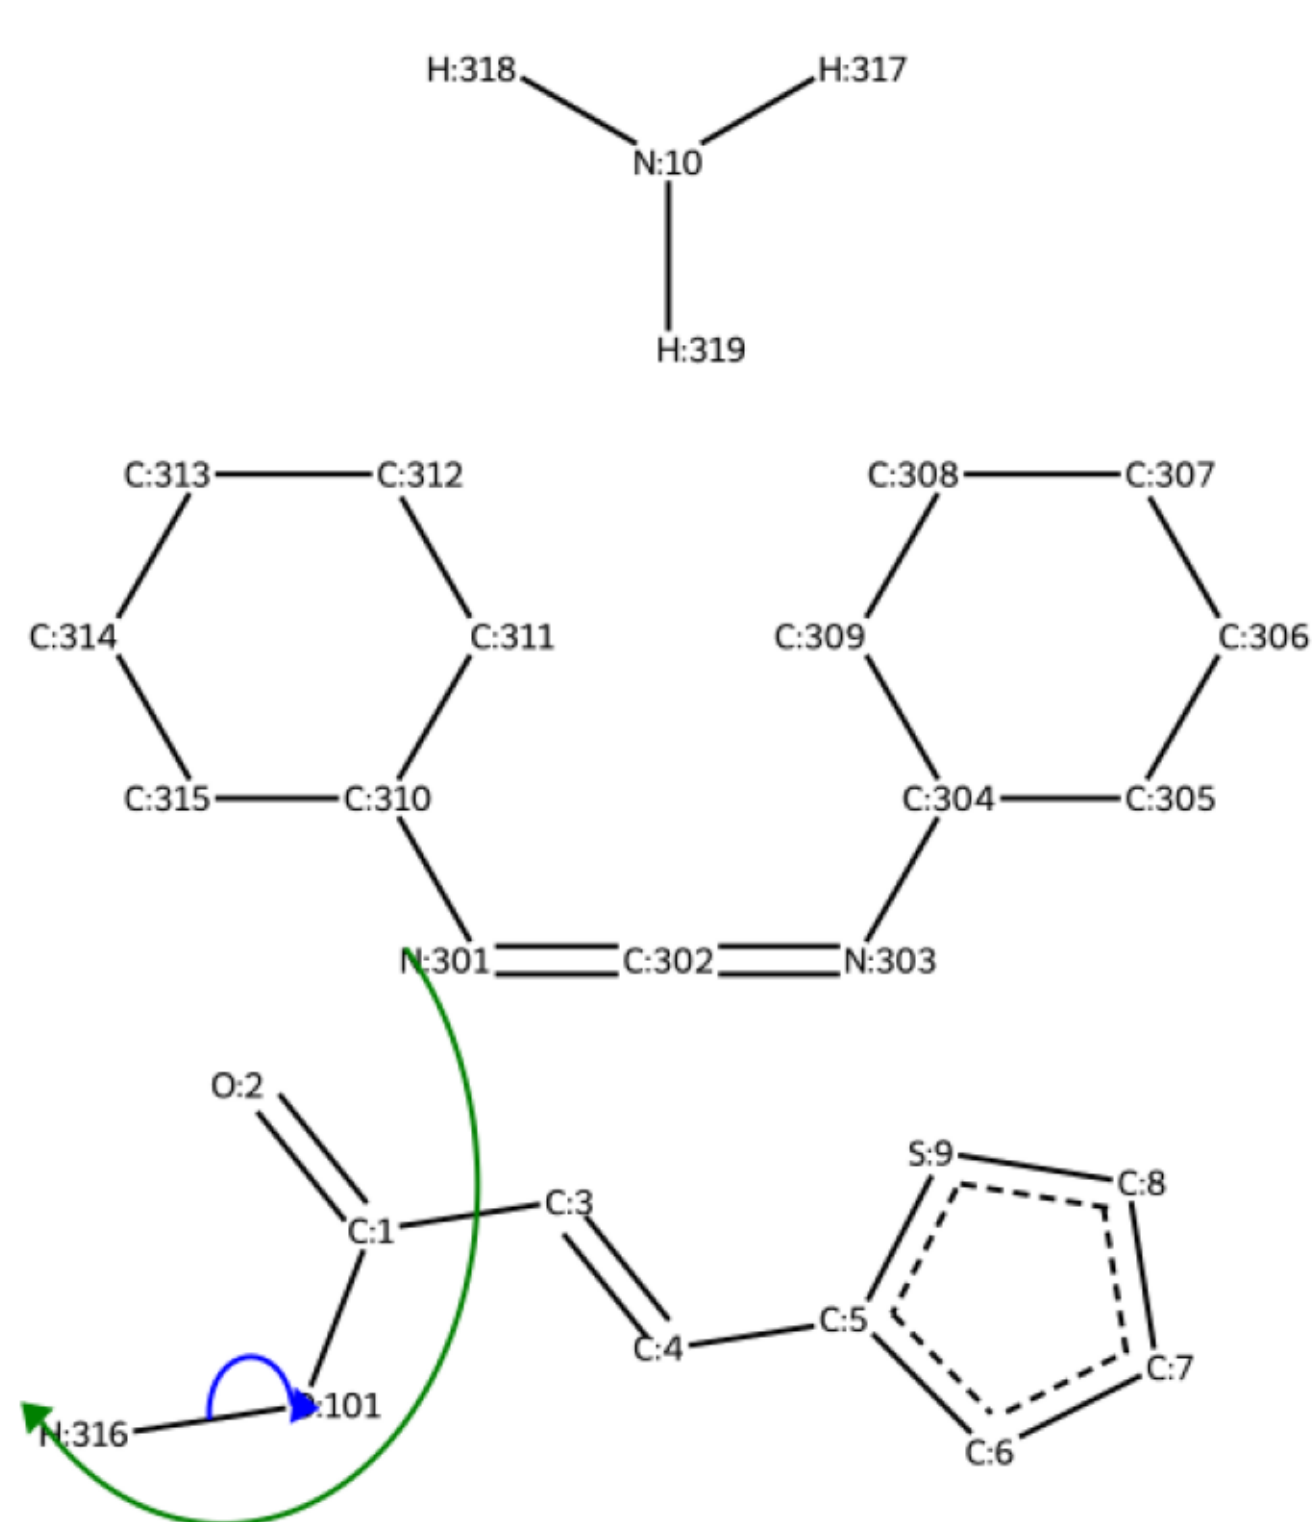

step #2

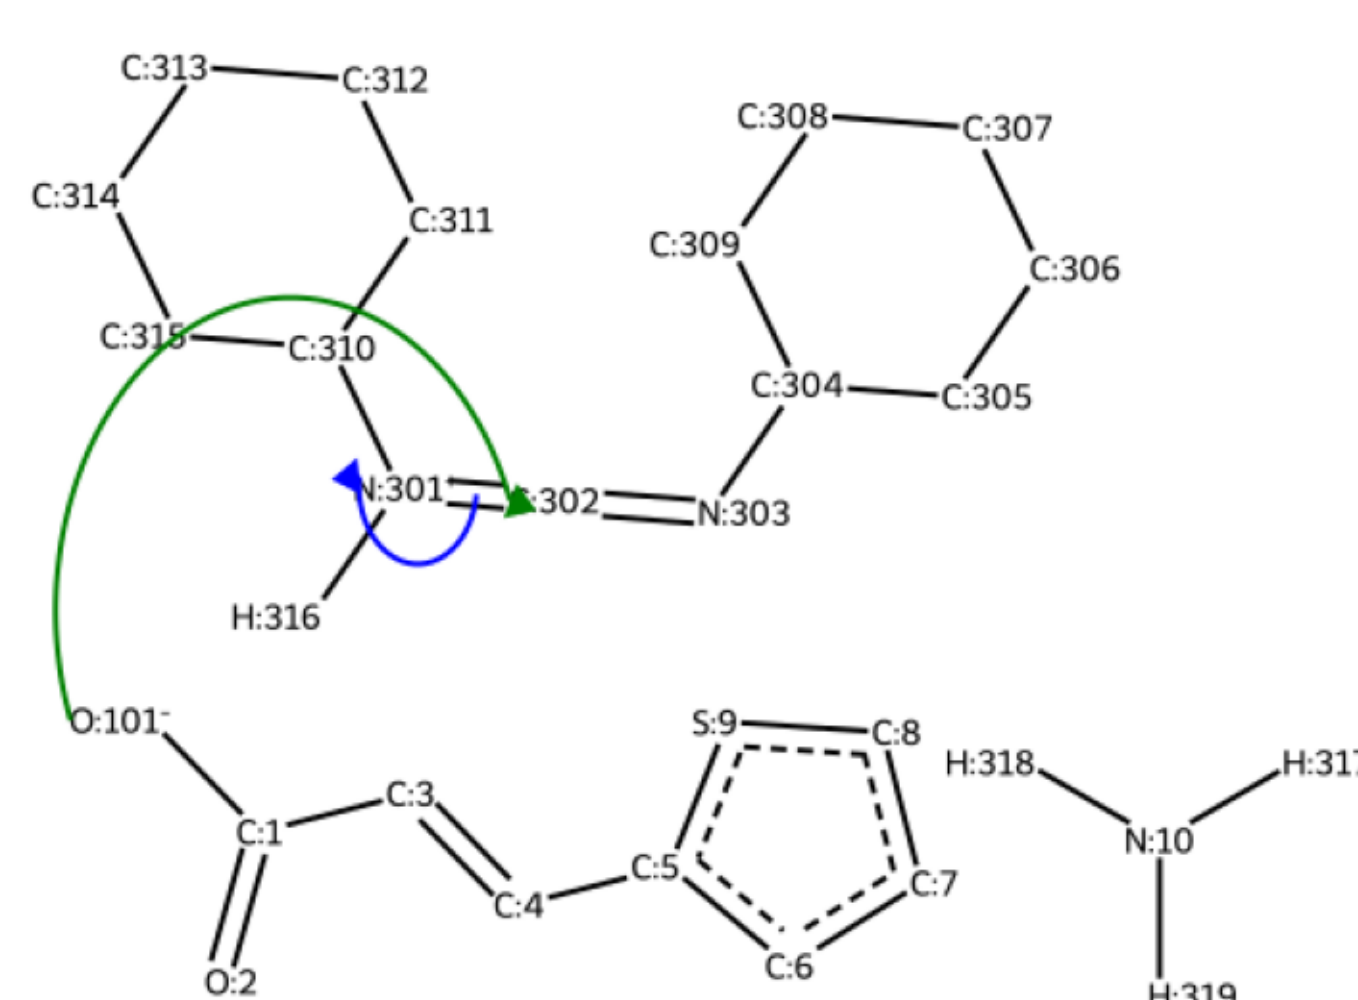

step #3

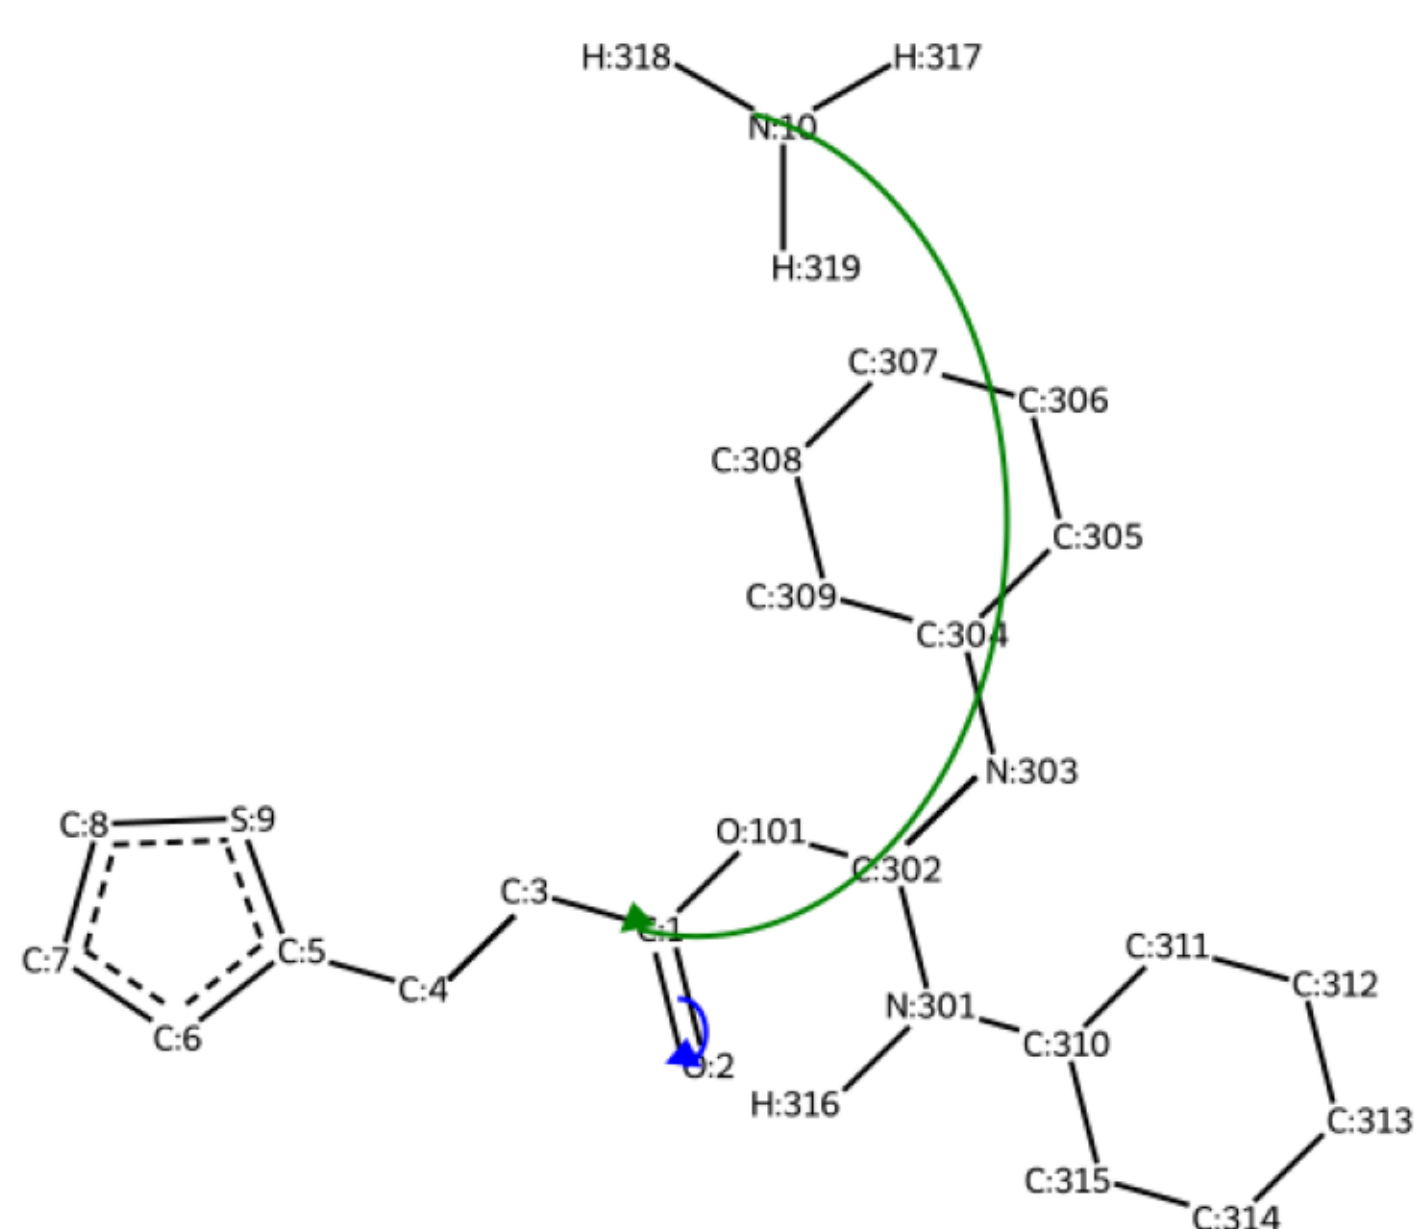

step #4

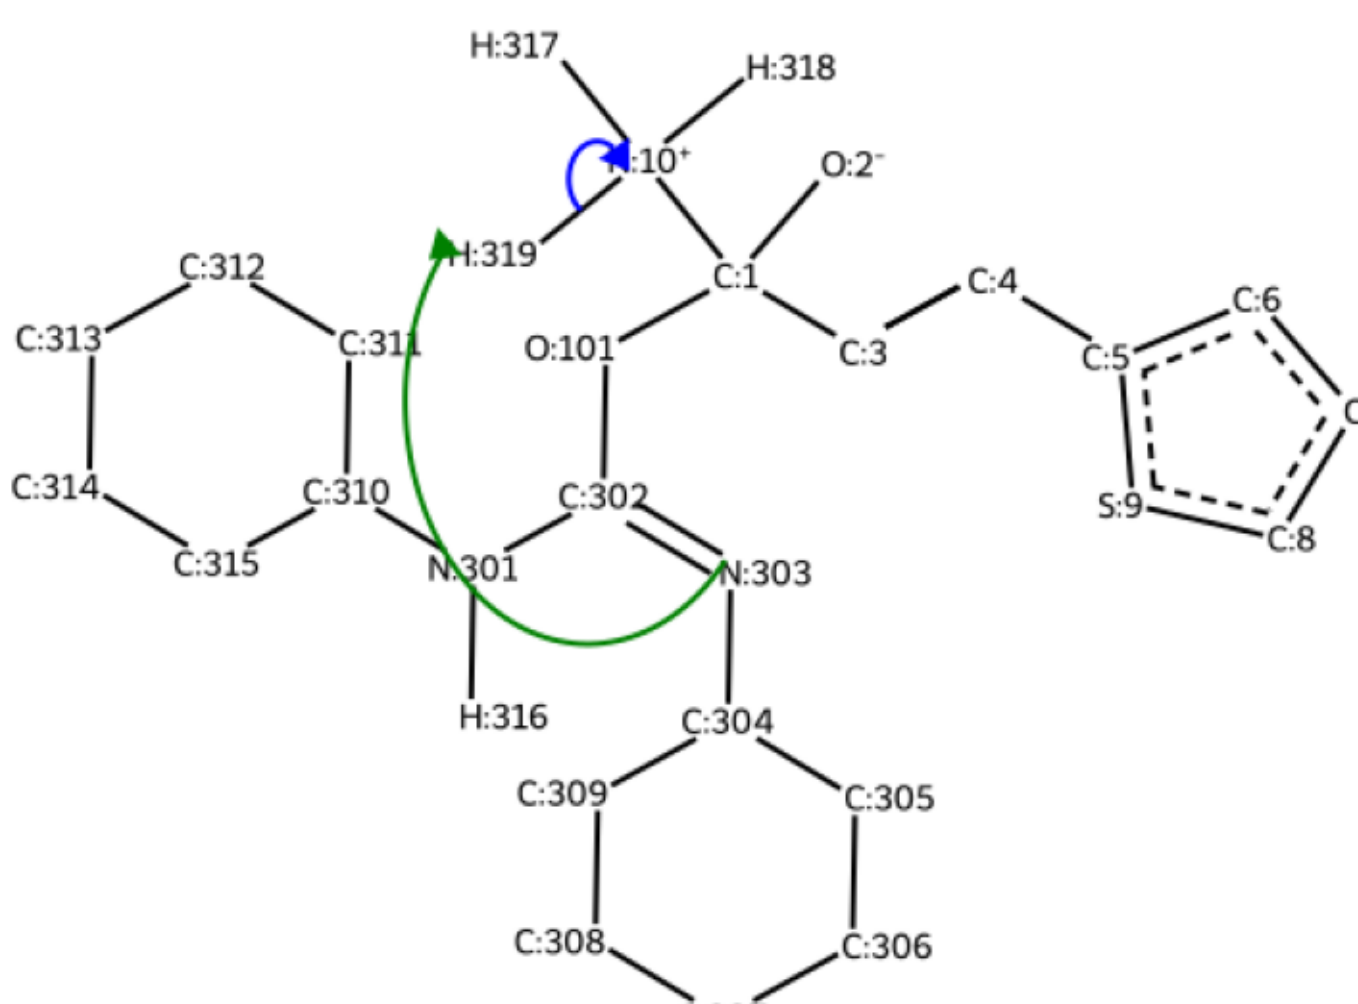

step #5

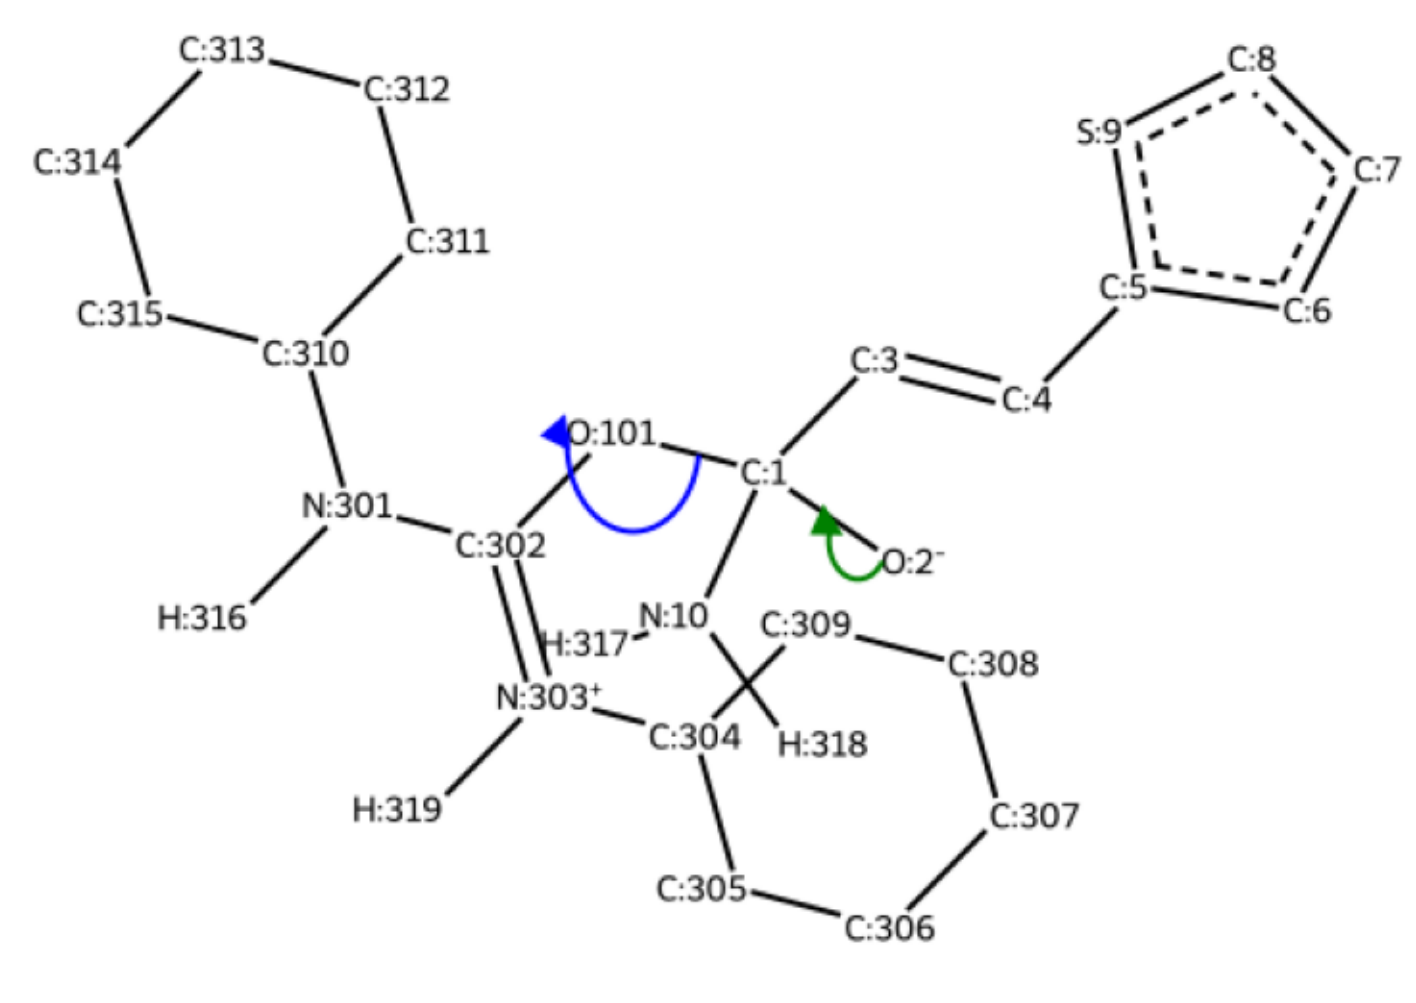

step #6

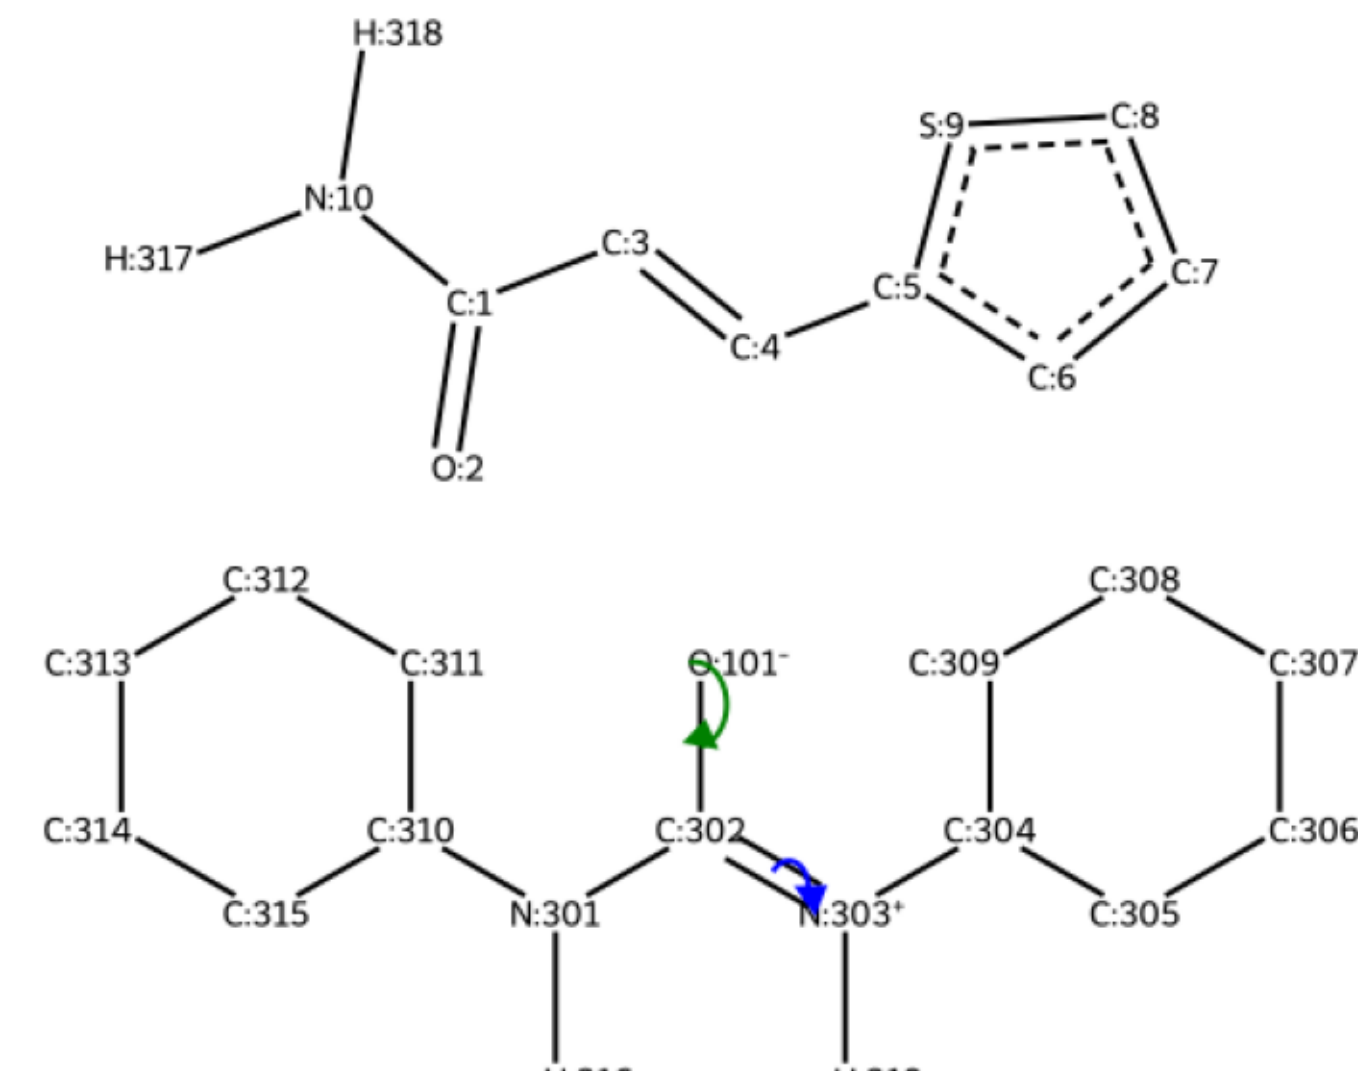

Product(s)

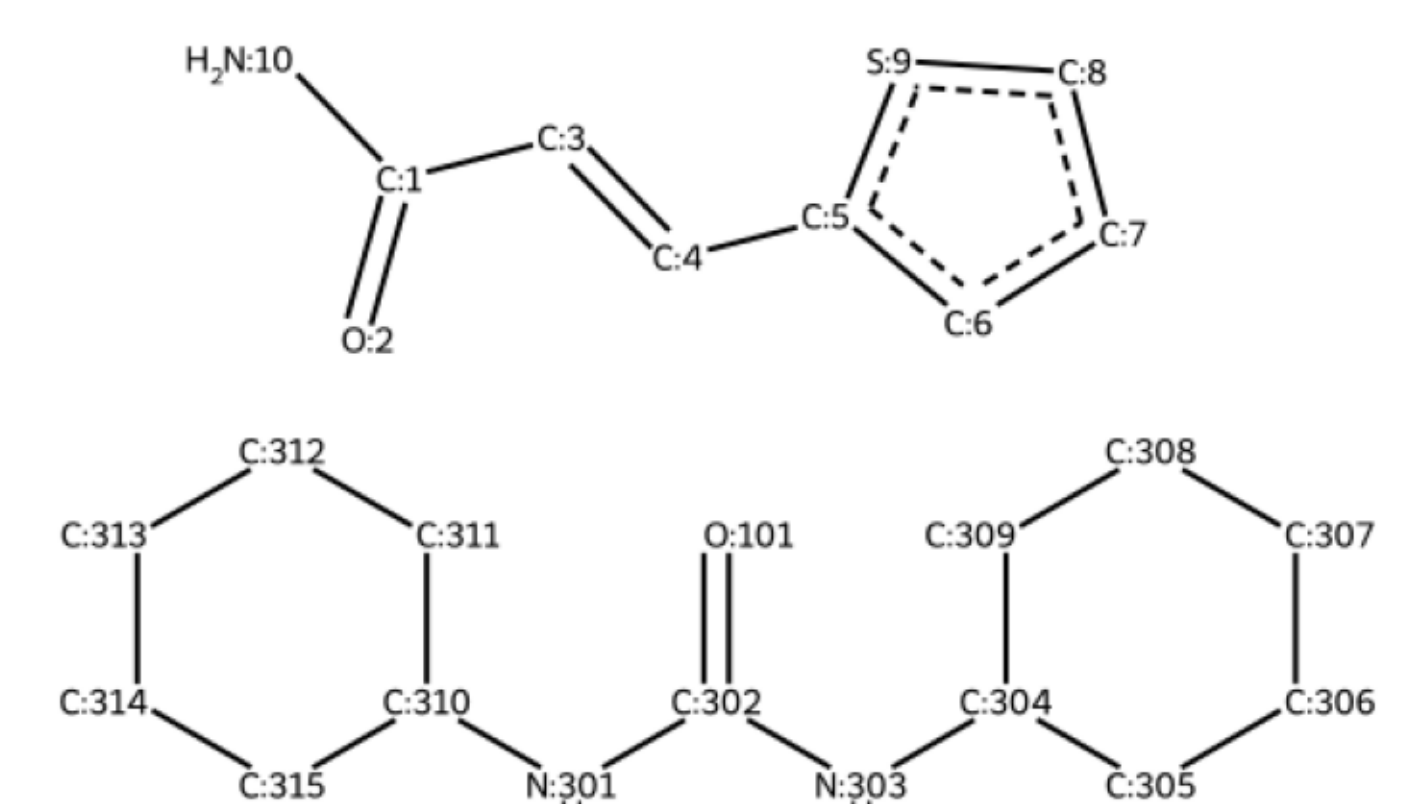



# Original reaction sampled RXN\_ID:96)

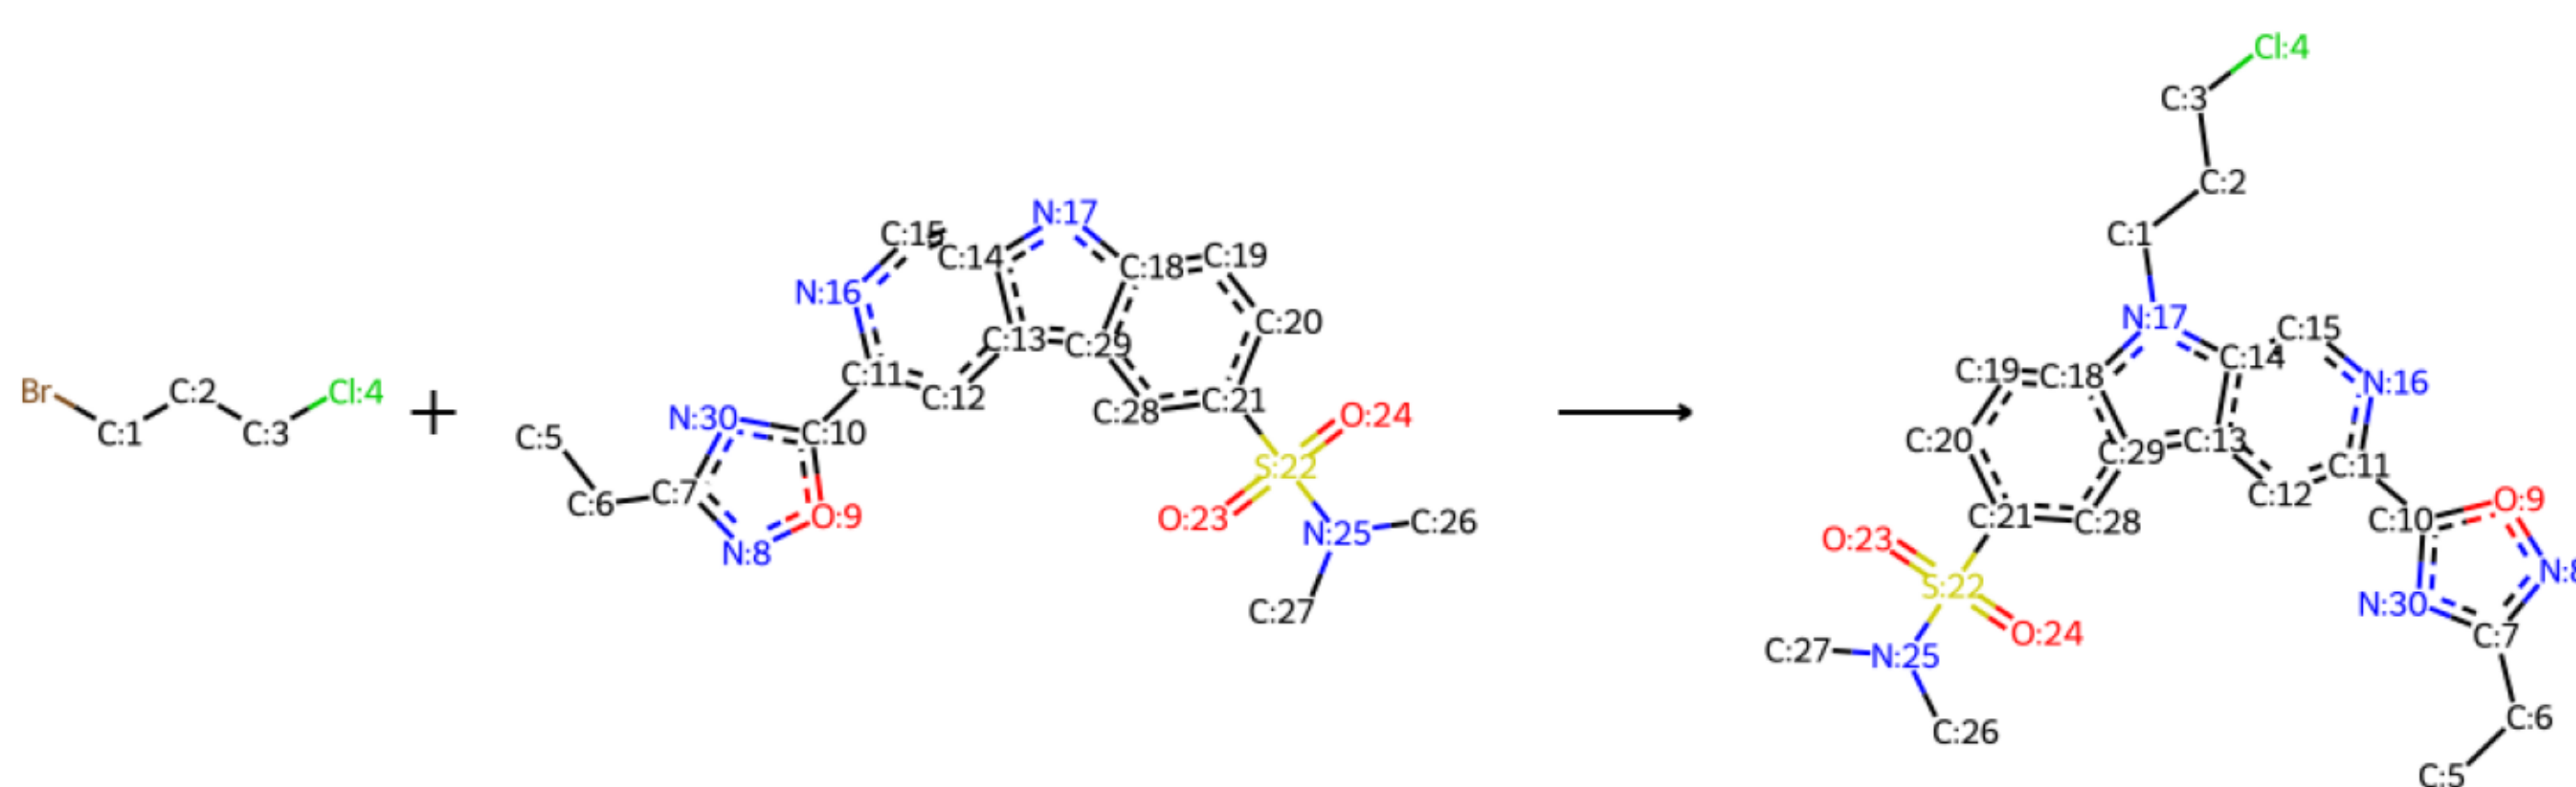

Identified mechanistic class -  
SN2 reaction

## Reaction with missing reagents recovered

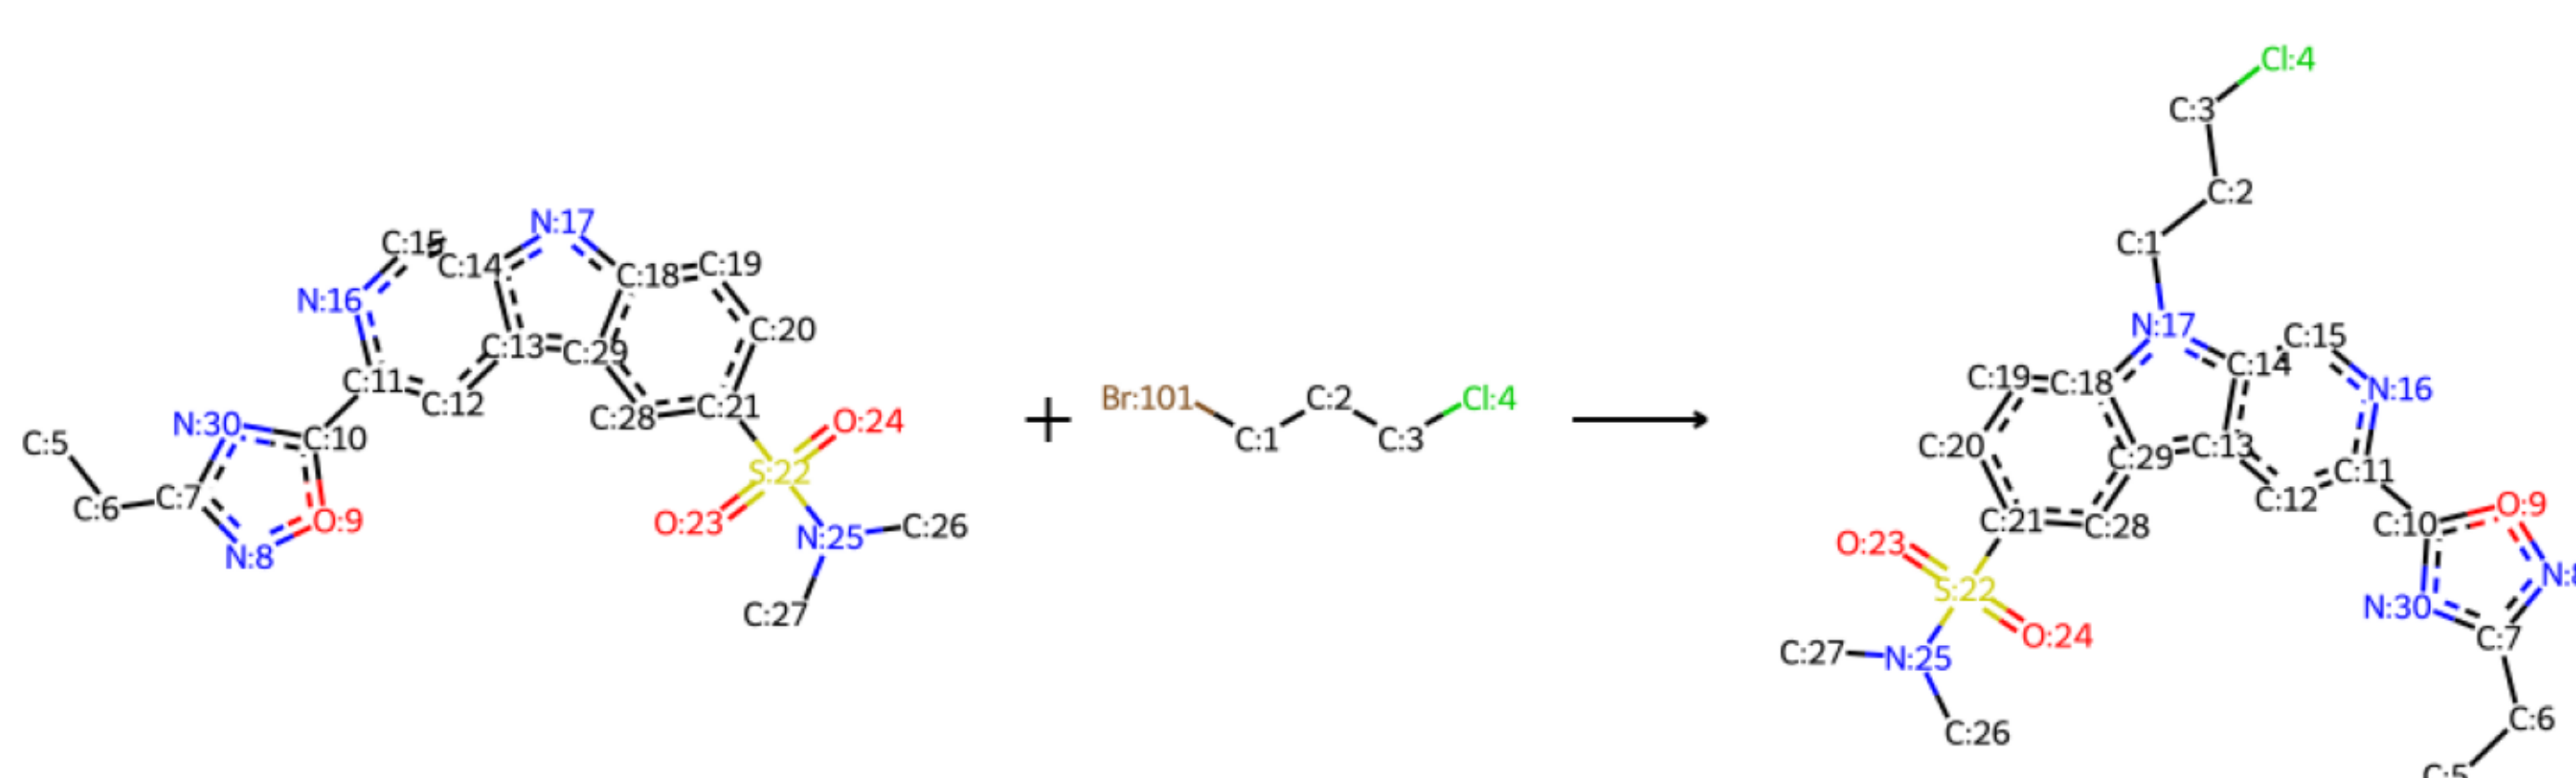

## Proposed mechanistic pathway

[Arrow order: (1) green, (2) blue, (3) red, (4) orange]

step #1

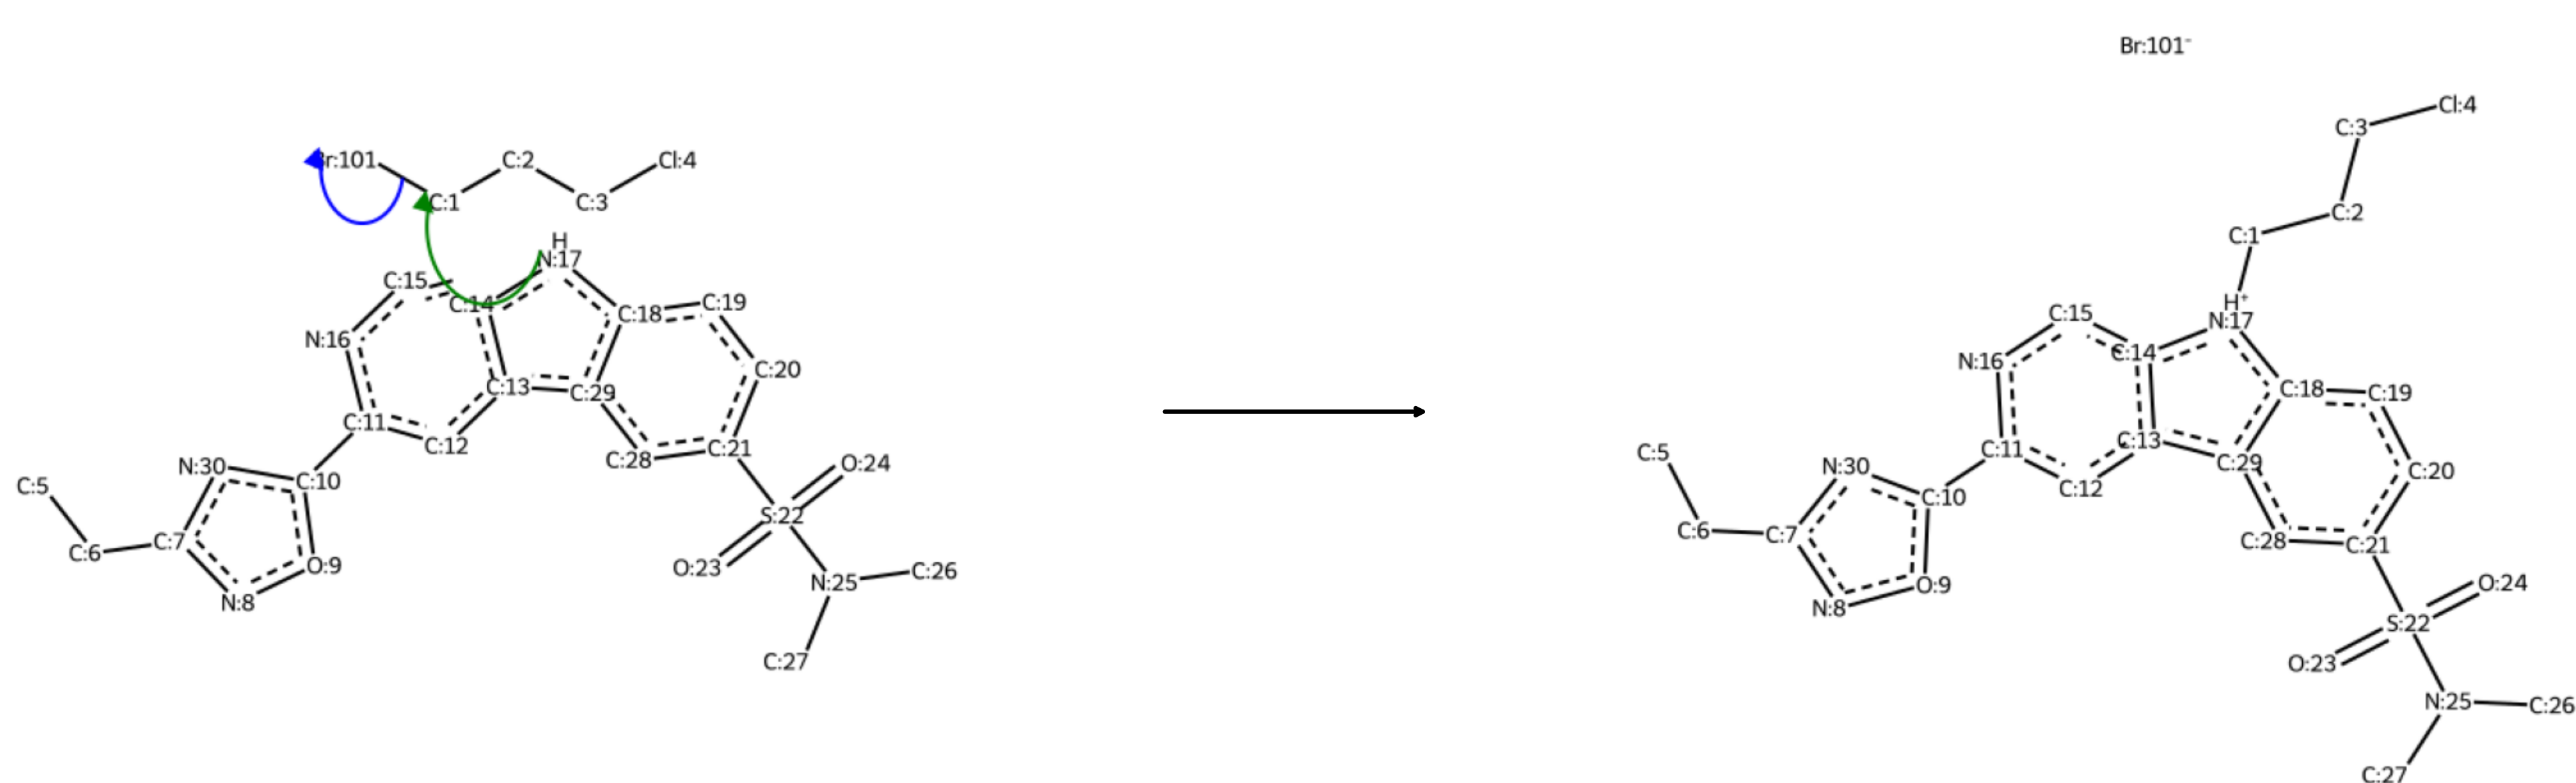

Product(s)

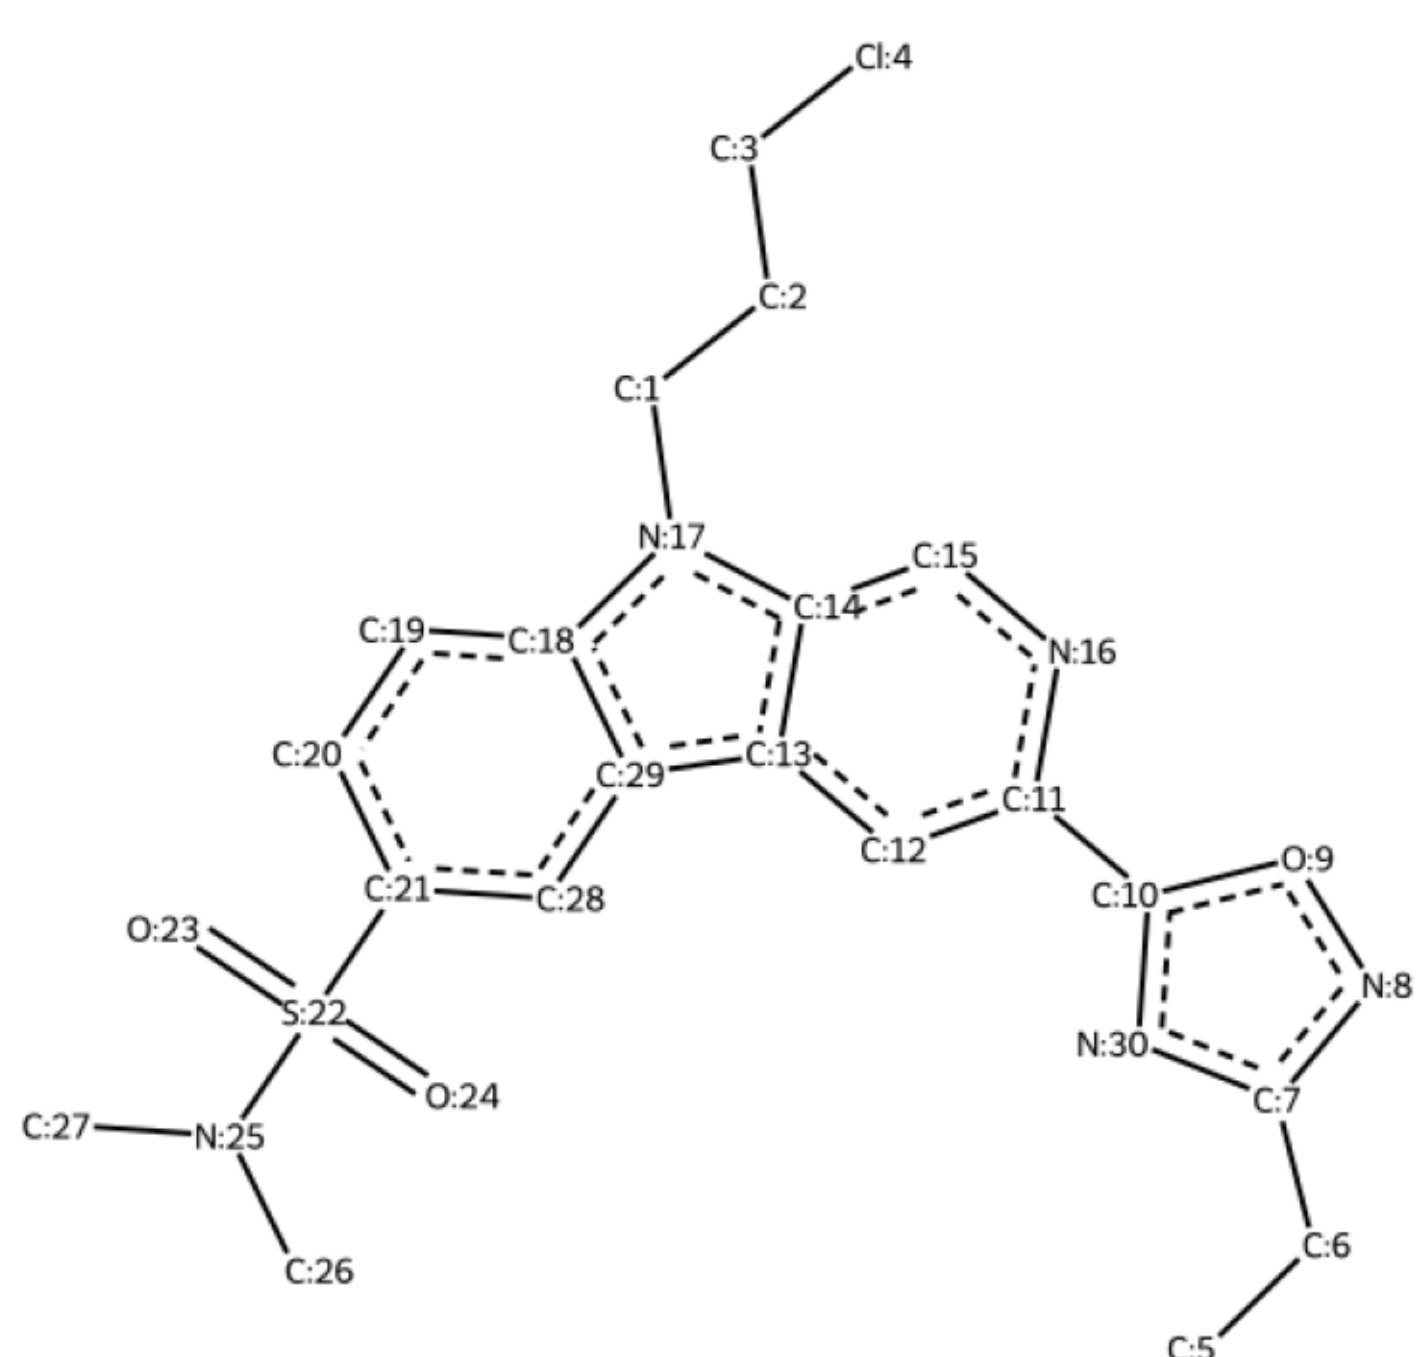

Original reaction  
sampled RXN\_ID:97)

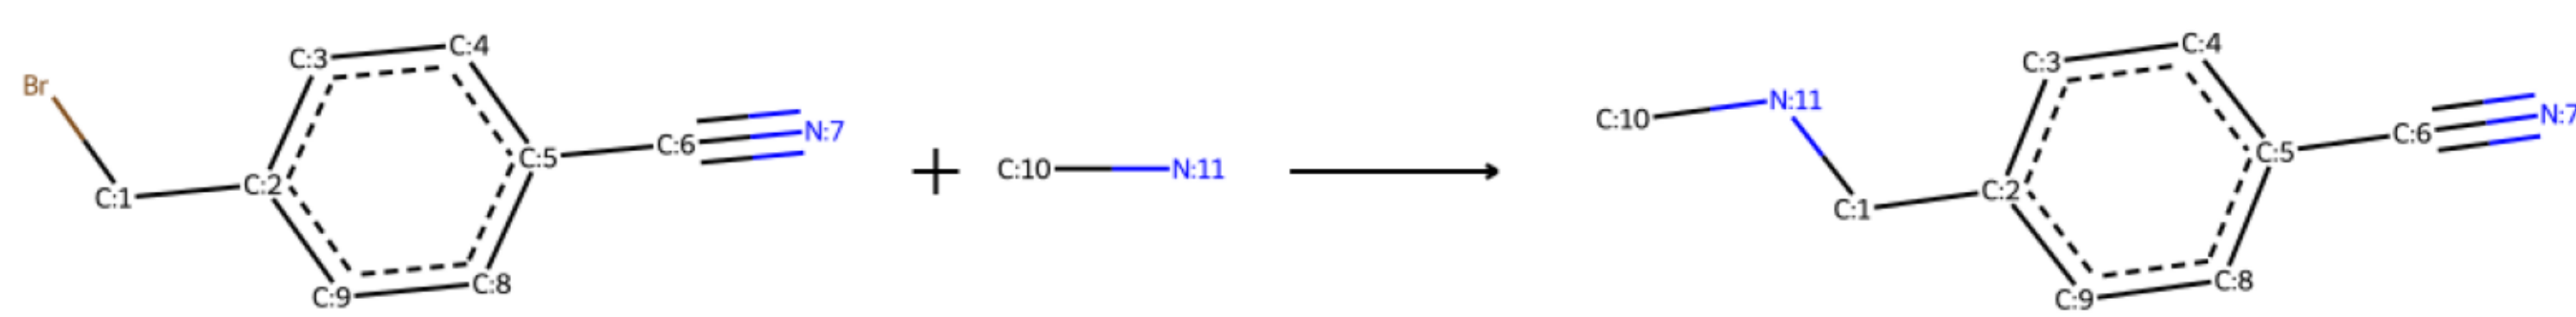

Identified mechanistic class -  
SN2 reaction

Reaction with missing reagents recovered

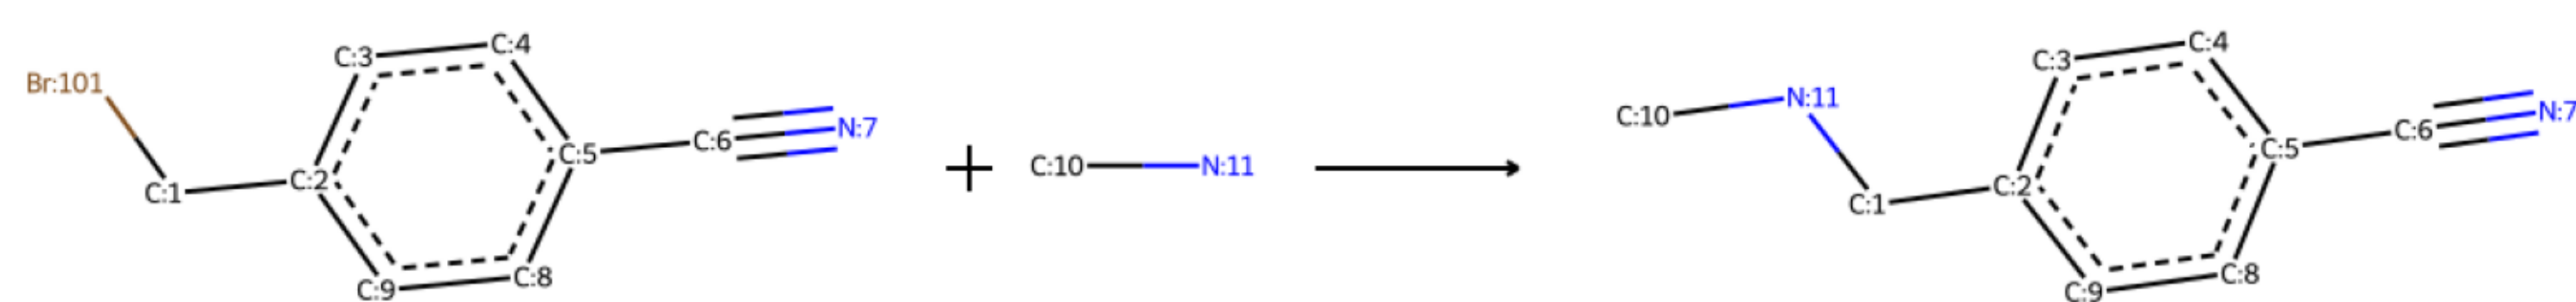

Proposed mechanistic pathway

[Arrow order: (1) green, (2) blue, (3) red, (4) orange]

step #1

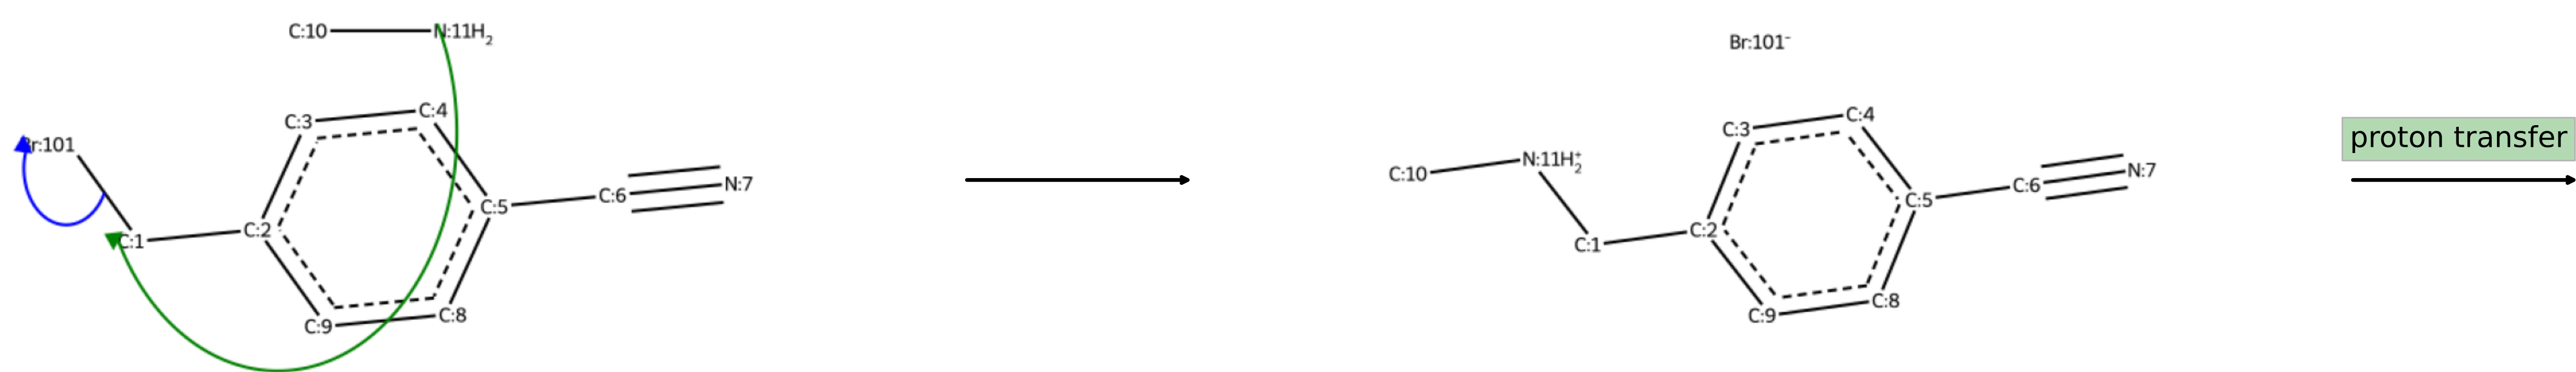

Product(s)

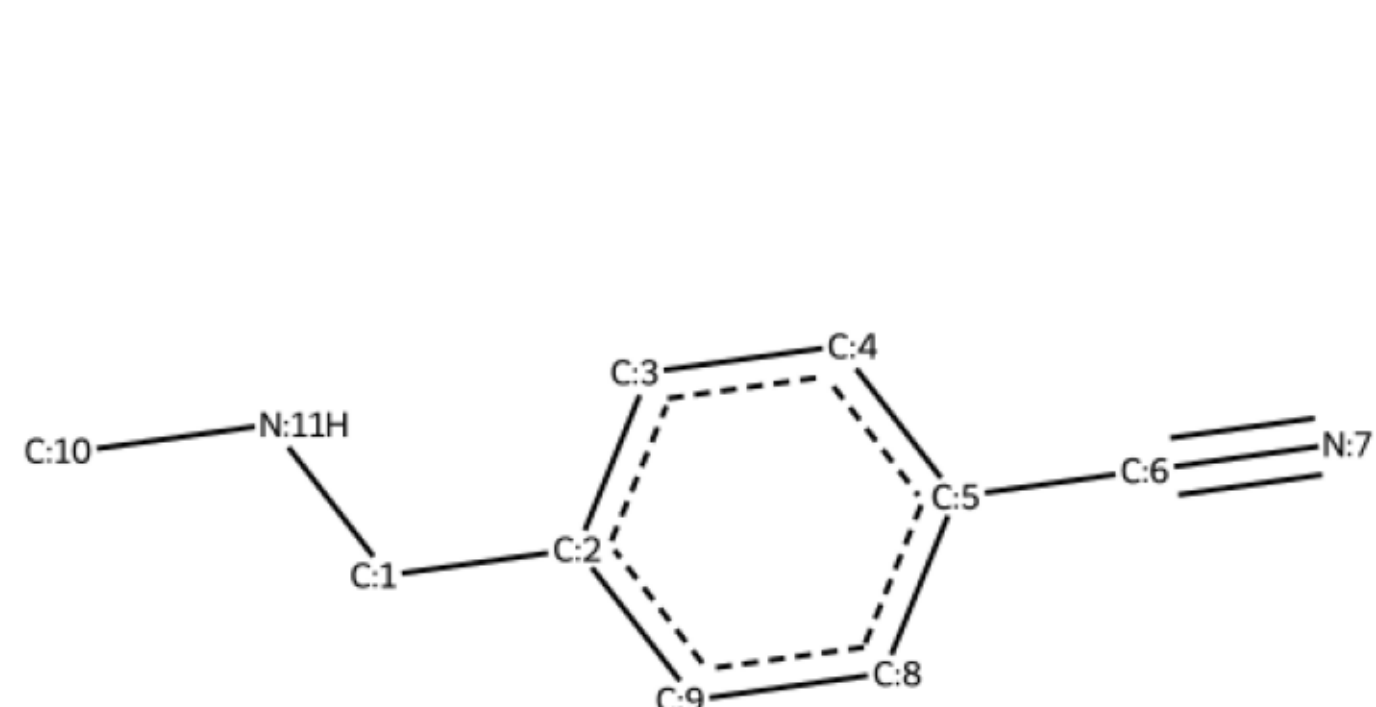



Original reaction  
sampled RXN\_ID:98)

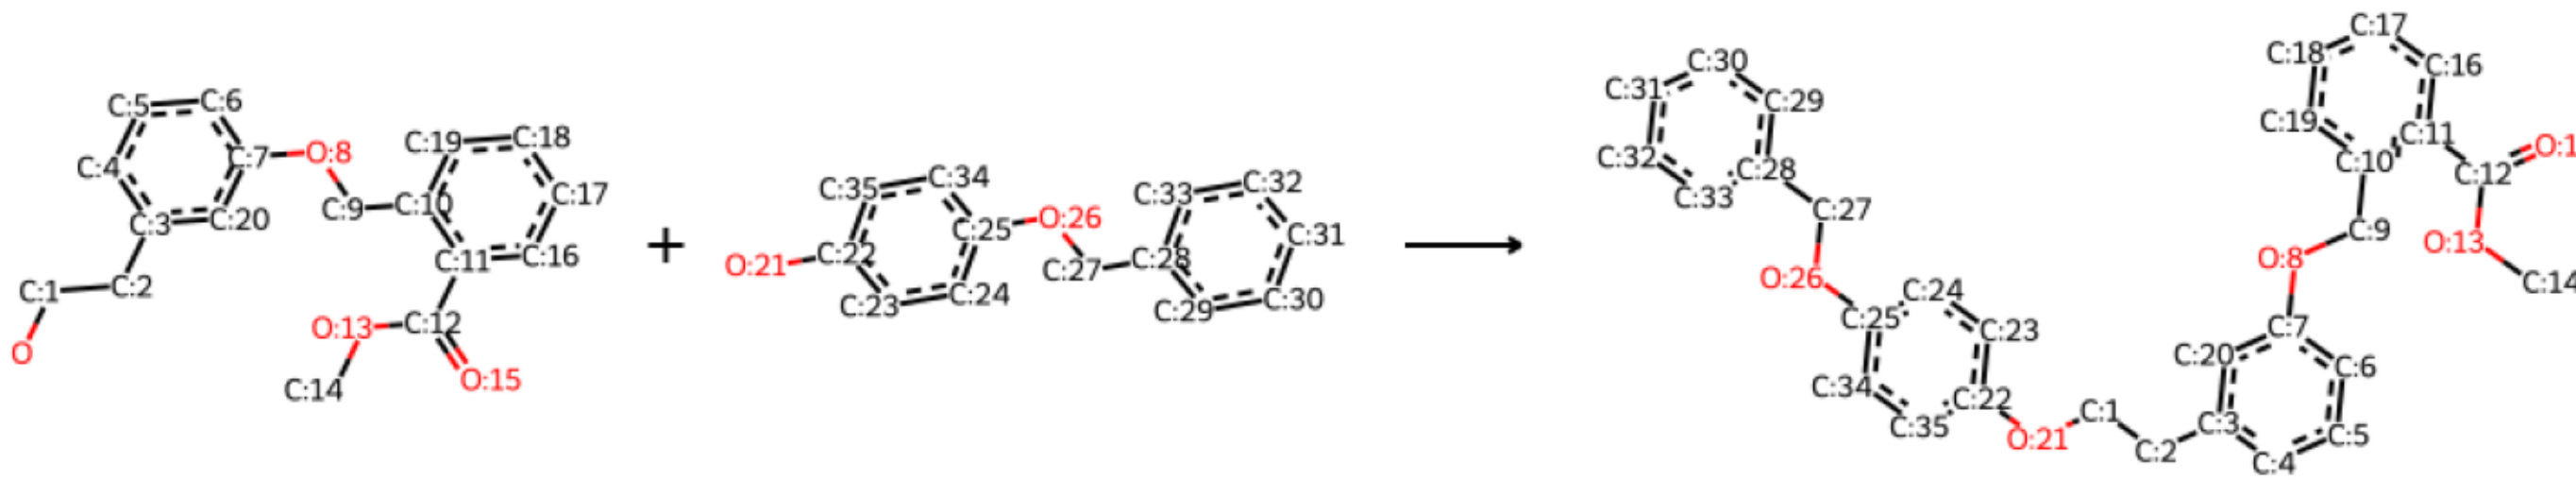

Identified mechanistic class -  
Mitsunobu reaction

Reaction with missing reagents recovered

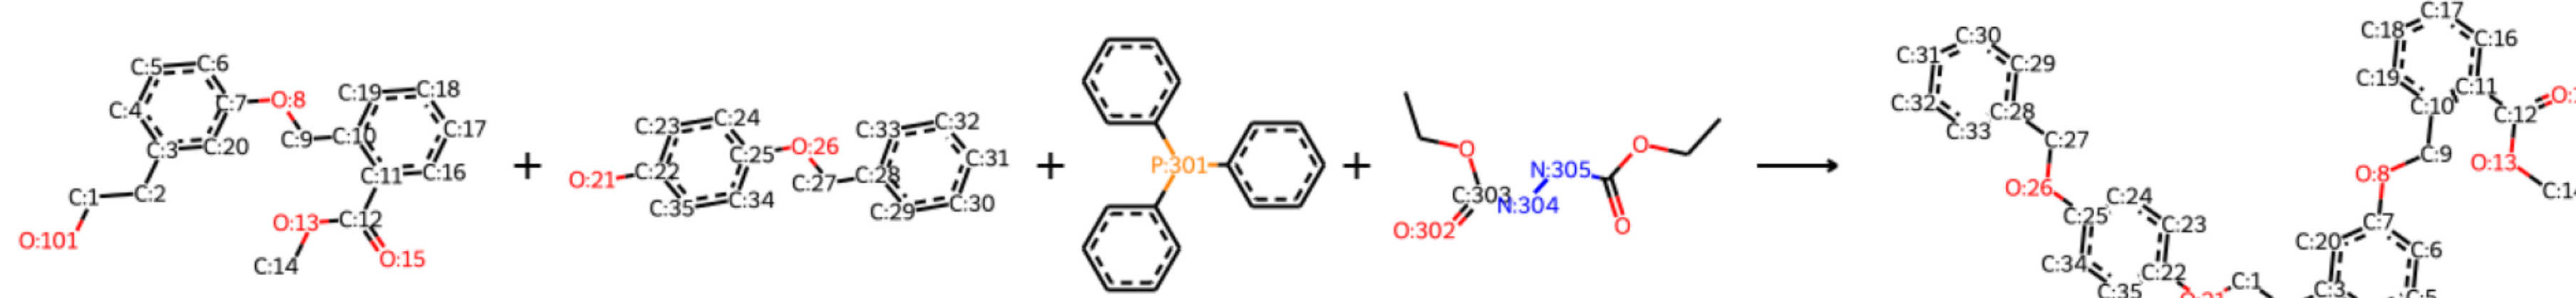

Proposed mechanistic pathway

[Arrow order: (1) green, (2) blue, (3) red, (4) orange]

step #1

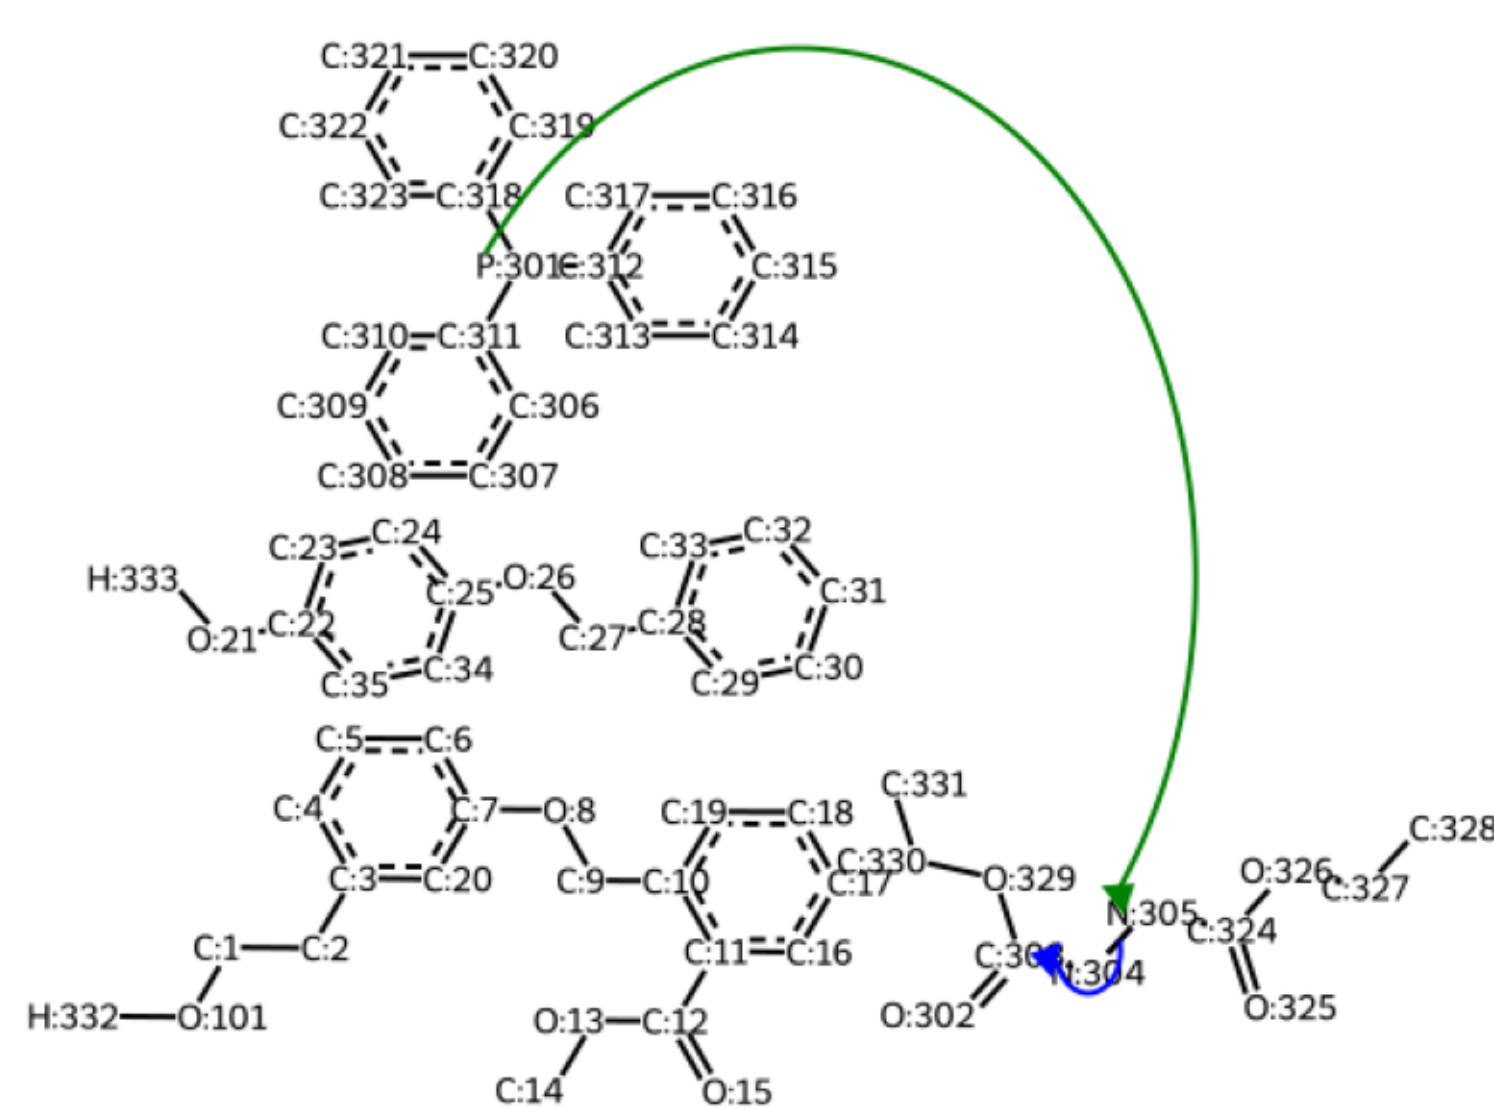

step #2

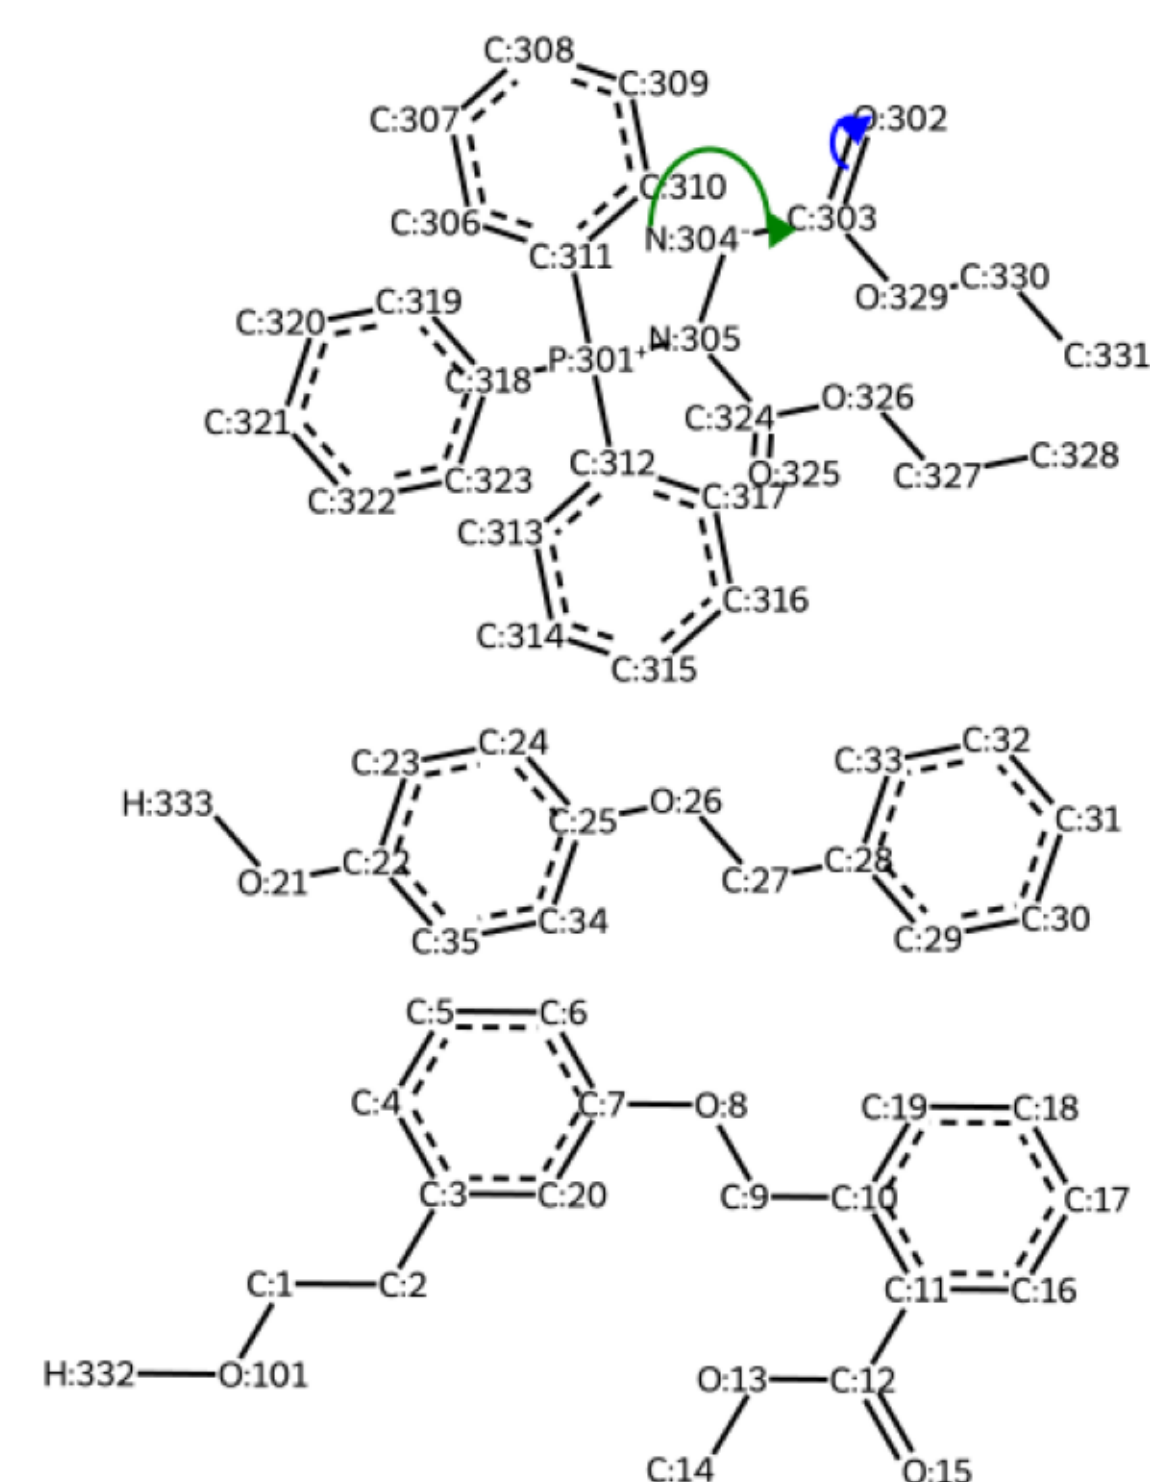

step #3

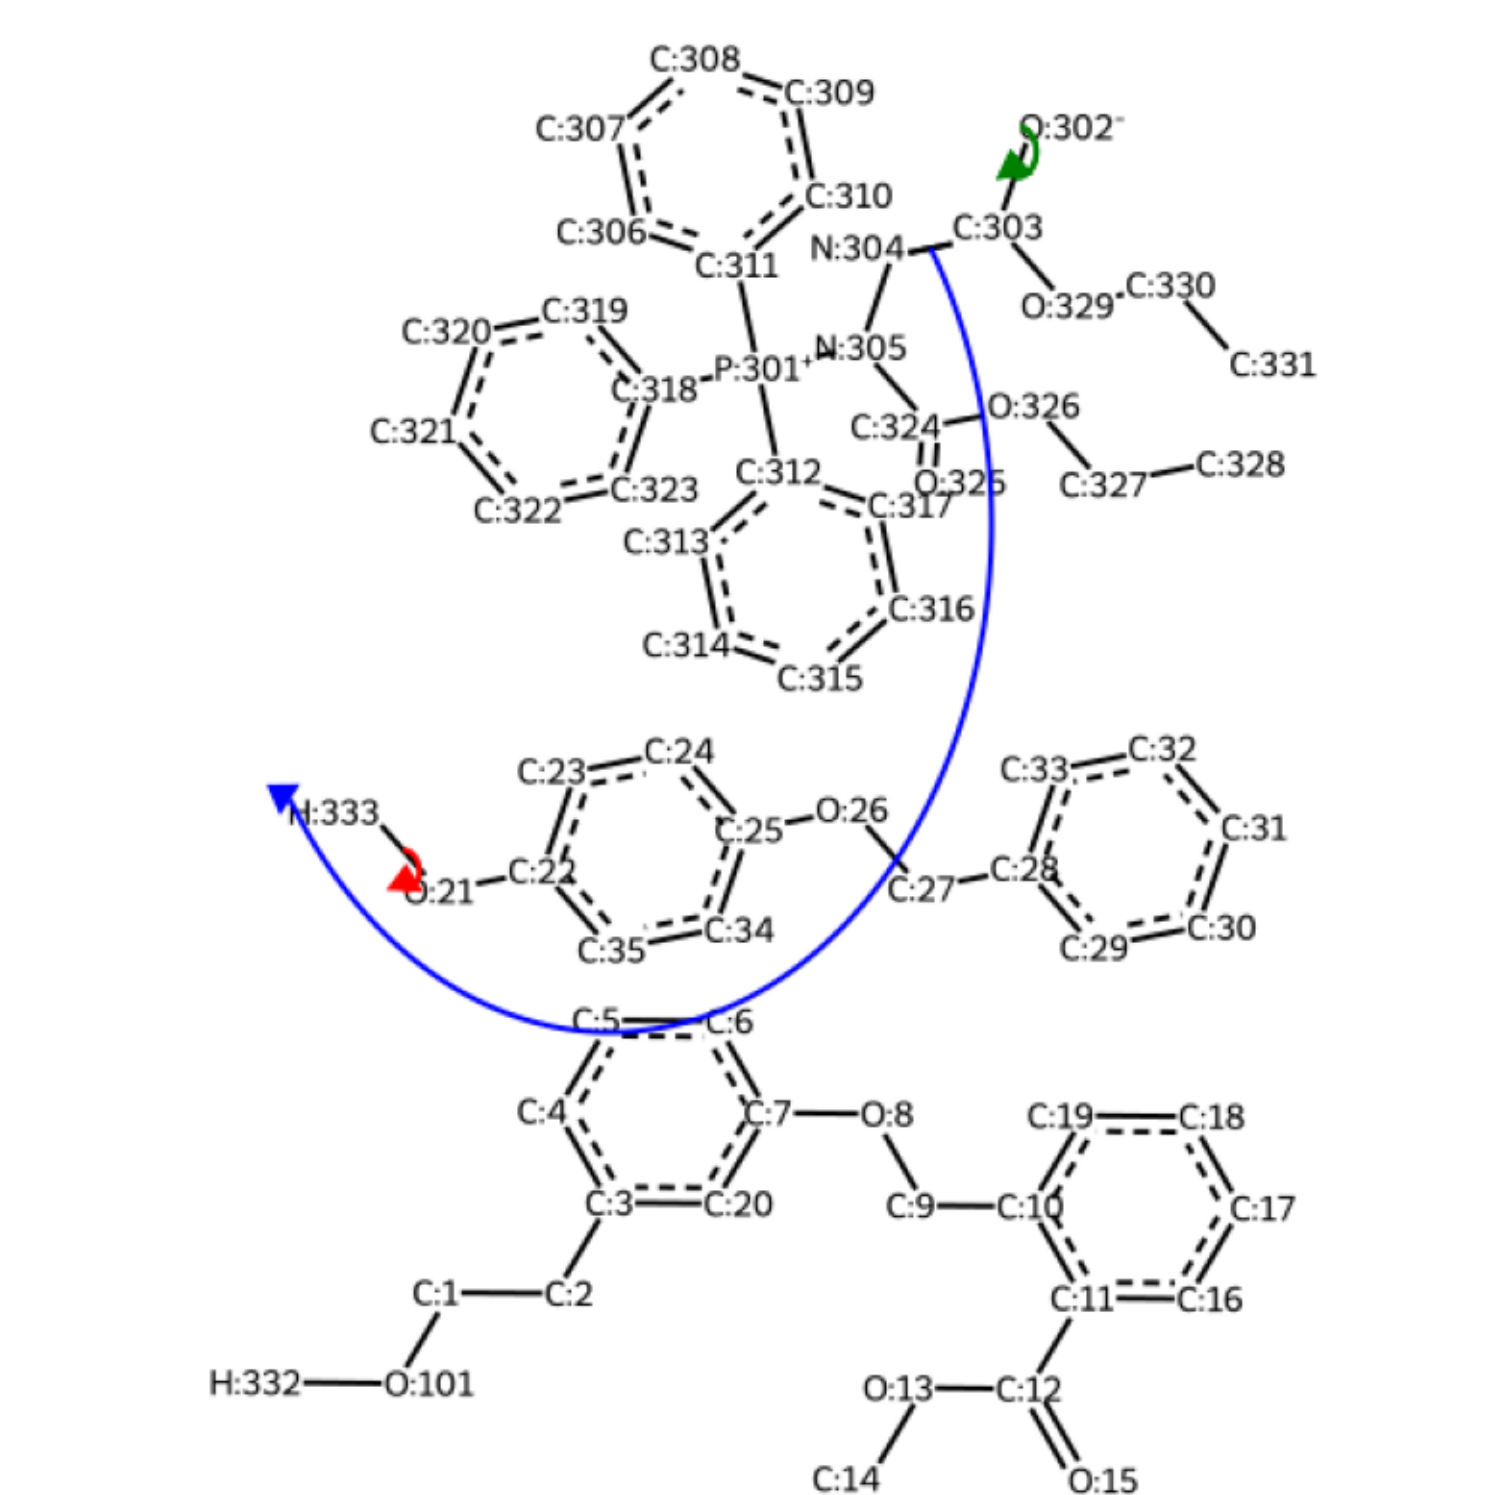

step #4

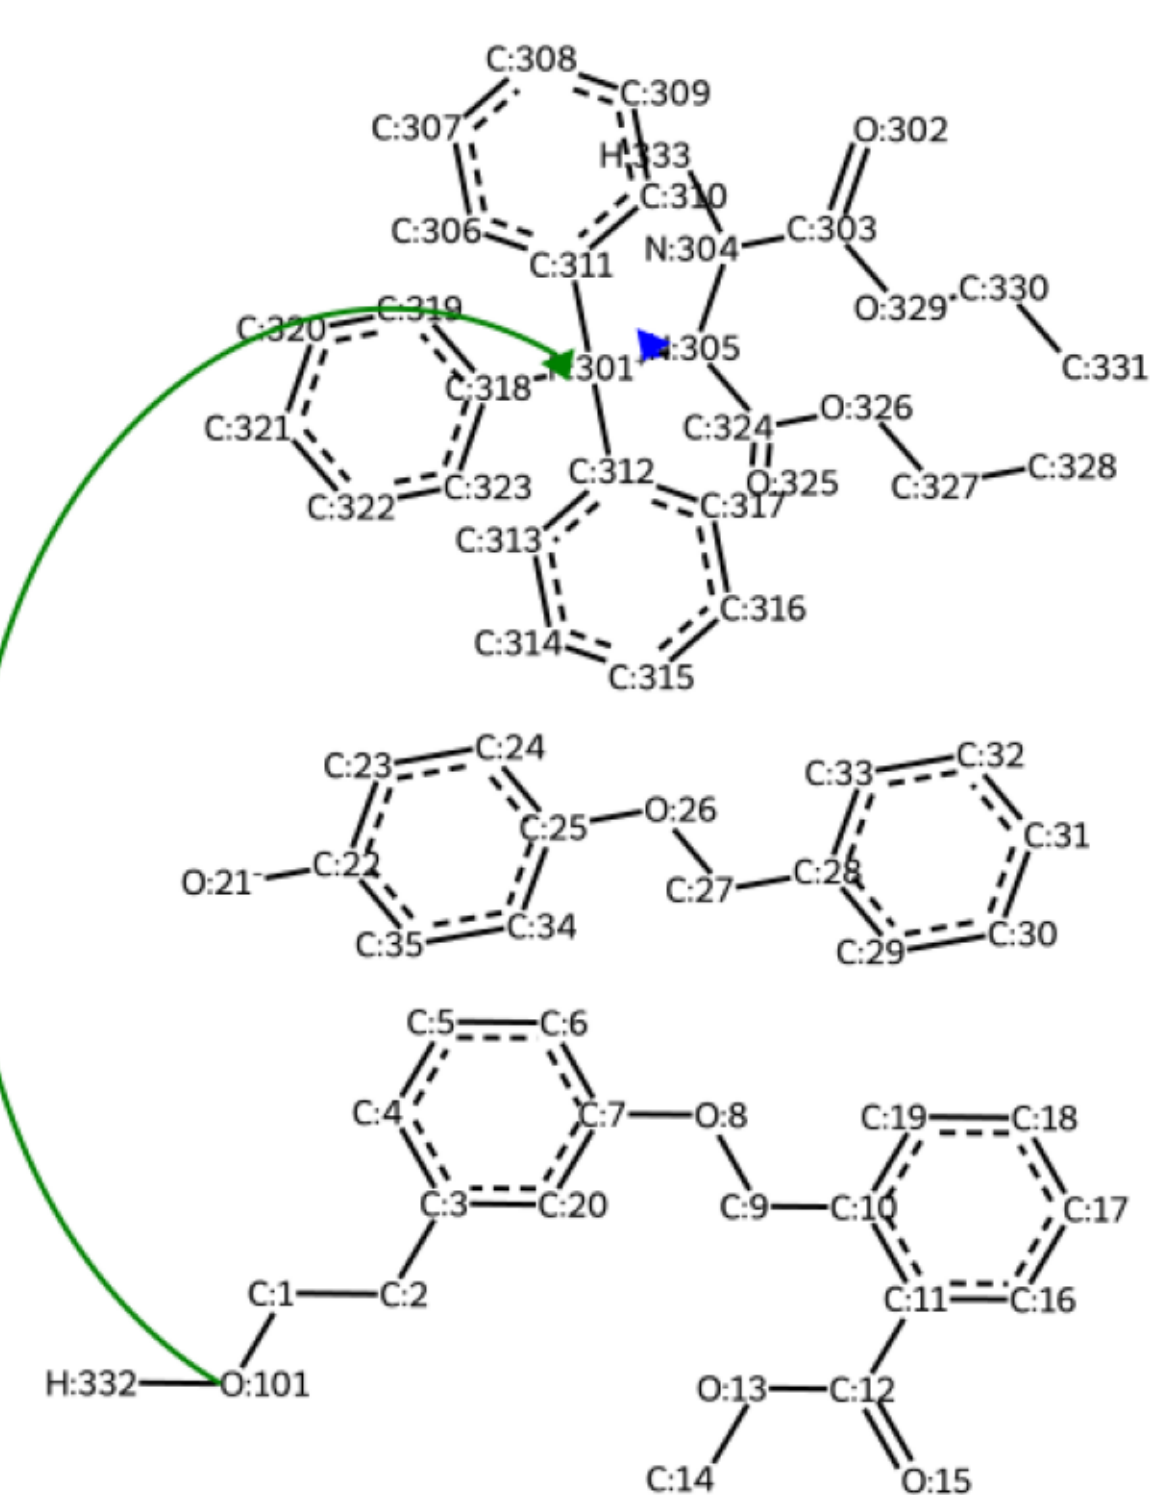

step #5

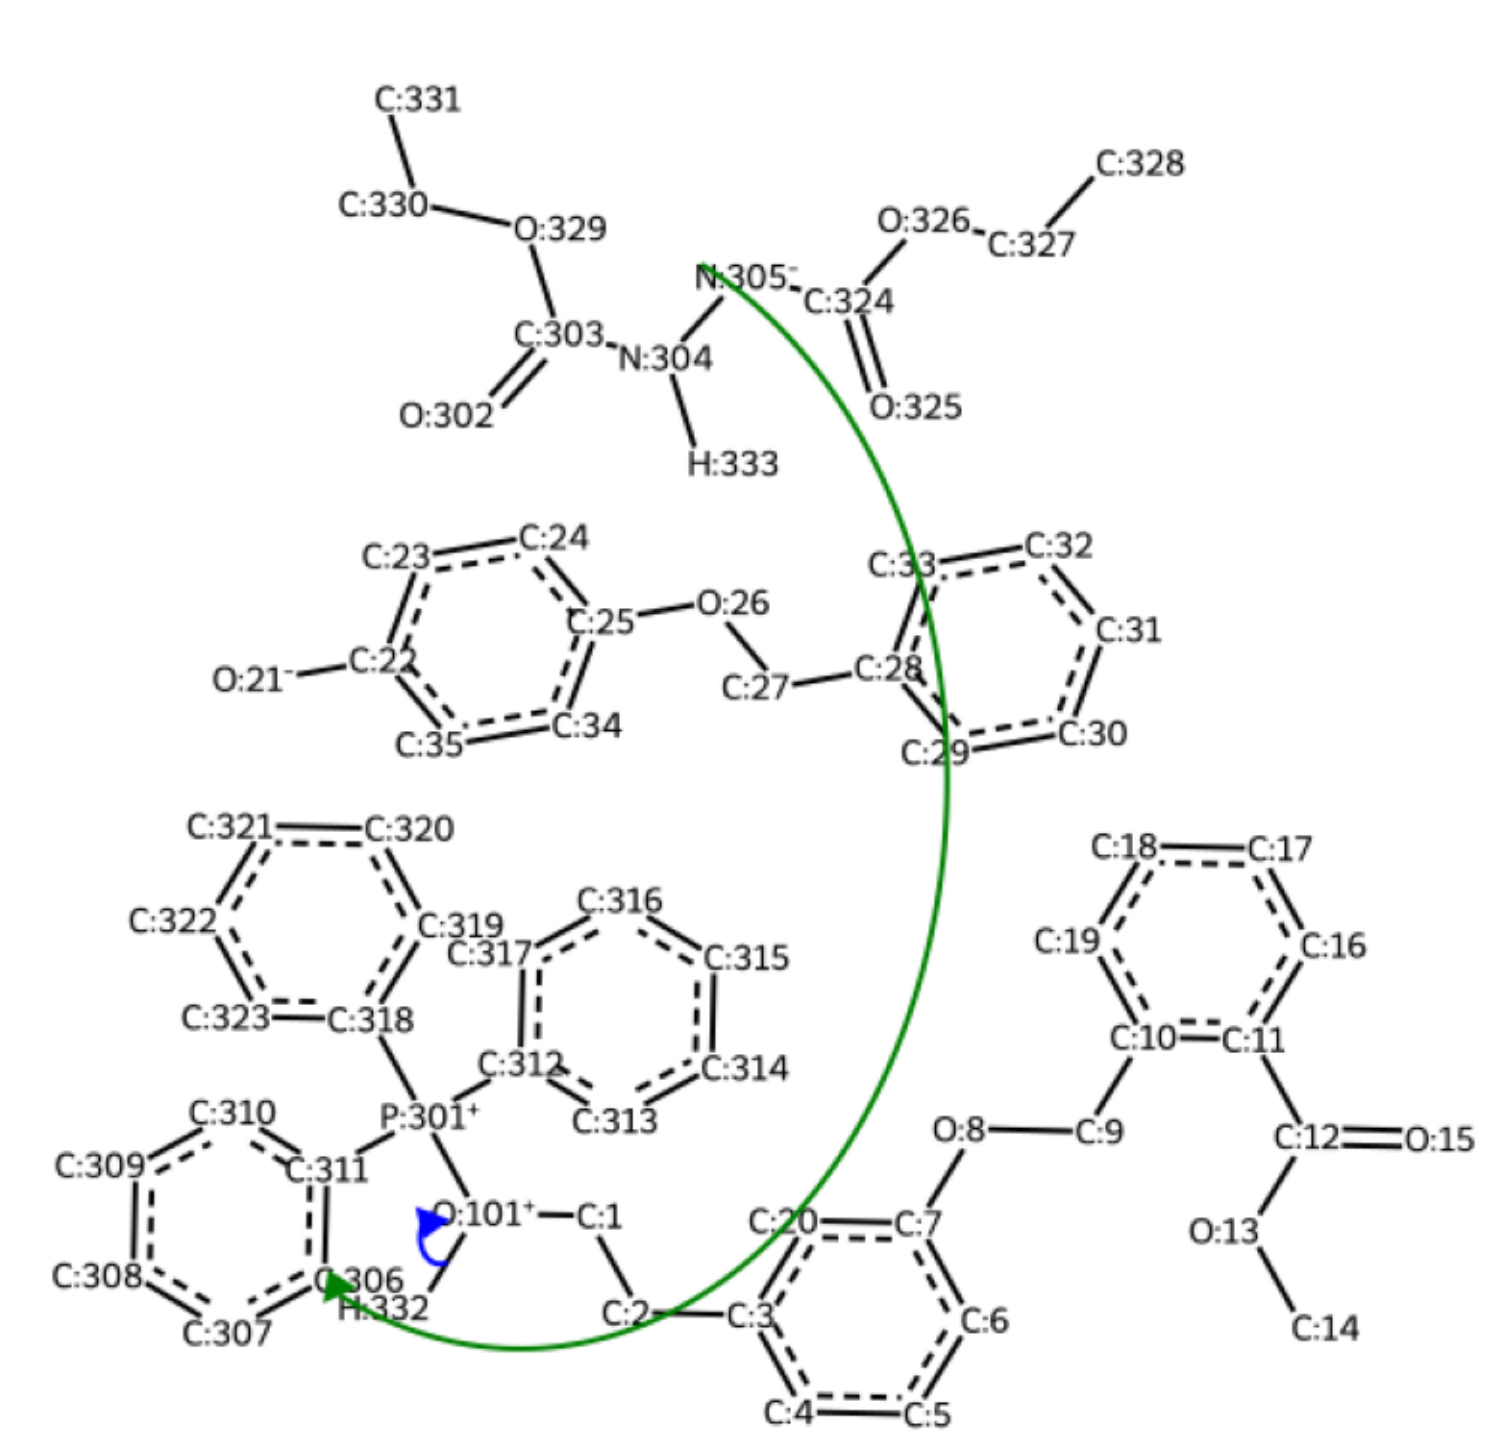

step #6

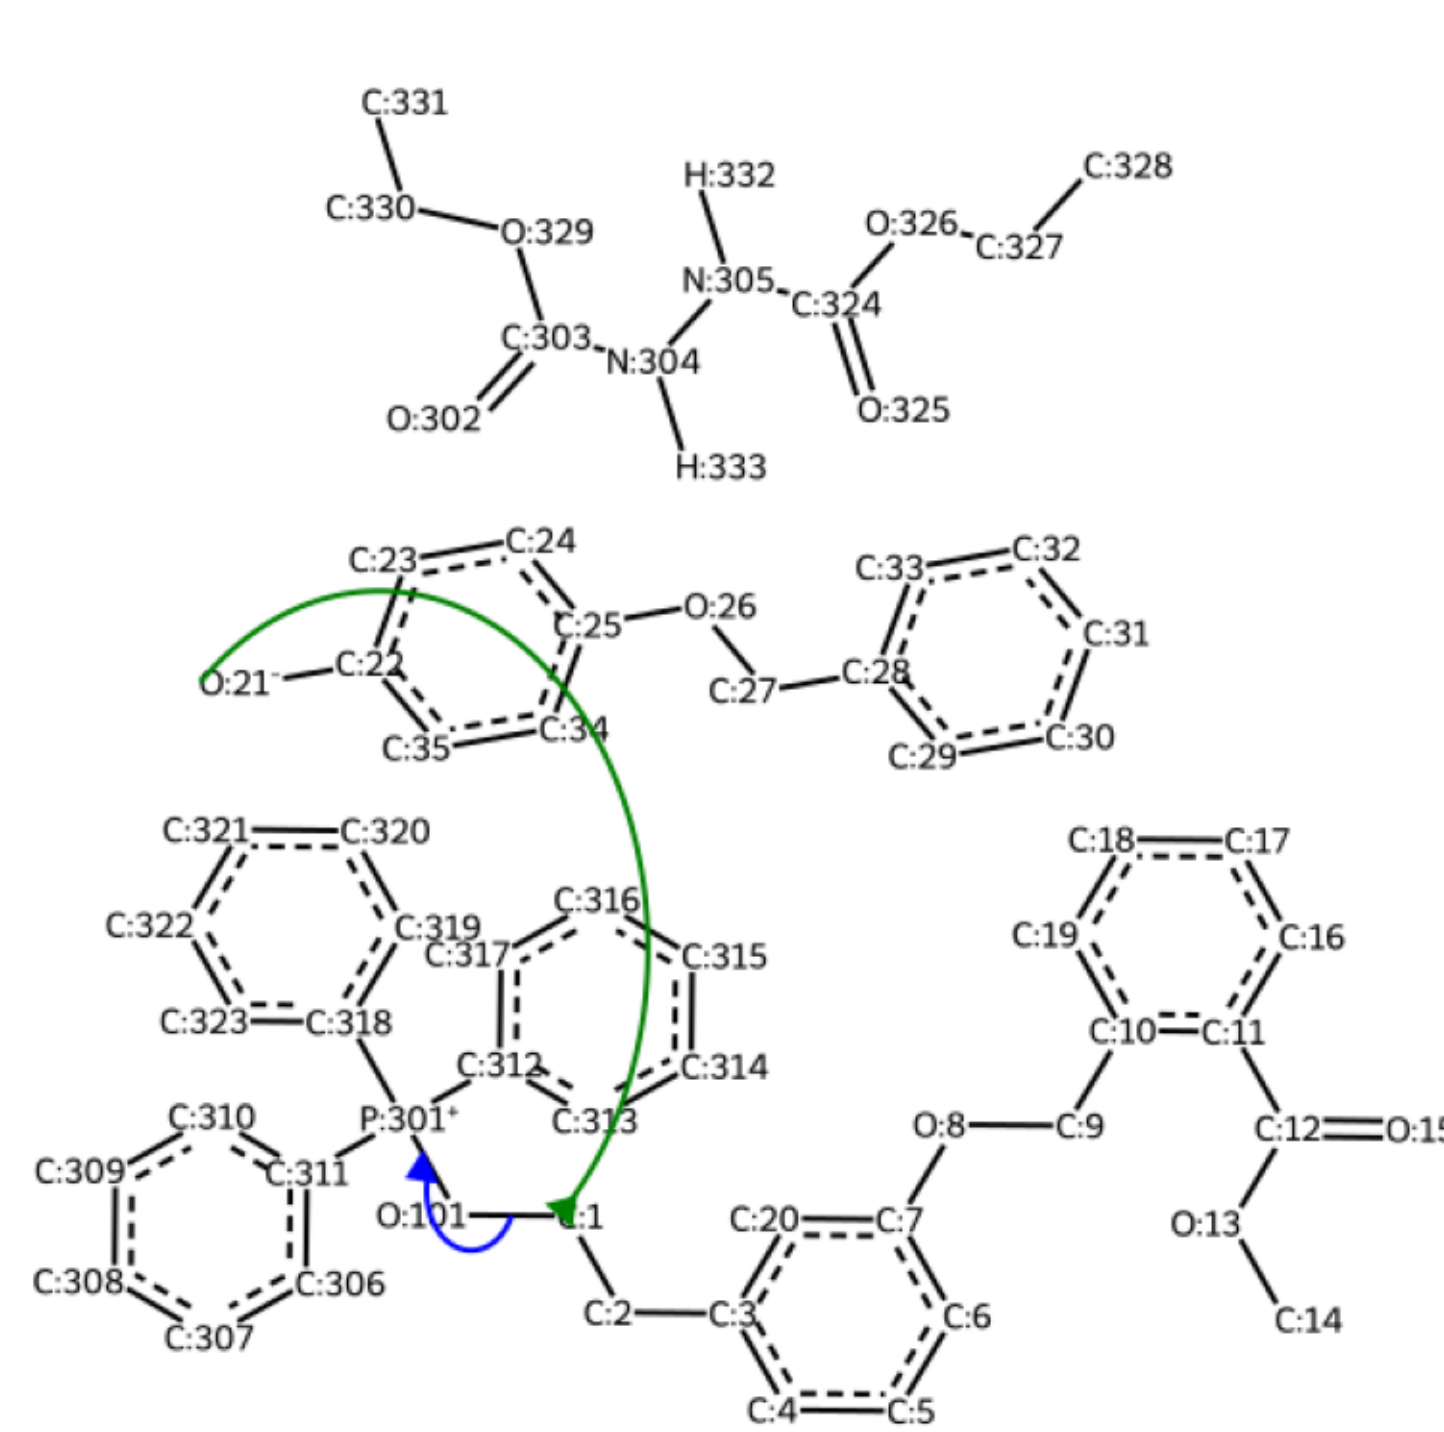

Product(s)

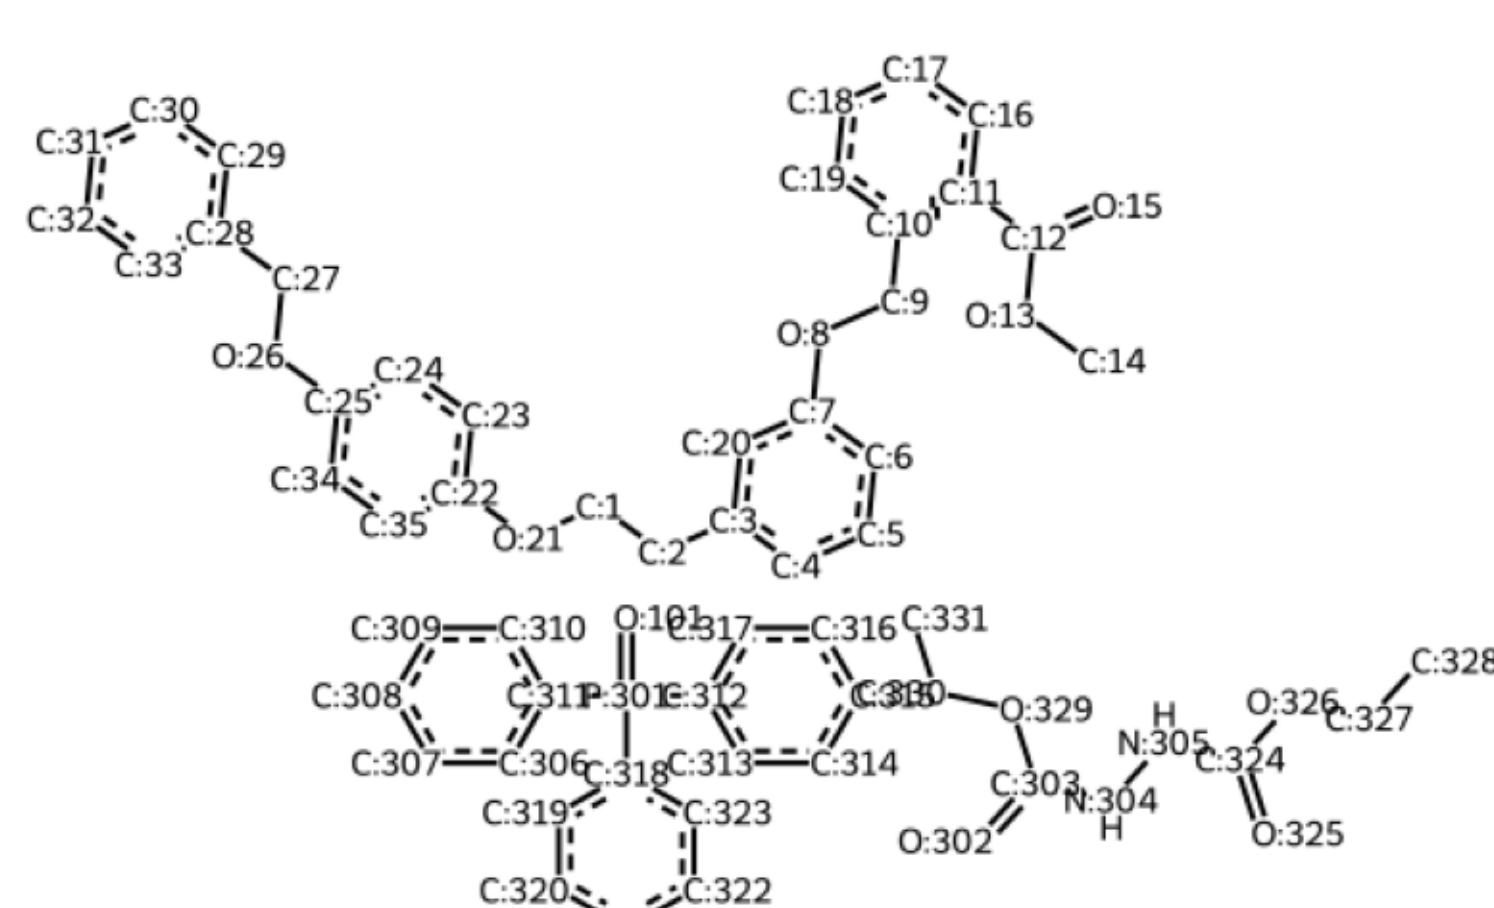



Original reaction  
sampled RXN\_ID:99)

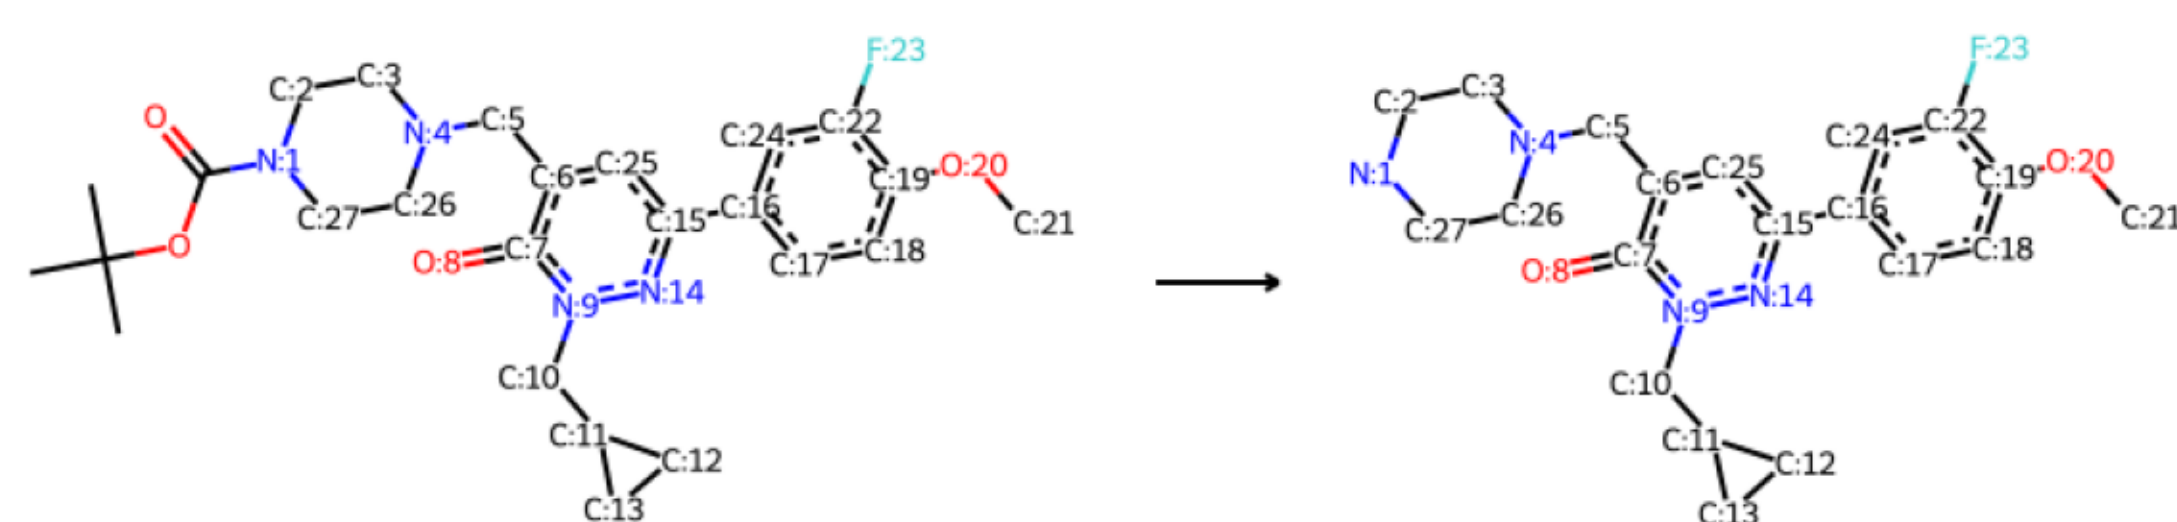

Identified mechanistic class -  
Boc\_deprotection reaction

Reaction with missing reagents recovered

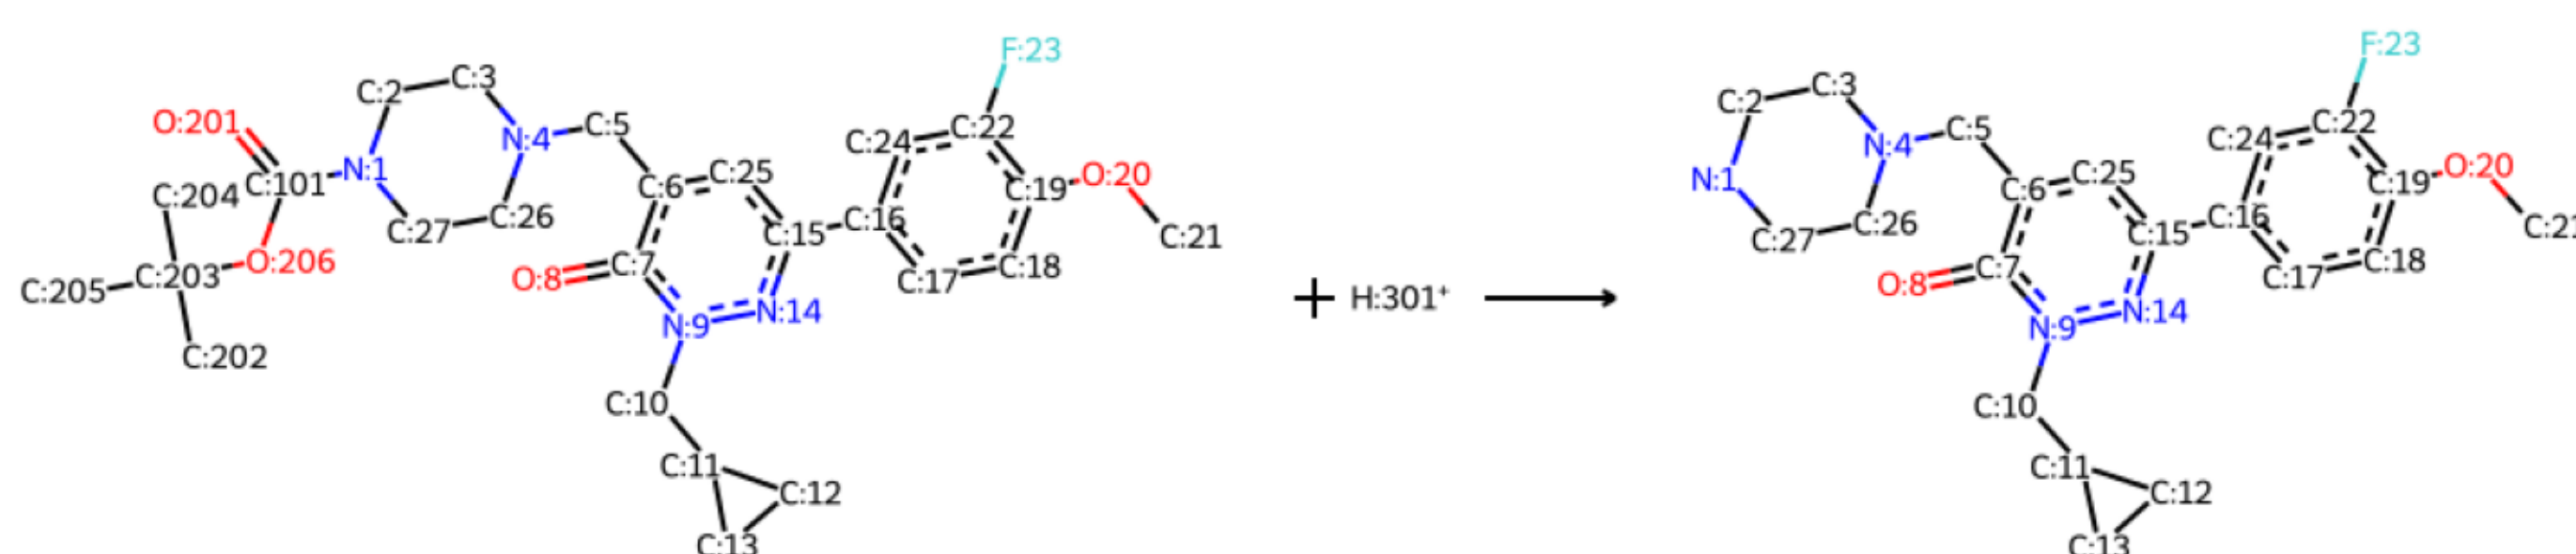

Proposed mechanistic pathway

[Arrow order: (1) green, (2) blue, (3) red, (4) orange]

step #1

step #2

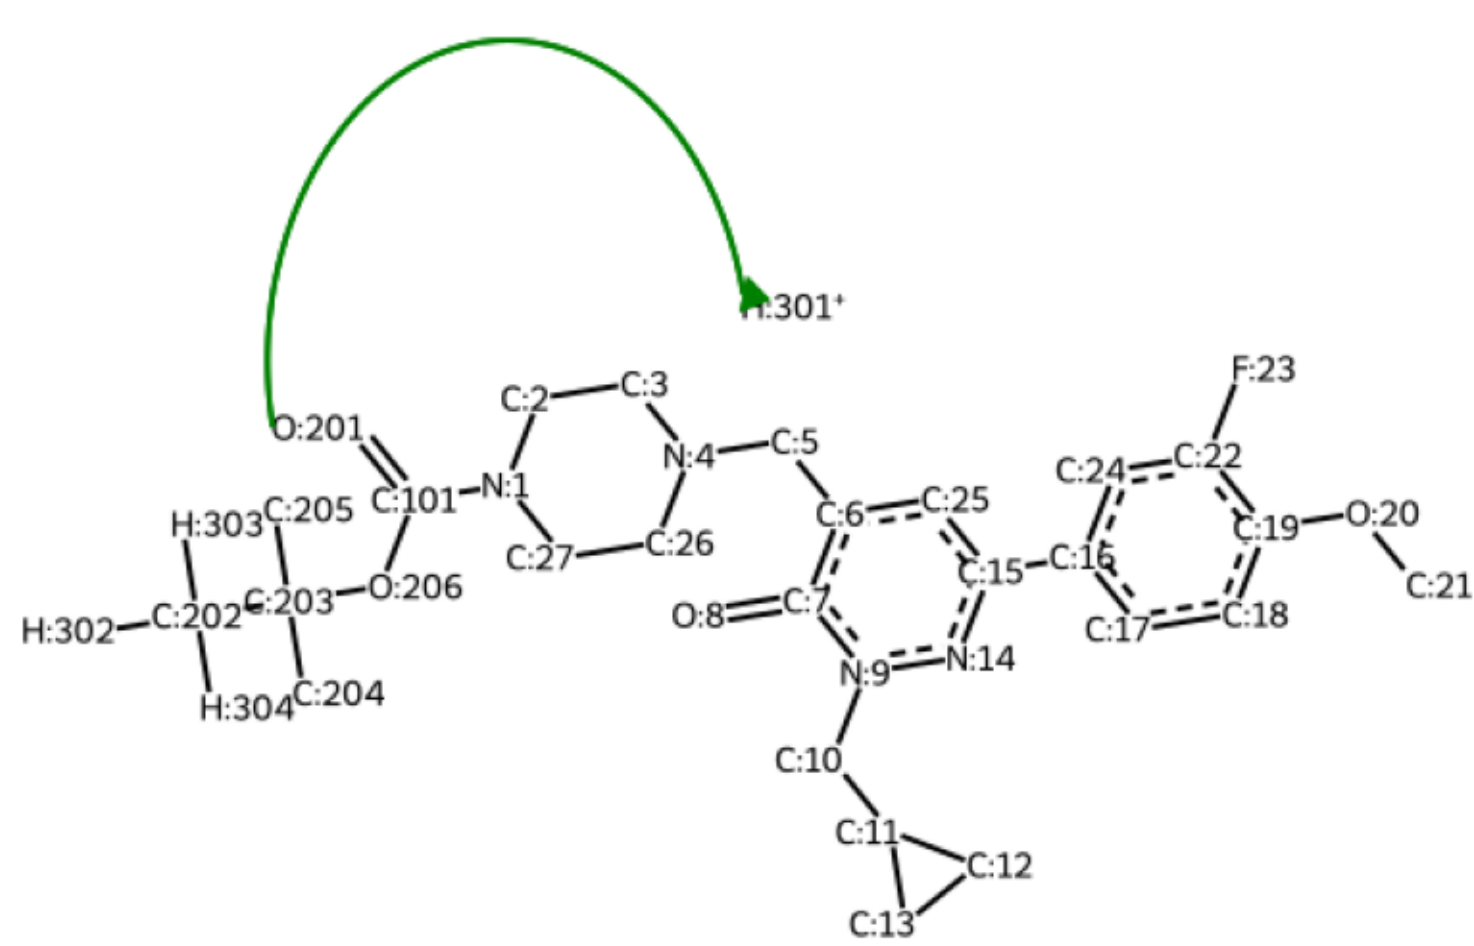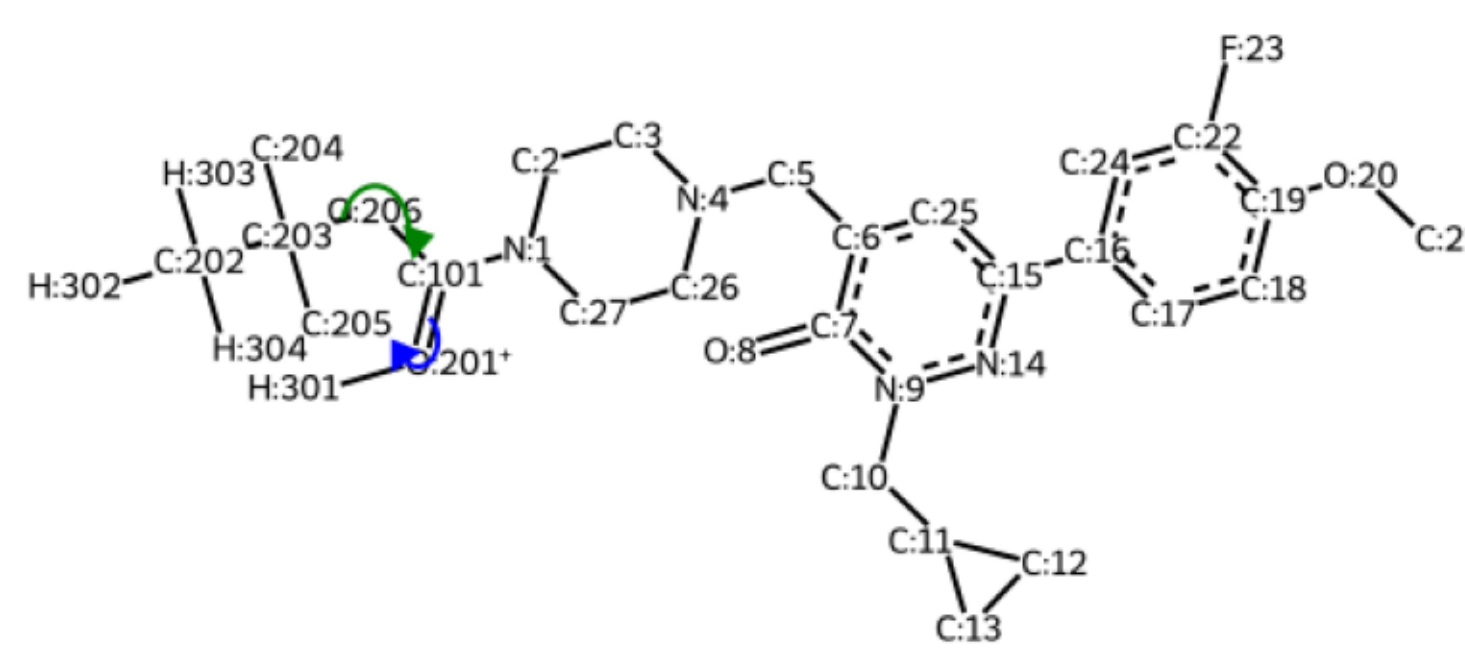

step #3

step #4

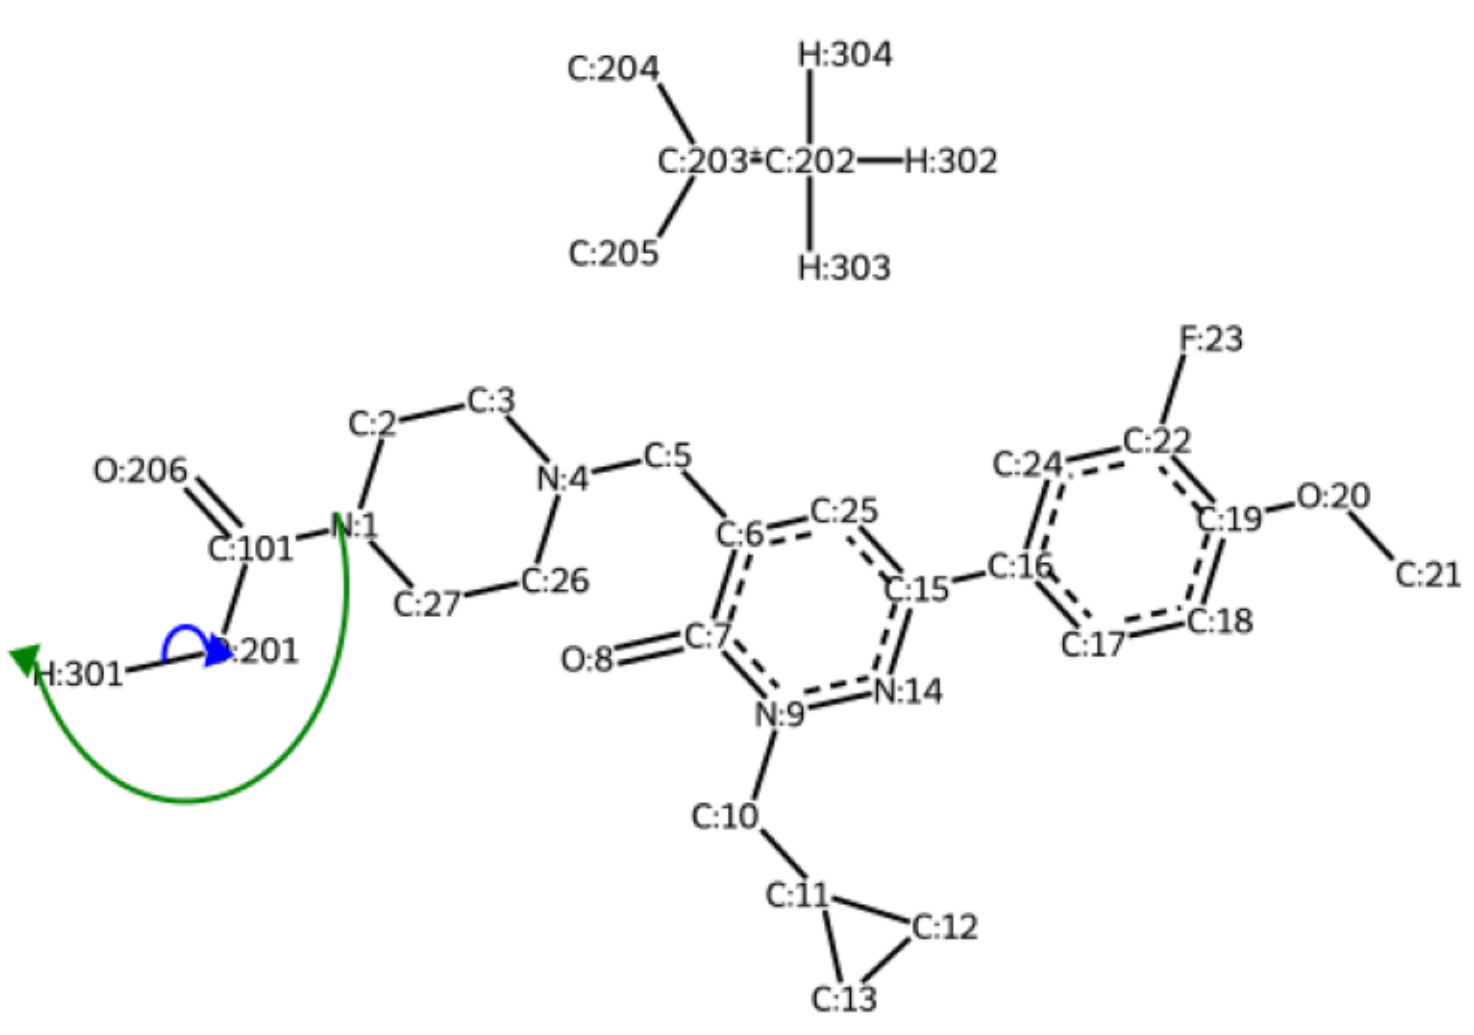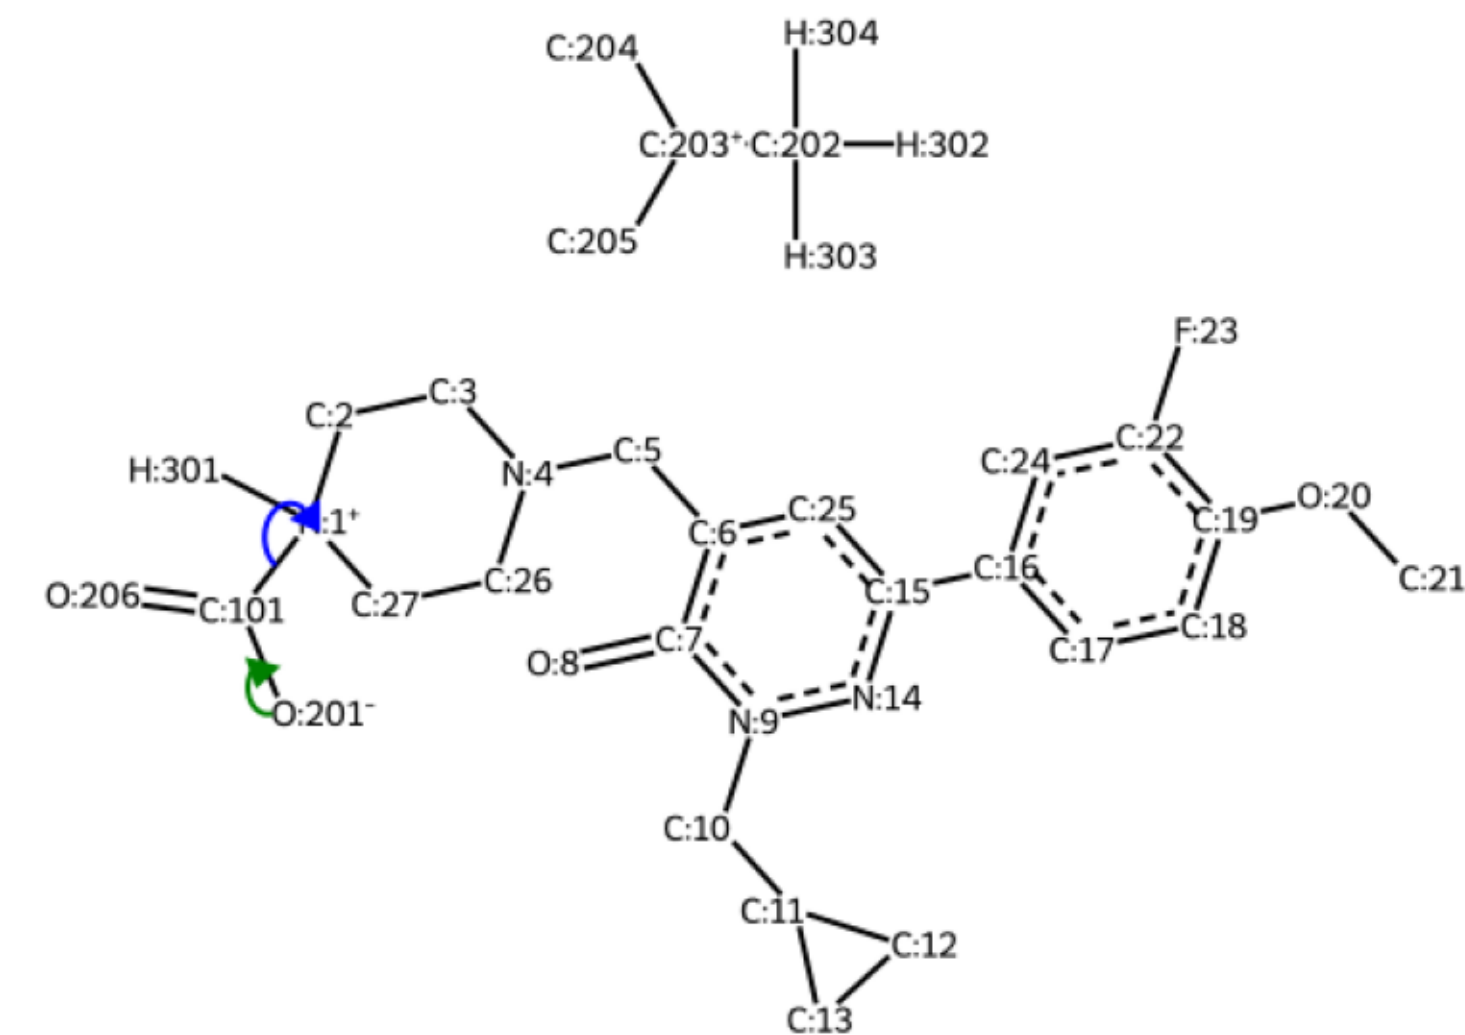

step #5

Product(s)

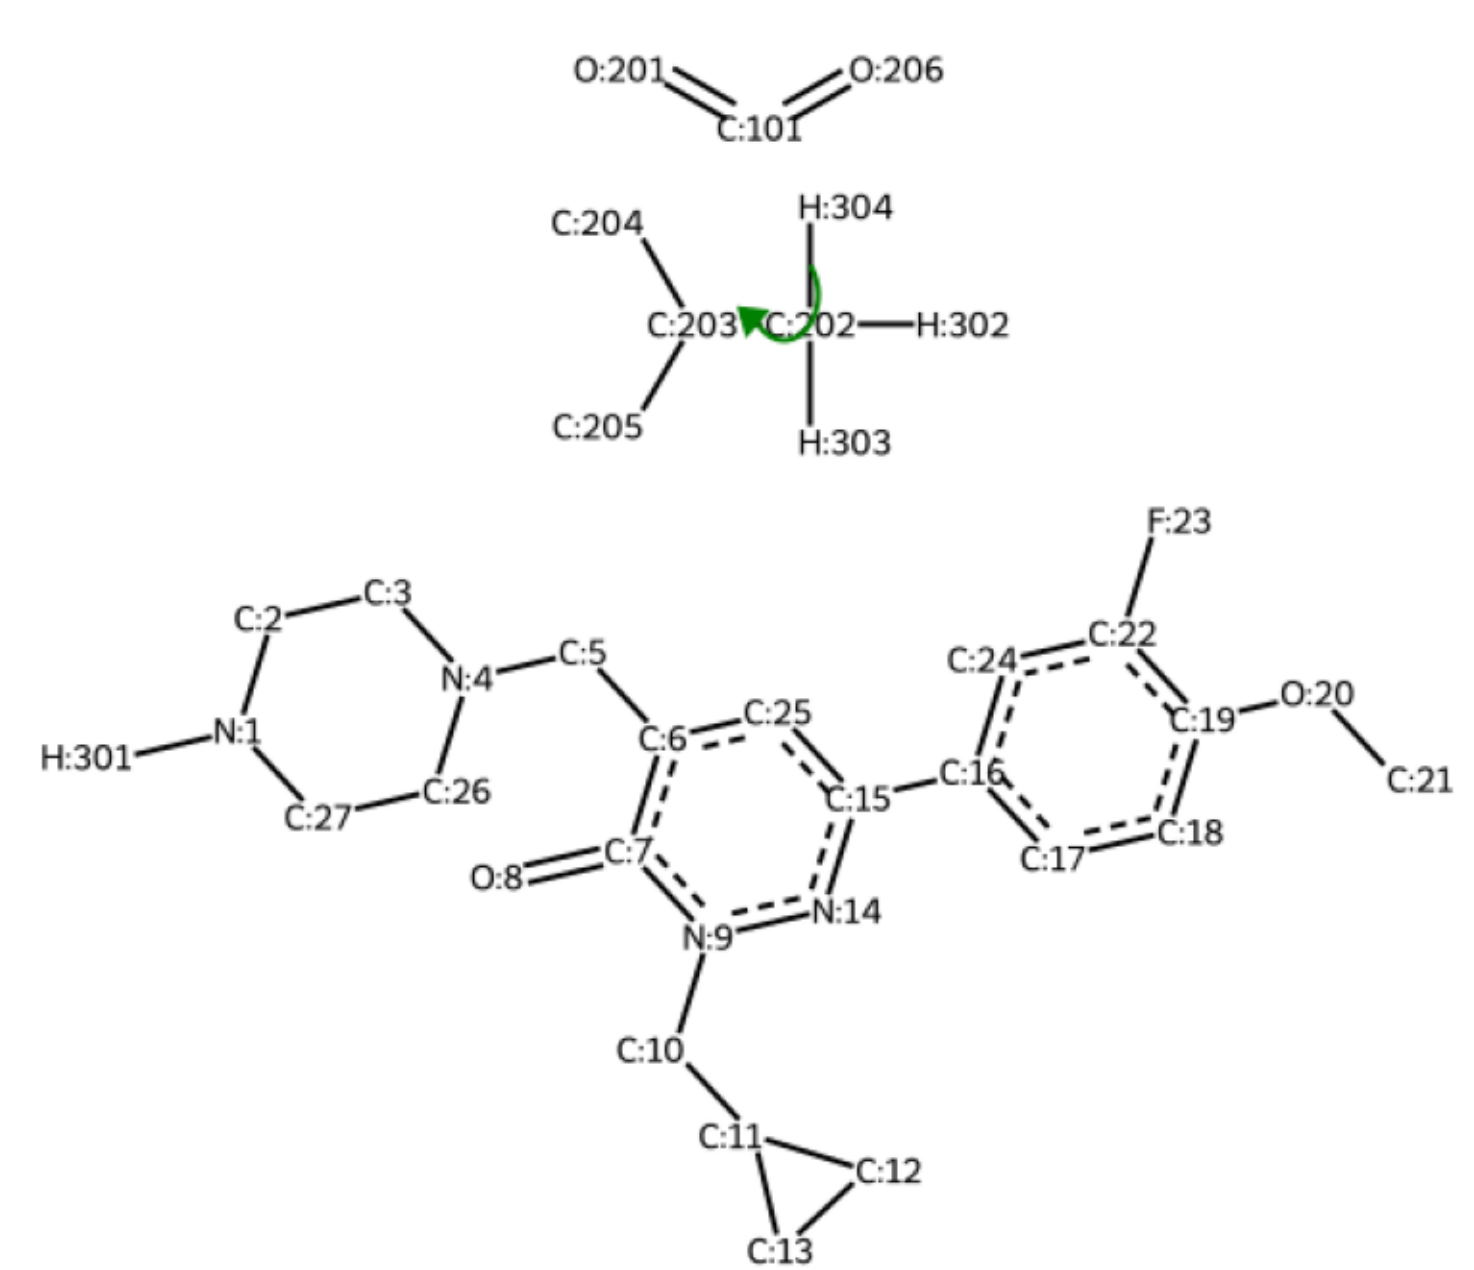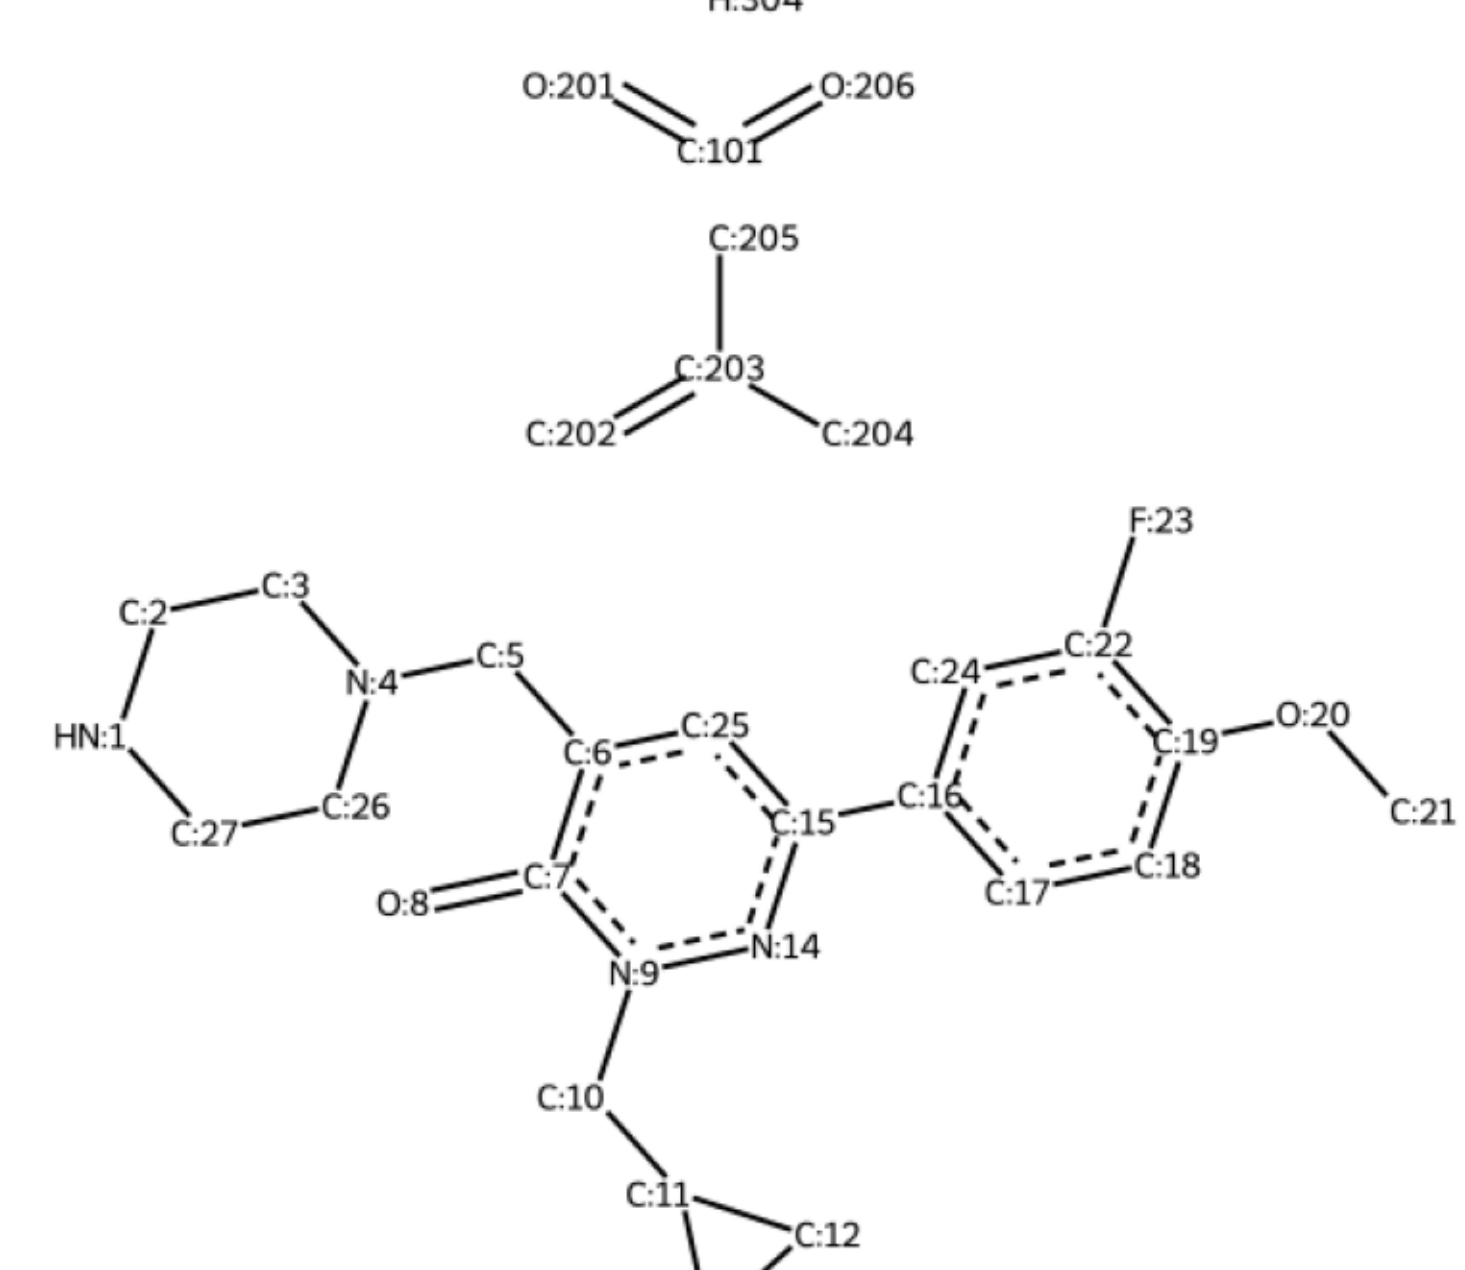



# Original reaction RXN\_ID:0

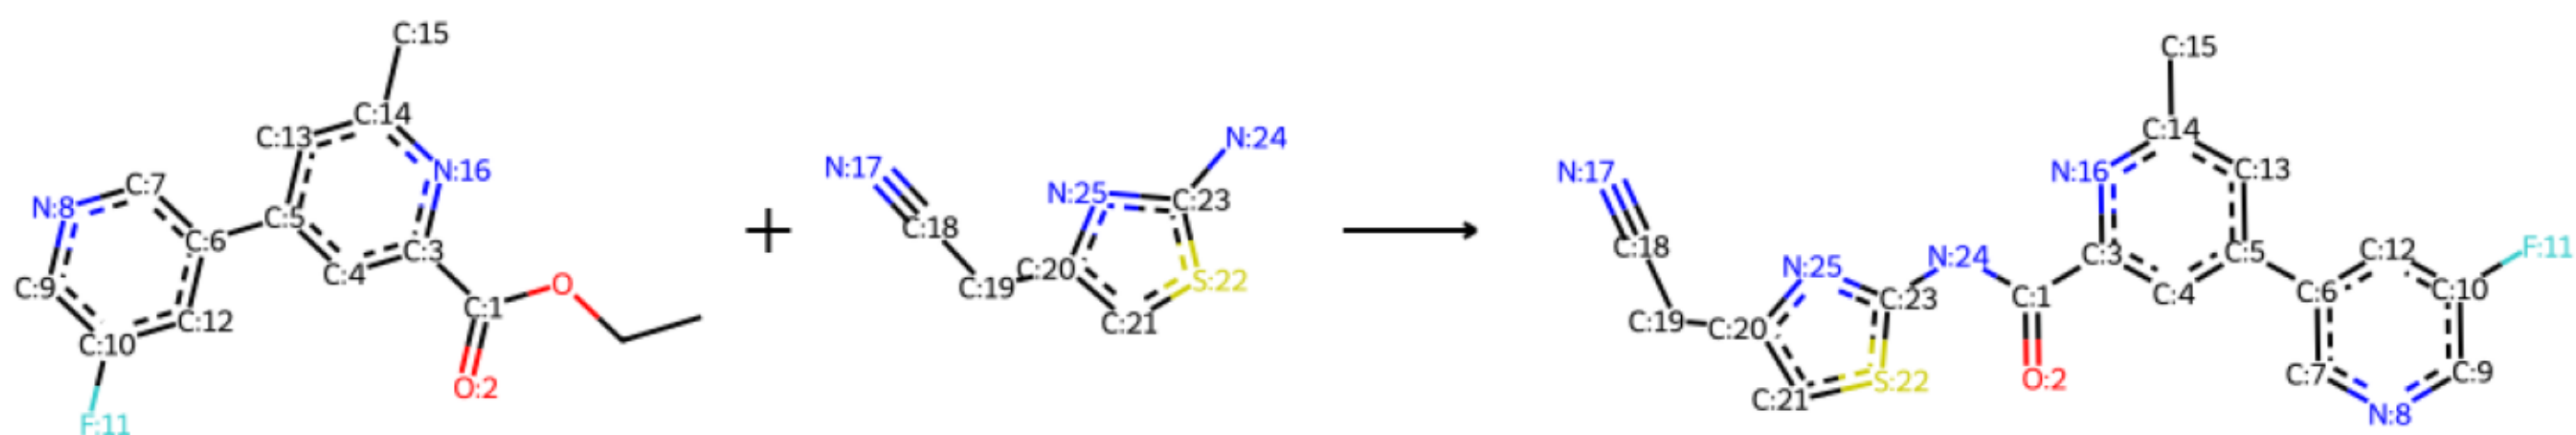

## ELECTRO-generated mechanistic pathway

[Arrow order: (1) green, (2) blue, (3) red, (4) orange]

step #1

Product(s)

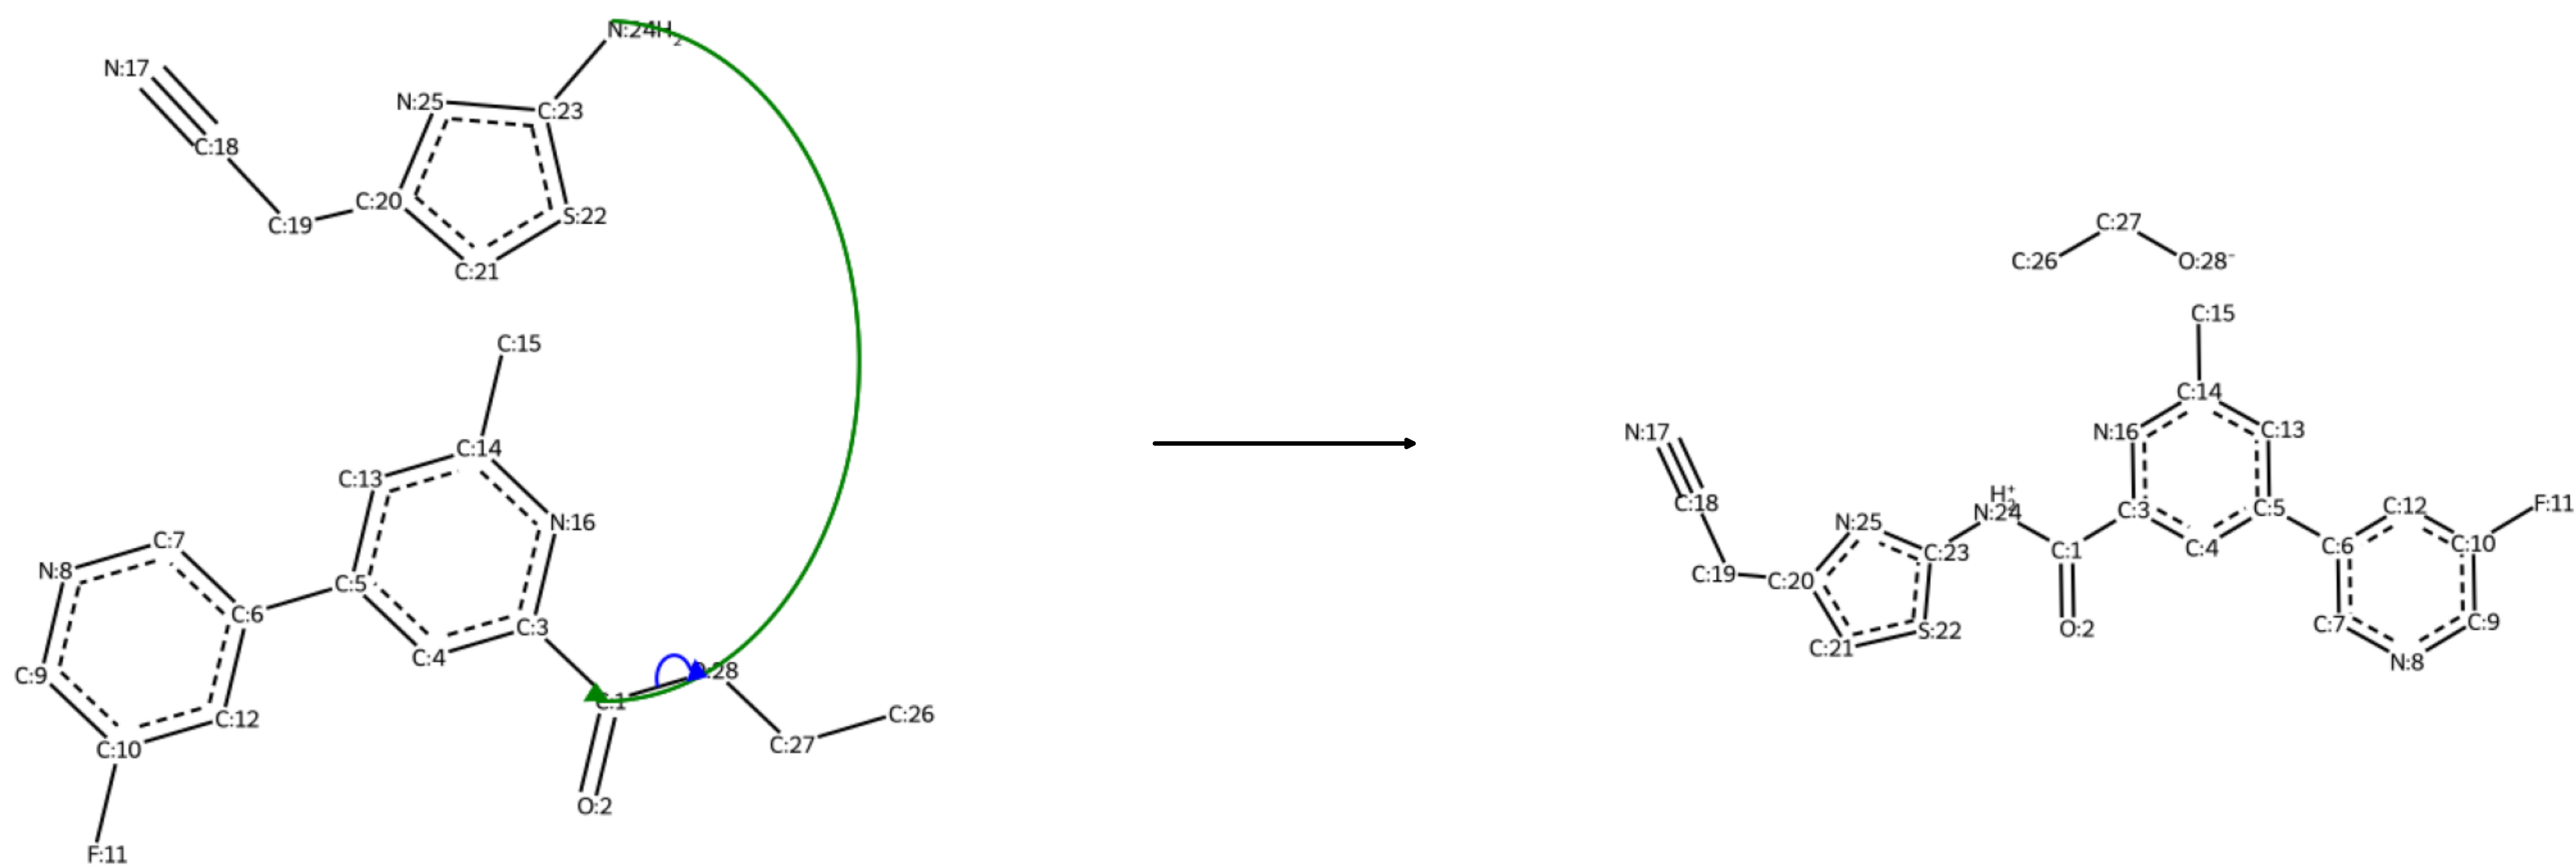

# Original reaction RXN\_ID:1

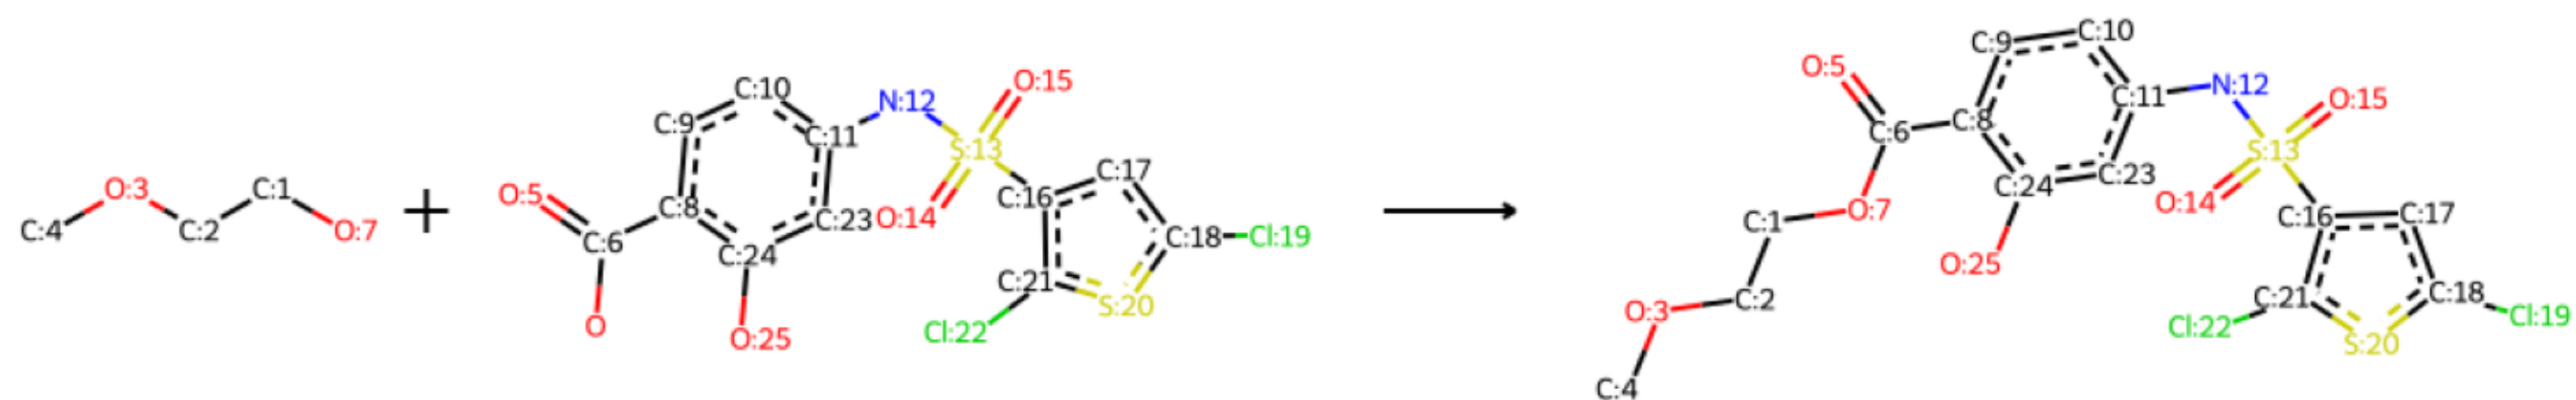

## ELECTRO-generated mechanistic pathway

[Arrow order: (1) green, (2) blue, (3) red, (4) orange]

step #1

Product(s)

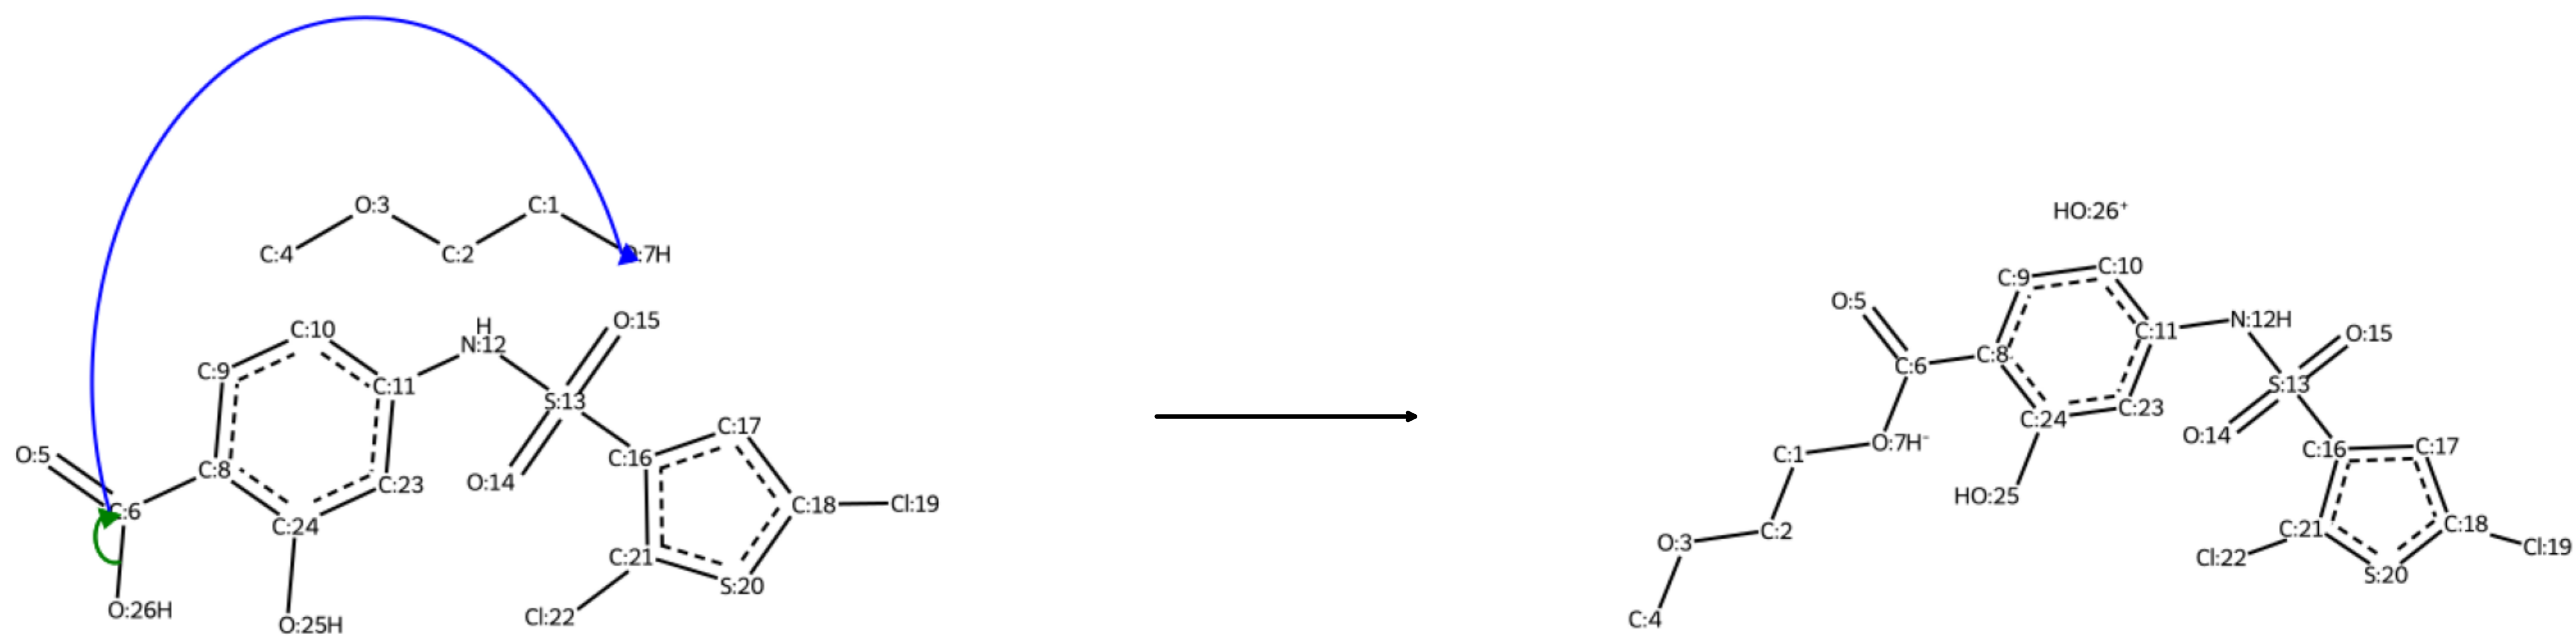



# Original reaction RXN\_ID:2

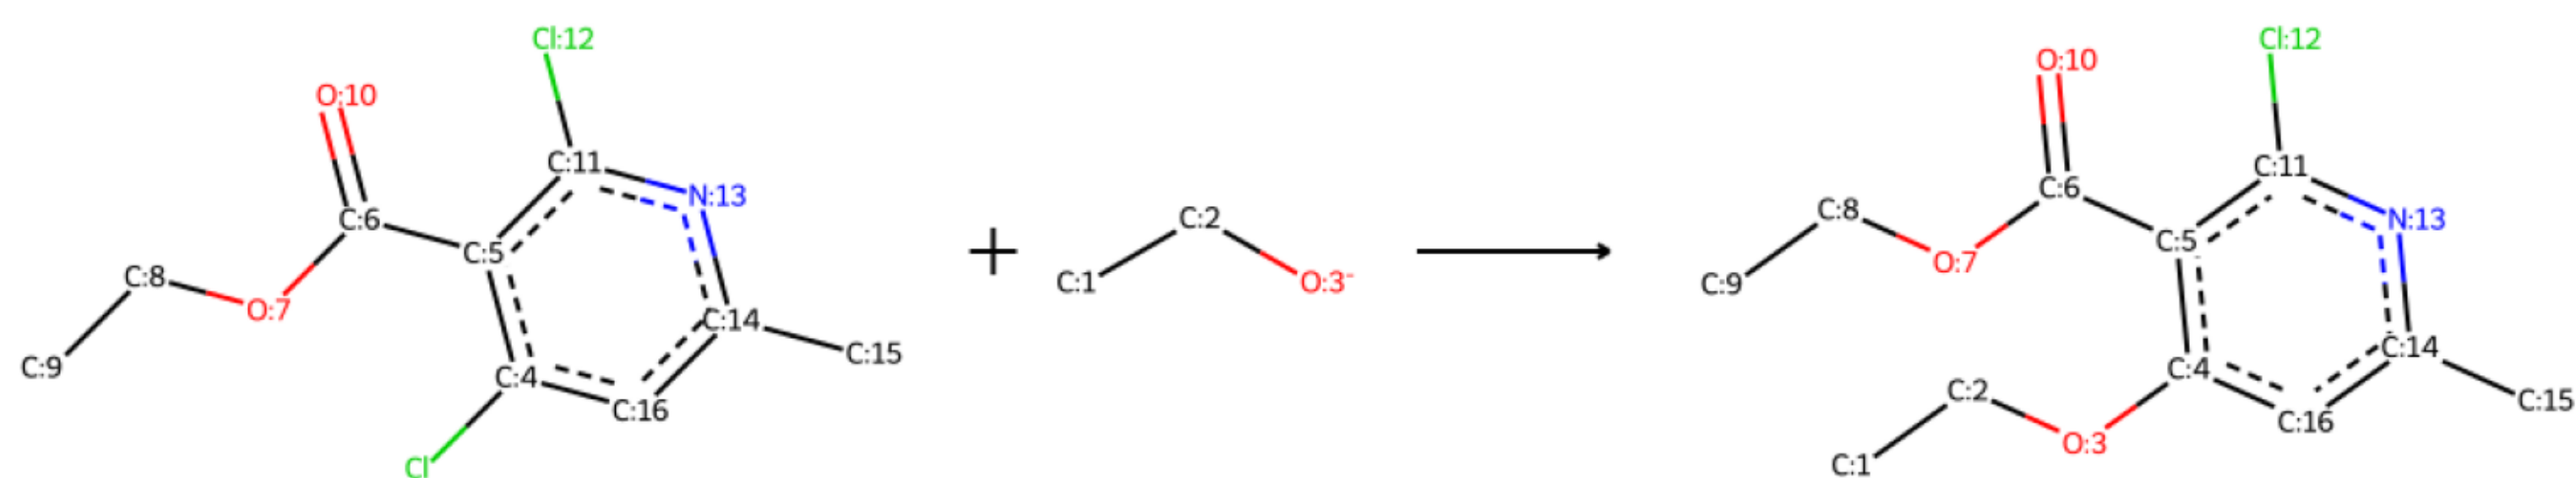

## ELECTRO-generated mechanistic pathway

[Arrow order: (1) green, (2) blue, (3) red, (4) orange]

step #1

Product(s)

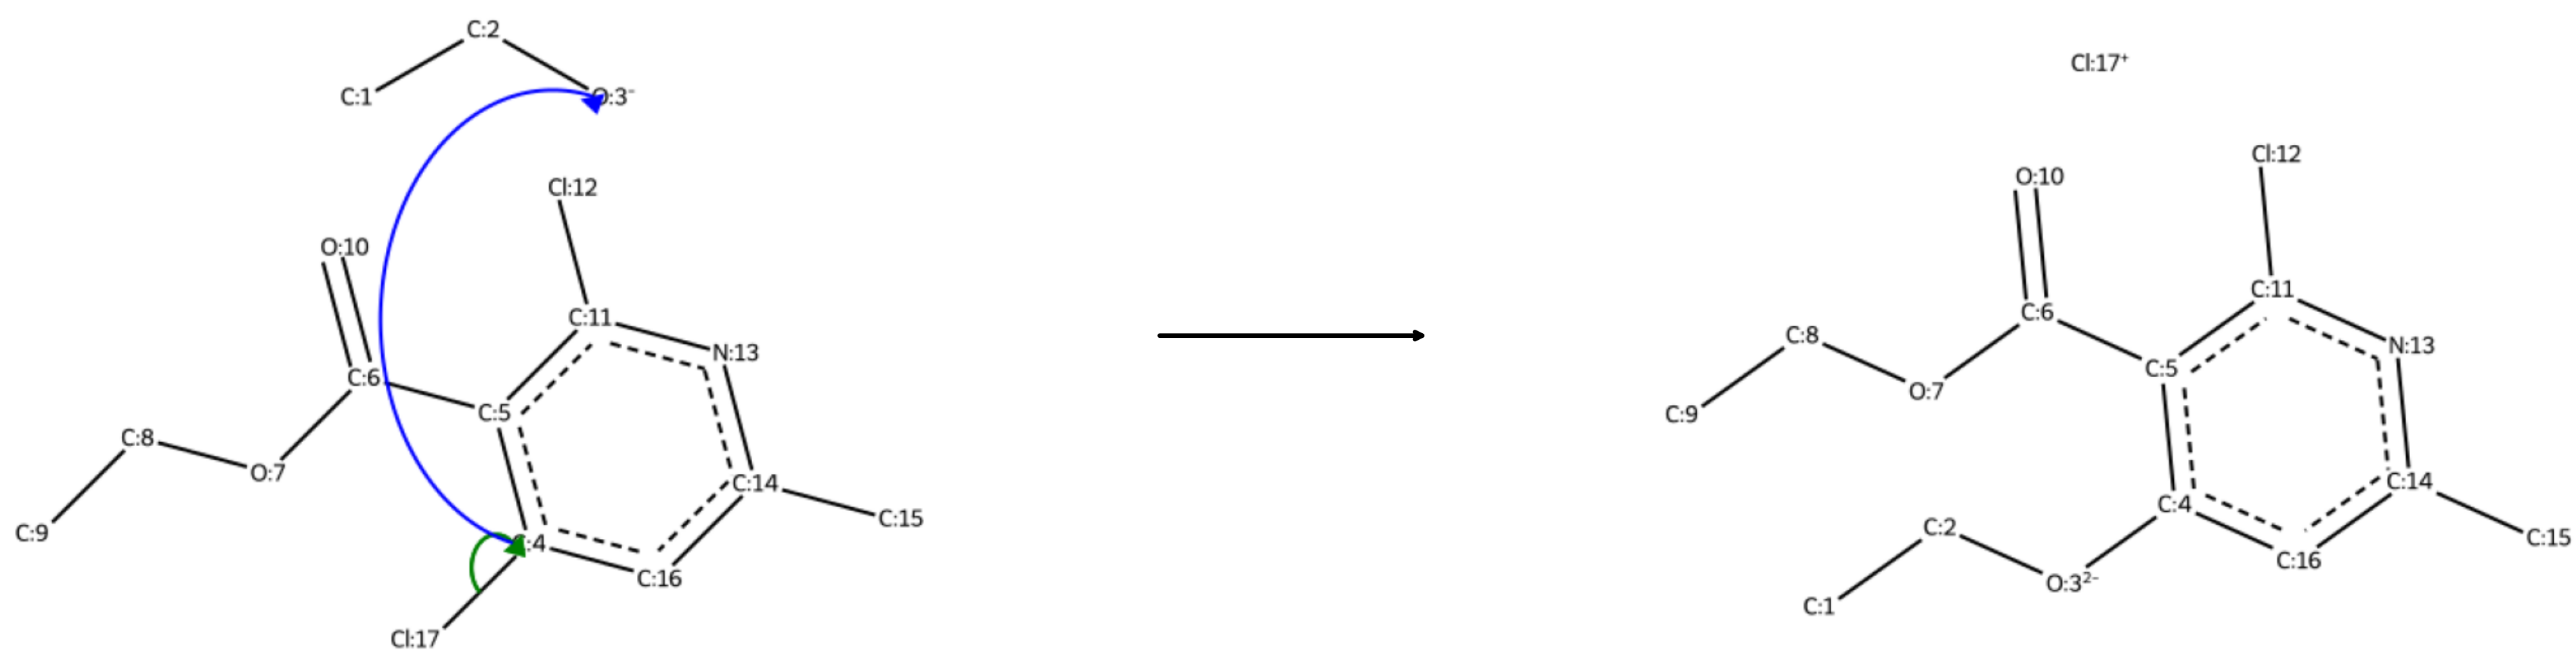

# Original reaction RXN\_ID:3

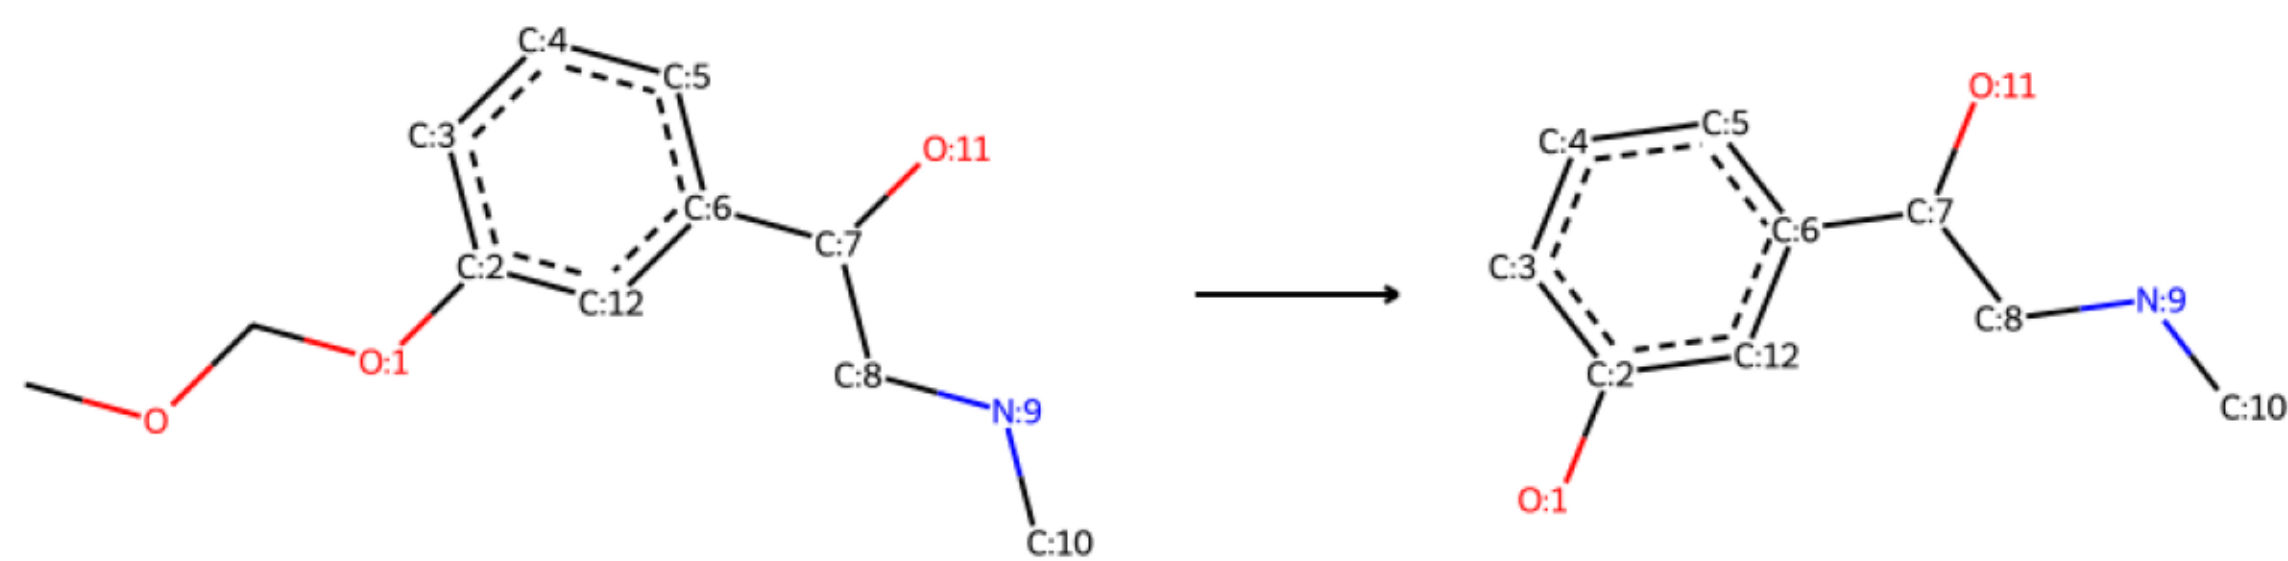

## ELECTRO-generated mechanistic pathway

[Arrow order: (1) green, (2) blue, (3) red, (4) orange]

step #1

Product(s)

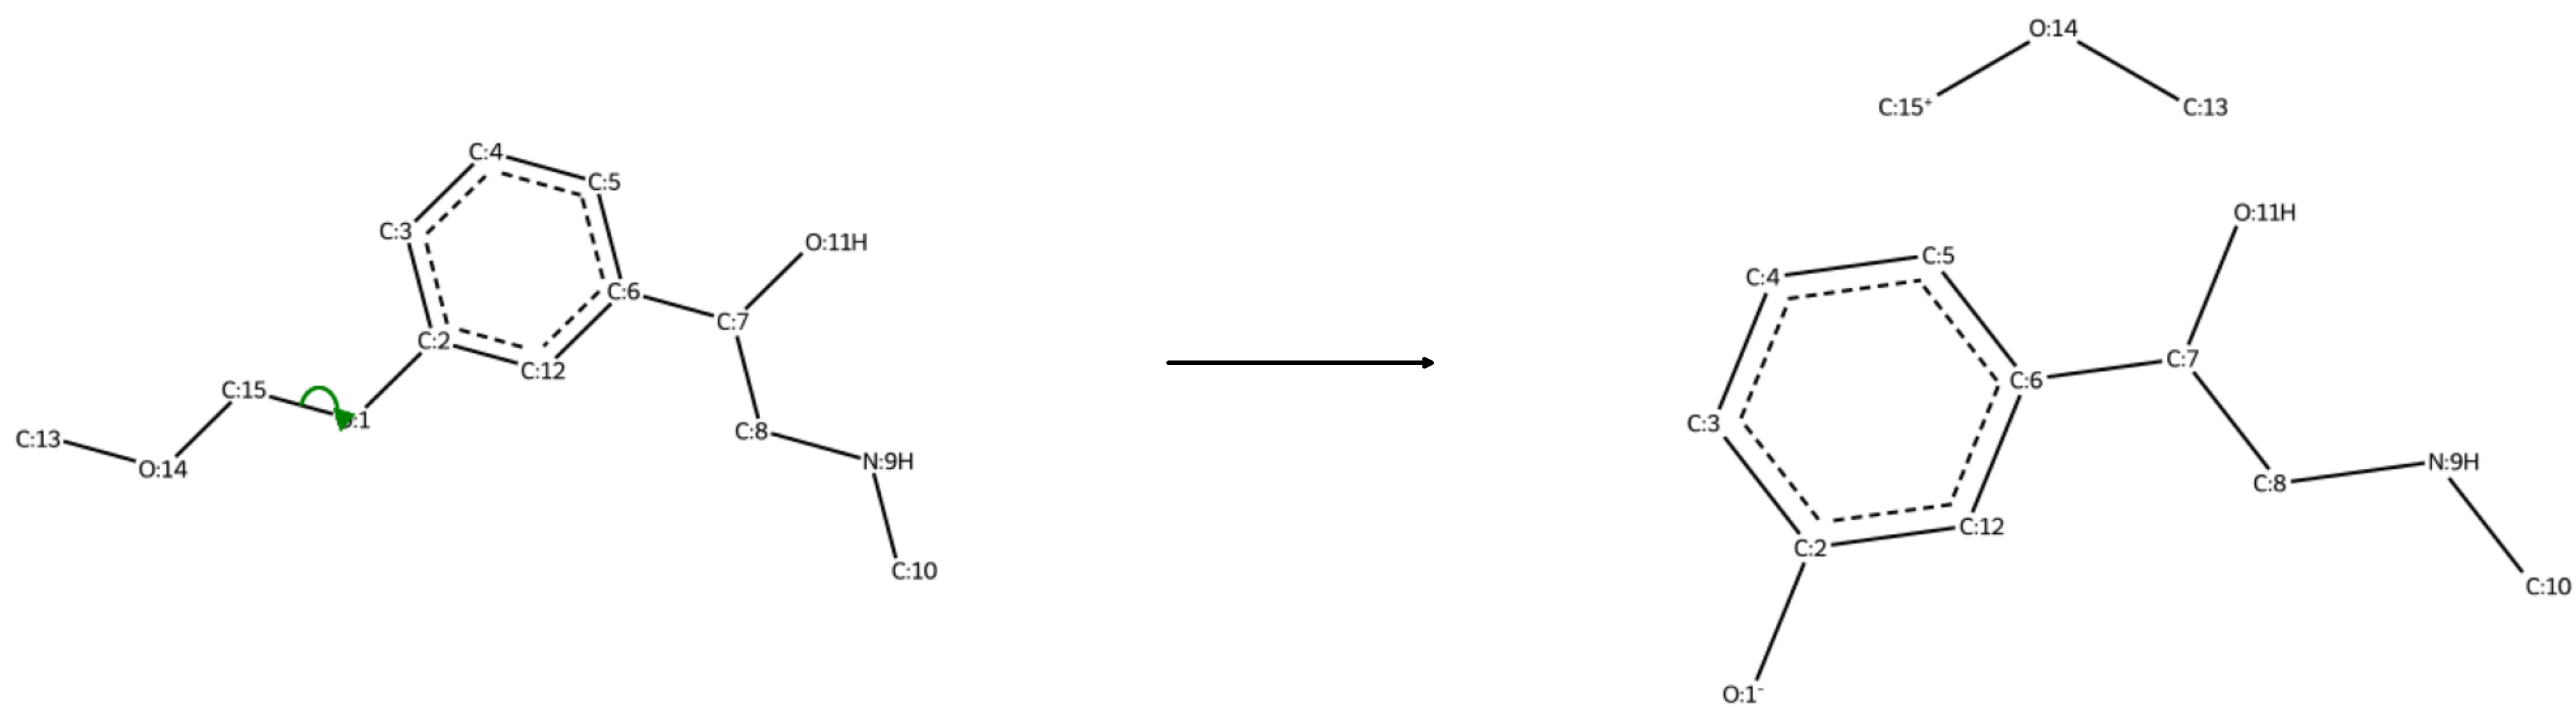



# Original reaction RXN\_ID:4

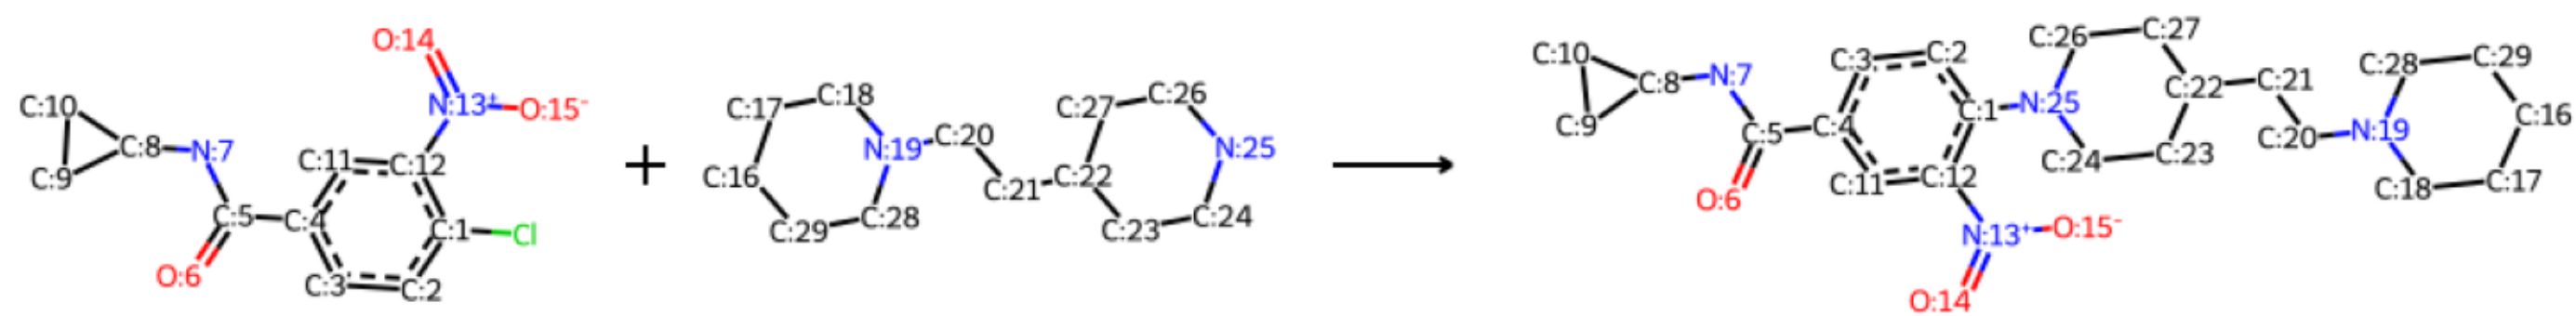

## ELECTRO-generated mechanistic pathway

[Arrow order: (1) green, (2) blue, (3) red, (4) orange]

step #1

Product(s)

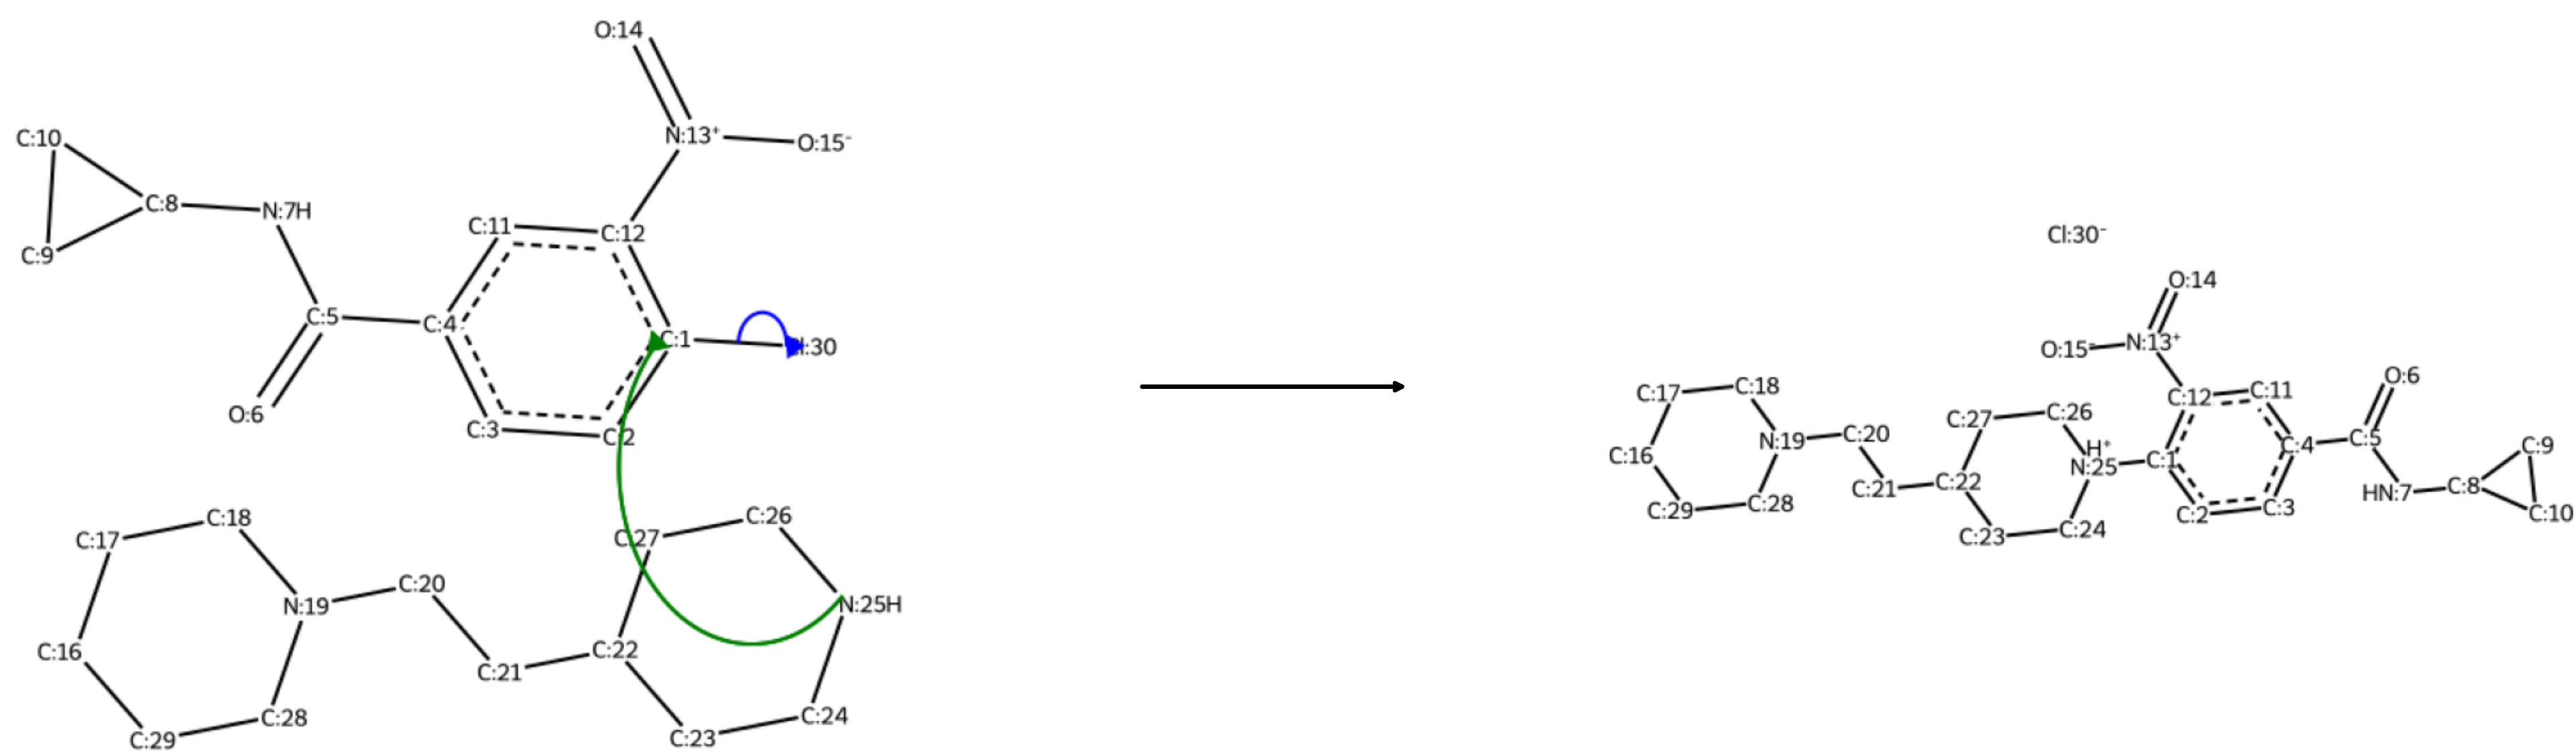

# Original reaction RXN\_ID:5

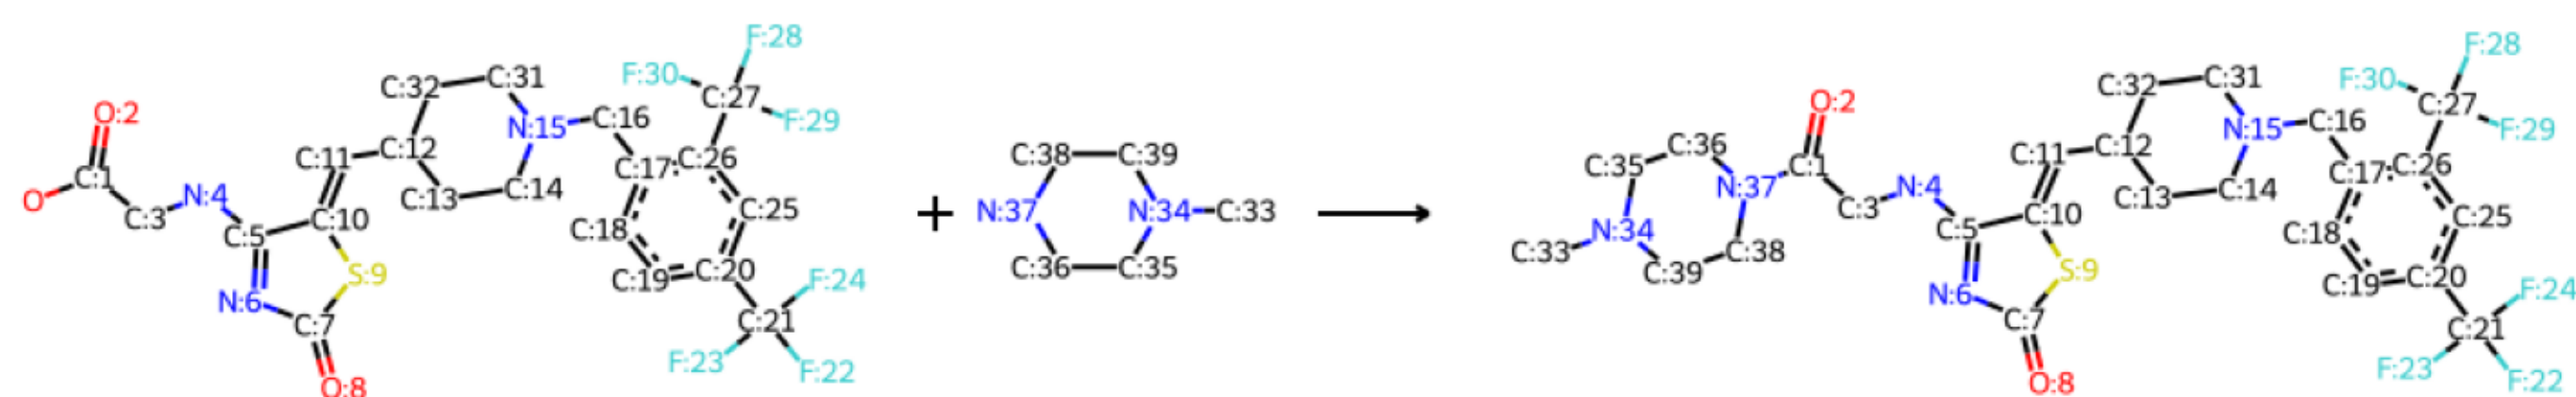

## ELECTRO-generated mechanistic pathway

[Arrow order: (1) green, (2) blue, (3) red, (4) orange]

step #1

Product(s)

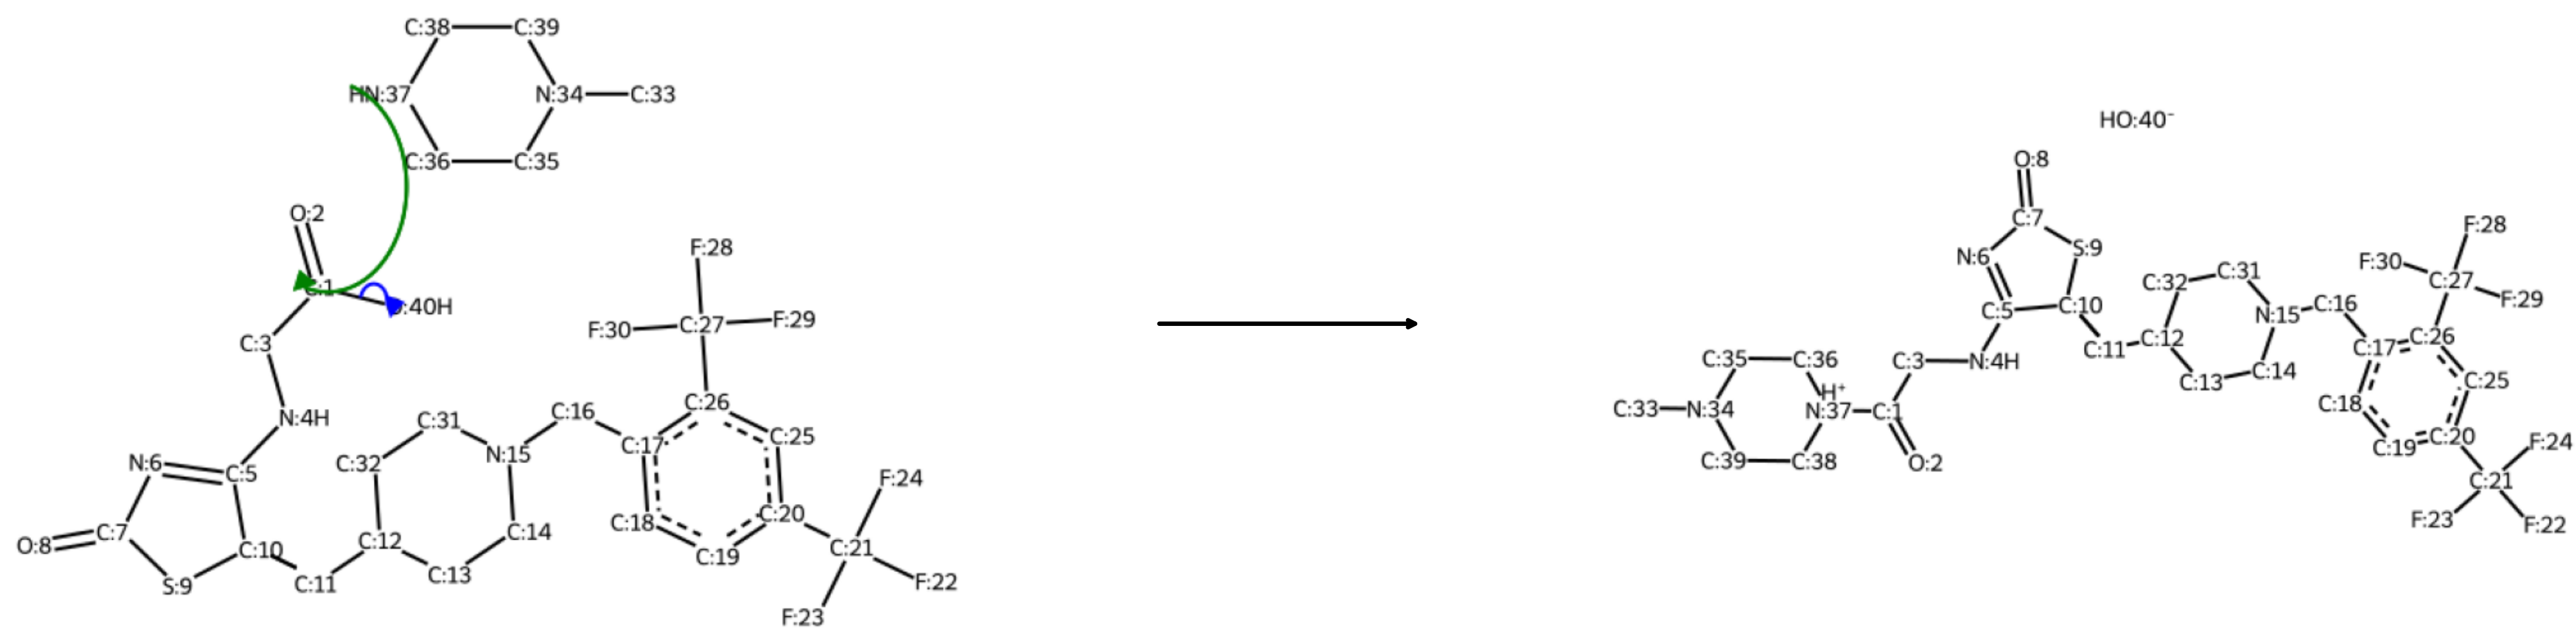



# Original reaction RXN\_ID:6

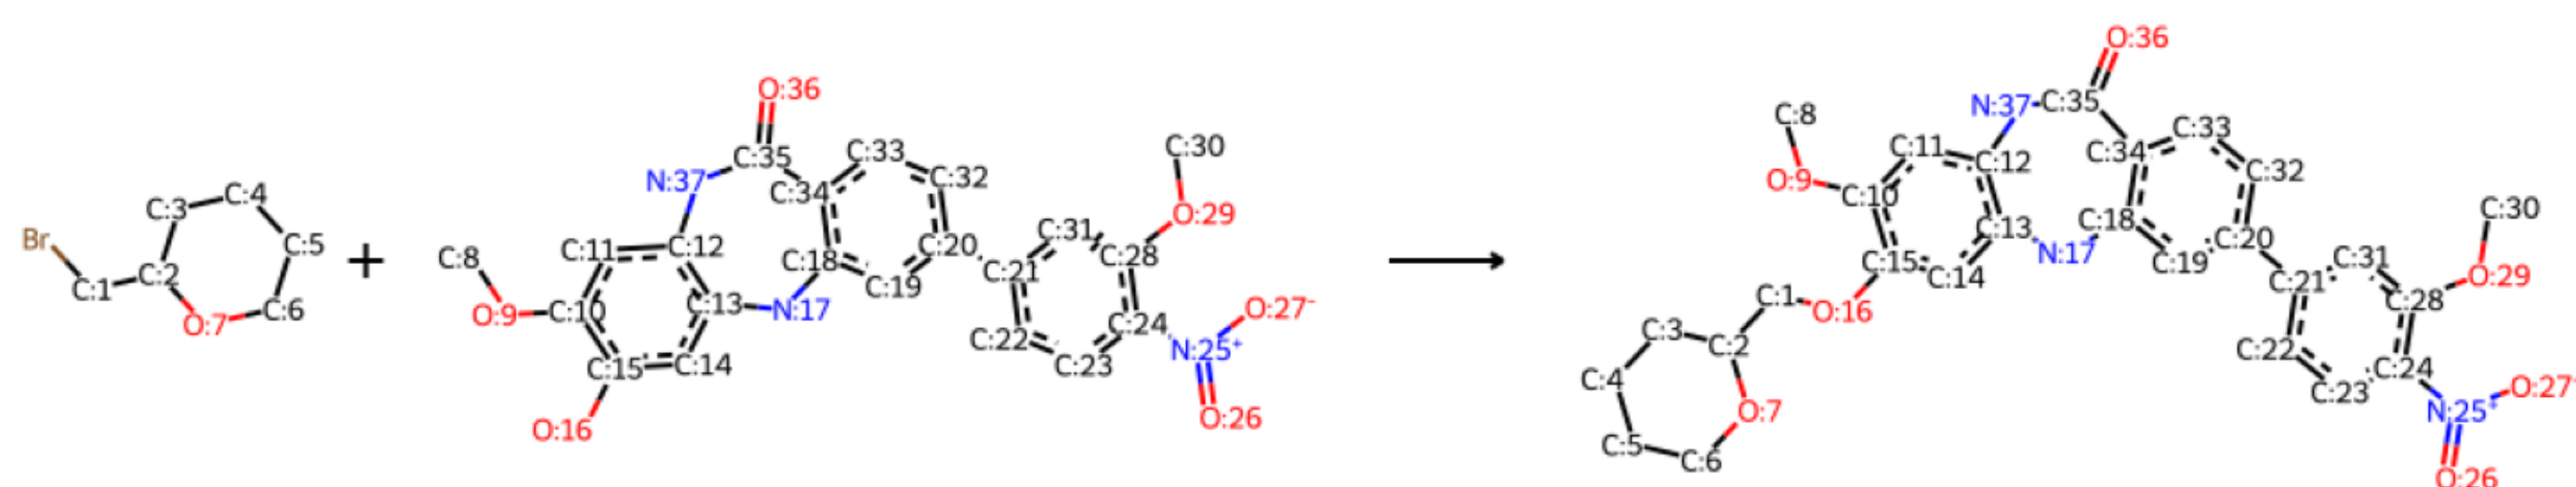

## ELECTRO-generated mechanistic pathway

[Arrow order: (1) green, (2) blue, (3) red, (4) orange]

step #1

Product(s)

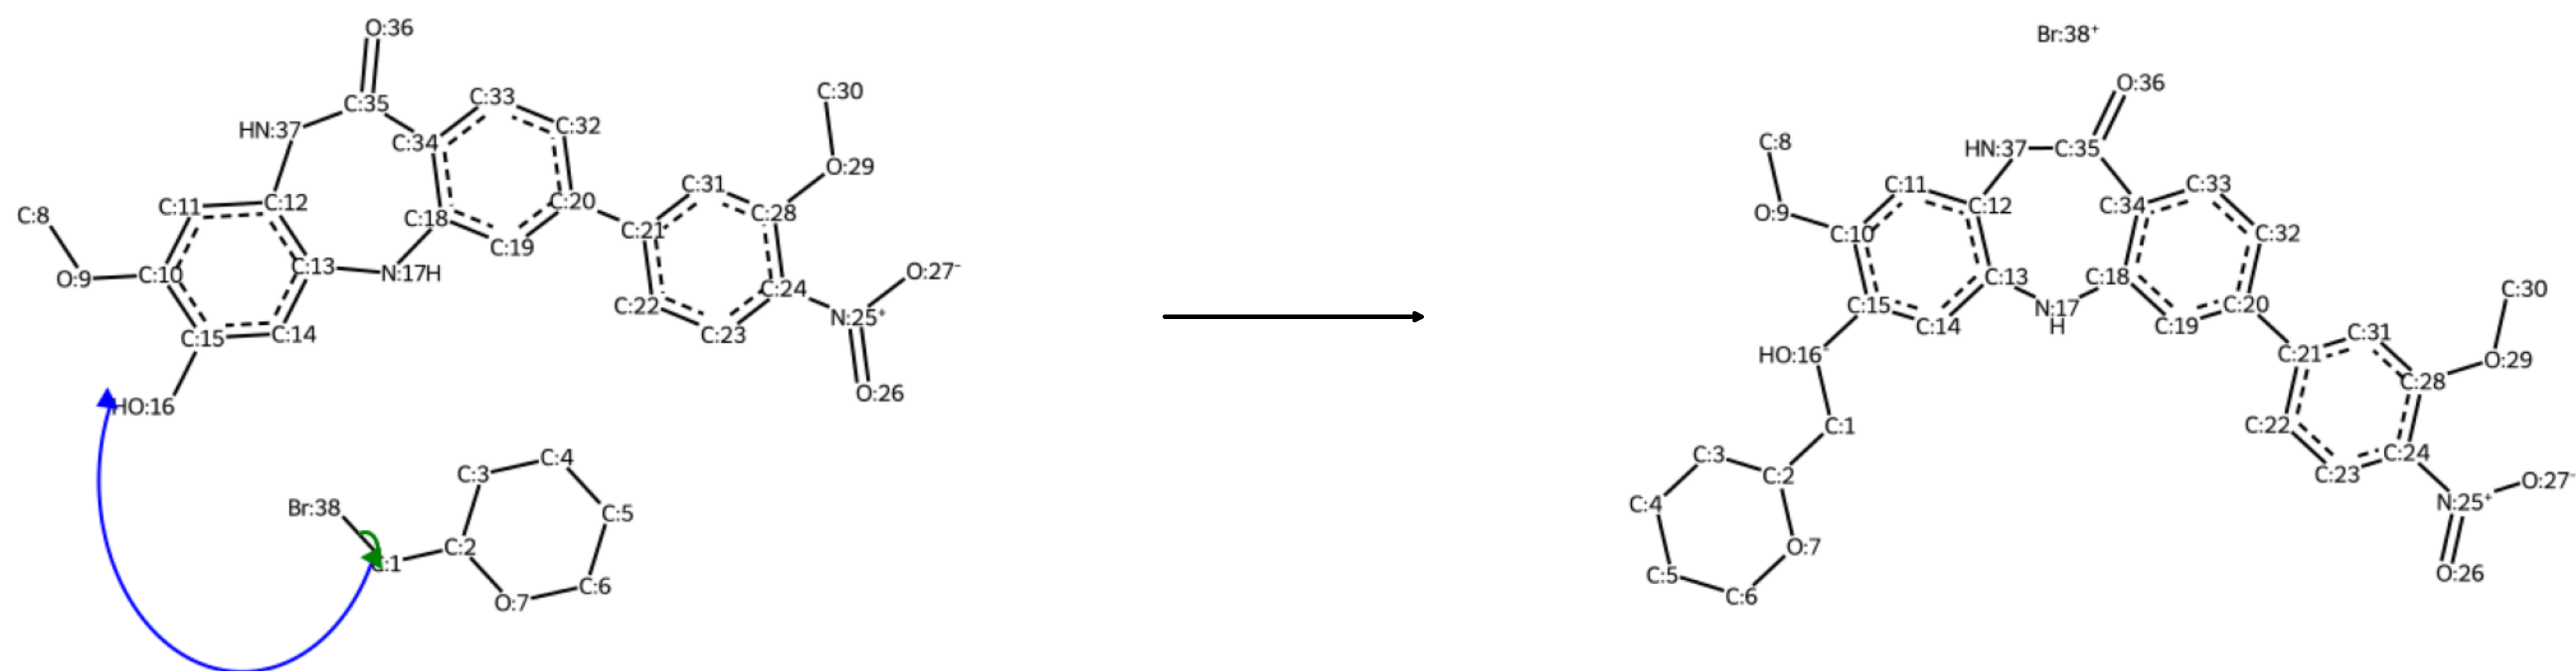

# Original reaction RXN\_ID:7

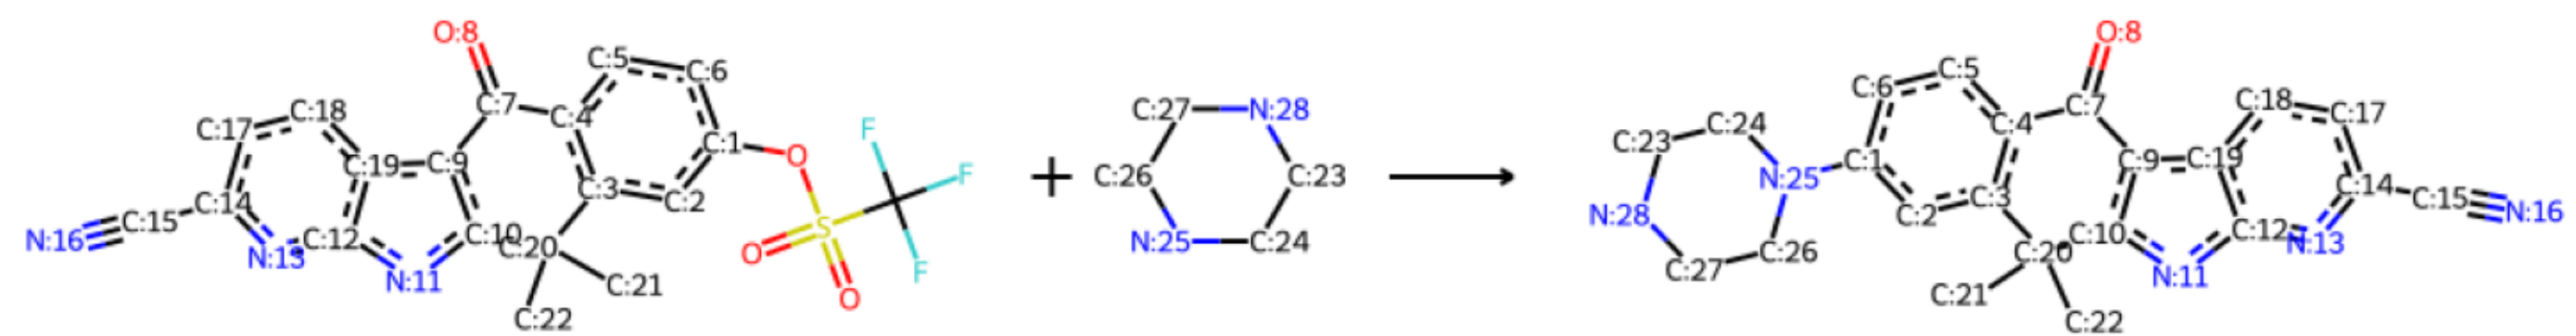

## ELECTRO-generated mechanistic pathway

[Arrow order: (1) green, (2) blue, (3) red, (4) orange]

step #1

Product(s)

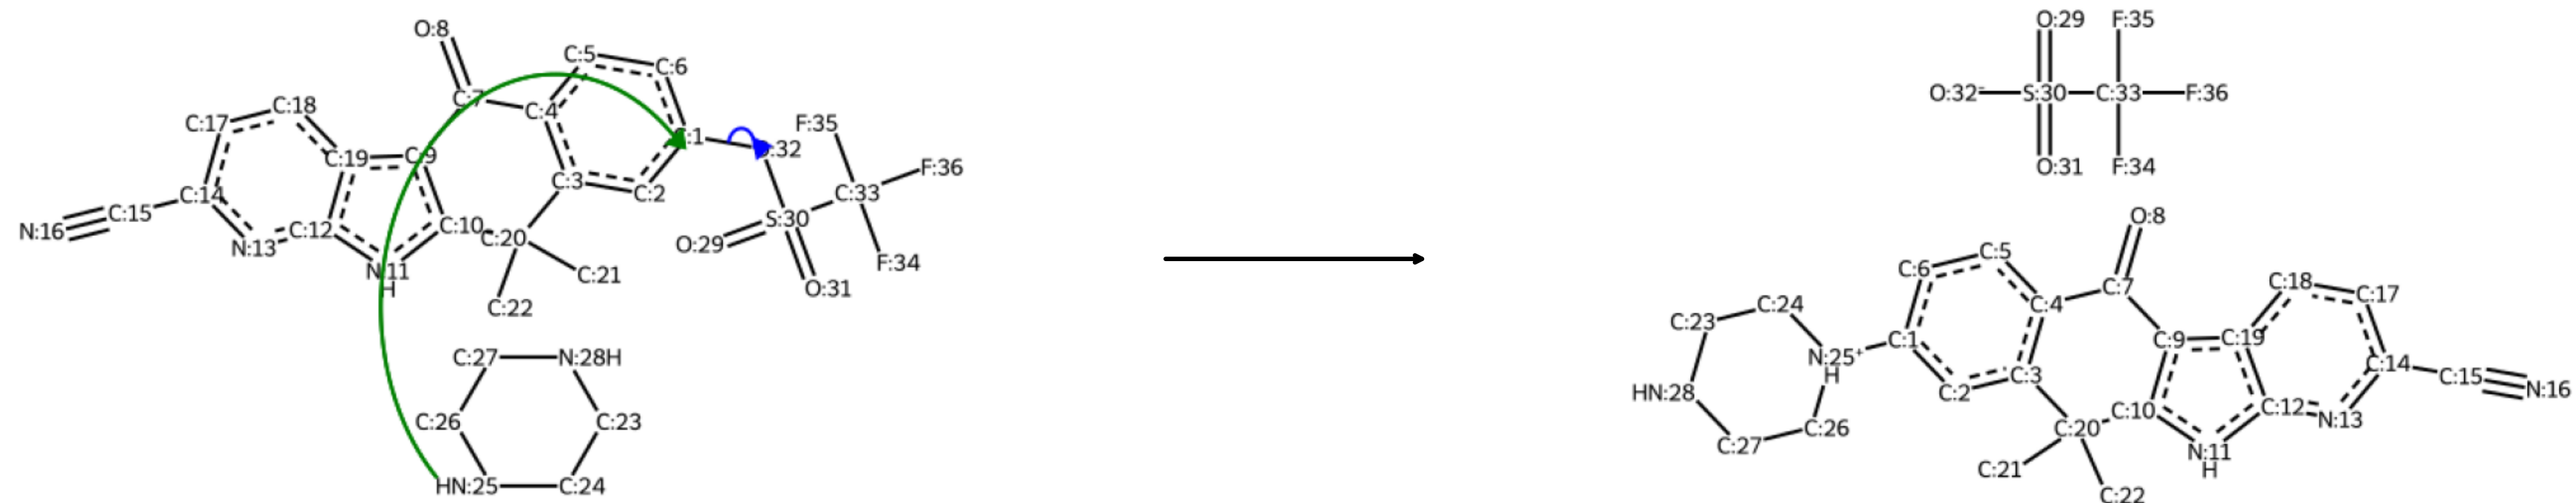



# Original reaction RXN\_ID:8

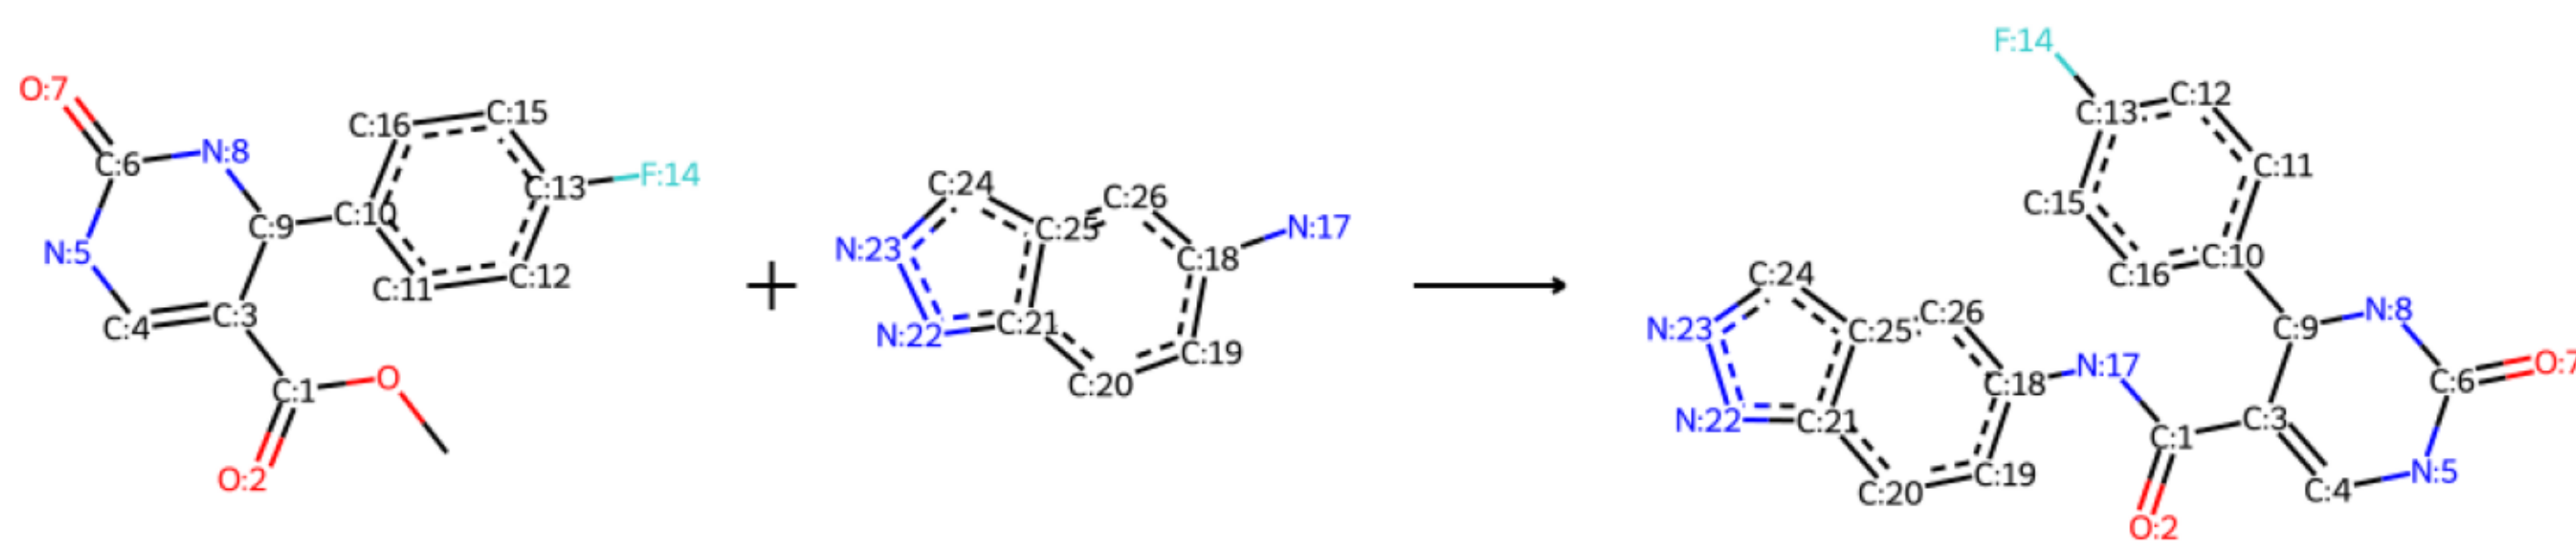

## ELECTRO-generated mechanistic pathway

[Arrow order: (1) green, (2) blue, (3) red, (4) orange]

step #1

Product(s)

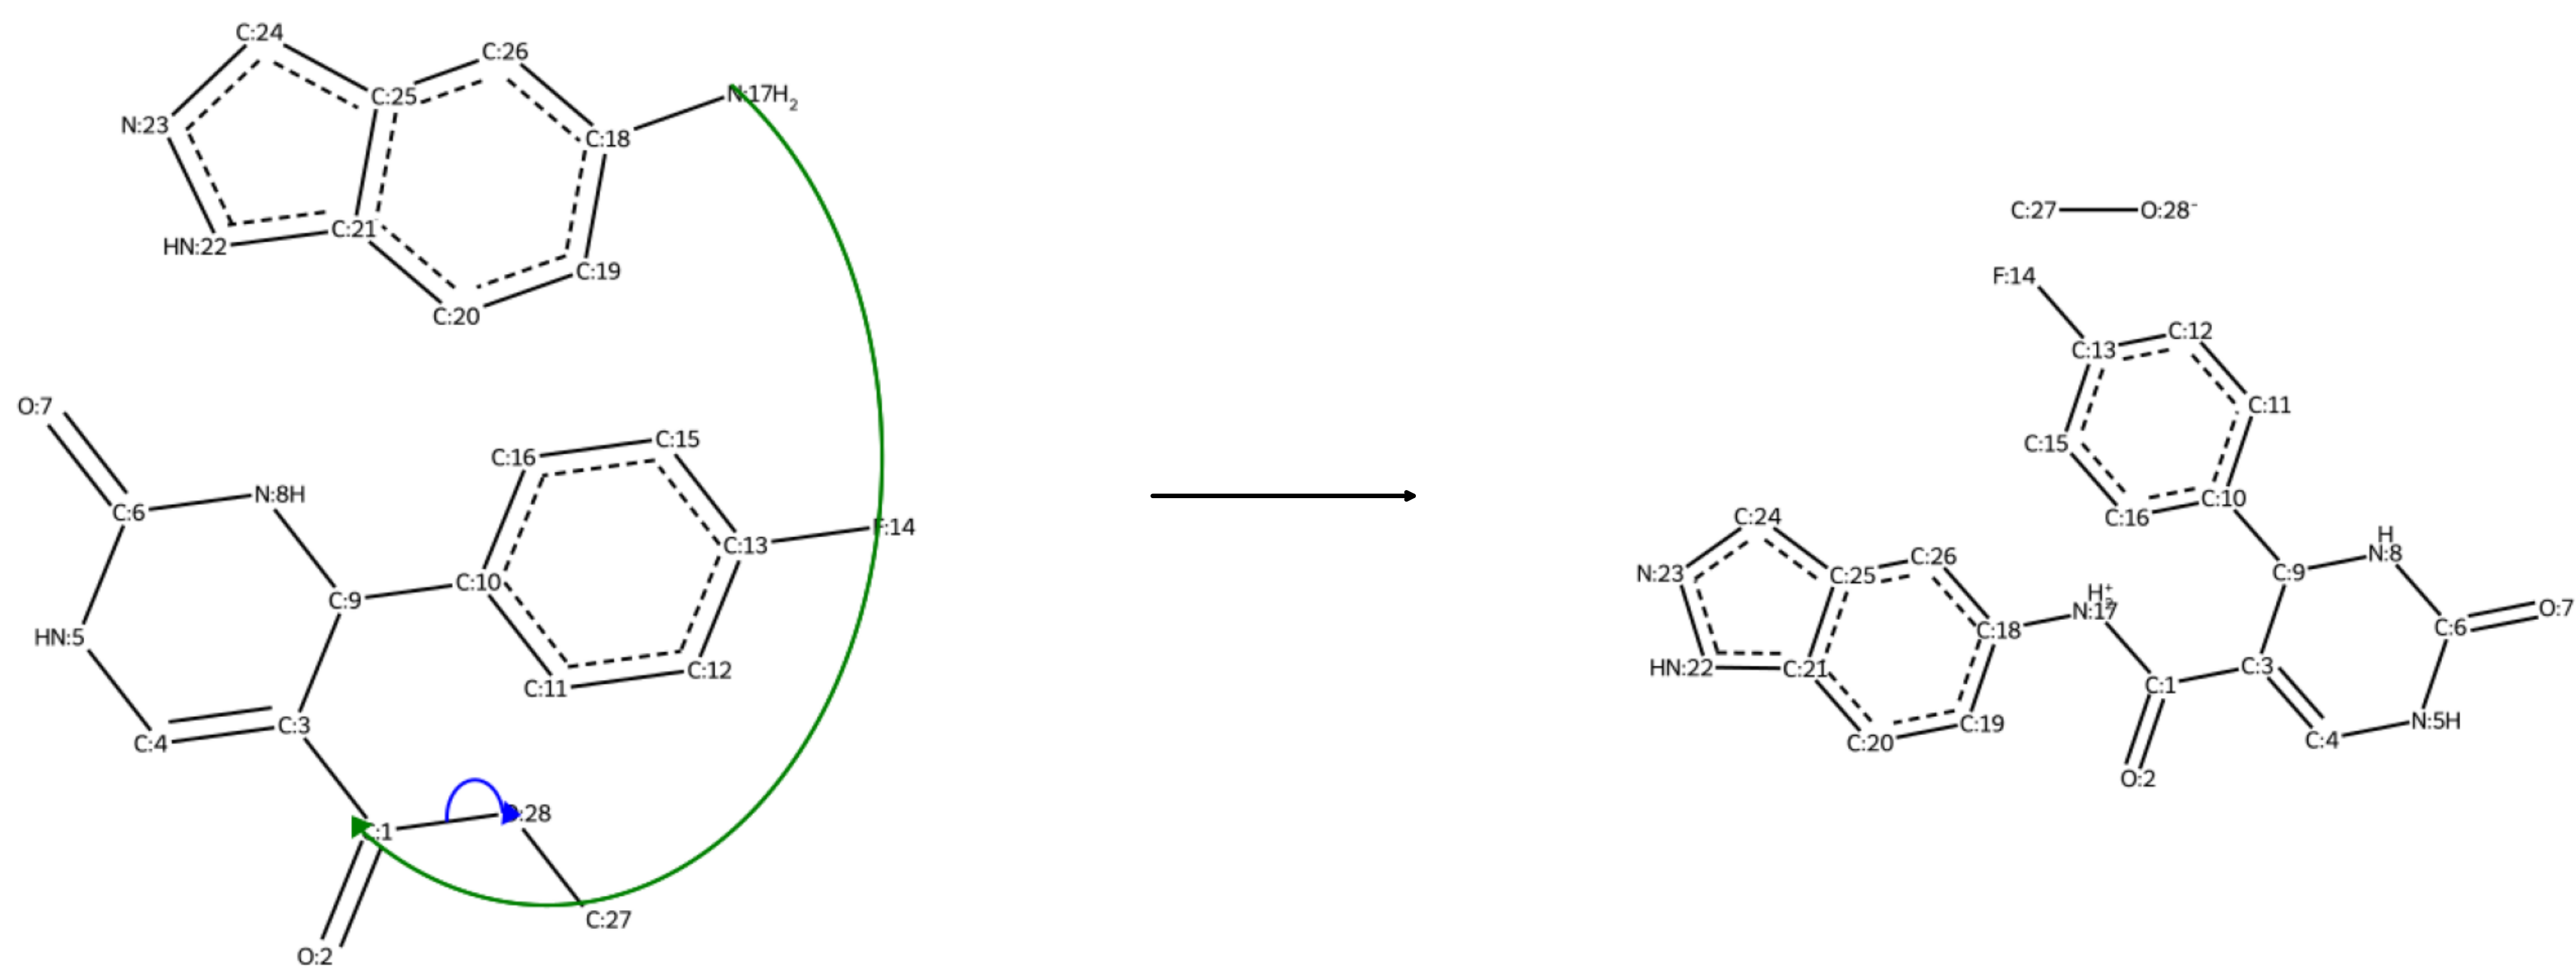

# Original reaction RXN\_ID:9

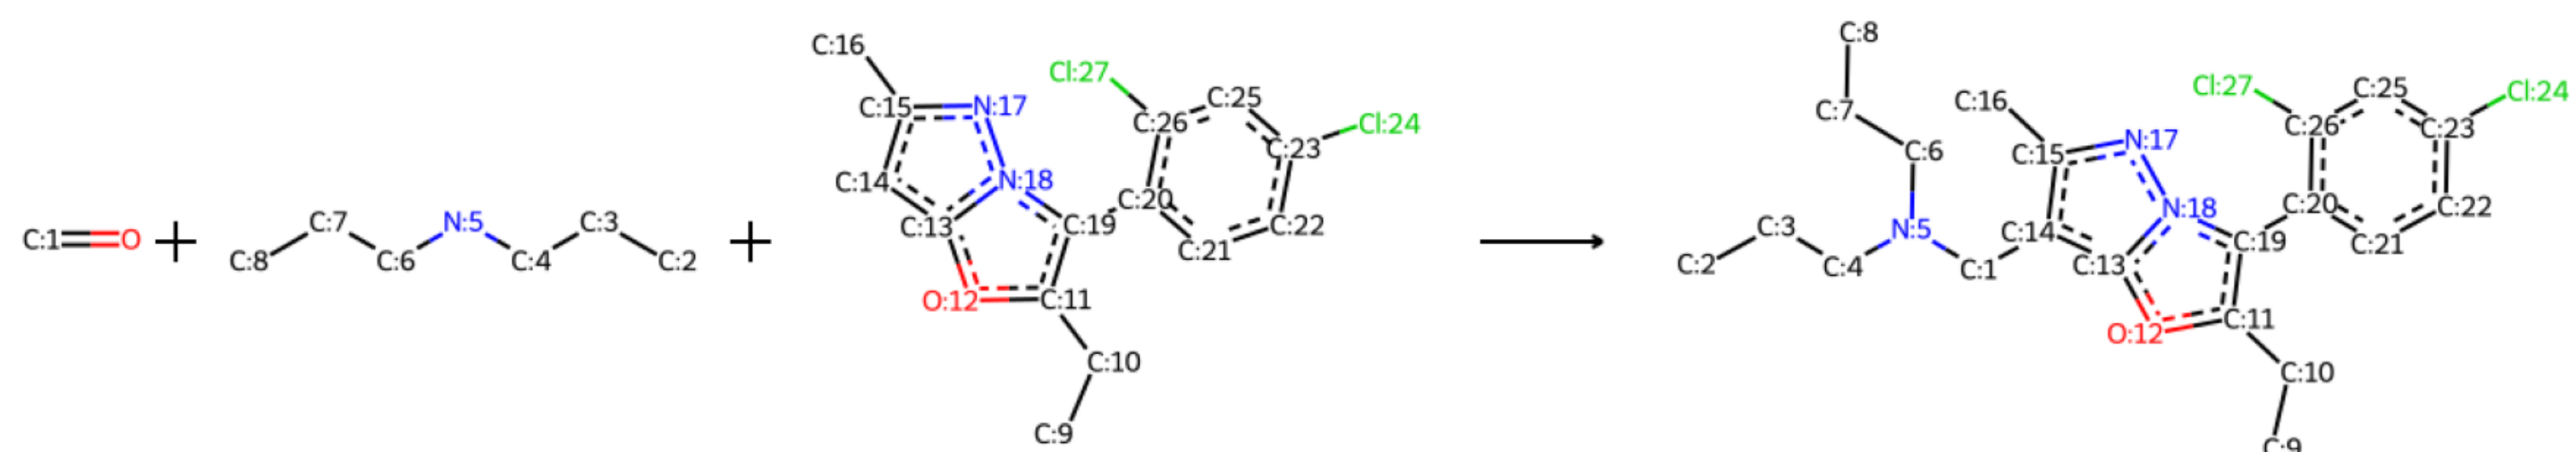

## ELECTRO-generated mechanistic pathway

[Arrow order: (1) green, (2) blue, (3) red, (4) orange]

step #1

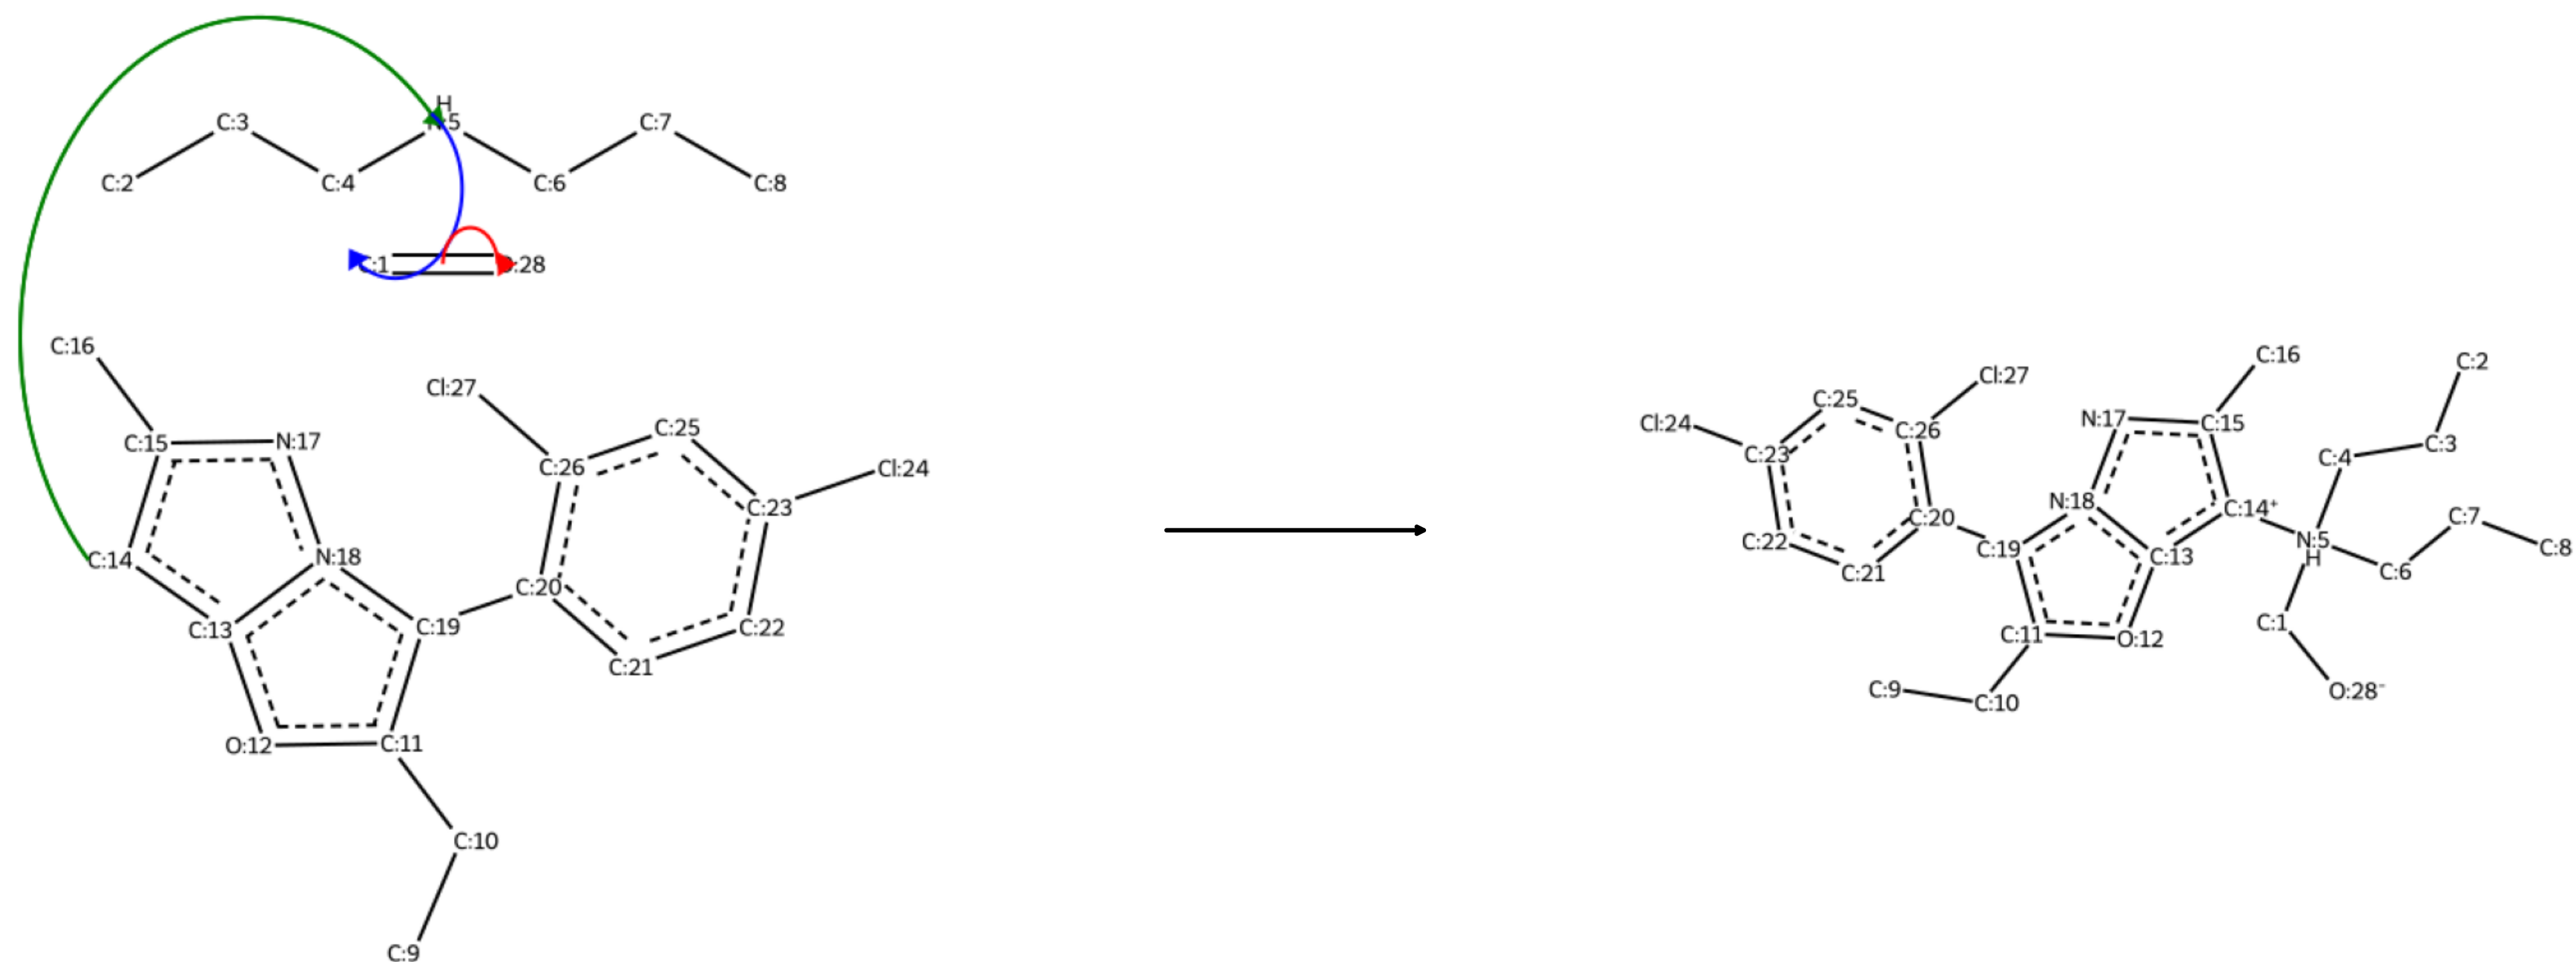

Product(s)



# Original reaction RXN\_ID:10

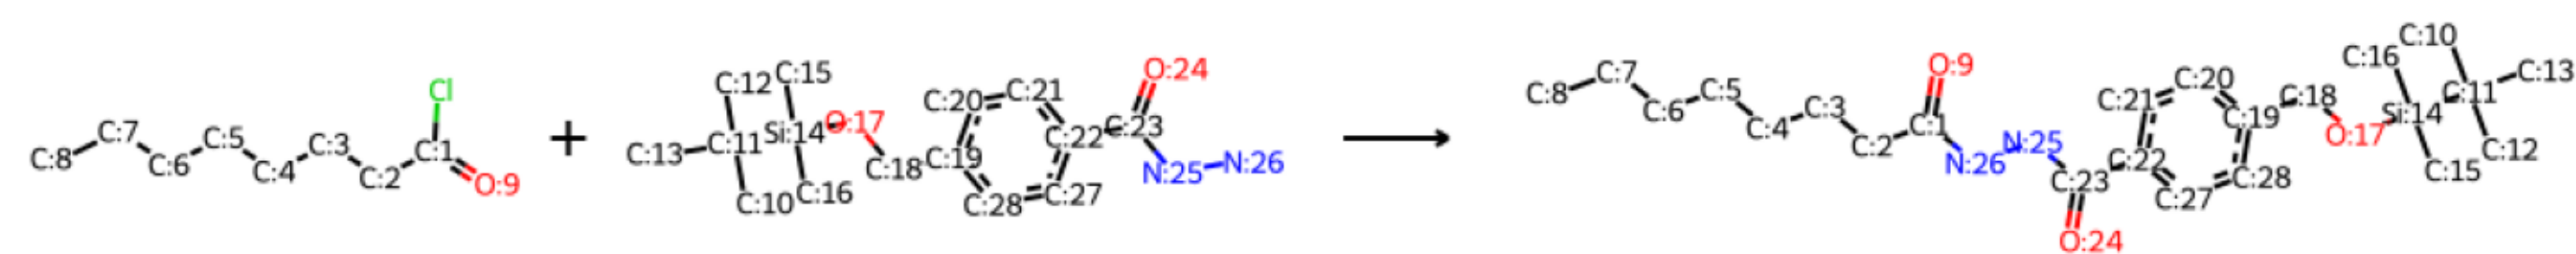

## ELECTRO-generated mechanistic pathway

[Arrow order: (1) green, (2) blue, (3) red, (4) orange]

step #1

Product(s)

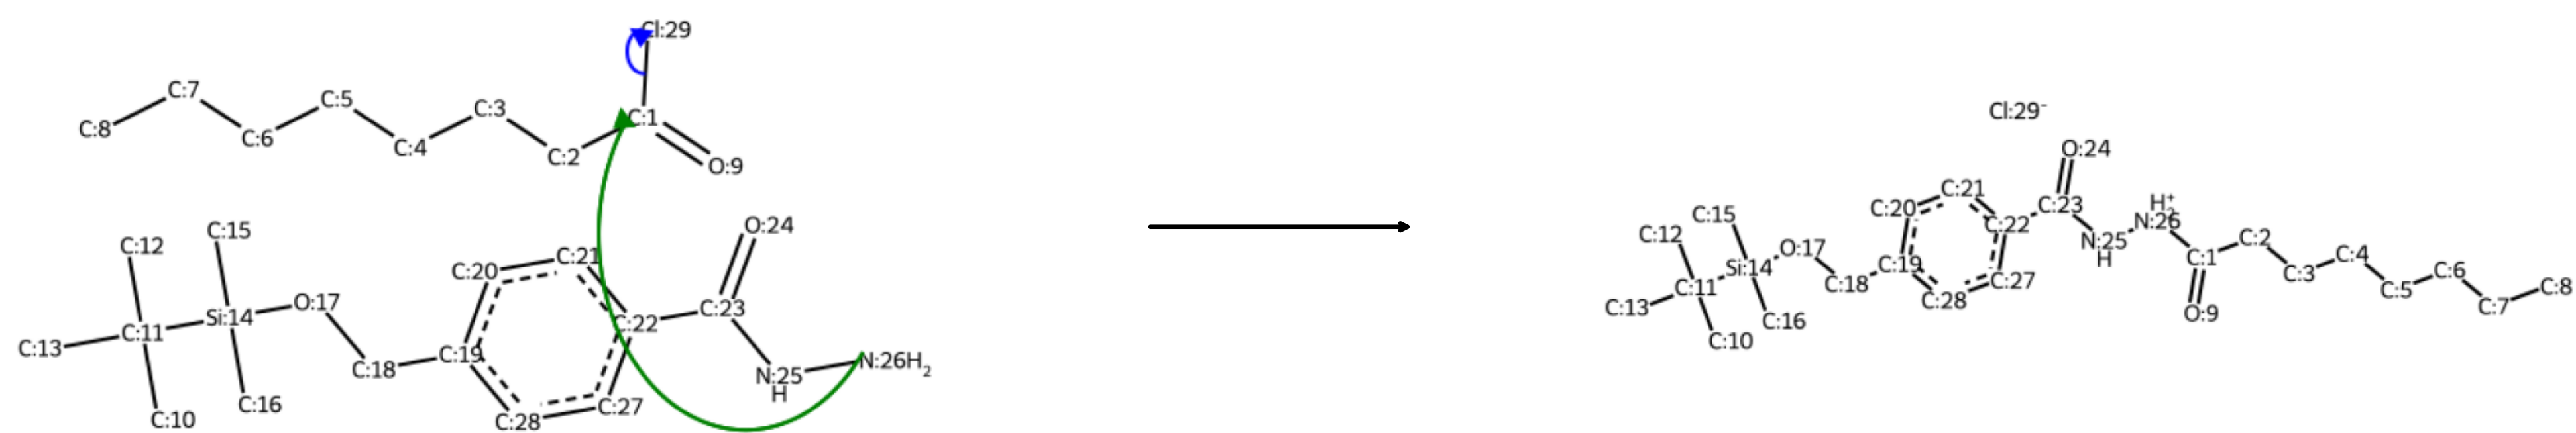

# Original reaction RXN\_ID:11

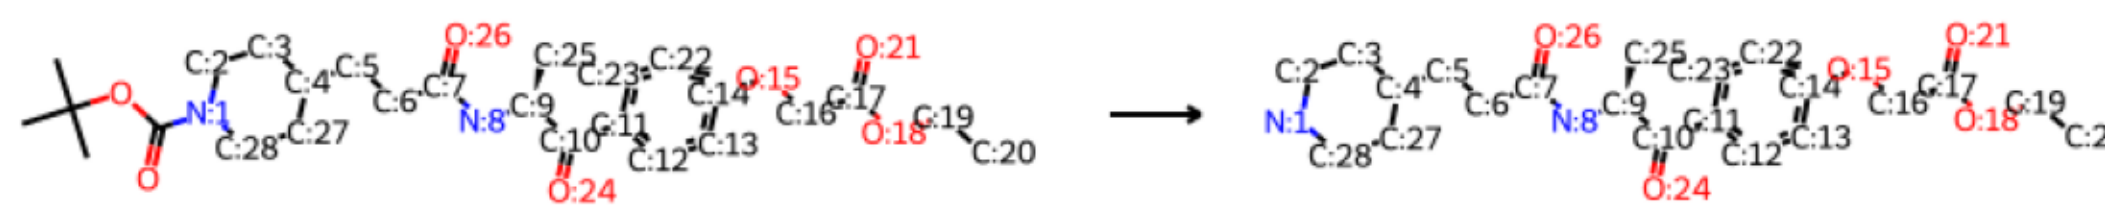

## ELECTRO-generated mechanistic pathway

[Arrow order: (1) green, (2) blue, (3) red, (4) orange]

step #1

Product(s)

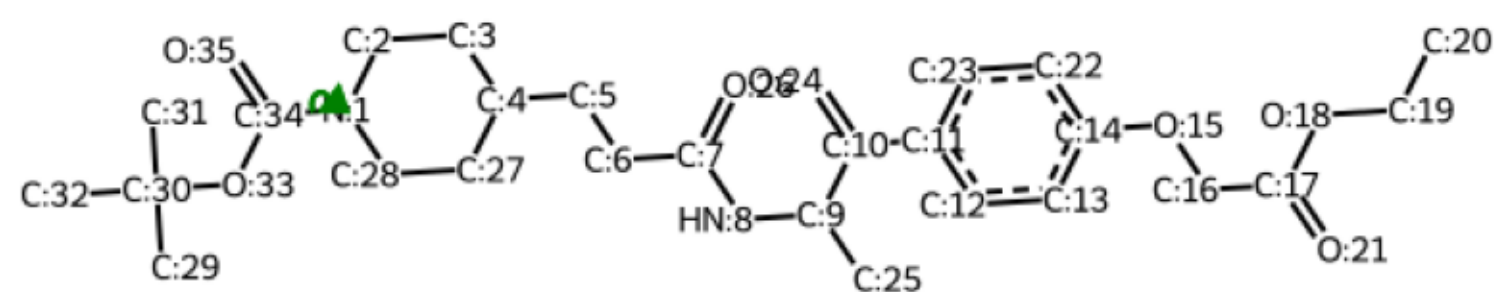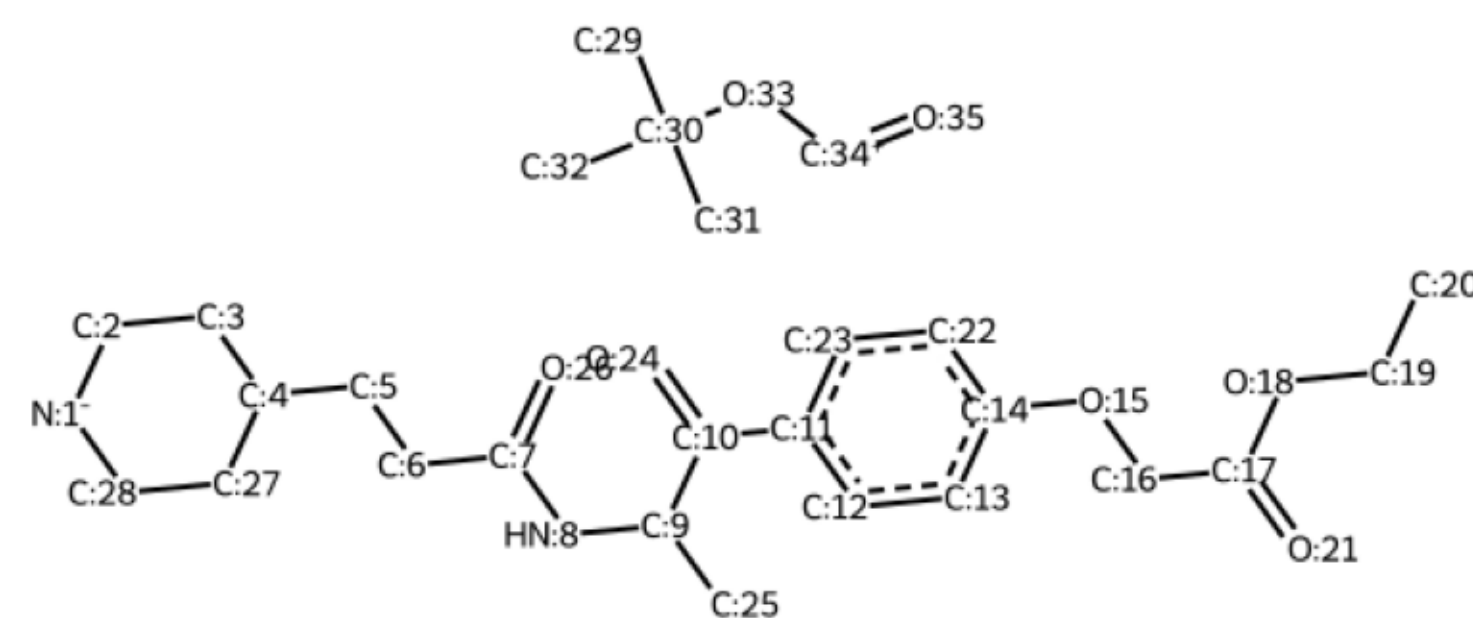



# Original reaction RXN\_ID:12

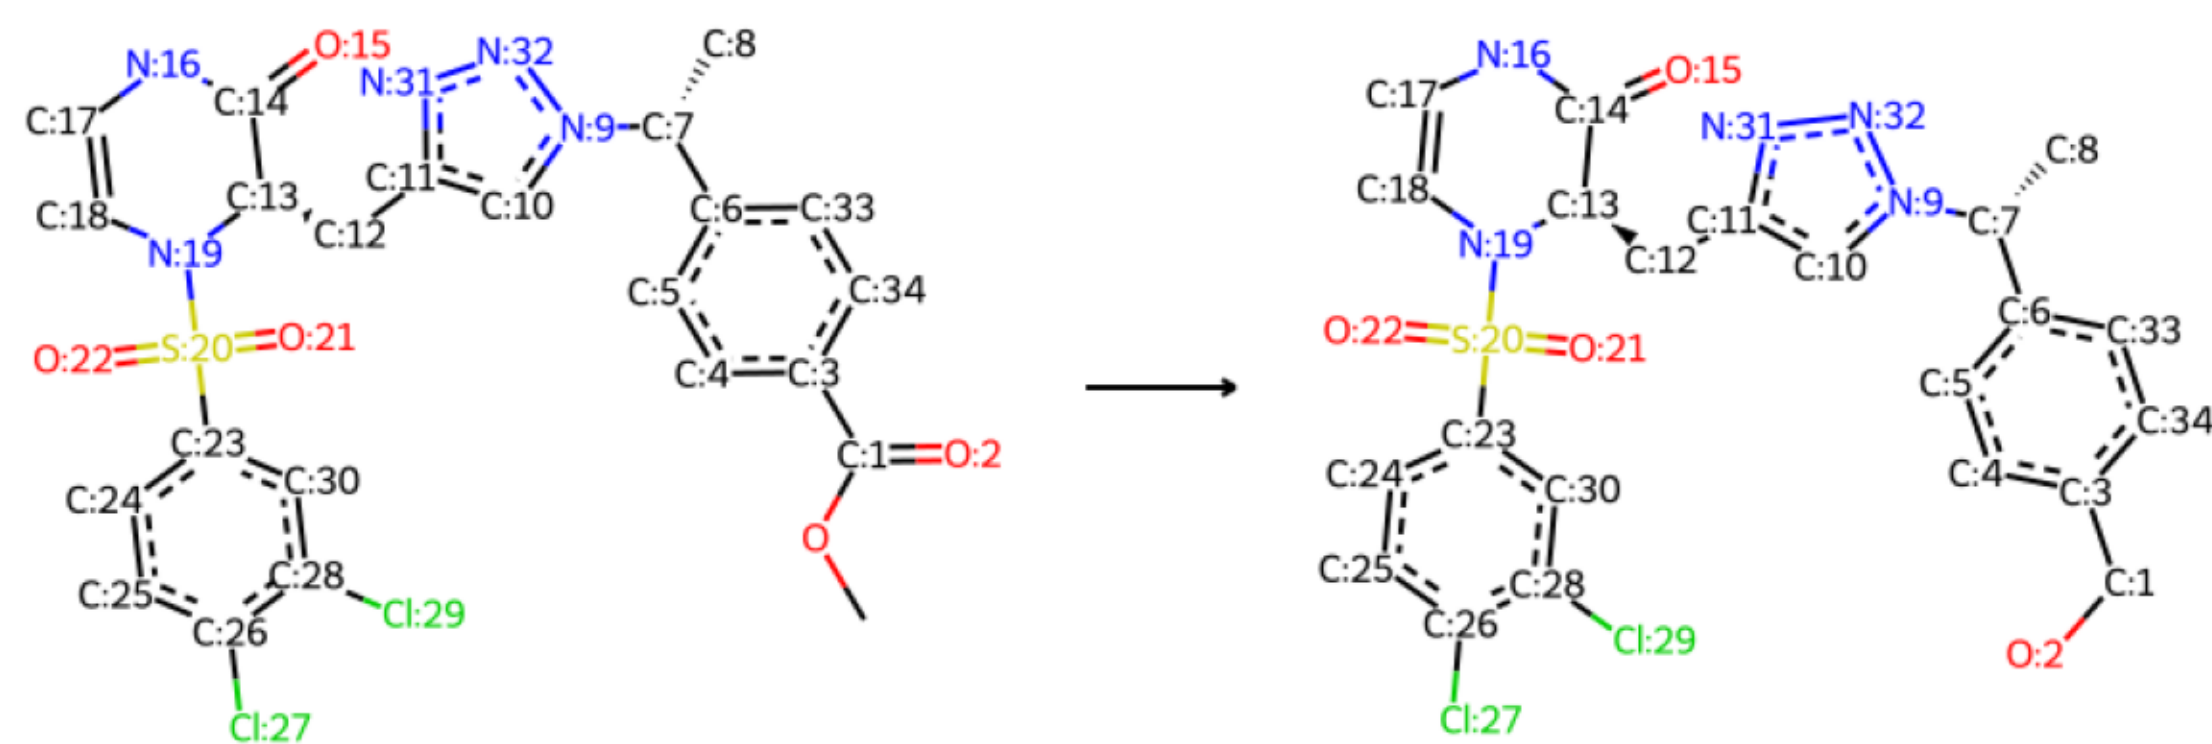

## ELECTRO-generated mechanistic pathway

[Arrow order: (1) green, (2) blue, (3) red, (4) orange]

step #1

Product(s)

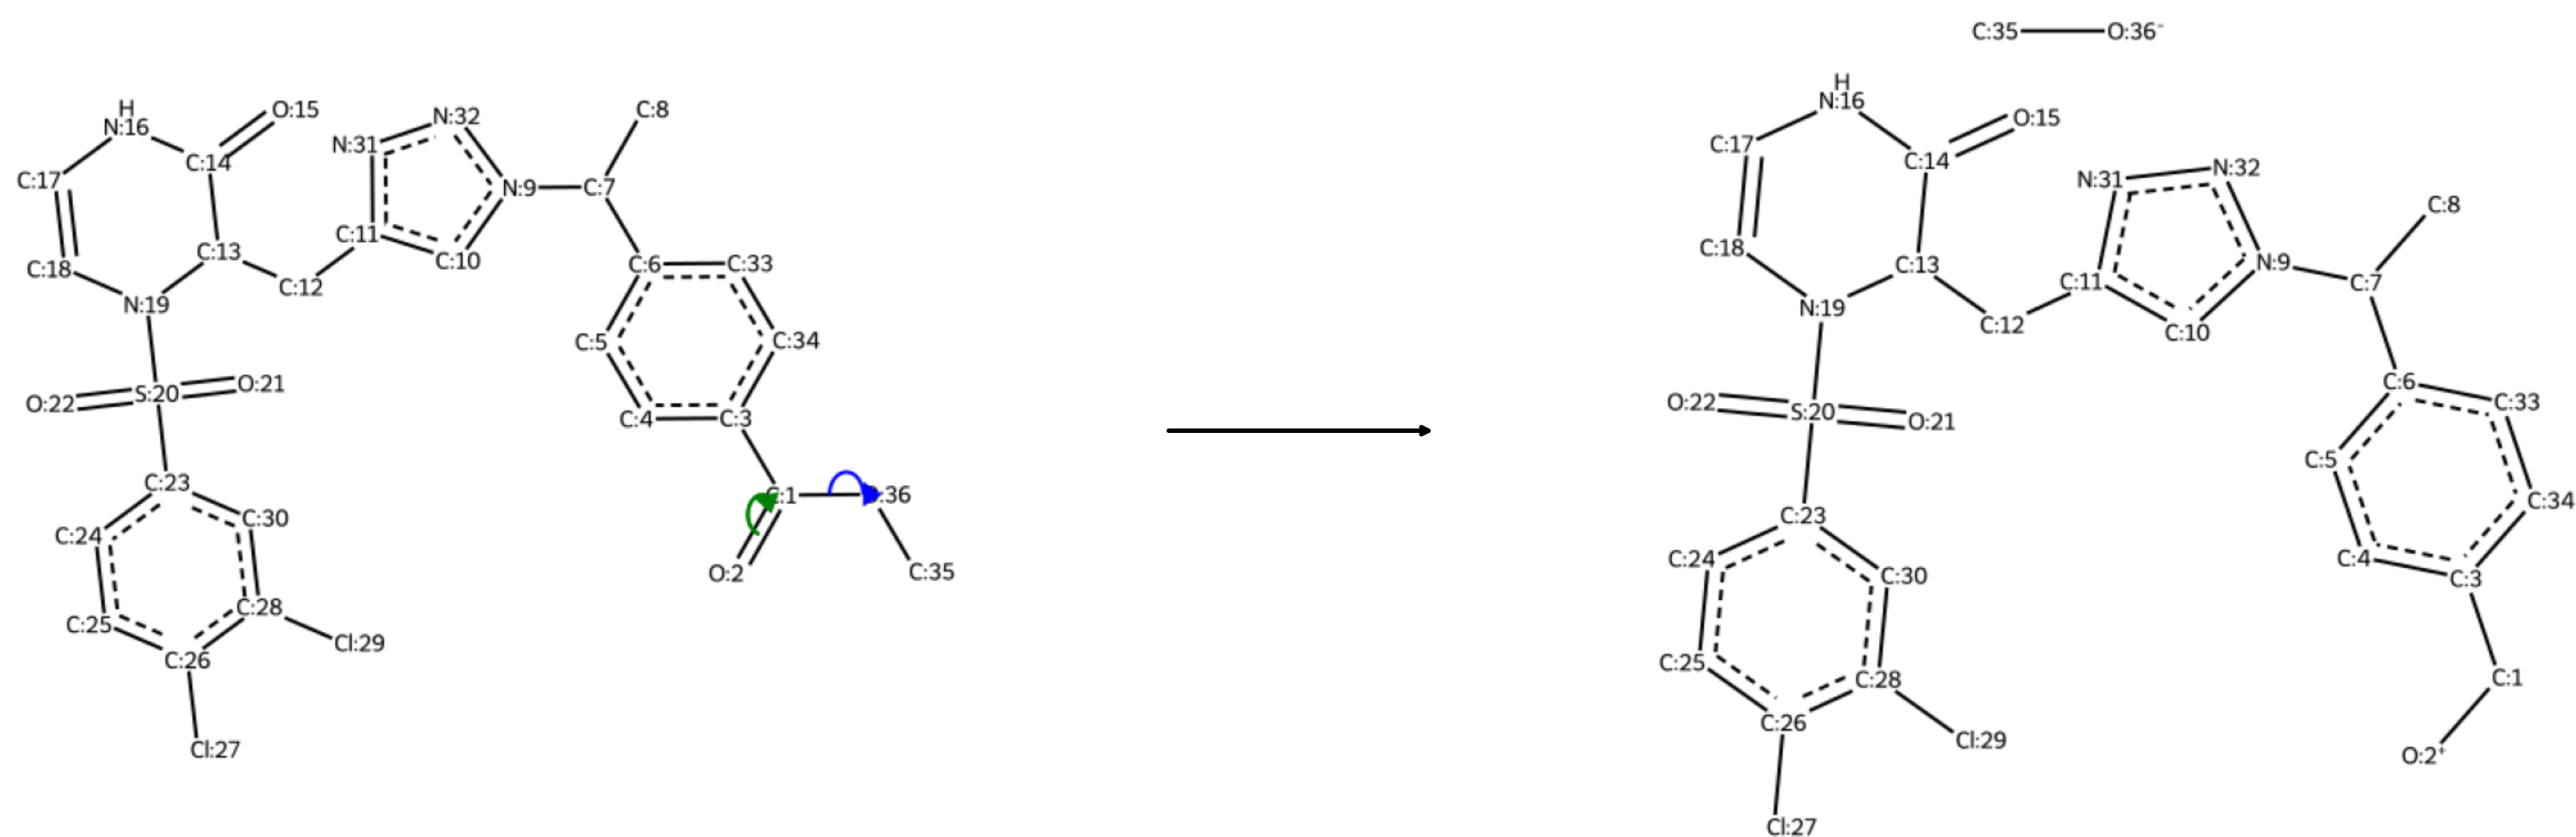

# Original reaction RXN\_ID:13

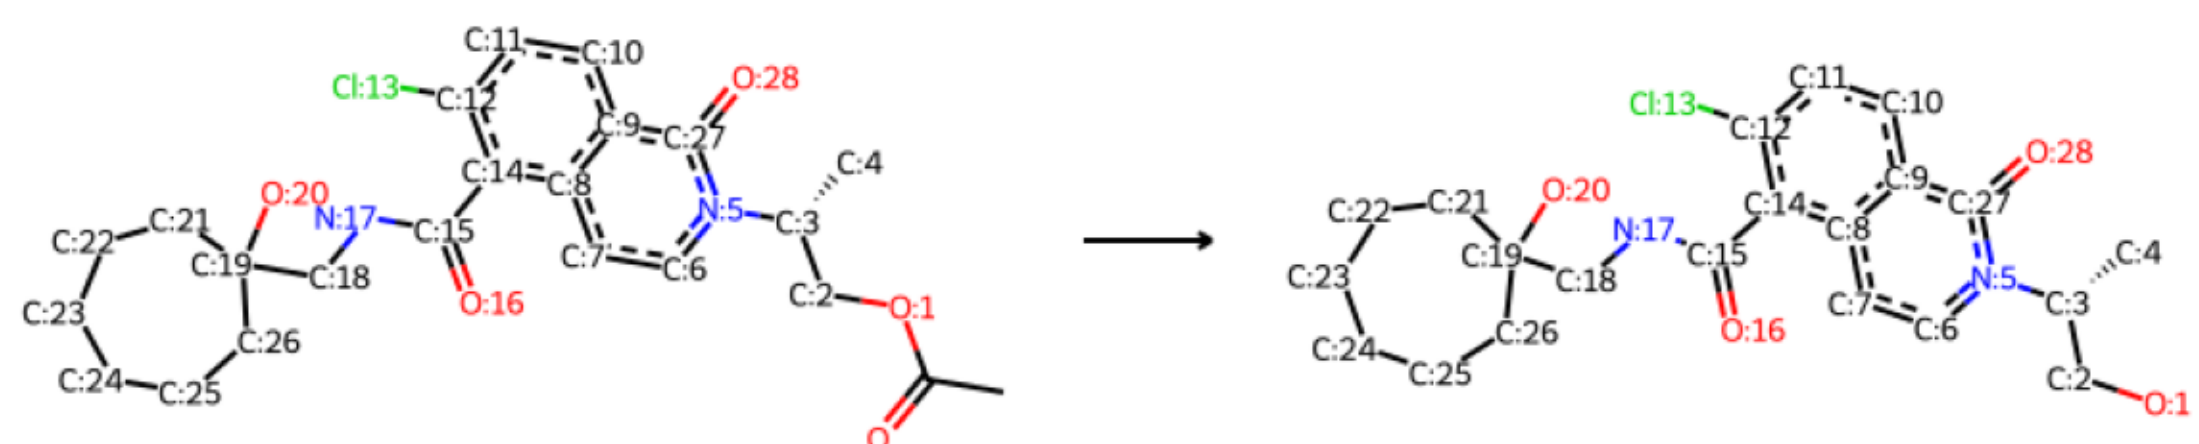

## ELECTRO-generated mechanistic pathway

[Arrow order: (1) green, (2) blue, (3) red, (4) orange]

step #1

Product(s)

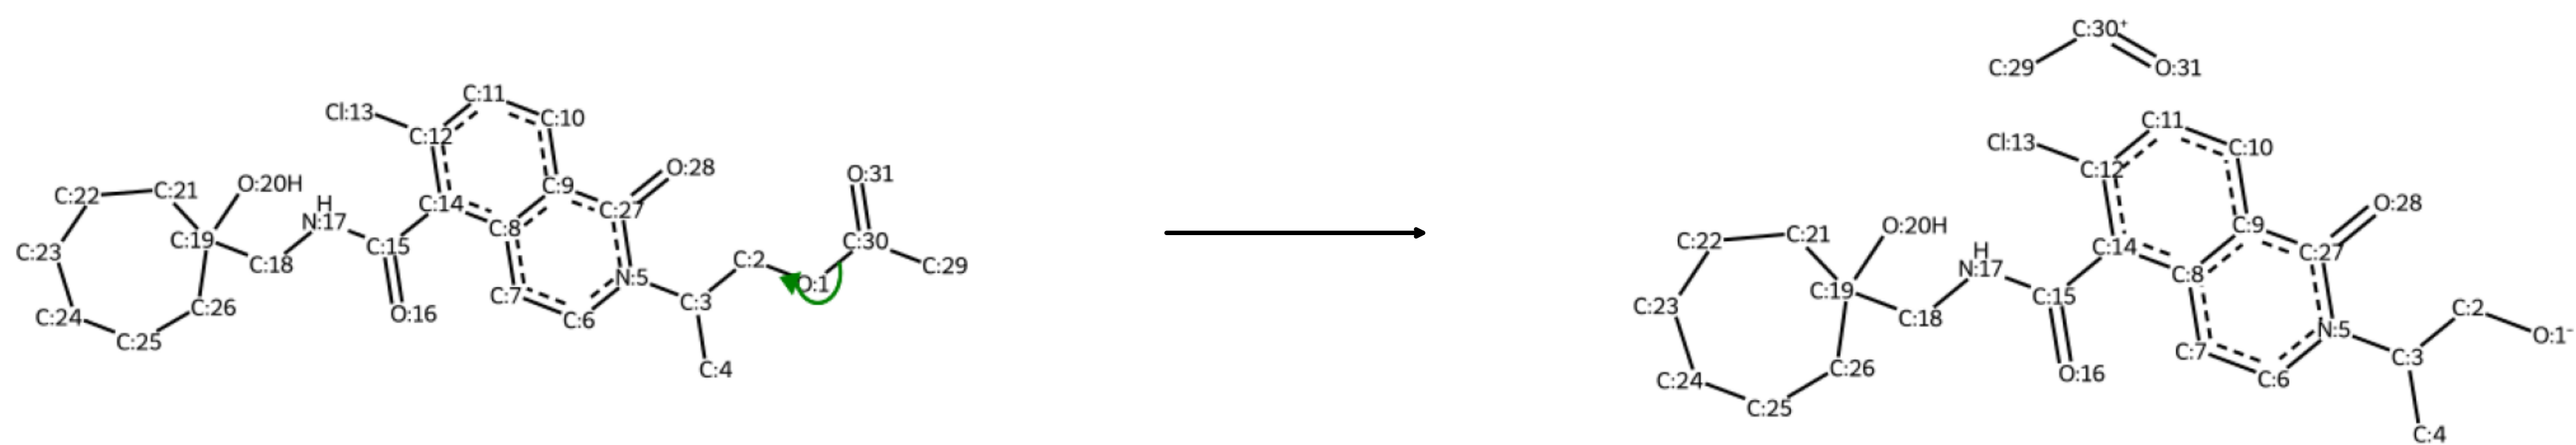



# Original reaction RXN\_ID:14

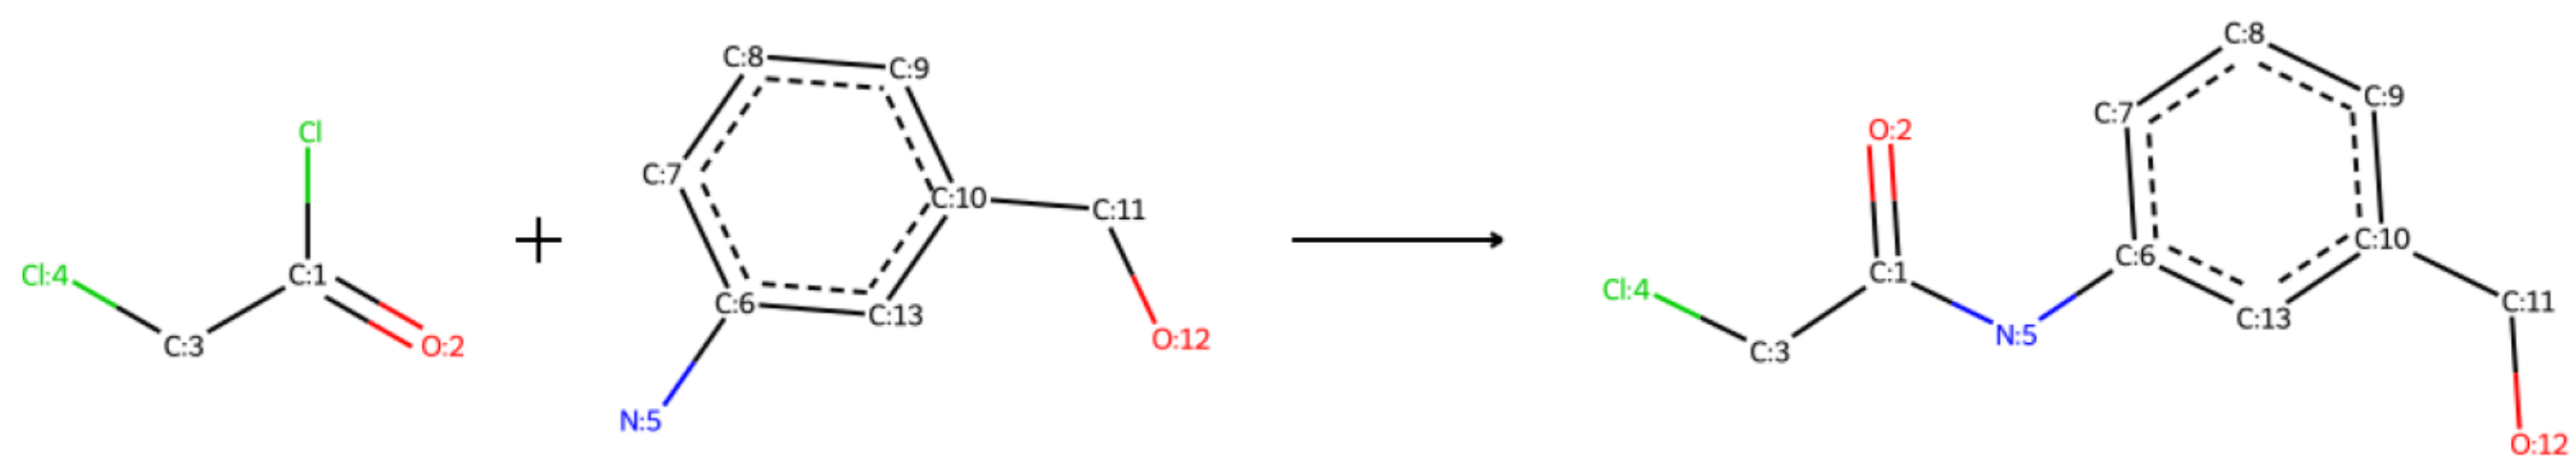

## ELECTRO-generated mechanistic pathway

[Arrow order: (1) green, (2) blue, (3) red, (4) orange]

step #1

Product(s)

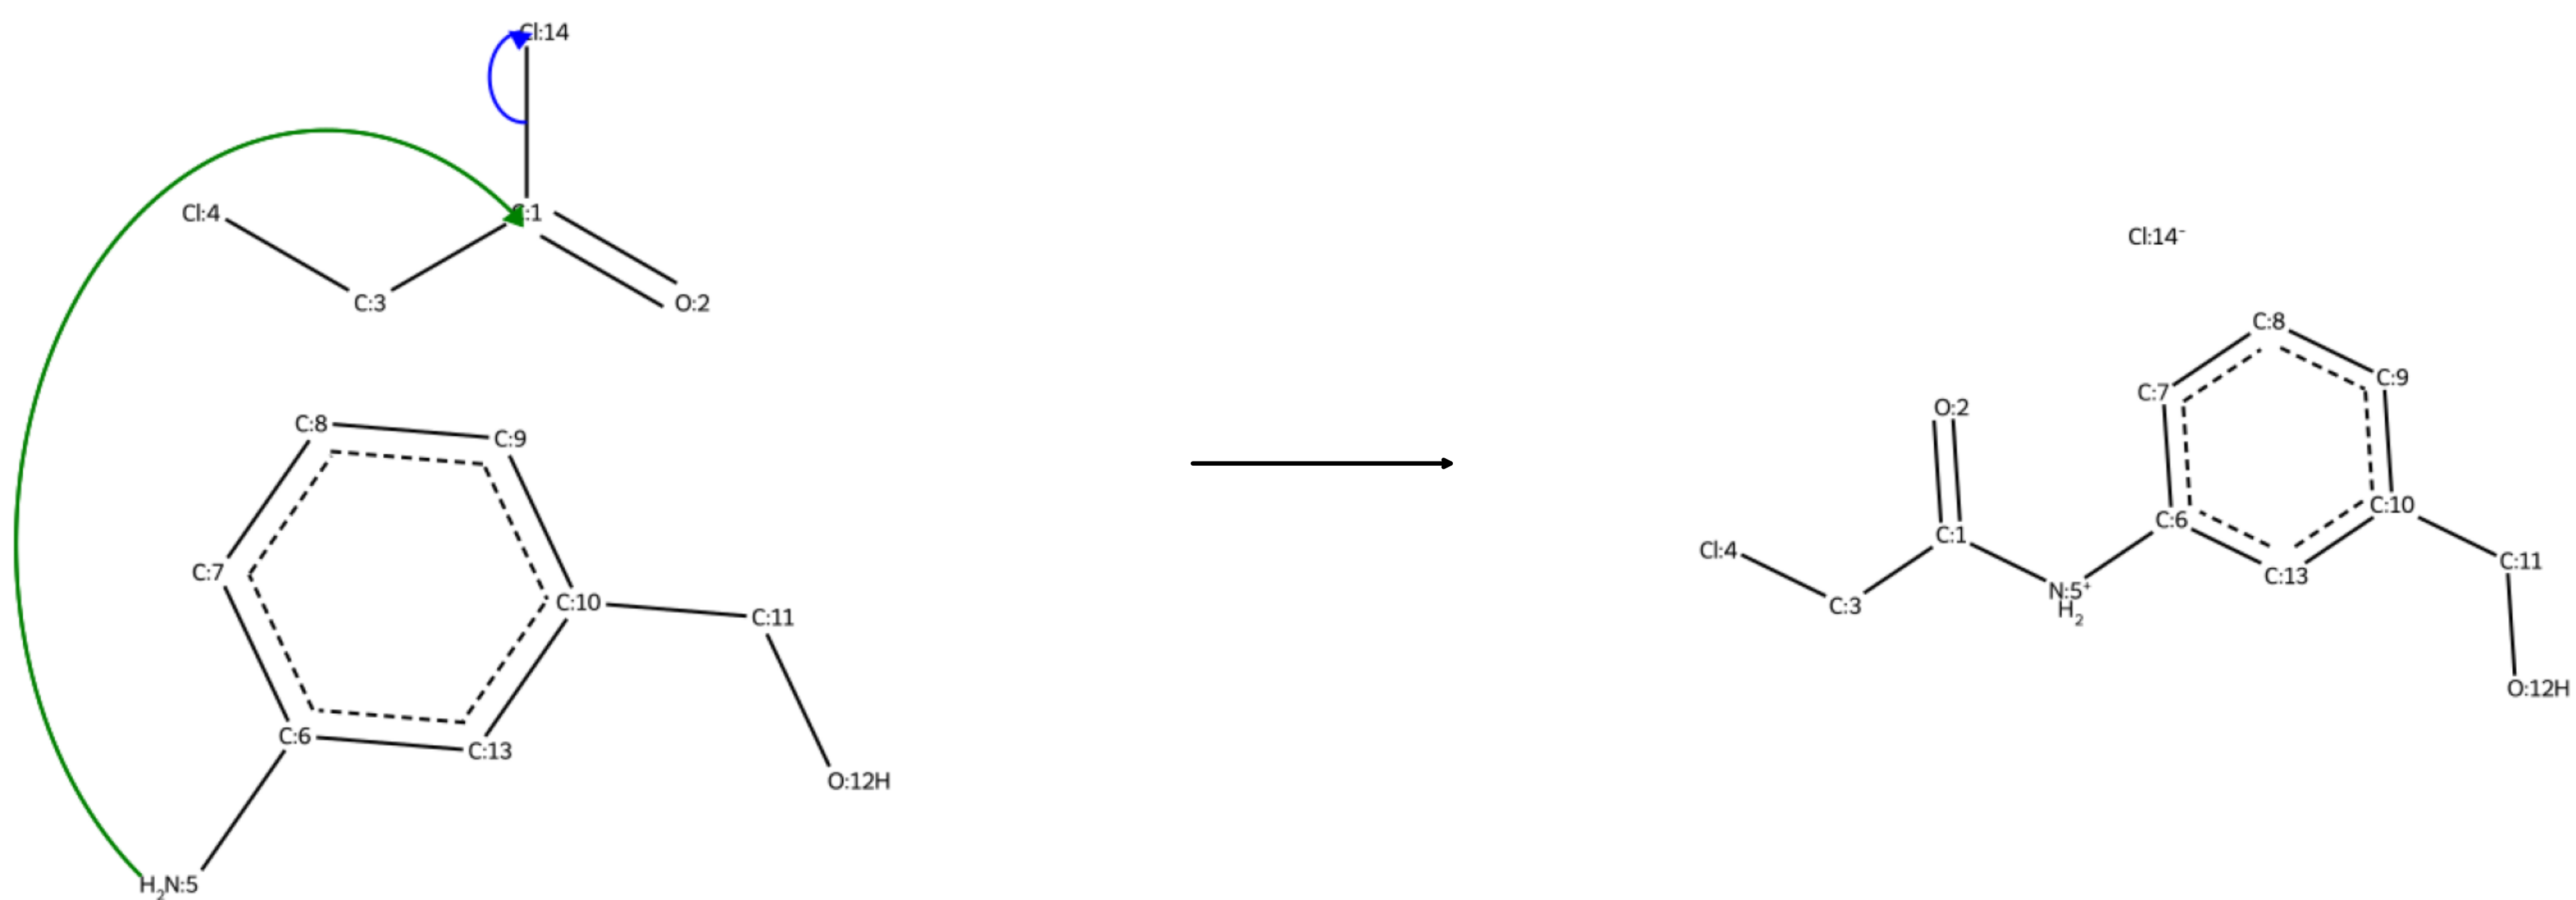

# Original reaction RXN\_ID:15

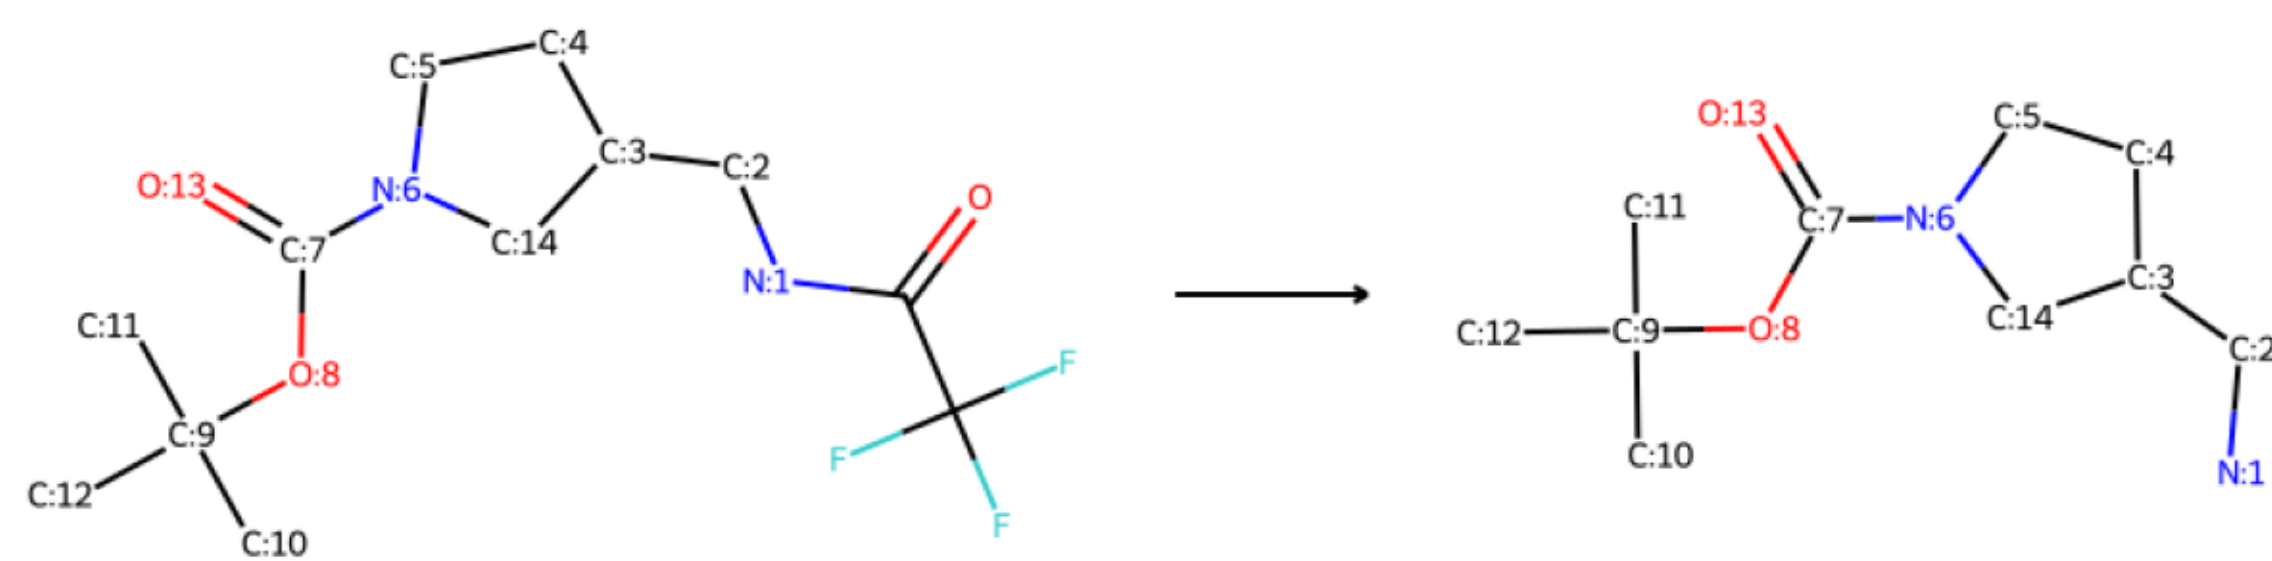

## ELECTRO-generated mechanistic pathway

[Arrow order: (1) green, (2) blue, (3) red, (4) orange]

step #1

Product(s)

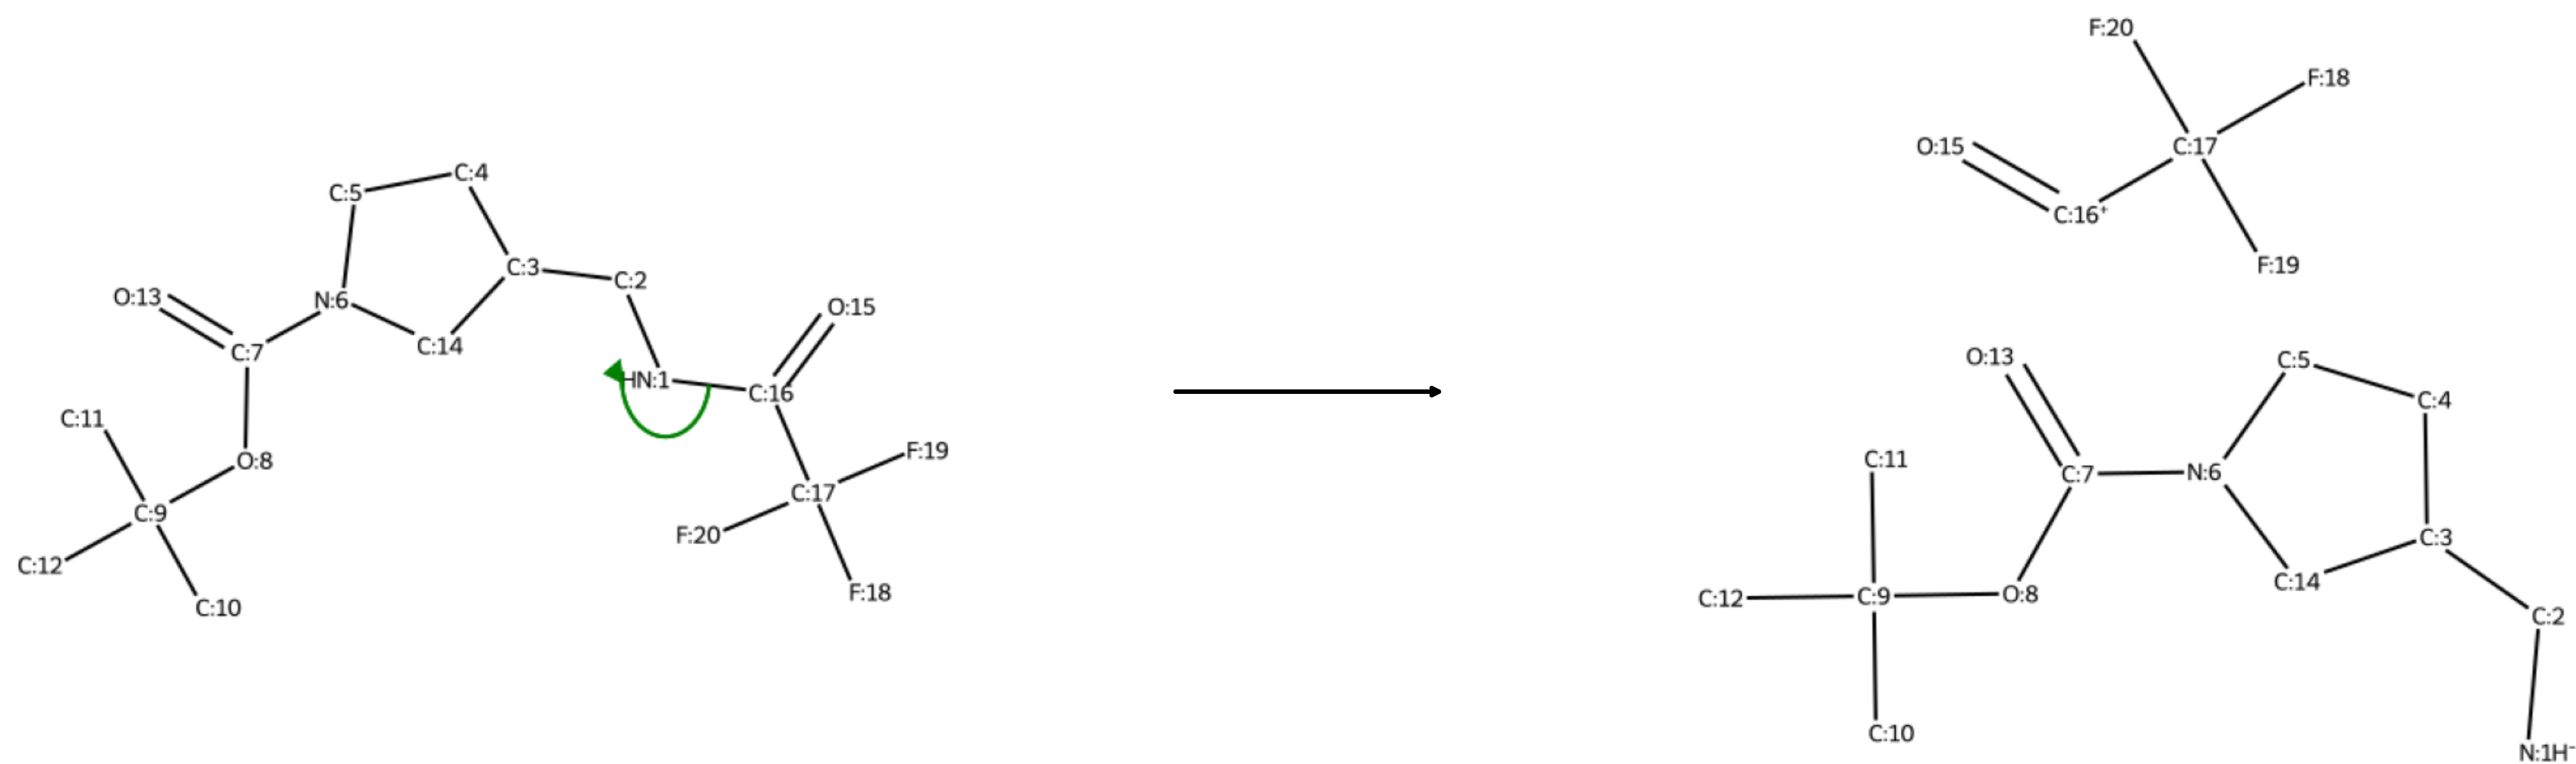



# Original reaction RXN\_ID:16

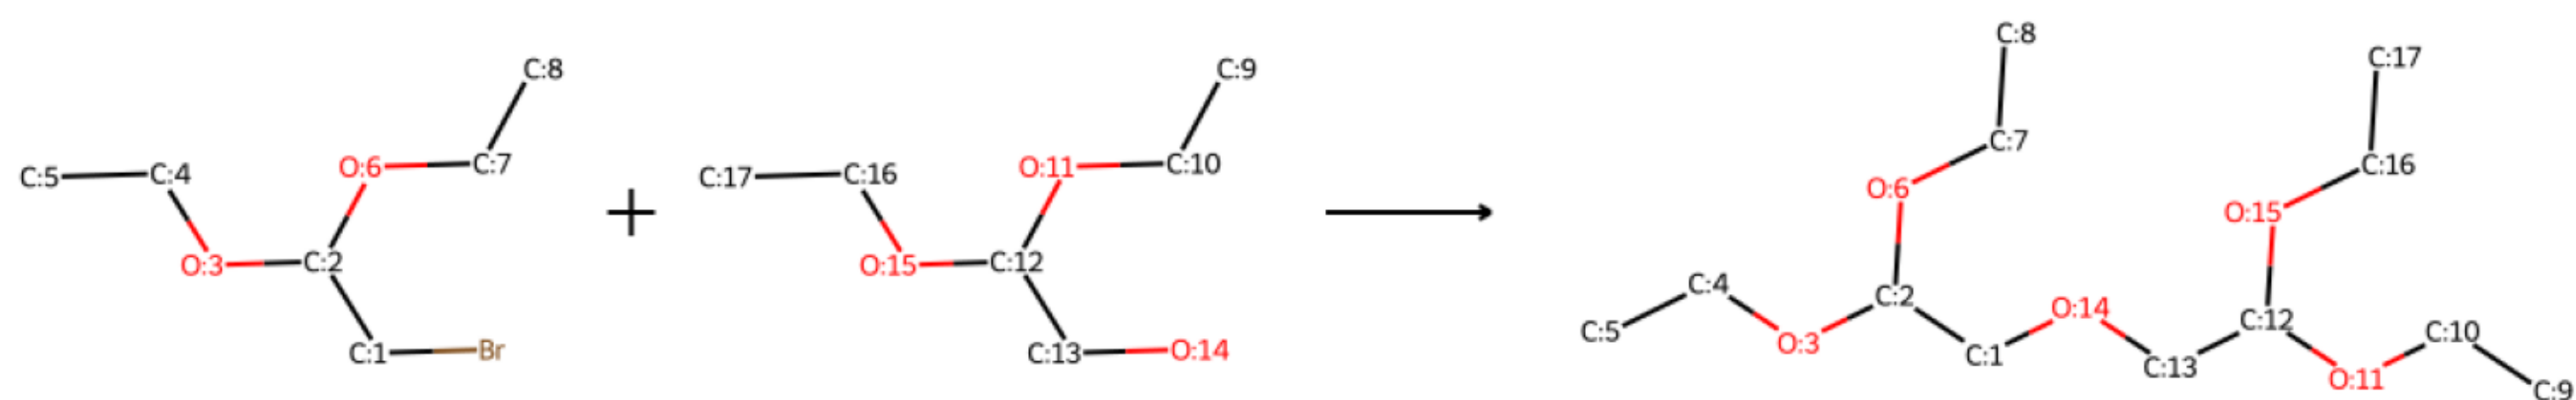

## ELECTRO-generated mechanistic pathway

[Arrow order: (1) green, (2) blue, (3) red, (4) orange]

step #1

Product(s)

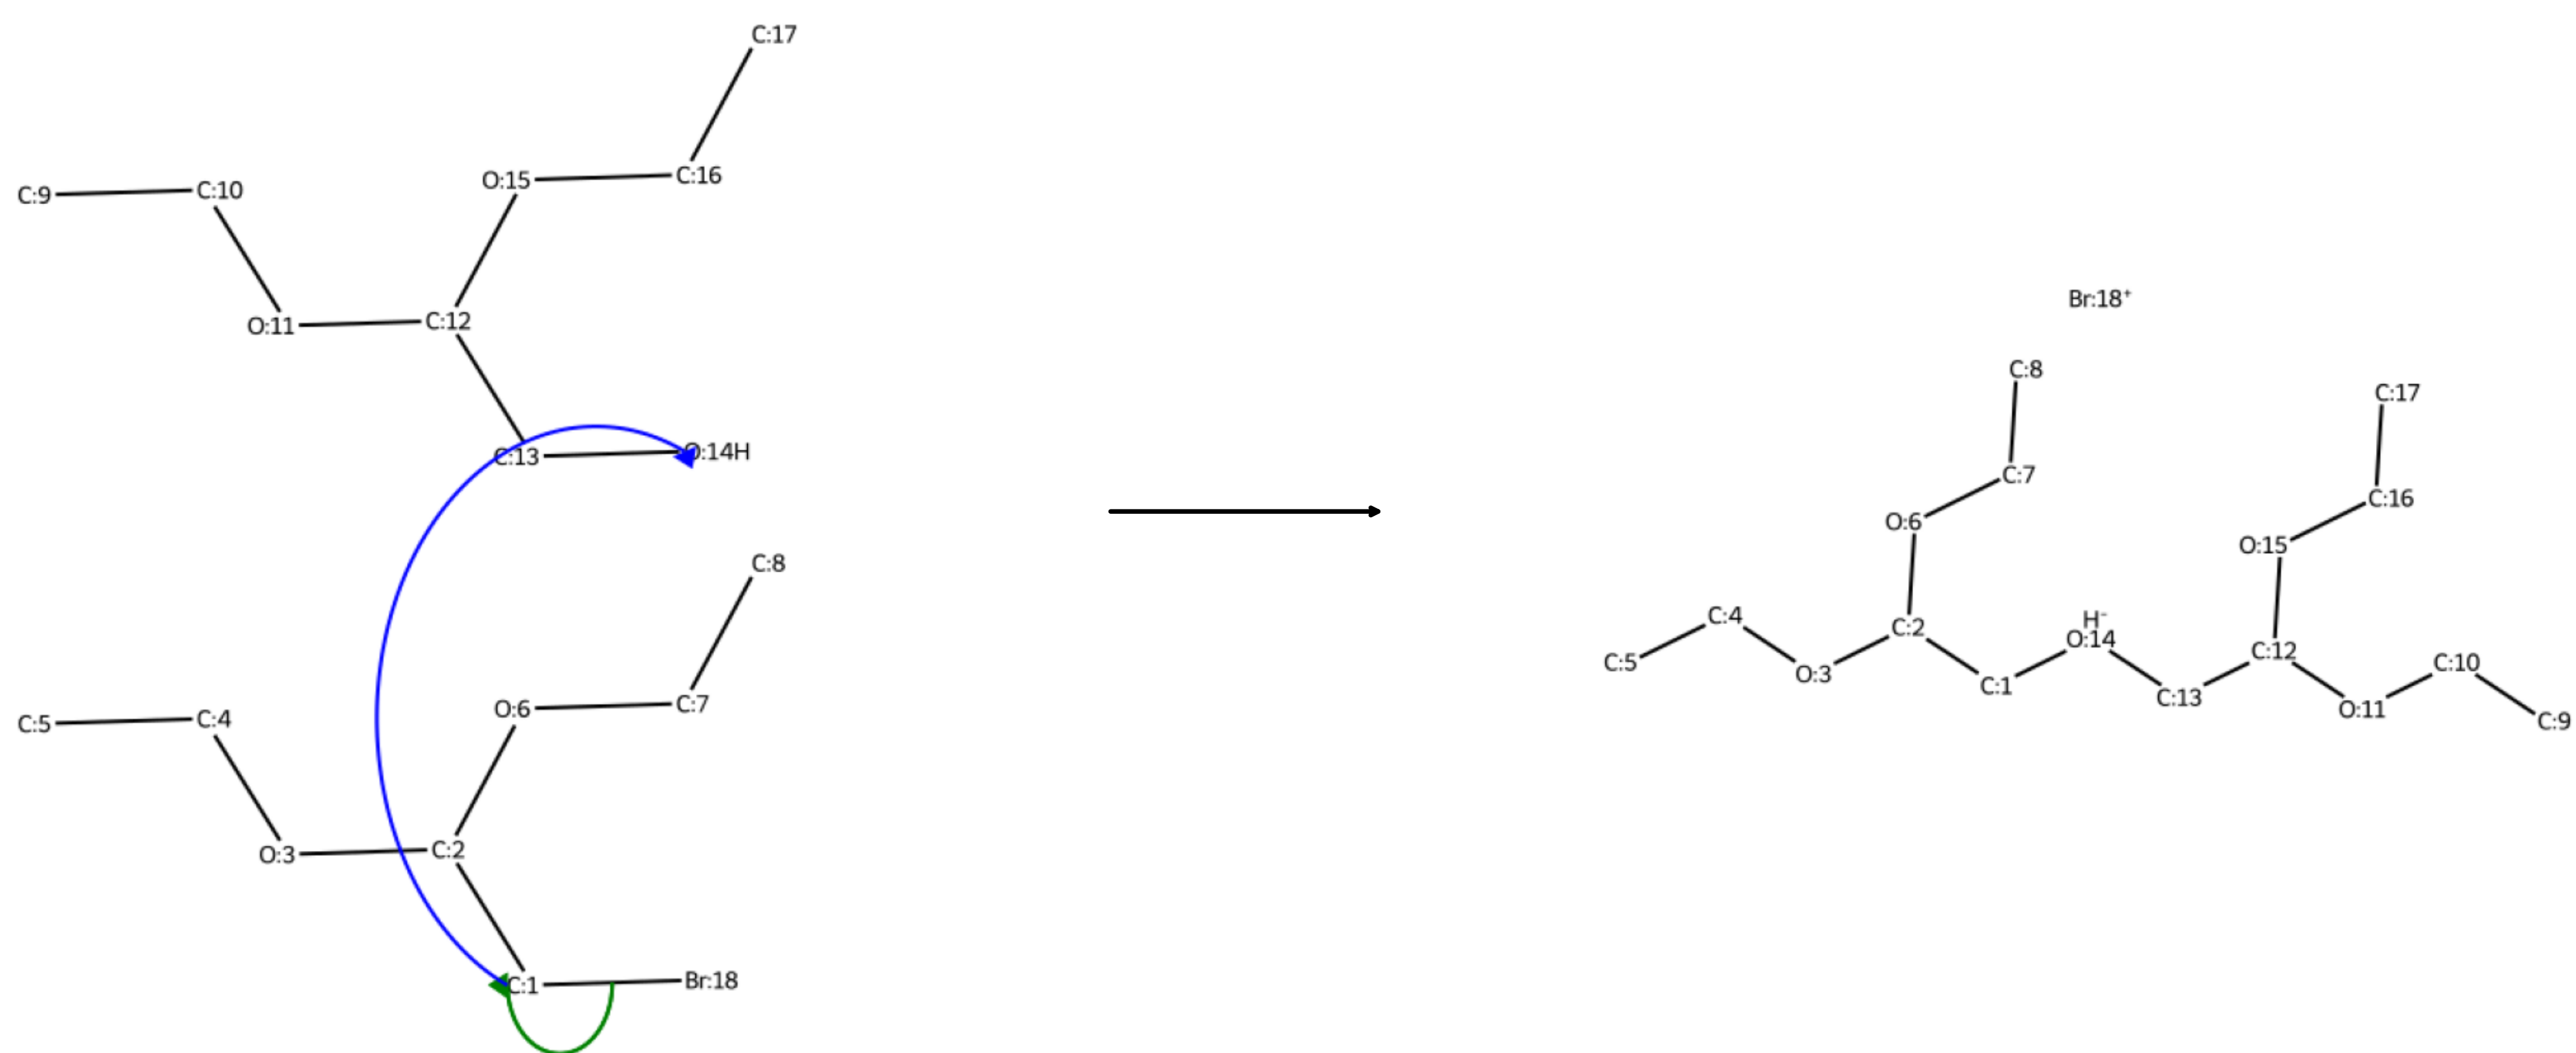

# Original reaction RXN\_ID:17

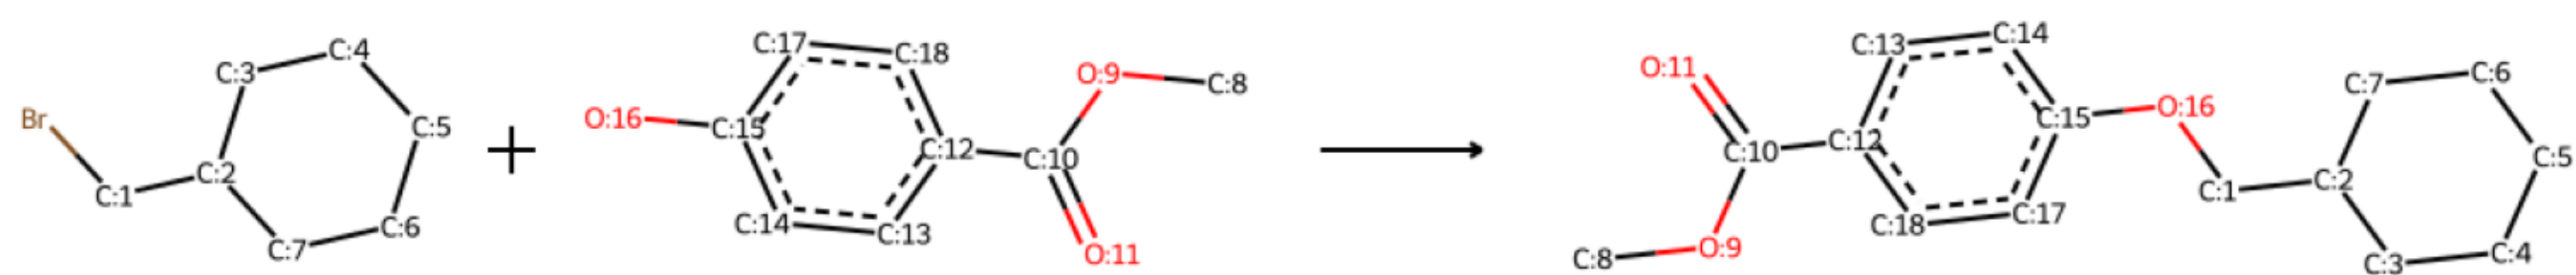

## ELECTRO-generated mechanistic pathway

[Arrow order: (1) green, (2) blue, (3) red, (4) orange]

step #1

Product(s)

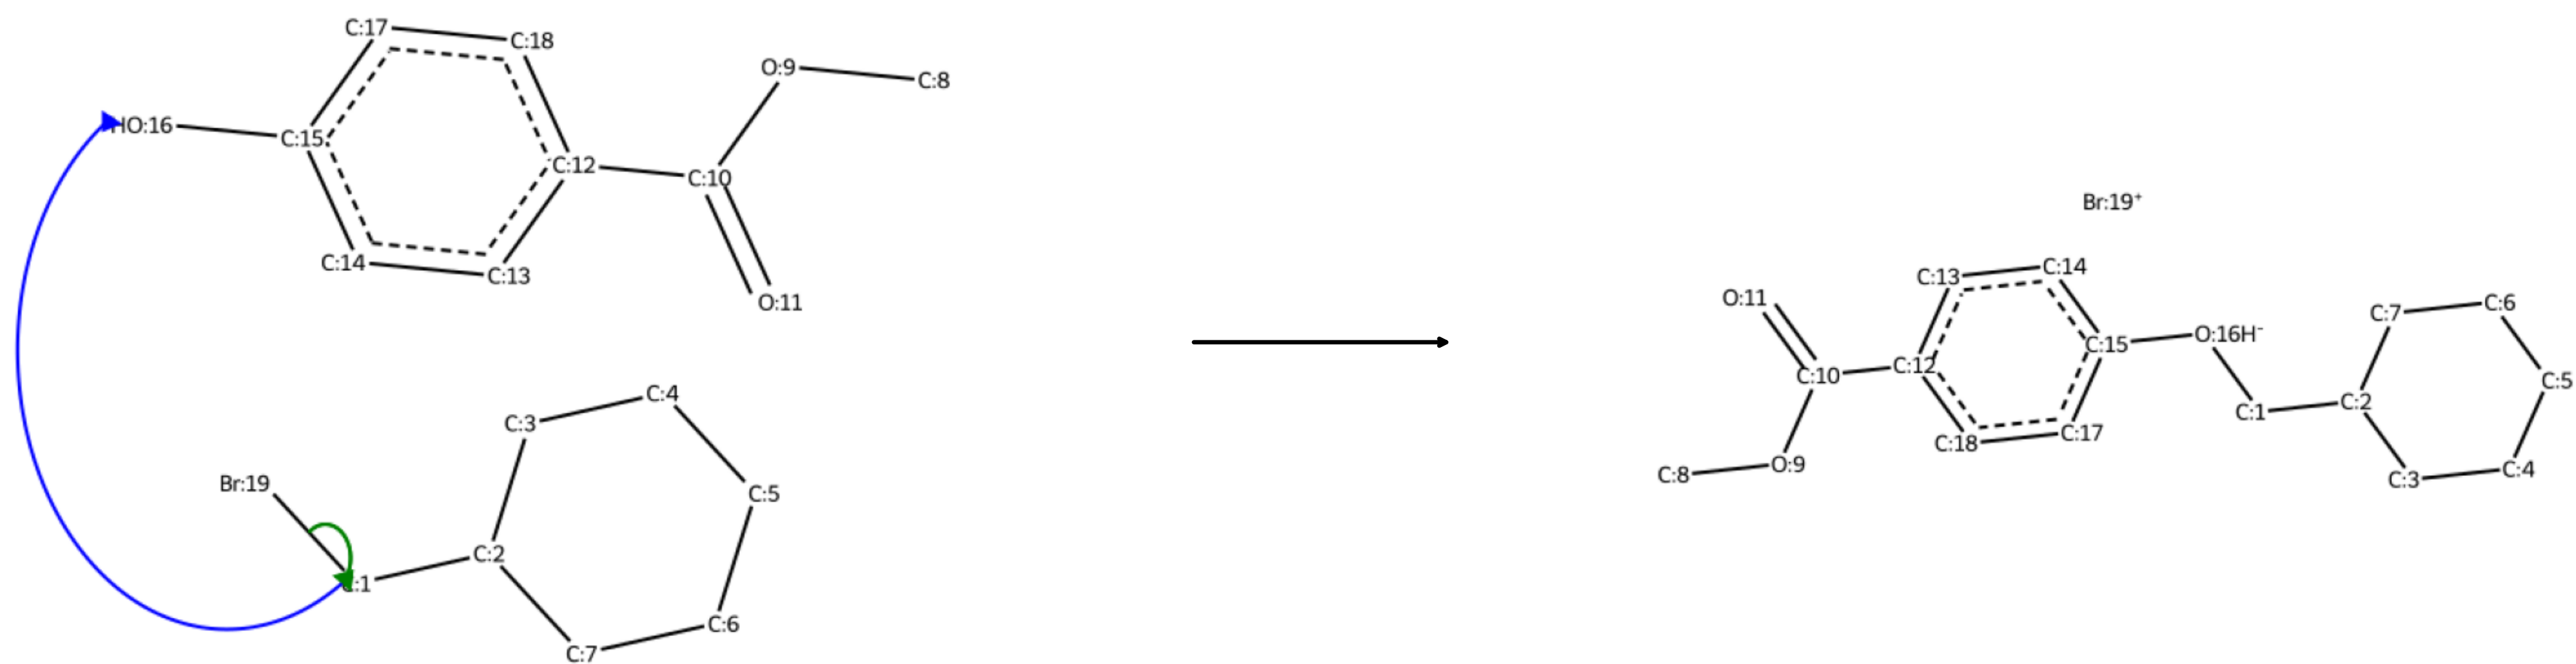



# Original reaction RXN\_ID:18

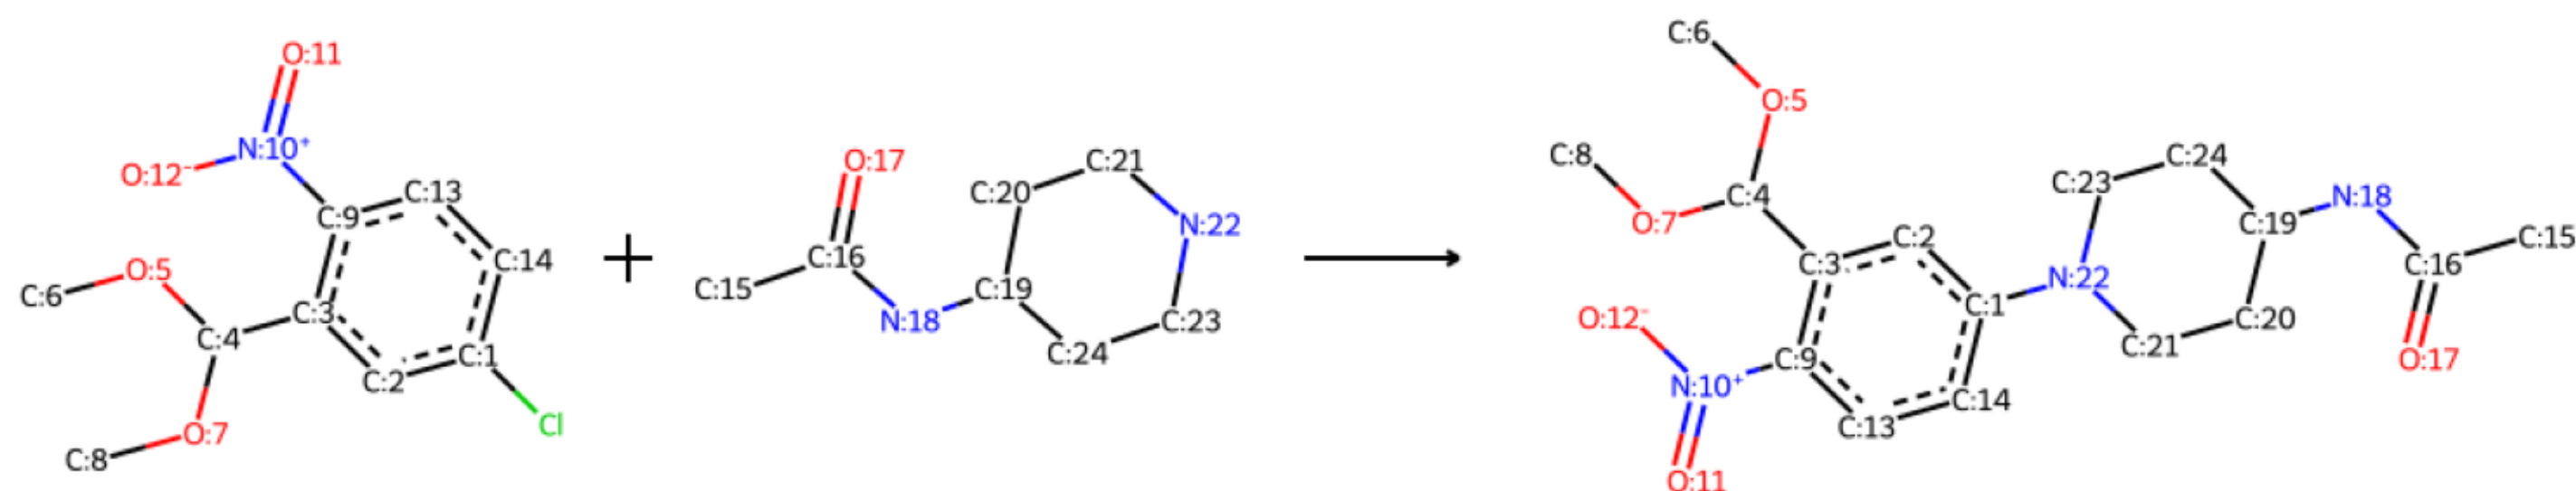

## ELECTRO-generated mechanistic pathway

[Arrow order: (1) green, (2) blue, (3) red, (4) orange]

step #1

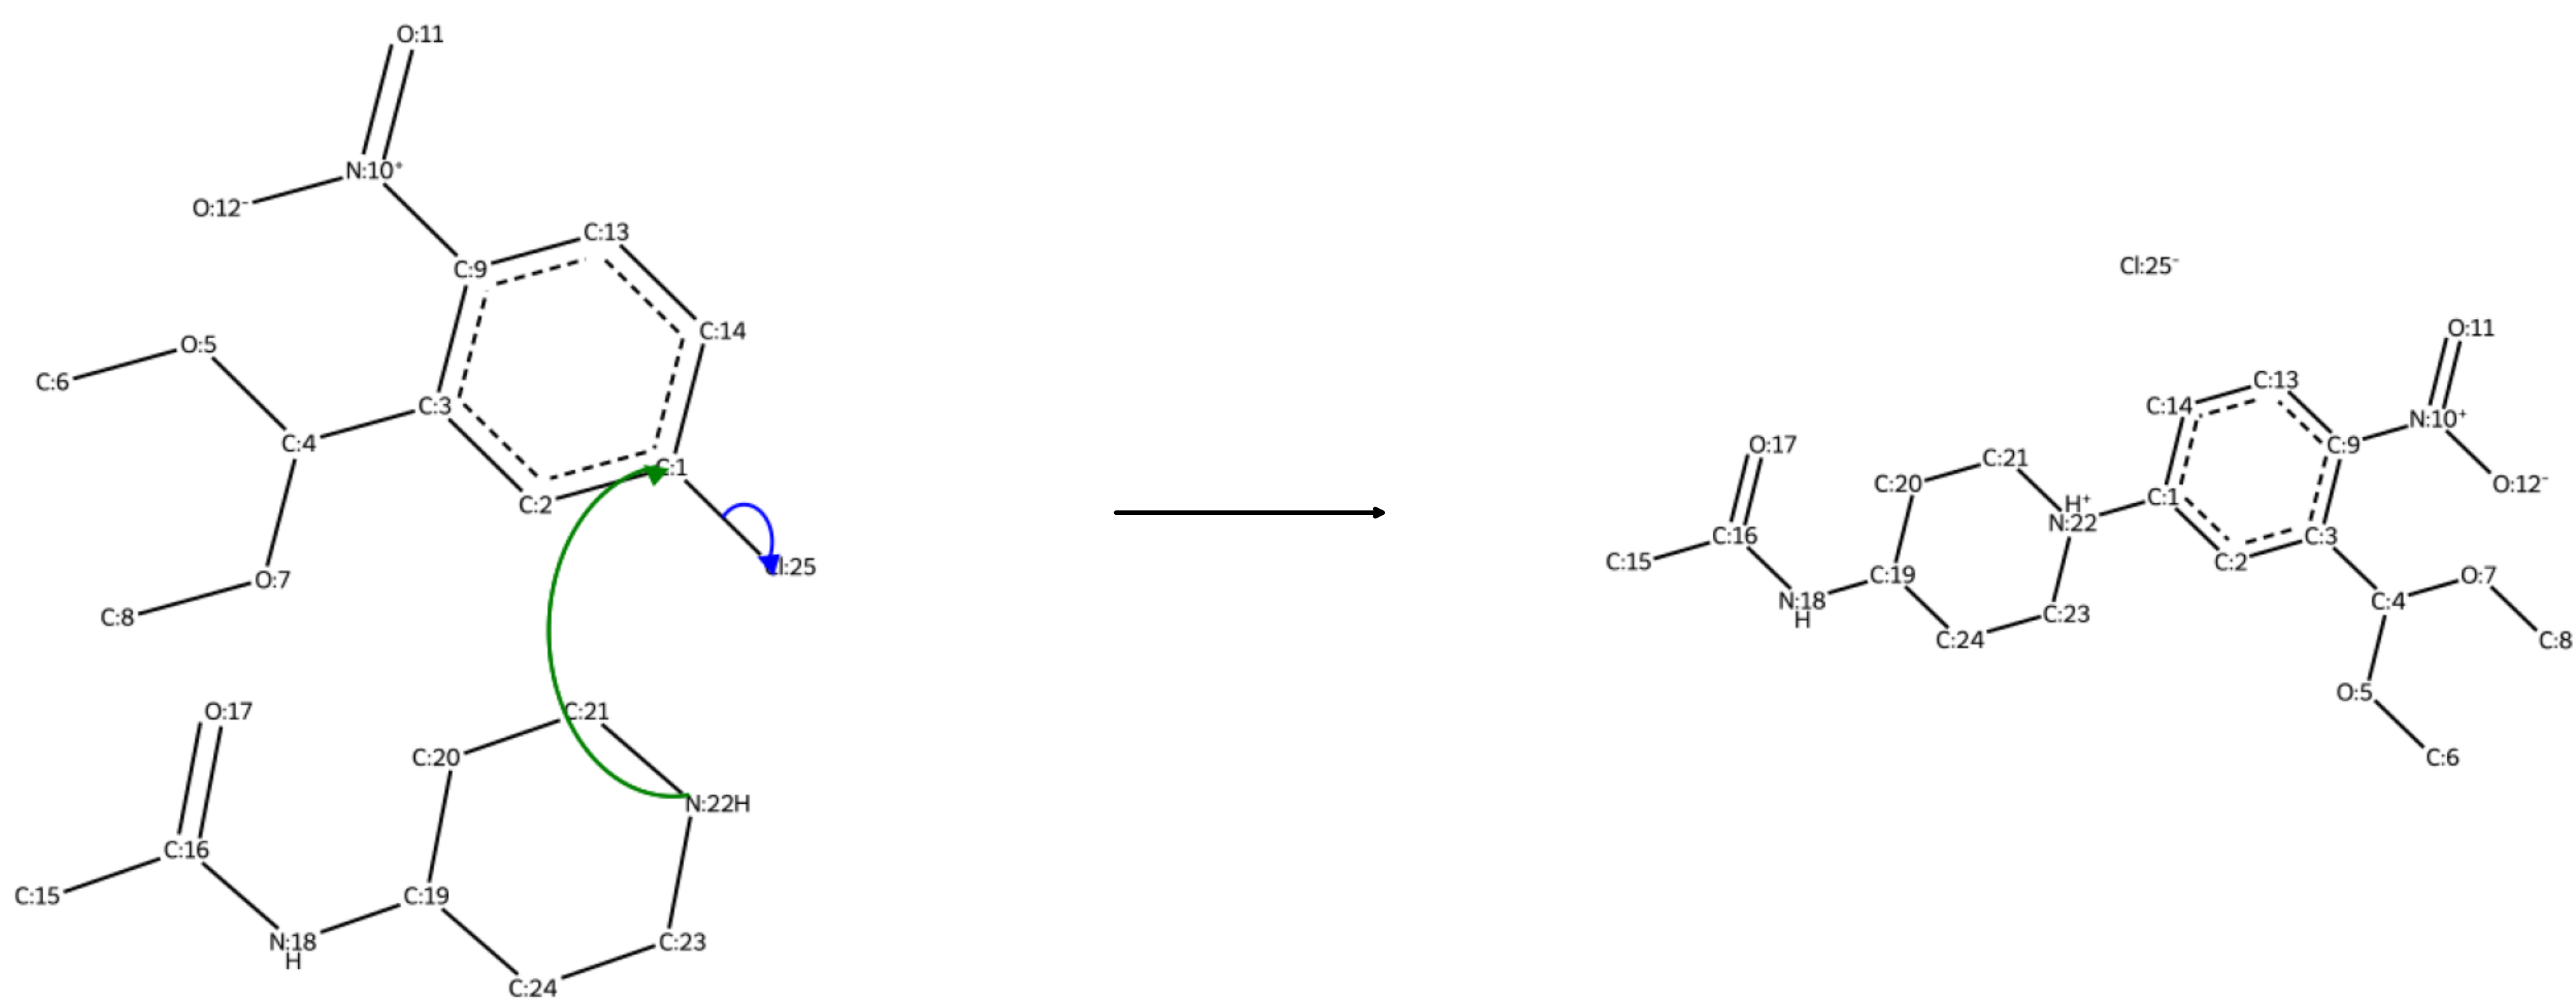

Product(s)

# Original reaction RXN\_ID:19

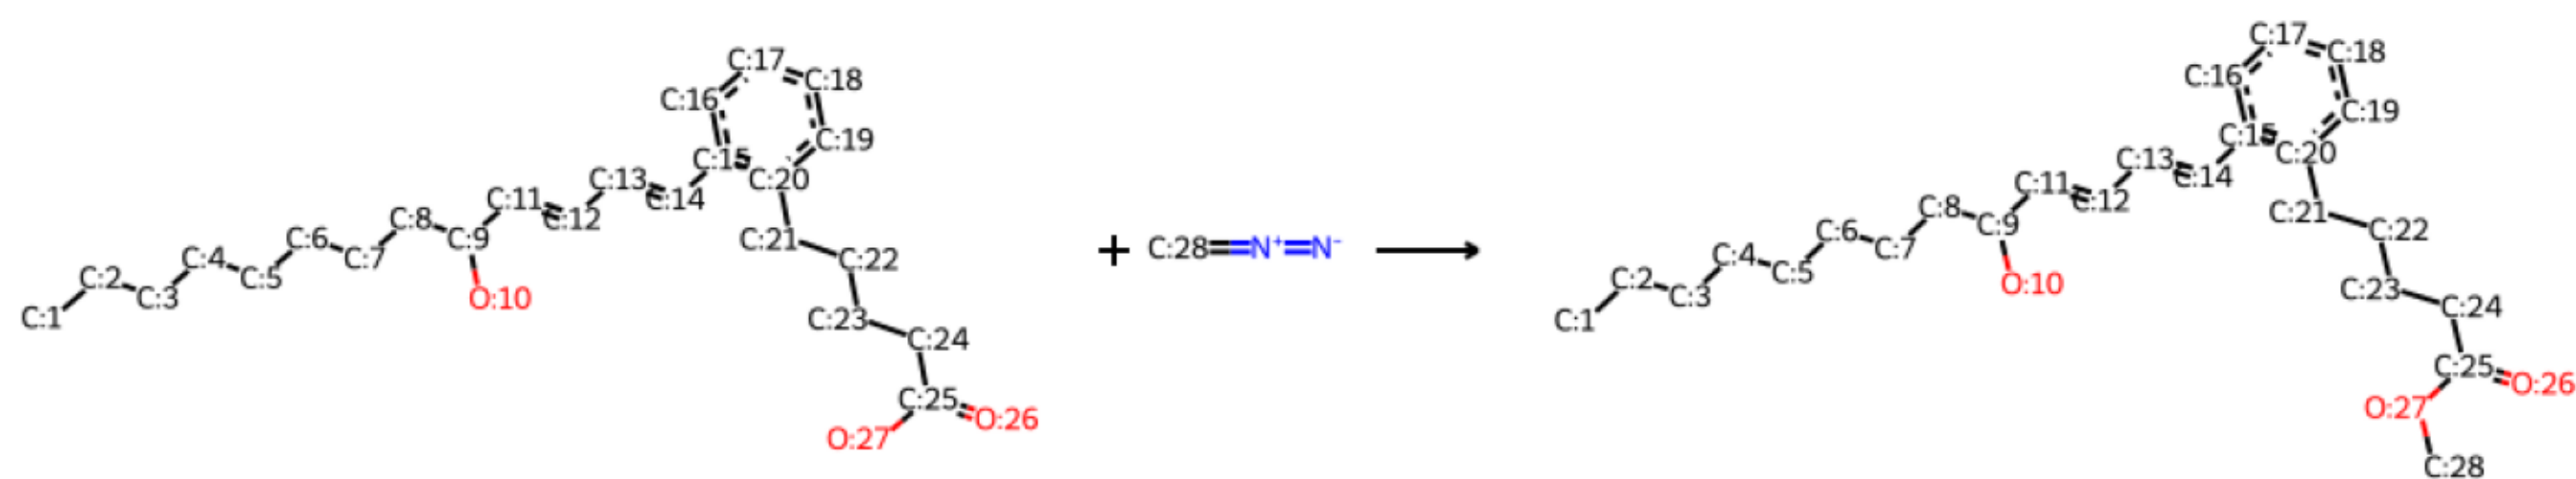

## ELECTRO-generated mechanistic pathway

[Arrow order: (1) green, (2) blue, (3) red, (4) orange]

step #1

Product(s)

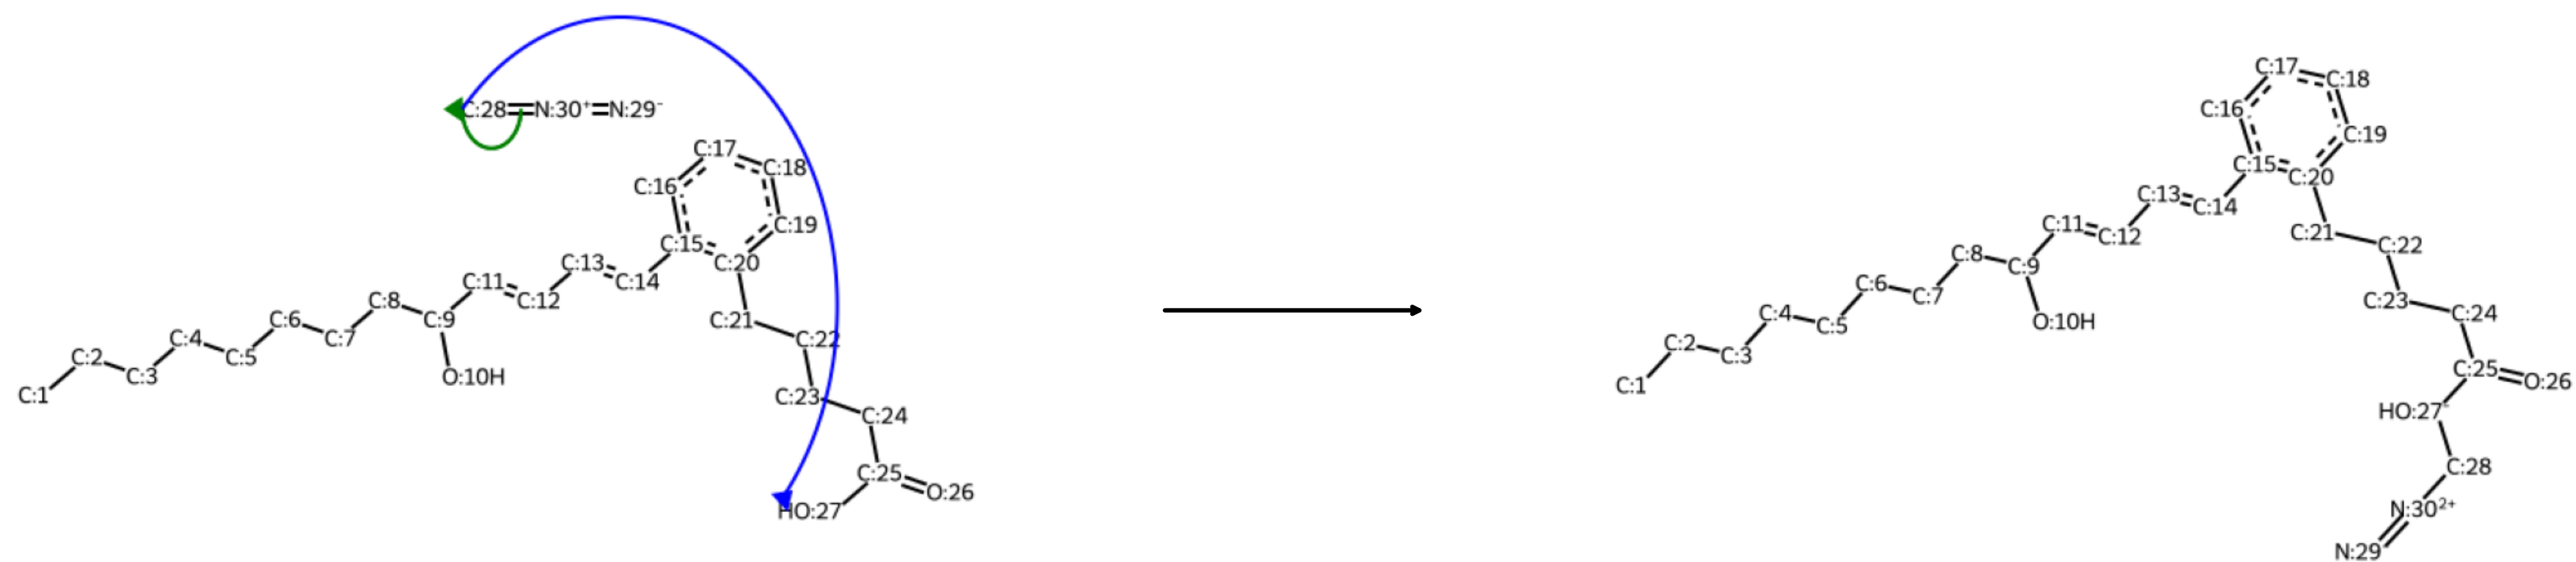



# Original reaction RXN\_ID:20

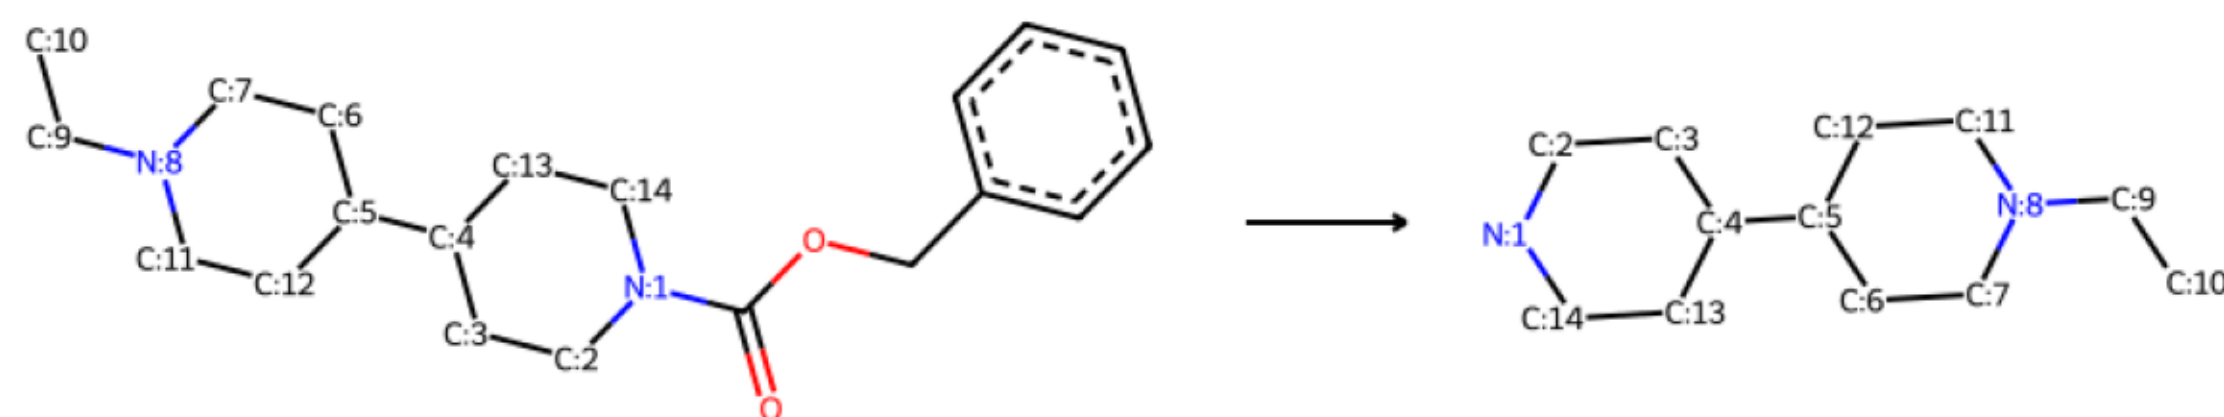

## ELECTRO-generated mechanistic pathway

[Arrow order: (1) green, (2) blue, (3) red, (4) orange]

step #1

Product(s)

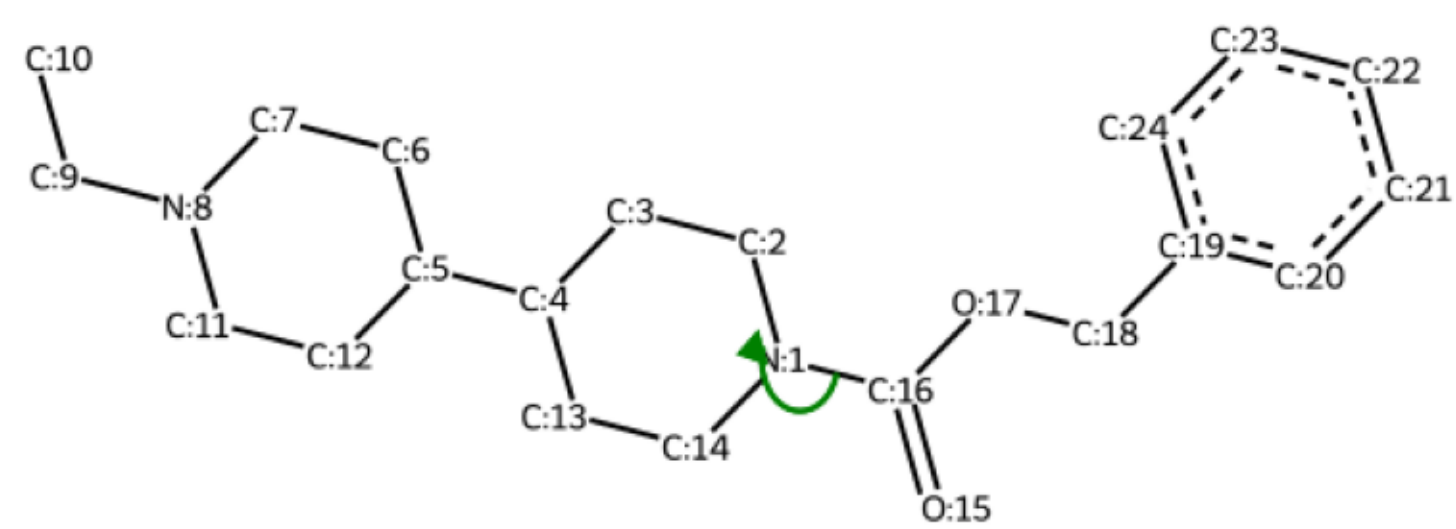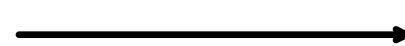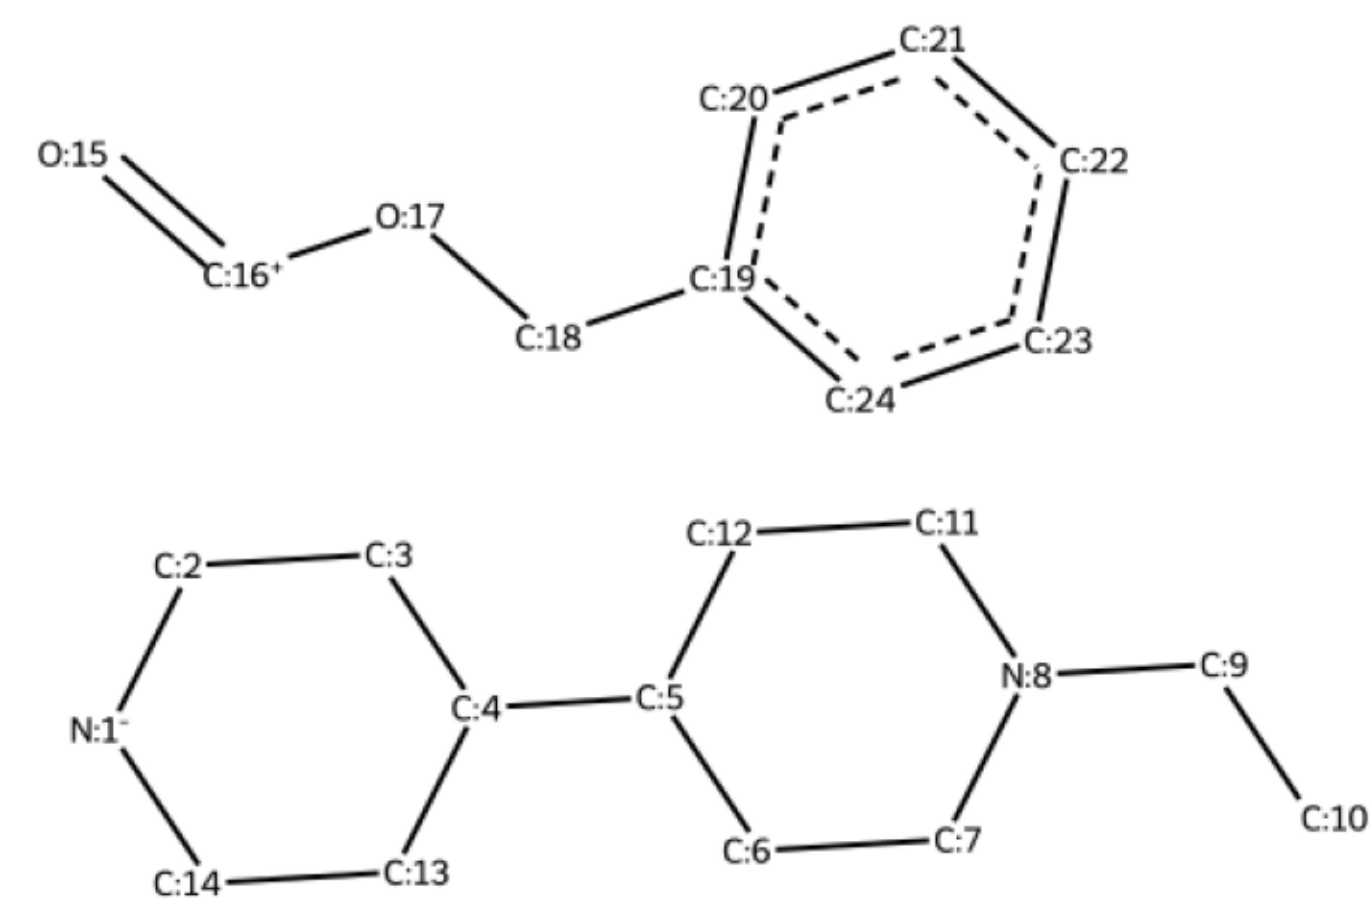

# Original reaction RXN\_ID:21

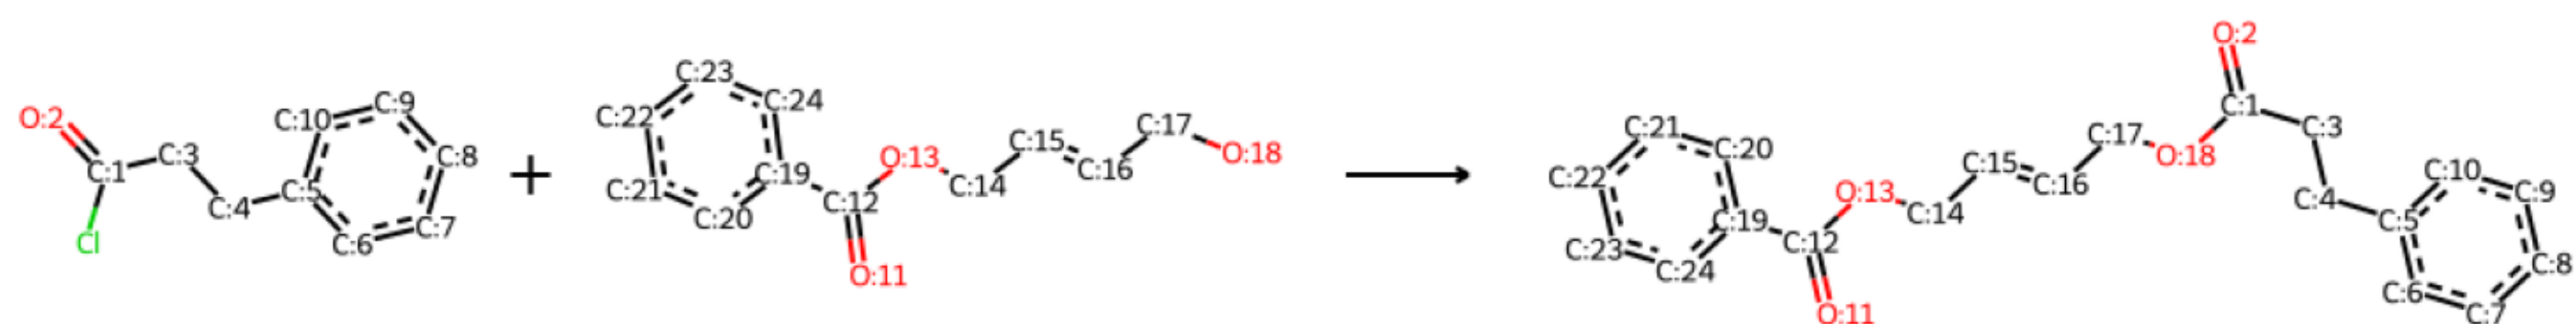

## ELECTRO-generated mechanistic pathway

[Arrow order: (1) green, (2) blue, (3) red, (4) orange]

step #1

Product(s)

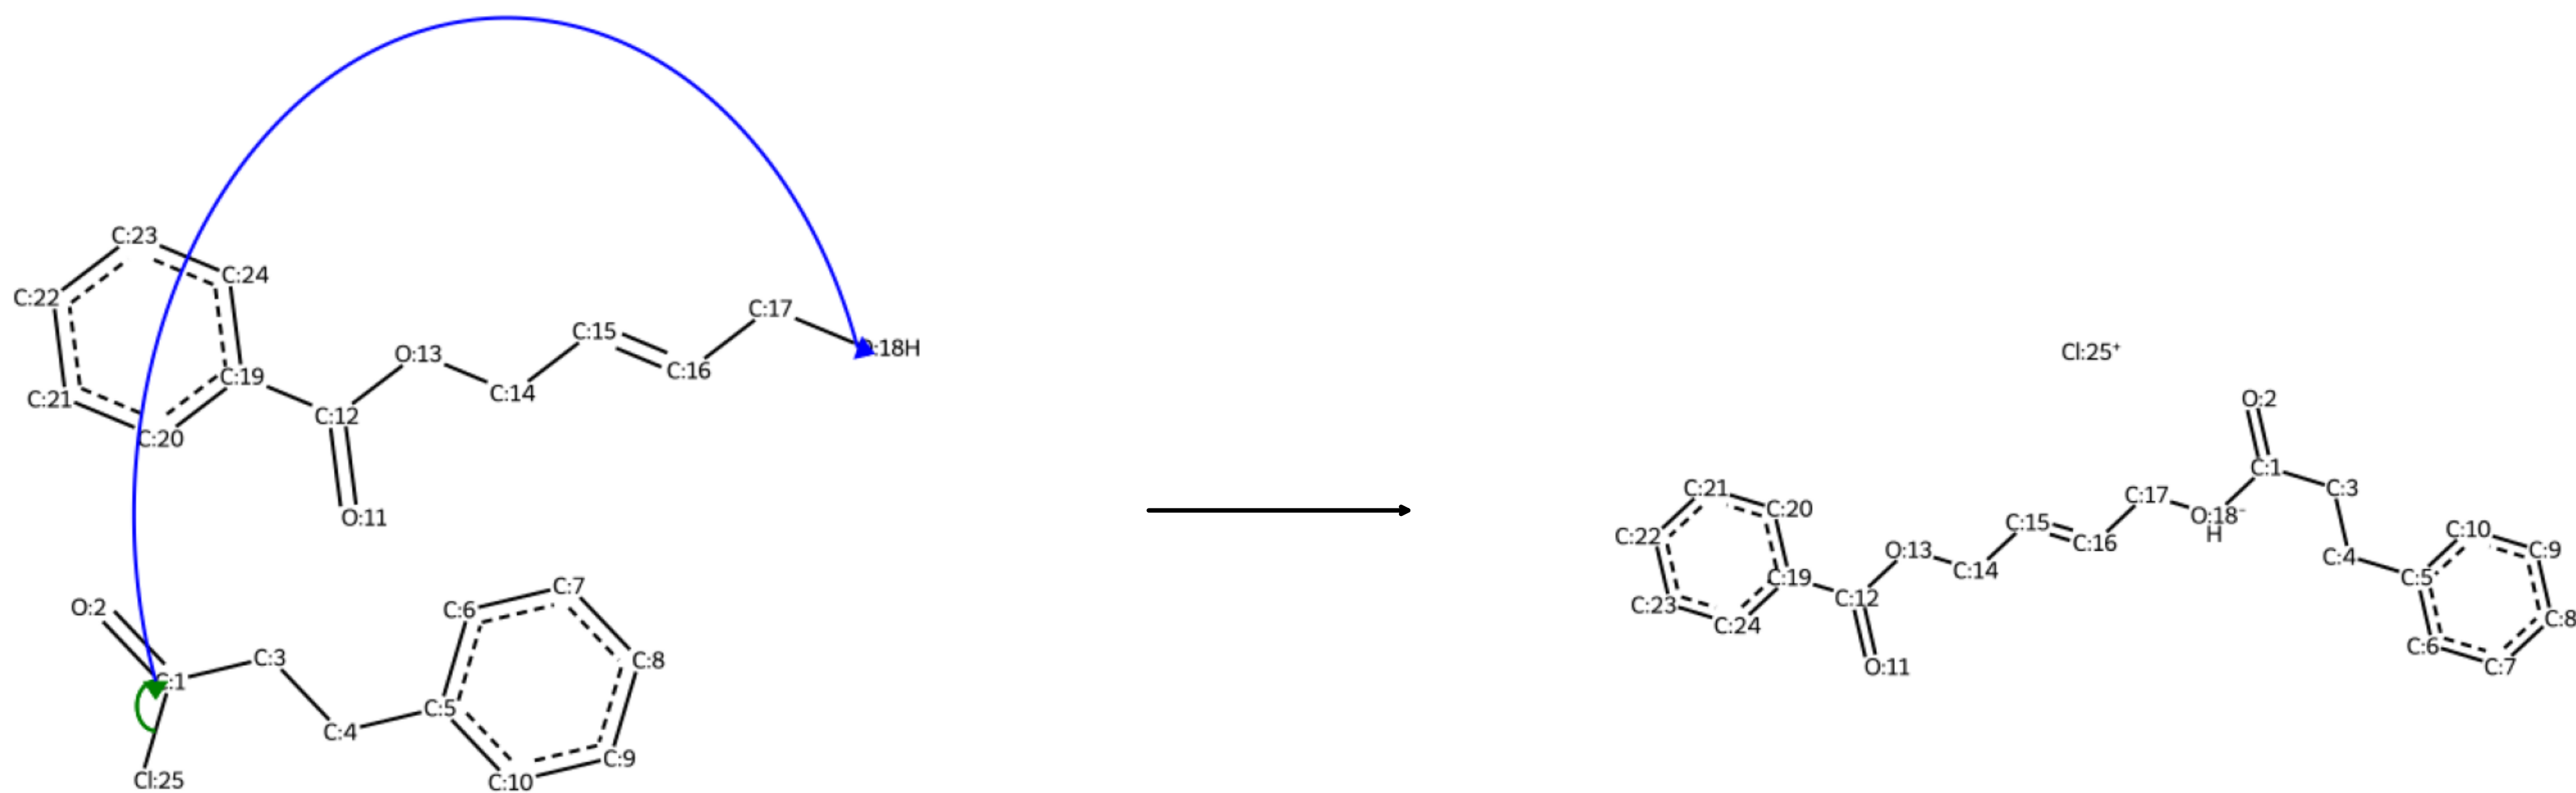



# Original reaction RXN\_ID:22

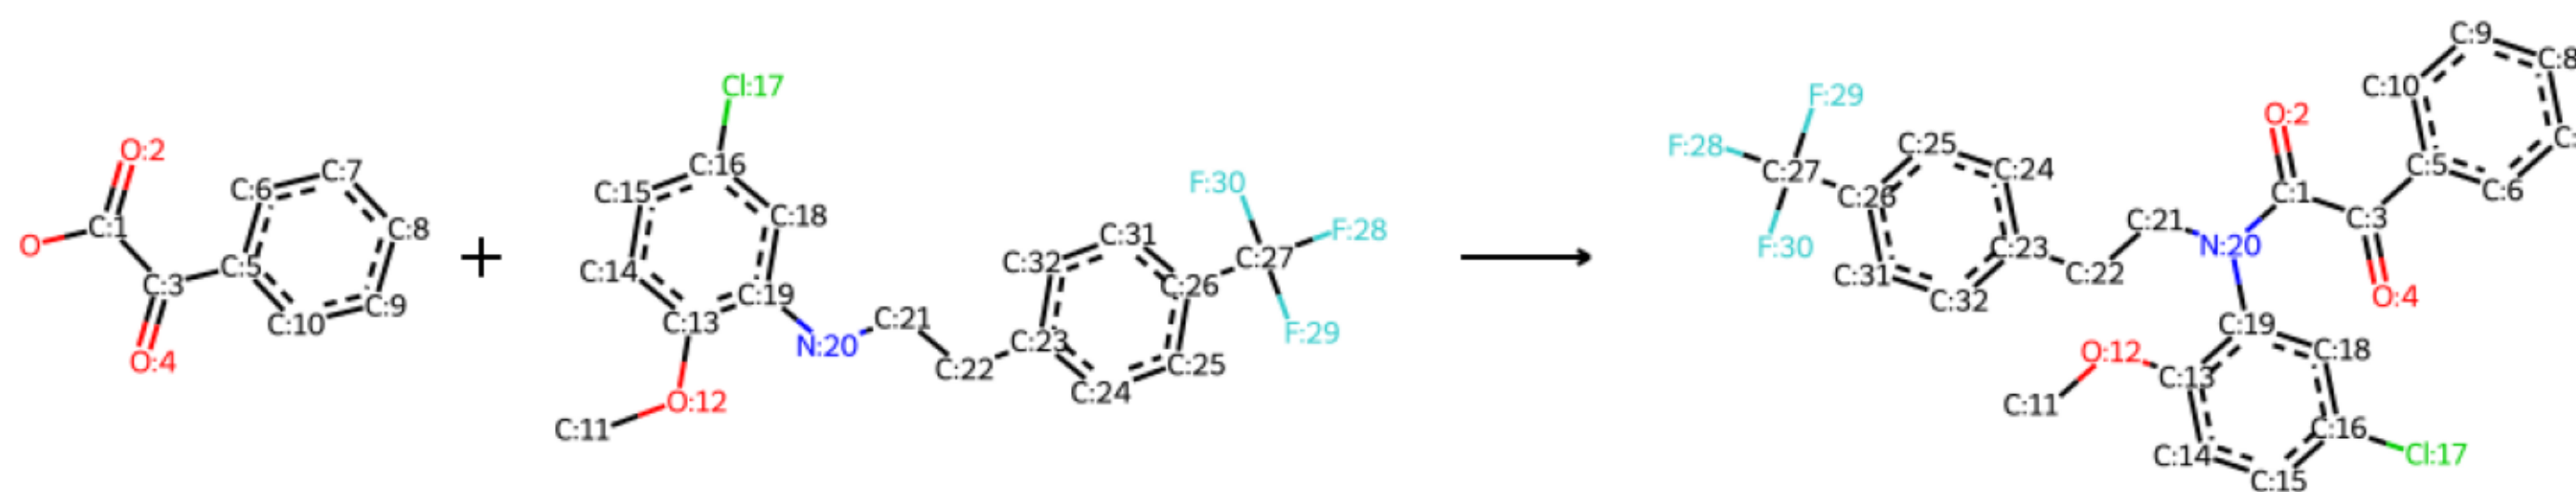

## ELECTRO-generated mechanistic pathway

[Arrow order: (1) green, (2) blue, (3) red, (4) orange]

step #1

Product(s)

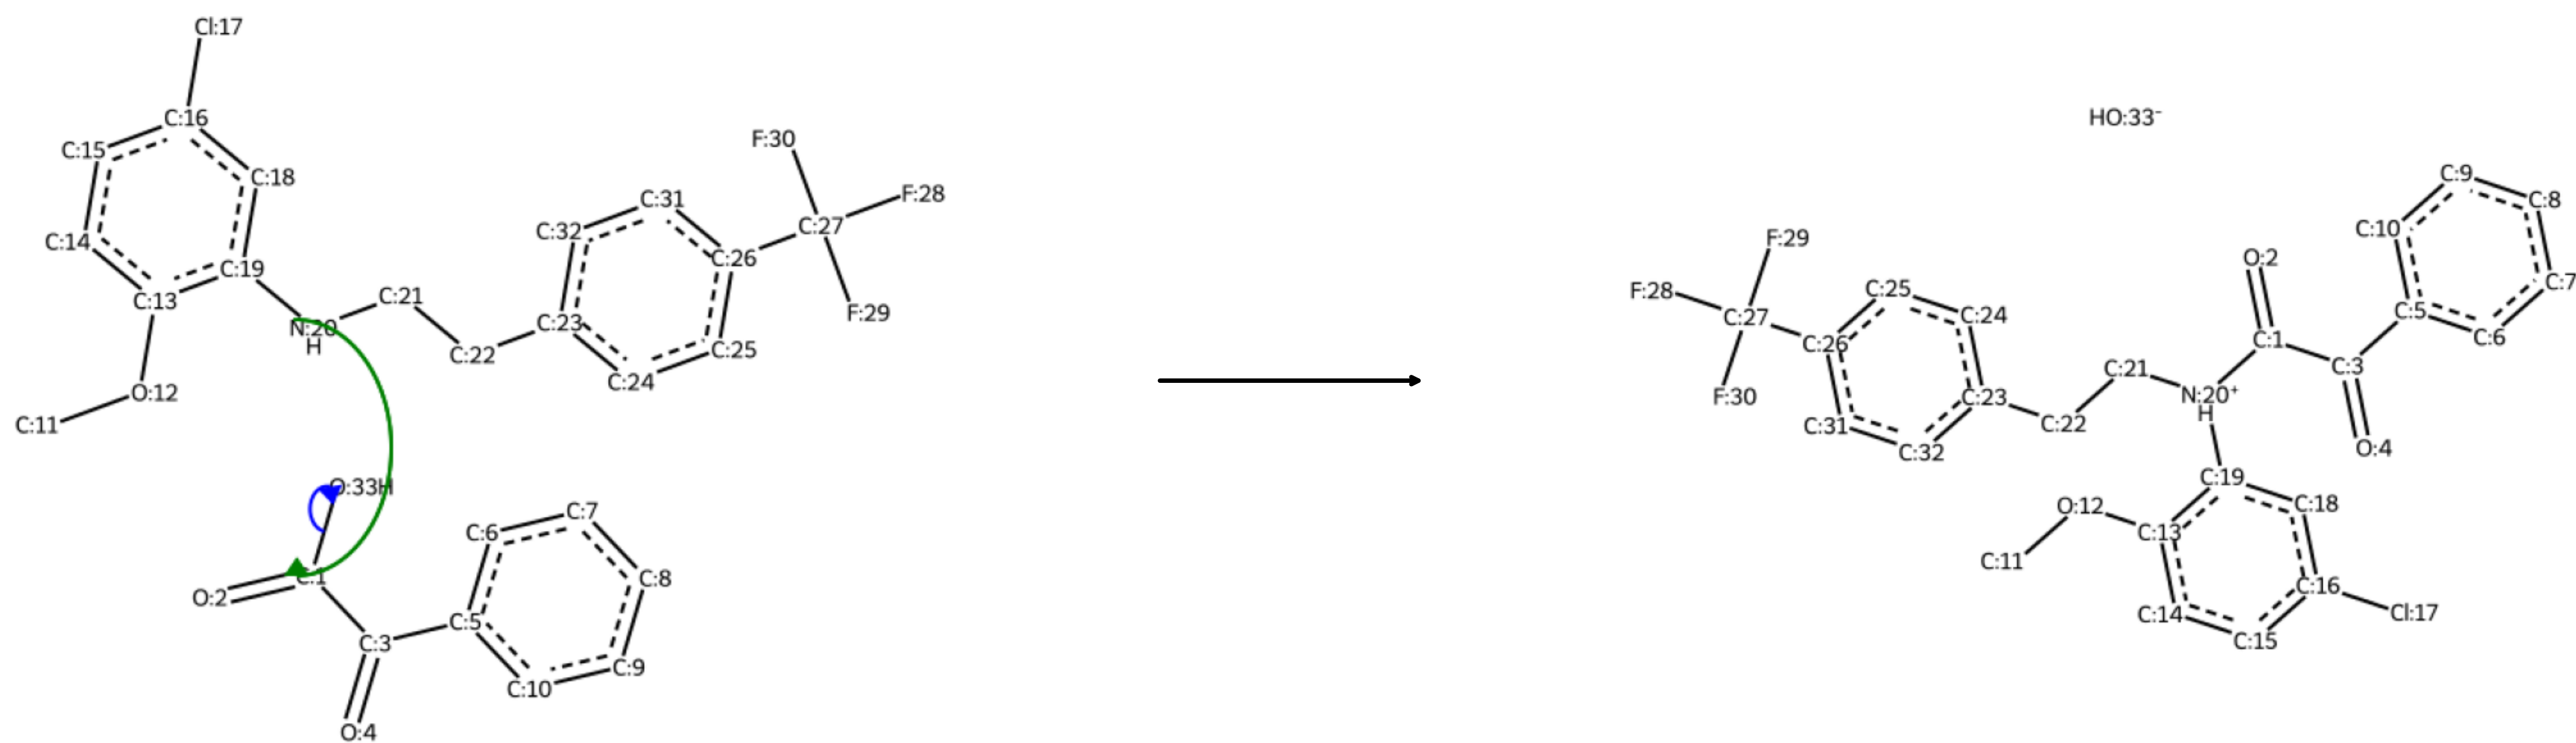

# Original reaction RXN\_ID:23

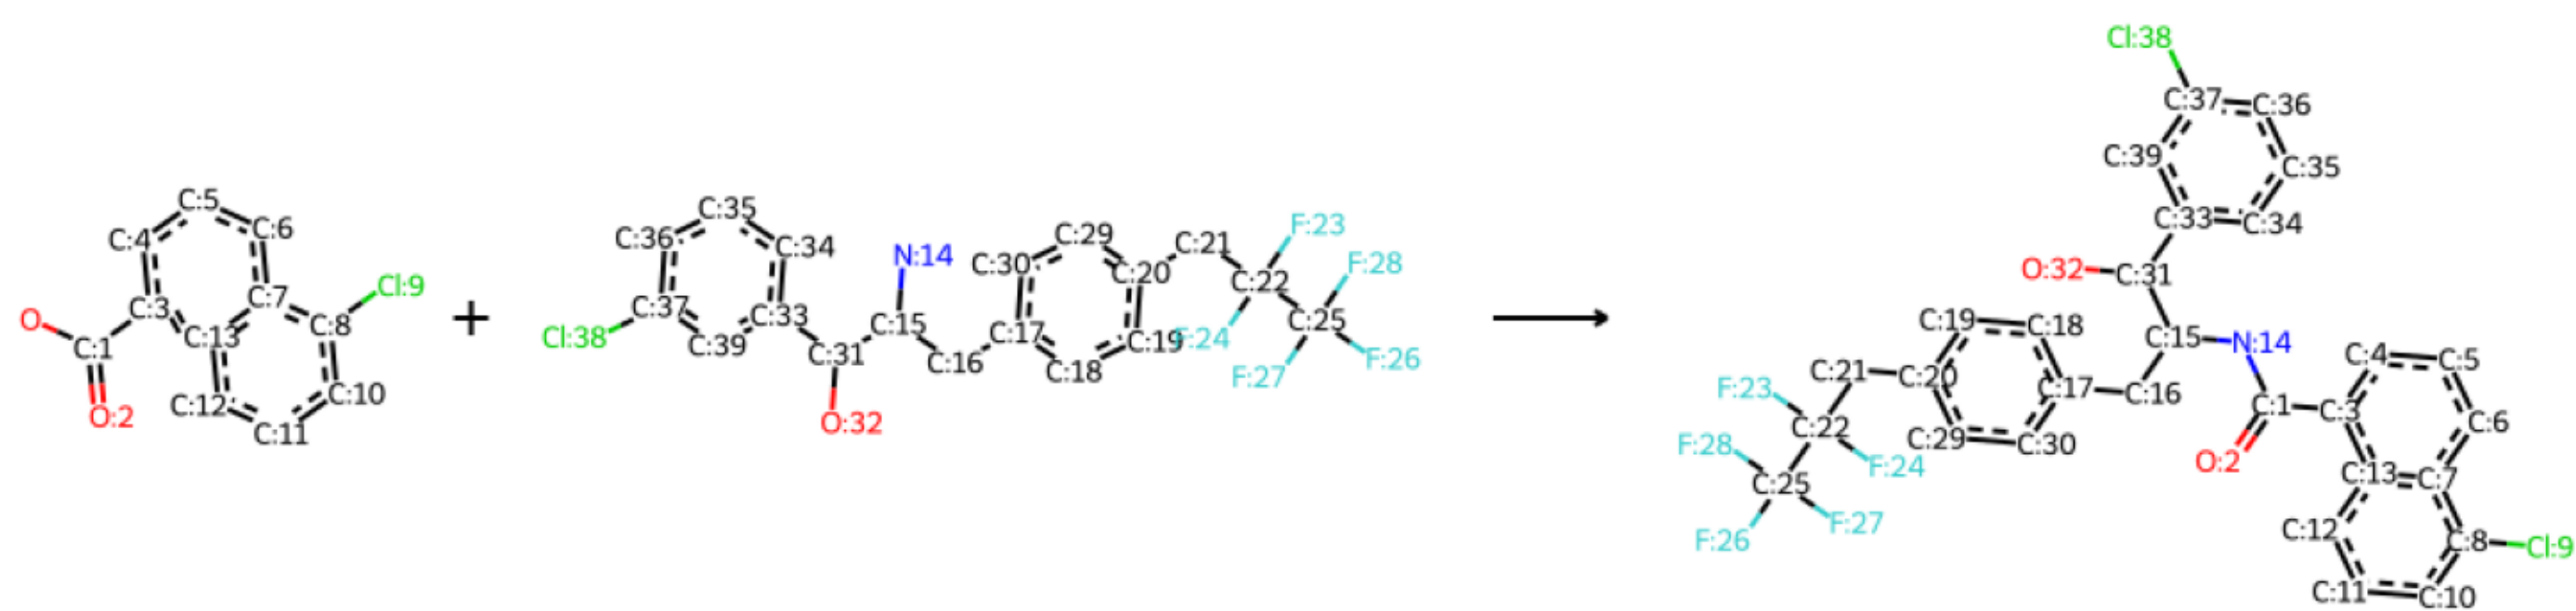

## ELECTRO-generated mechanistic pathway

[Arrow order: (1) green, (2) blue, (3) red, (4) orange]

step #1

Product(s)

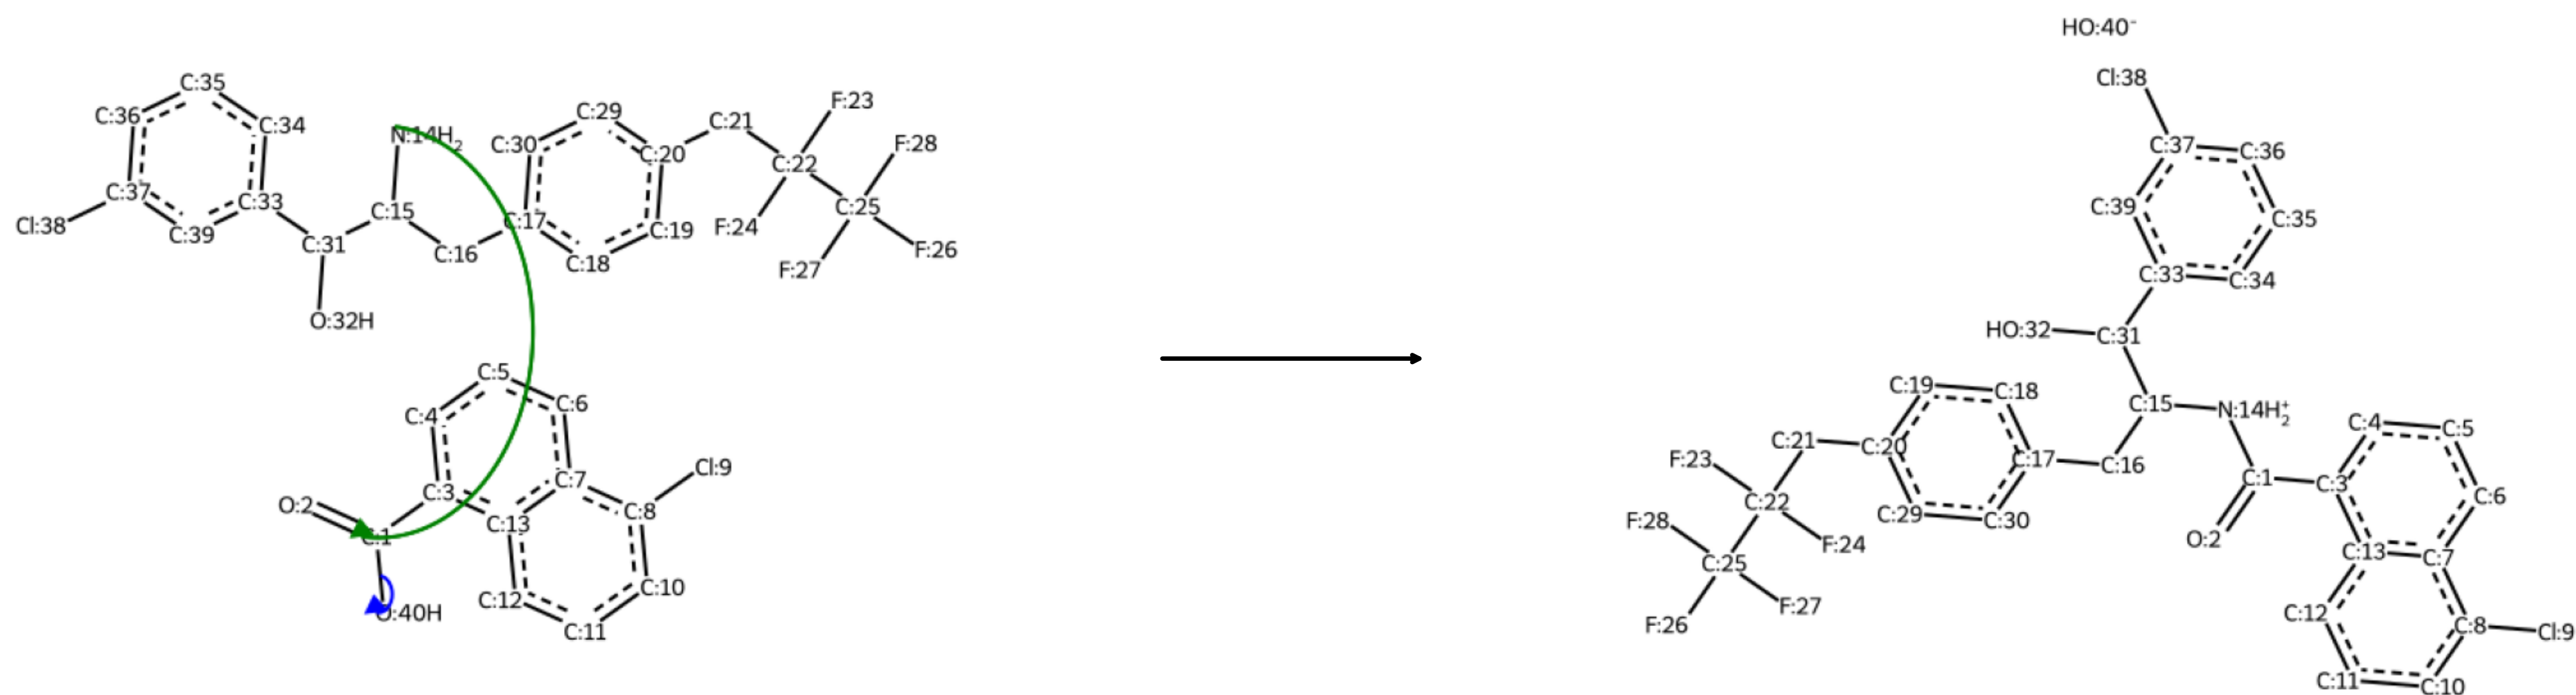



# Original reaction RXN\_ID:24

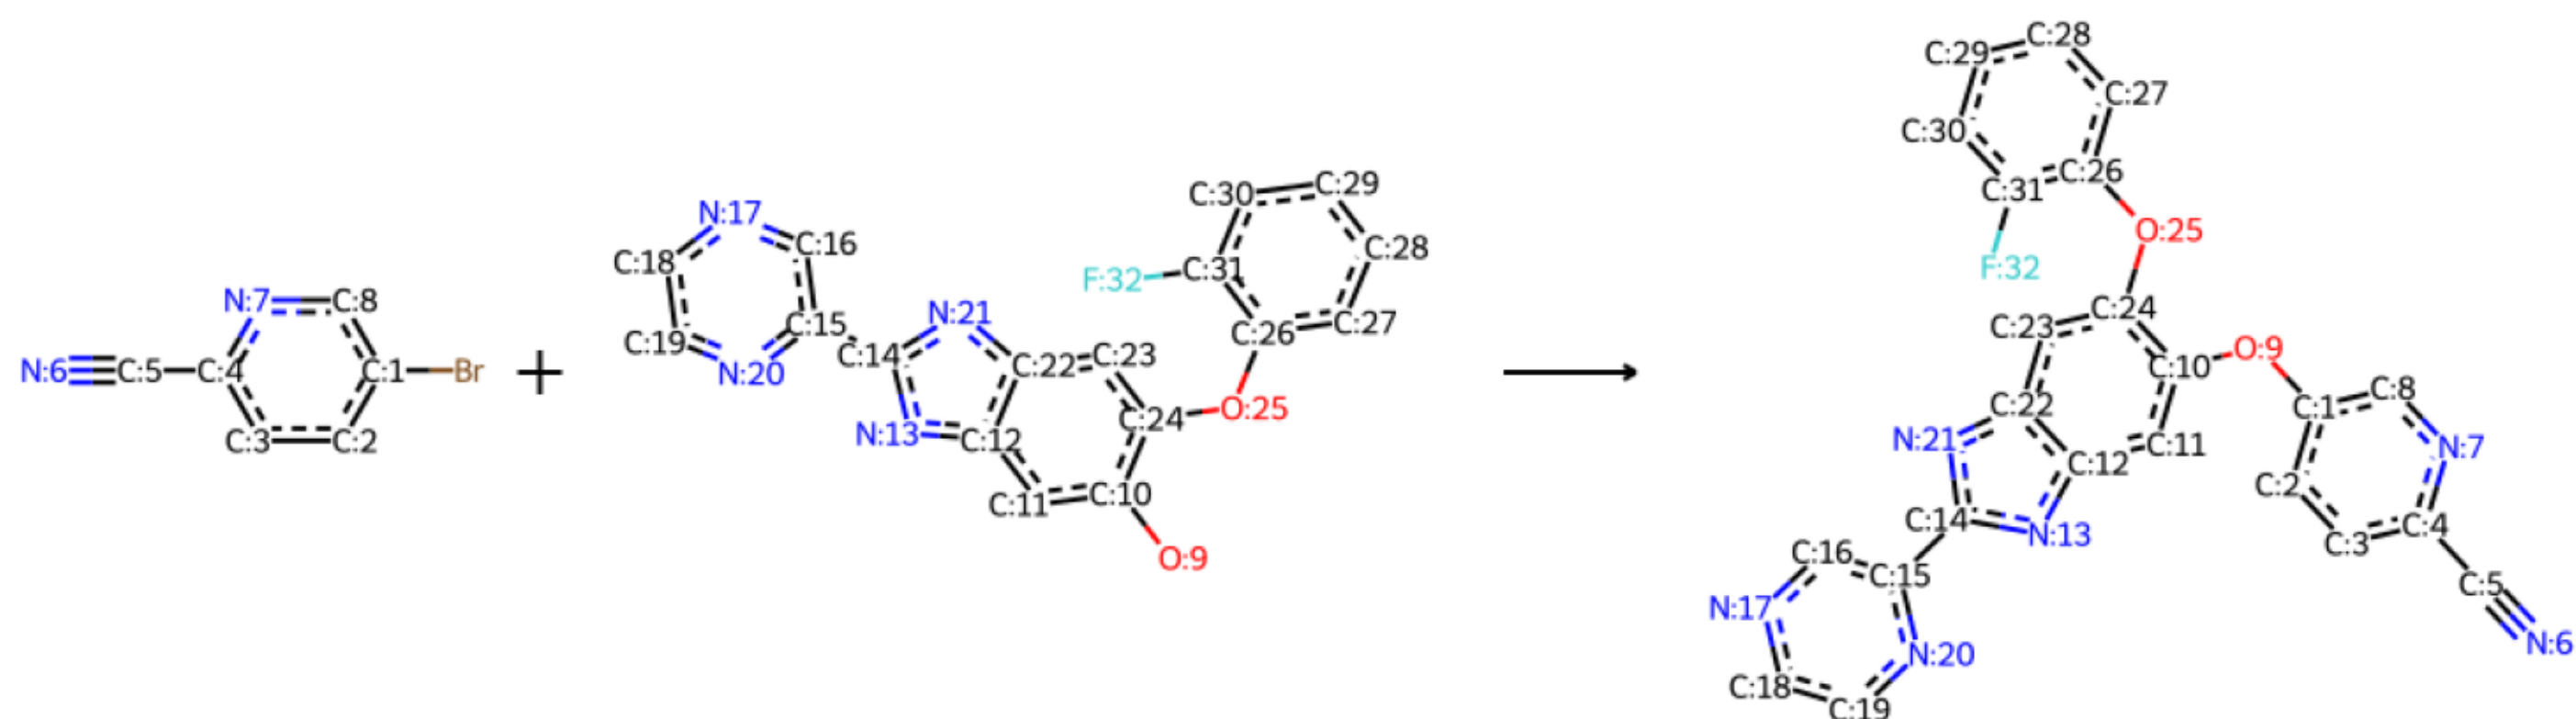

## ELECTRO-generated mechanistic pathway

[Arrow order: (1) green, (2) blue, (3) red, (4) orange]

step #1

Product(s)

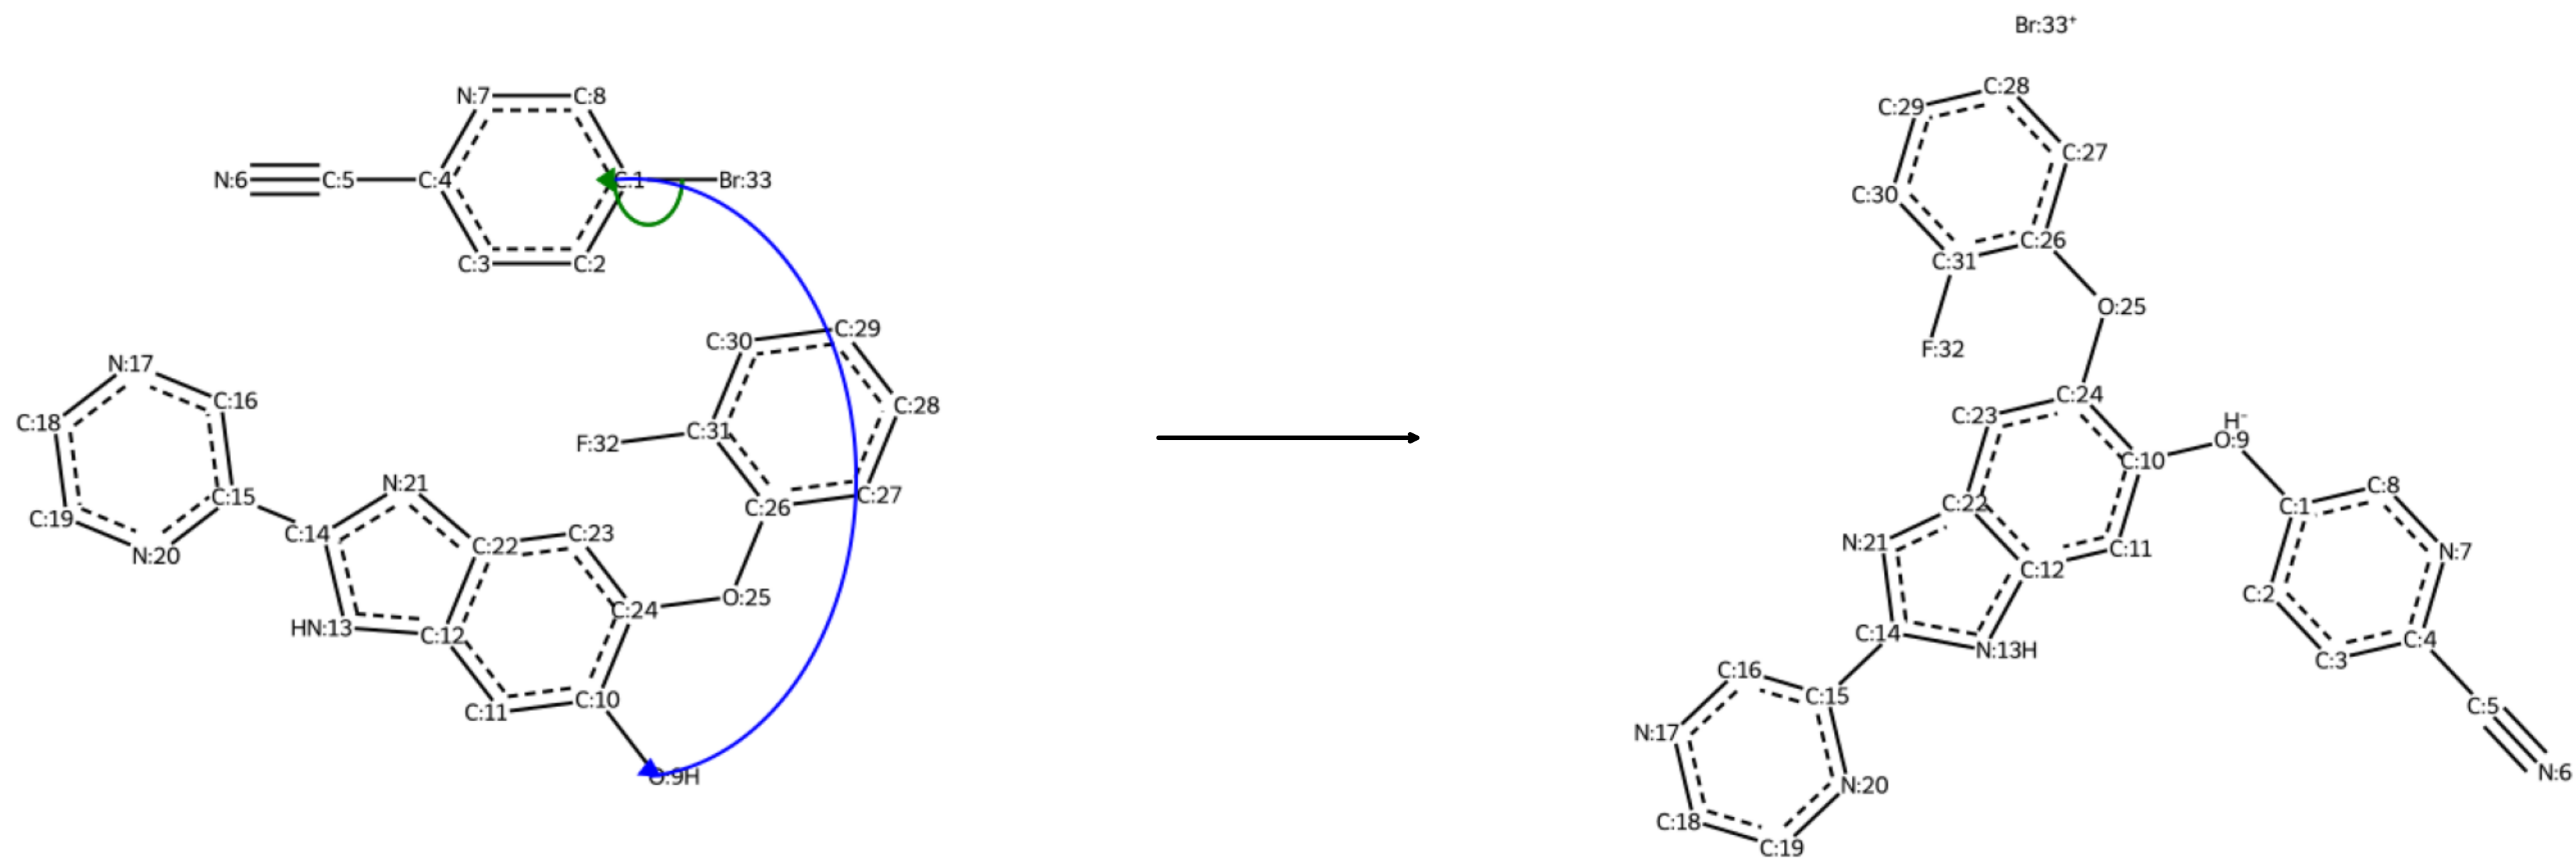

# Original reaction RXN\_ID:25

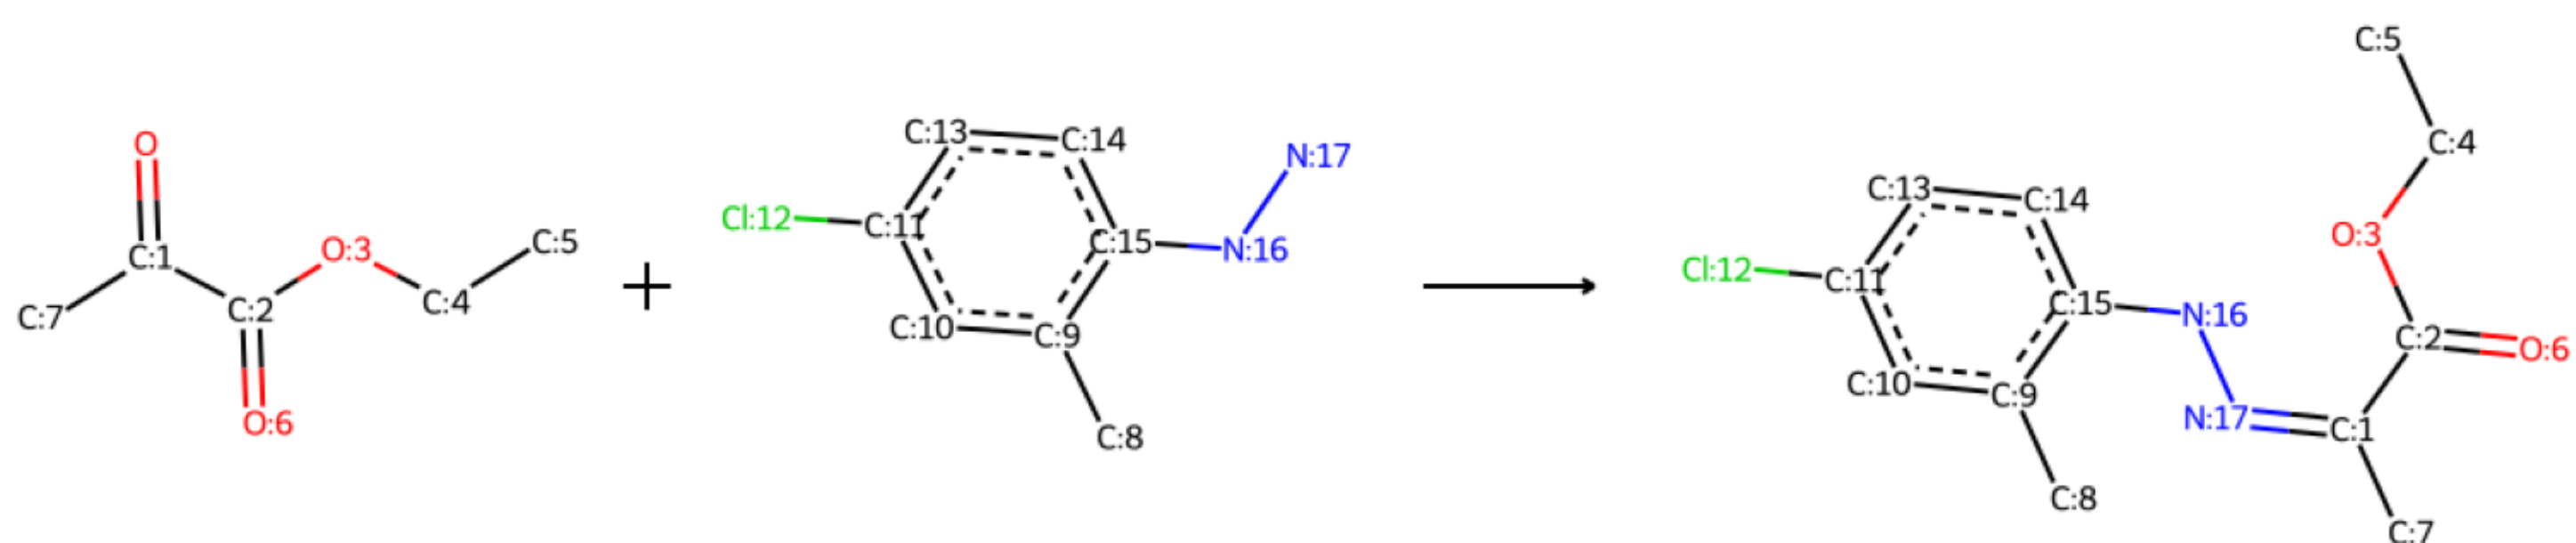

## ELECTRO-generated mechanistic pathway

[Arrow order: (1) green, (2) blue, (3) red, (4) orange]

step #1

Product(s)

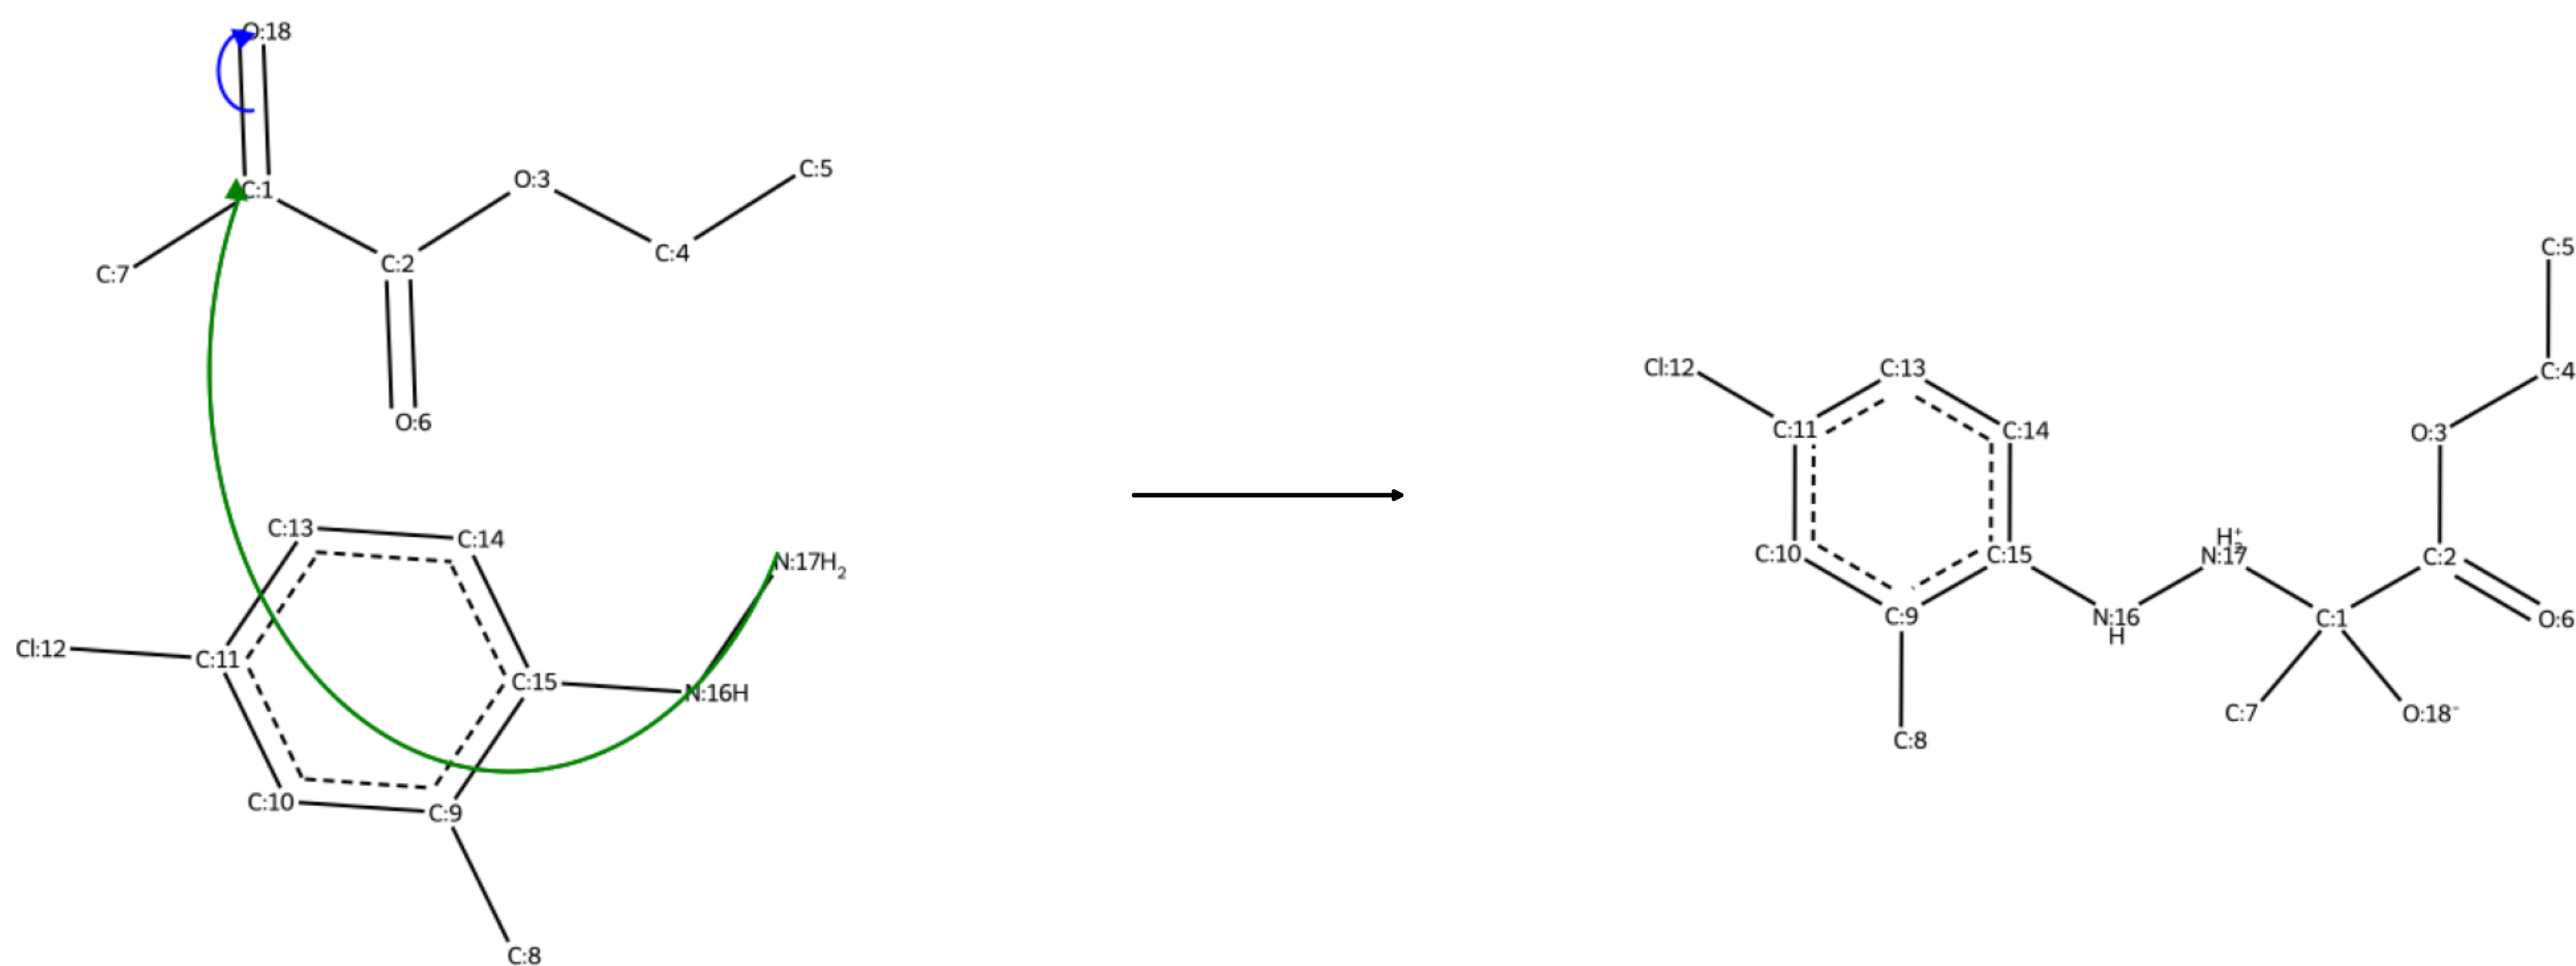



# Original reaction RXN\_ID:26

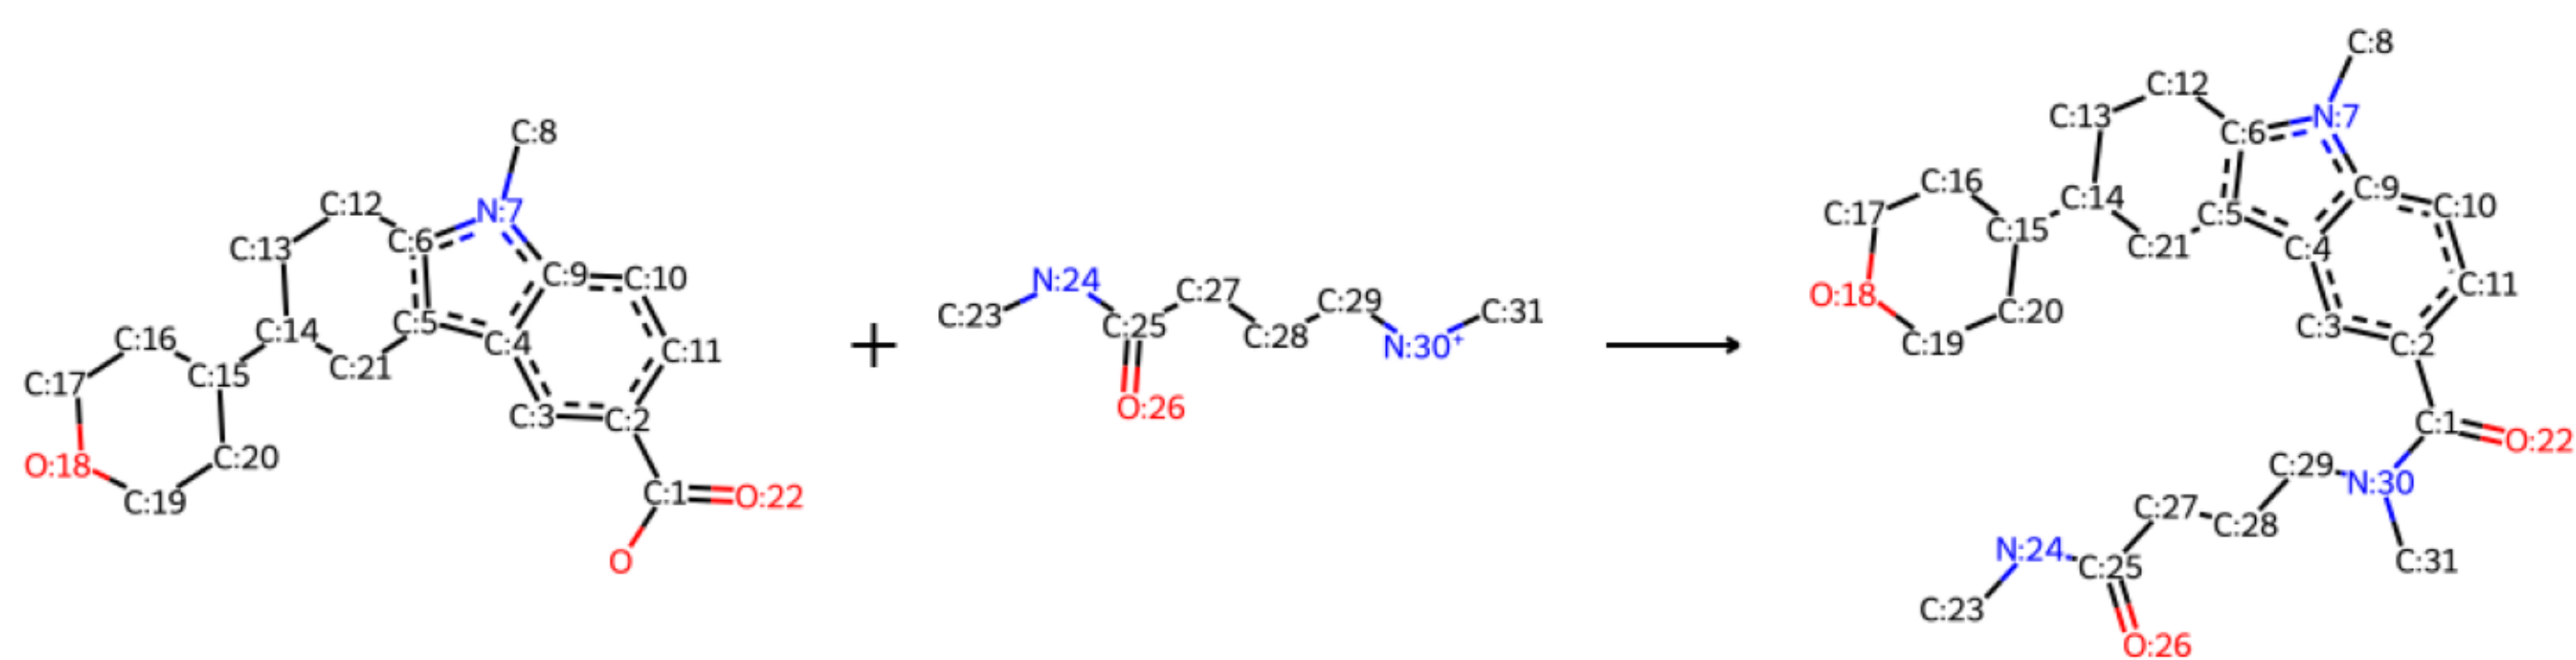

## ELECTRO-generated mechanistic pathway

[Arrow order: (1) green, (2) blue, (3) red, (4) orange]

step #1

Product(s)

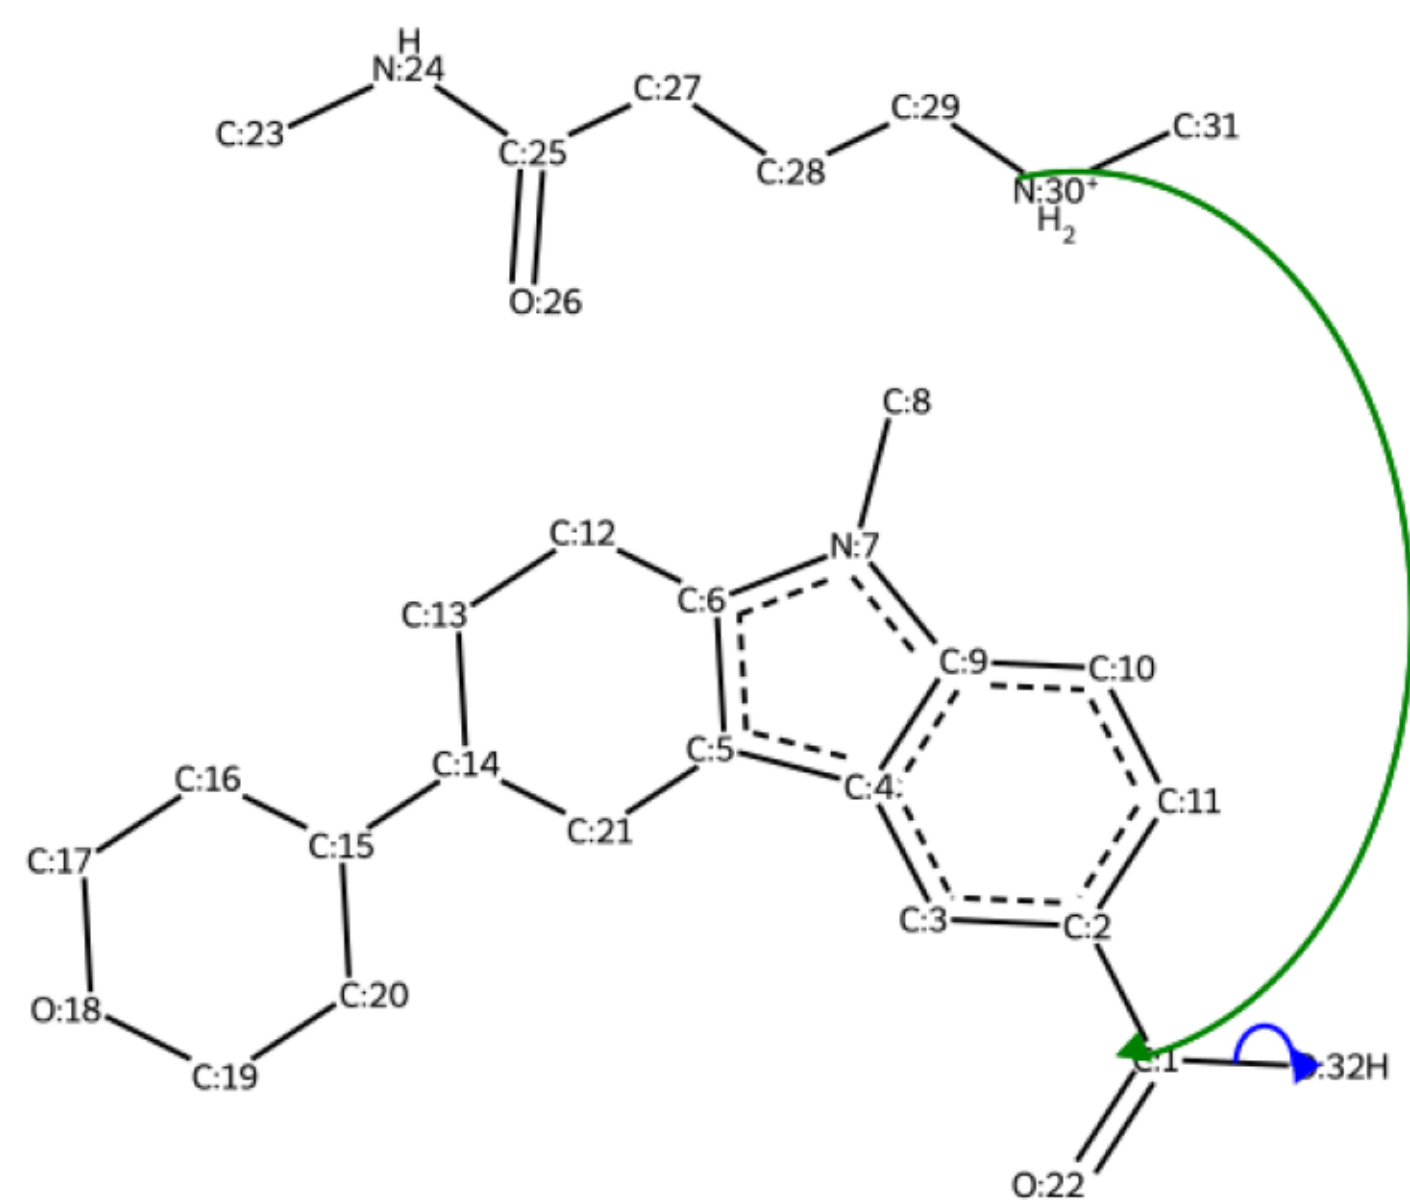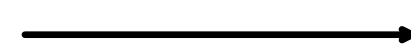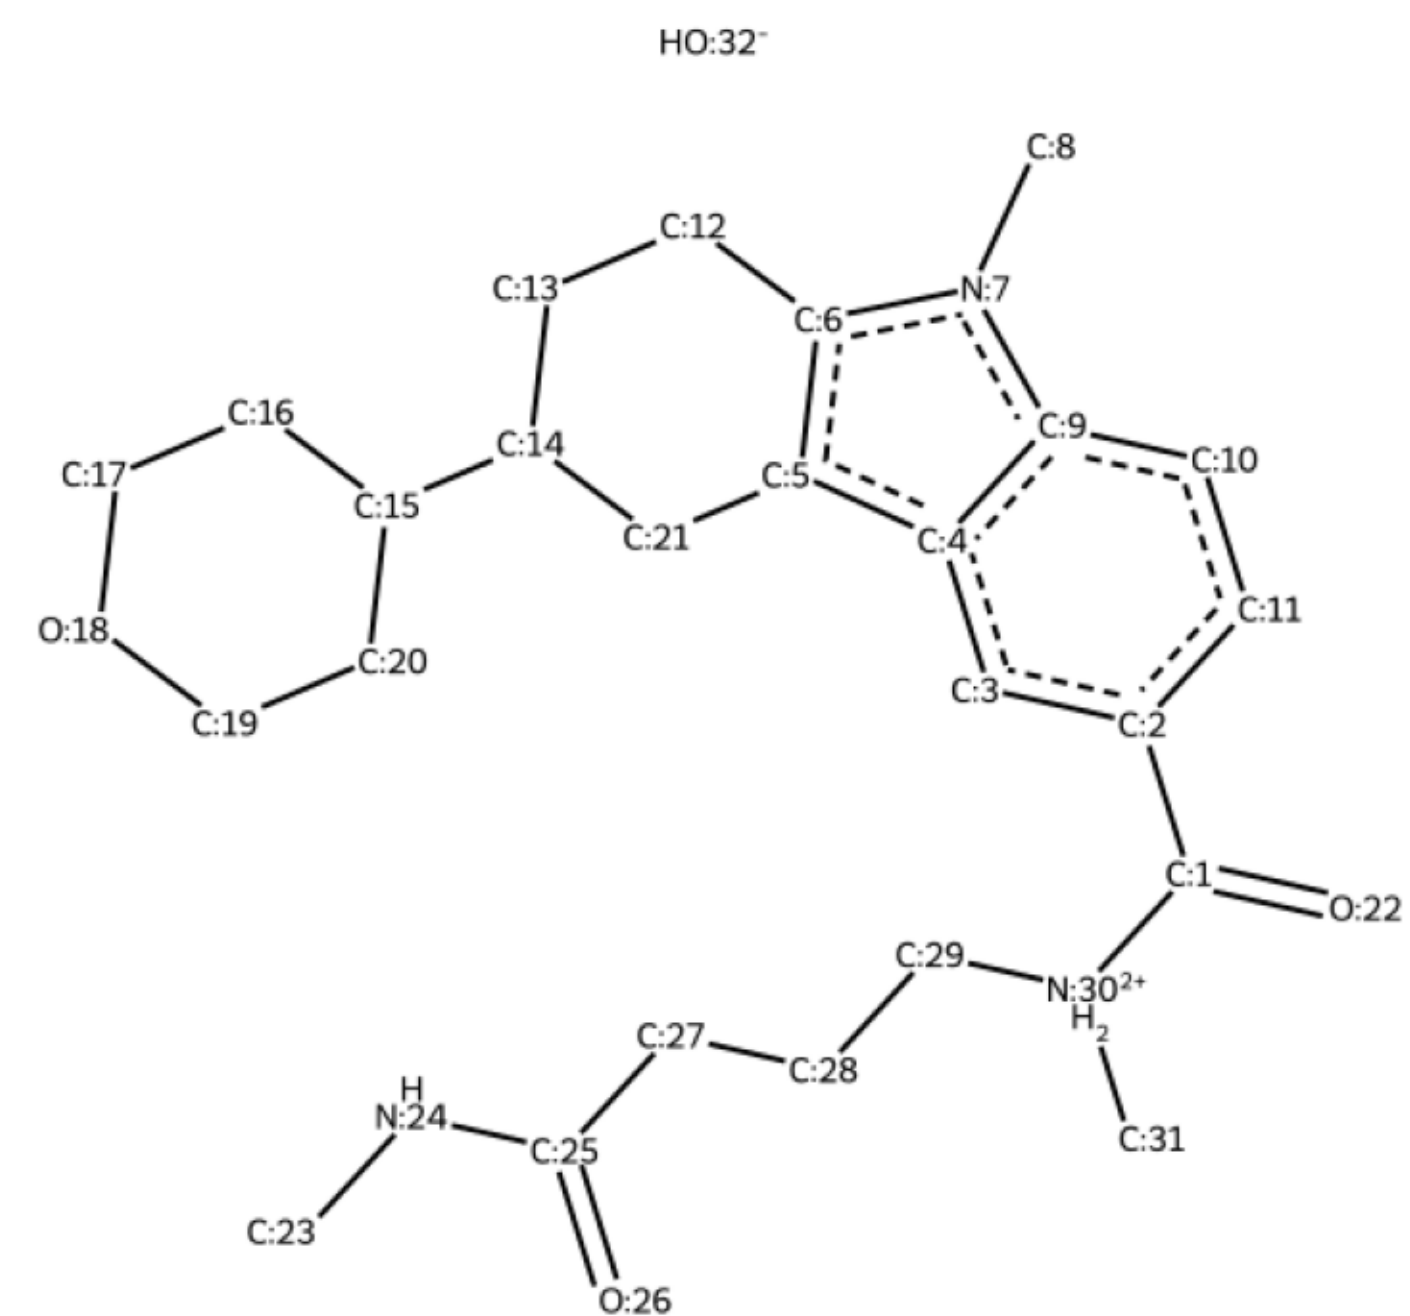

# Original reaction RXN\_ID:27

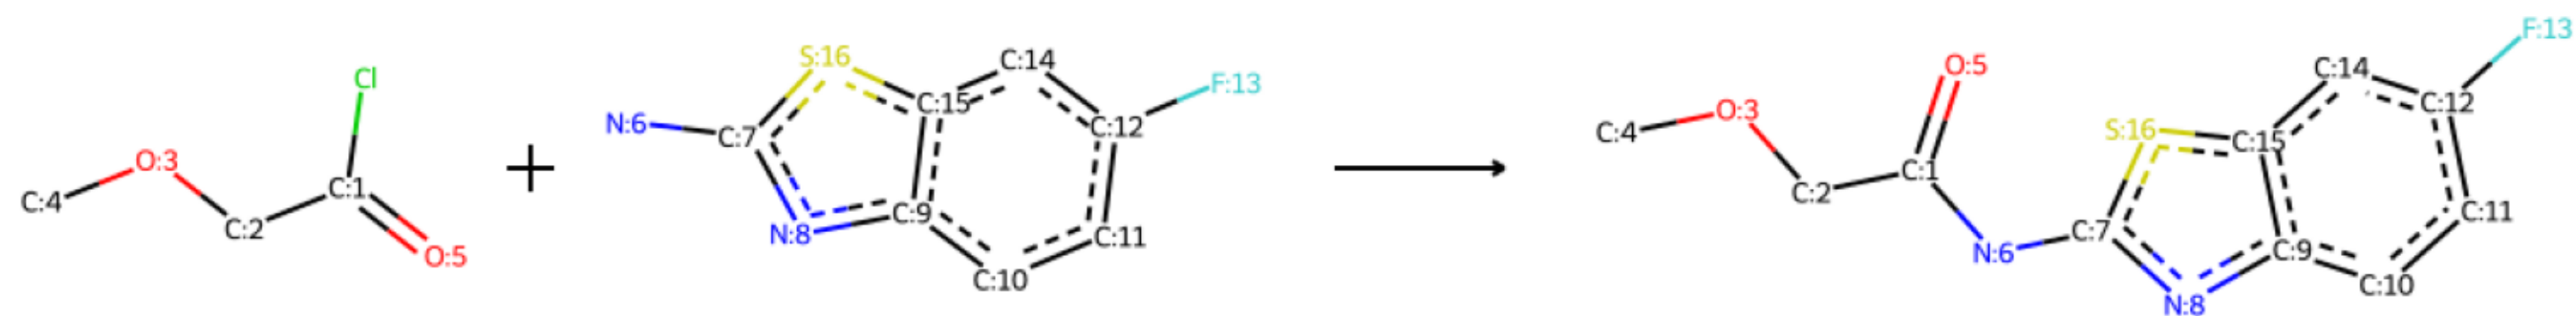

## ELECTRO-generated mechanistic pathway

[Arrow order: (1) green, (2) blue, (3) red, (4) orange]

step #1

Product(s)

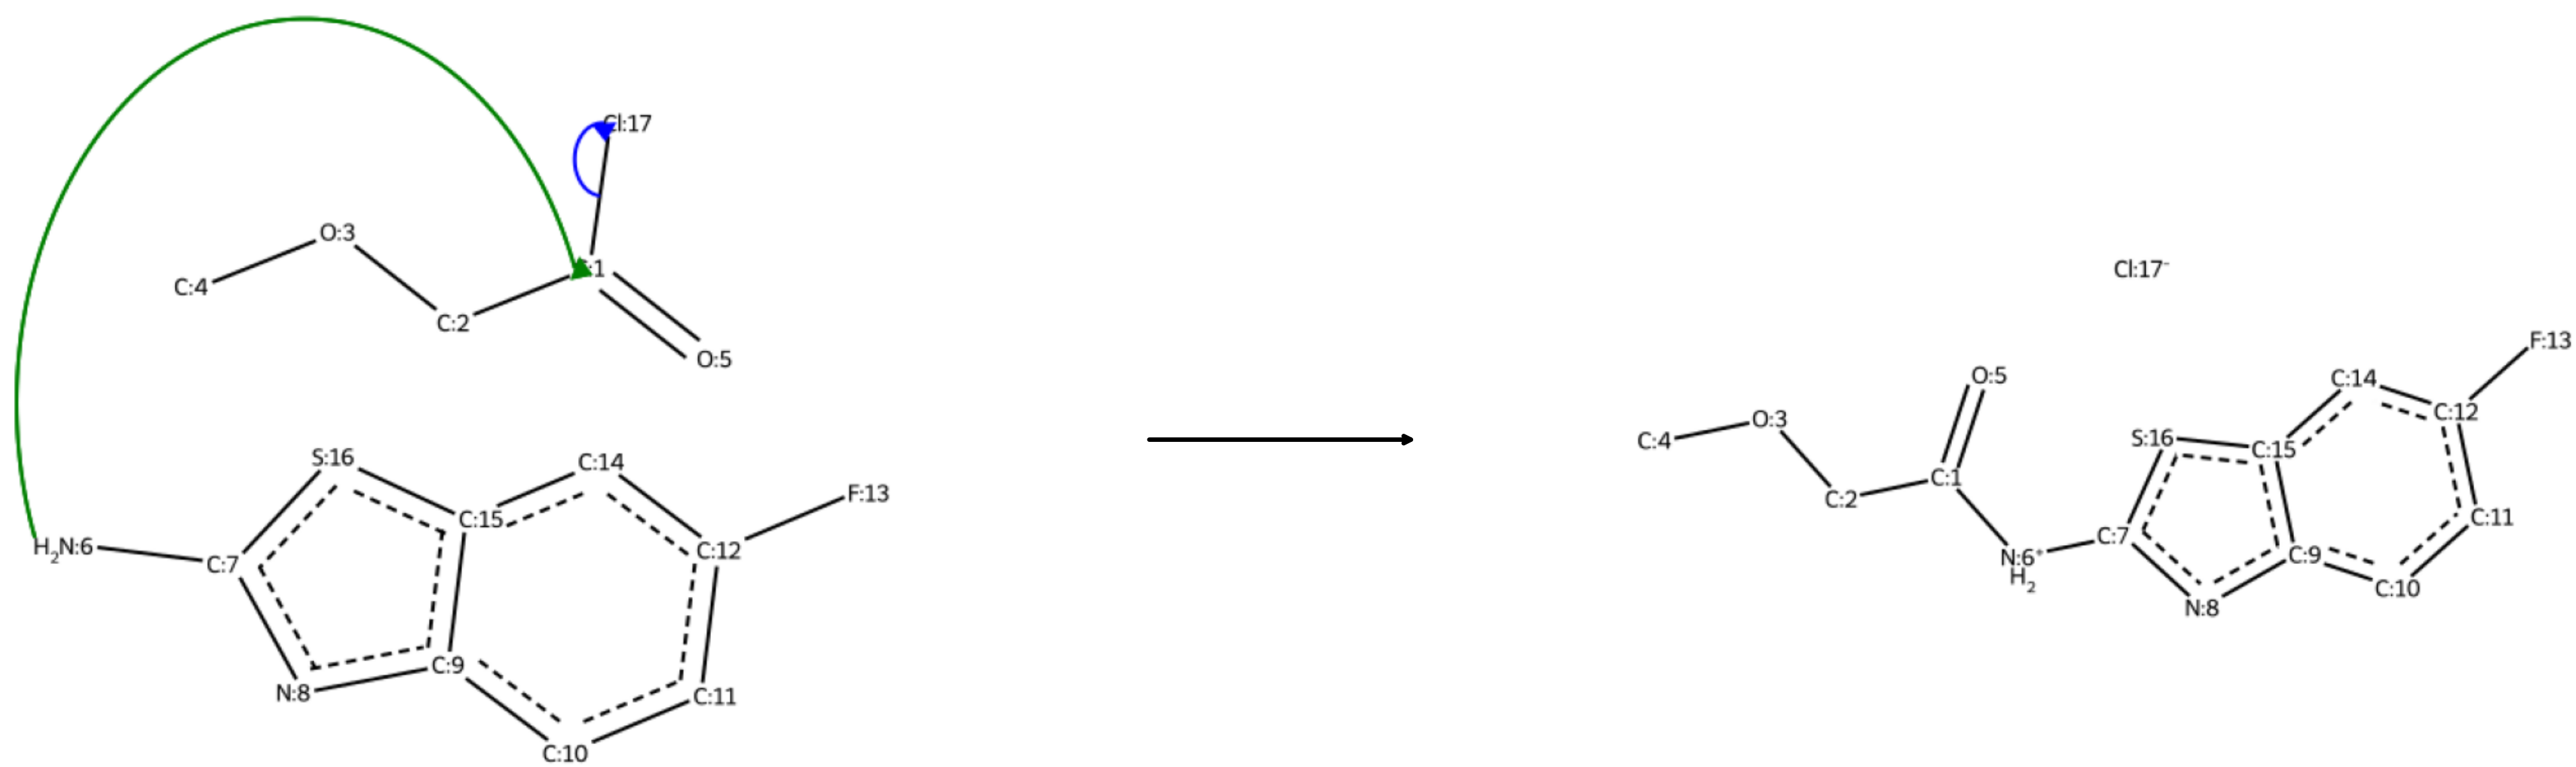



# Original reaction RXN\_ID:28

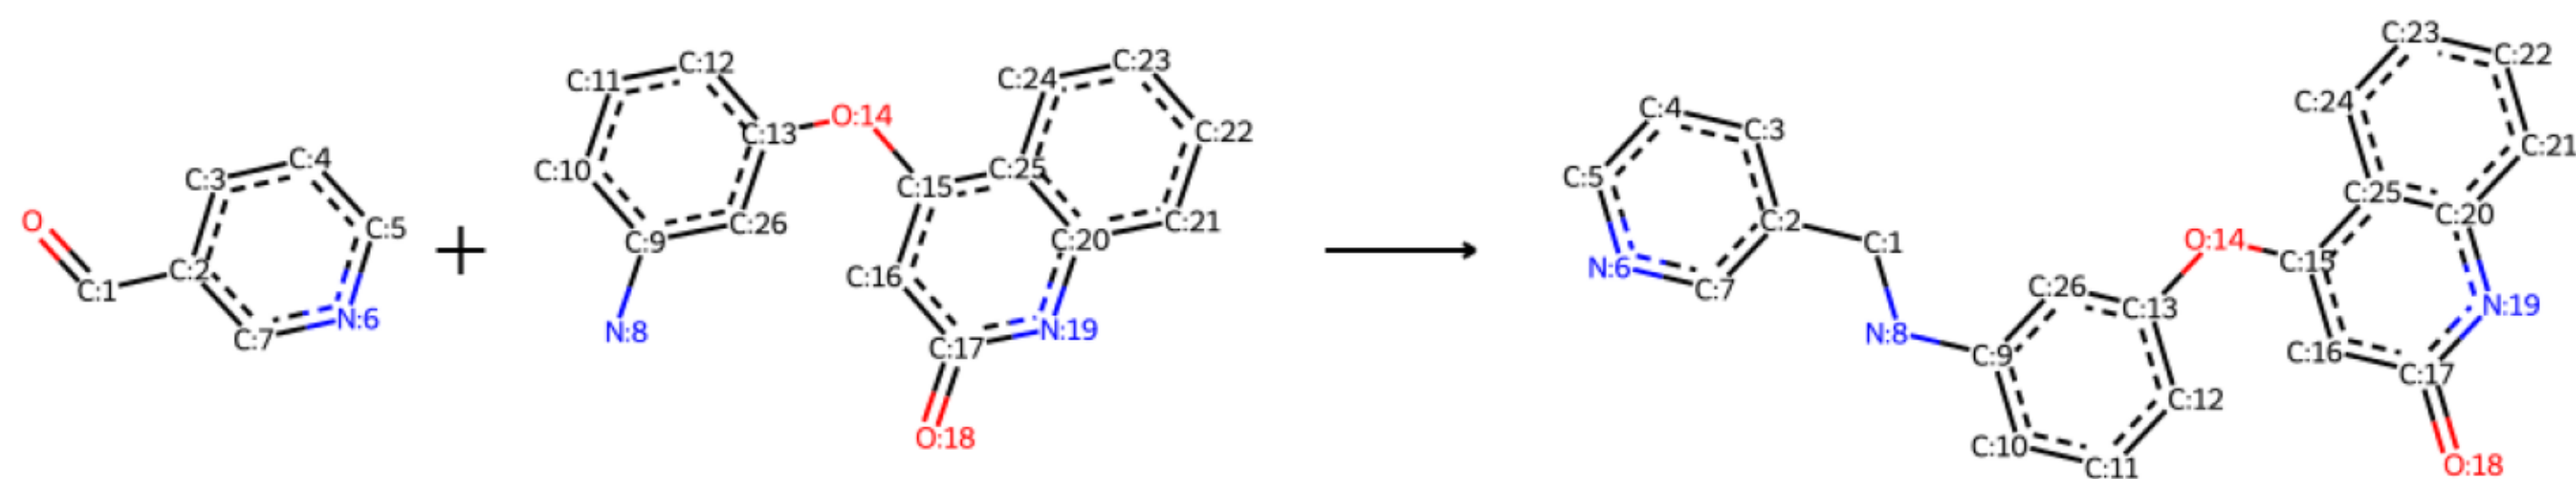

## ELECTRO-generated mechanistic pathway

[Arrow order: (1) green, (2) blue, (3) red, (4) orange]

step #1

Product(s)

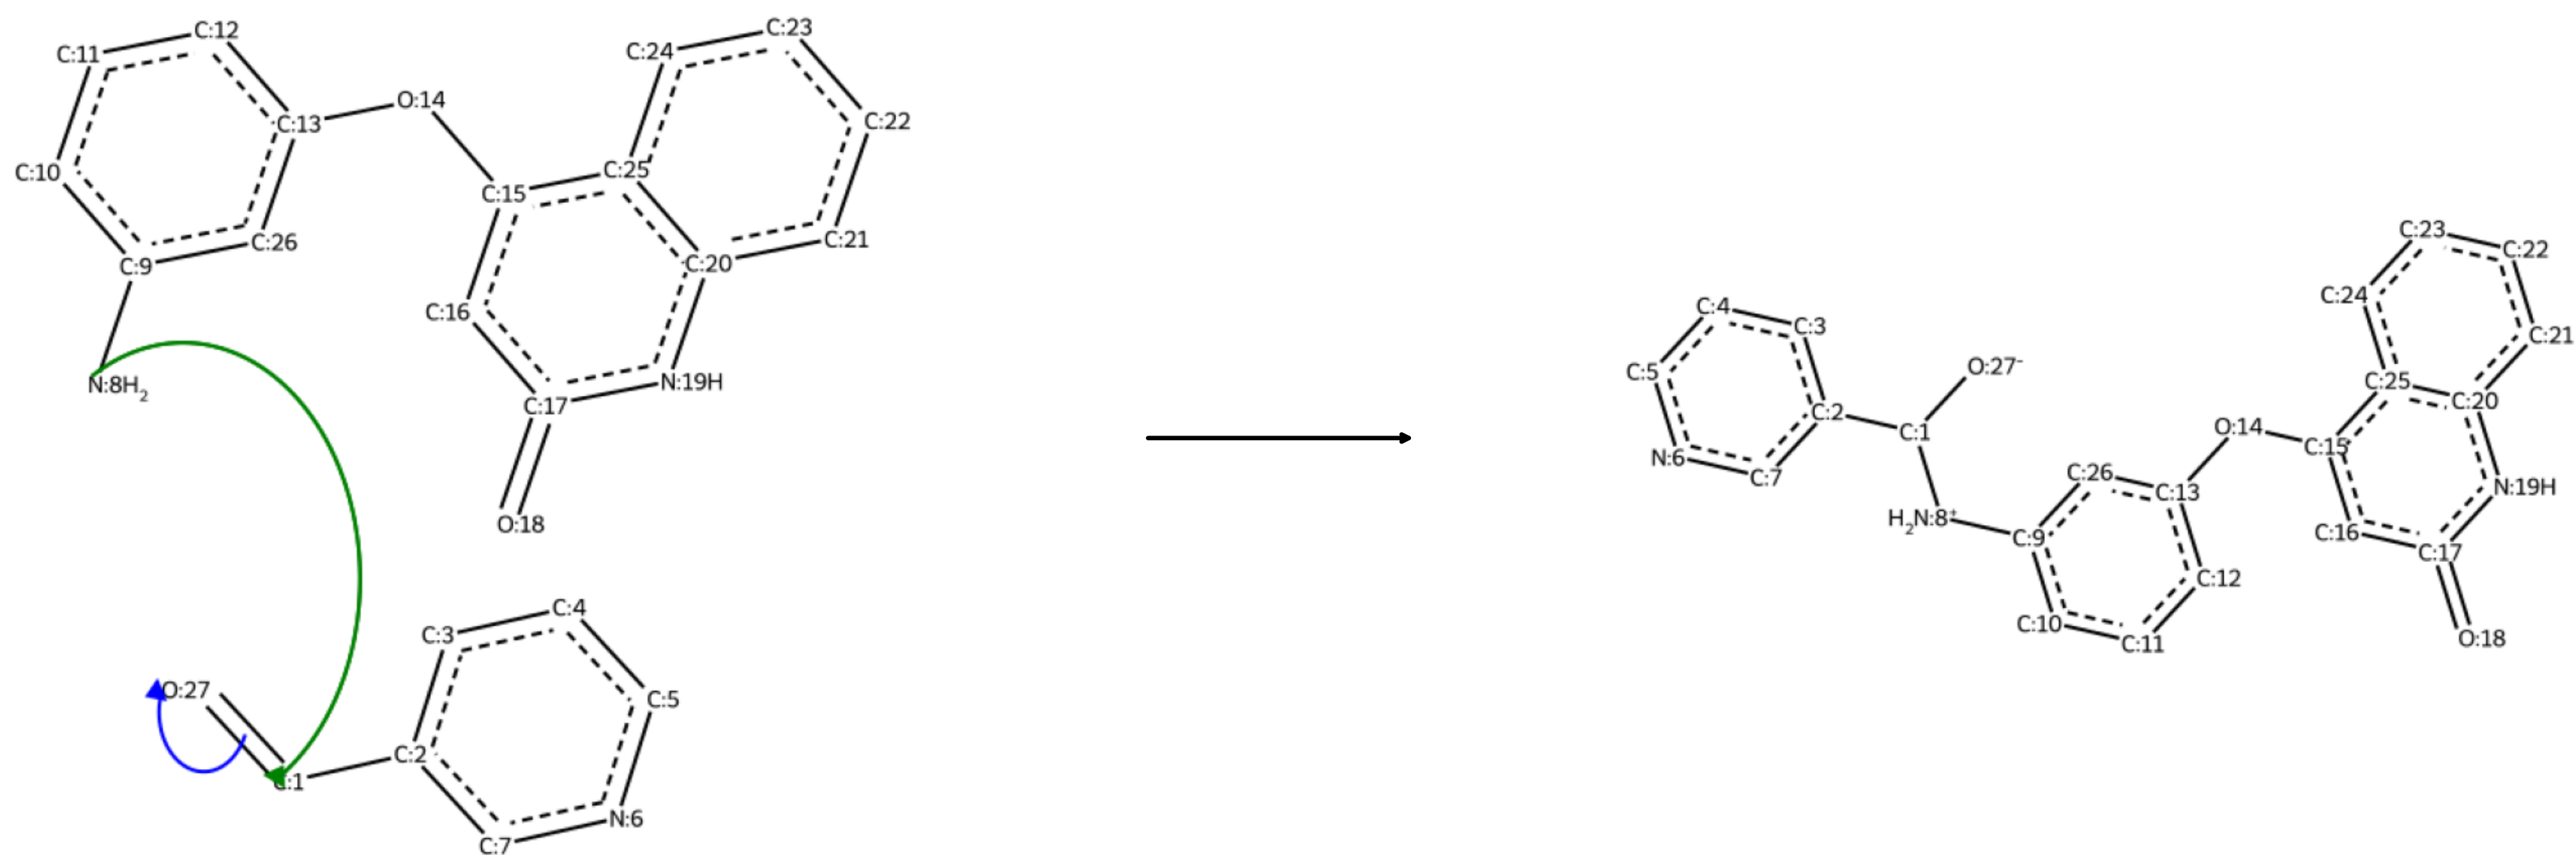

# Original reaction RXN\_ID:29

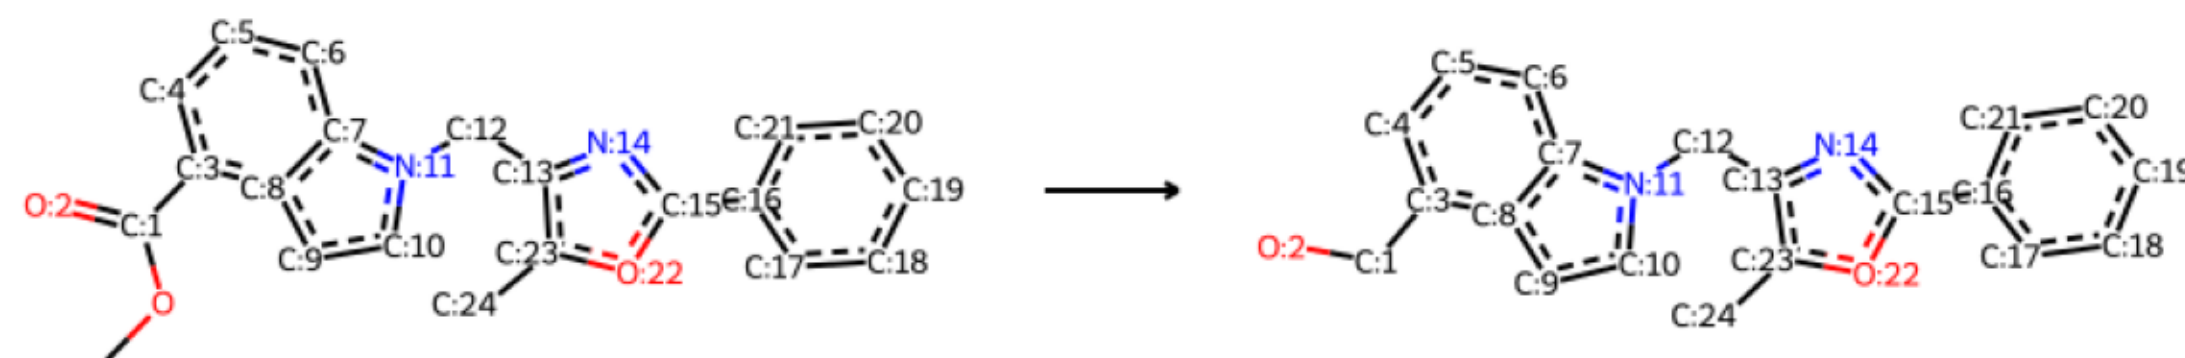

## ELECTRO-generated mechanistic pathway

[Arrow order: (1) green, (2) blue, (3) red, (4) orange]

step #1

Product(s)

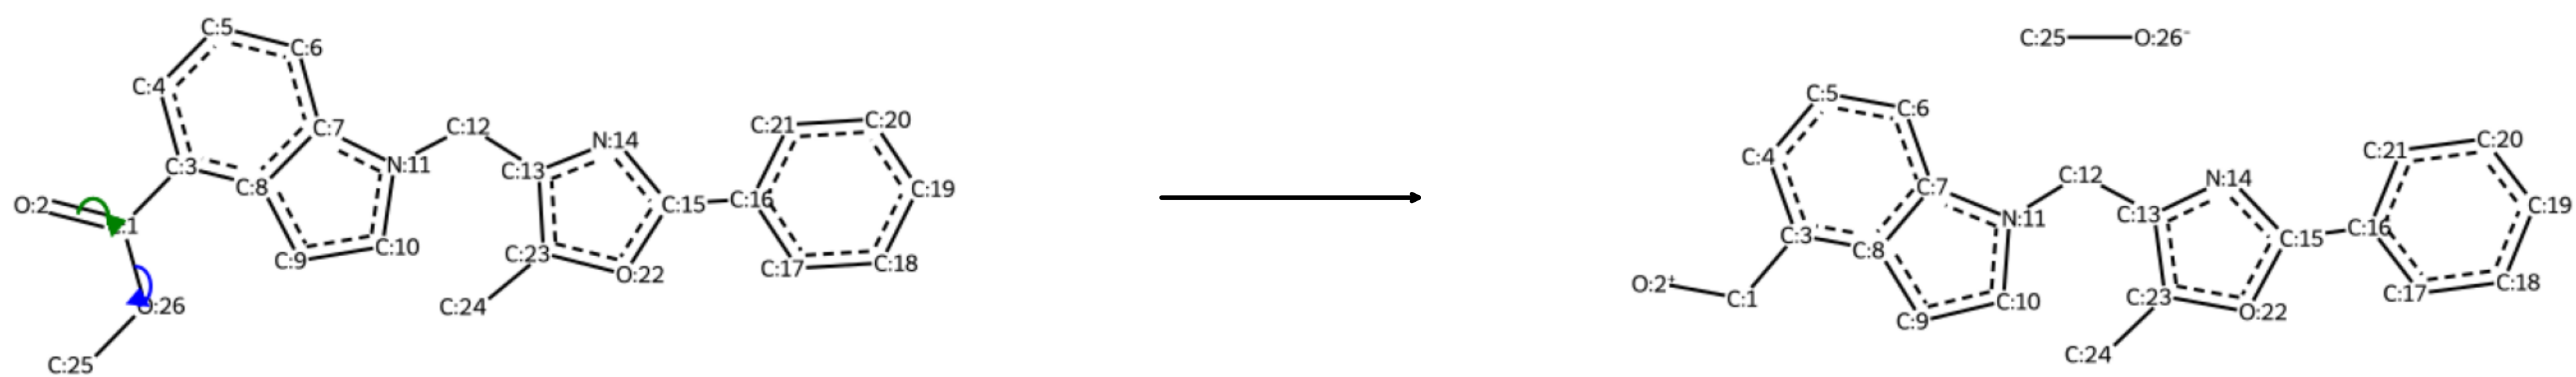



# Original reaction RXN\_ID:30

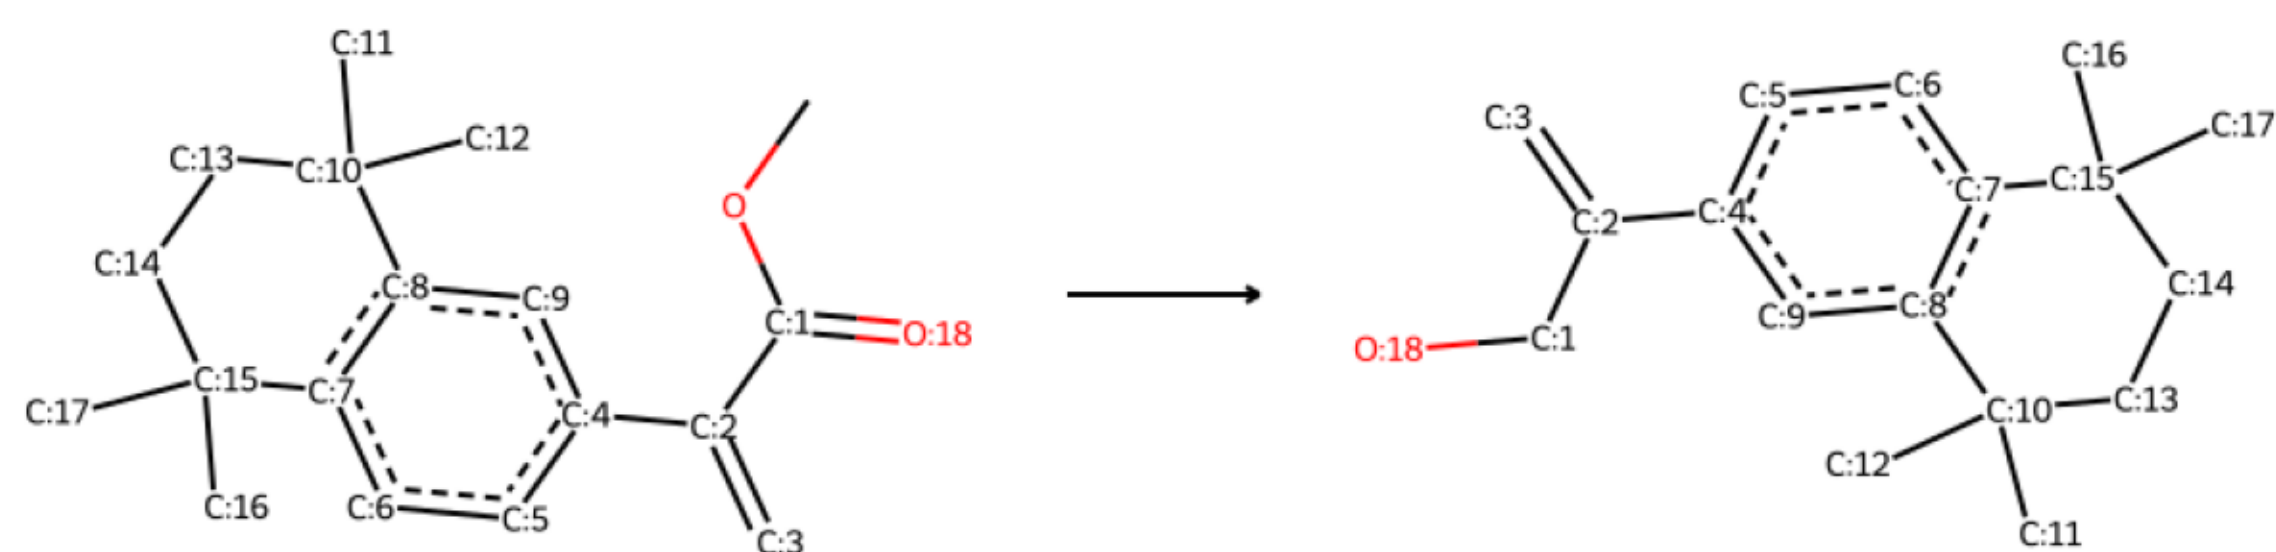

## ELECTRO-generated mechanistic pathway

[Arrow order: (1) green, (2) blue, (3) red, (4) orange]

step #1

Product(s)

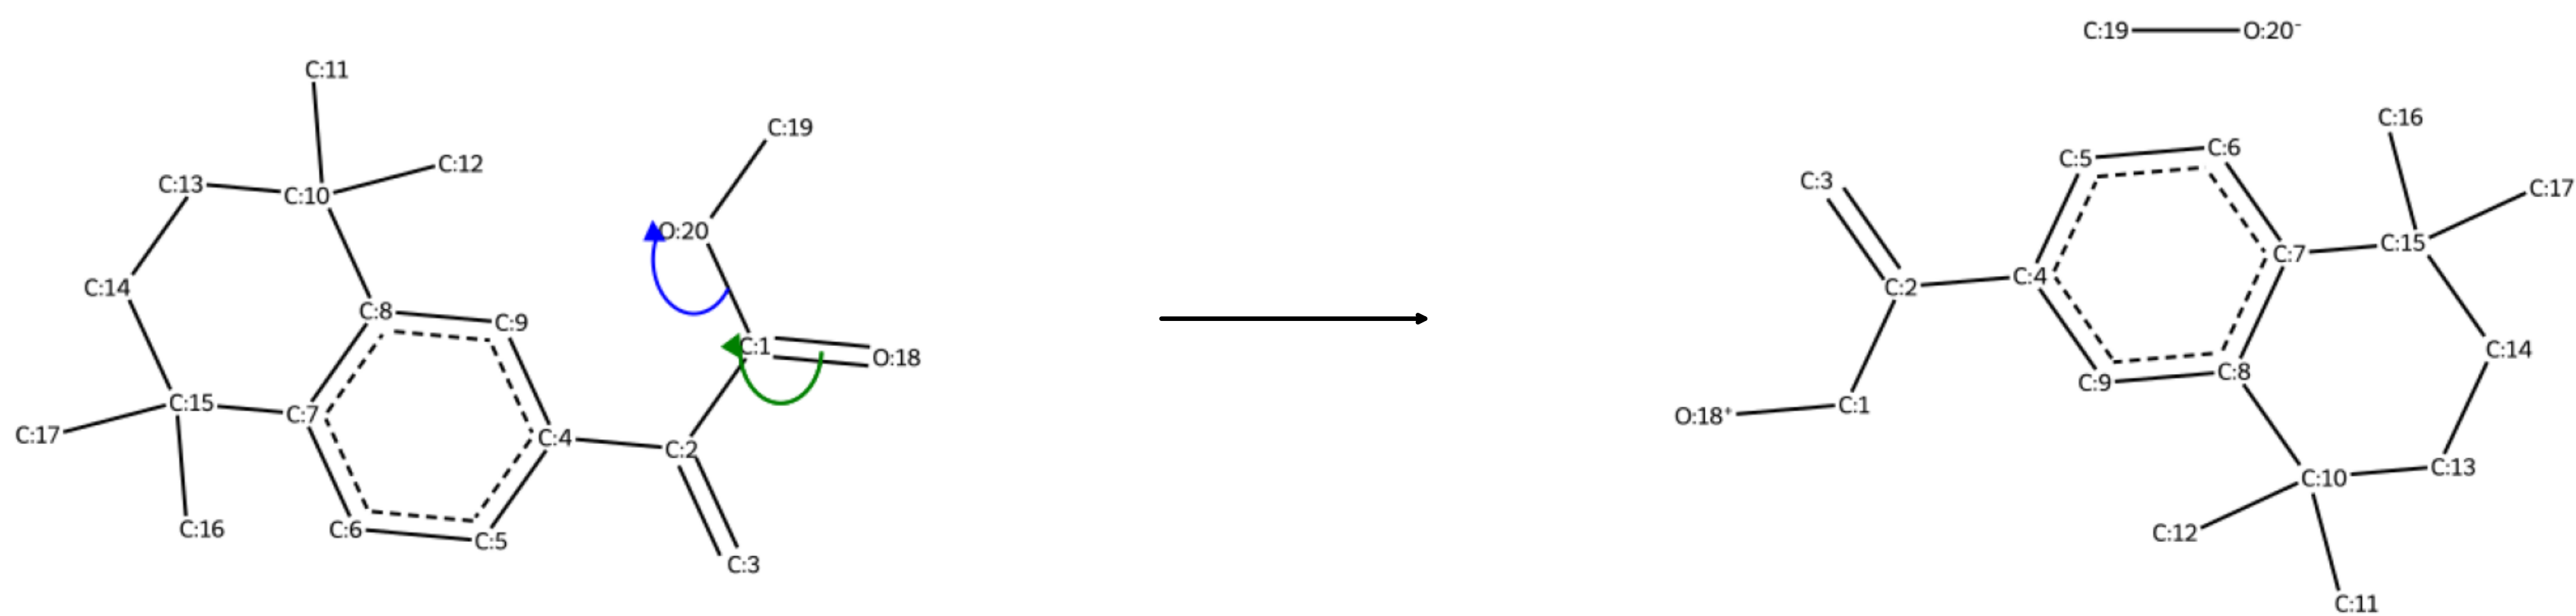

# Original reaction RXN\_ID:31

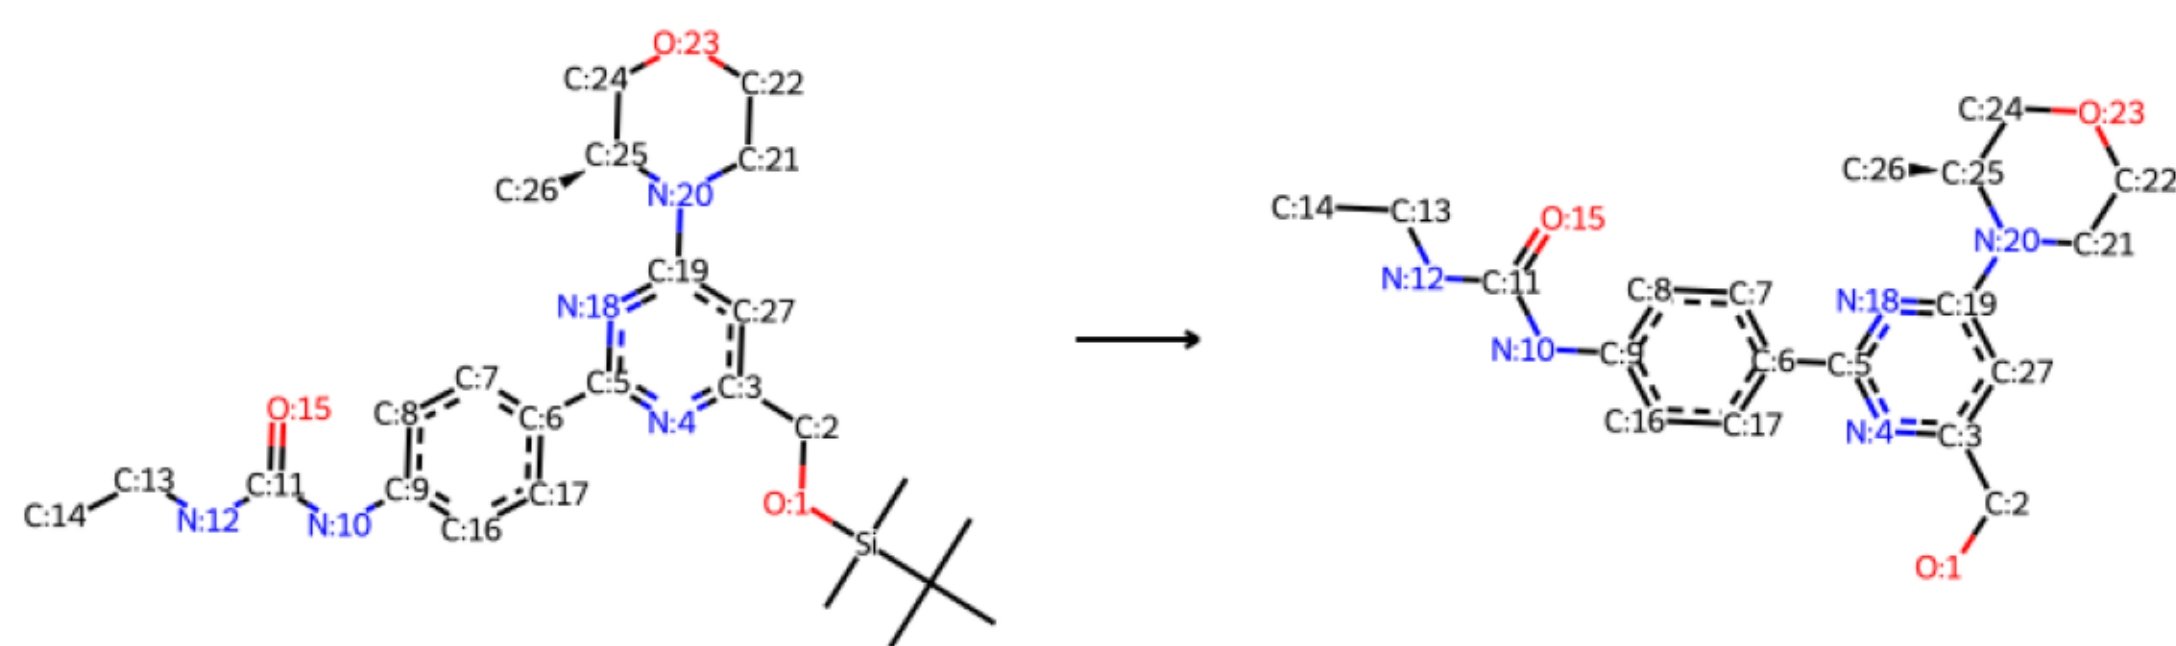

## ELECTRO-generated mechanistic pathway

[Arrow order: (1) green, (2) blue, (3) red, (4) orange]

step #1

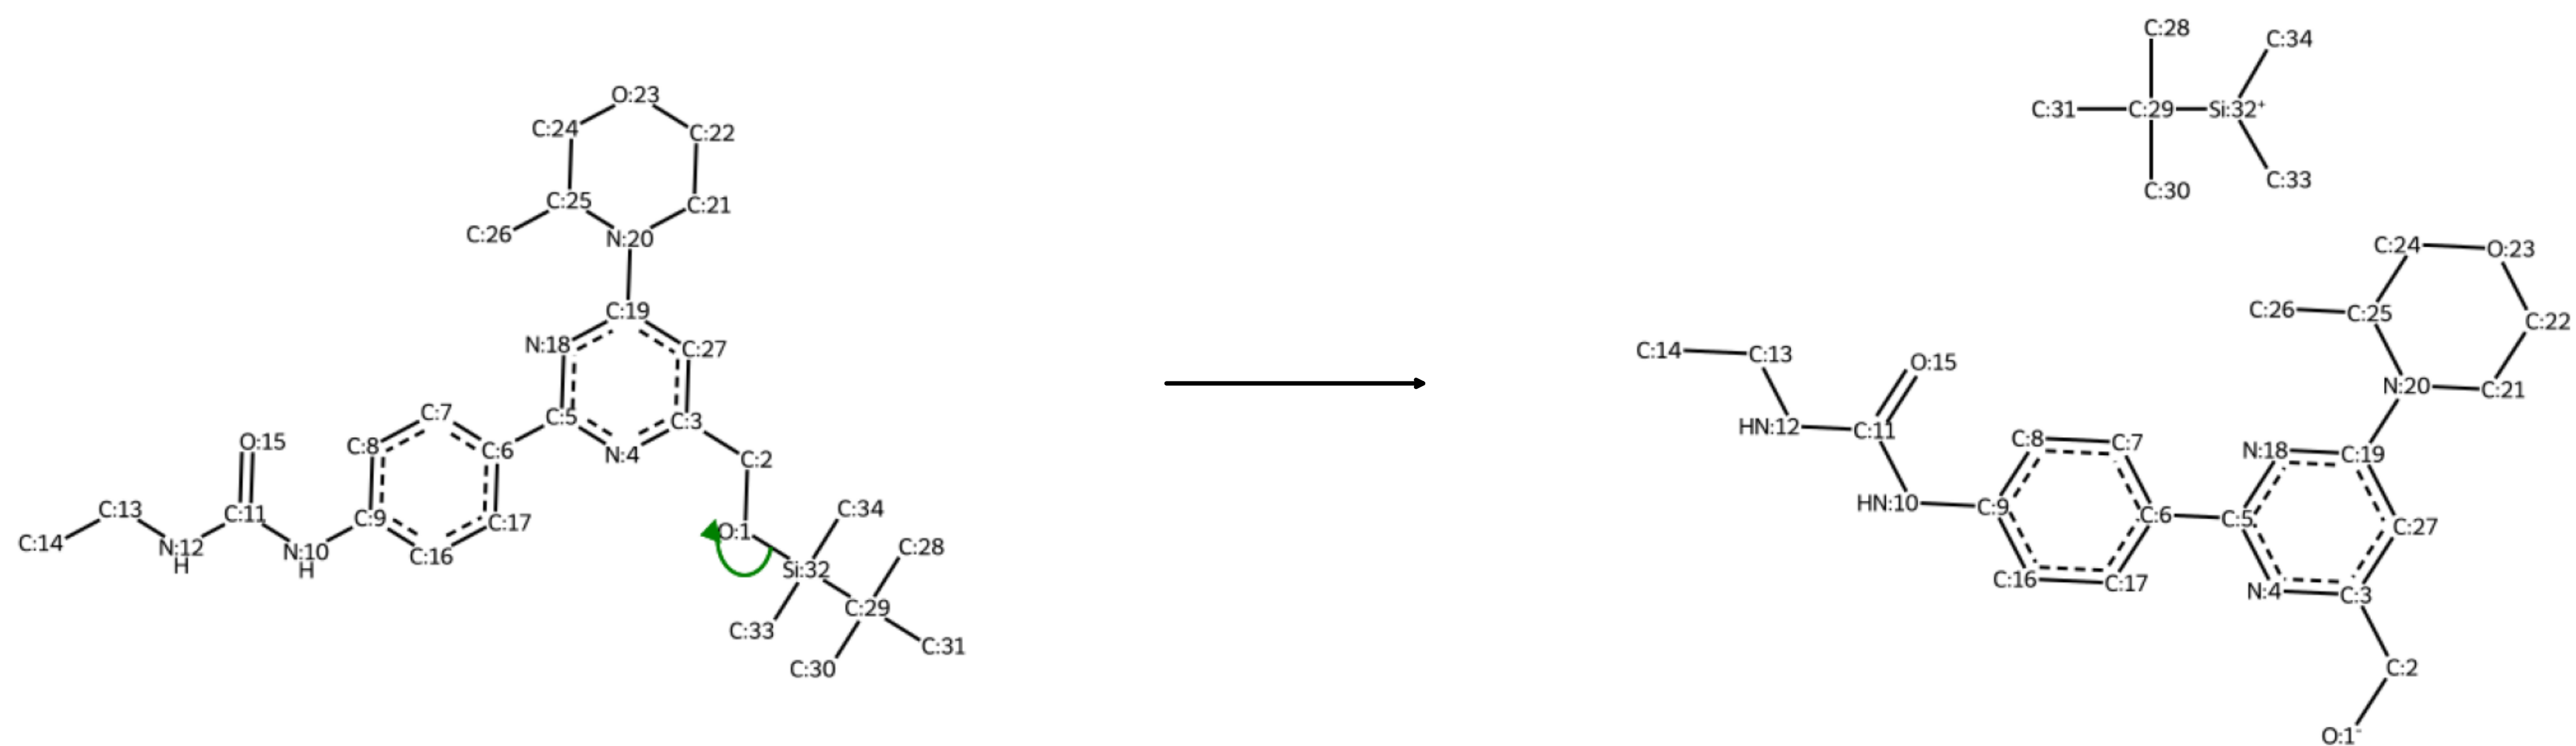



# Original reaction RXN\_ID:32

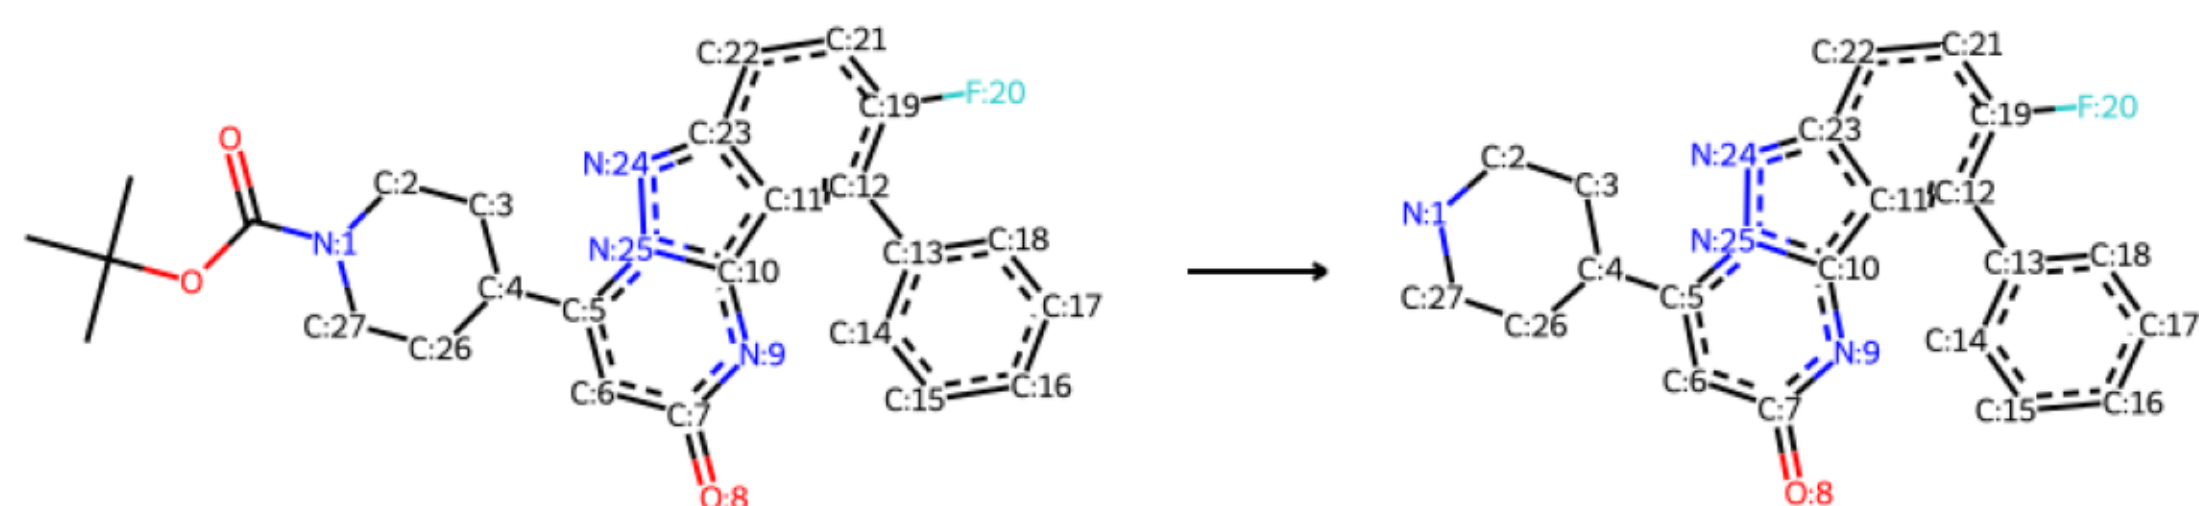

## ELECTRO-generated mechanistic pathway

[Arrow order: (1) green, (2) blue, (3) red, (4) orange]

step #1

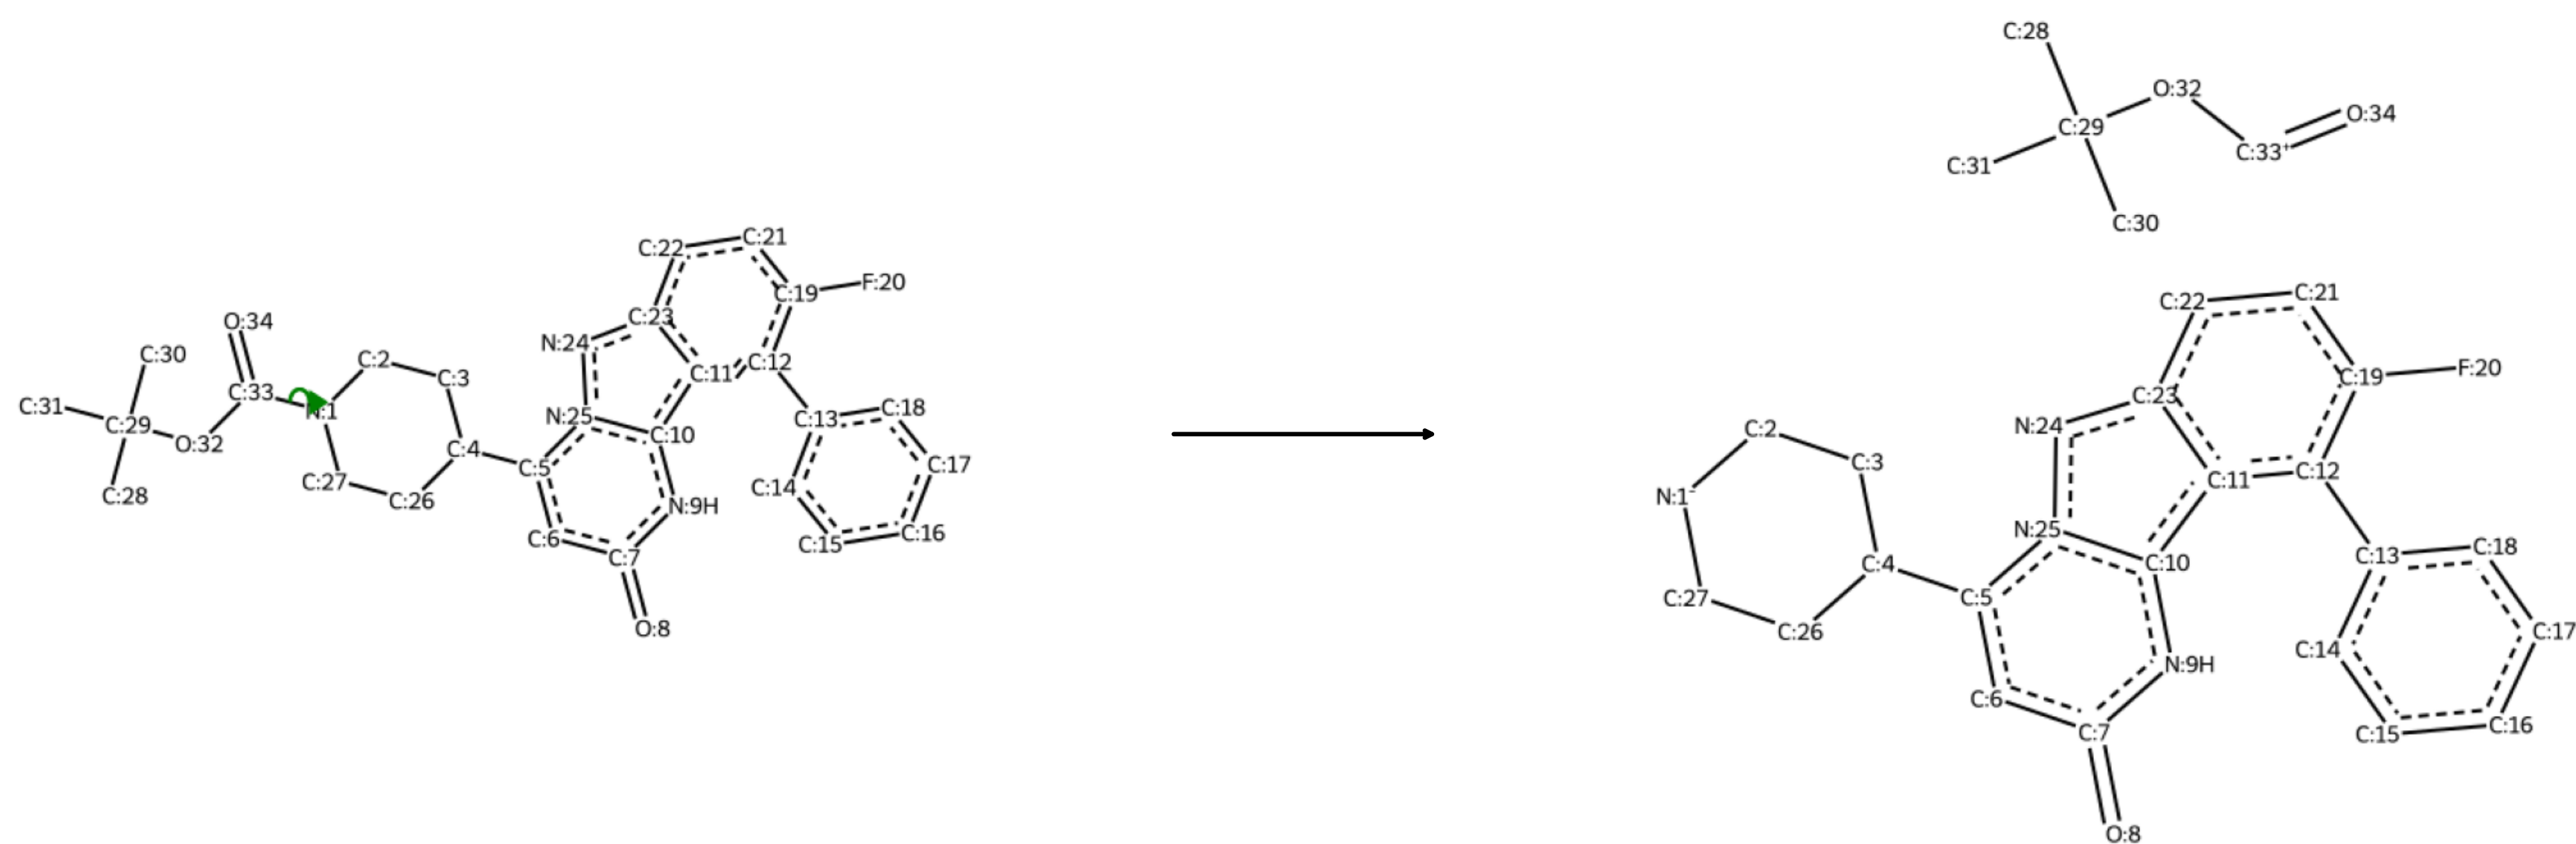

**Product(s)**

# Original reaction RXN\_ID:33

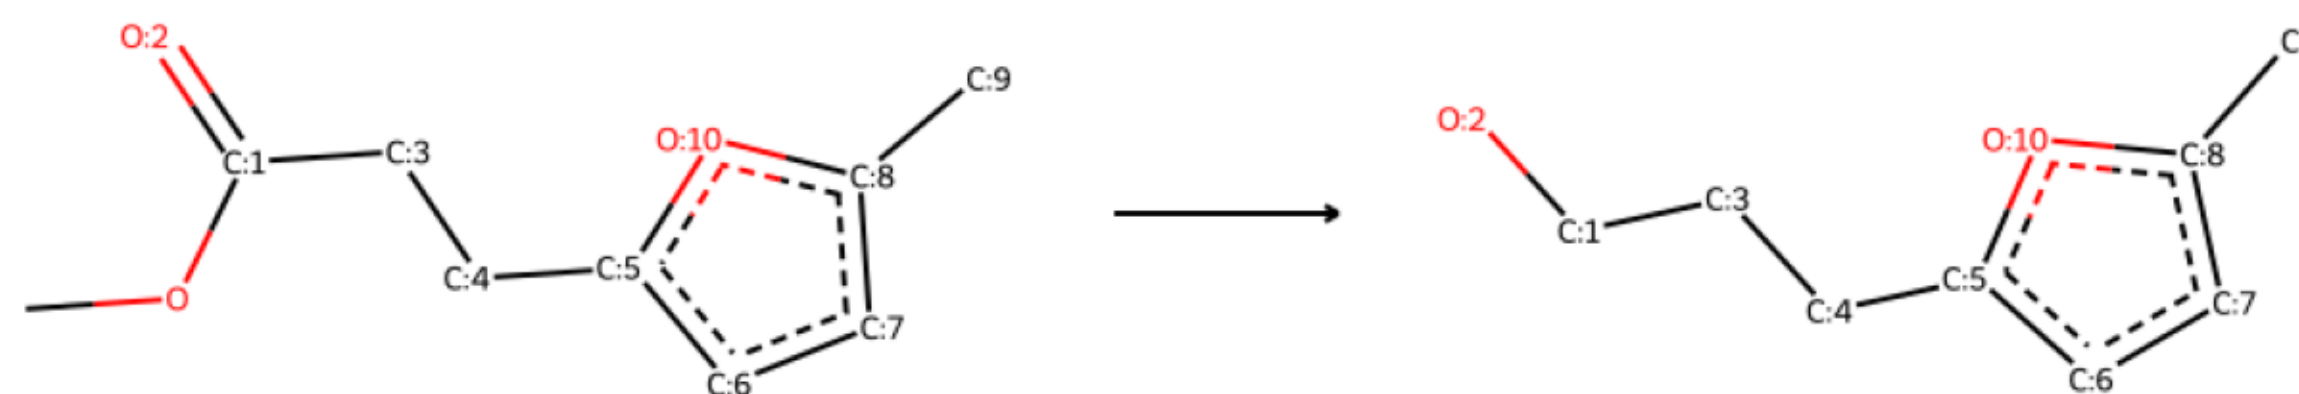

## ELECTRO-generated mechanistic pathway

[Arrow order: (1) green, (2) blue, (3) red, (4) orange]

step #1

**Product(s)**

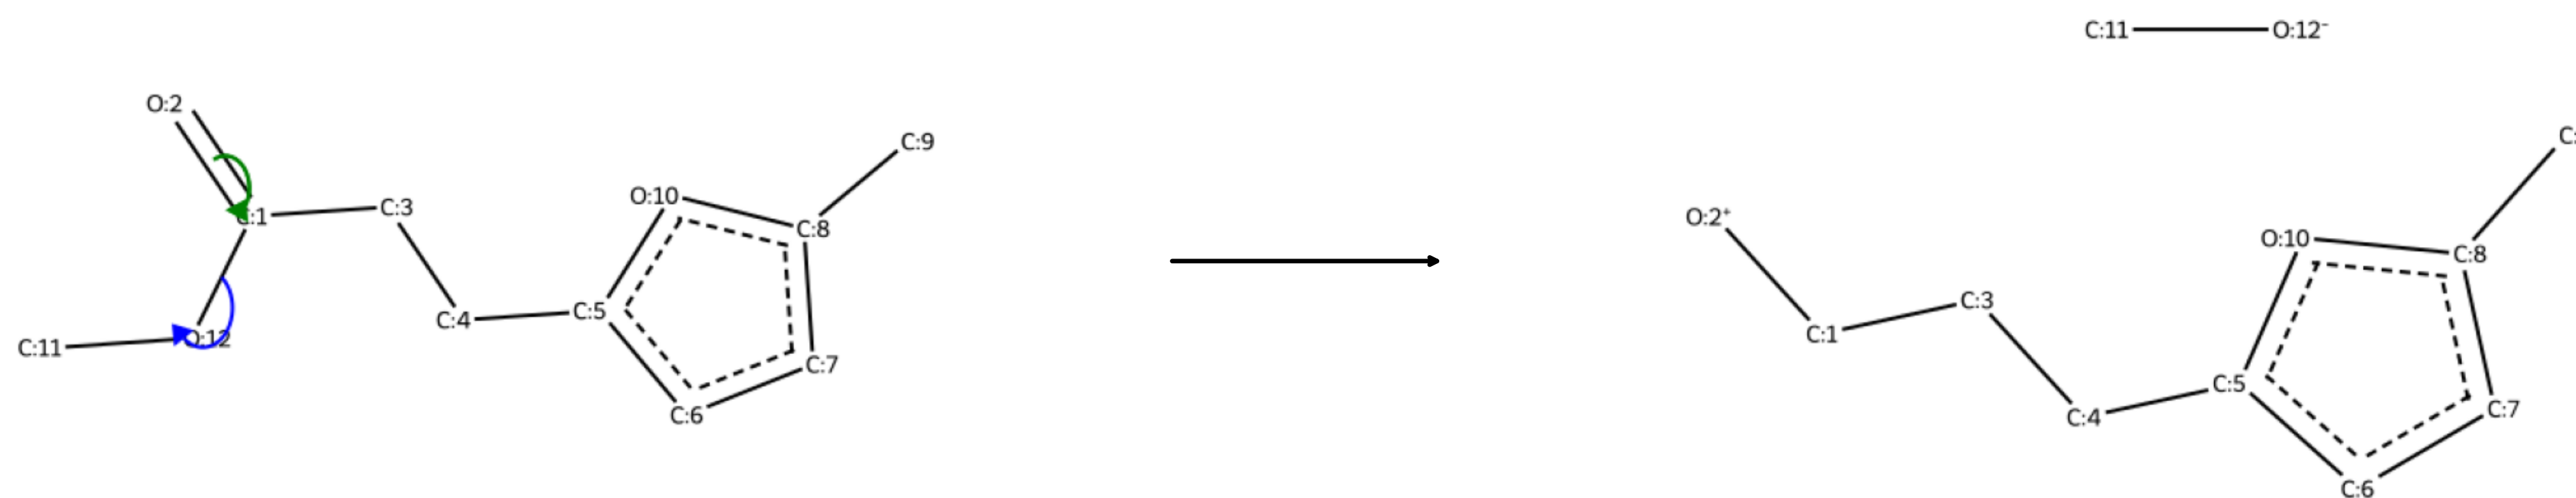



# Original reaction RXN\_ID:34

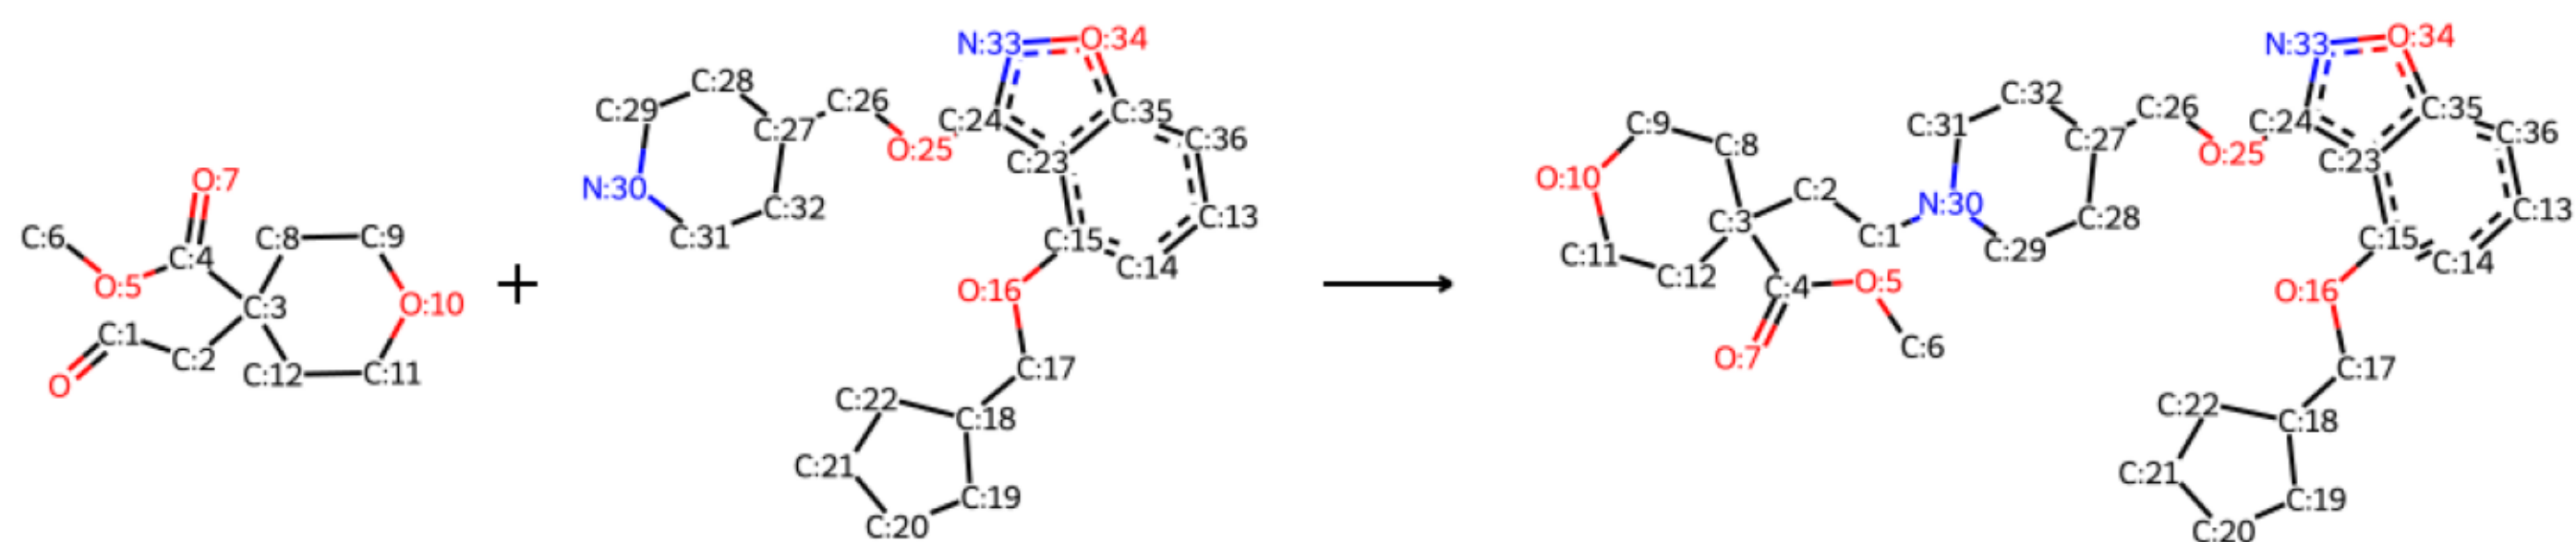

## ELECTRO-generated mechanistic pathway

[Arrow order: (1) green, (2) blue, (3) red, (4) orange]

step #1

Product(s)

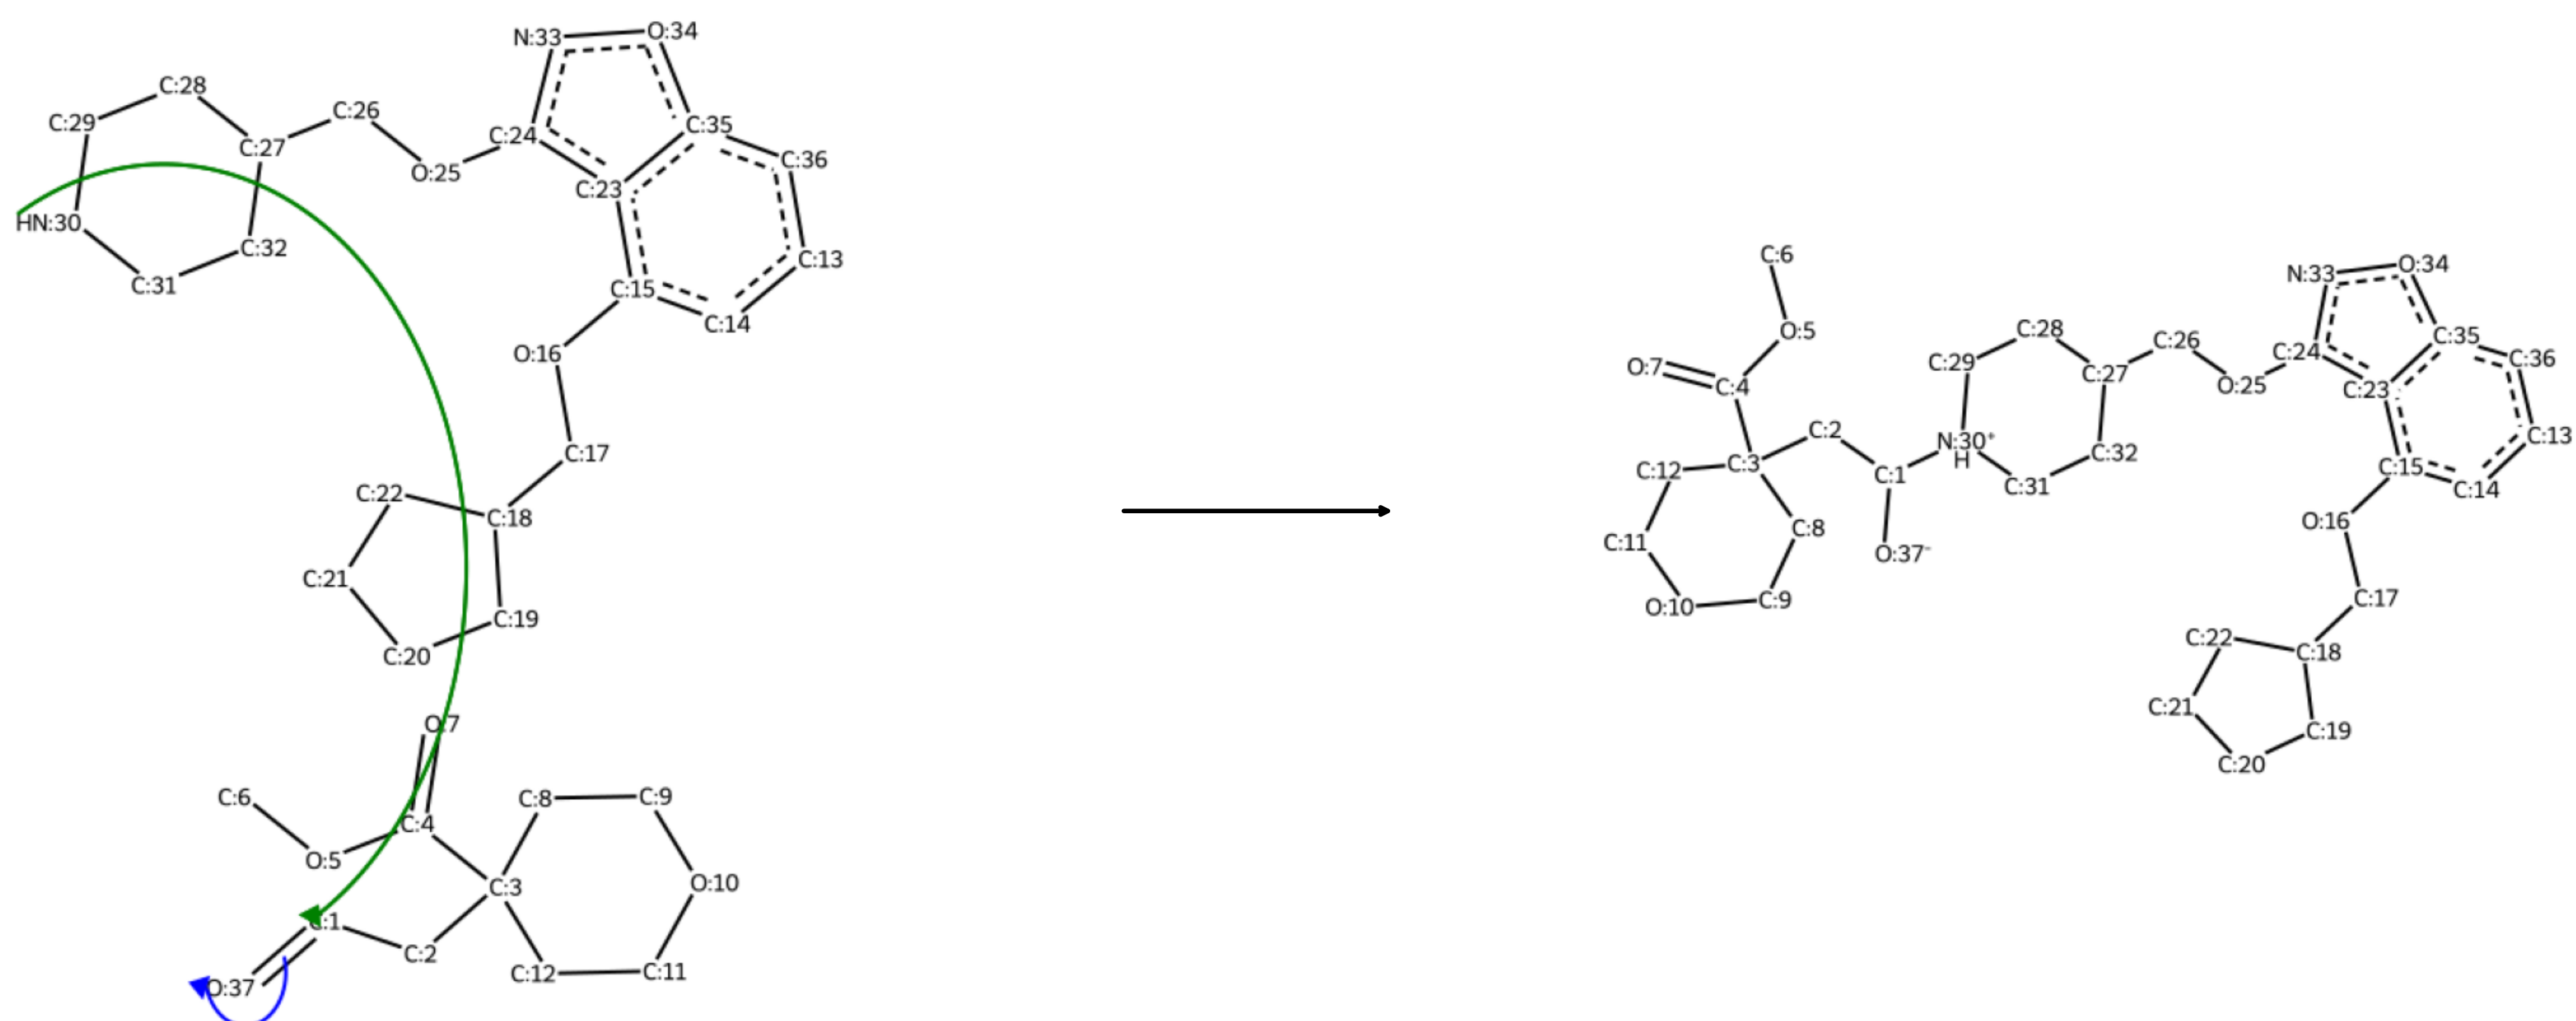

# Original reaction RXN\_ID:35

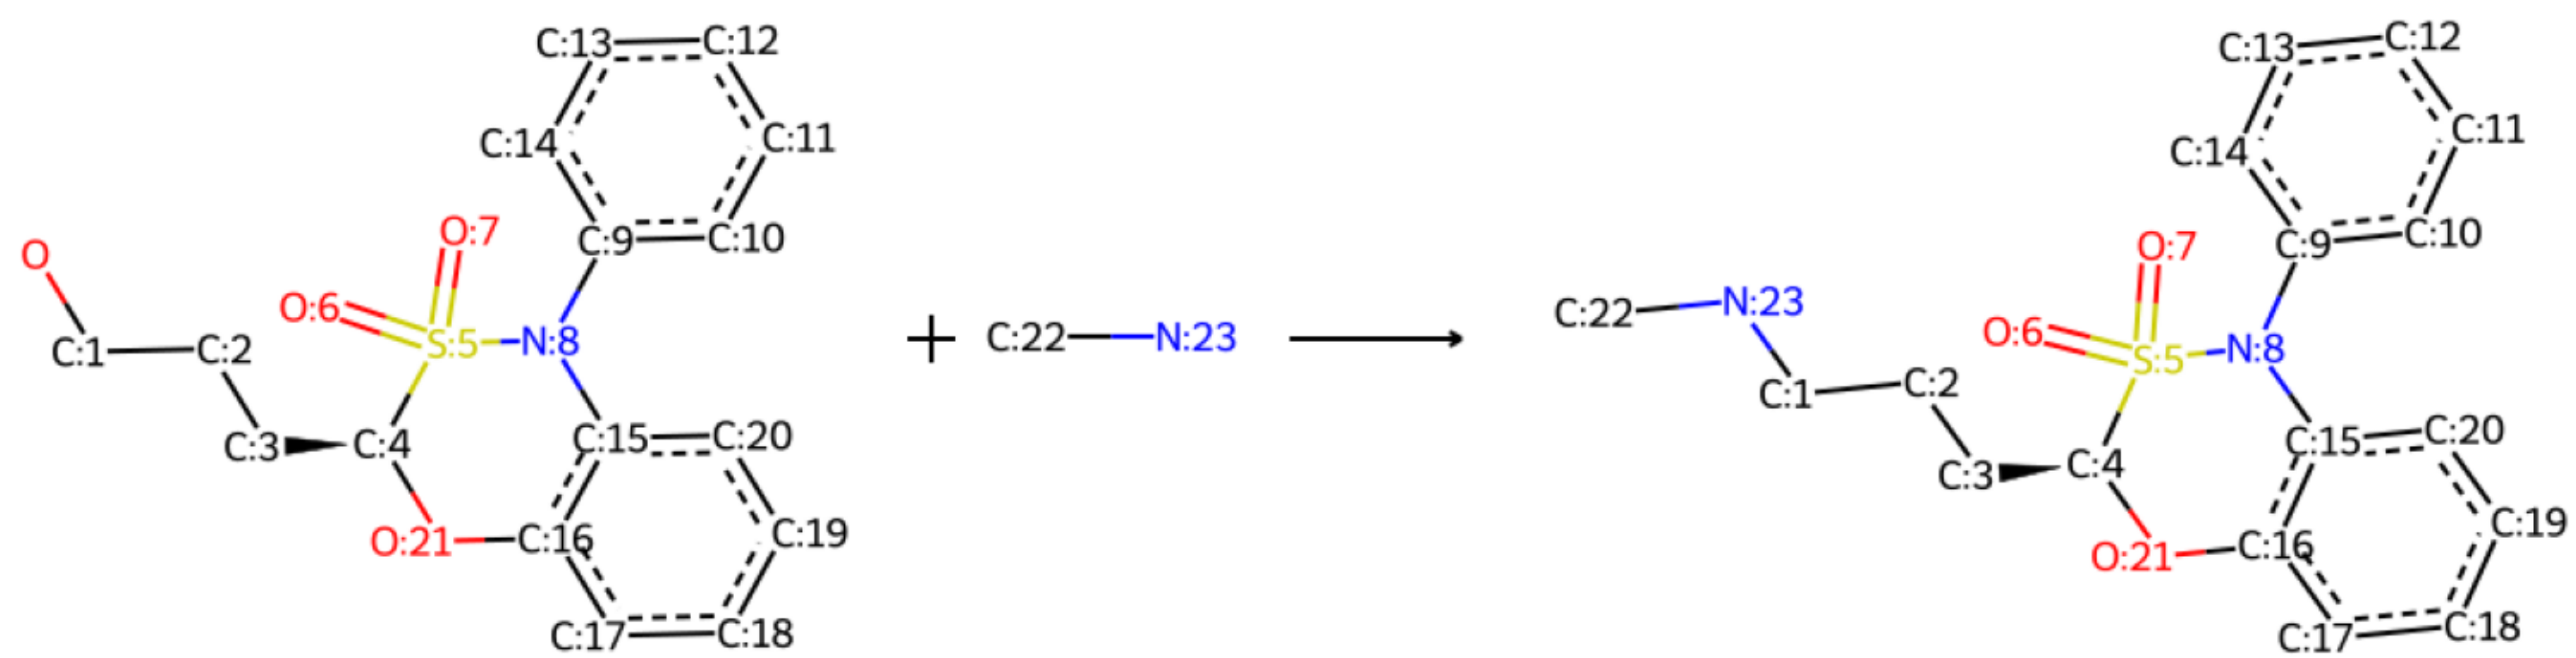

## ELECTRO-generated mechanistic pathway

[Arrow order: (1) green, (2) blue, (3) red, (4) orange]

step #1

Product(s)

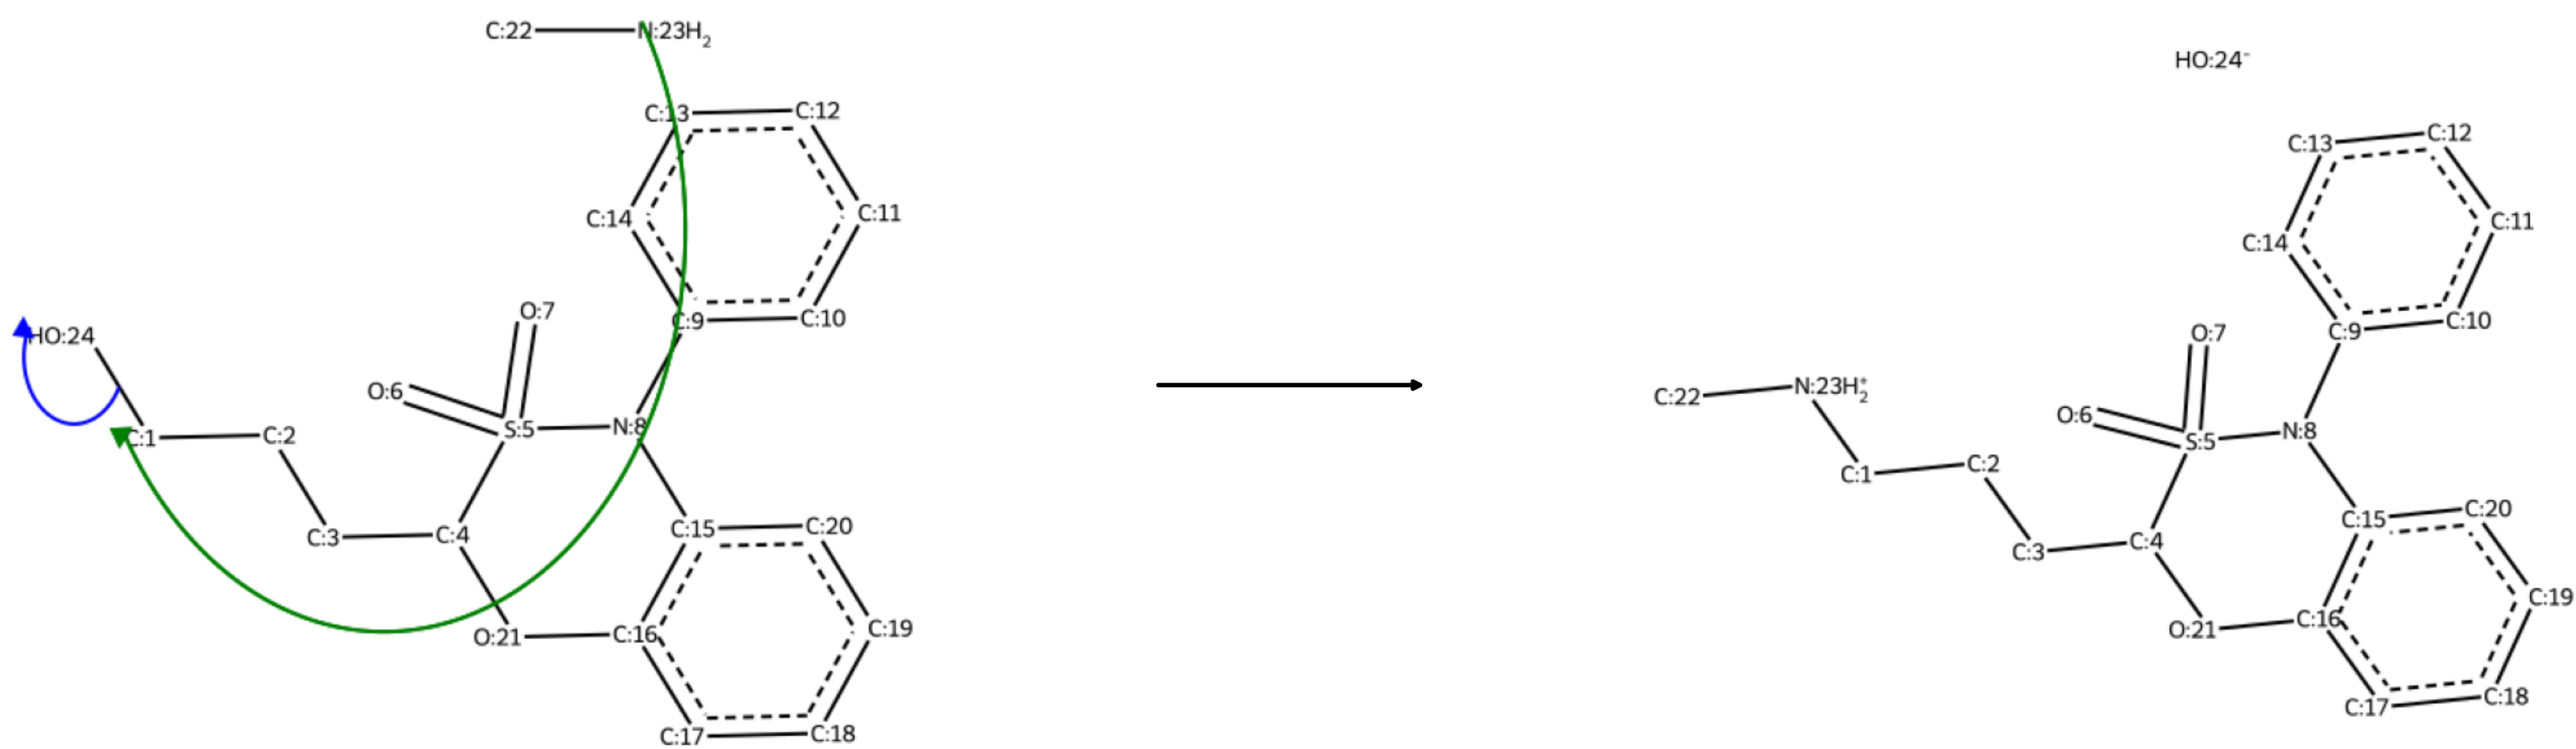



# Original reaction RXN\_ID:36

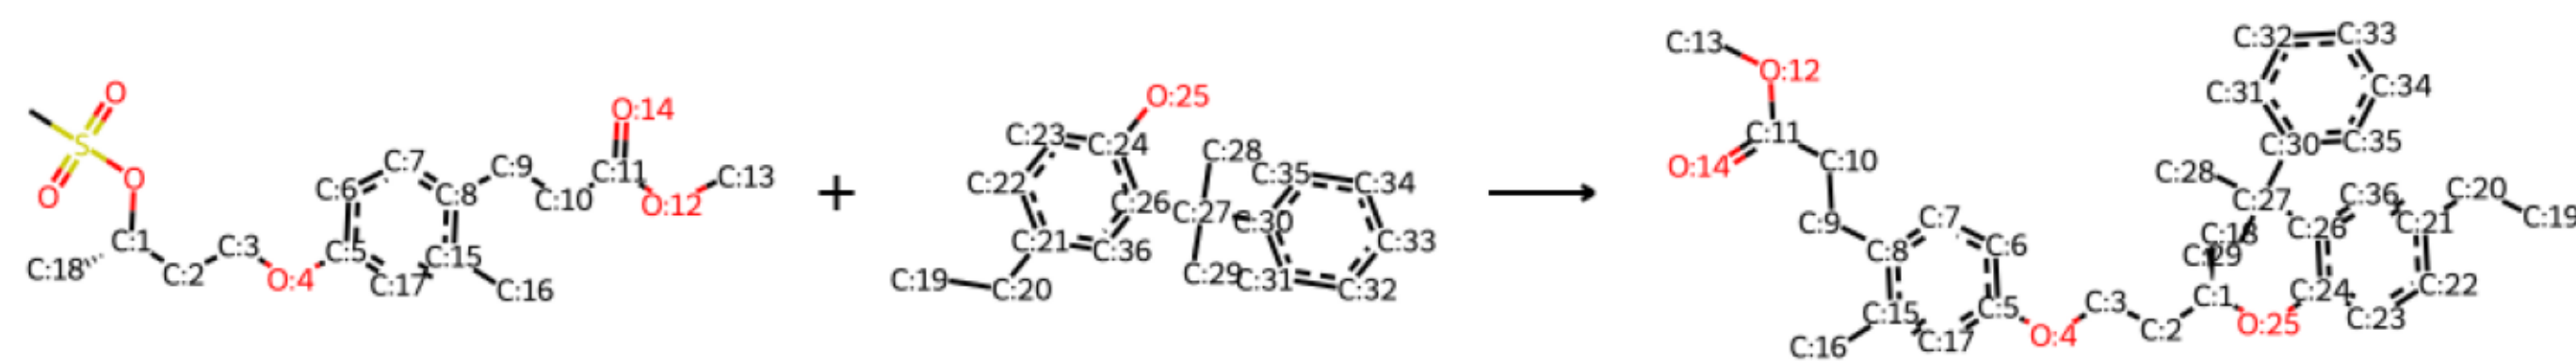

## ELECTRO-generated mechanistic pathway

[Arrow order: (1) green, (2) blue, (3) red, (4) orange]

step #1

Product(s)

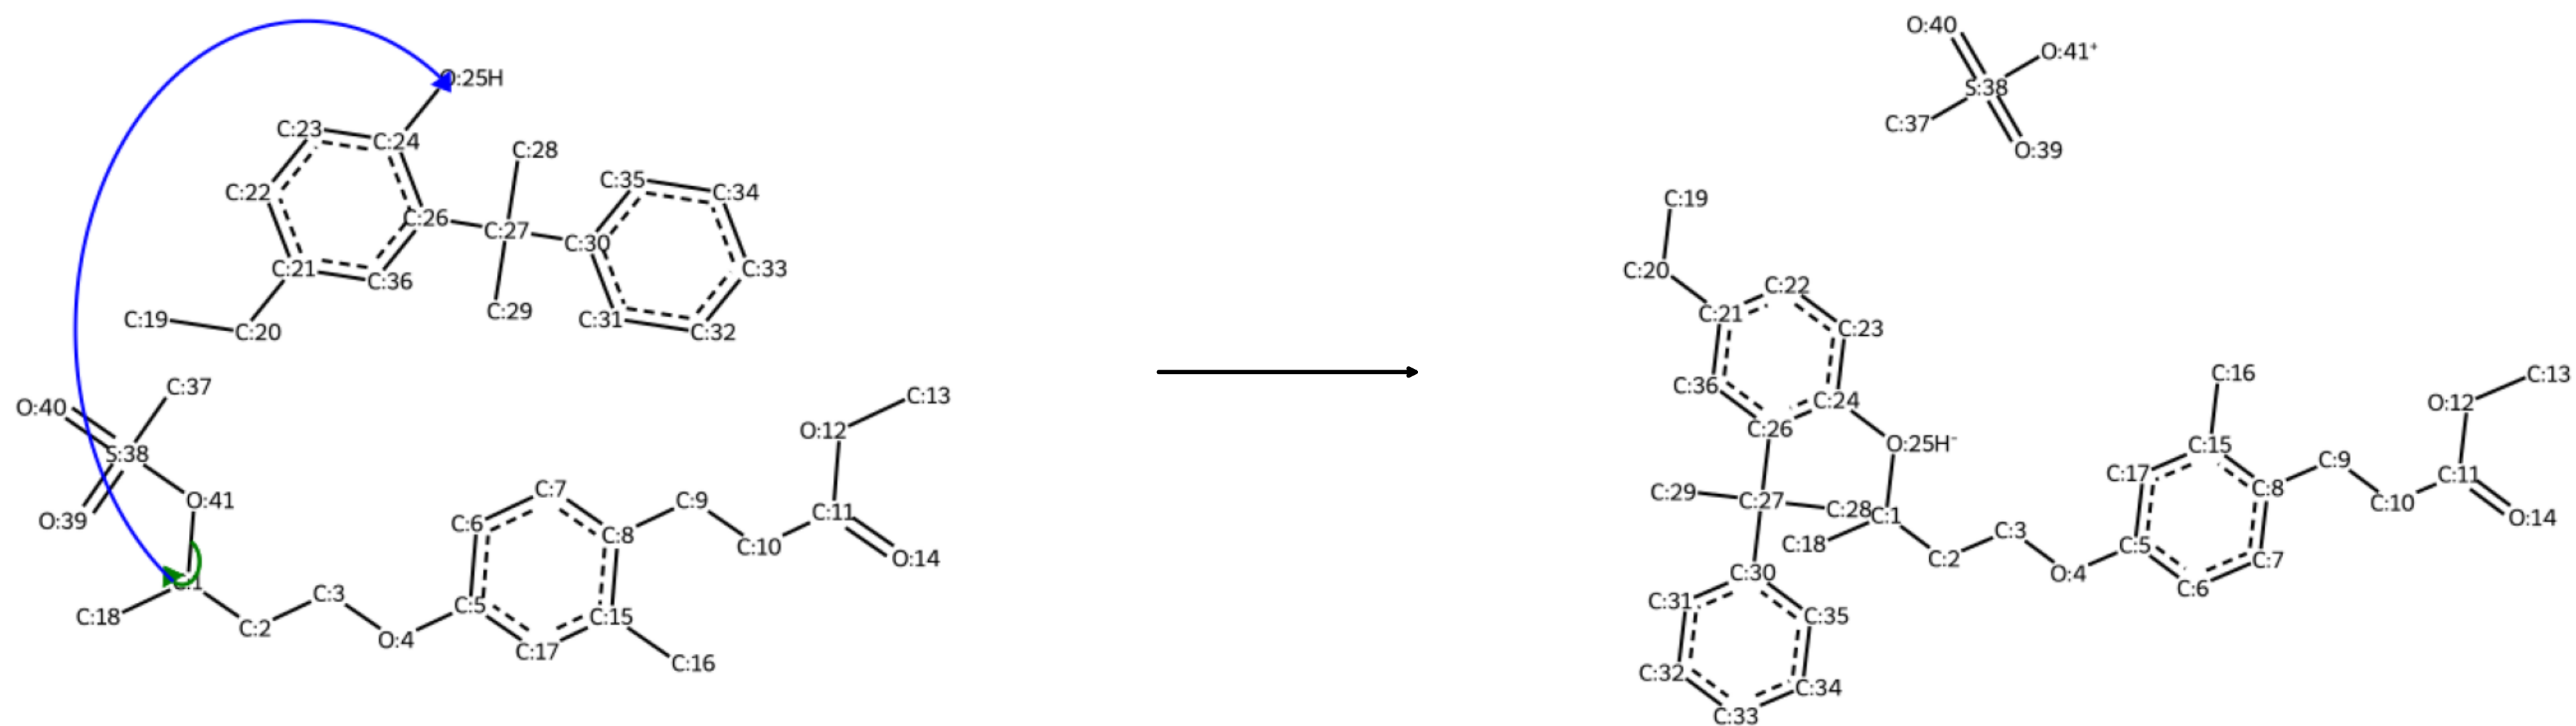

# Original reaction RXN\_ID:37

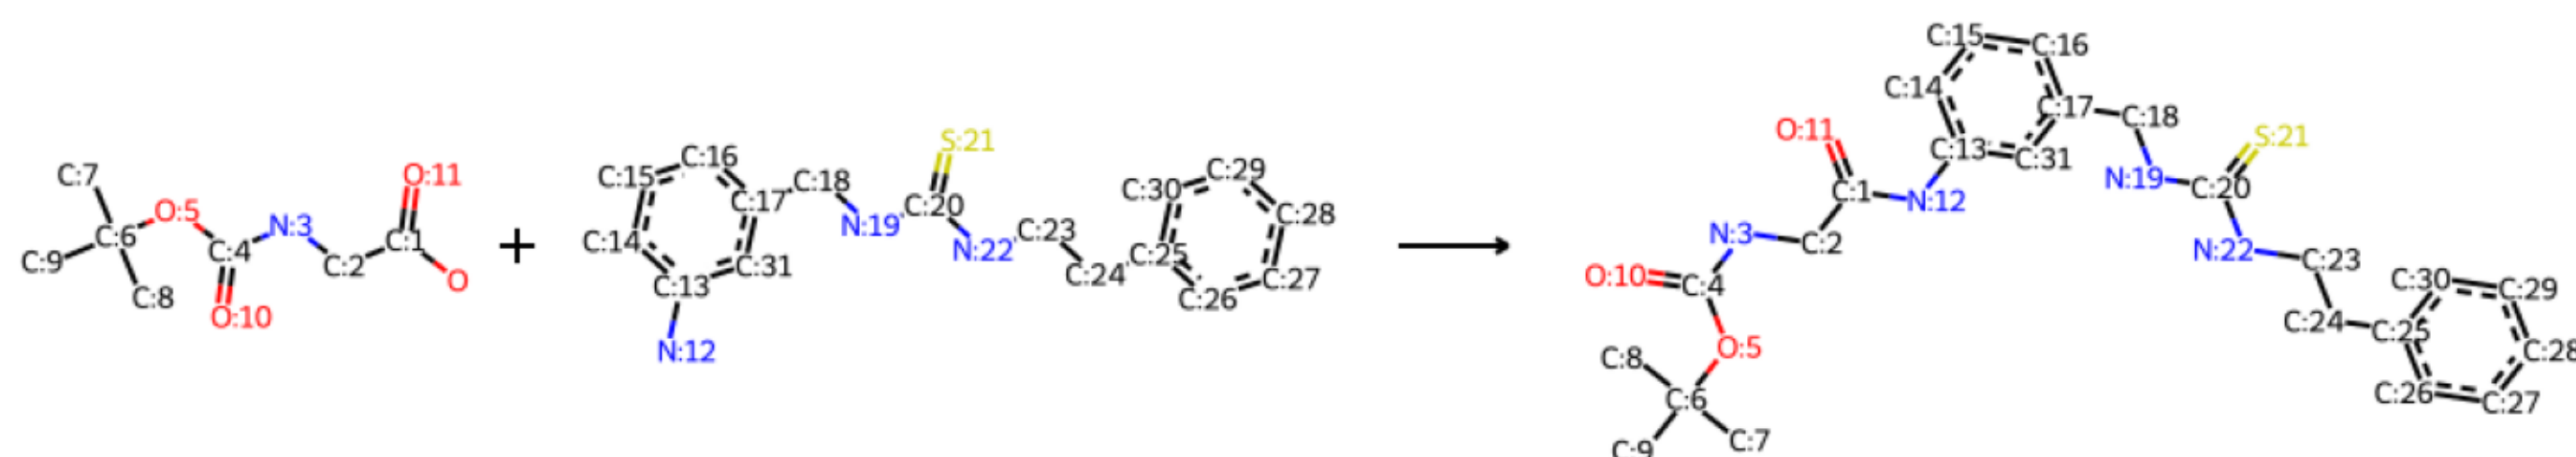

## ELECTRO-generated mechanistic pathway

[Arrow order: (1) green, (2) blue, (3) red, (4) orange]

step #1

Product(s)

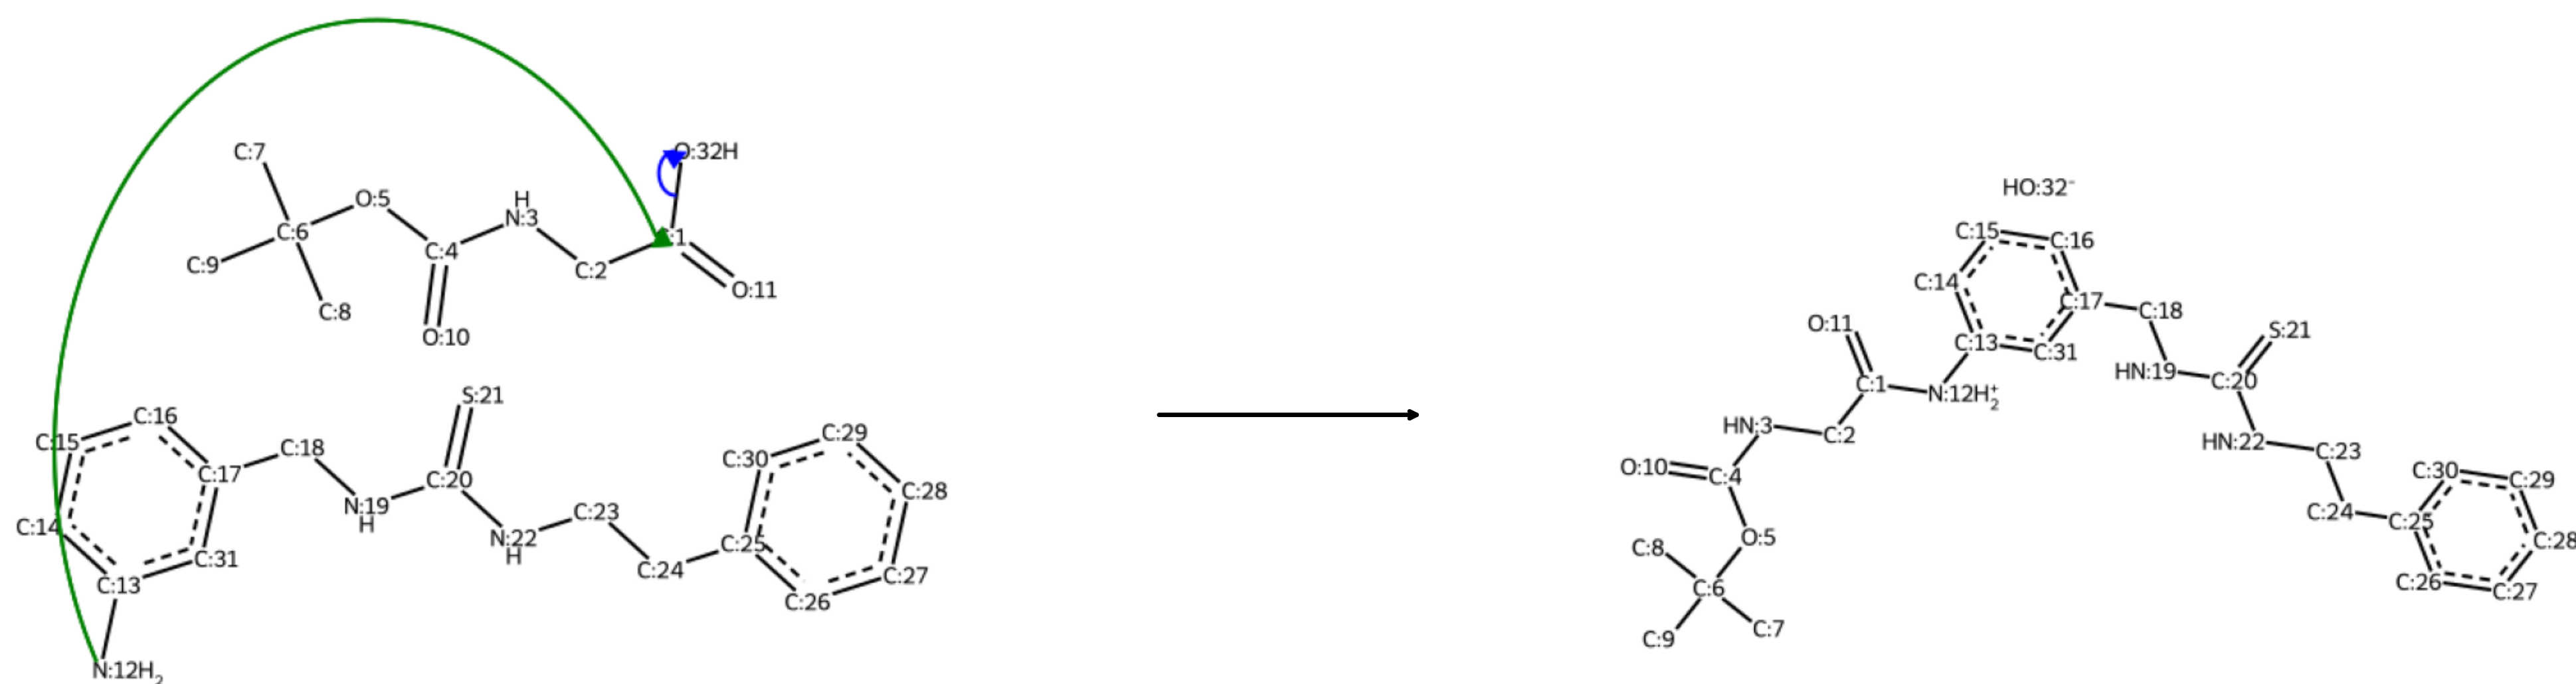



# Original reaction RXN\_ID:38

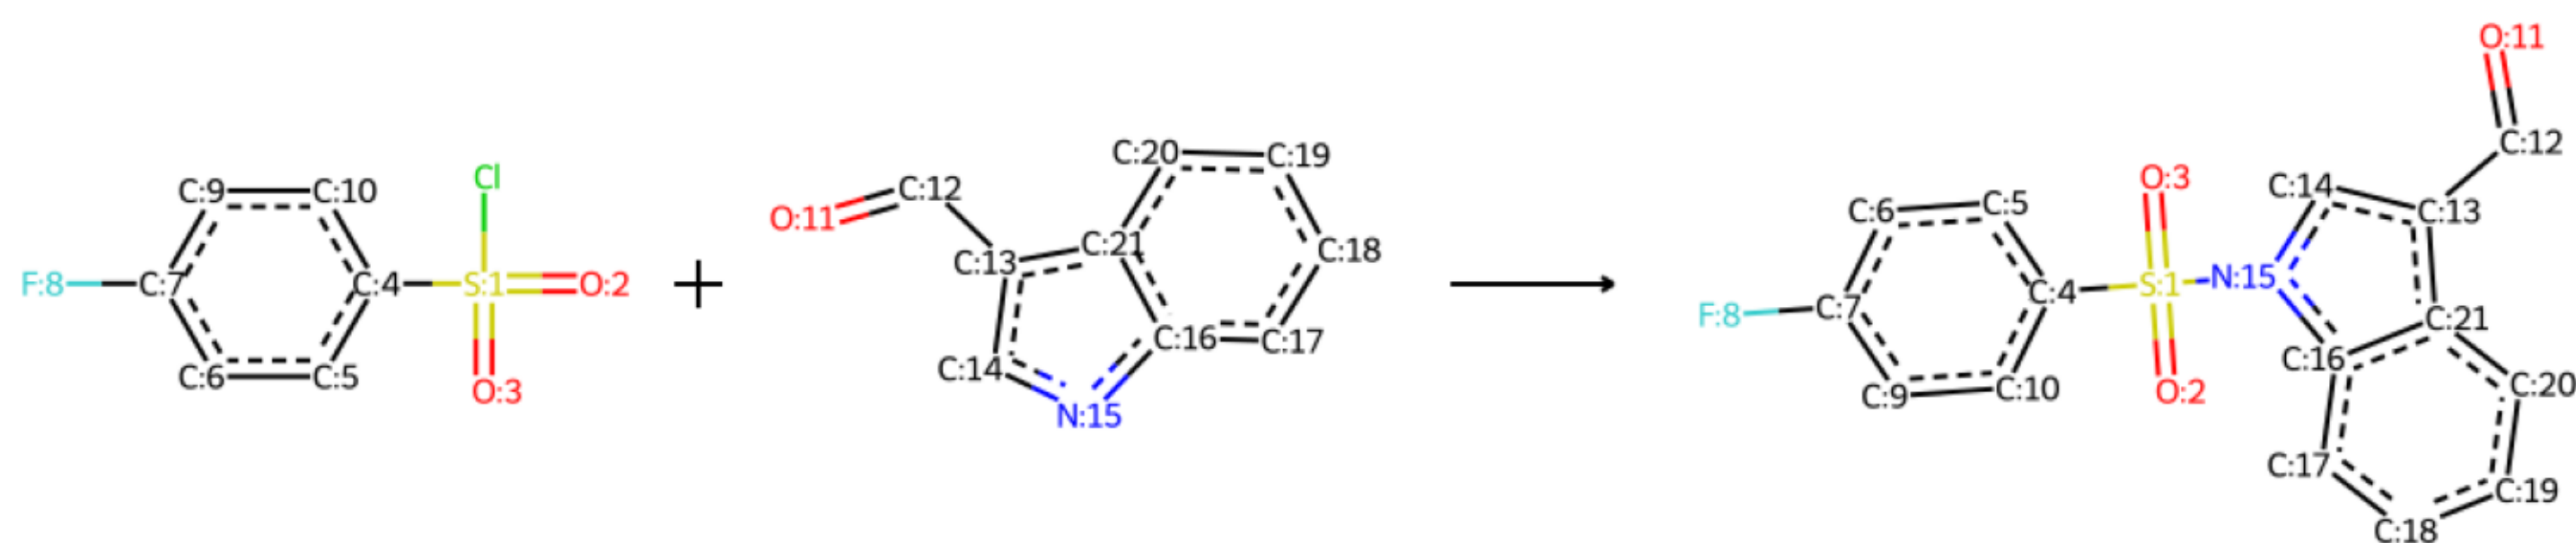

## ELECTRO-generated mechanistic pathway

[Arrow order: (1) green, (2) blue, (3) red, (4) orange]

step #1

Product(s)

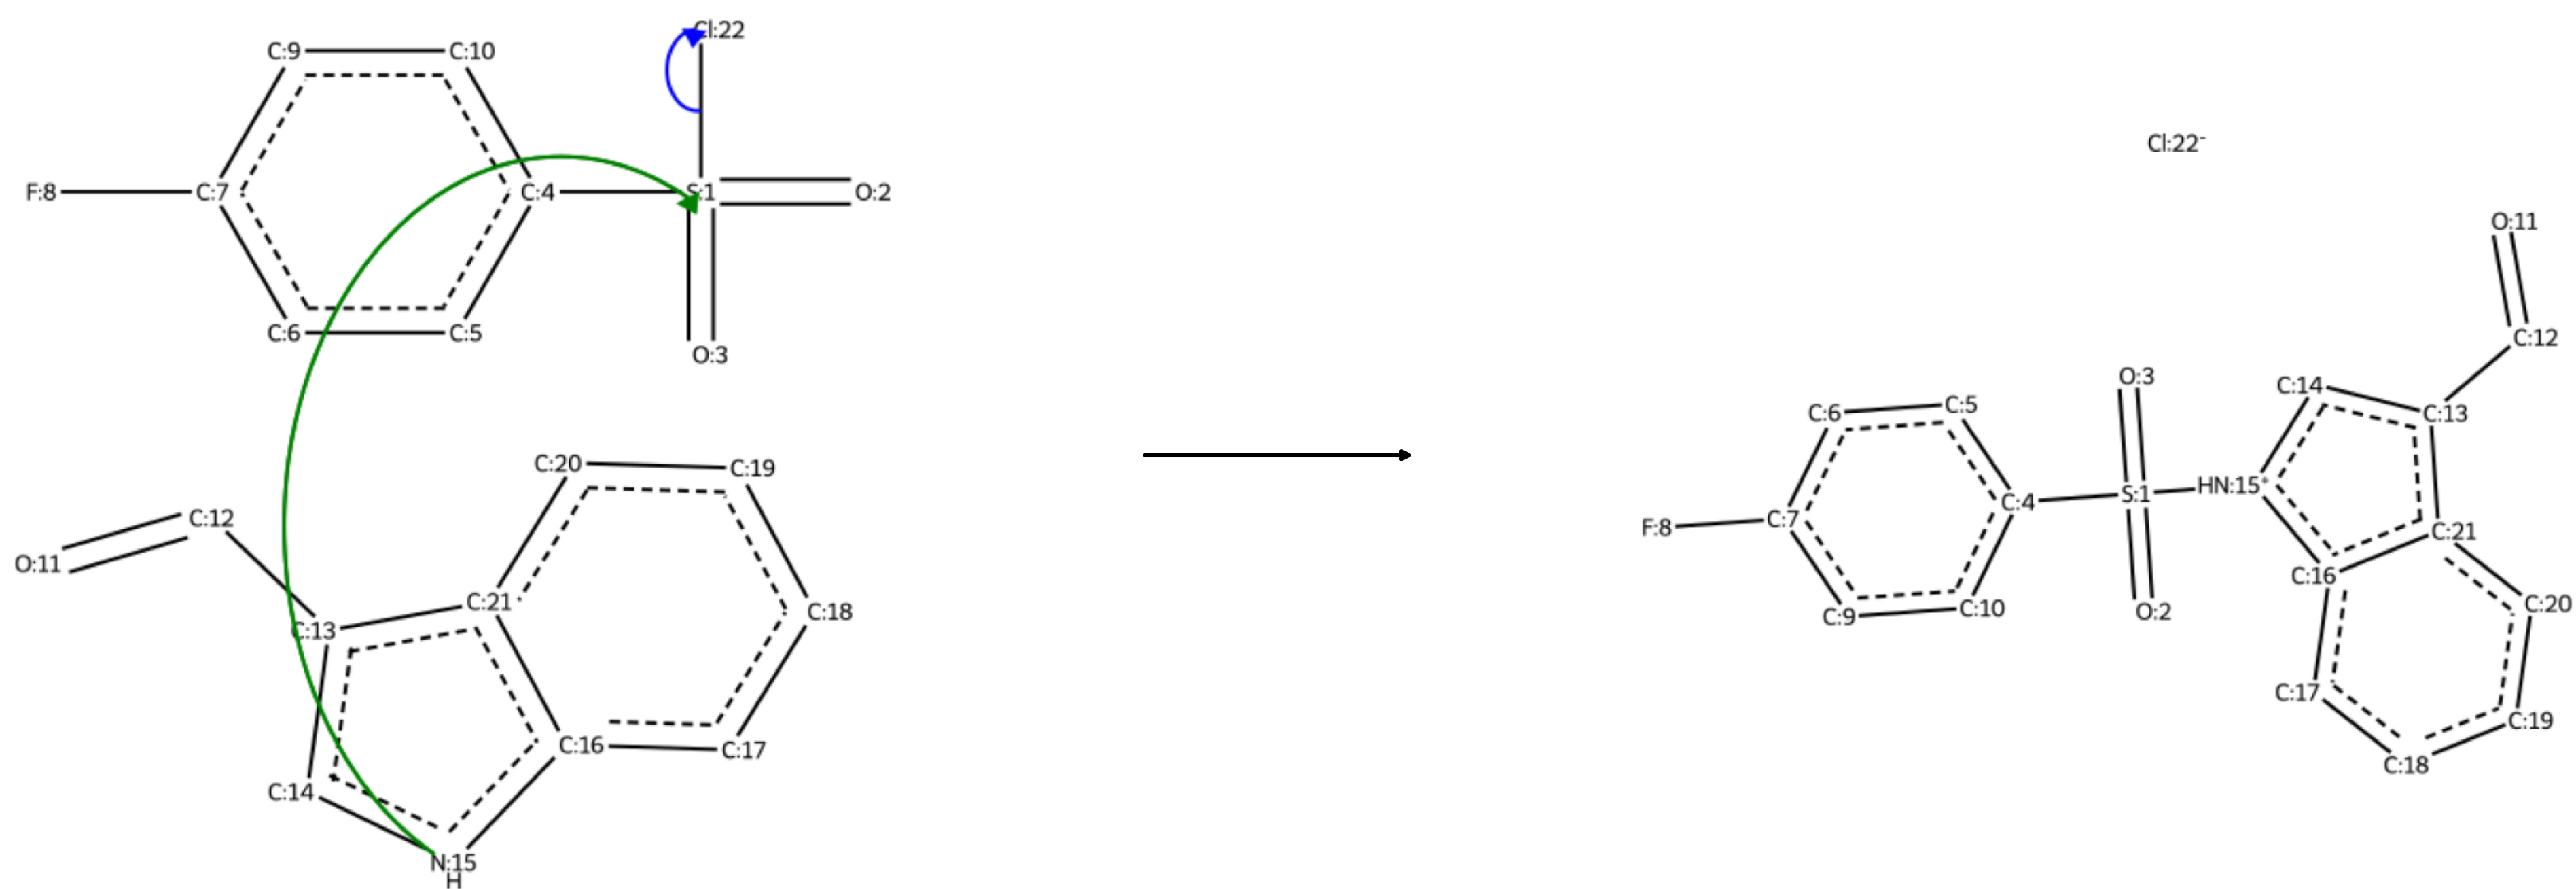

# Original reaction RXN\_ID:39

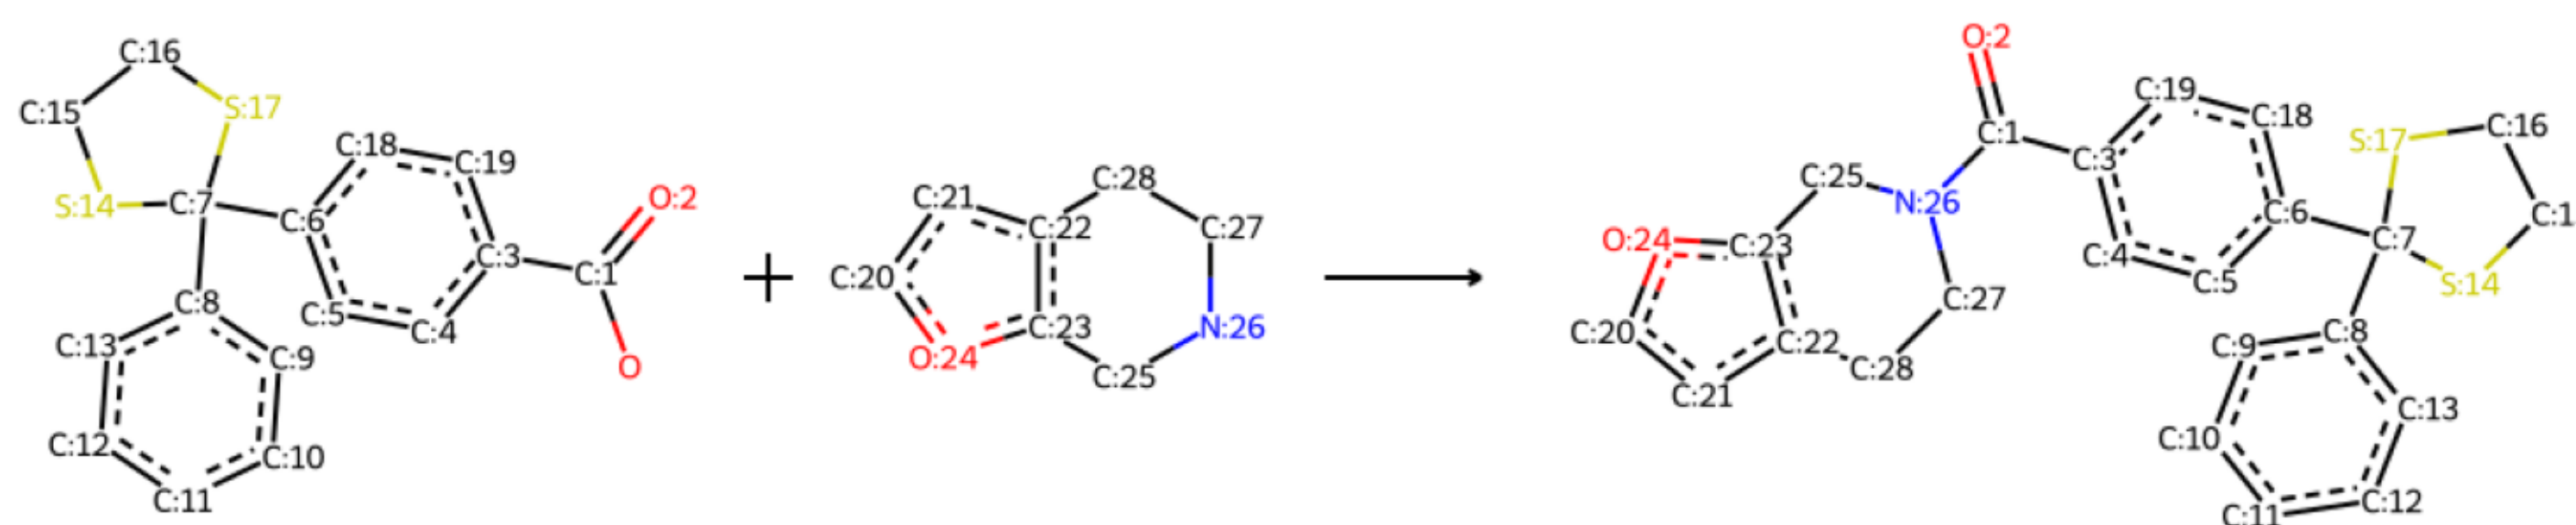

## ELECTRO-generated mechanistic pathway

[Arrow order: (1) green, (2) blue, (3) red, (4) orange]

step #1

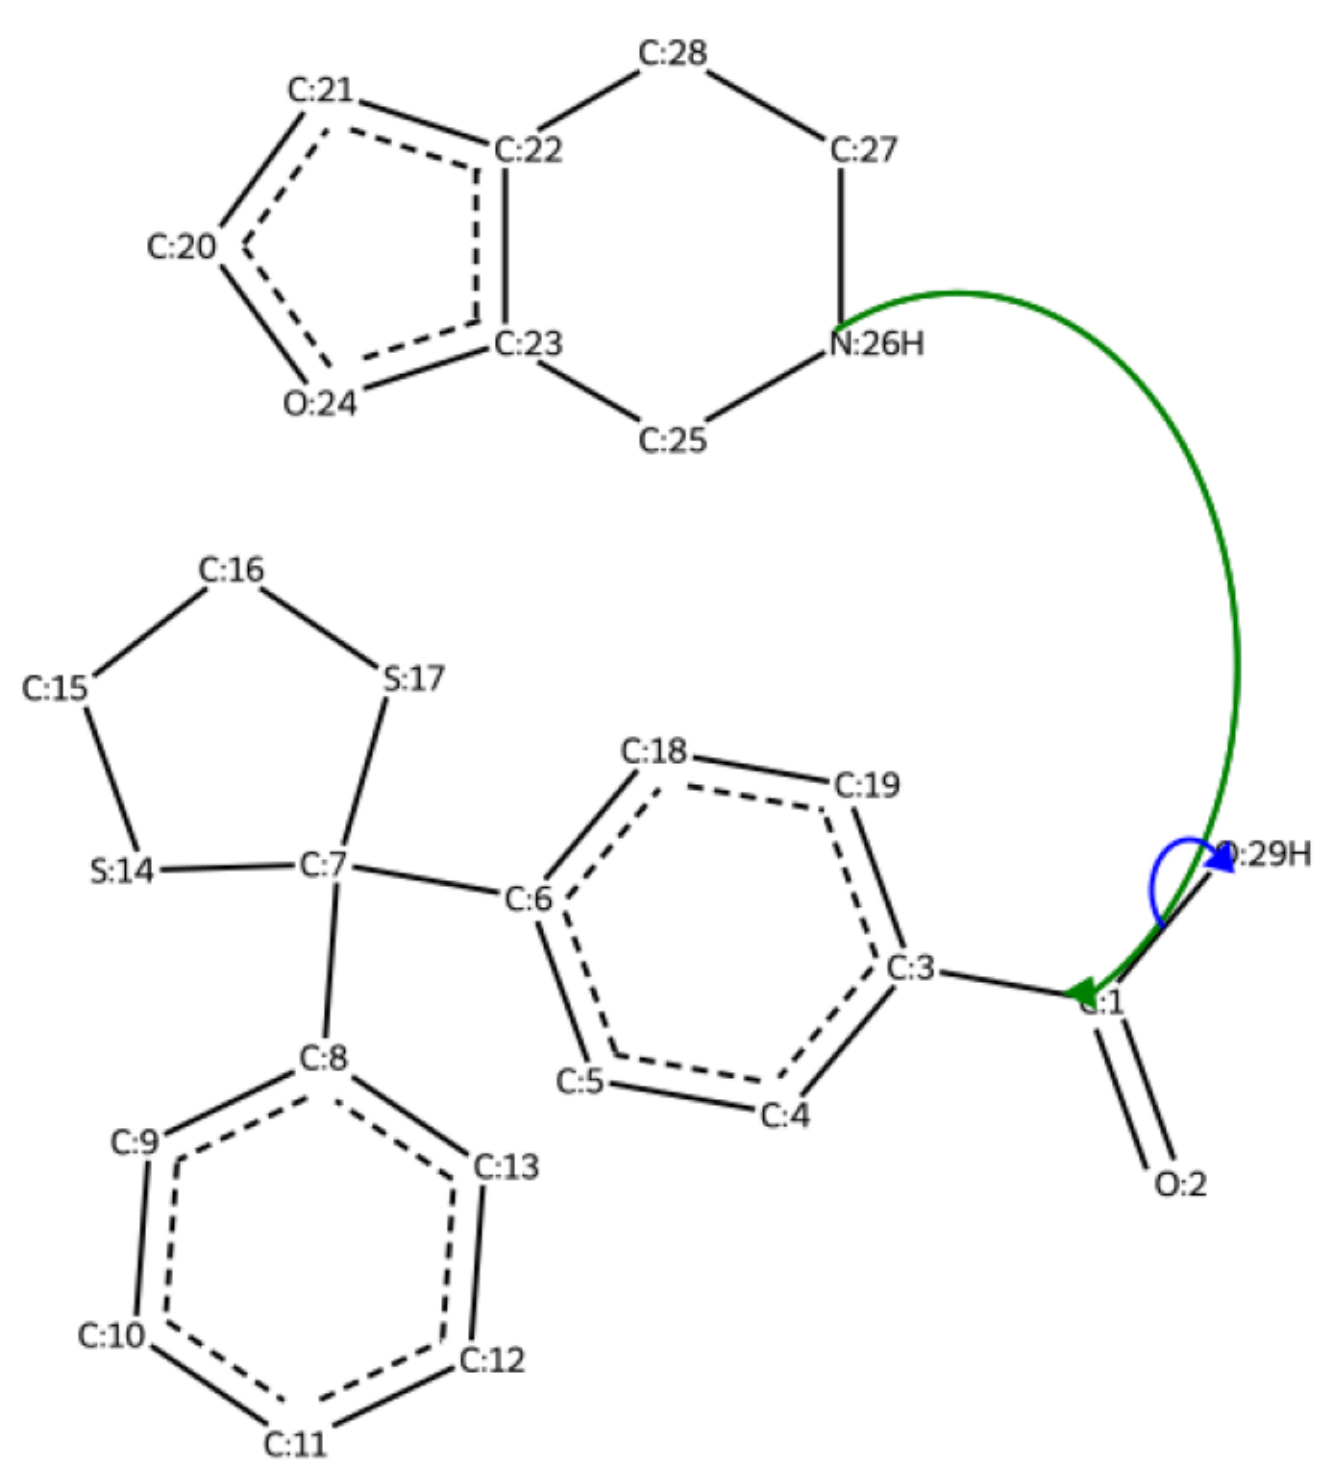

Product(s)

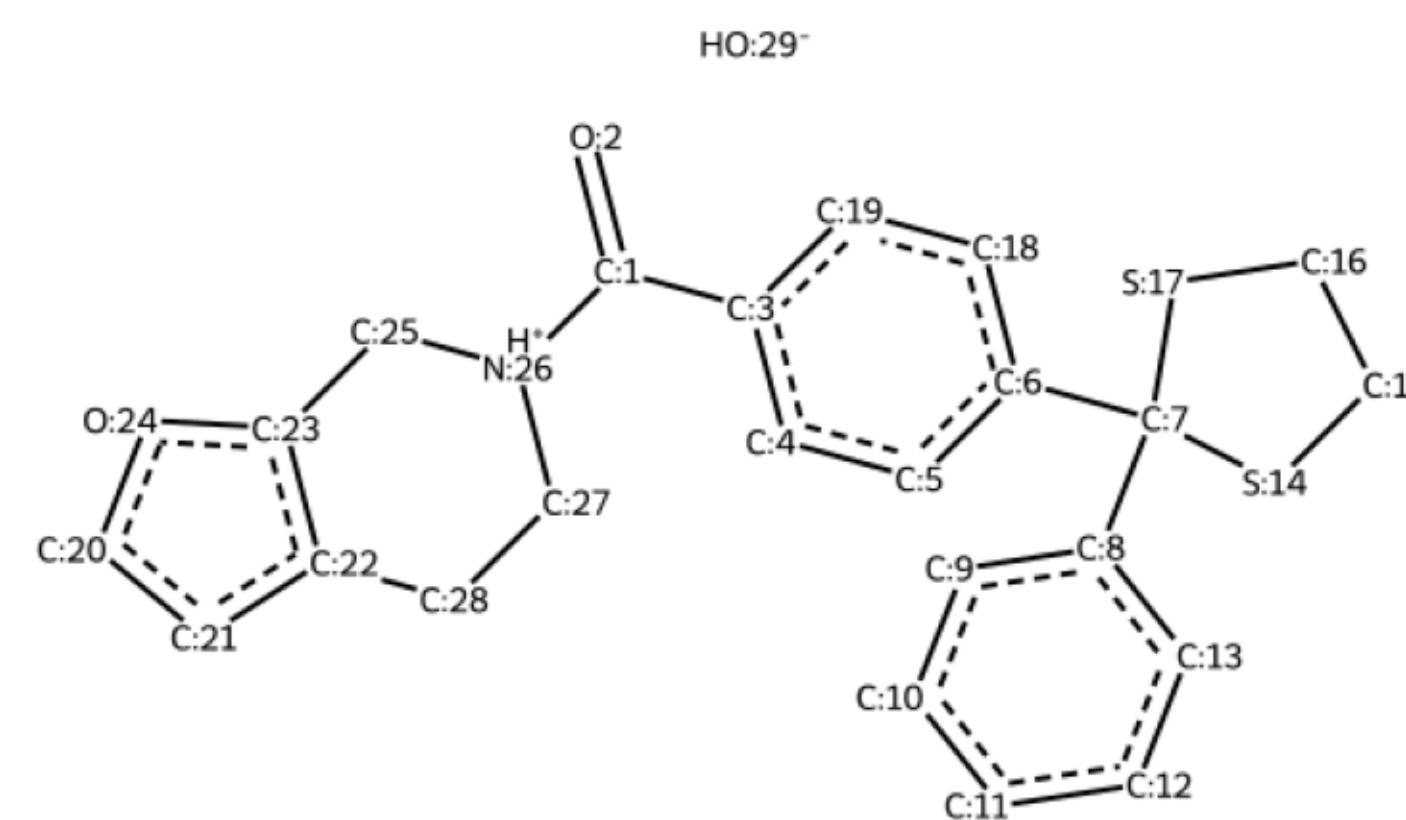



# Original reaction RXN\_ID:40

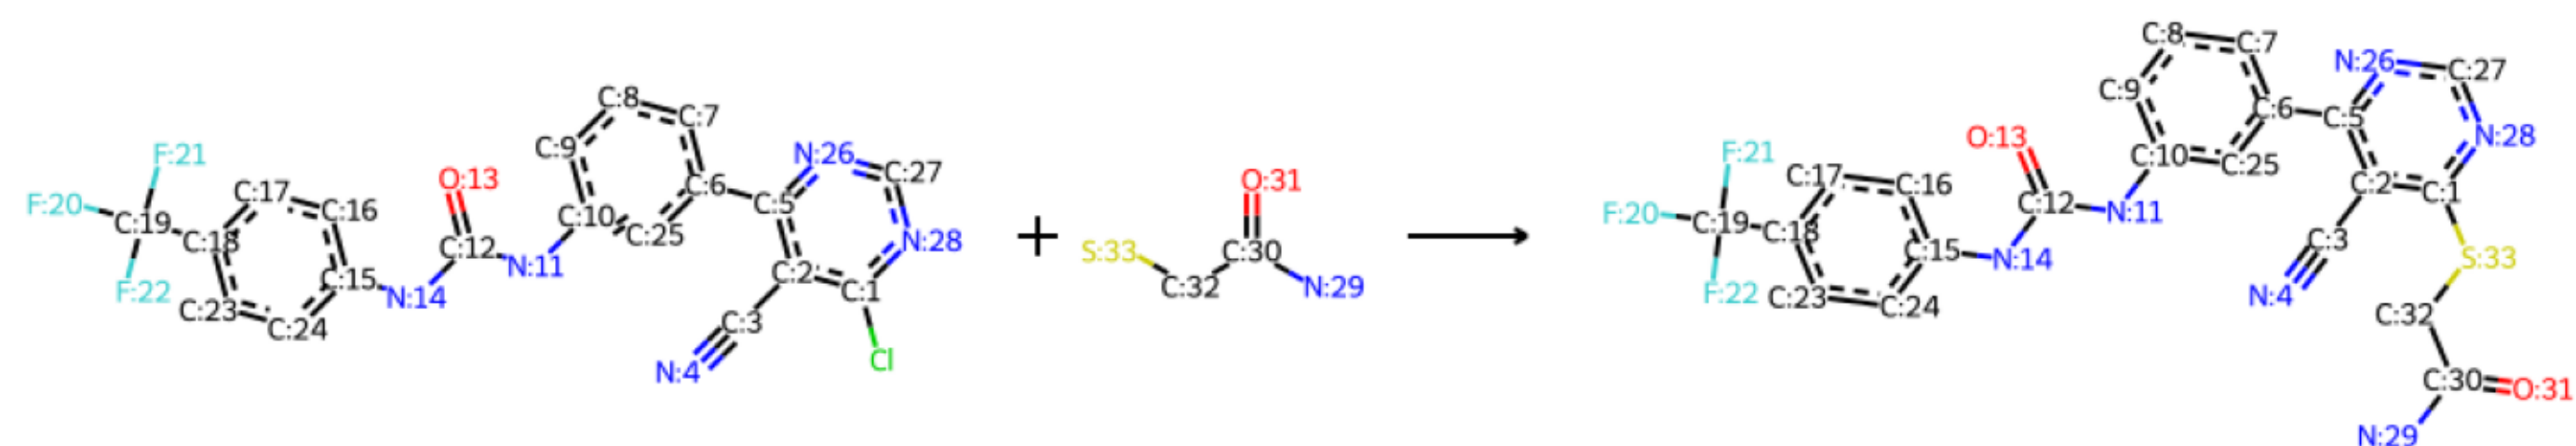

## ELECTRO-generated mechanistic pathway

[Arrow order: (1) green, (2) blue, (3) red, (4) orange]

step #1

Product(s)

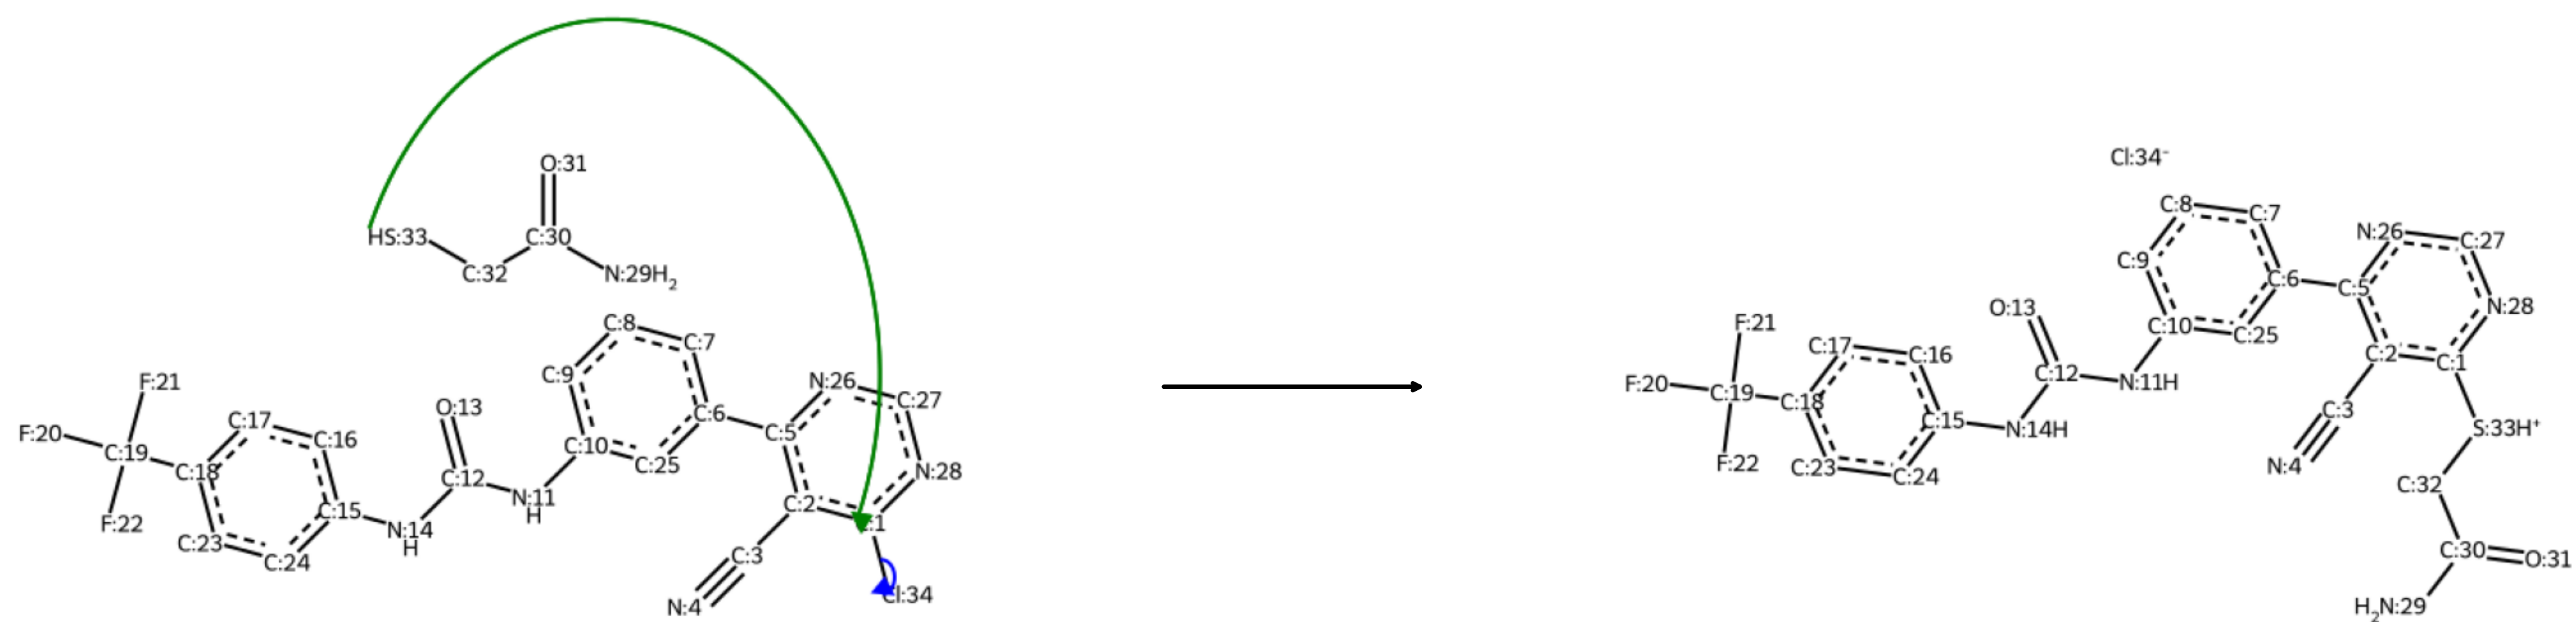

# Original reaction RXN\_ID:41

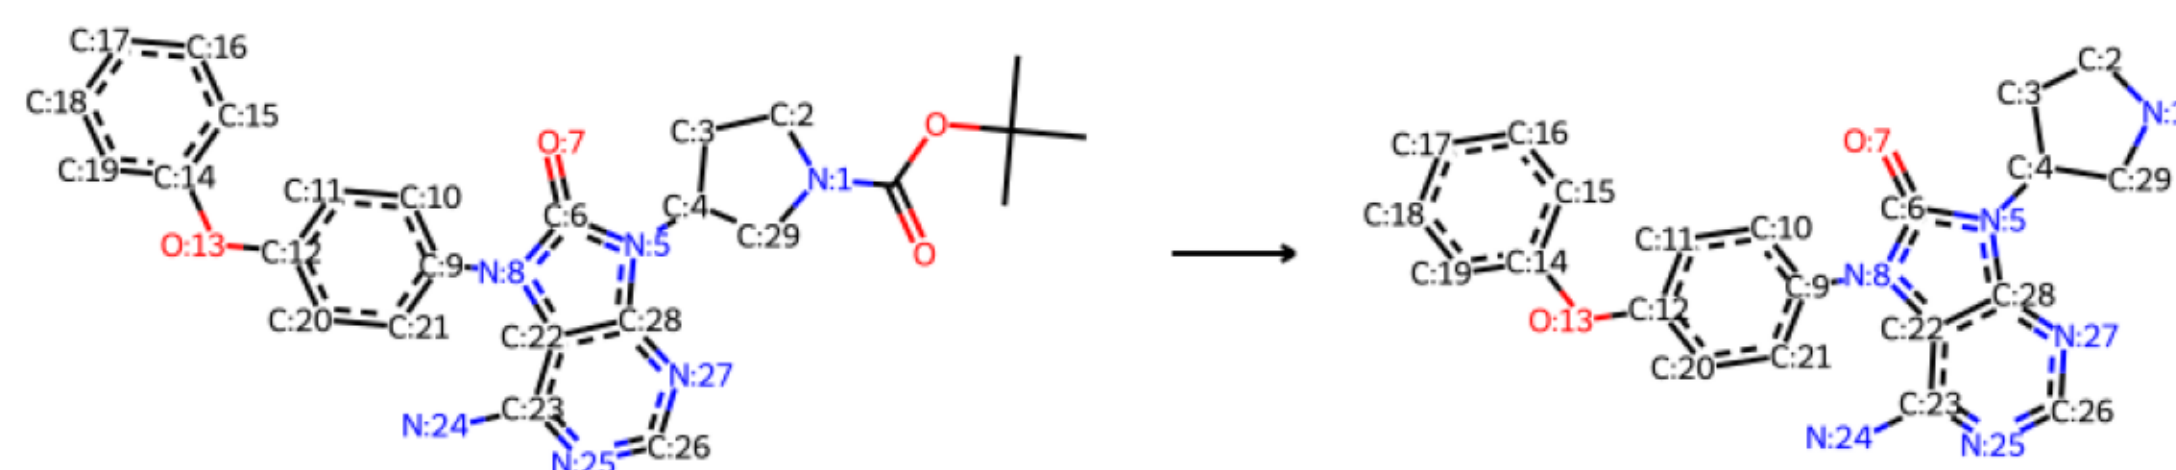

## ELECTRO-generated mechanistic pathway

[Arrow order: (1) green, (2) blue, (3) red, (4) orange]

step #1

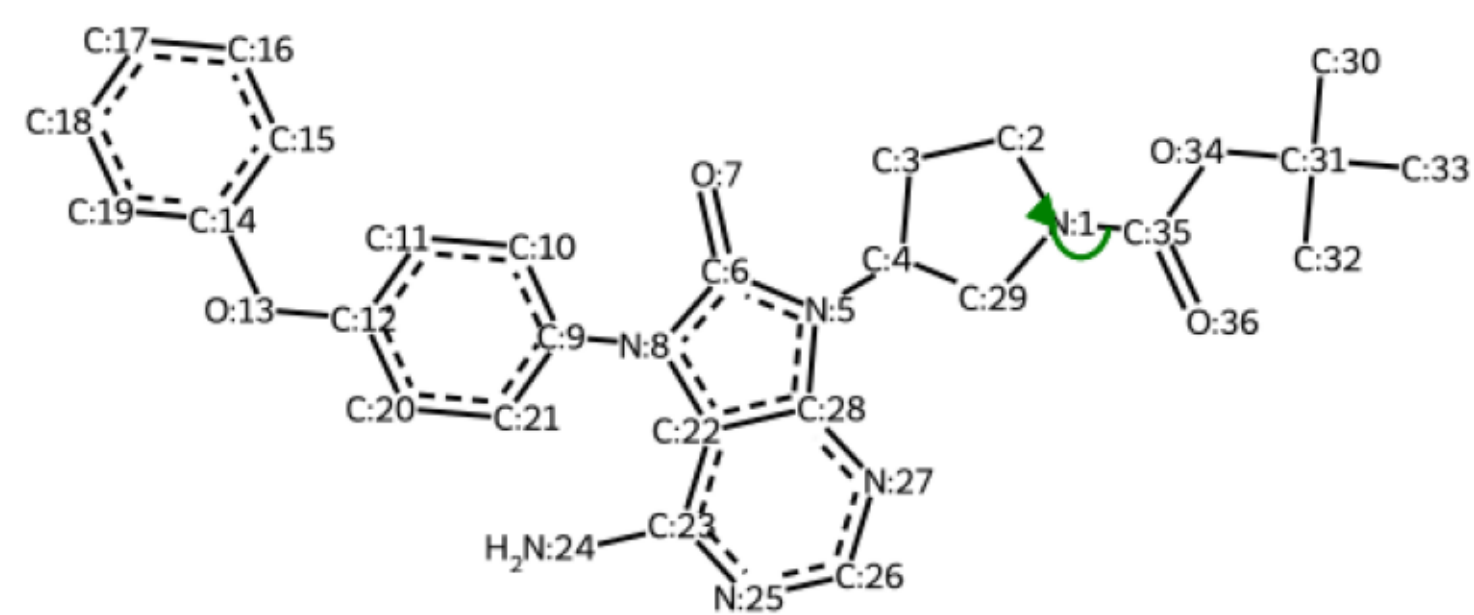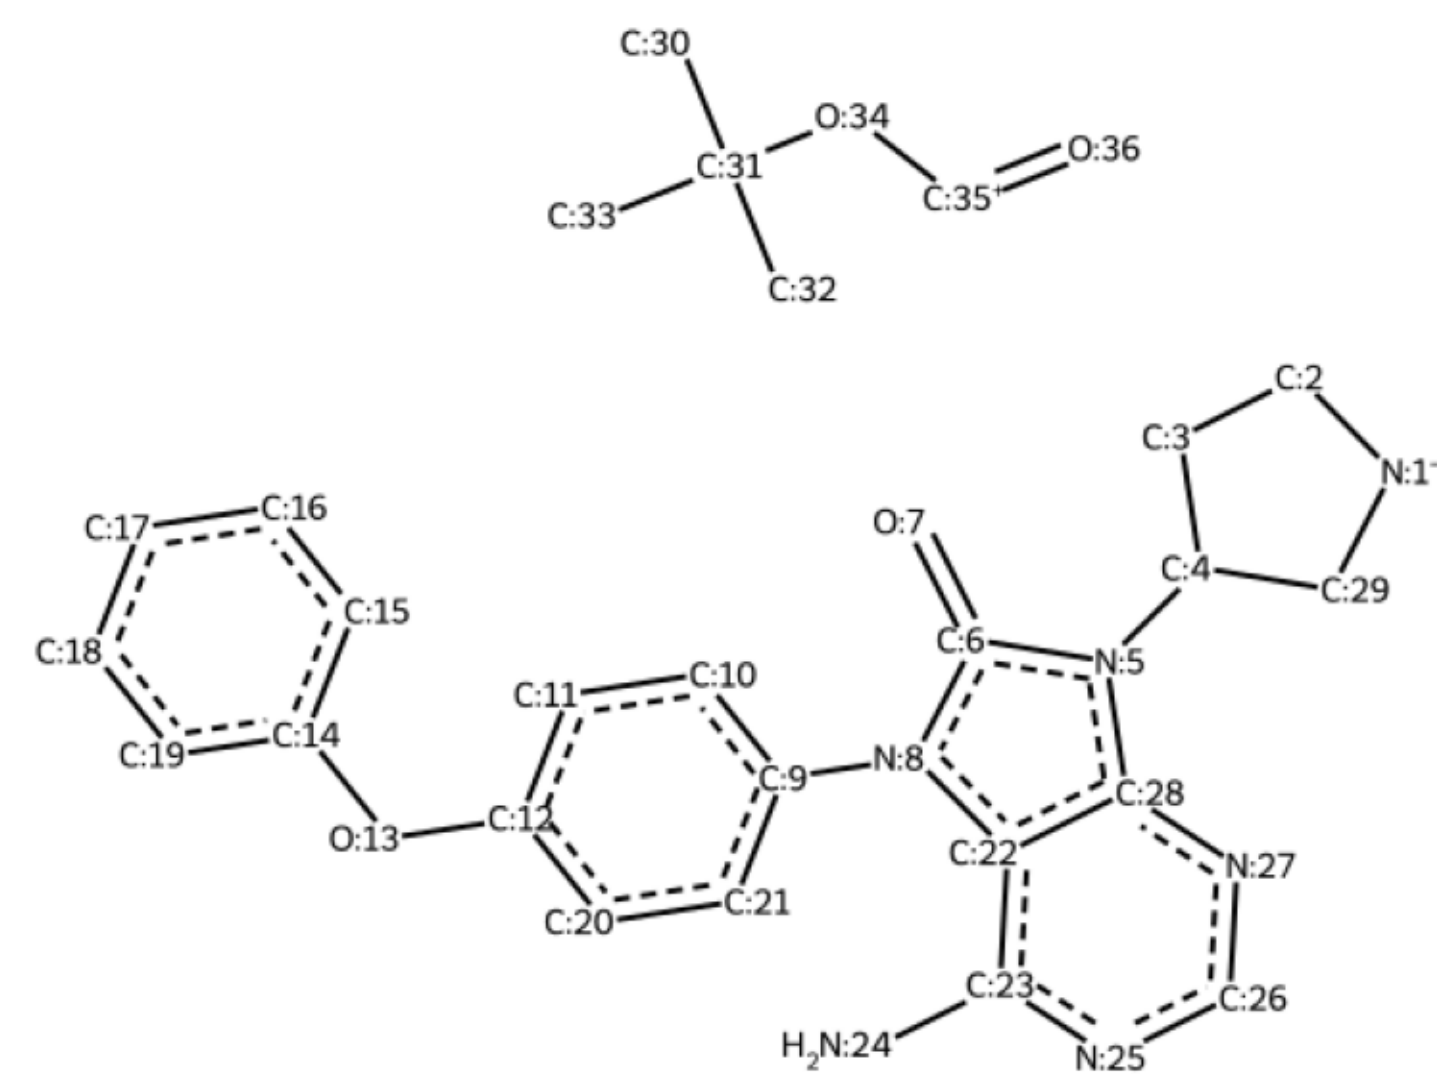

Product(s)



# Original reaction RXN\_ID:42

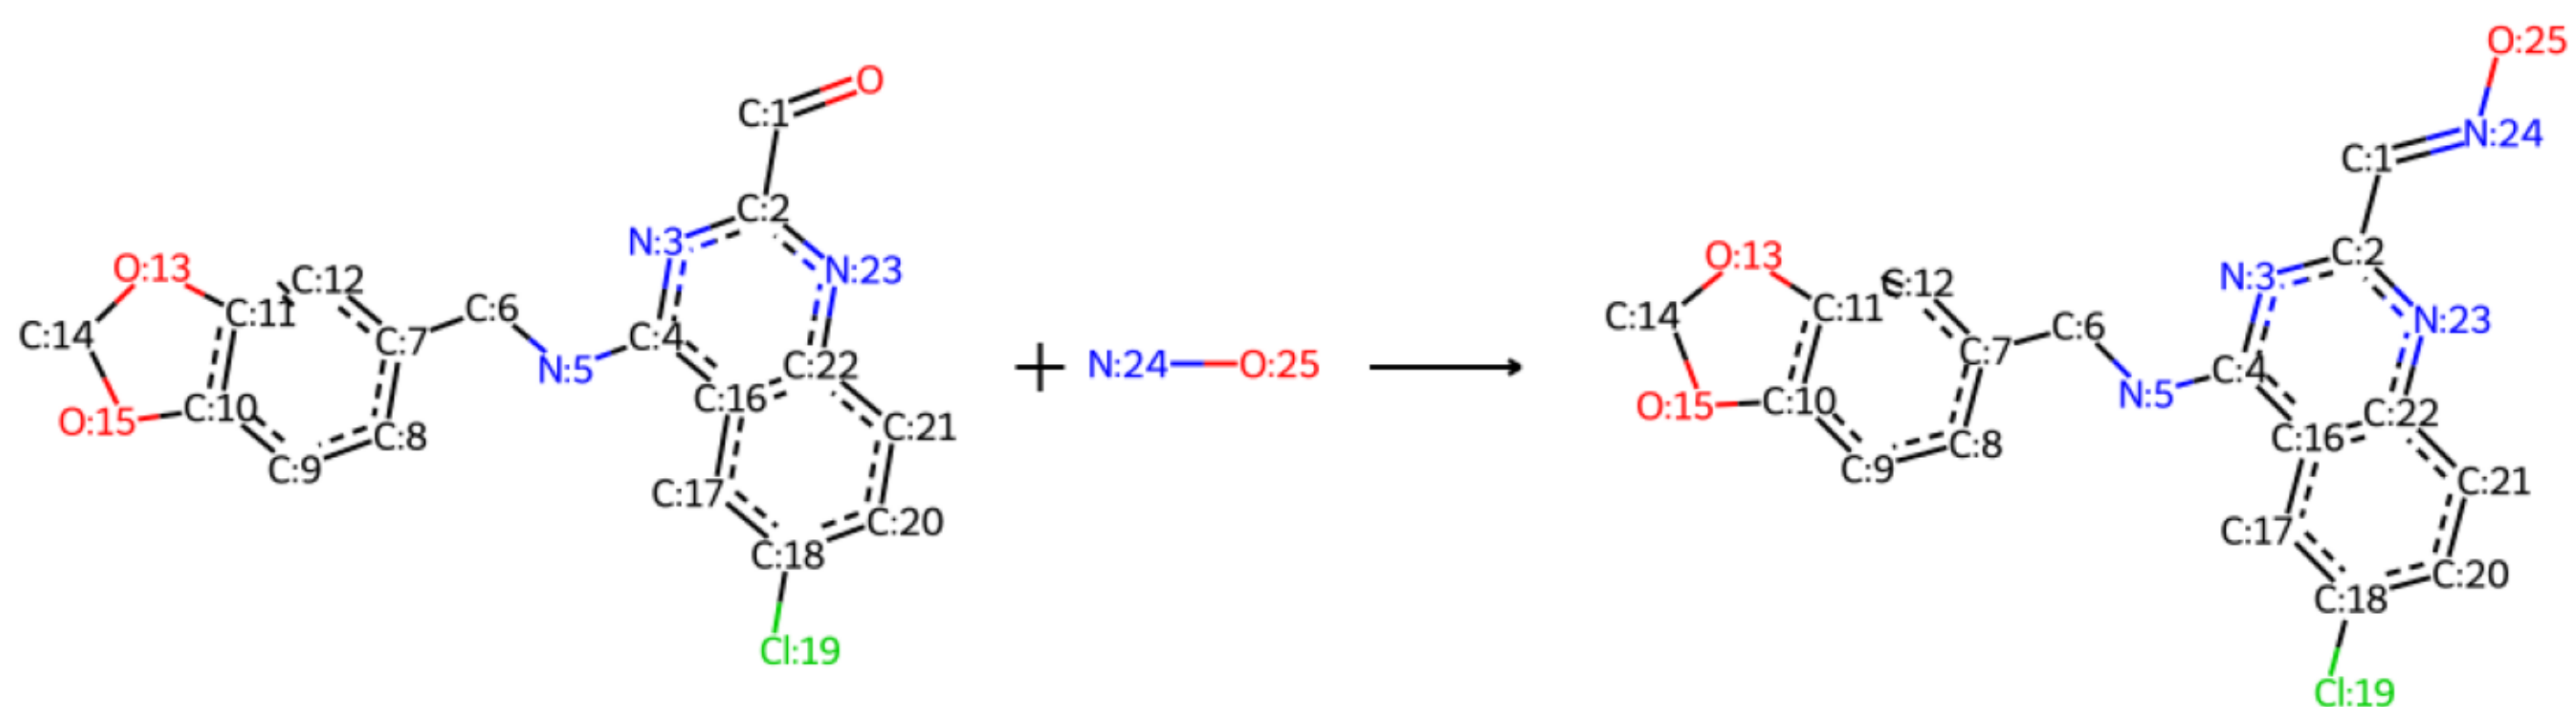

## ELECTRO-generated mechanistic pathway

[Arrow order: (1) green, (2) blue, (3) red, (4) orange]

step #1

Product(s)

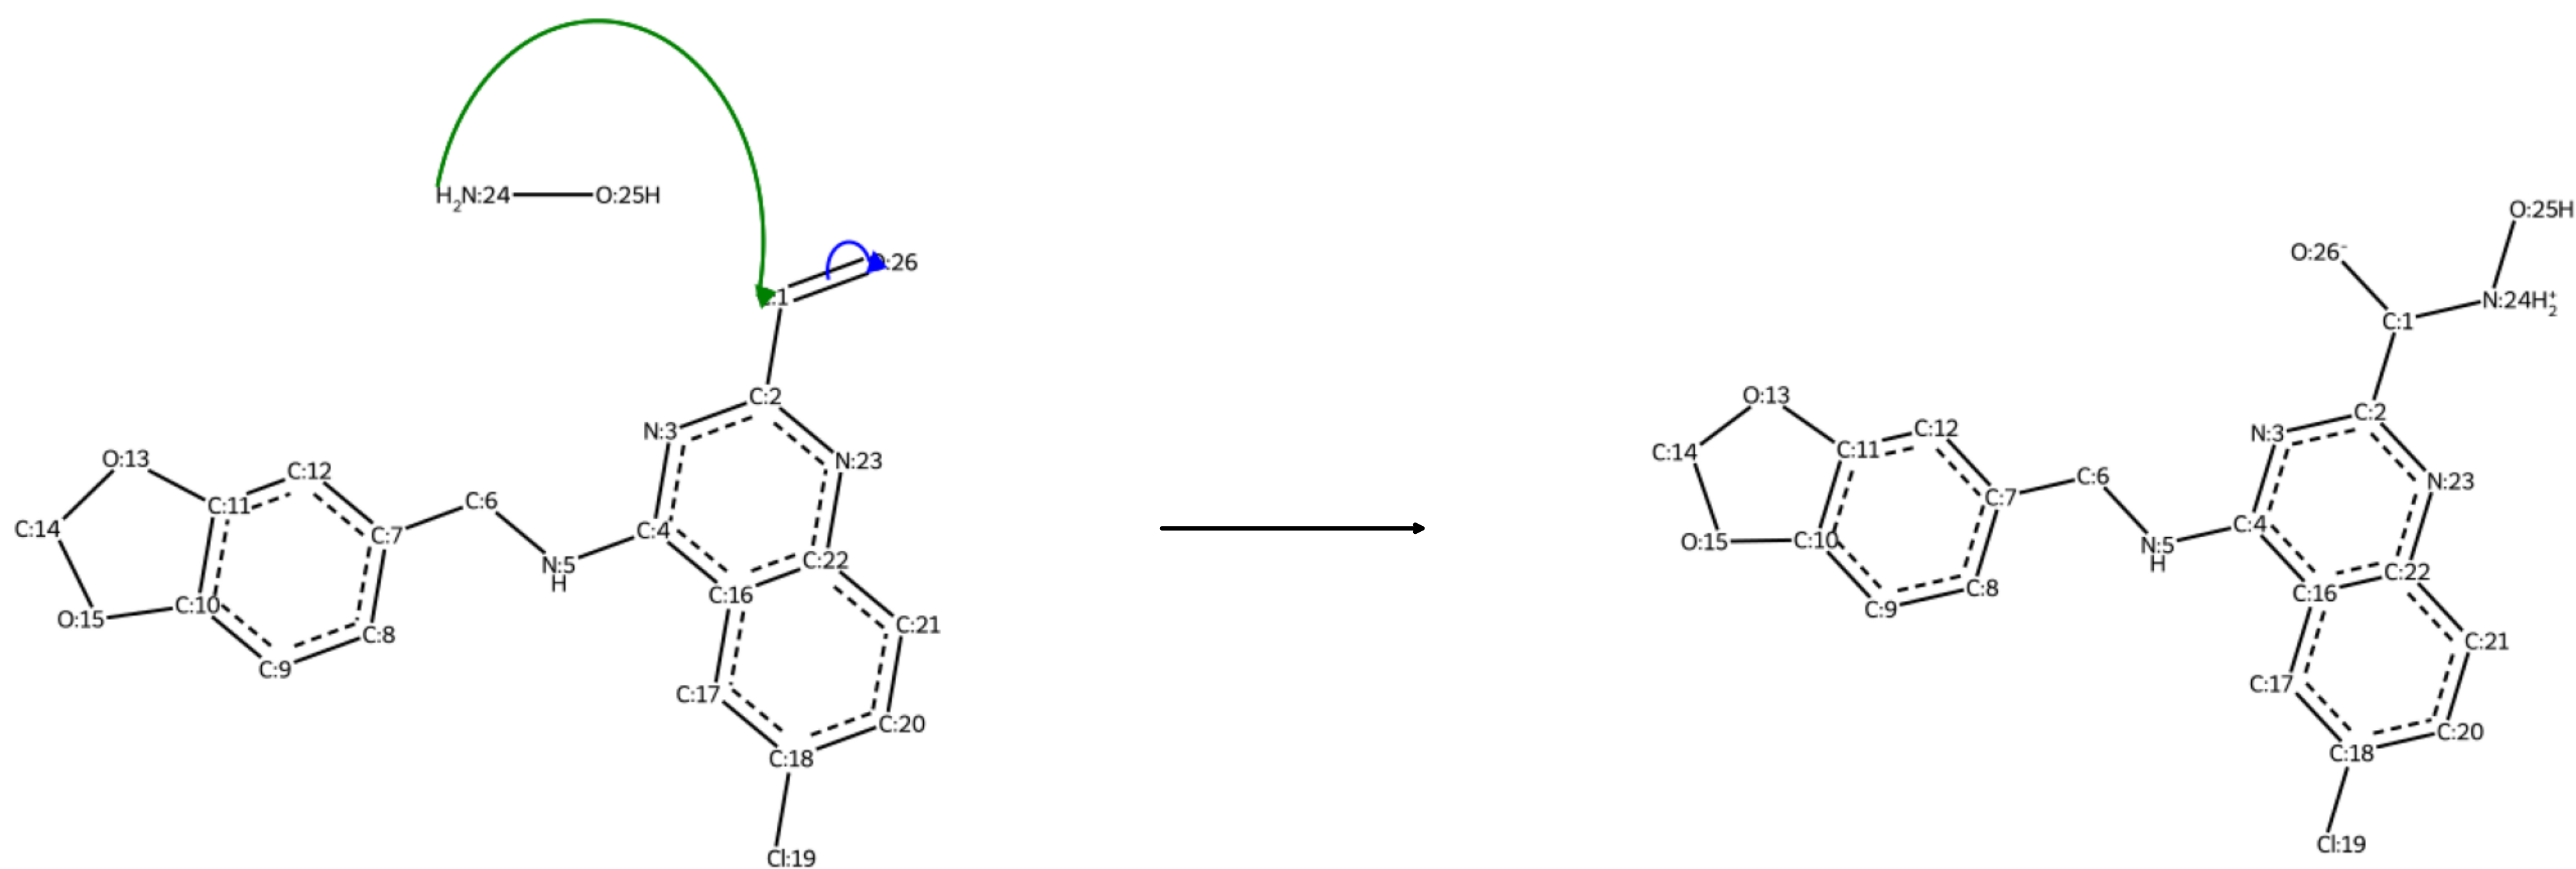

# Original reaction RXN\_ID:43

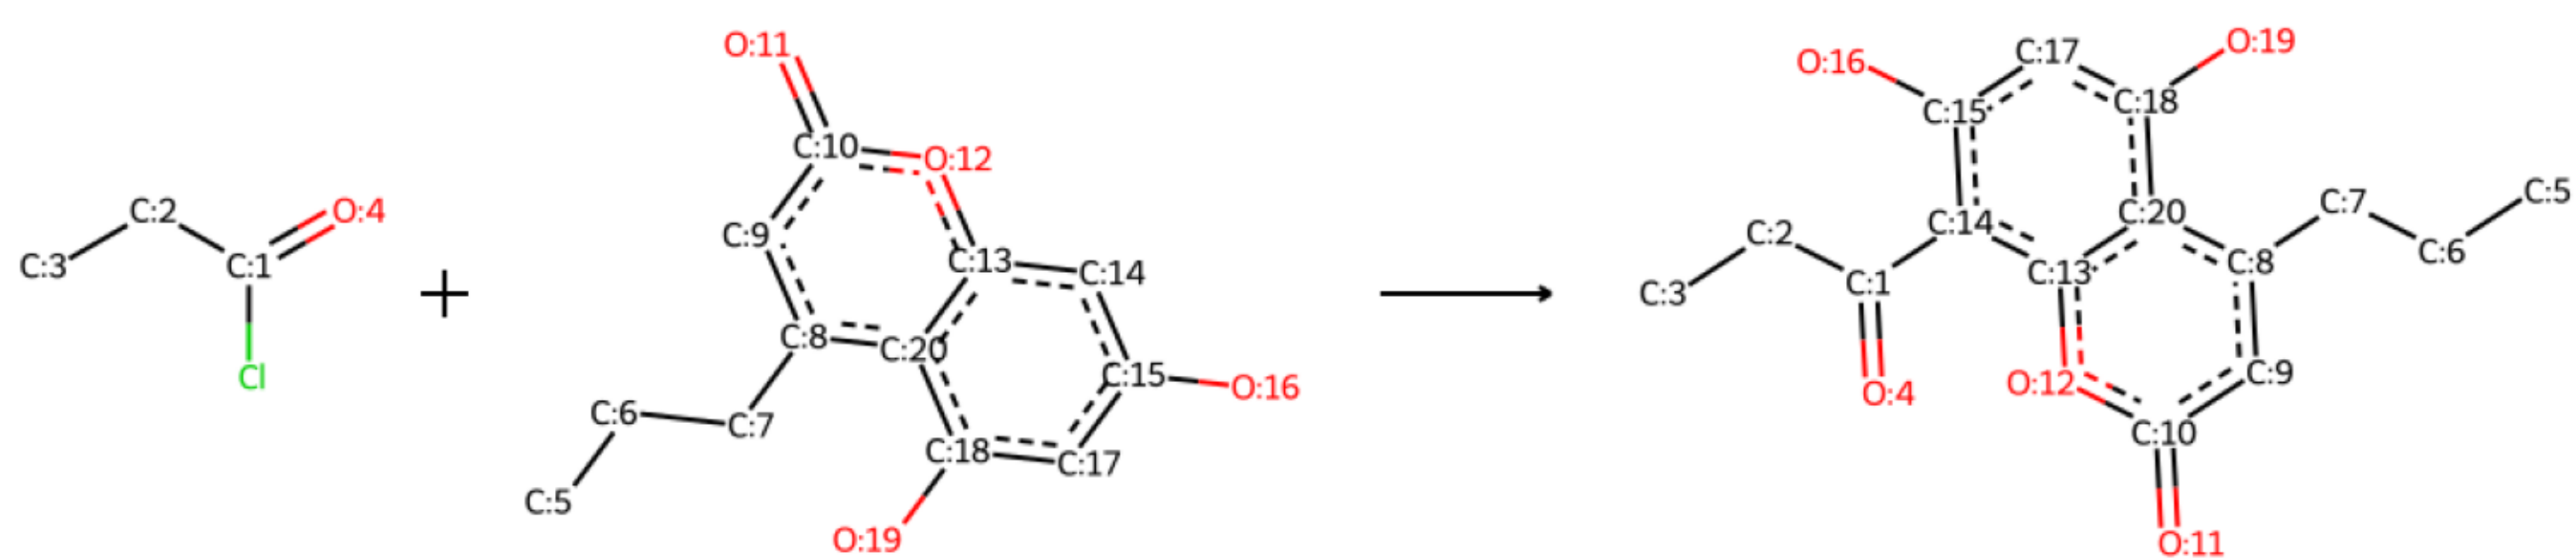

## ELECTRO-generated mechanistic pathway

[Arrow order: (1) green, (2) blue, (3) red, (4) orange]

step #1

Product(s)

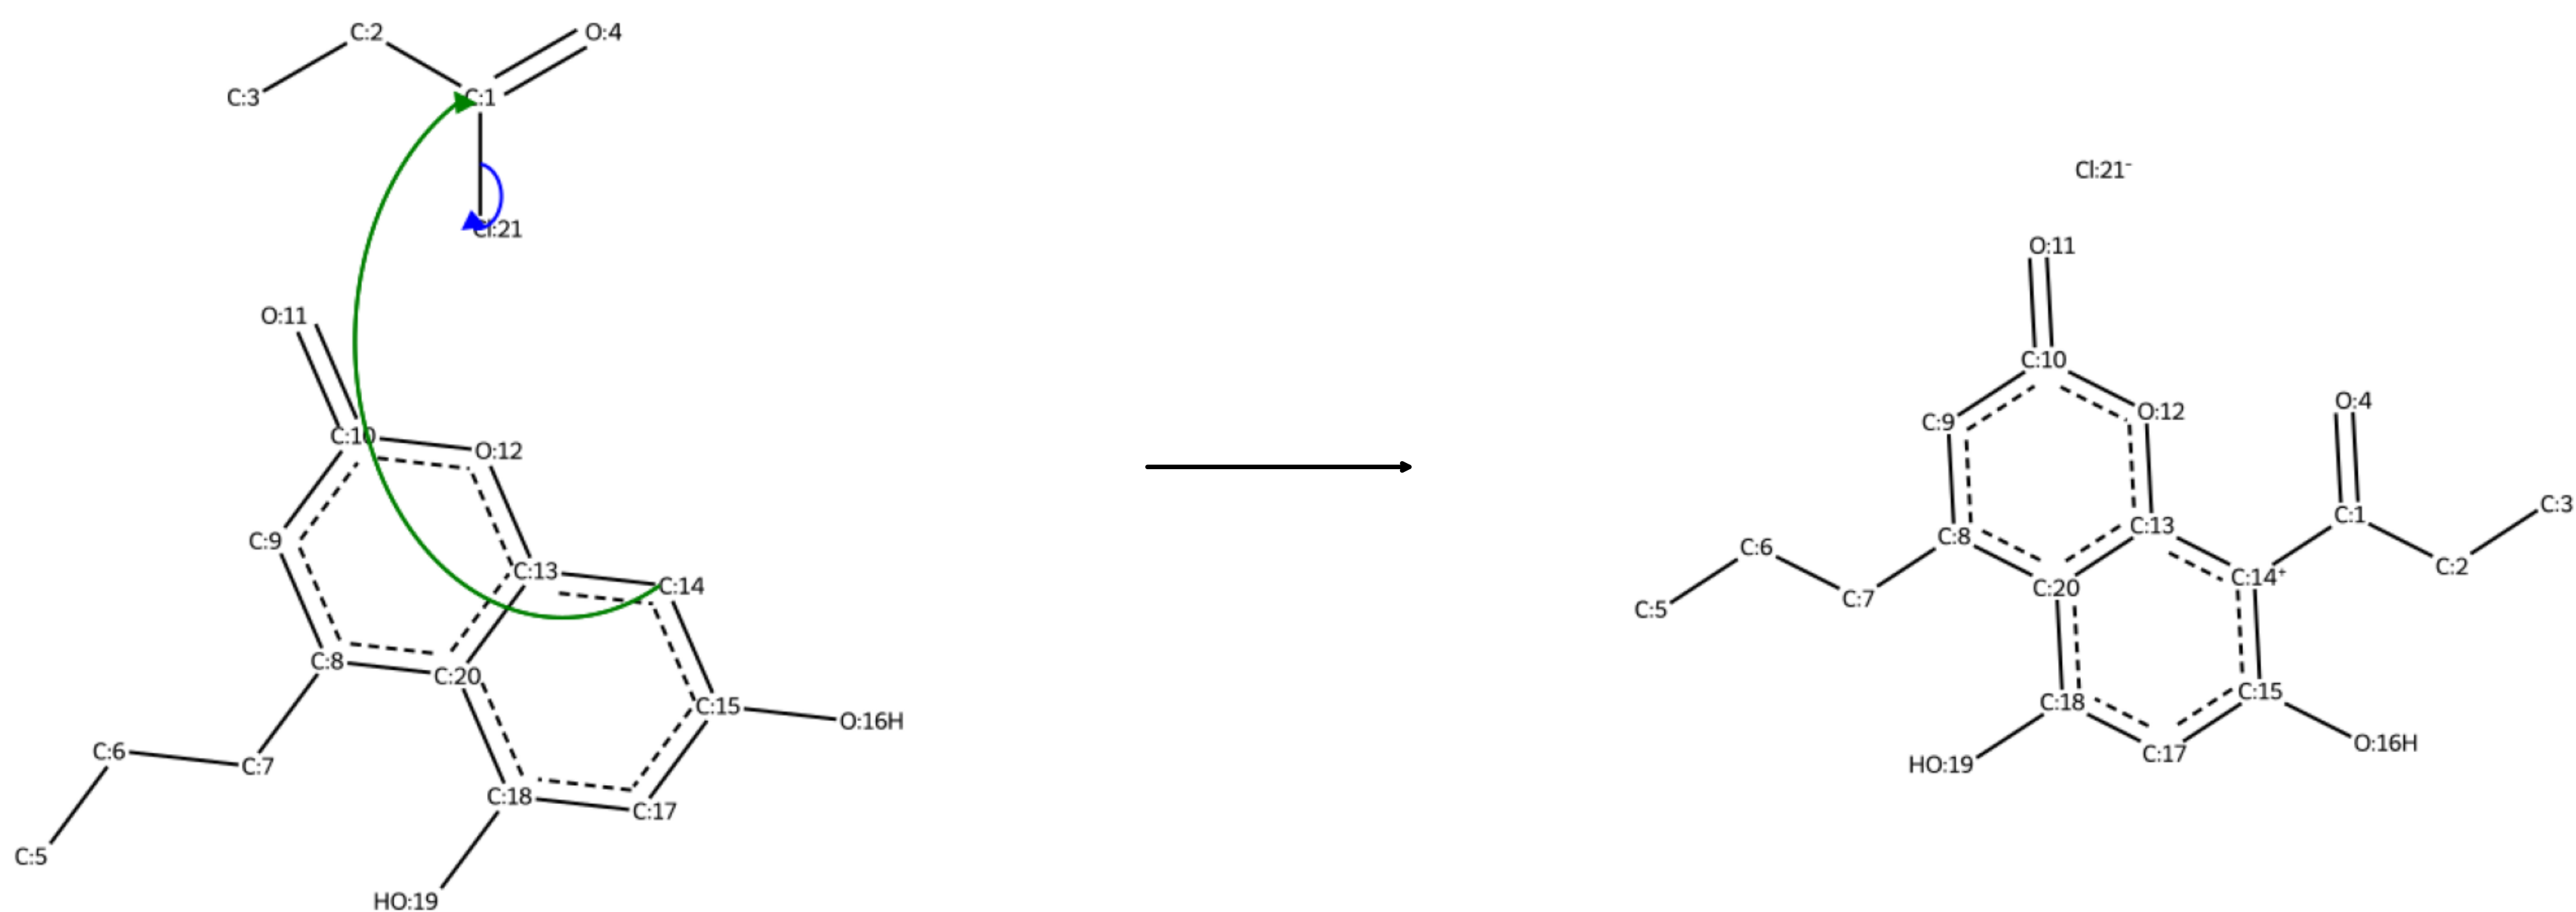



# Original reaction RXN\_ID:44

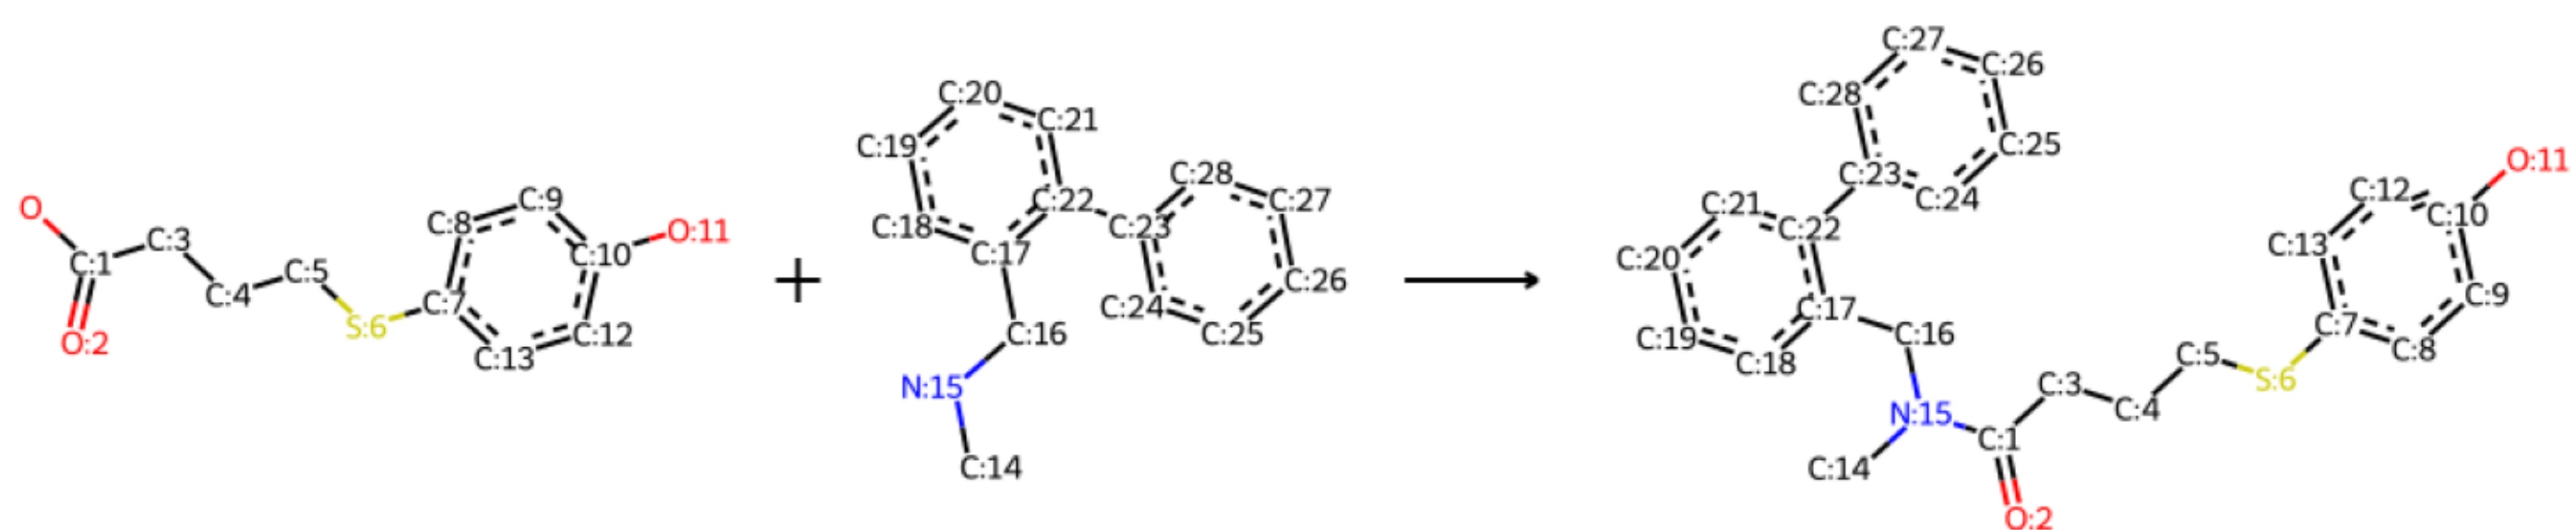

## ELECTRO-generated mechanistic pathway

[Arrow order: (1) green, (2) blue, (3) red, (4) orange]

step #1

Product(s)

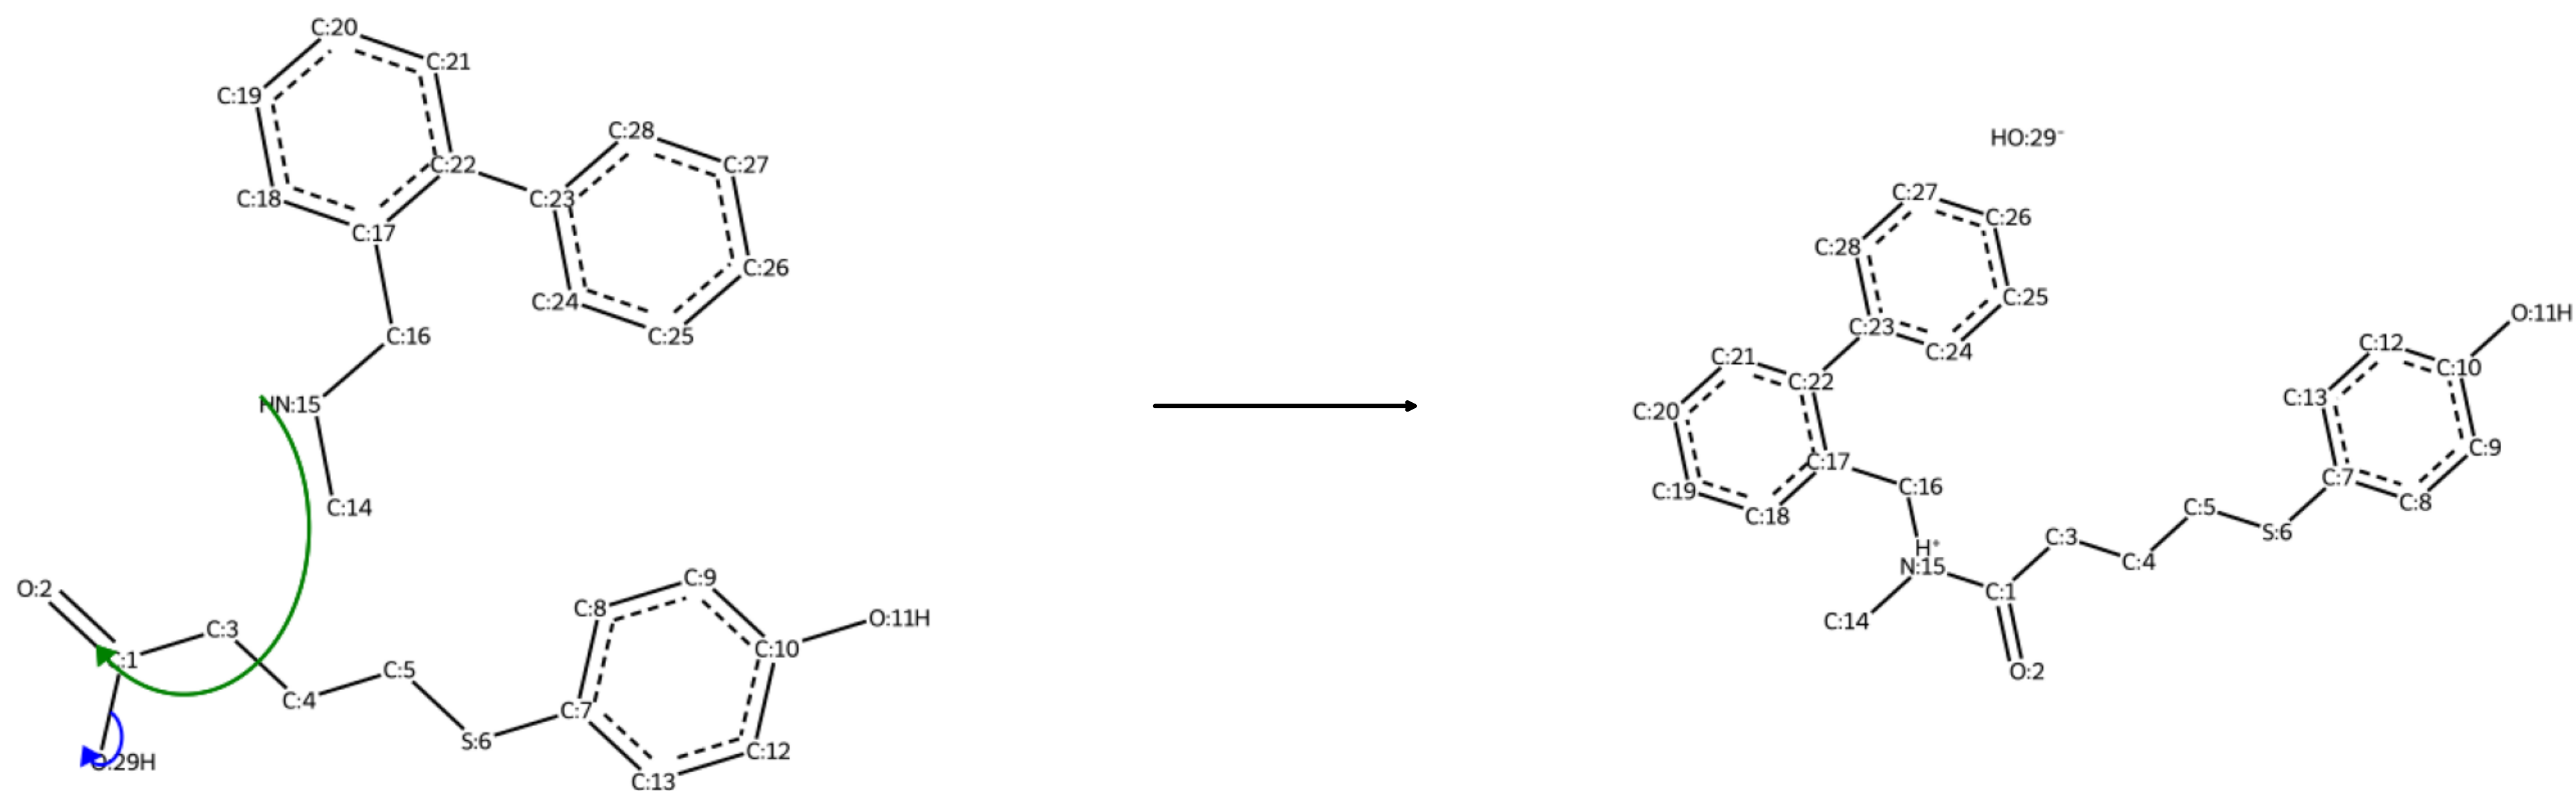

# Original reaction RXN\_ID:45

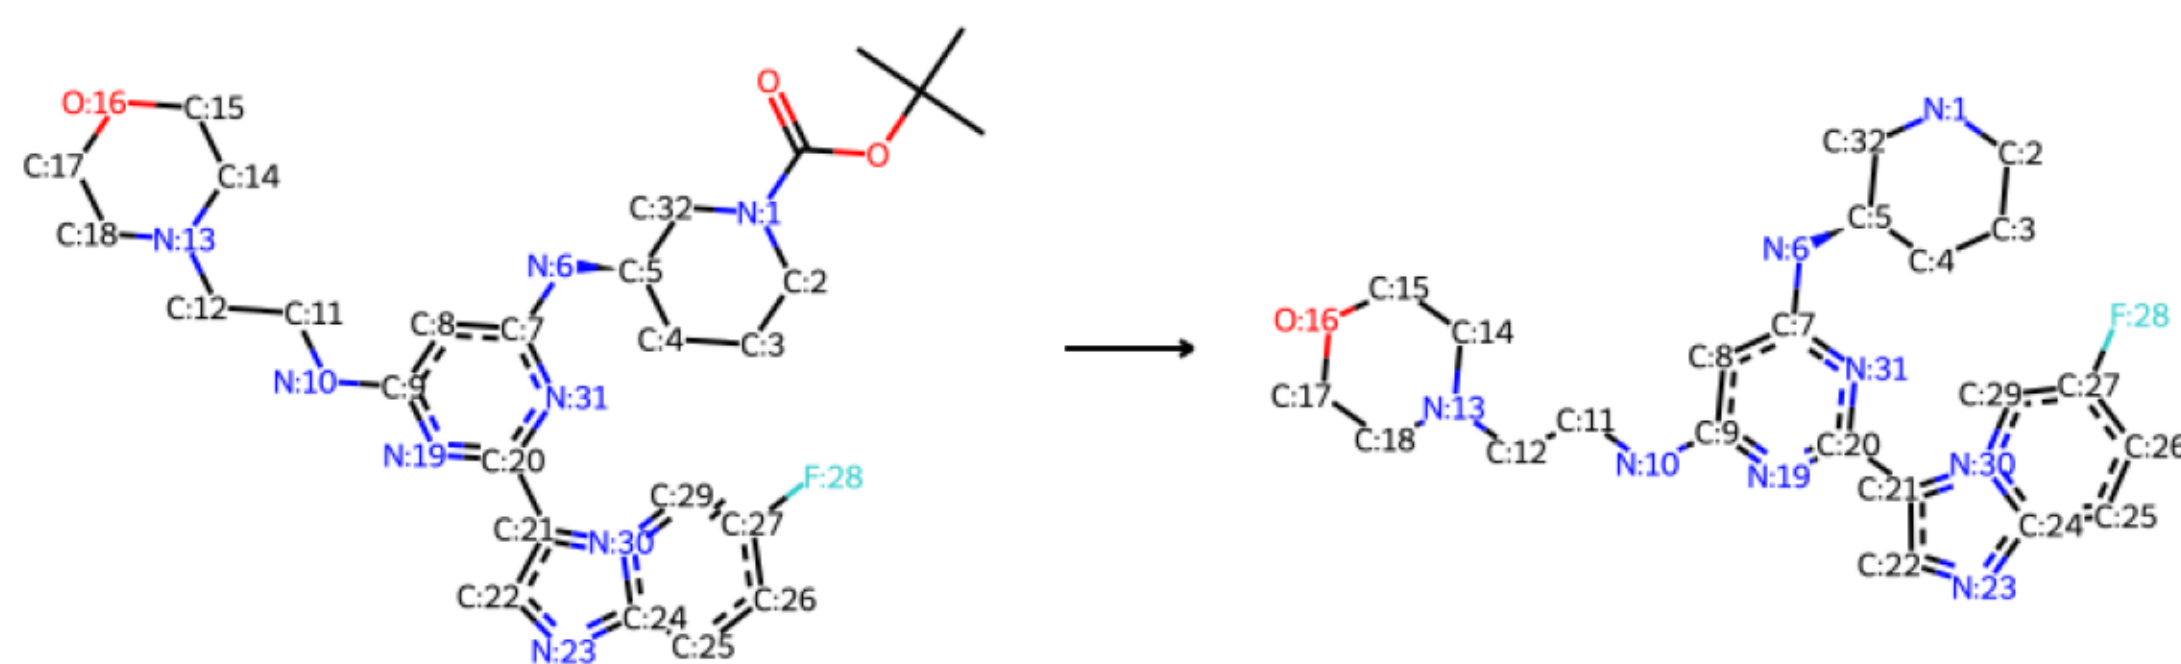

## ELECTRO-generated mechanistic pathway

[Arrow order: (1) green, (2) blue, (3) red, (4) orange]

step #1

Product(s)

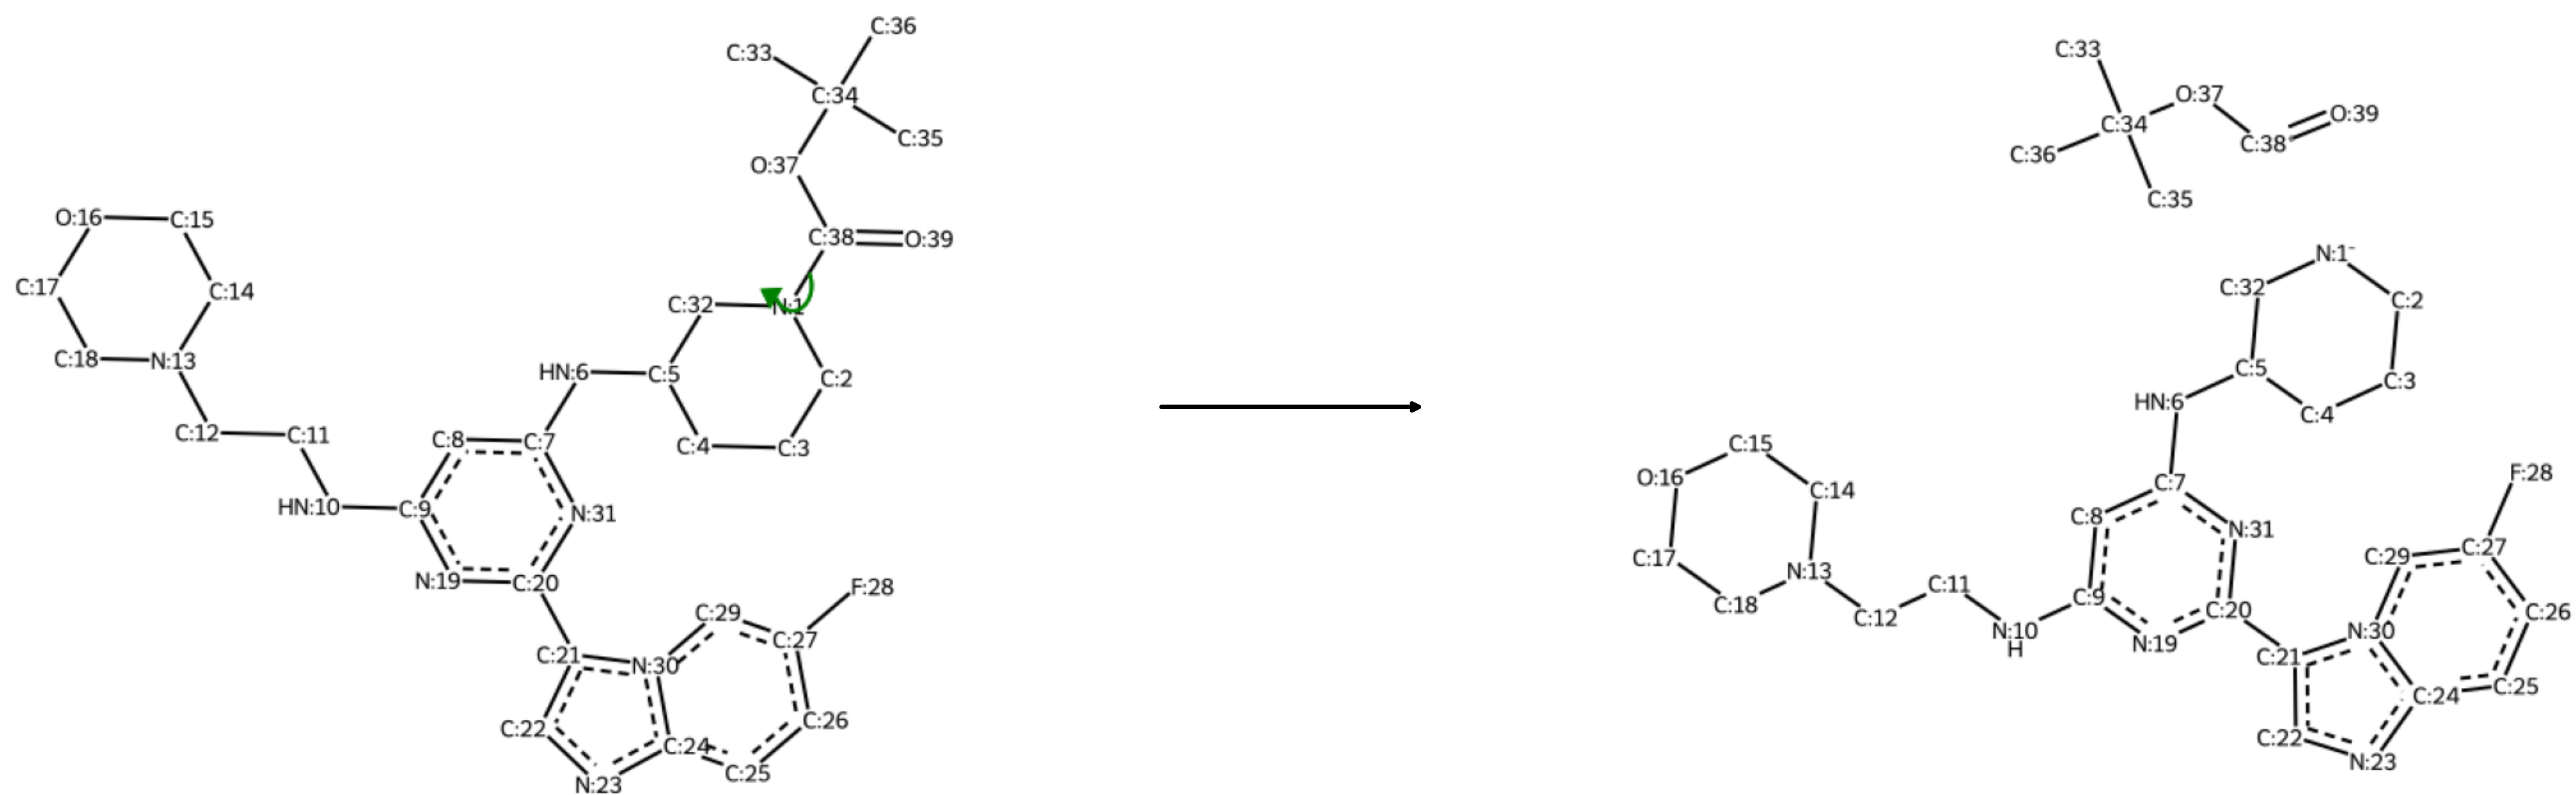



# Original reaction RXN\_ID:46

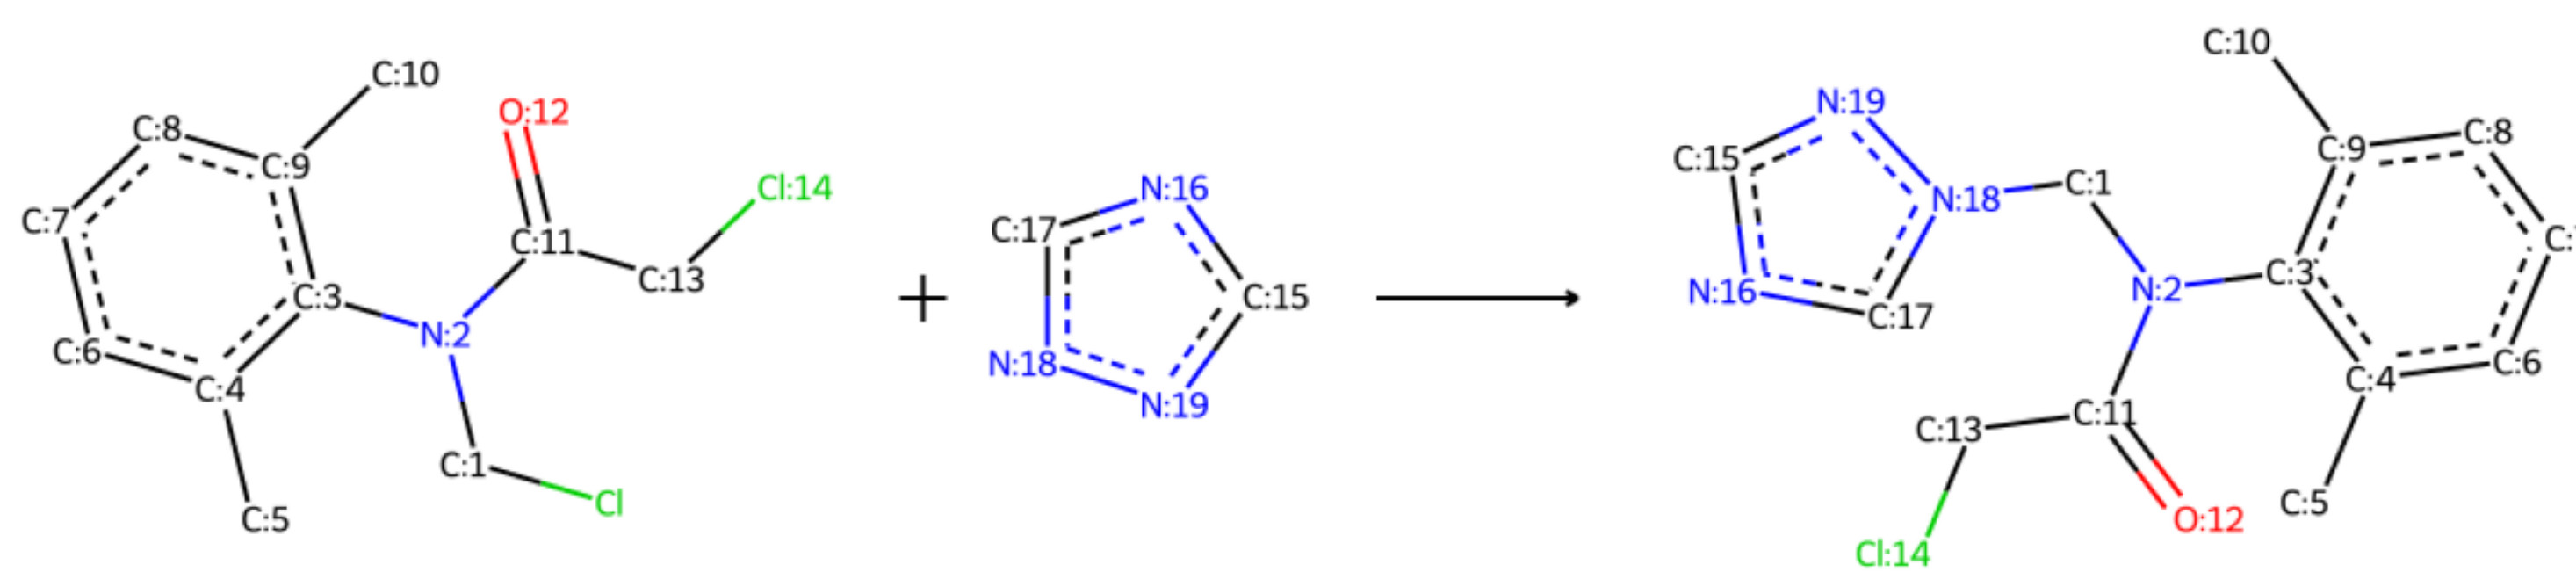

## ELECTRO-generated mechanistic pathway

[Arrow order: (1) green, (2) blue, (3) red, (4) orange]

step #1

Product(s)

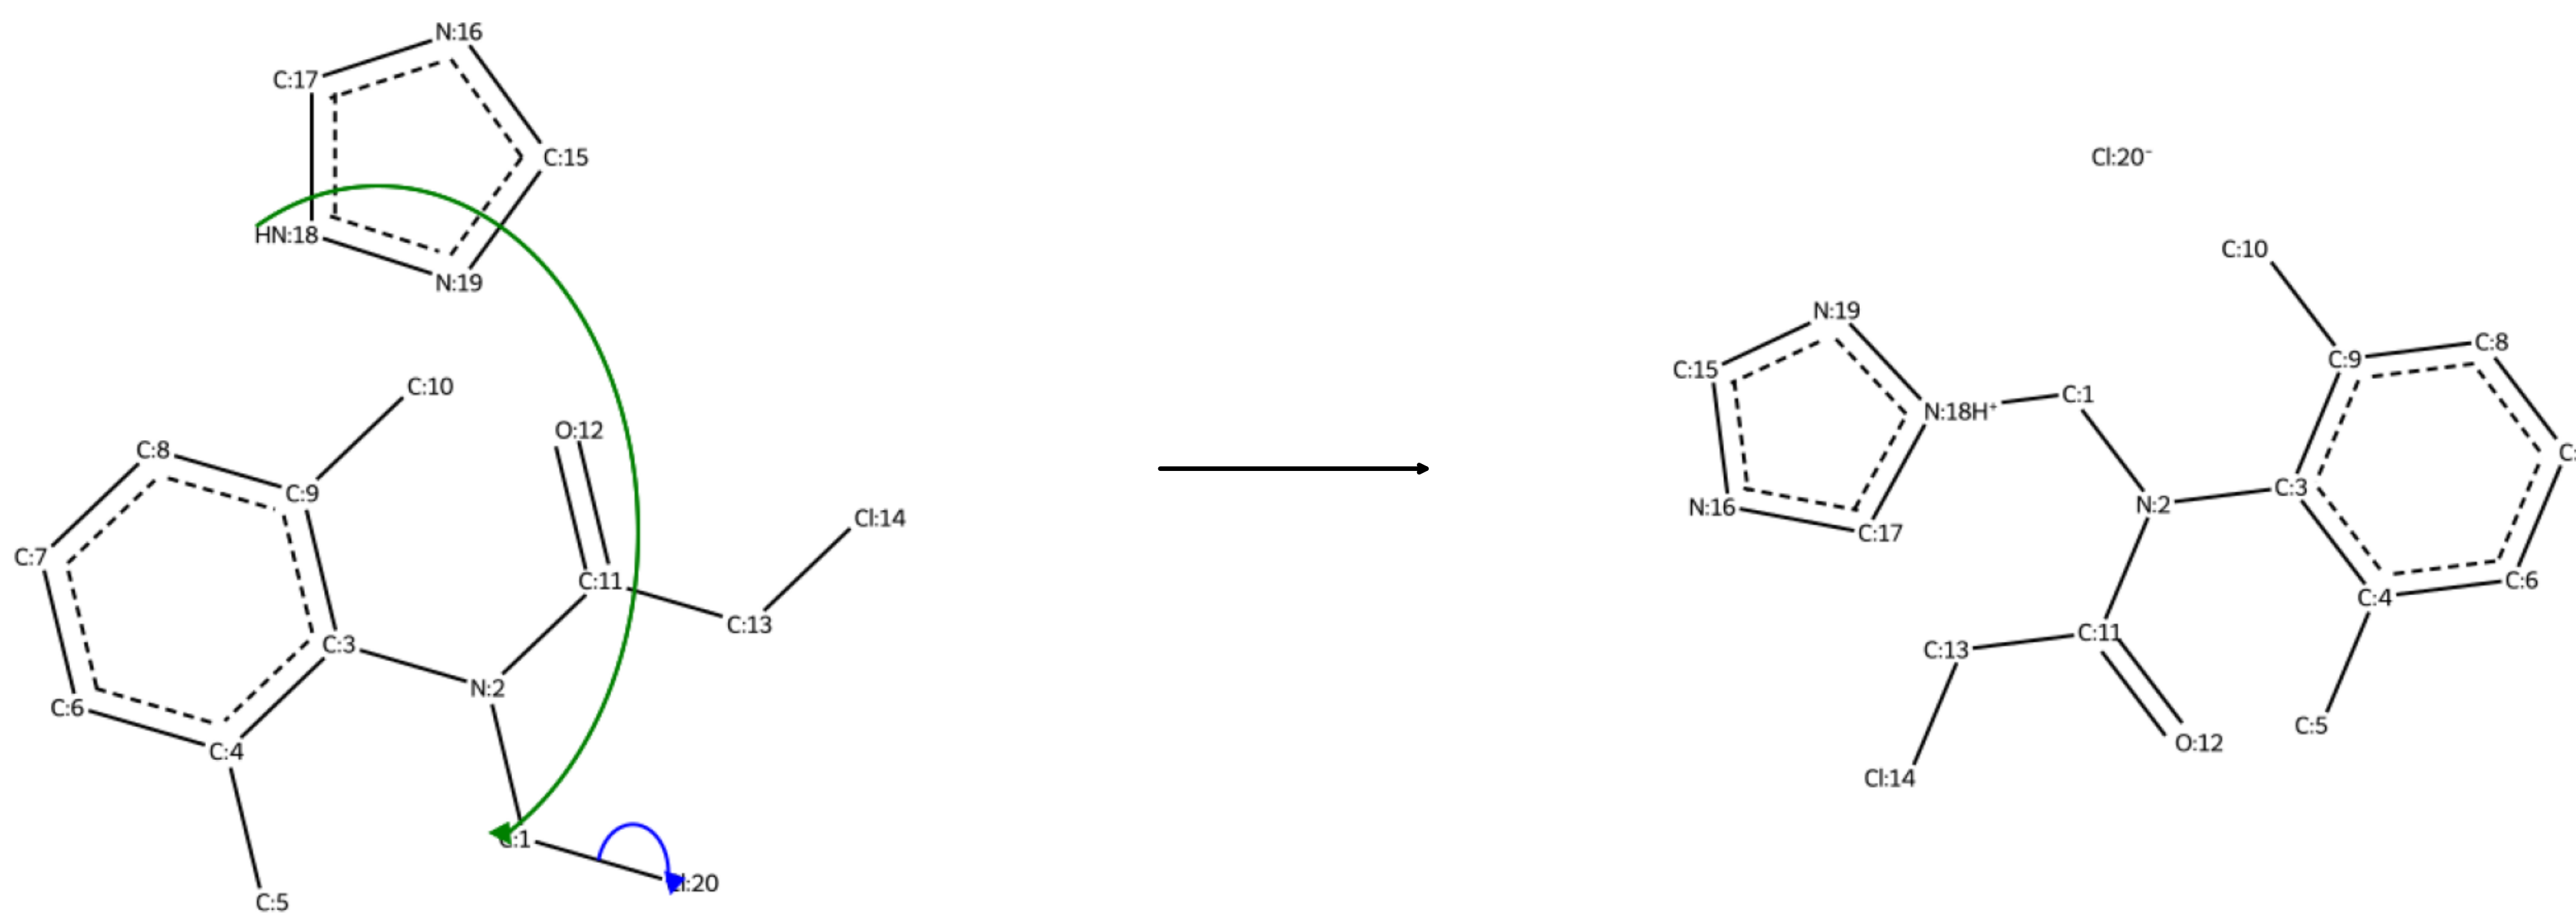

# Original reaction RXN\_ID:47

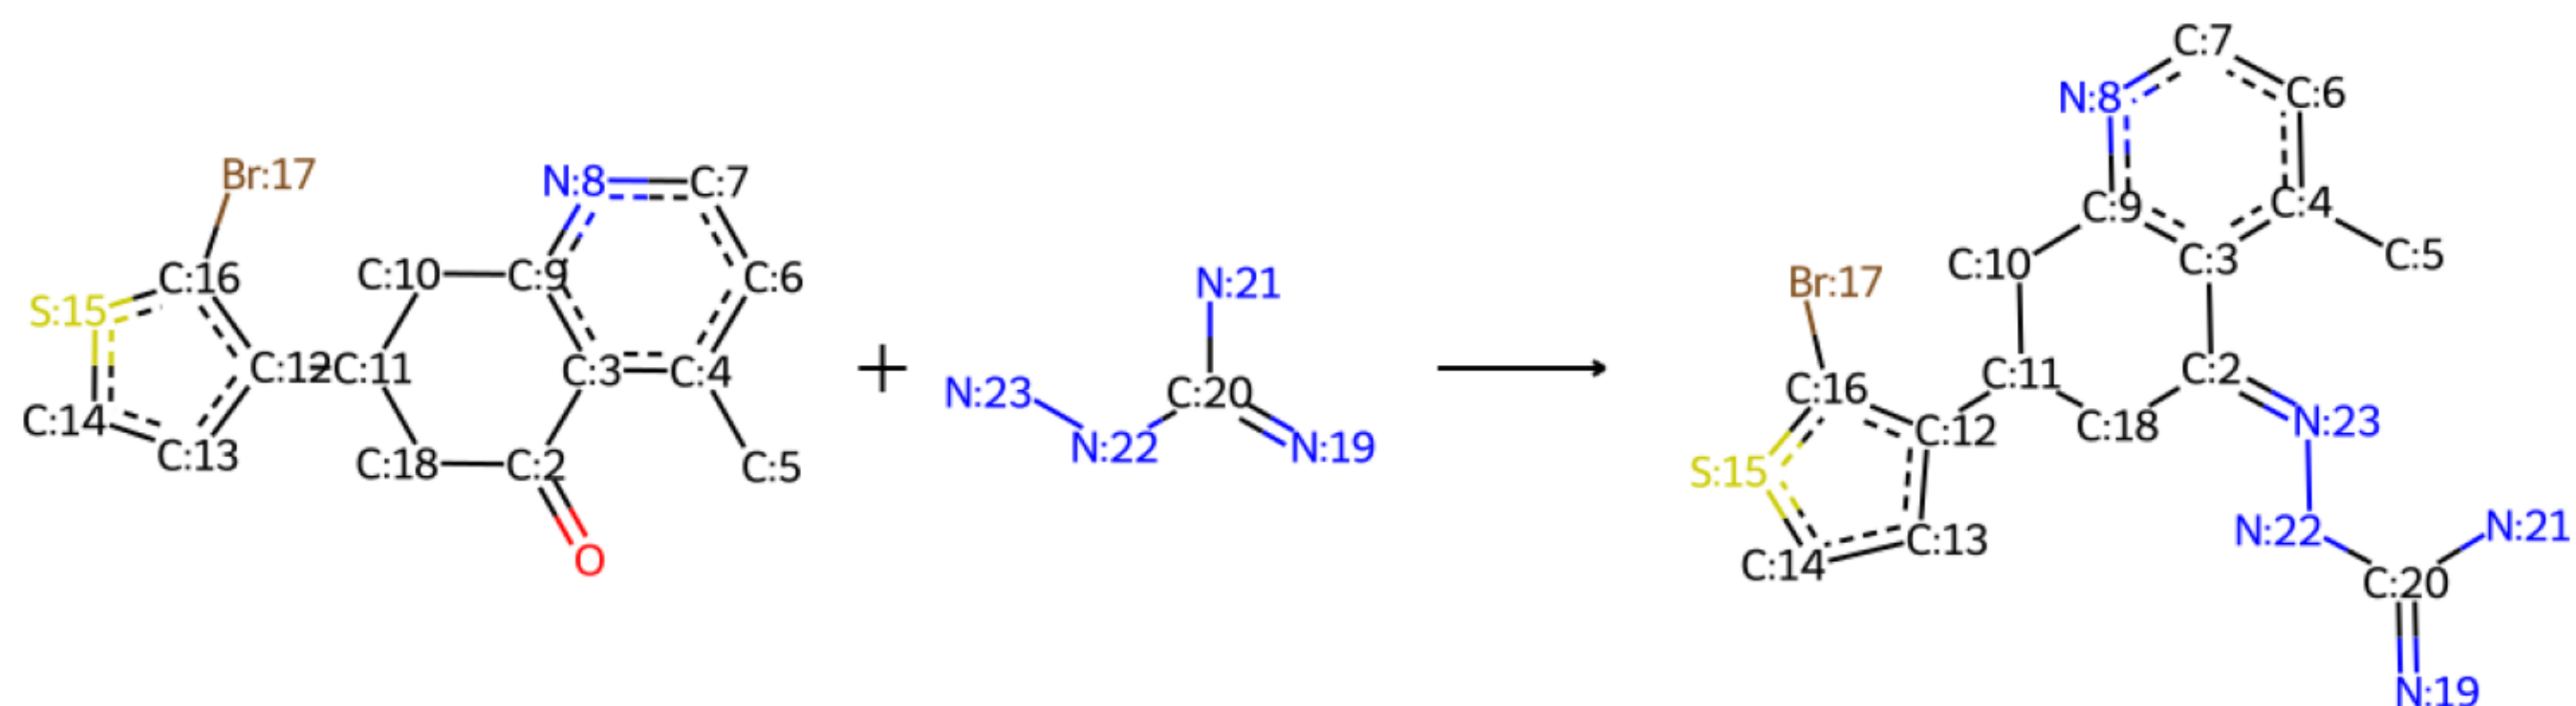

## ELECTRO-generated mechanistic pathway

[Arrow order: (1) green, (2) blue, (3) red, (4) orange]

step #1

Product(s)

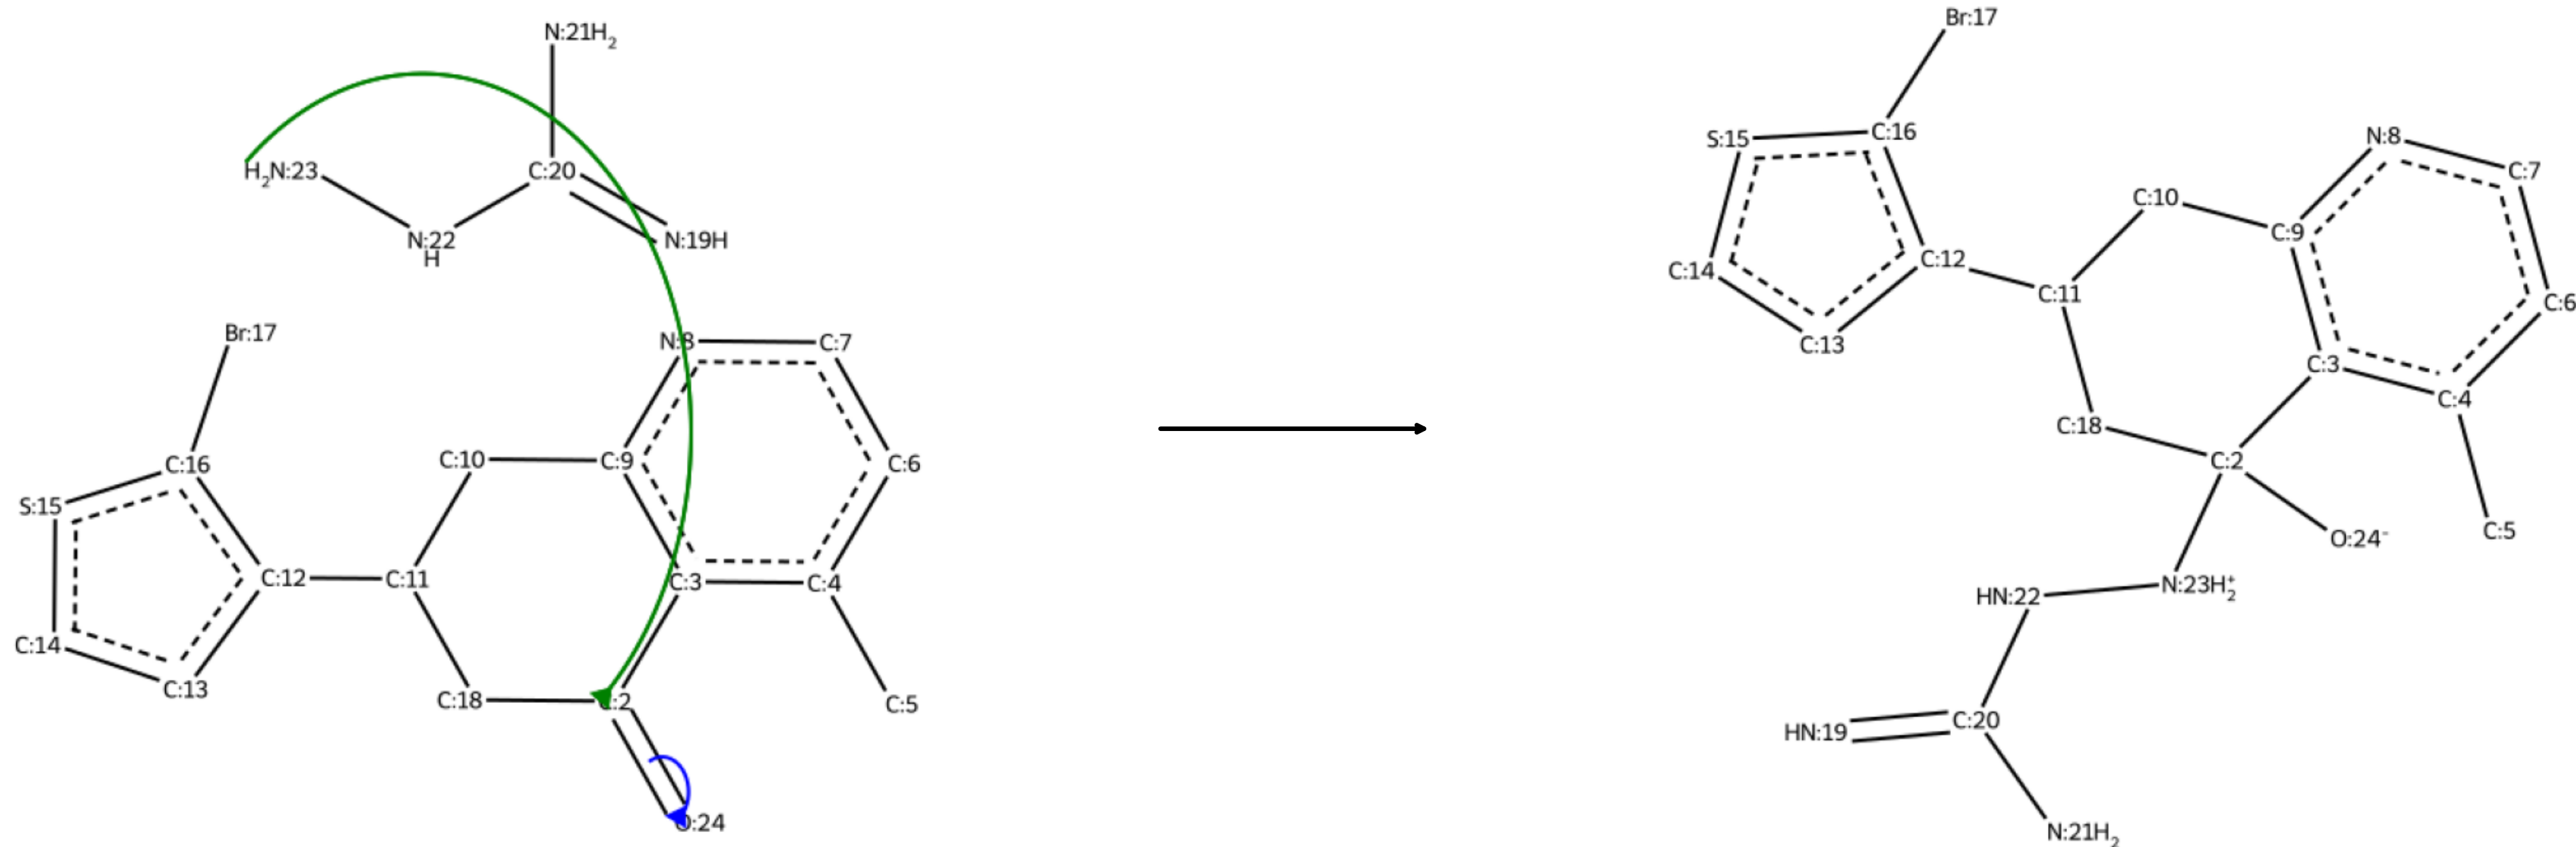



# Original reaction RXN\_ID:48

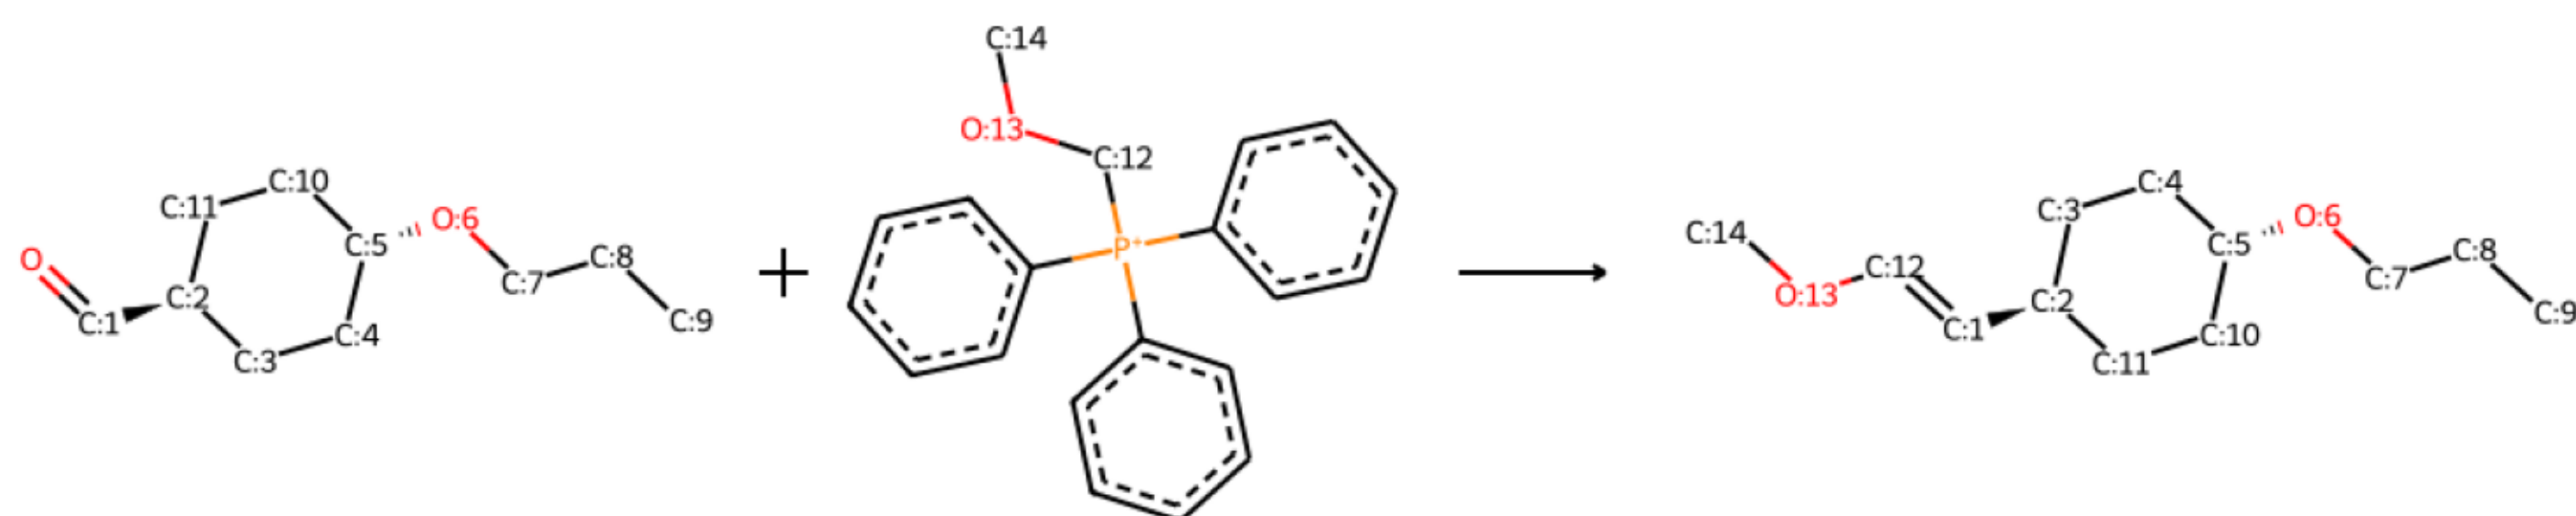

## ELECTRO-generated mechanistic pathway

[Arrow order: (1) green, (2) blue, (3) red, (4) orange]

step #1

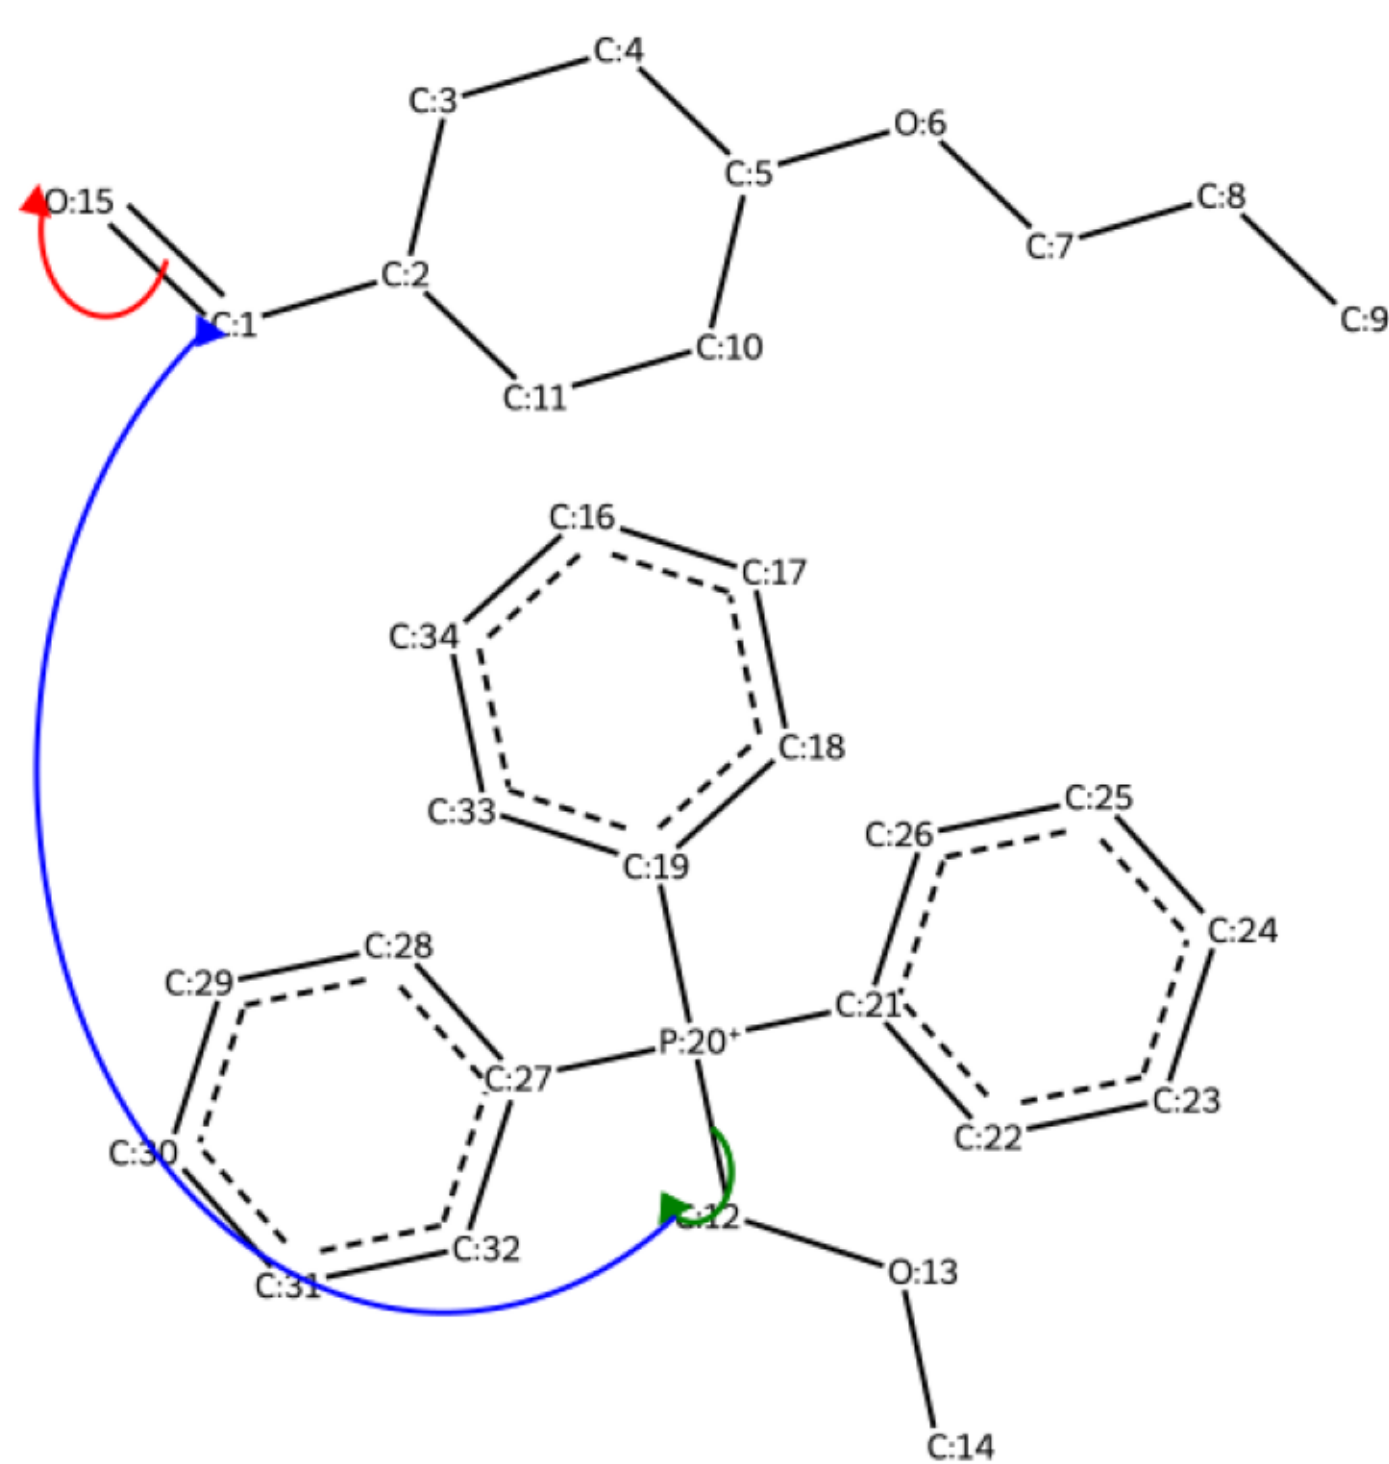

Product(s)

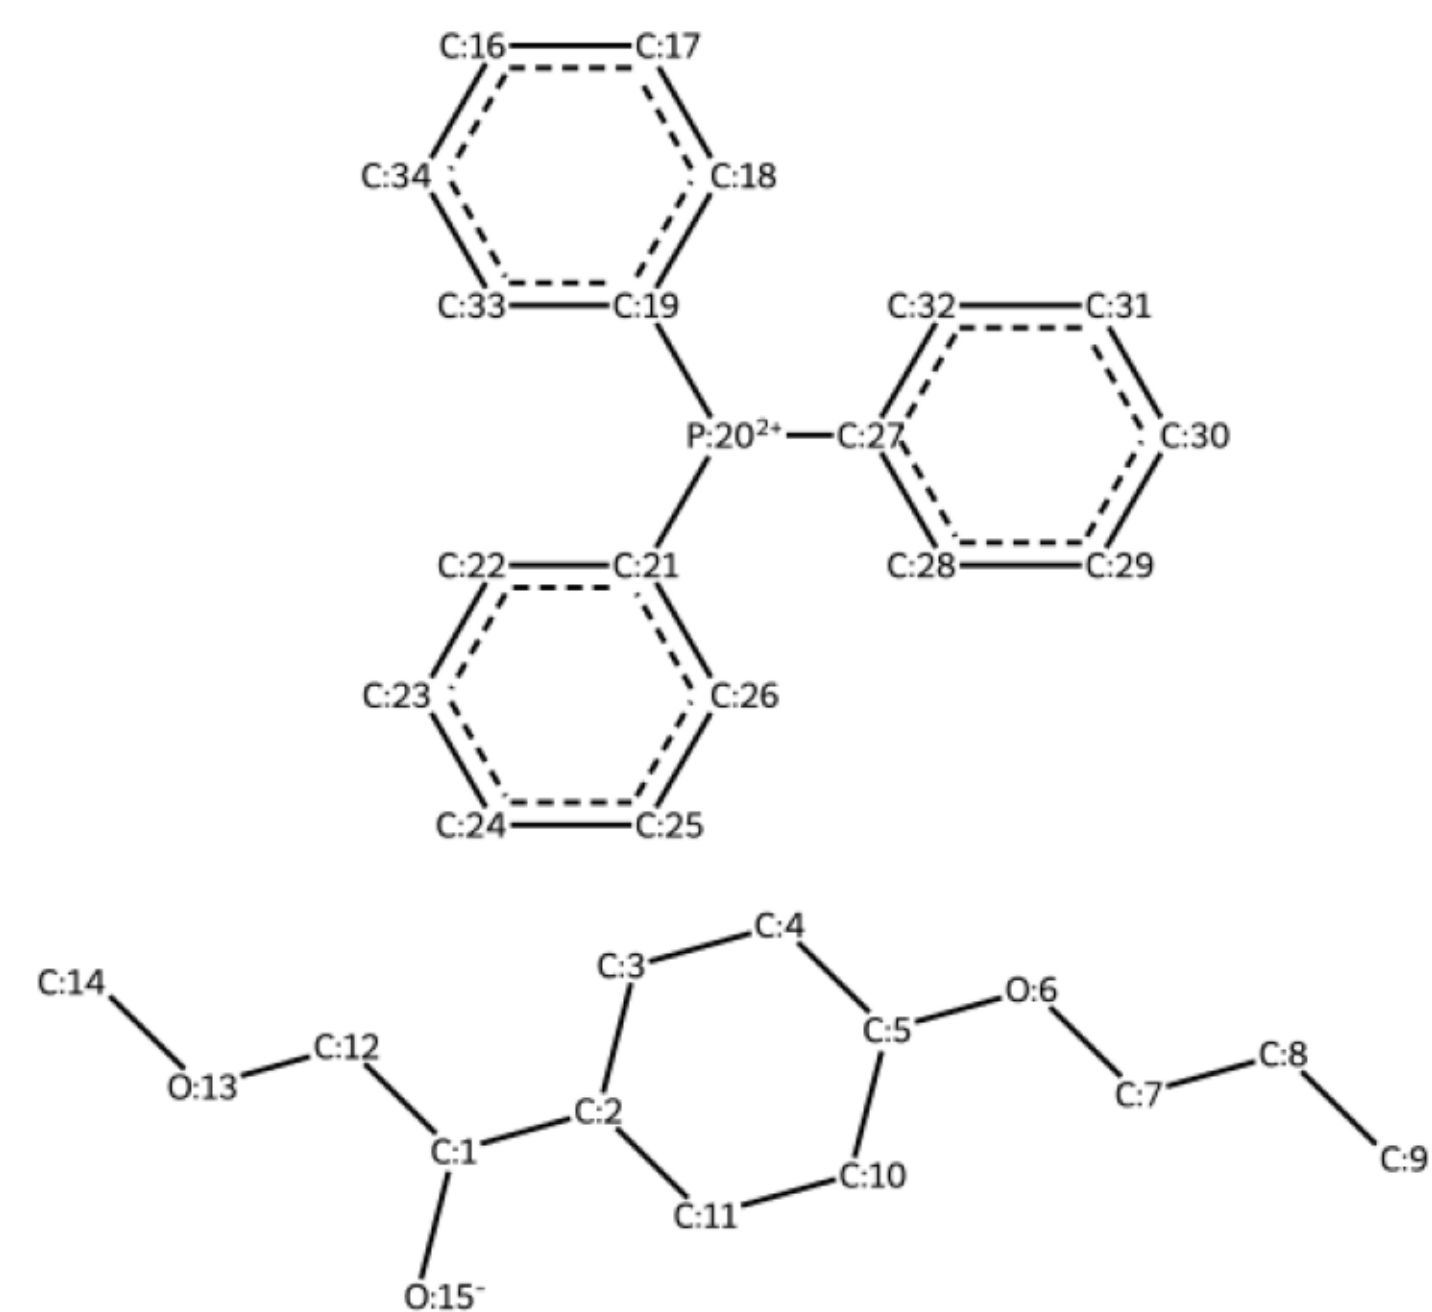

# Original reaction RXN\_ID:49

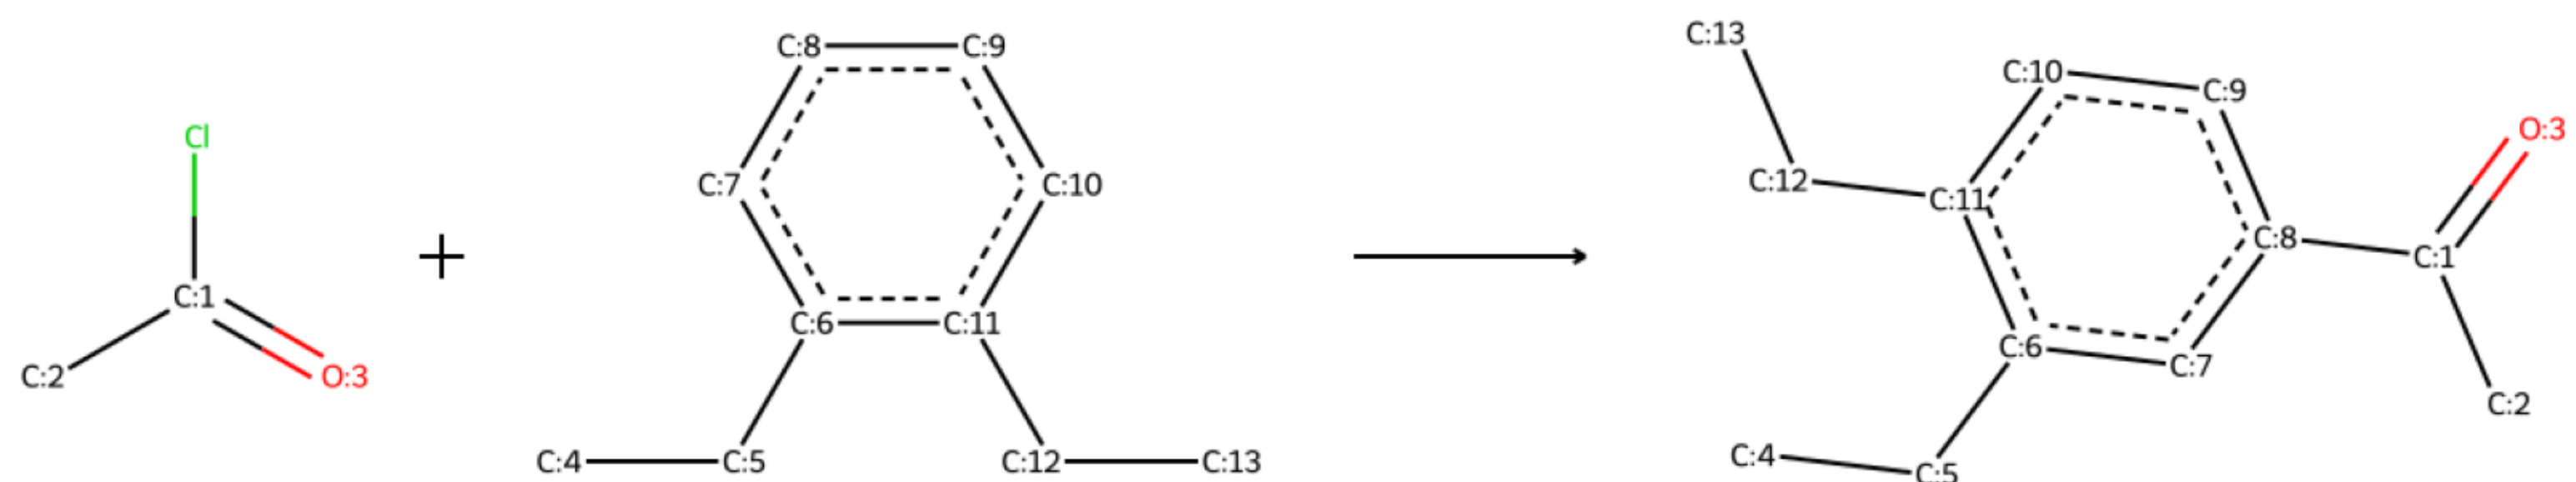

## ELECTRO-generated mechanistic pathway

[Arrow order: (1) green, (2) blue, (3) red, (4) orange]

step #1

Product(s)

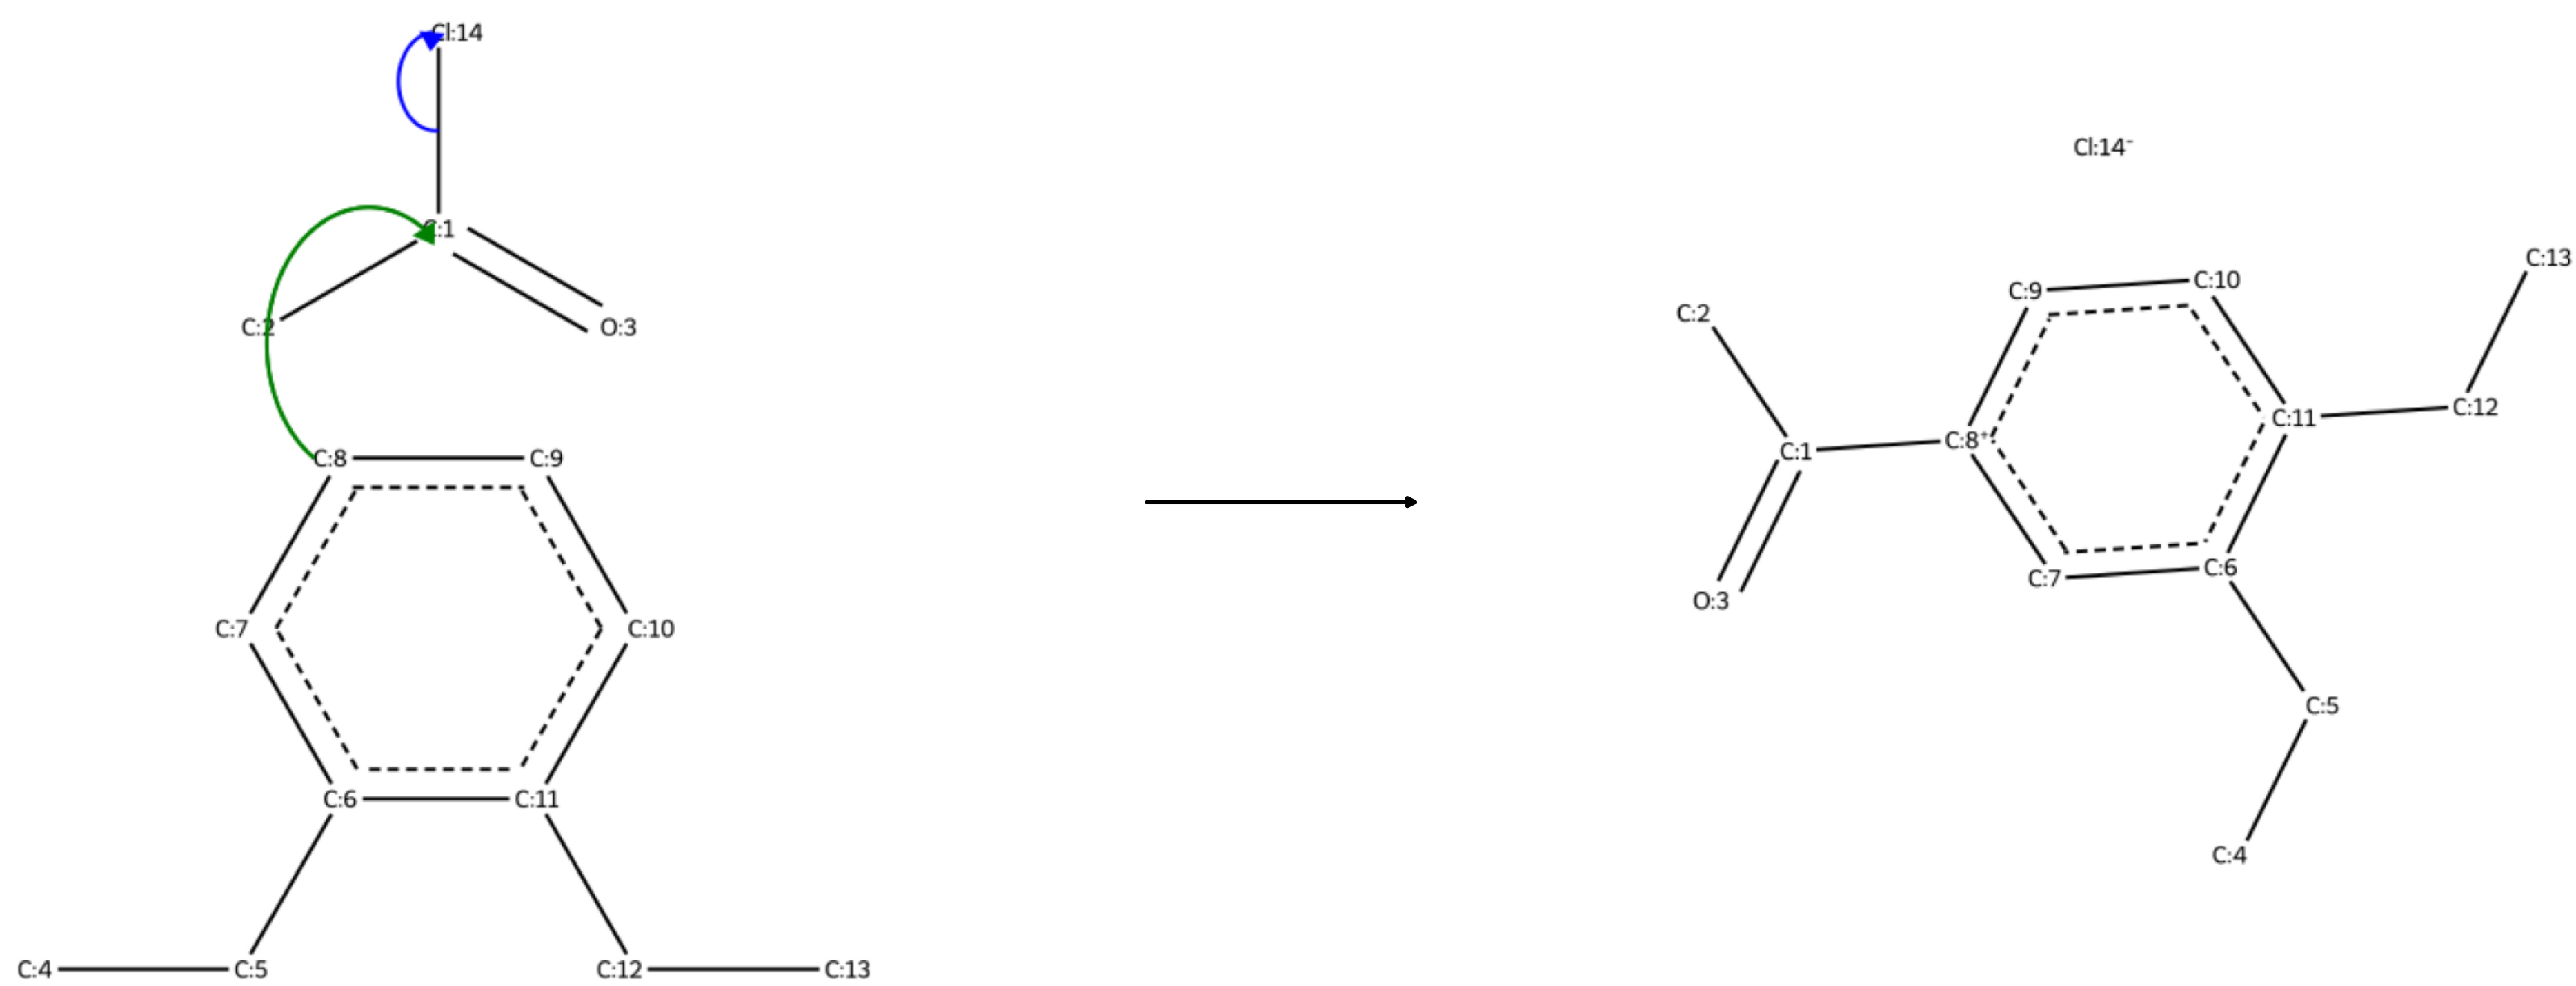



# Original reaction RXN\_ID:50

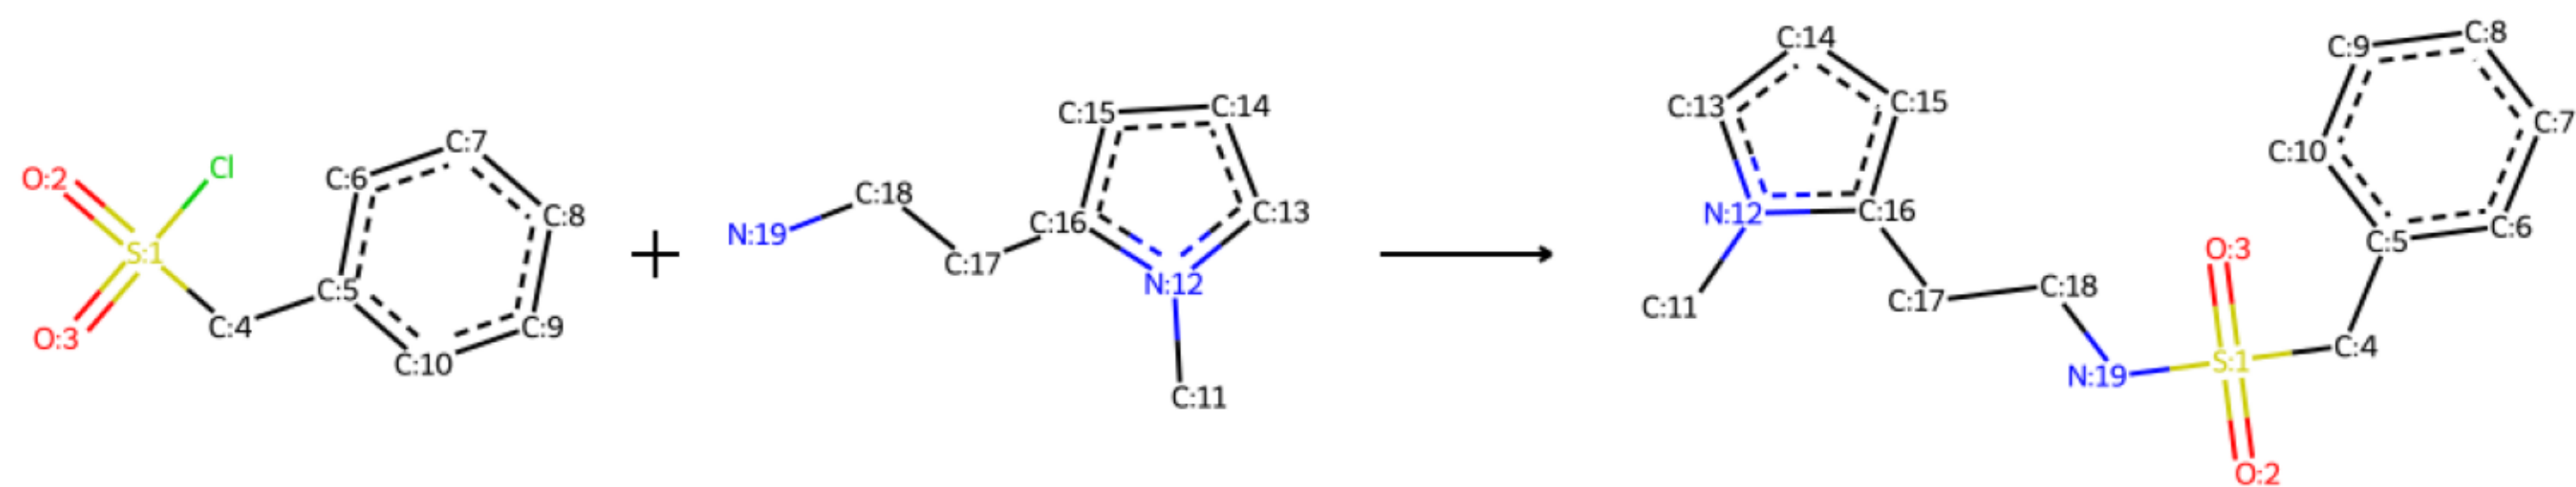

## ELECTRO-generated mechanistic pathway

[Arrow order: (1) green, (2) blue, (3) red, (4) orange]

step #1

Product(s)

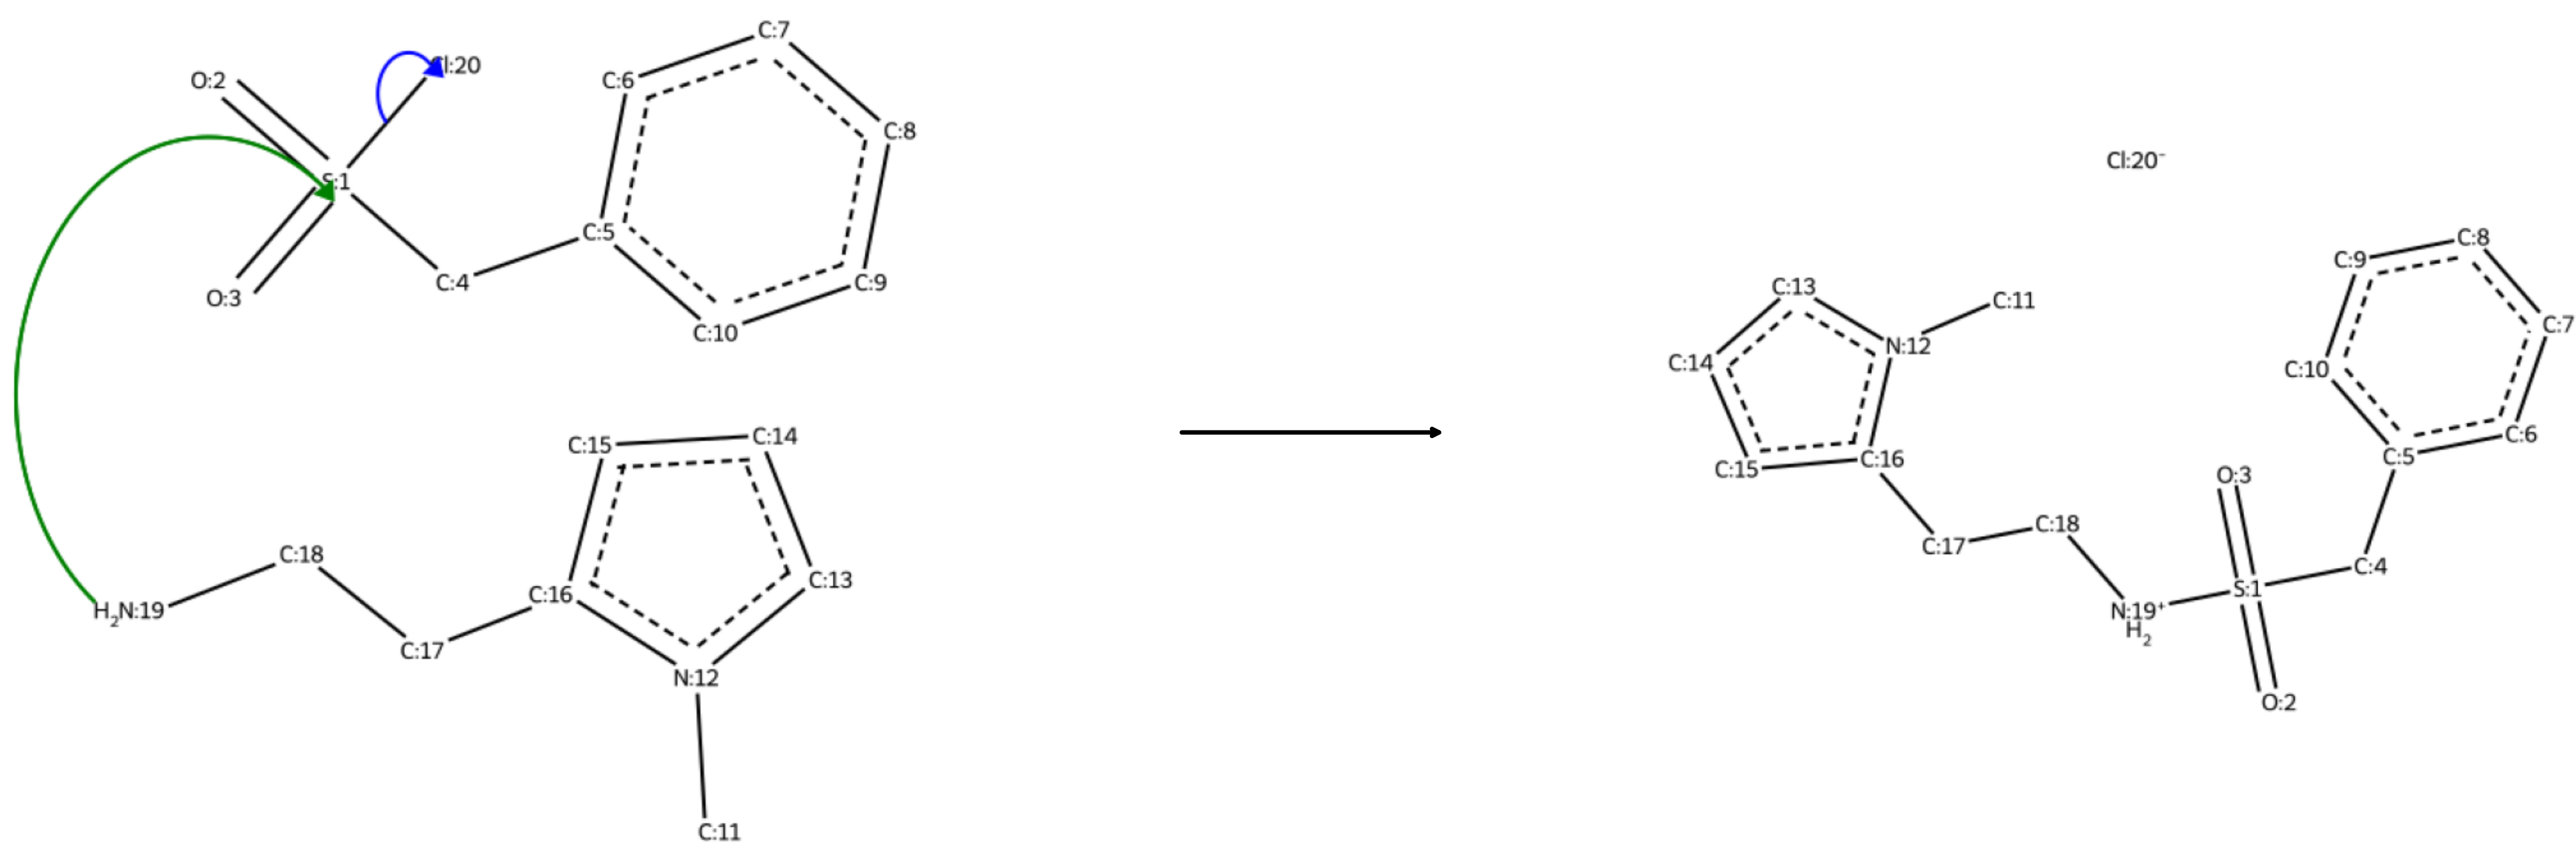

# Original reaction RXN\_ID:51

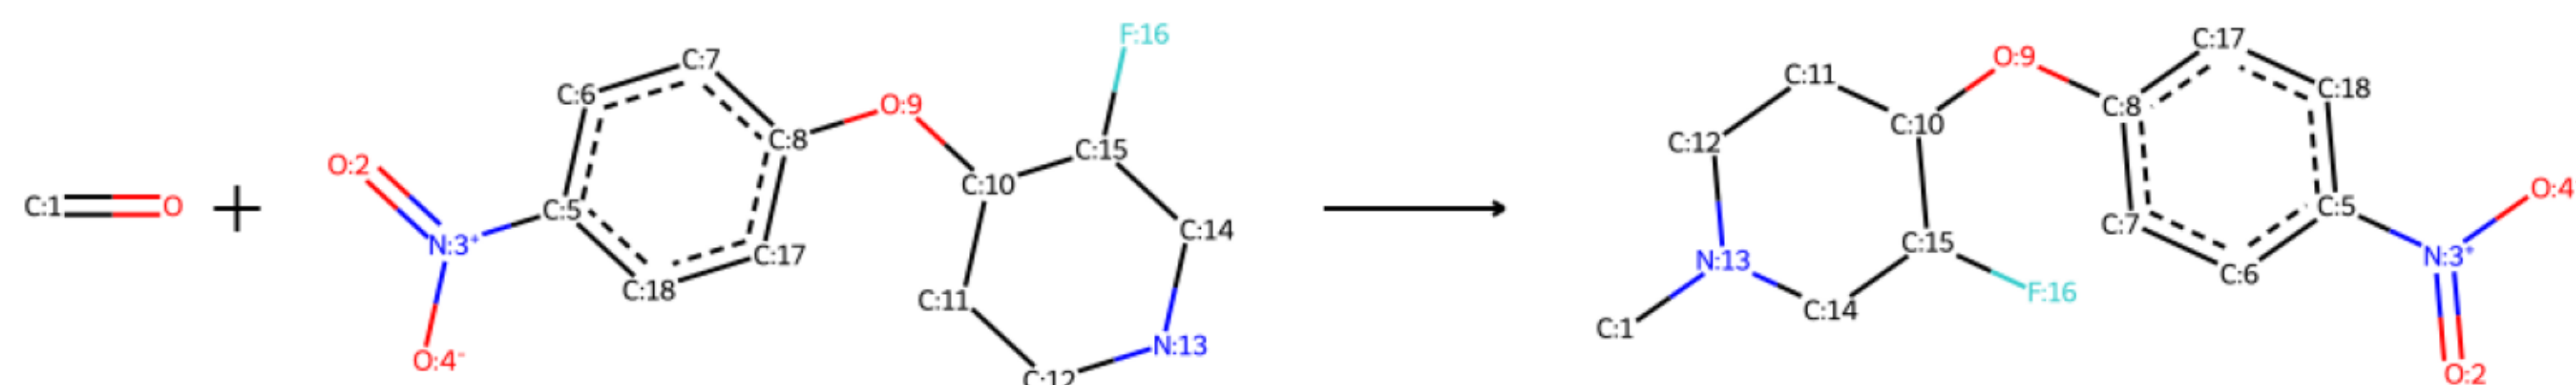

## ELECTRO-generated mechanistic pathway

[Arrow order: (1) green, (2) blue, (3) red, (4) orange]

step #1

Product(s)

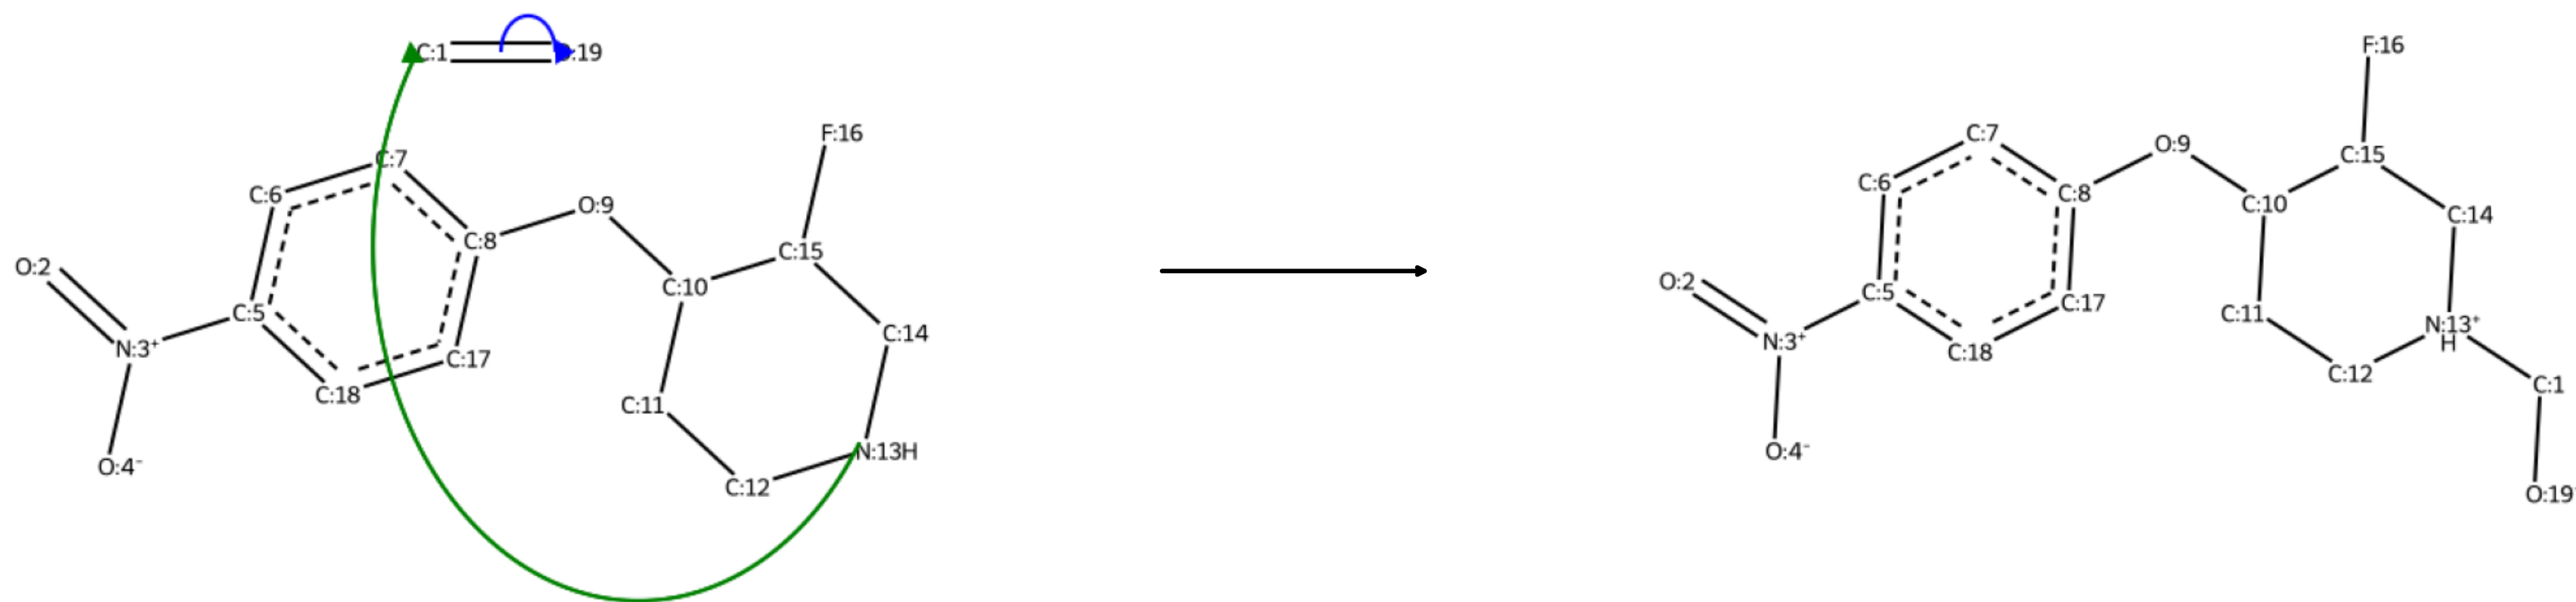



# Original reaction RXN\_ID:52

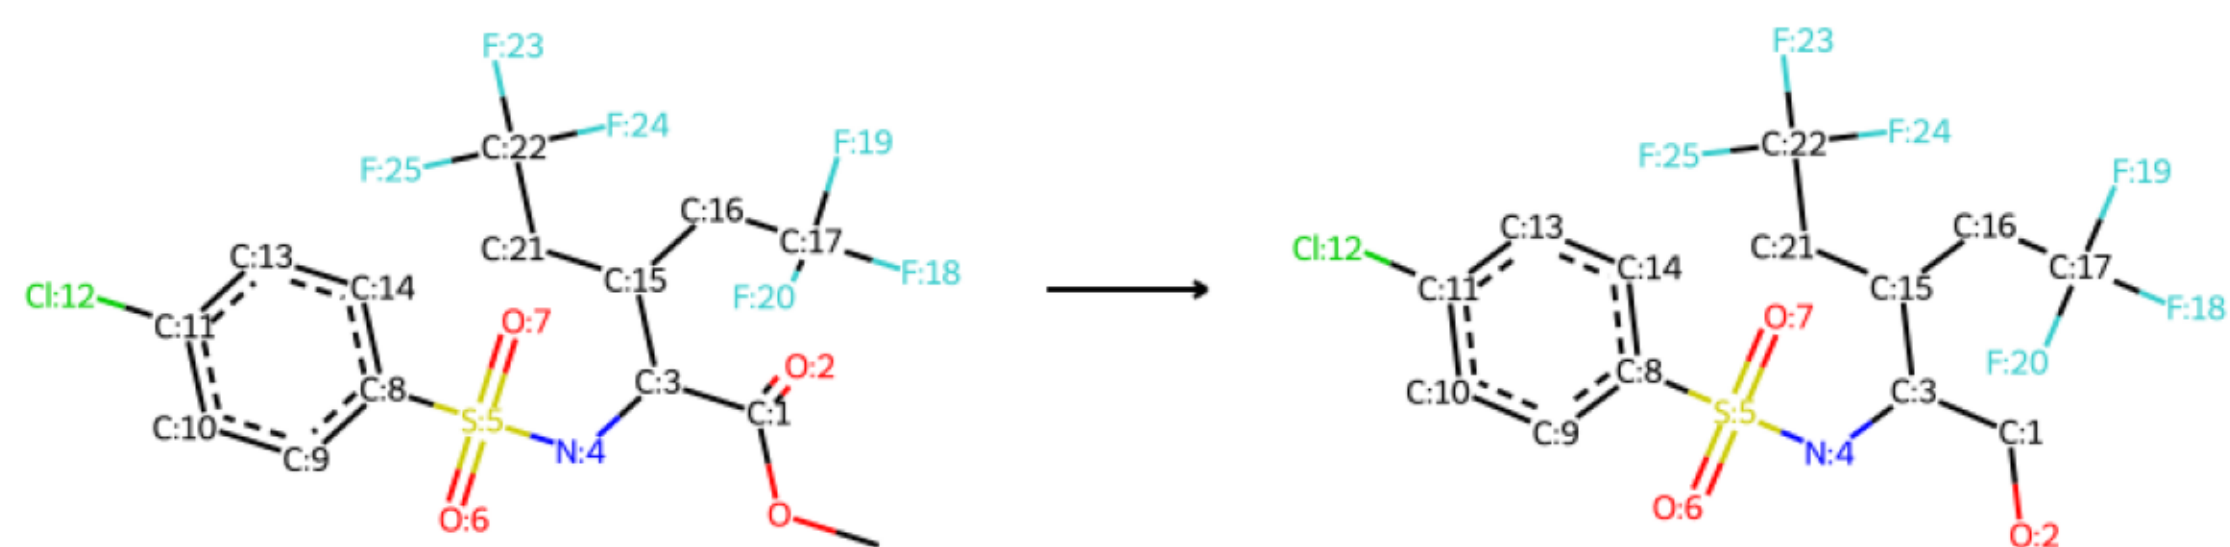

## ELECTRO-generated mechanistic pathway

[Arrow order: (1) green, (2) blue, (3) red, (4) orange]

step #1

Product(s)

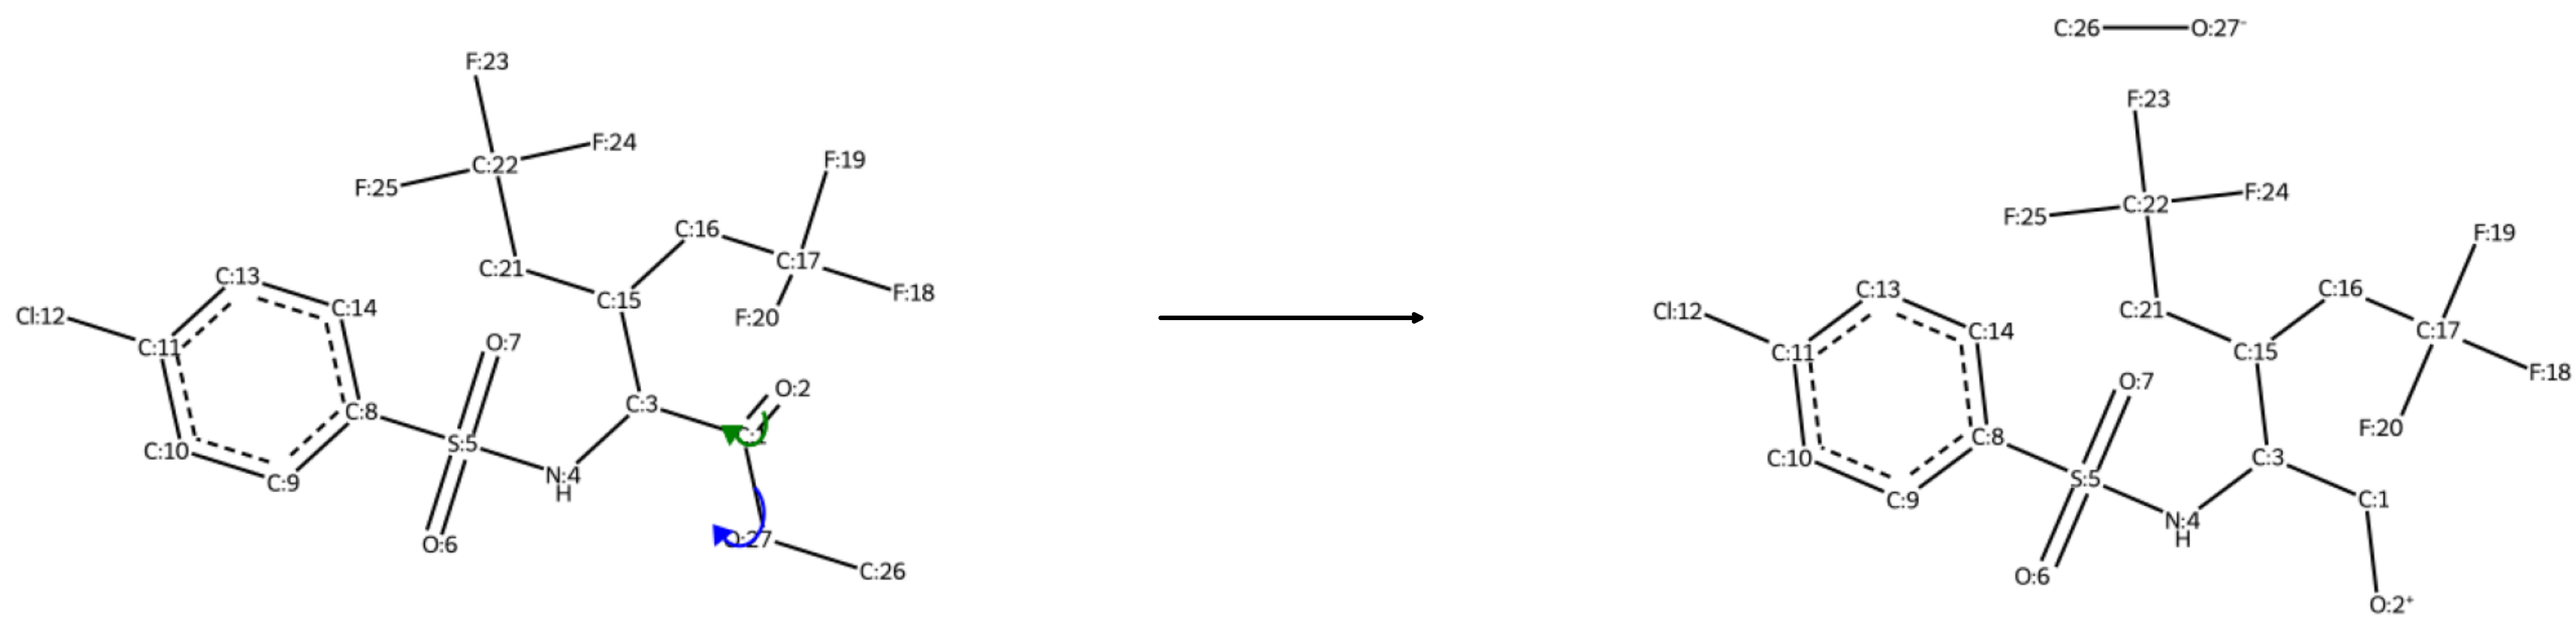

# Original reaction RXN\_ID:53

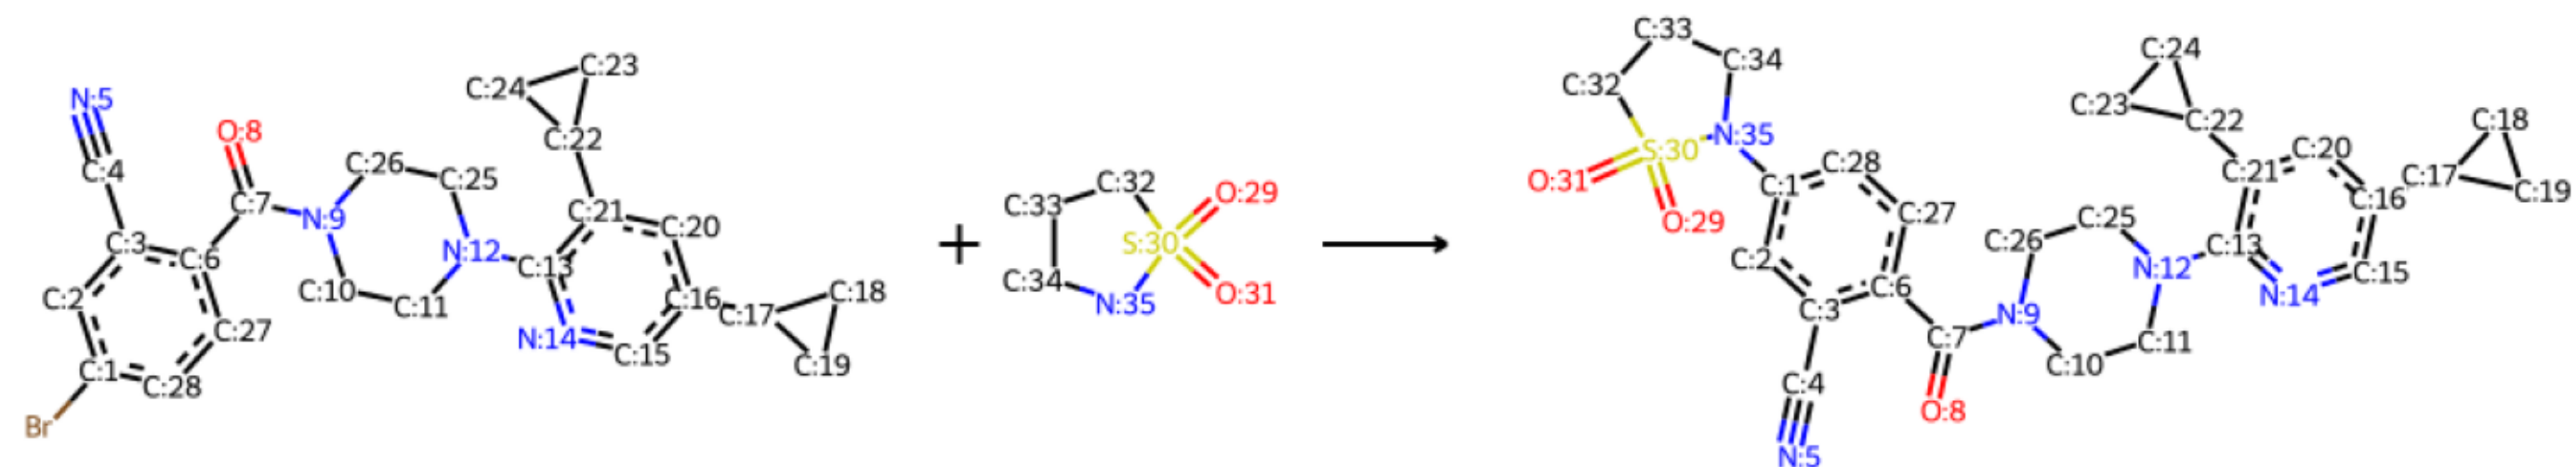

## ELECTRO-generated mechanistic pathway

[Arrow order: (1) green, (2) blue, (3) red, (4) orange]

step #1

Product(s)

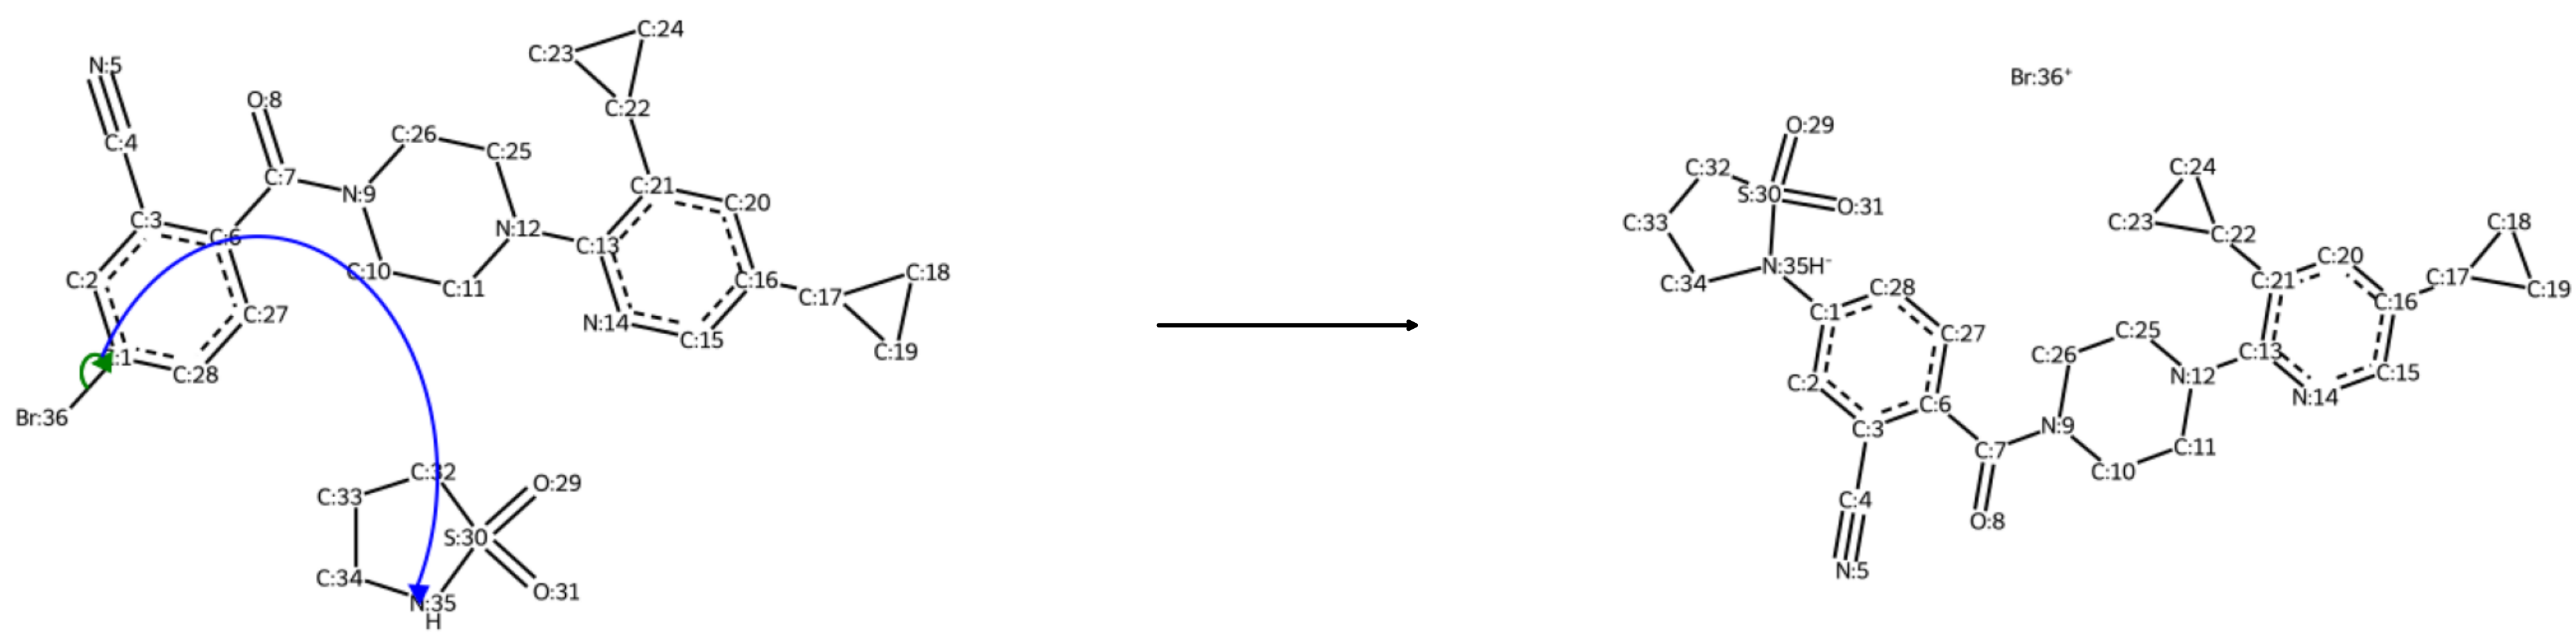



# Original reaction RXN\_ID:54

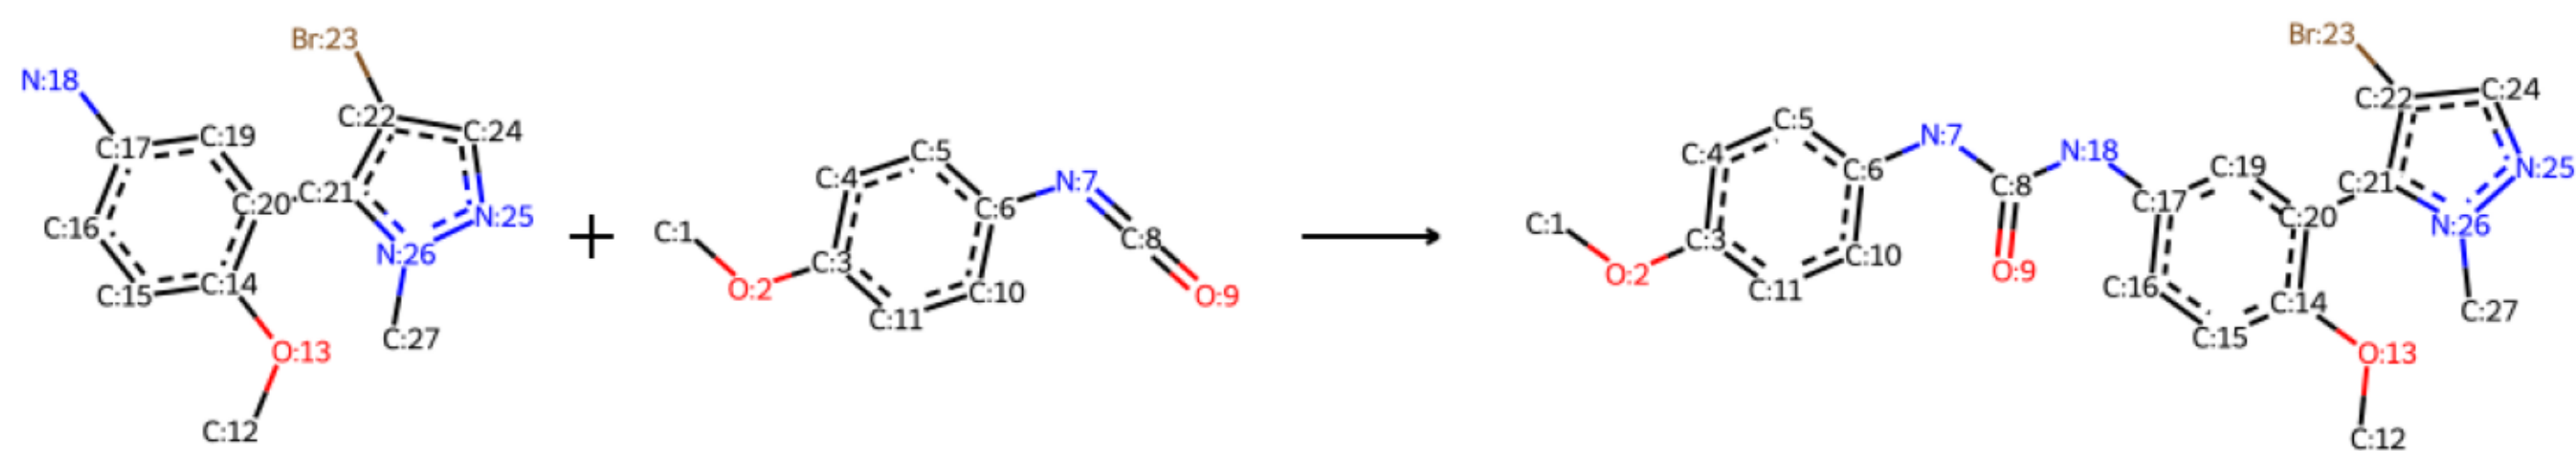

## ELECTRO-generated mechanistic pathway

[Arrow order: (1) green, (2) blue, (3) red, (4) orange]

step #1

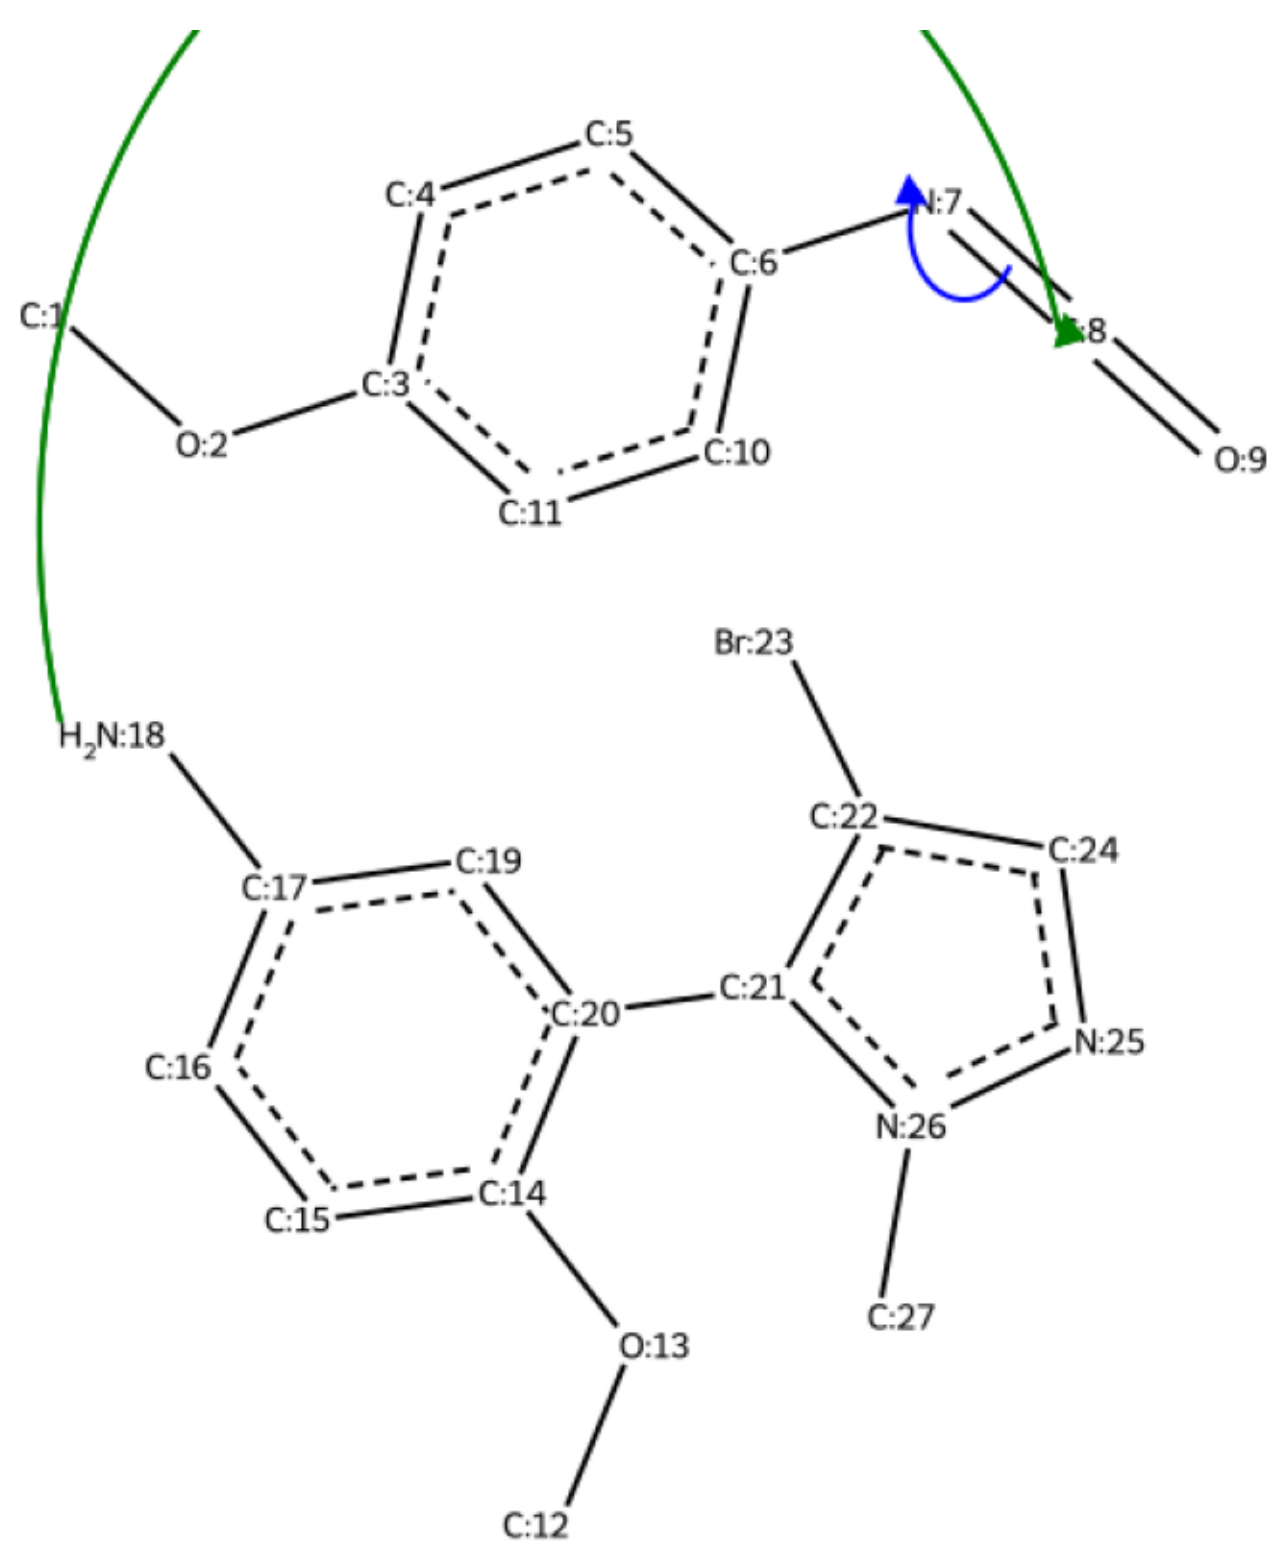

Product(s)

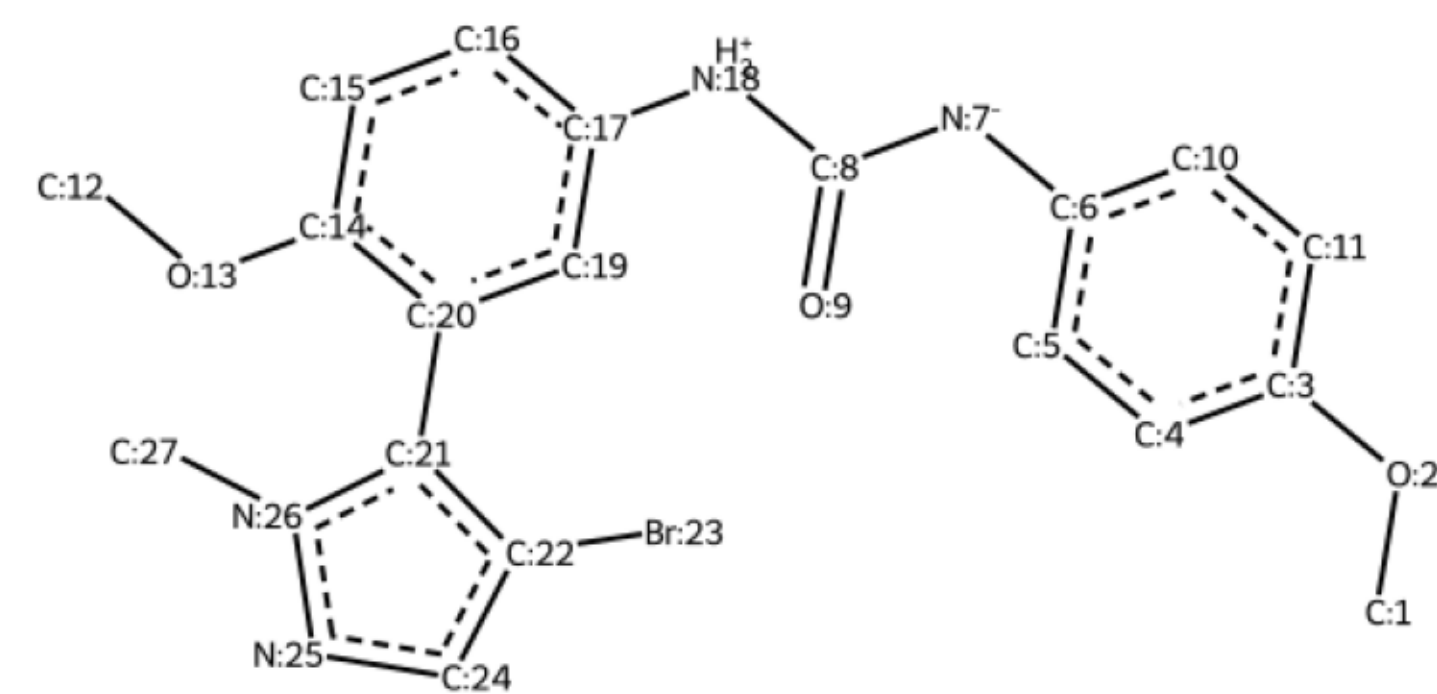

# Original reaction RXN\_ID:55

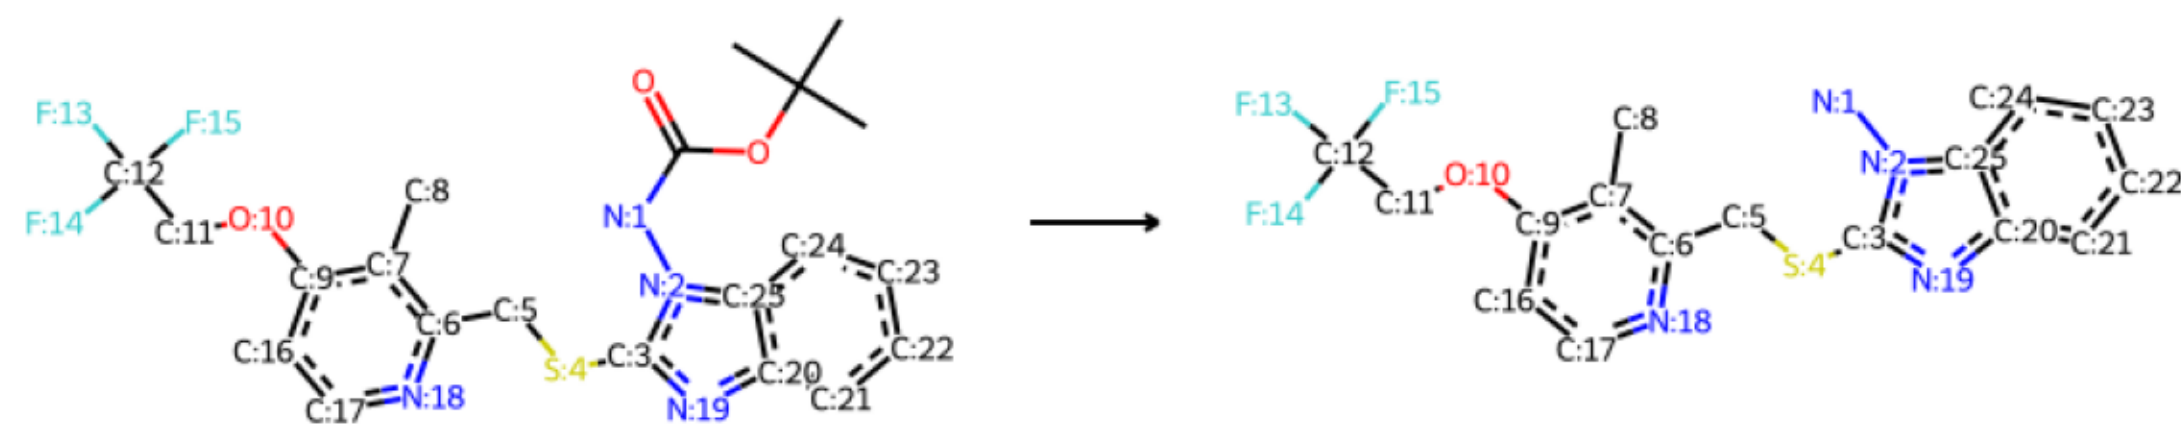

## ELECTRO-generated mechanistic pathway

[Arrow order: (1) green, (2) blue, (3) red, (4) orange]

step #1

Product(s)

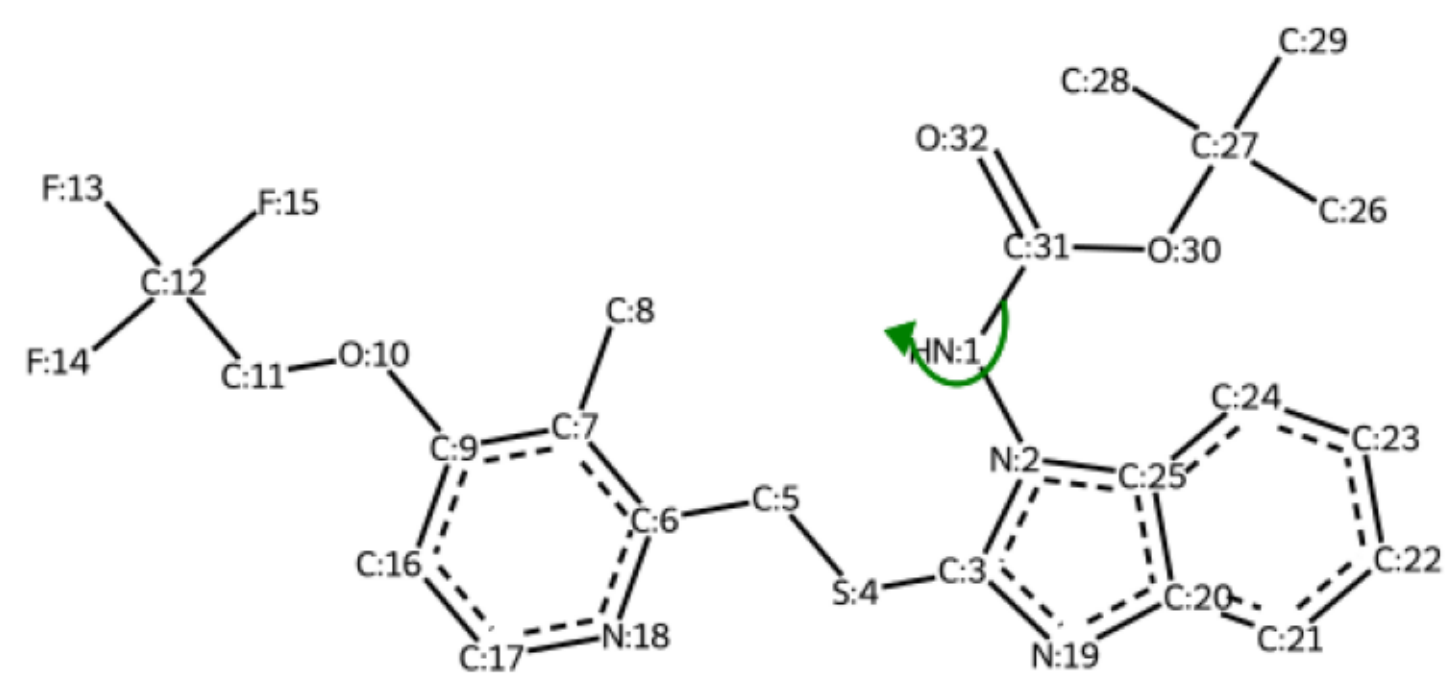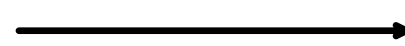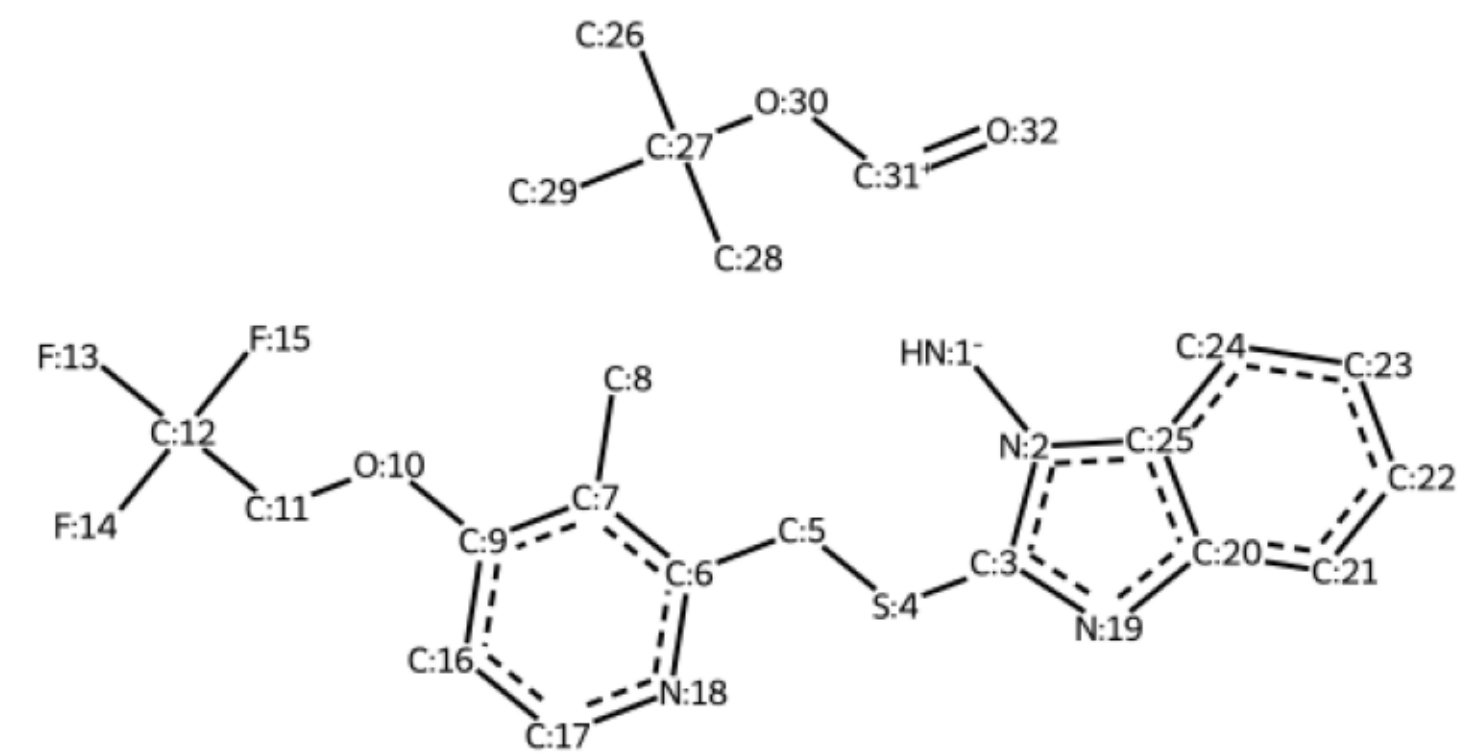



# Original reaction RXN\_ID:56

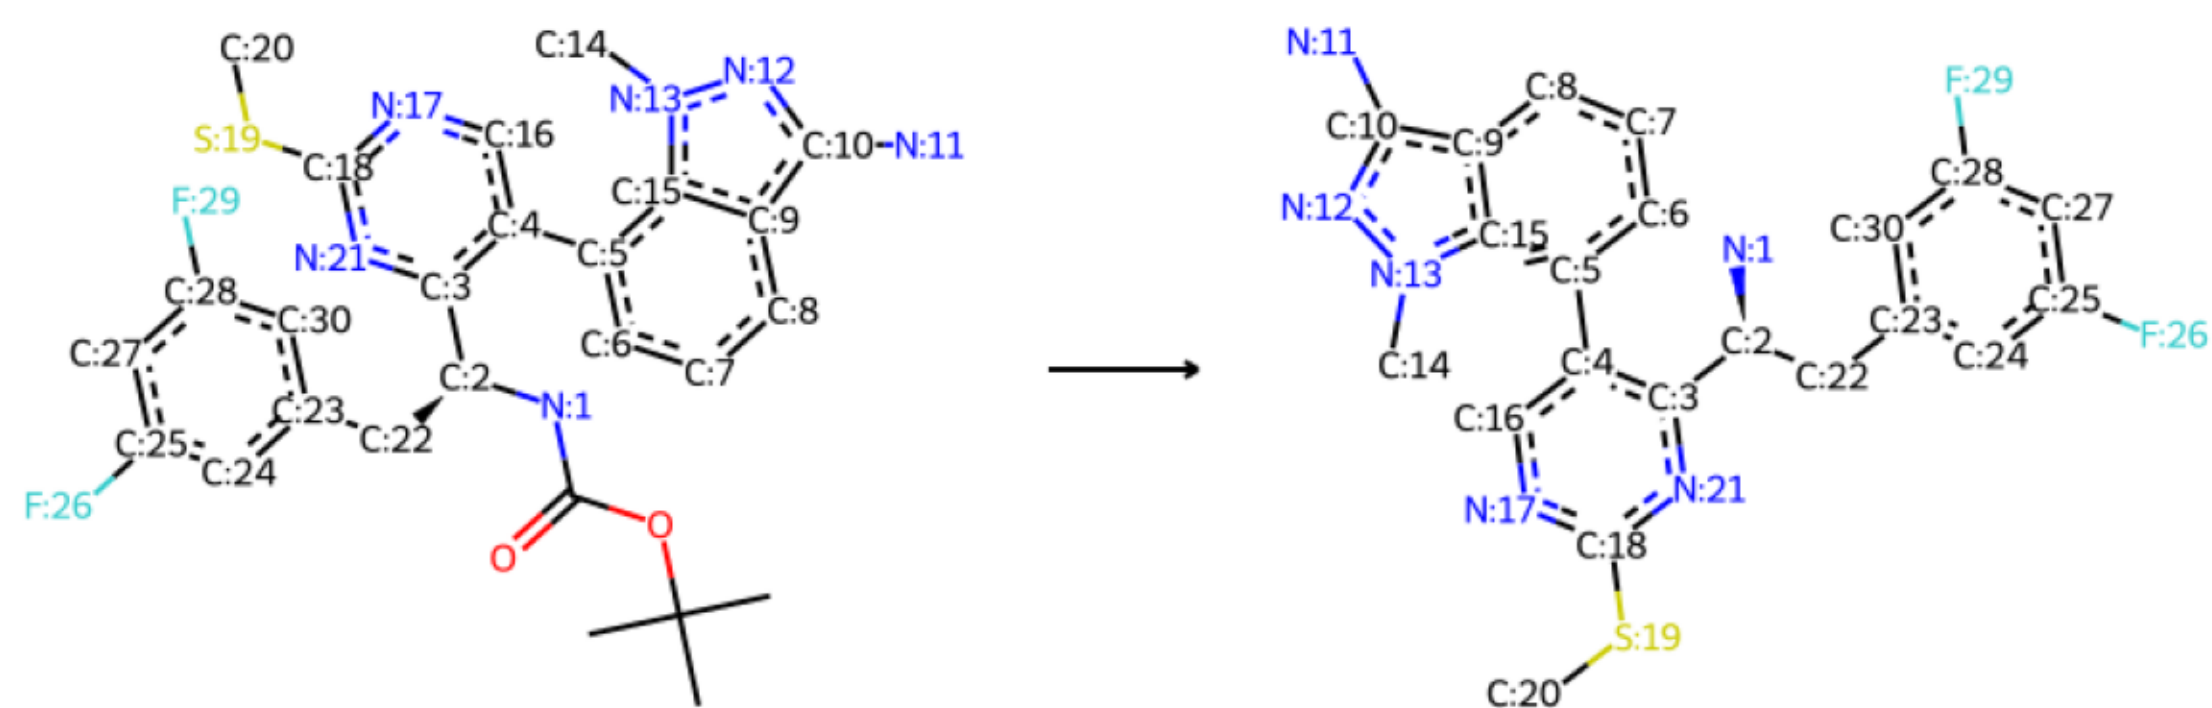

## ELECTRO-generated mechanistic pathway

[Arrow order: (1) green, (2) blue, (3) red, (4) orange]

step #1

Product(s)

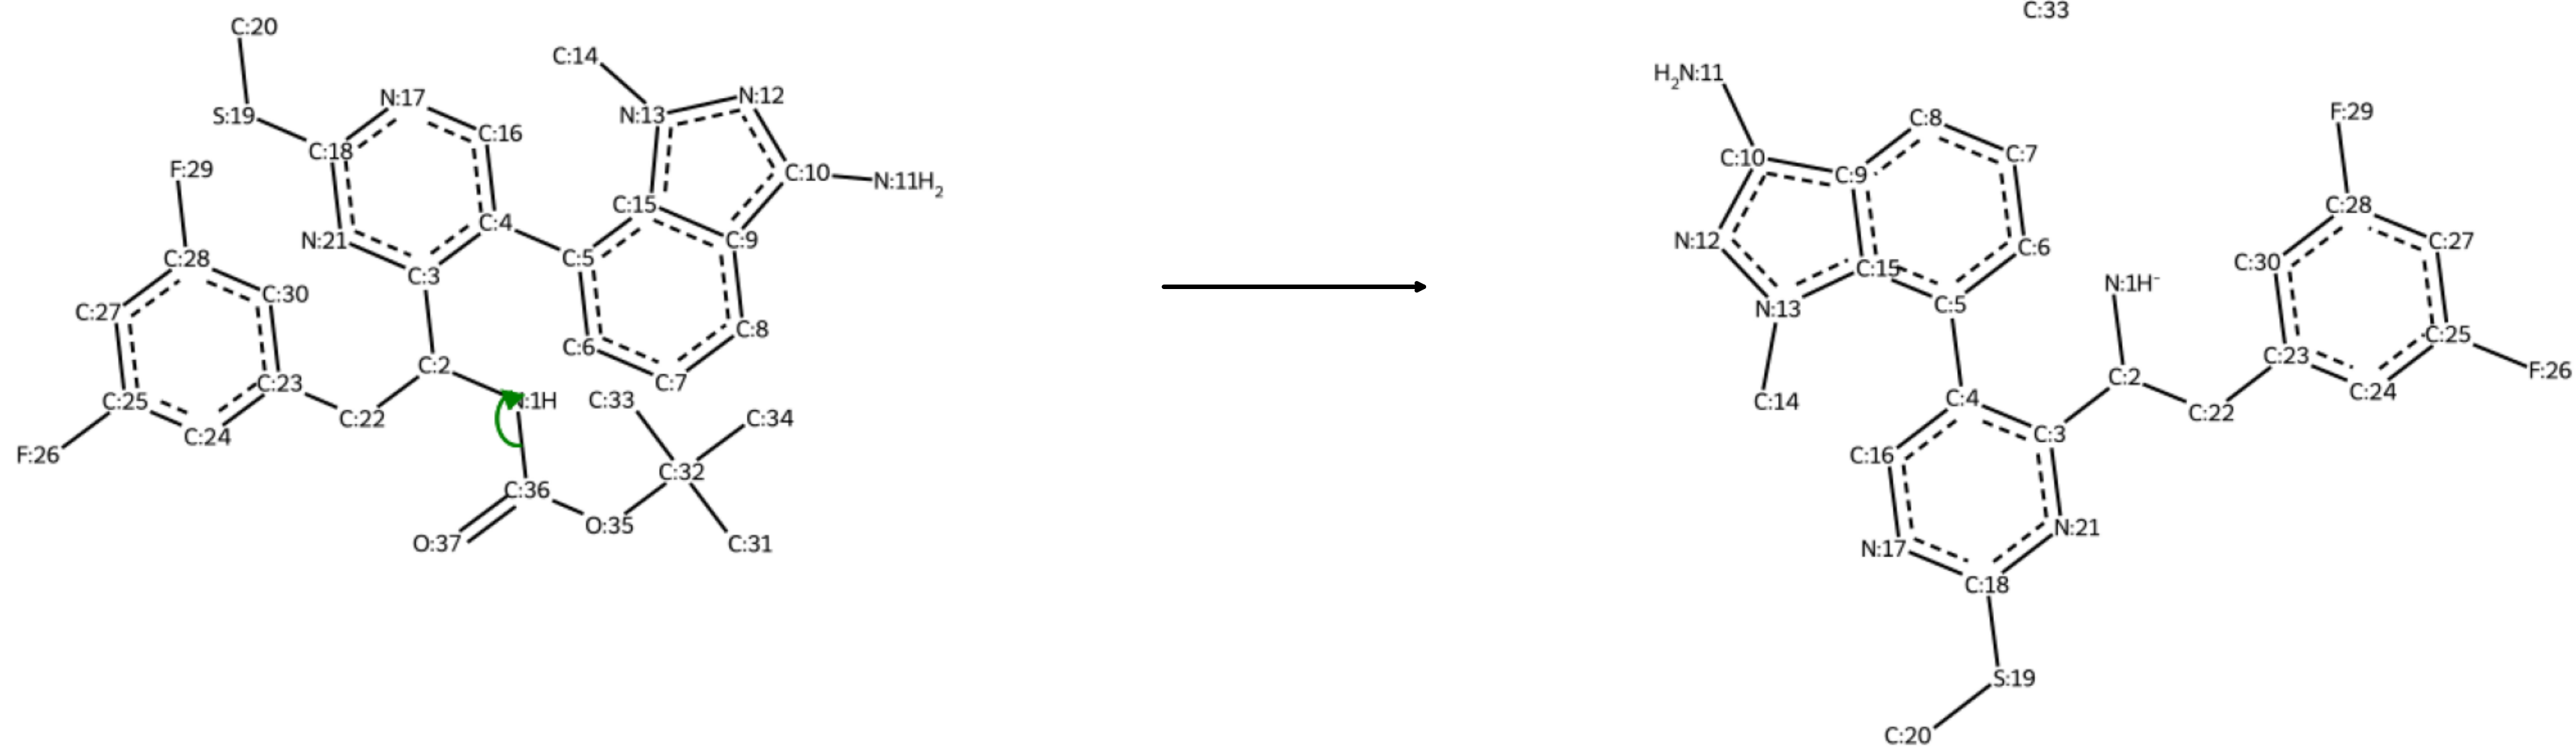

# Original reaction RXN\_ID:57

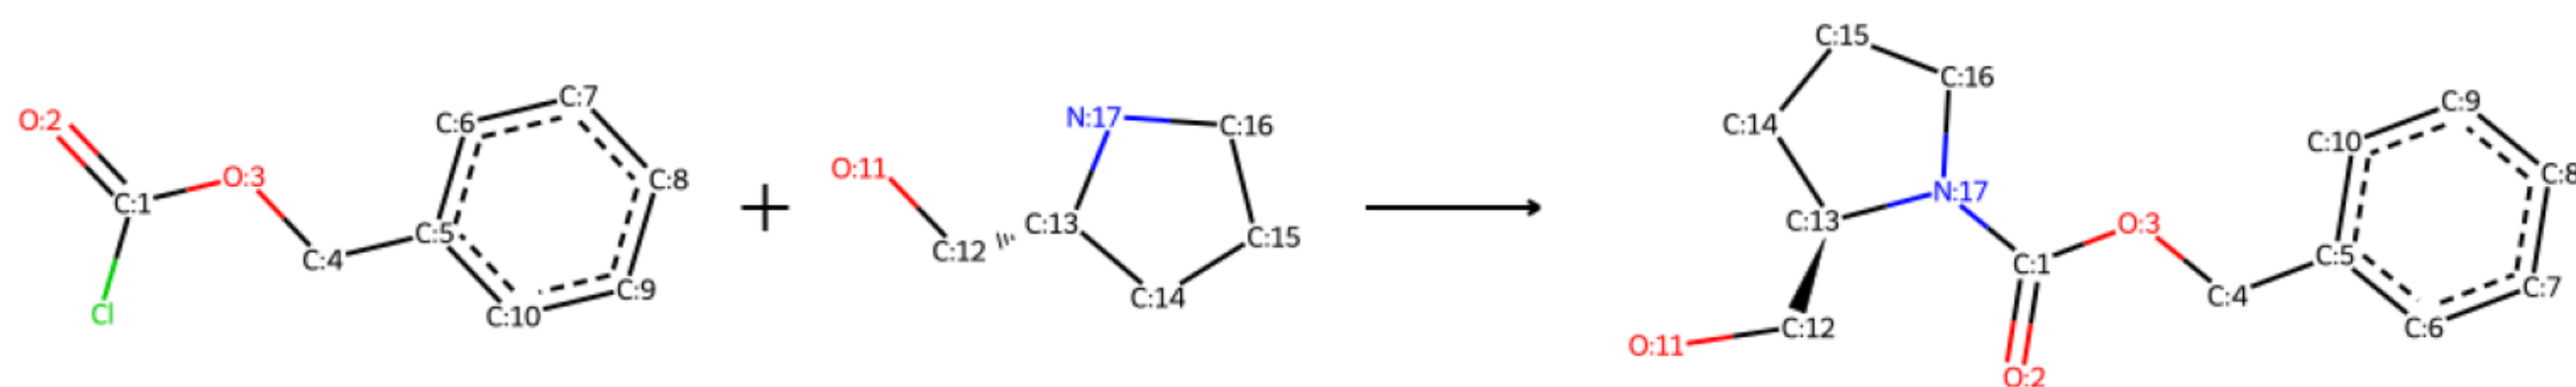

## ELECTRO-generated mechanistic pathway

[Arrow order: (1) green, (2) blue, (3) red, (4) orange]

step #1

Product(s)

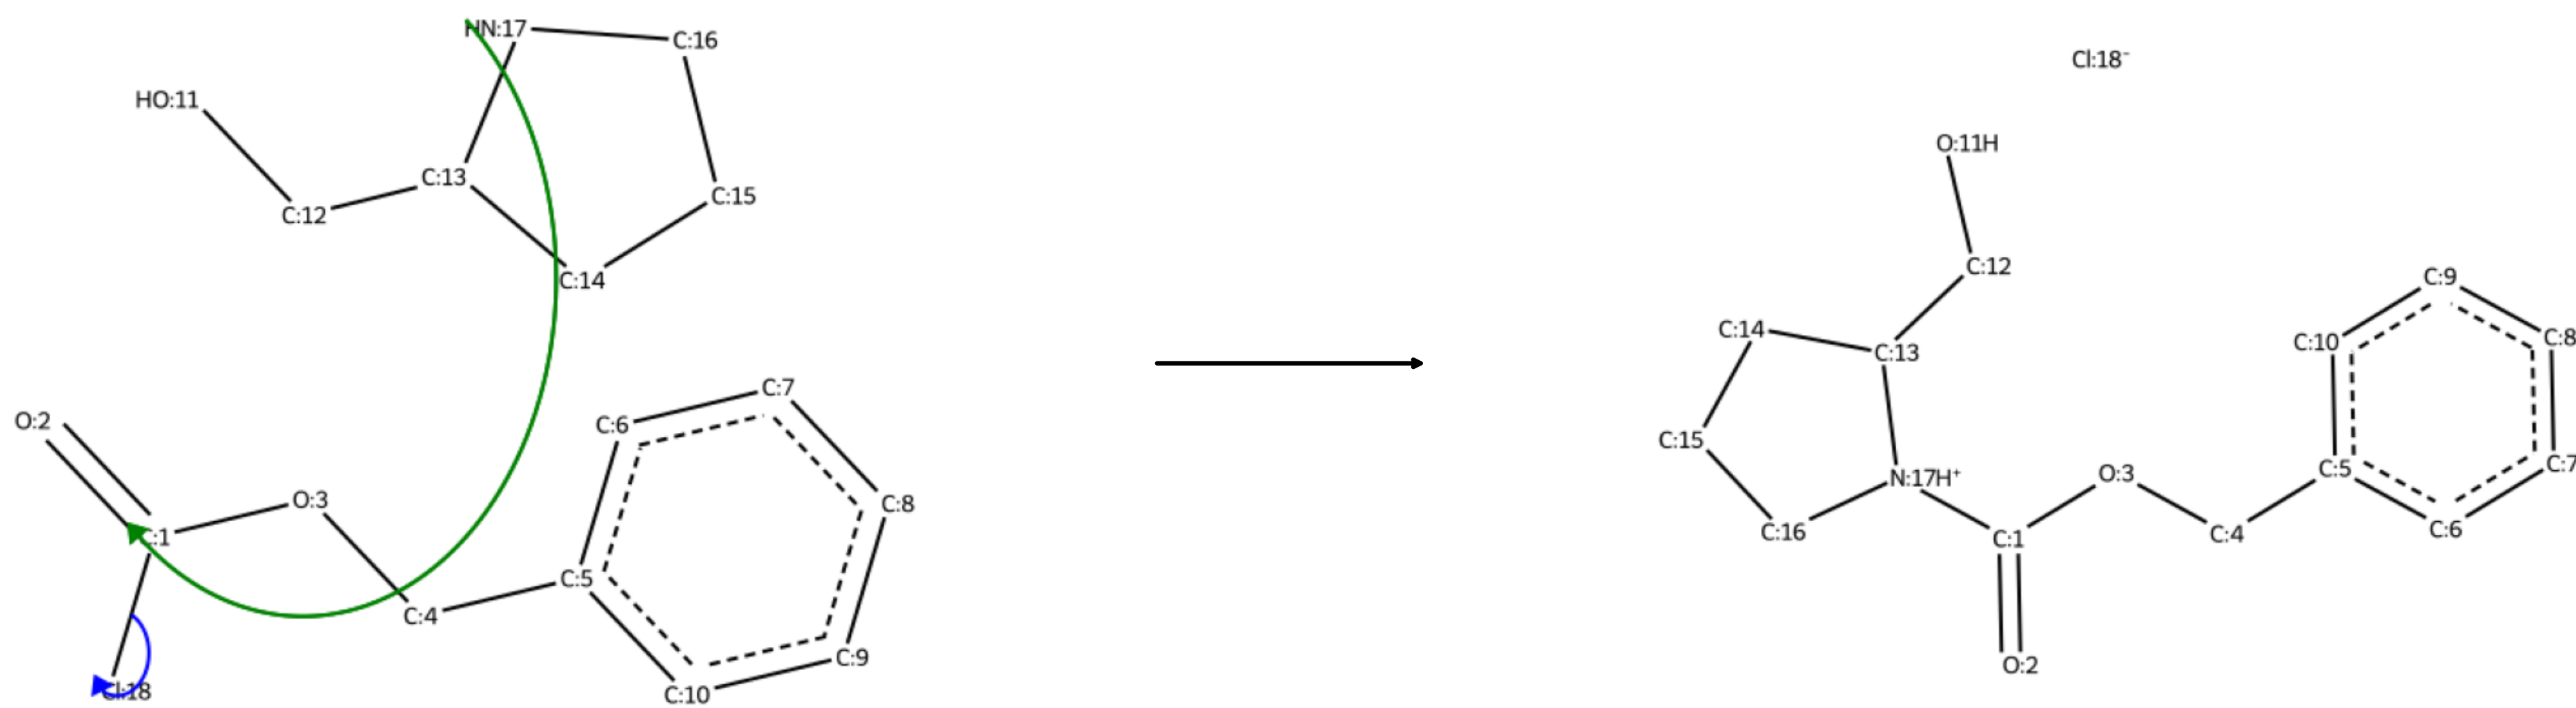



# Original reaction RXN\_ID:58

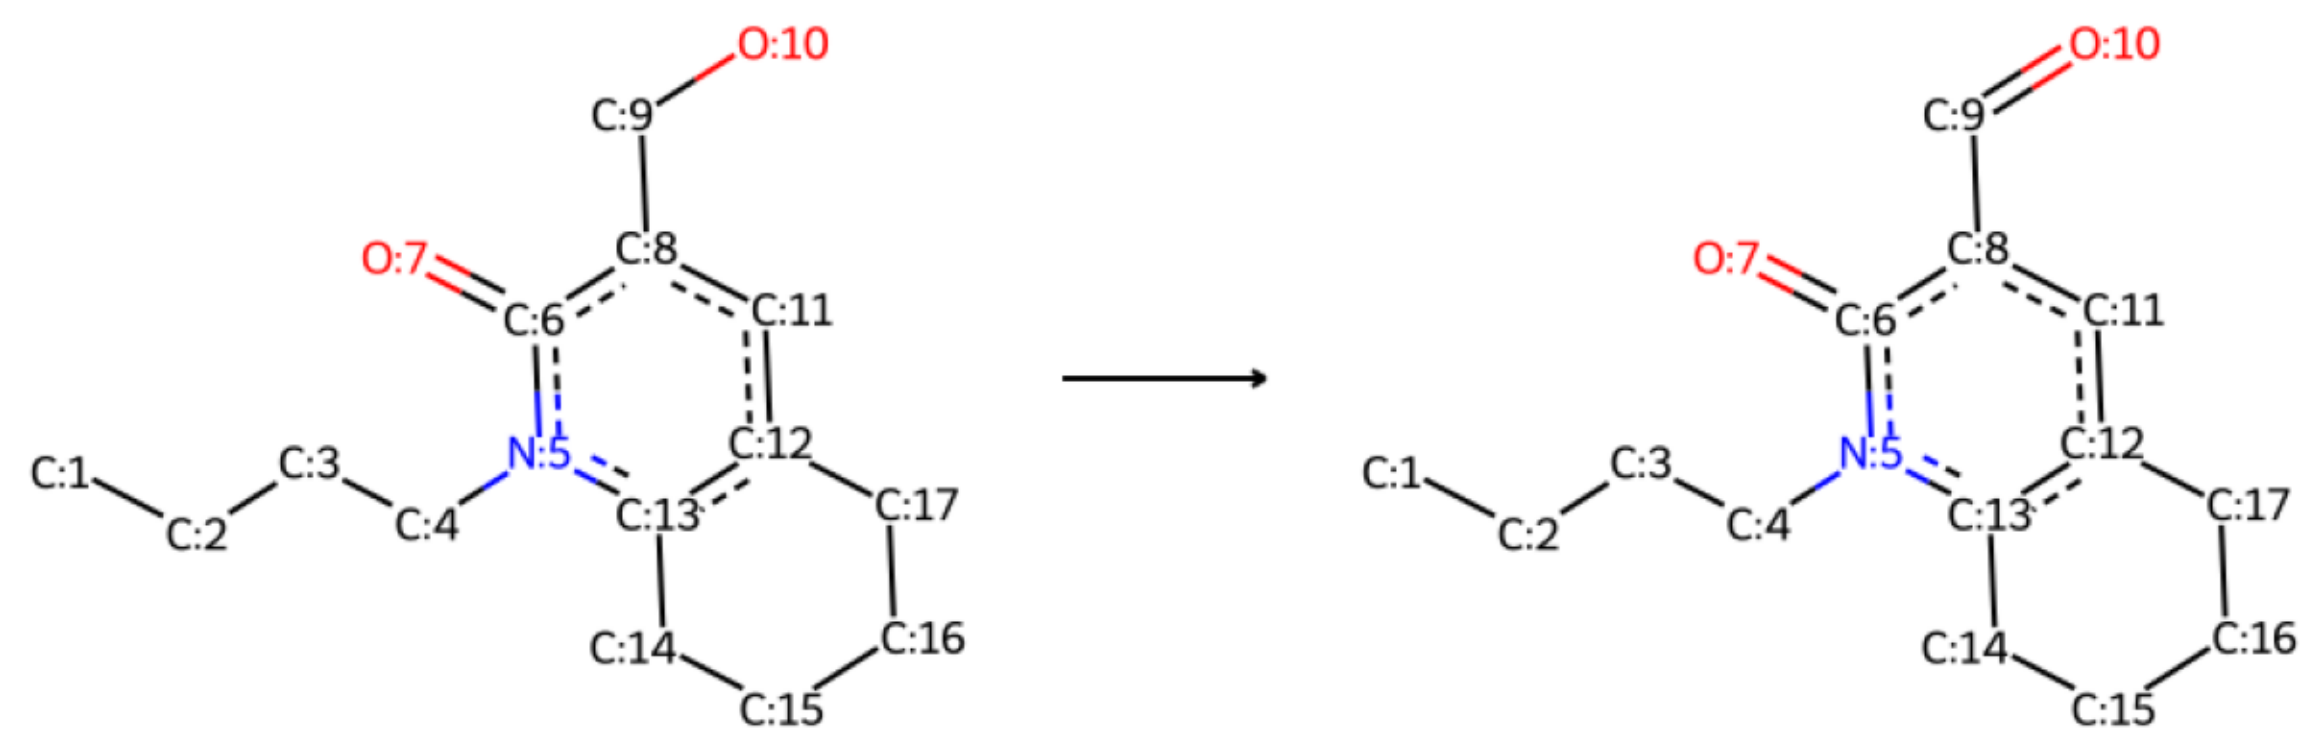

## ELECTRO-generated mechanistic pathway

[Arrow order: (1) green, (2) blue, (3) red, (4) orange]

step #1

Product(s)

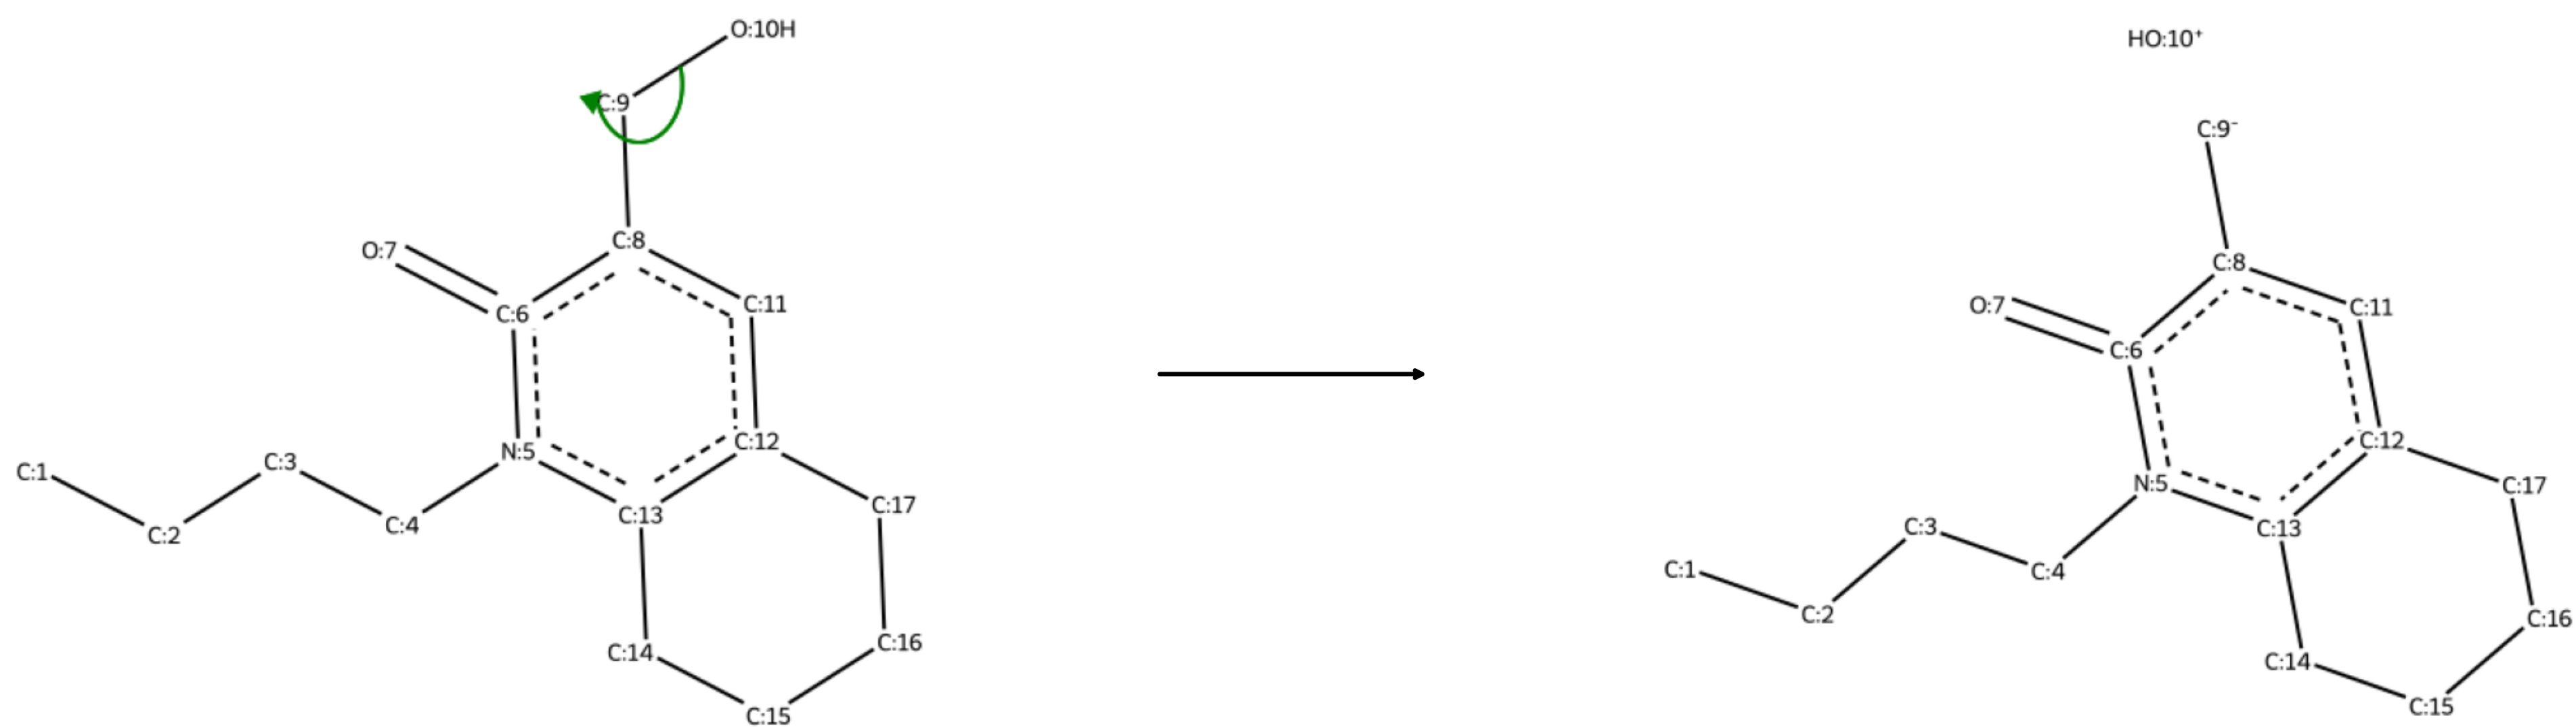

# Original reaction RXN\_ID:59

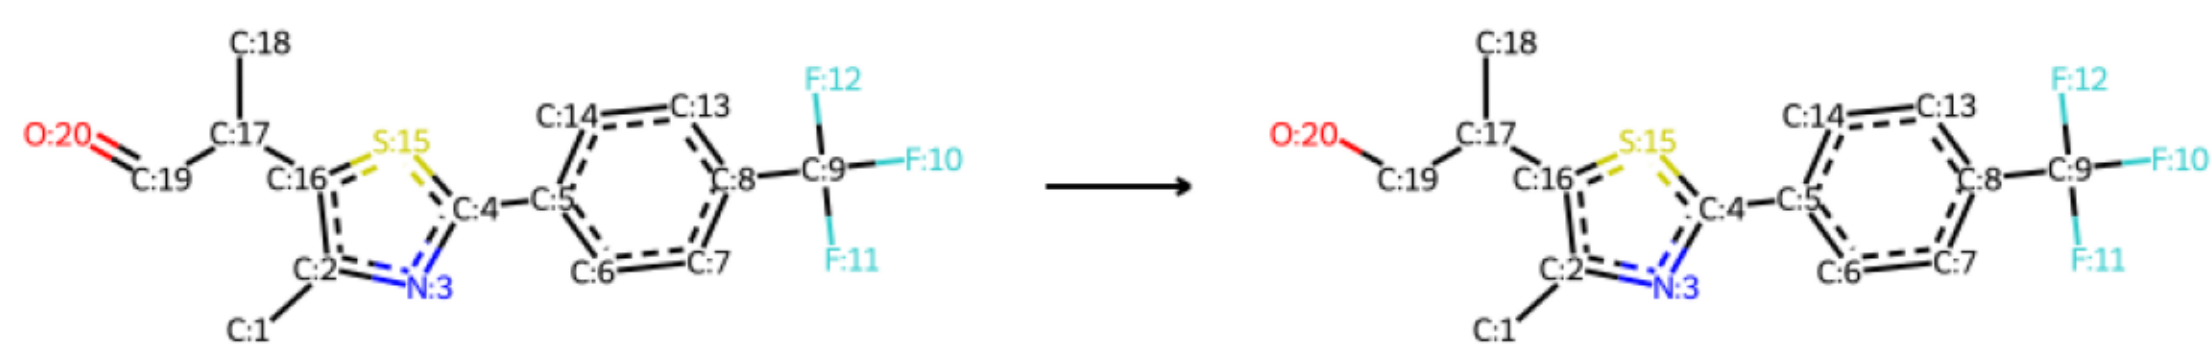

## ELECTRO-generated mechanistic pathway

[Arrow order: (1) green, (2) blue, (3) red, (4) orange]

step #1

Product(s)

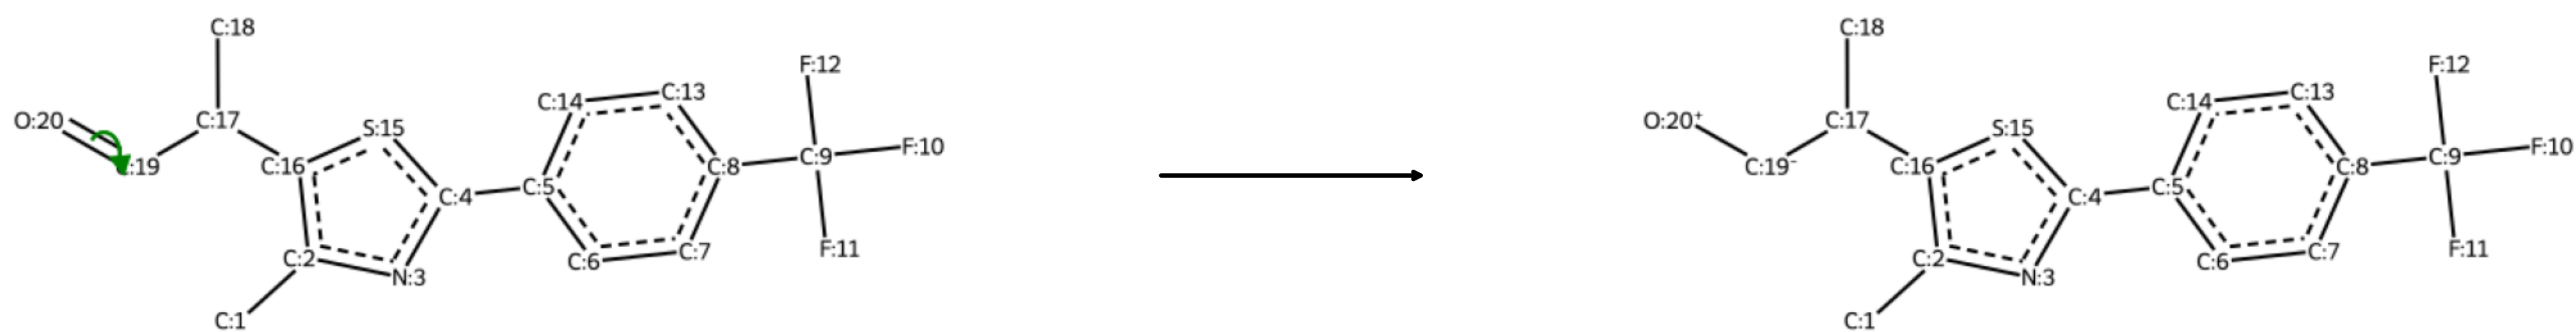



# Original reaction RXN\_ID:60

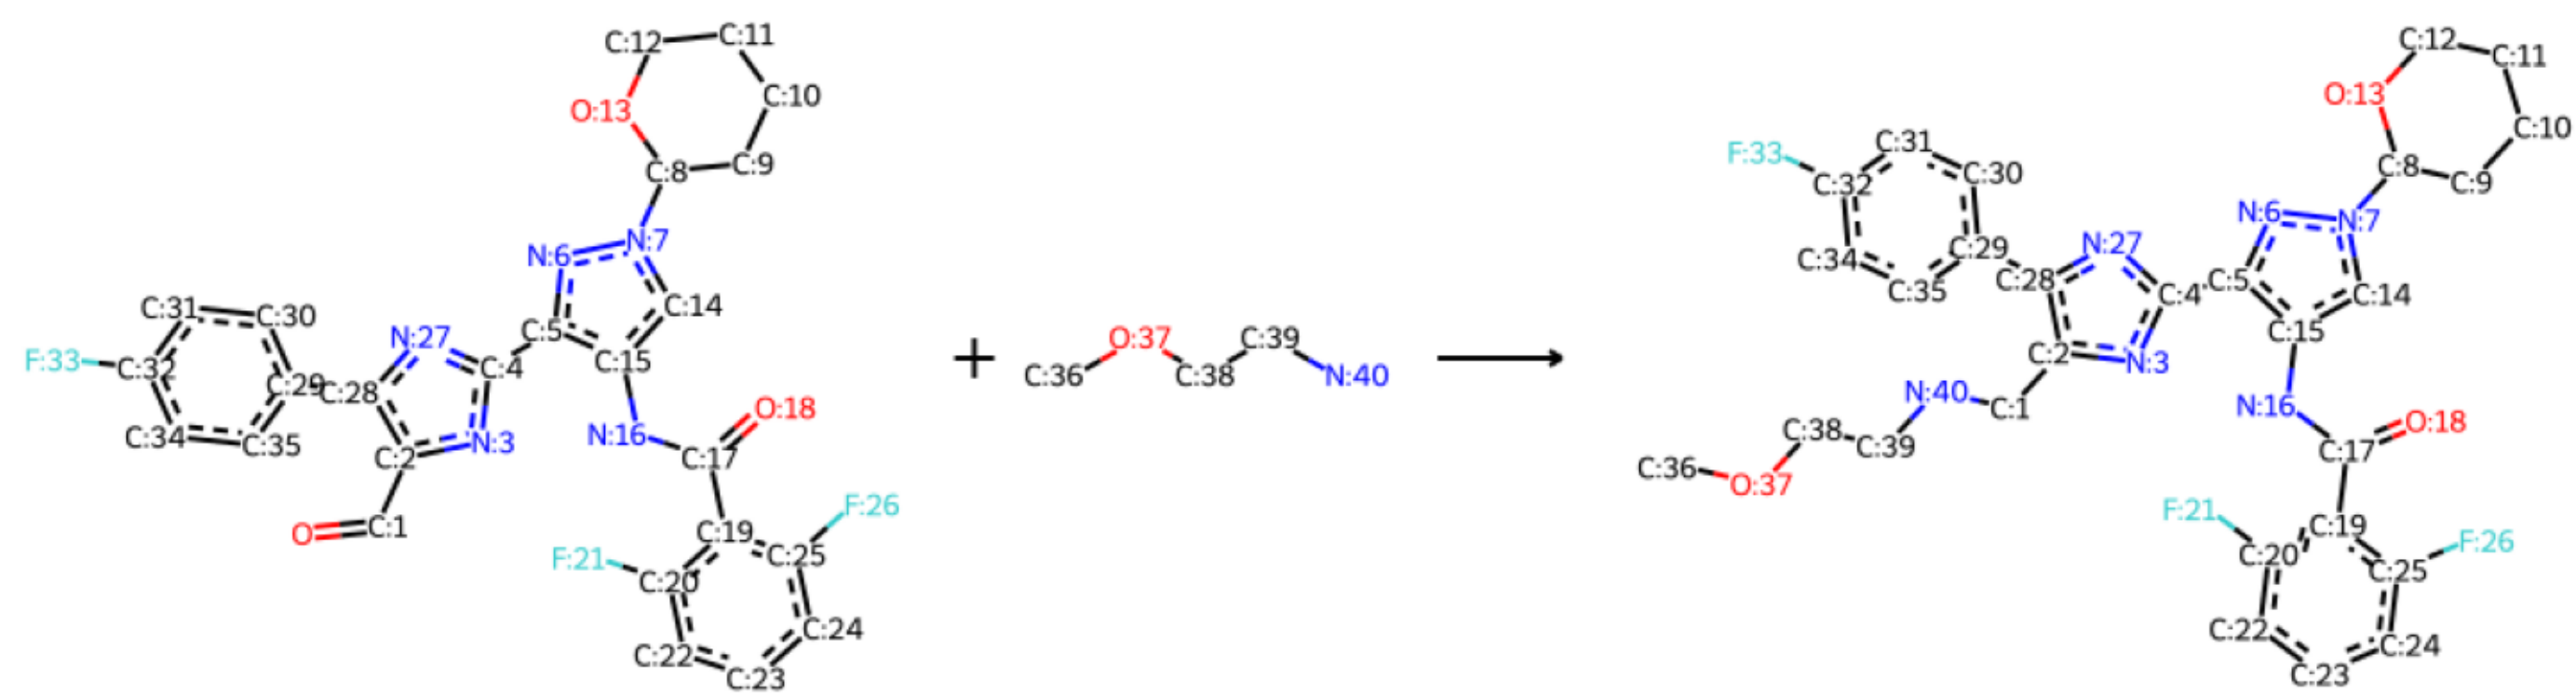

## ELECTRO-generated mechanistic pathway

[Arrow order: (1) green, (2) blue, (3) red, (4) orange]

step #1

Product(s)

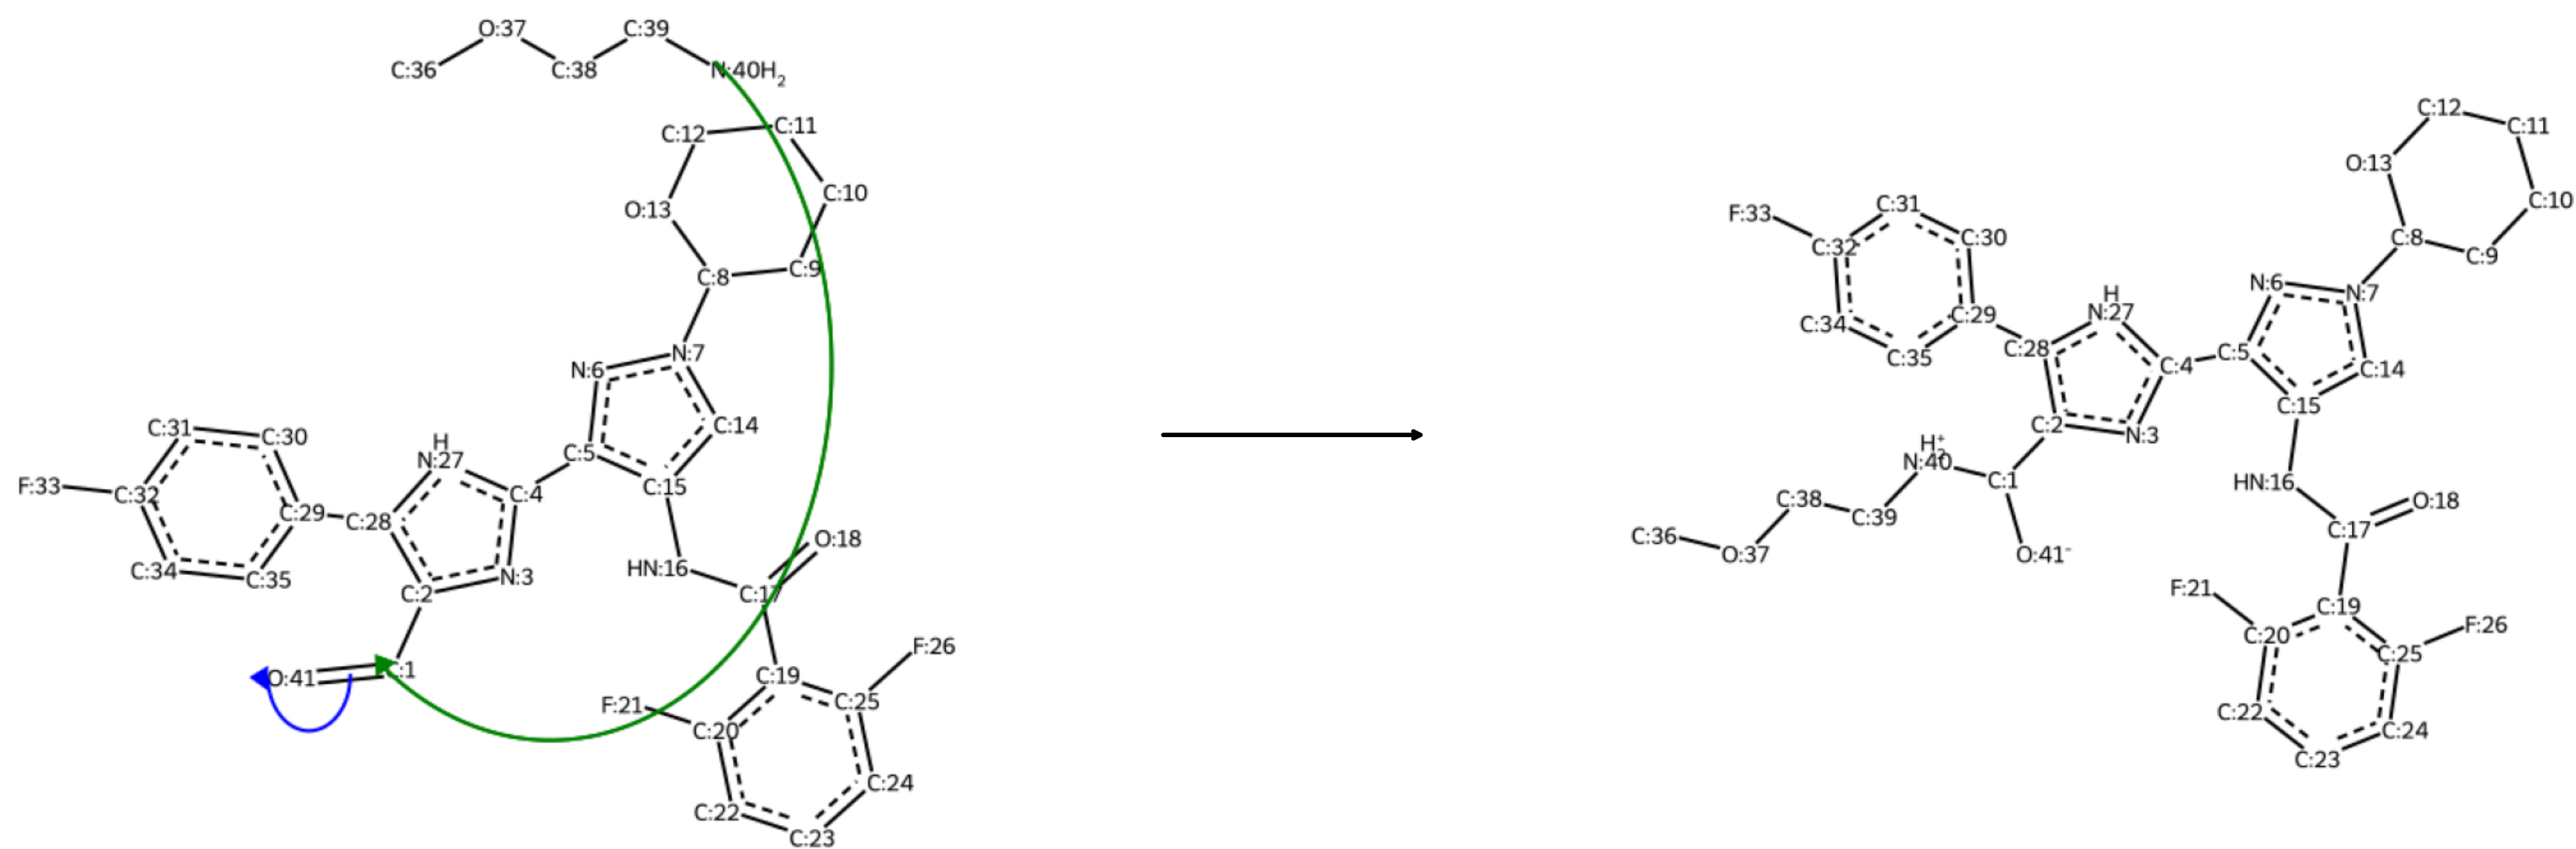

# Original reaction RXN\_ID:61

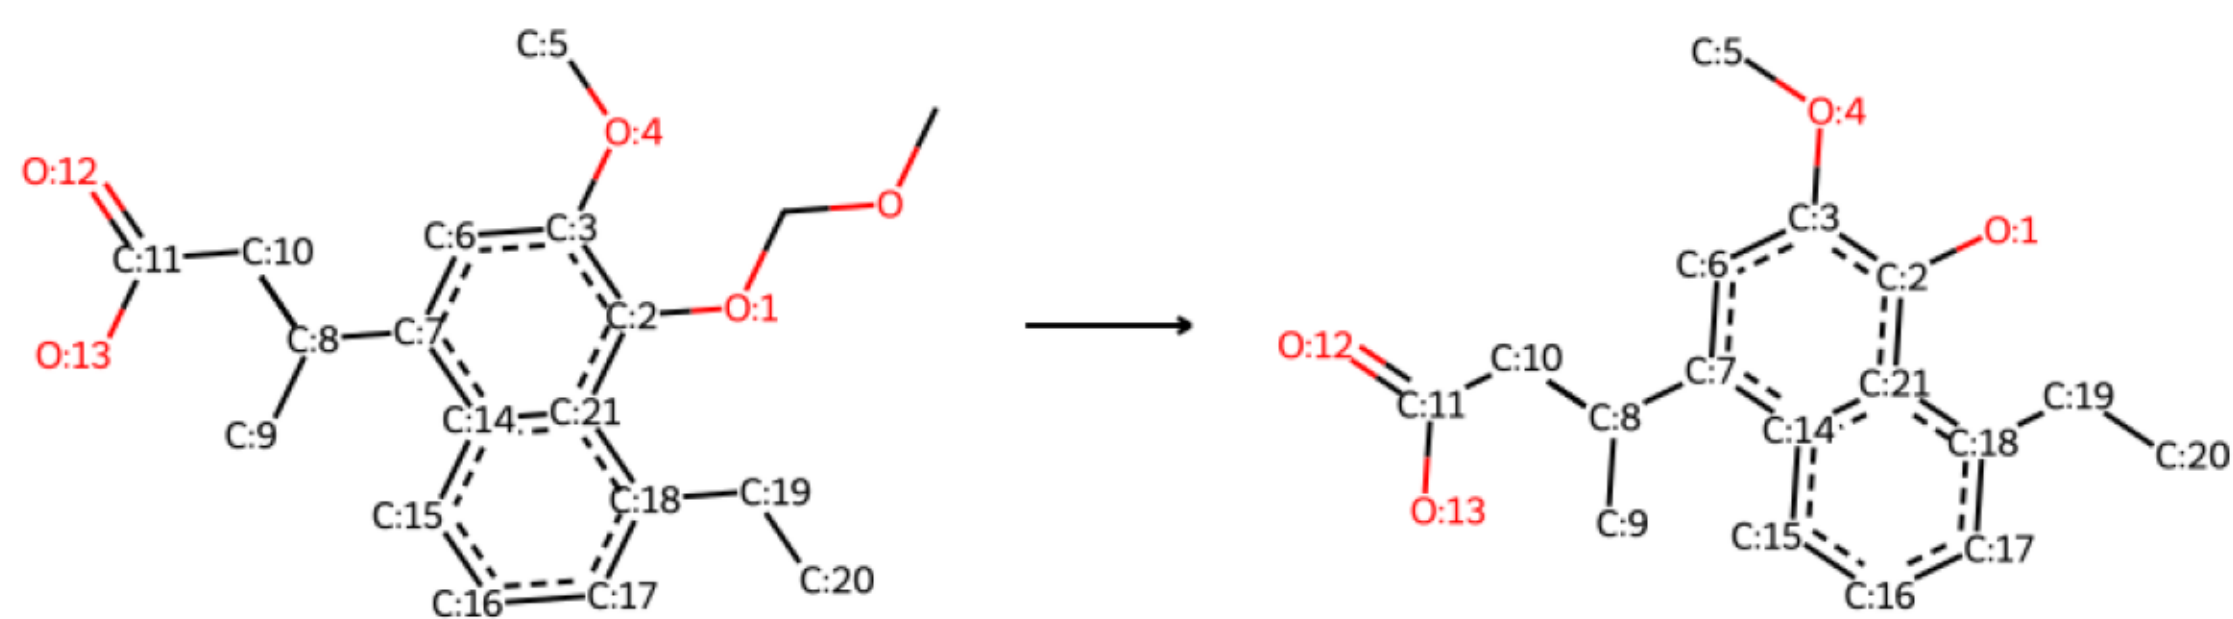

## ELECTRO-generated mechanistic pathway

[Arrow order: (1) green, (2) blue, (3) red, (4) orange]

step #1

Product(s)

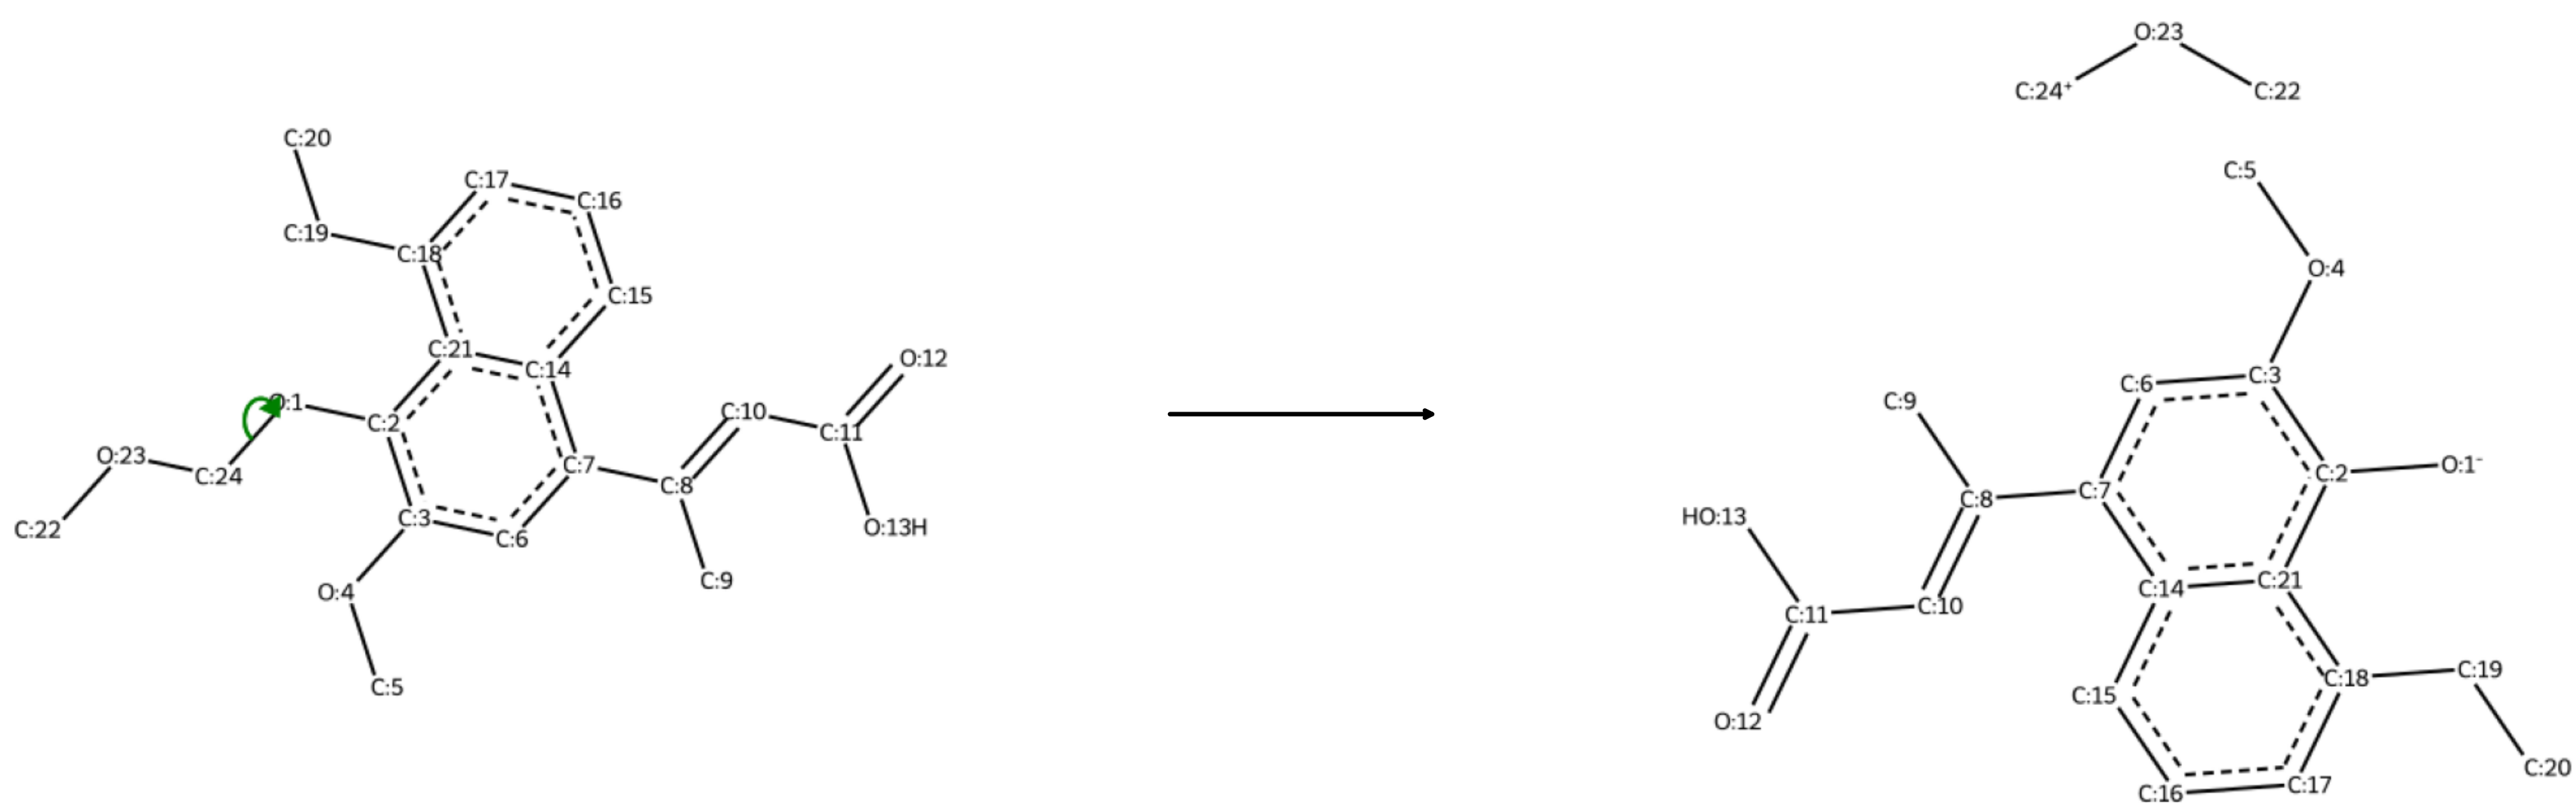



# Original reaction RXN\_ID:62

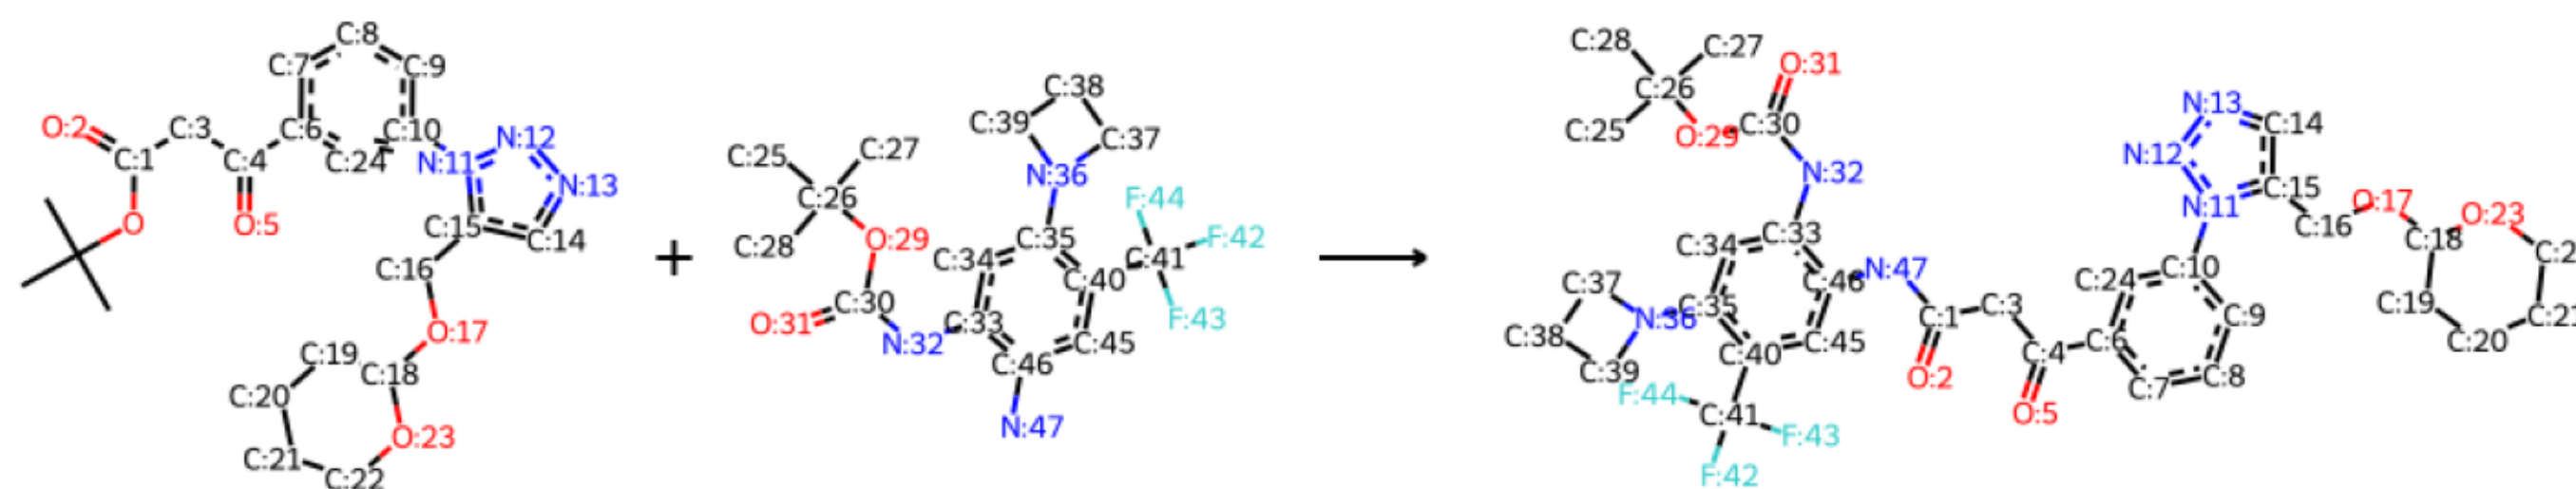

## ELECTRO-generated mechanistic pathway

[Arrow order: (1) green, (2) blue, (3) red, (4) orange]

step #1

Product(s)

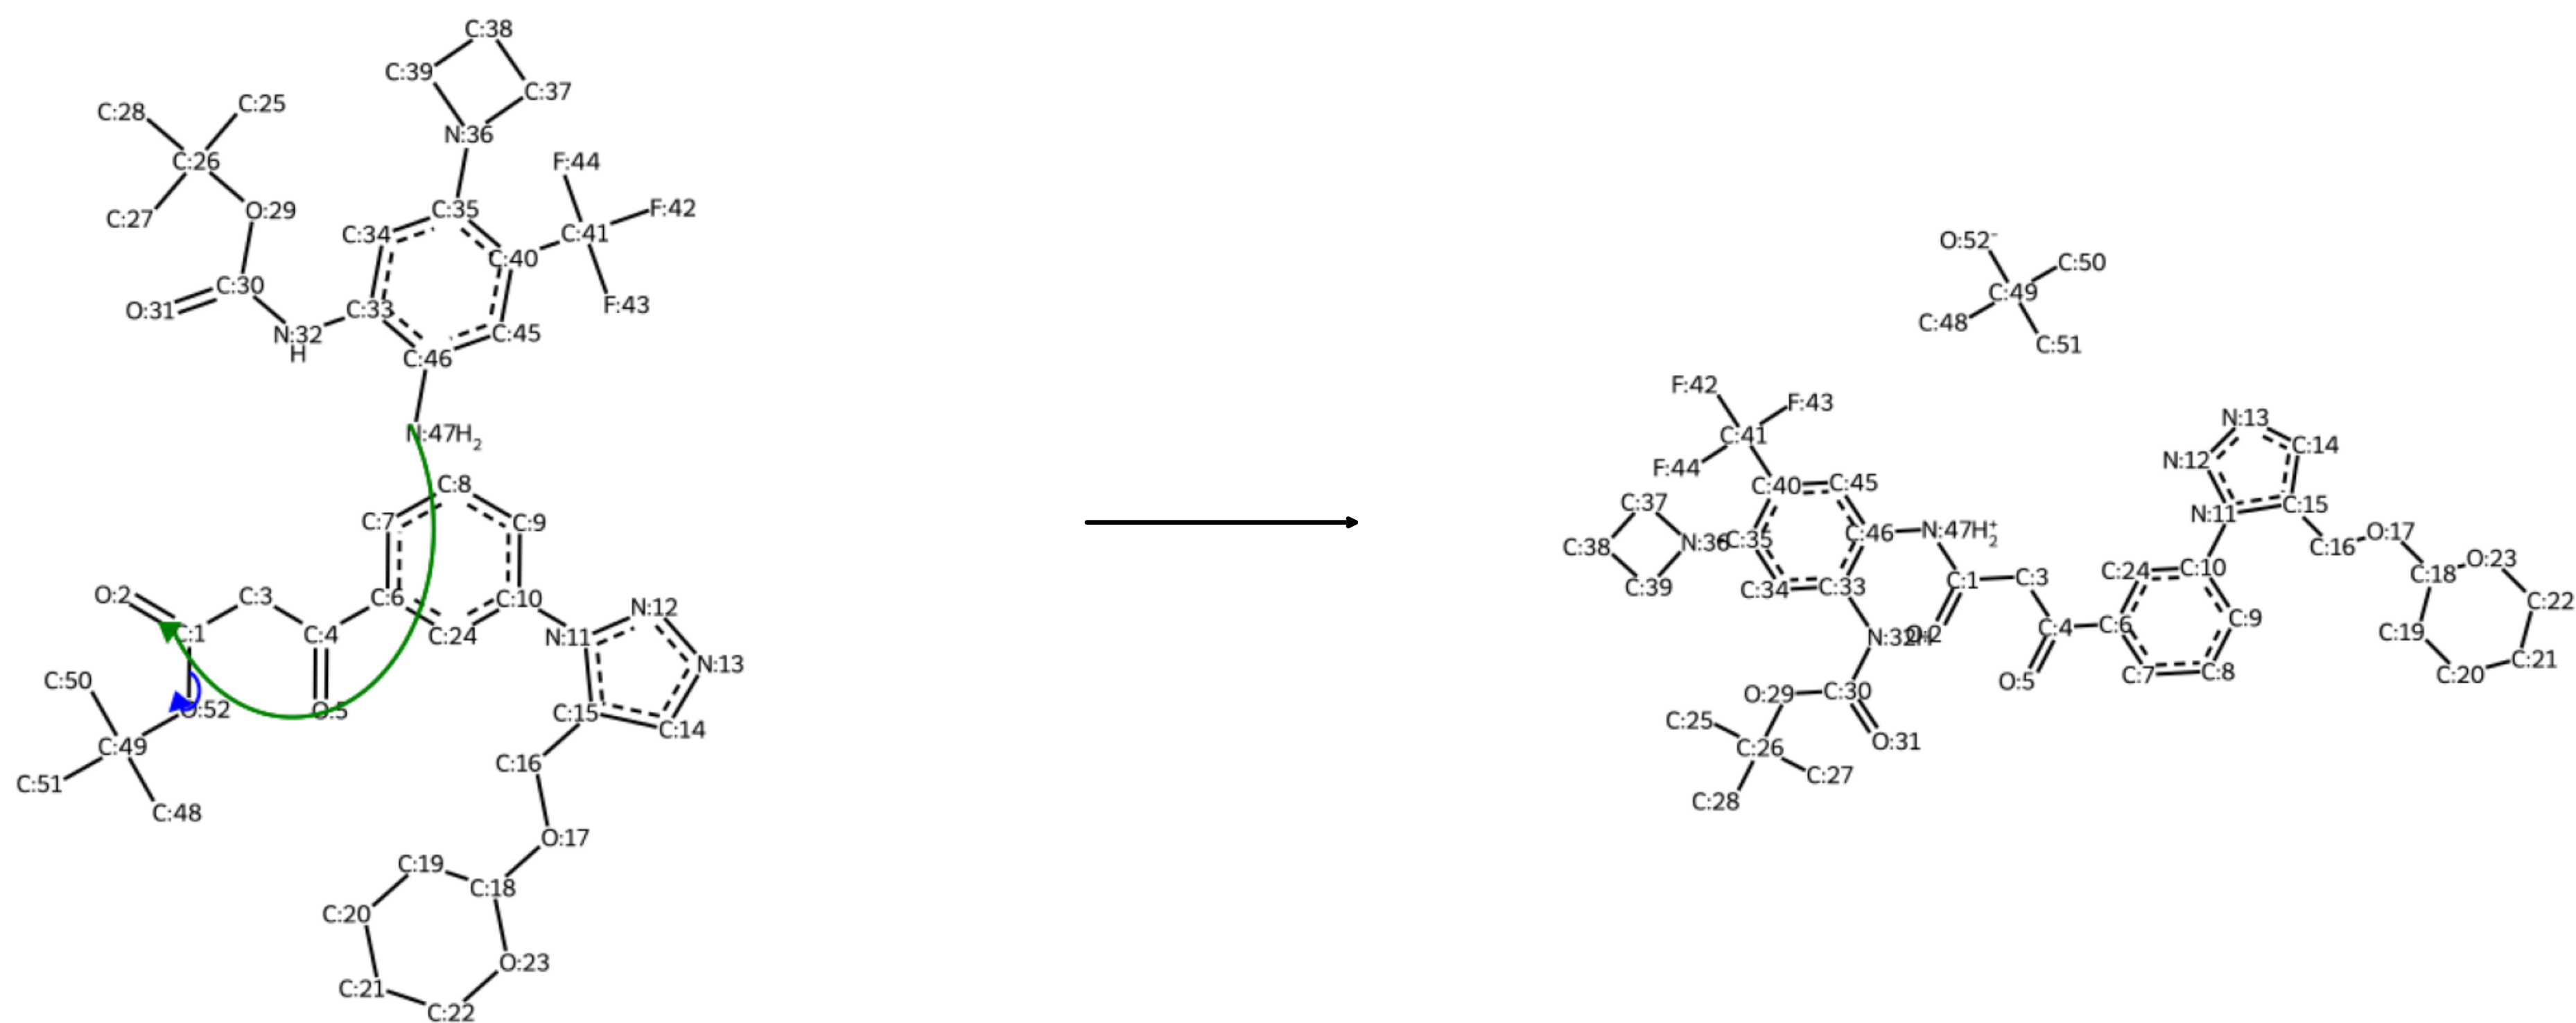

# Original reaction RXN\_ID:63

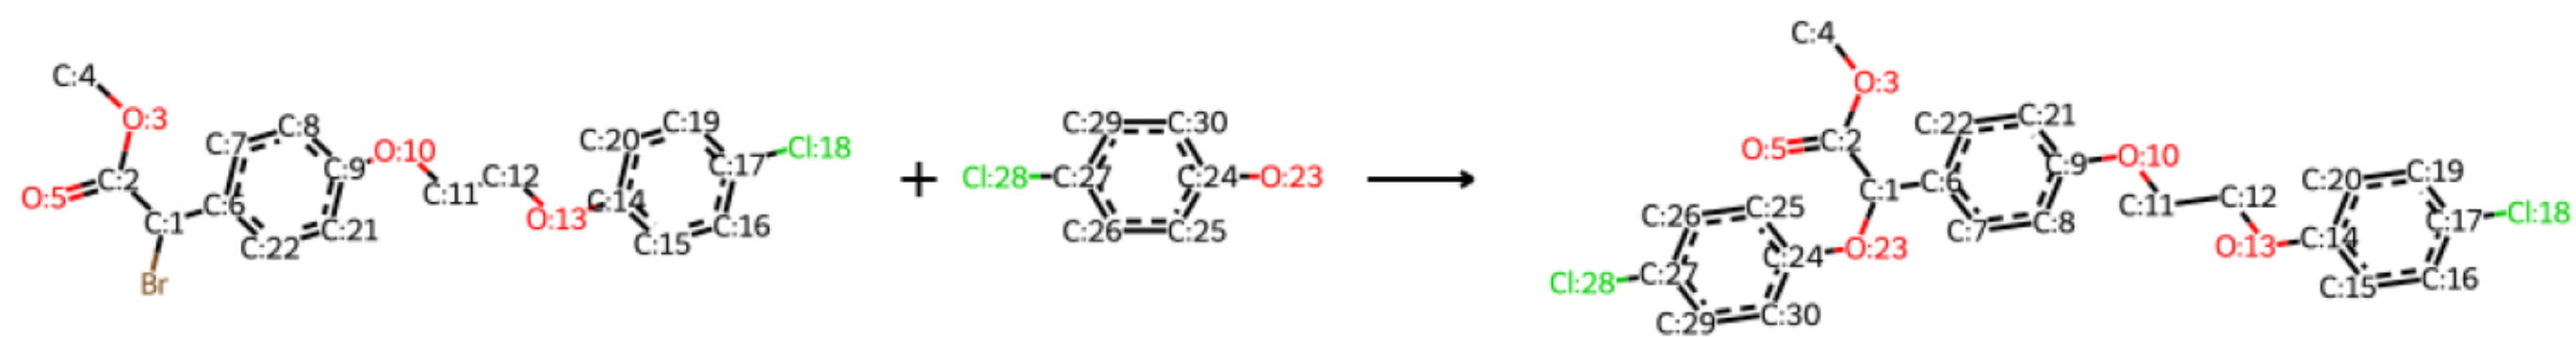

## ELECTRO-generated mechanistic pathway

[Arrow order: (1) green, (2) blue, (3) red, (4) orange]

step #1

Product(s)

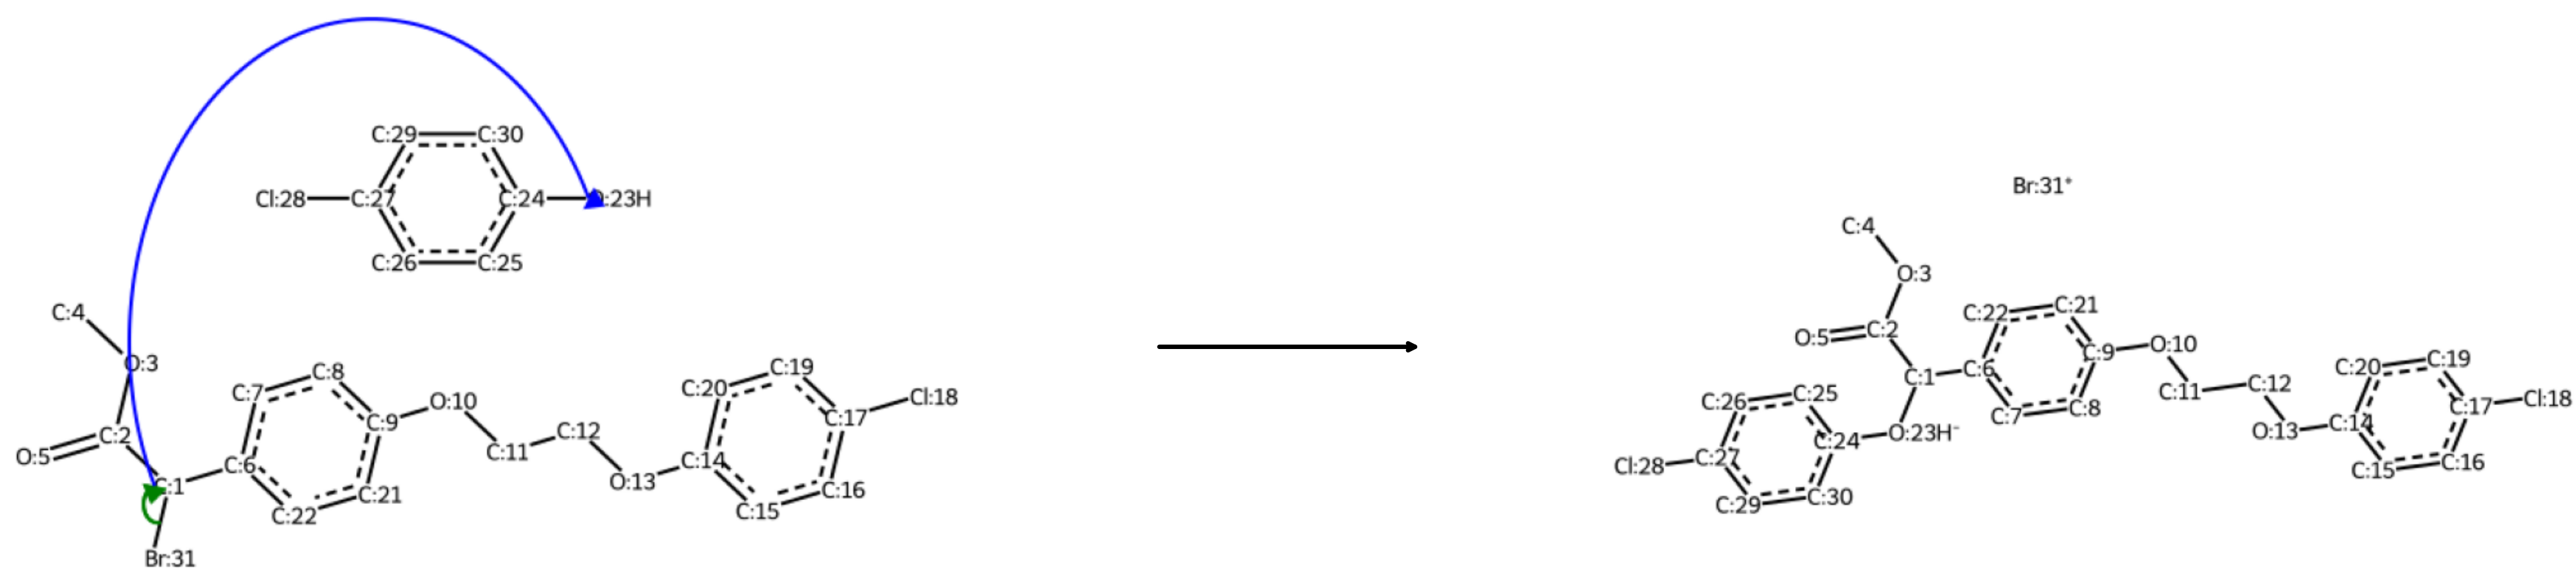



# Original reaction RXN\_ID:64

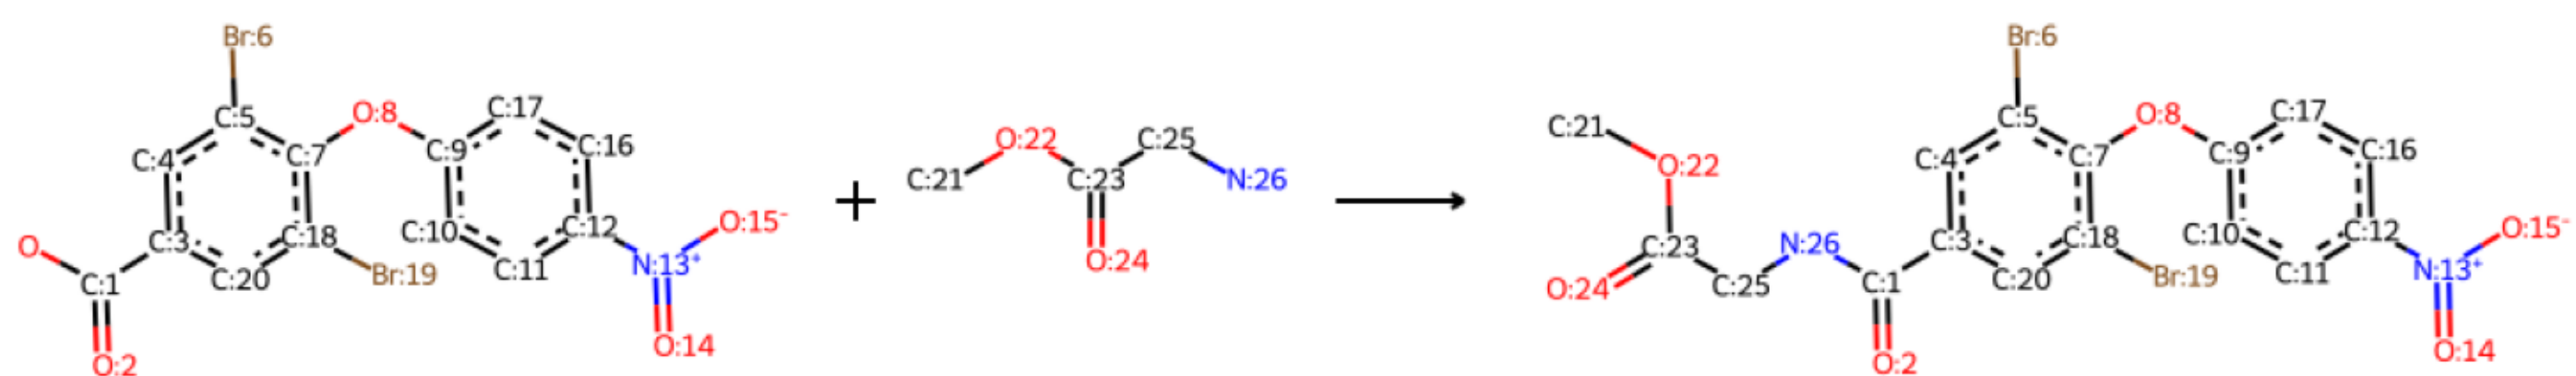

## ELECTRO-generated mechanistic pathway

[Arrow order: (1) green, (2) blue, (3) red, (4) orange]

step #1

Product(s)

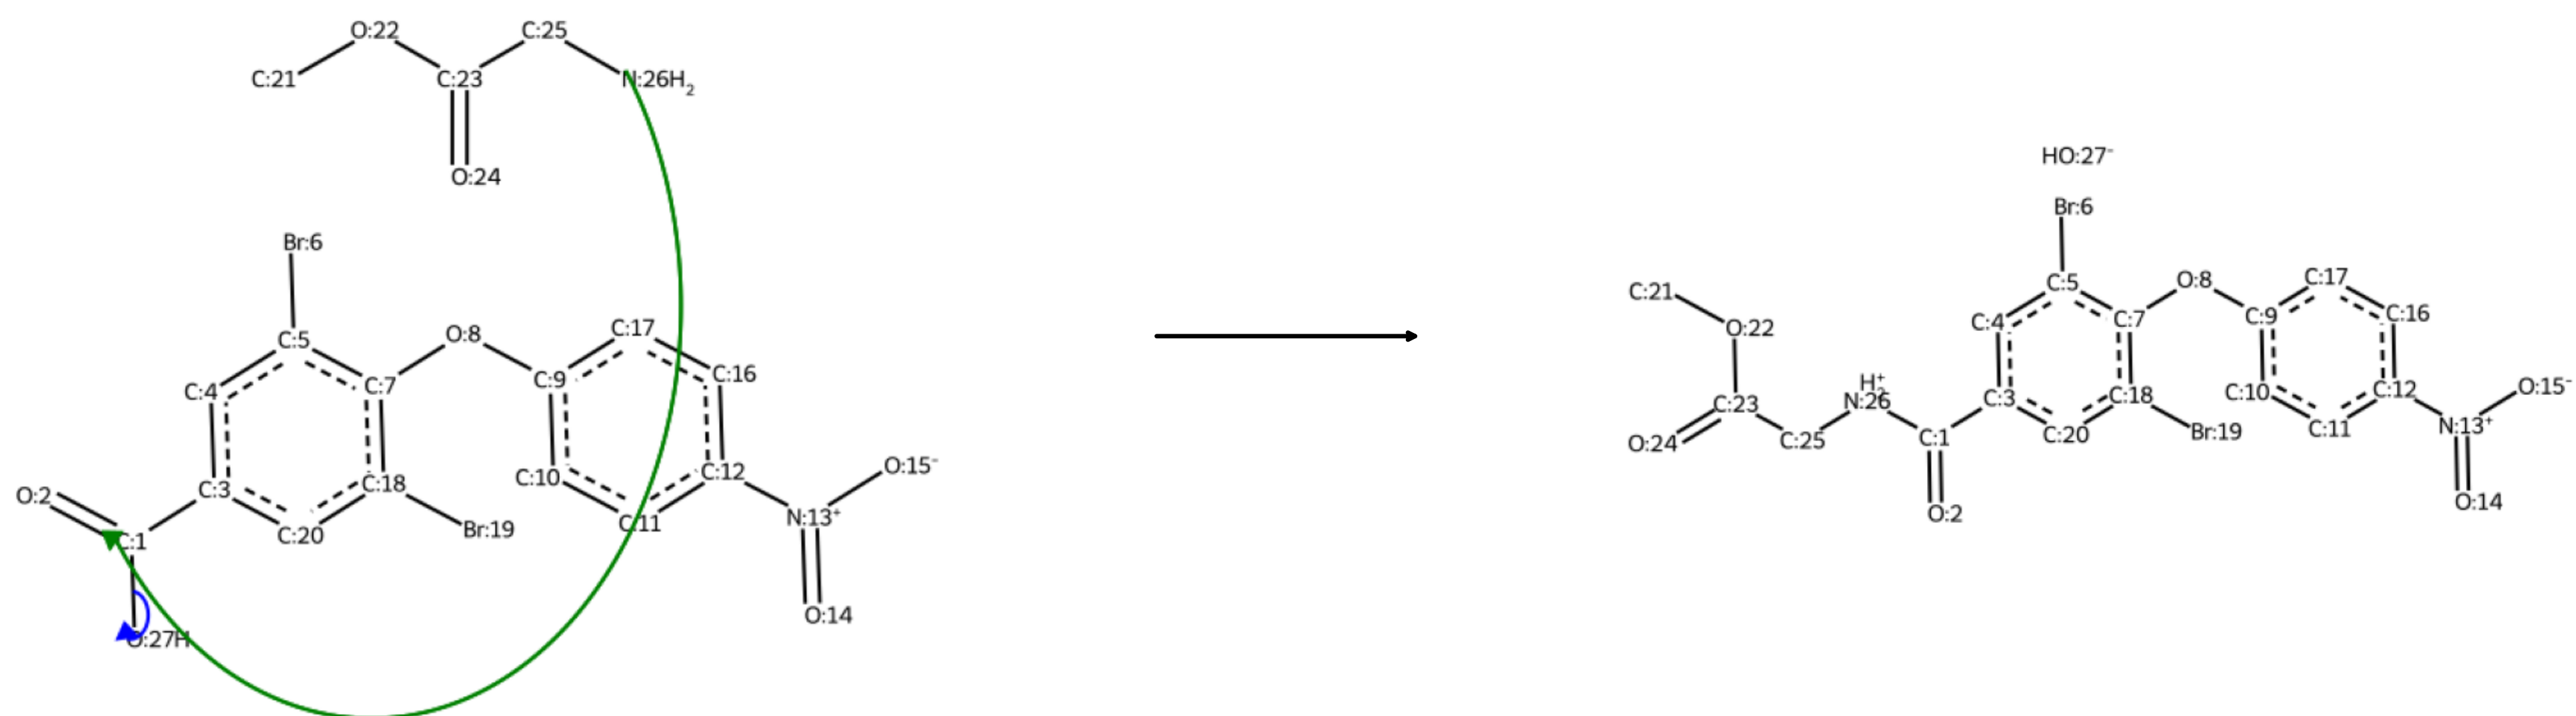

# Original reaction RXN\_ID:65

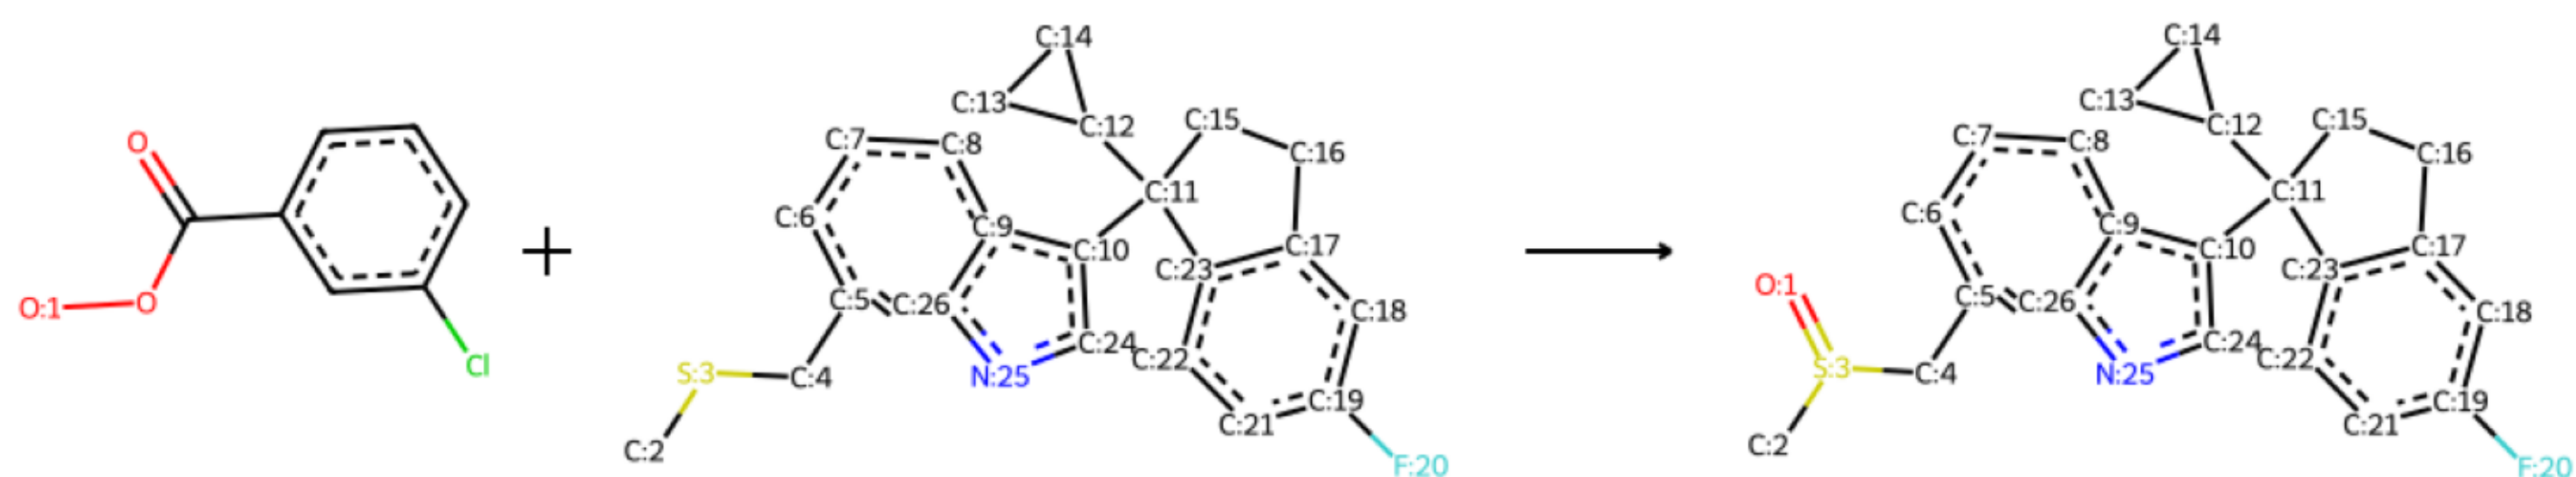

## ELECTRO-generated mechanistic pathway

[Arrow order: (1) green, (2) blue, (3) red, (4) orange]

step #1

Product(s)

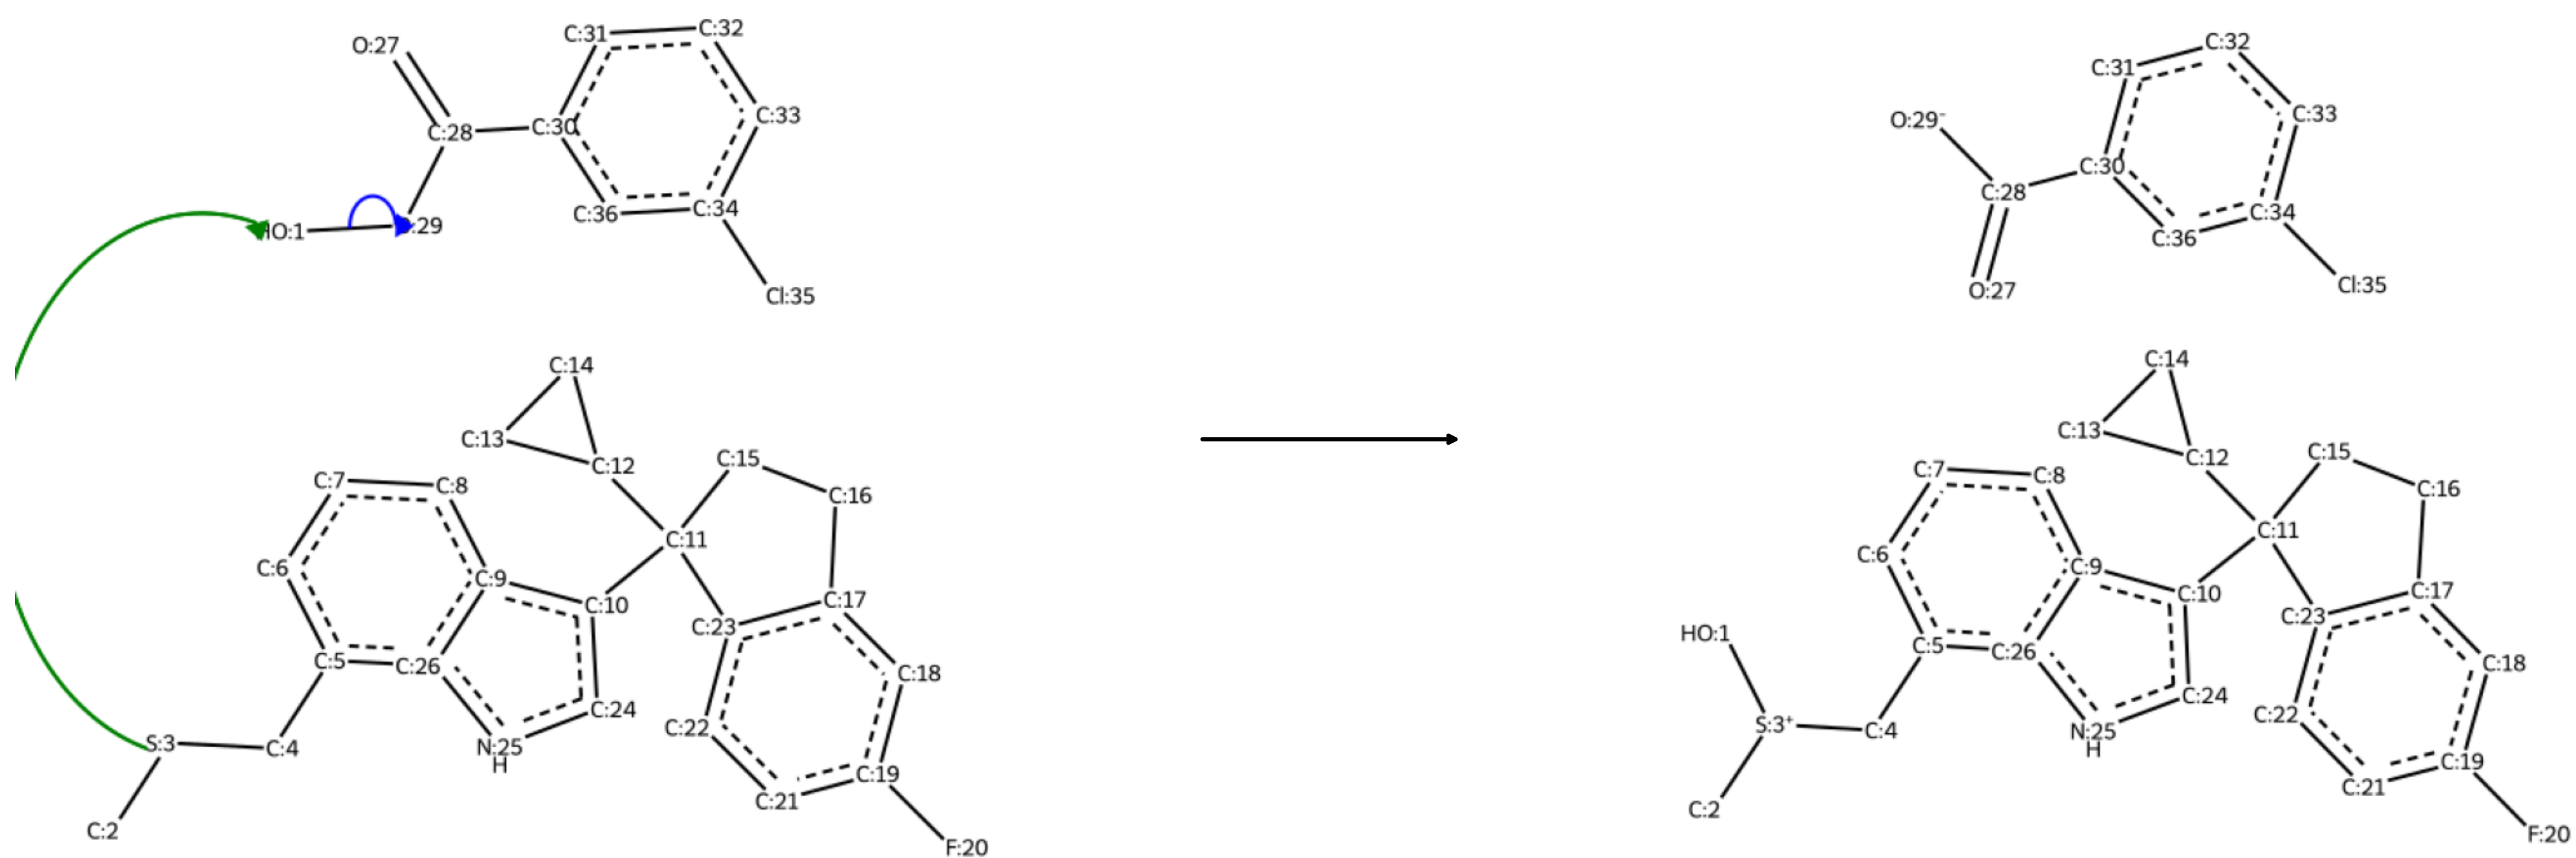



# Original reaction RXN\_ID:66

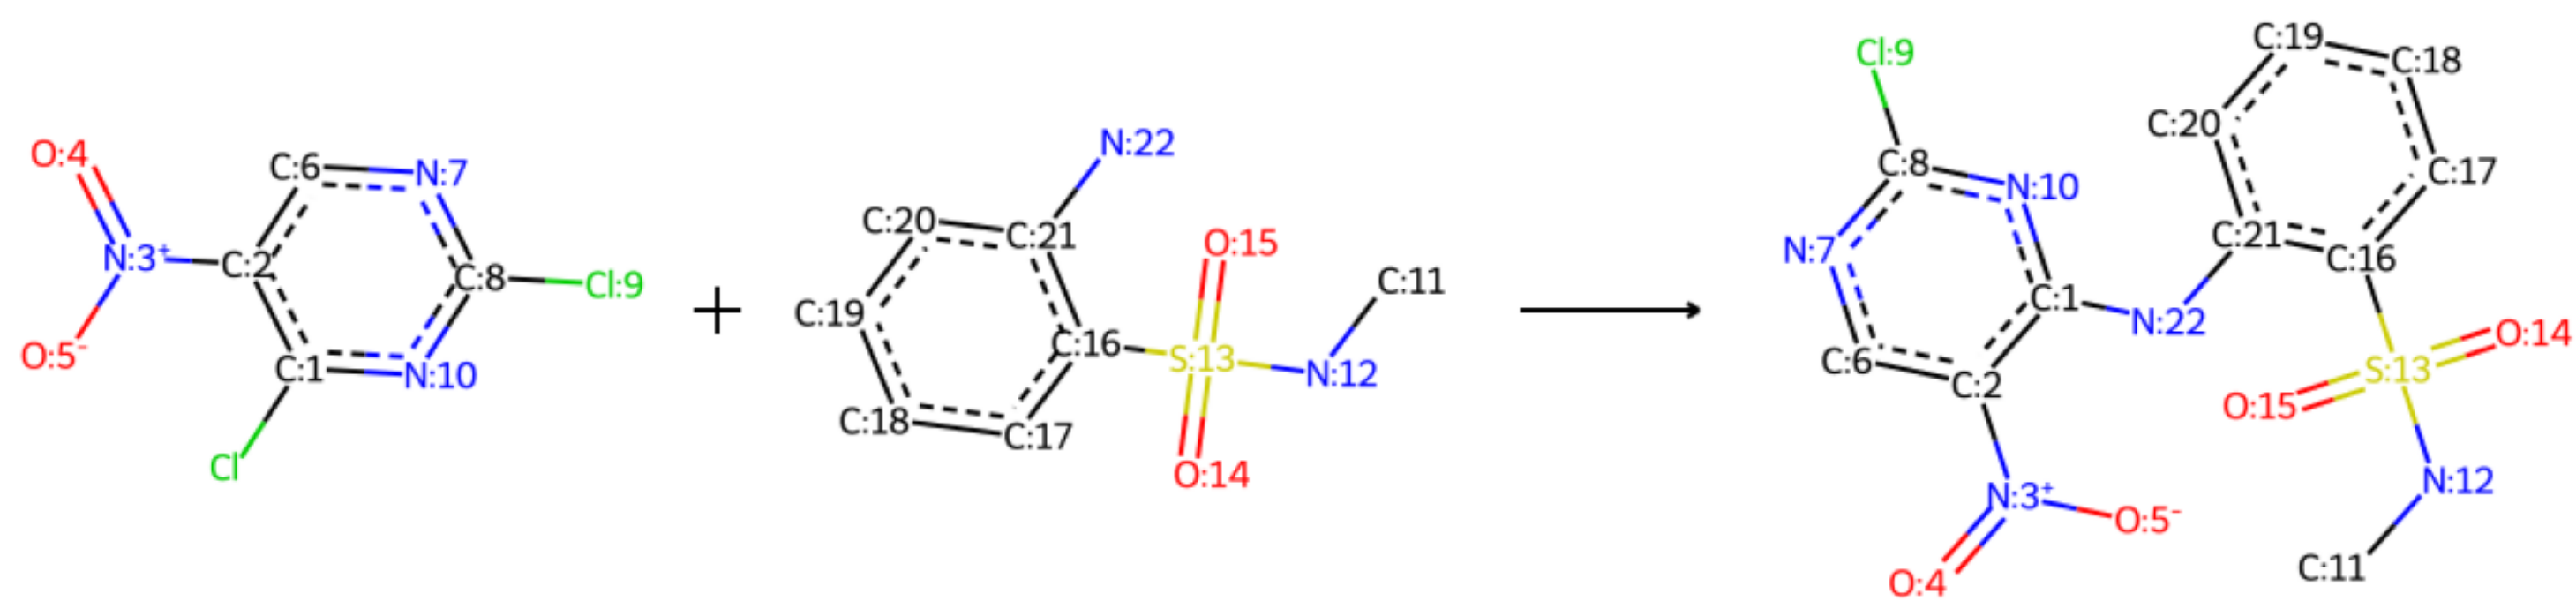

## ELECTRO-generated mechanistic pathway

[Arrow order: (1) green, (2) blue, (3) red, (4) orange]

step #1

Product(s)

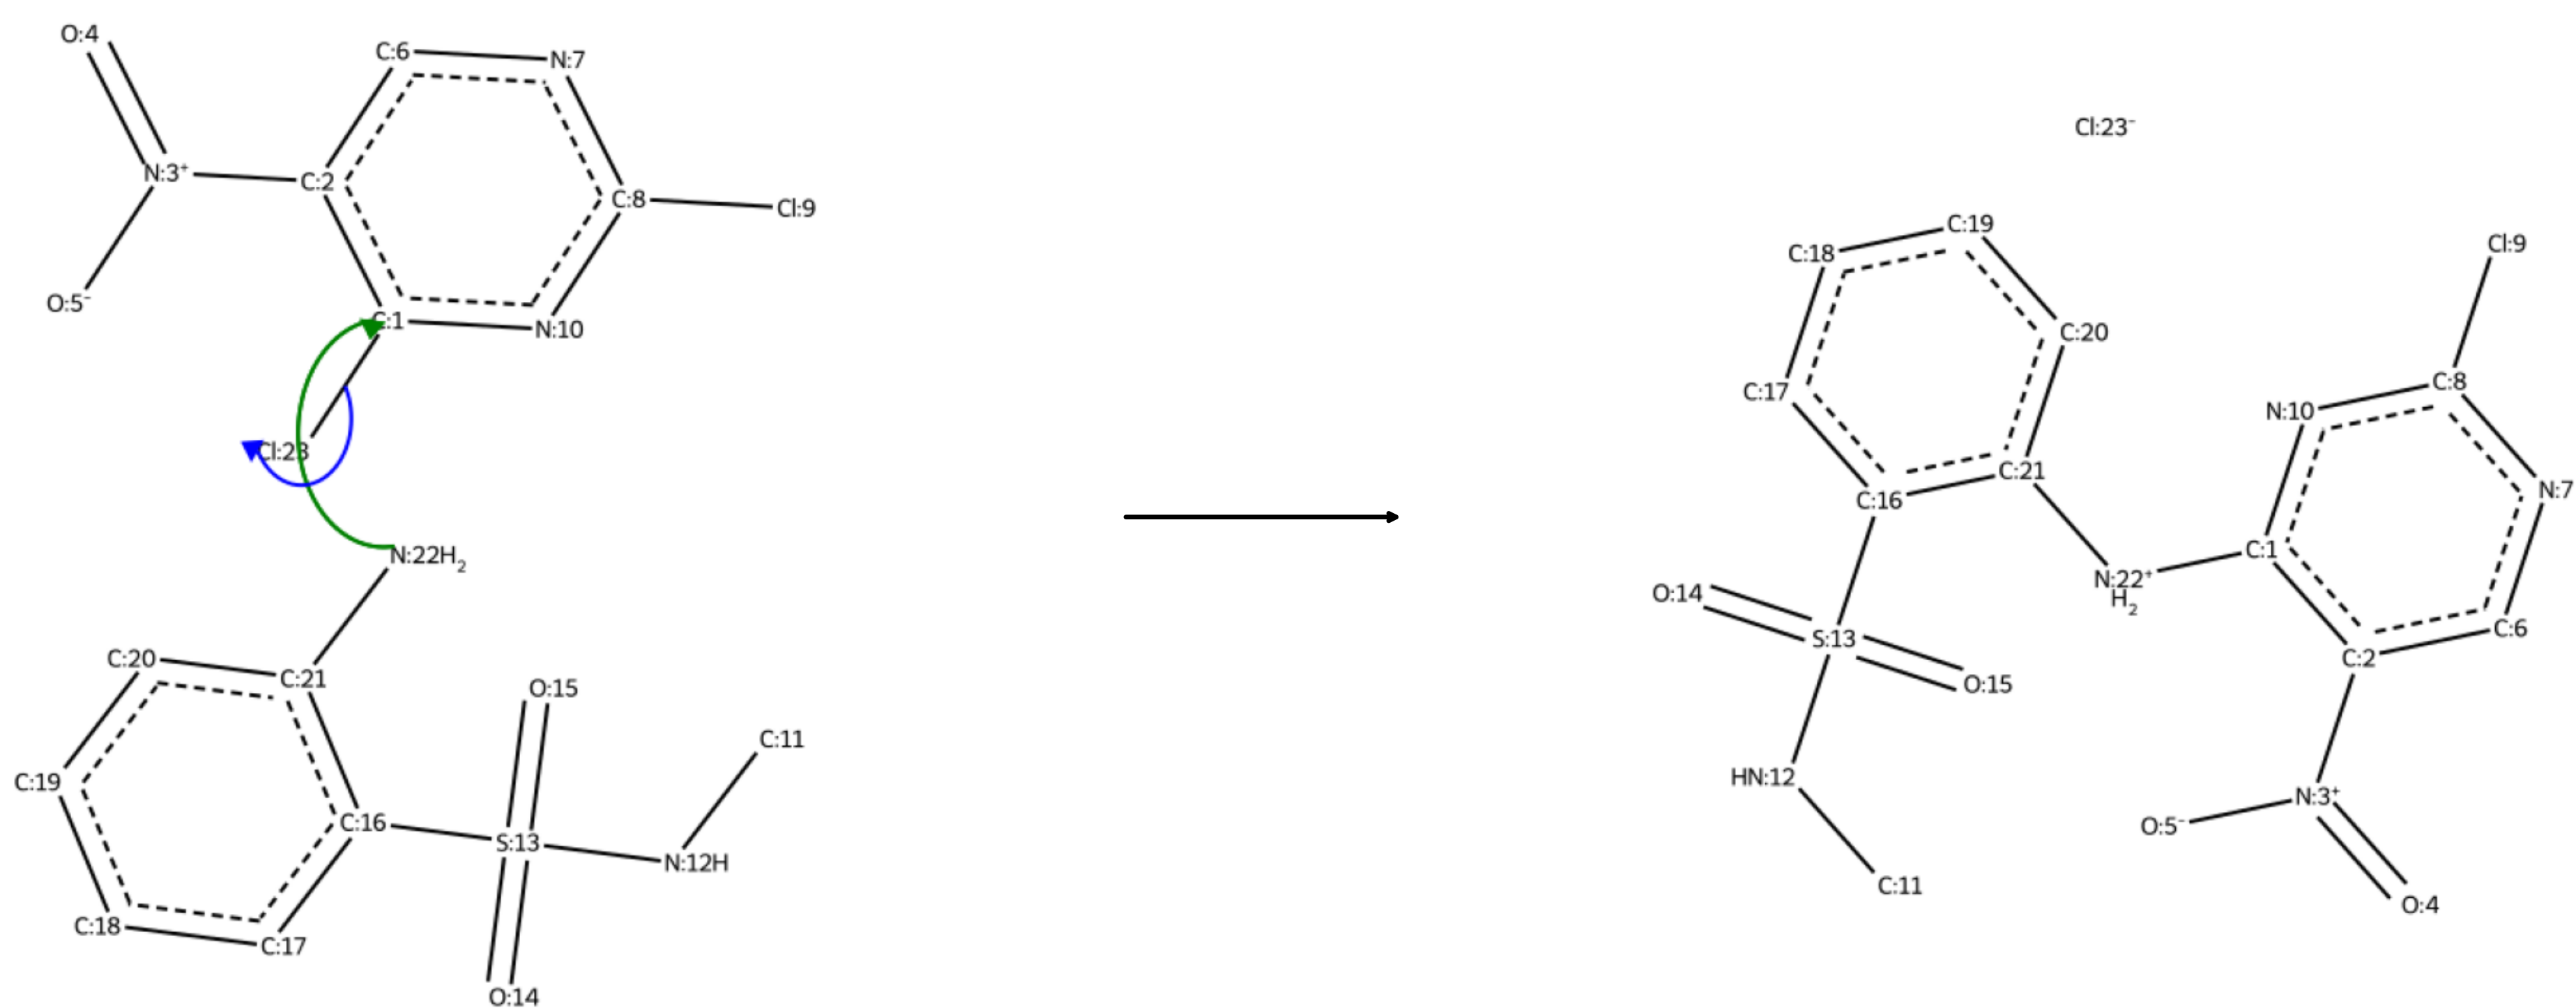

# Original reaction RXN\_ID:67

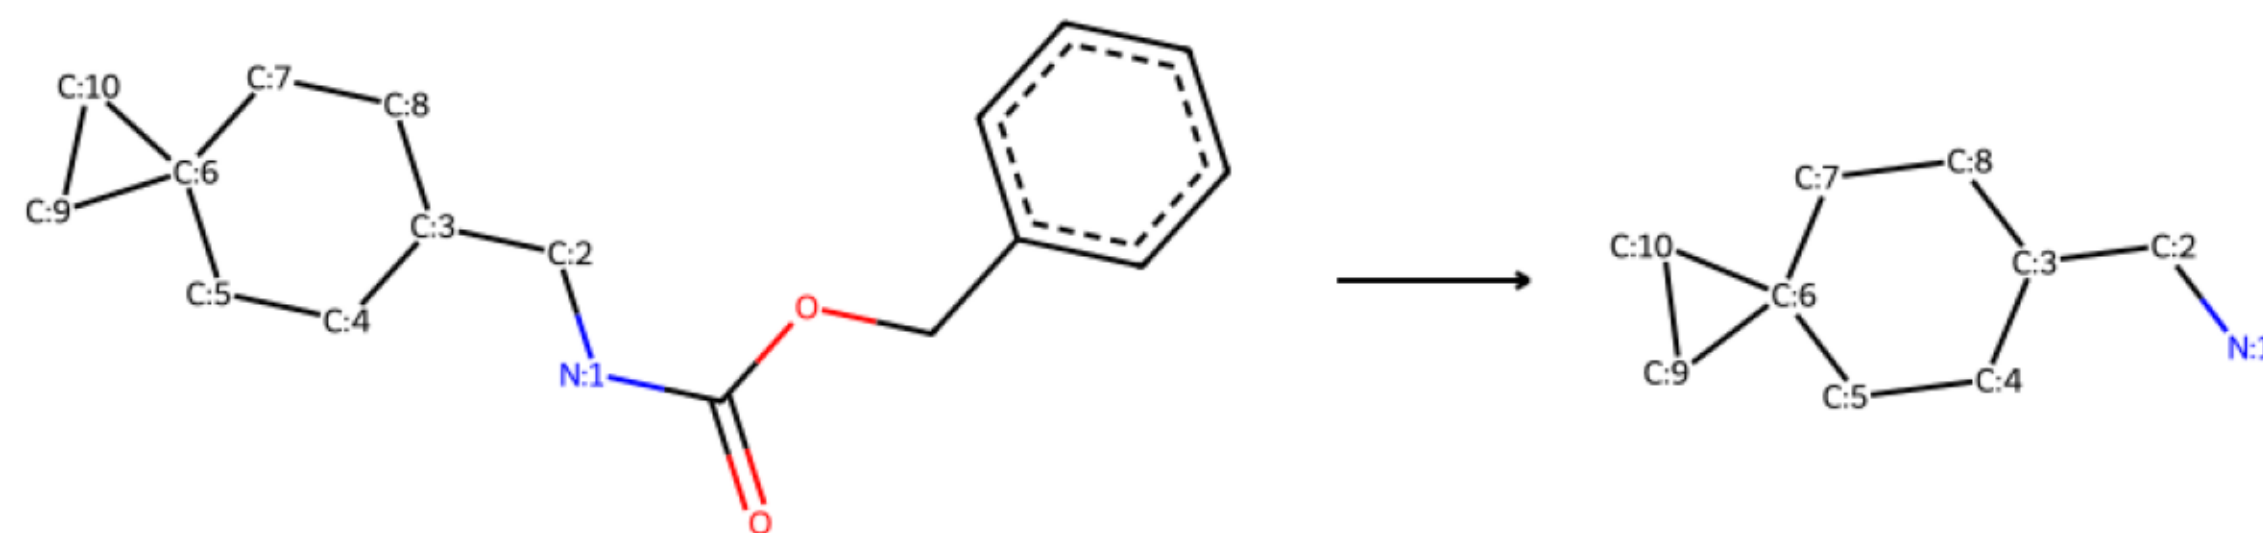

## ELECTRO-generated mechanistic pathway

[Arrow order: (1) green, (2) blue, (3) red, (4) orange]

step #1

Product(s)

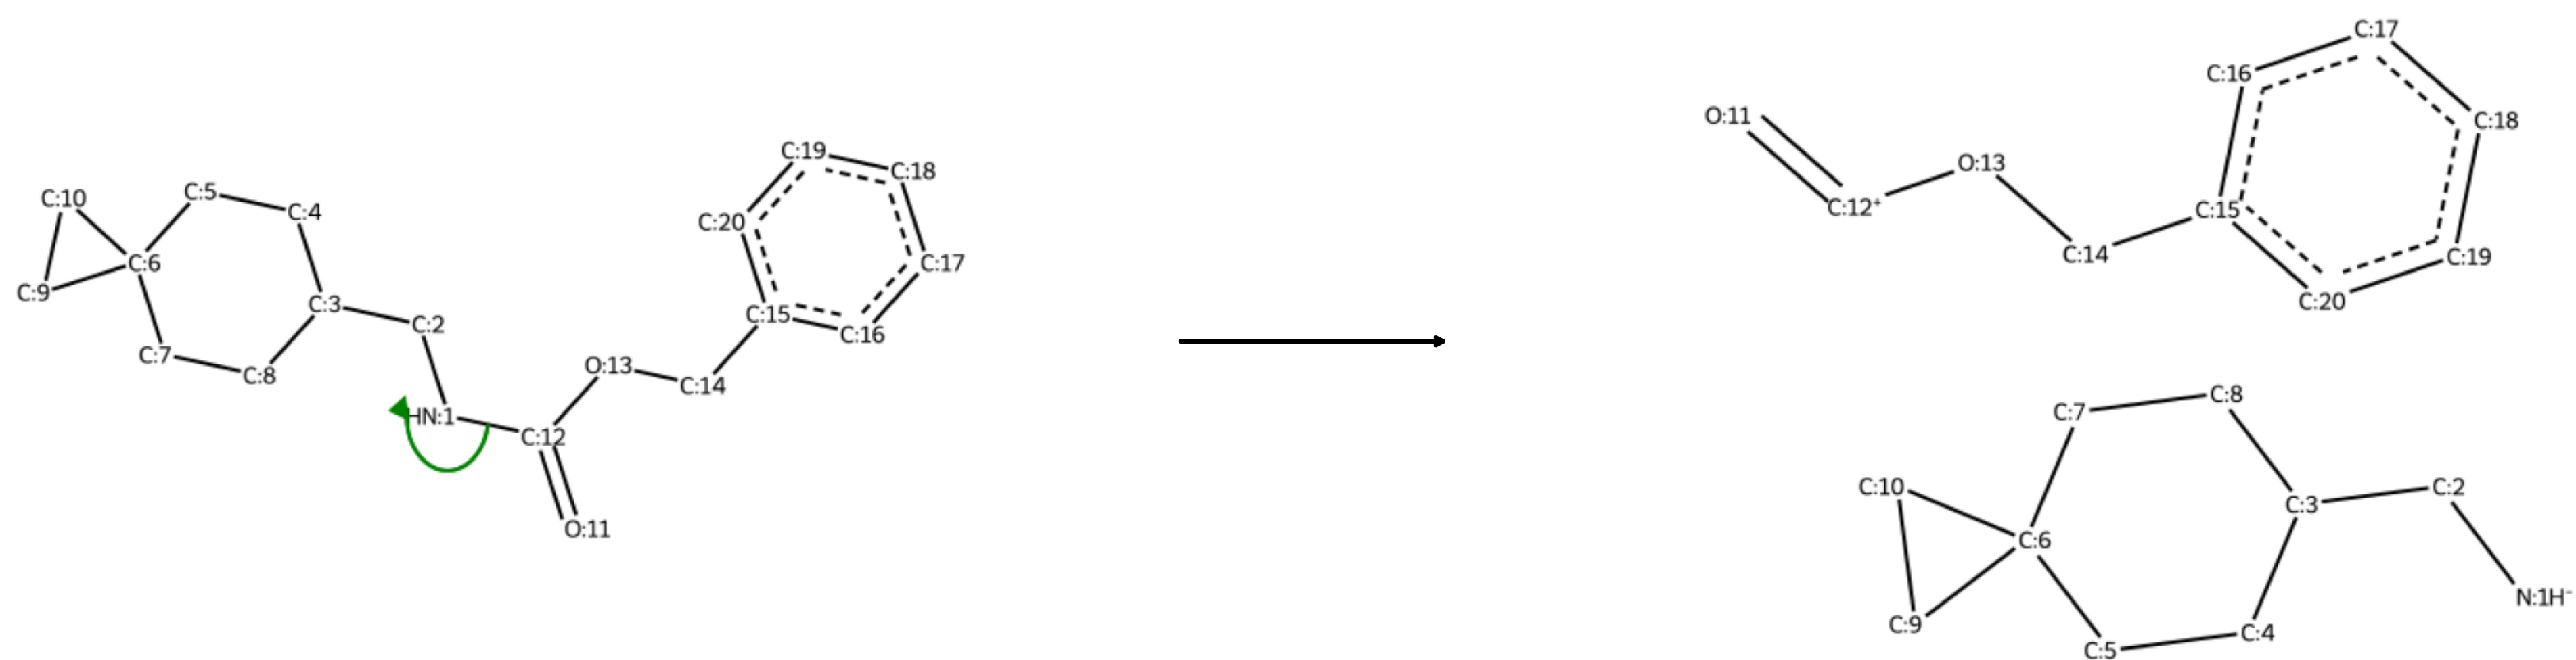



# Original reaction RXN\_ID:68

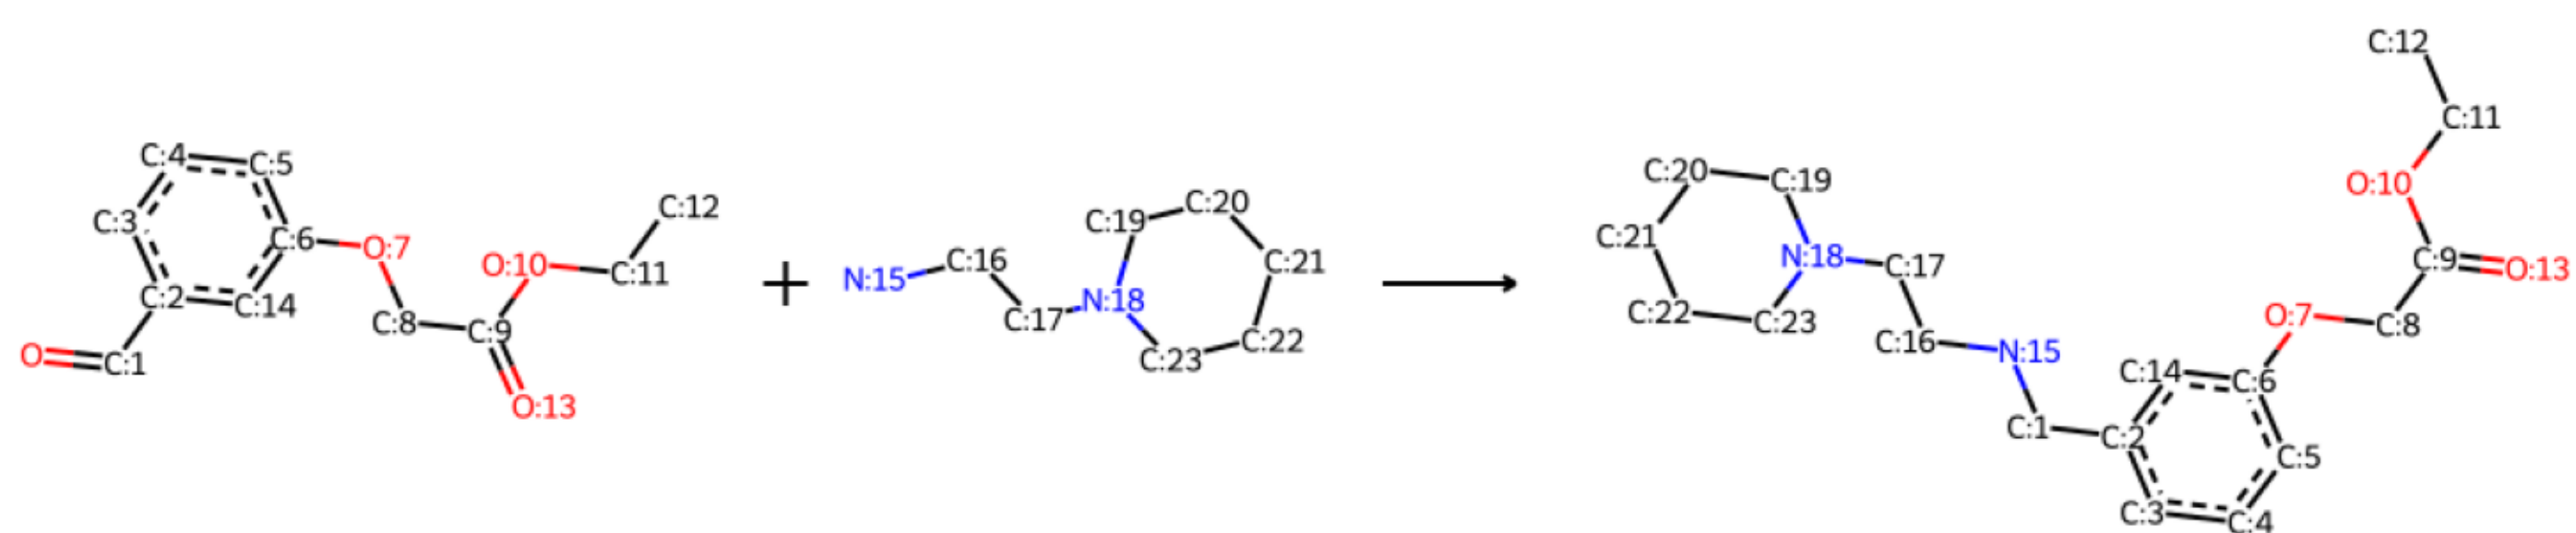

## ELECTRO-generated mechanistic pathway

[Arrow order: (1) green, (2) blue, (3) red, (4) orange]

step #1

Product(s)

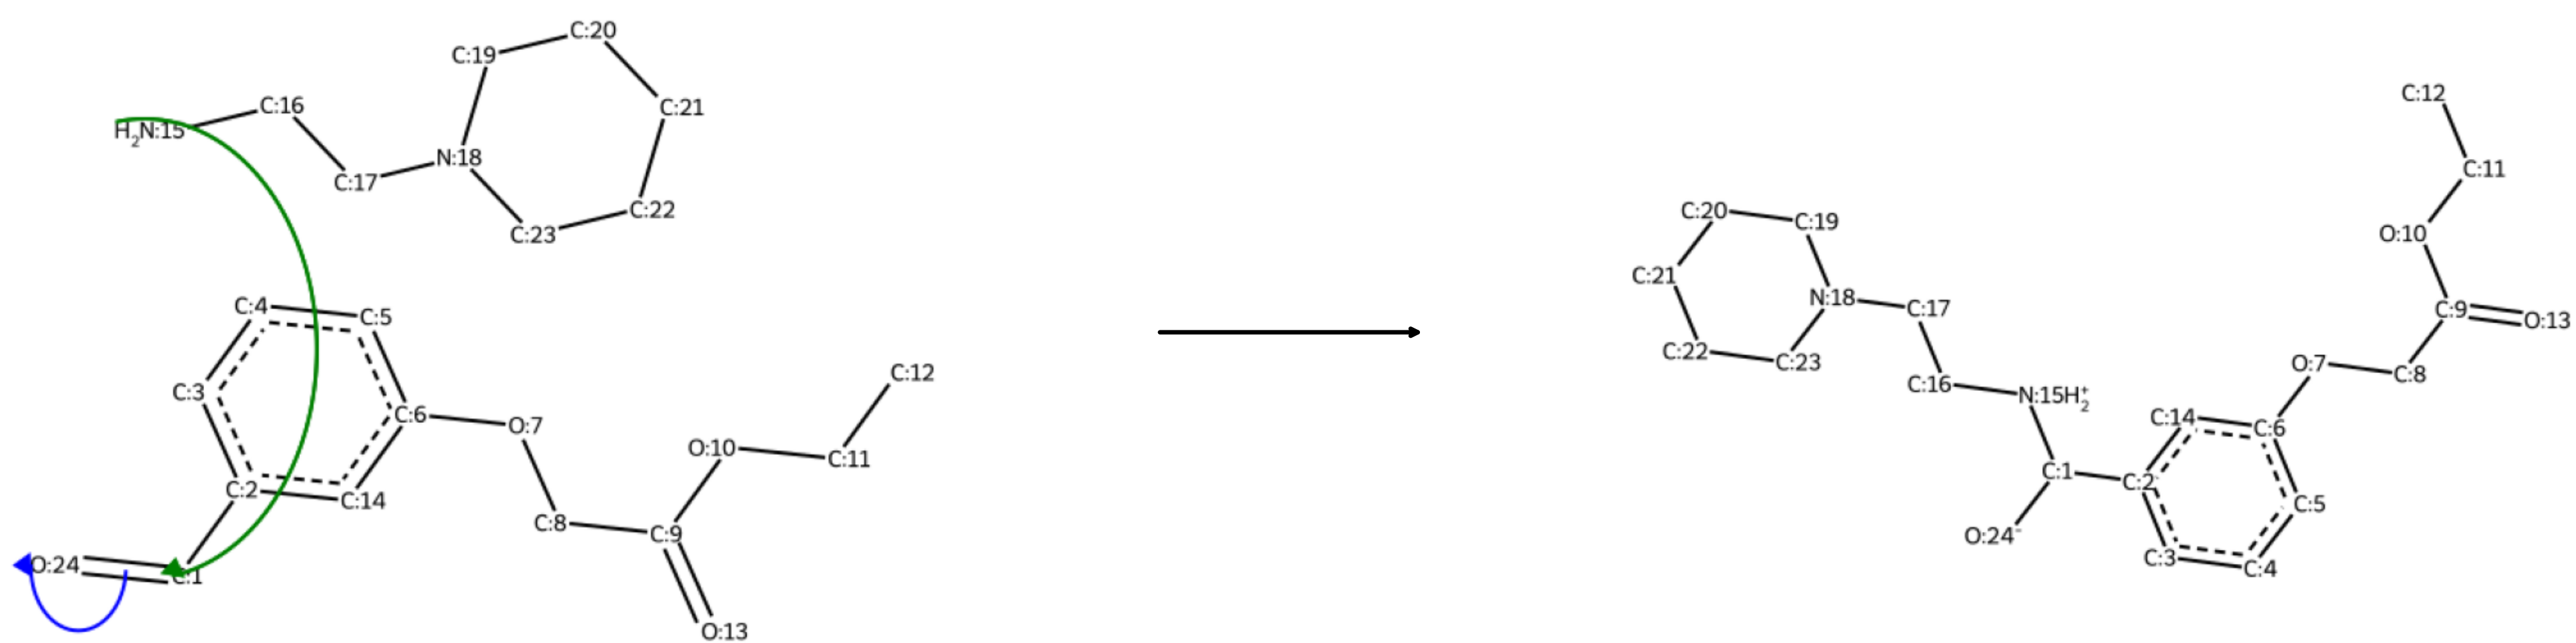

# Original reaction RXN\_ID:69

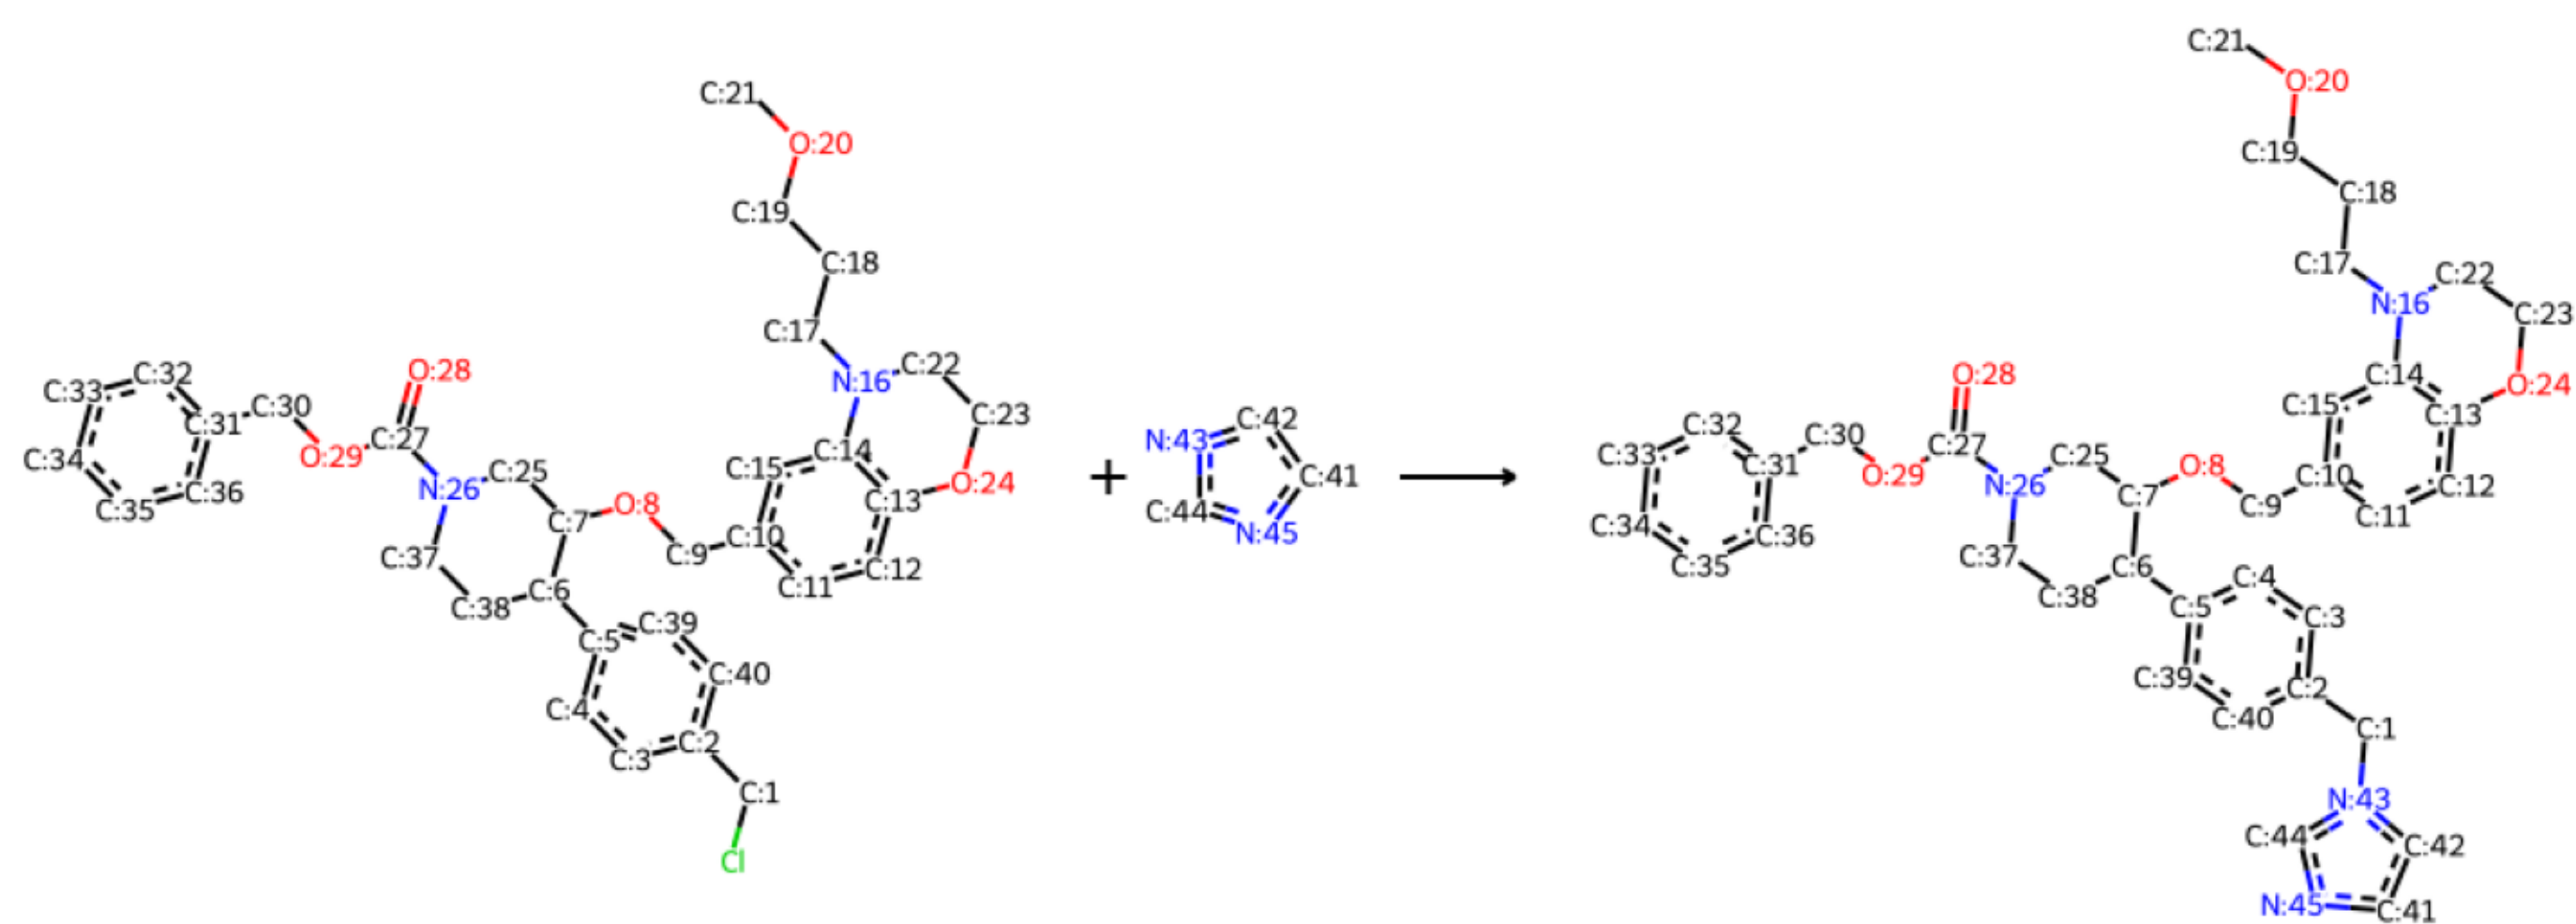

## ELECTRO-generated mechanistic pathway

[Arrow order: (1) green, (2) blue, (3) red, (4) orange]

step #1

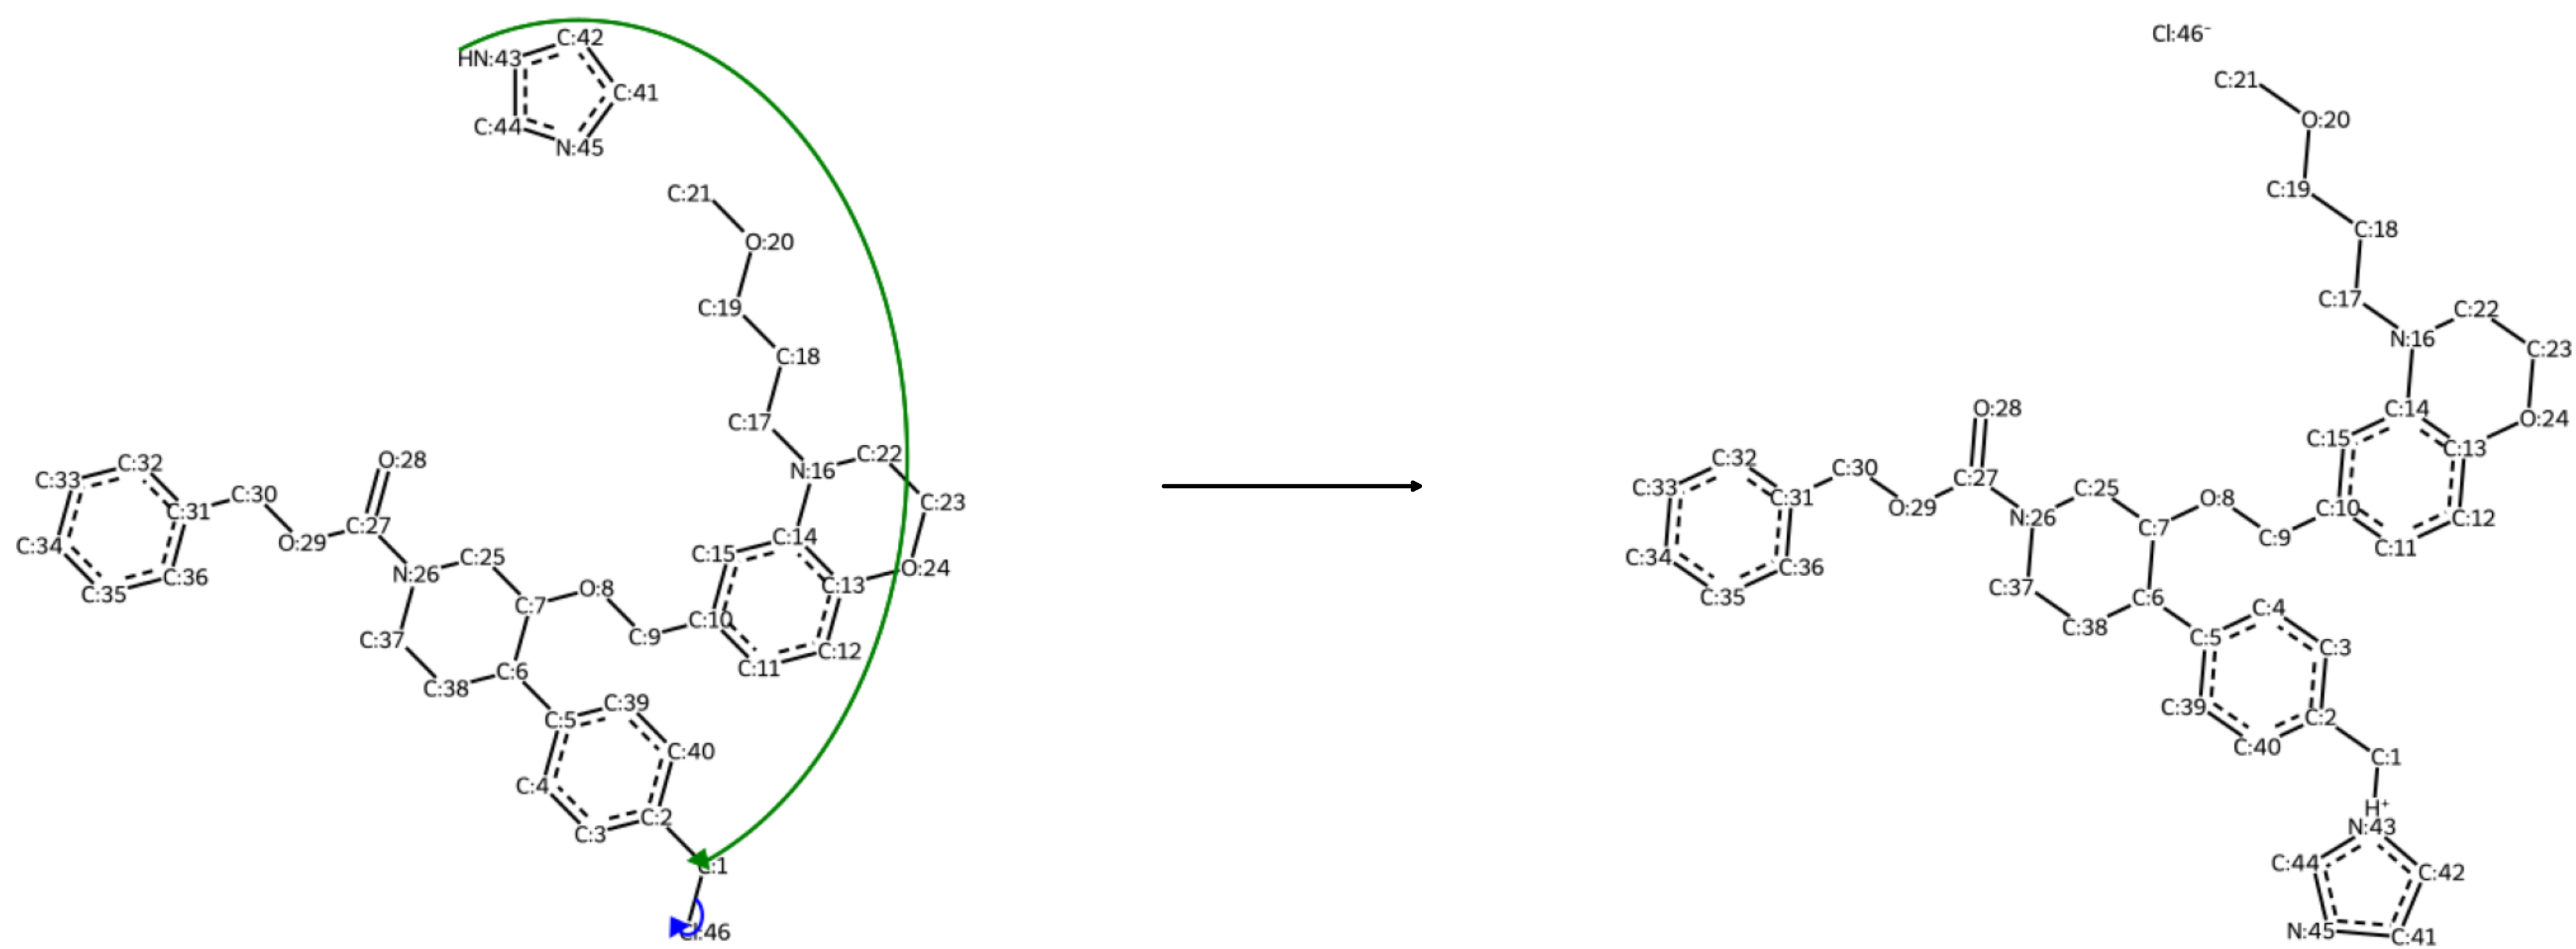



# Original reaction RXN\_ID:70

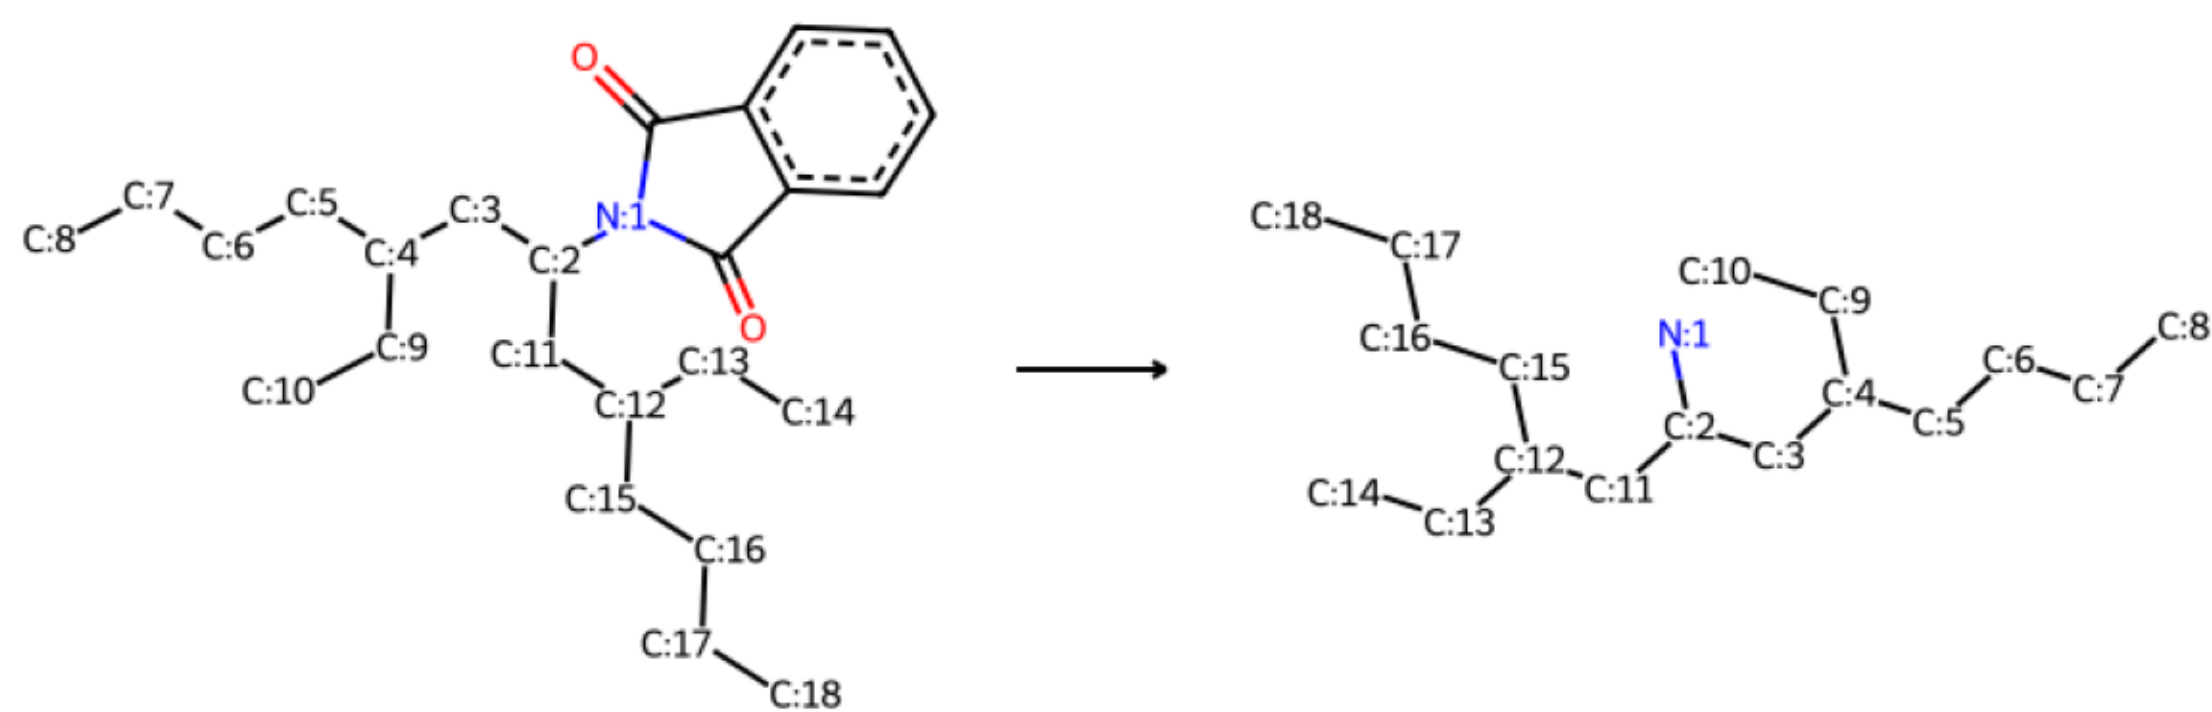

## ELECTRO-generated mechanistic pathway

[Arrow order: (1) green, (2) blue, (3) red, (4) orange]

step #1

Product(s)

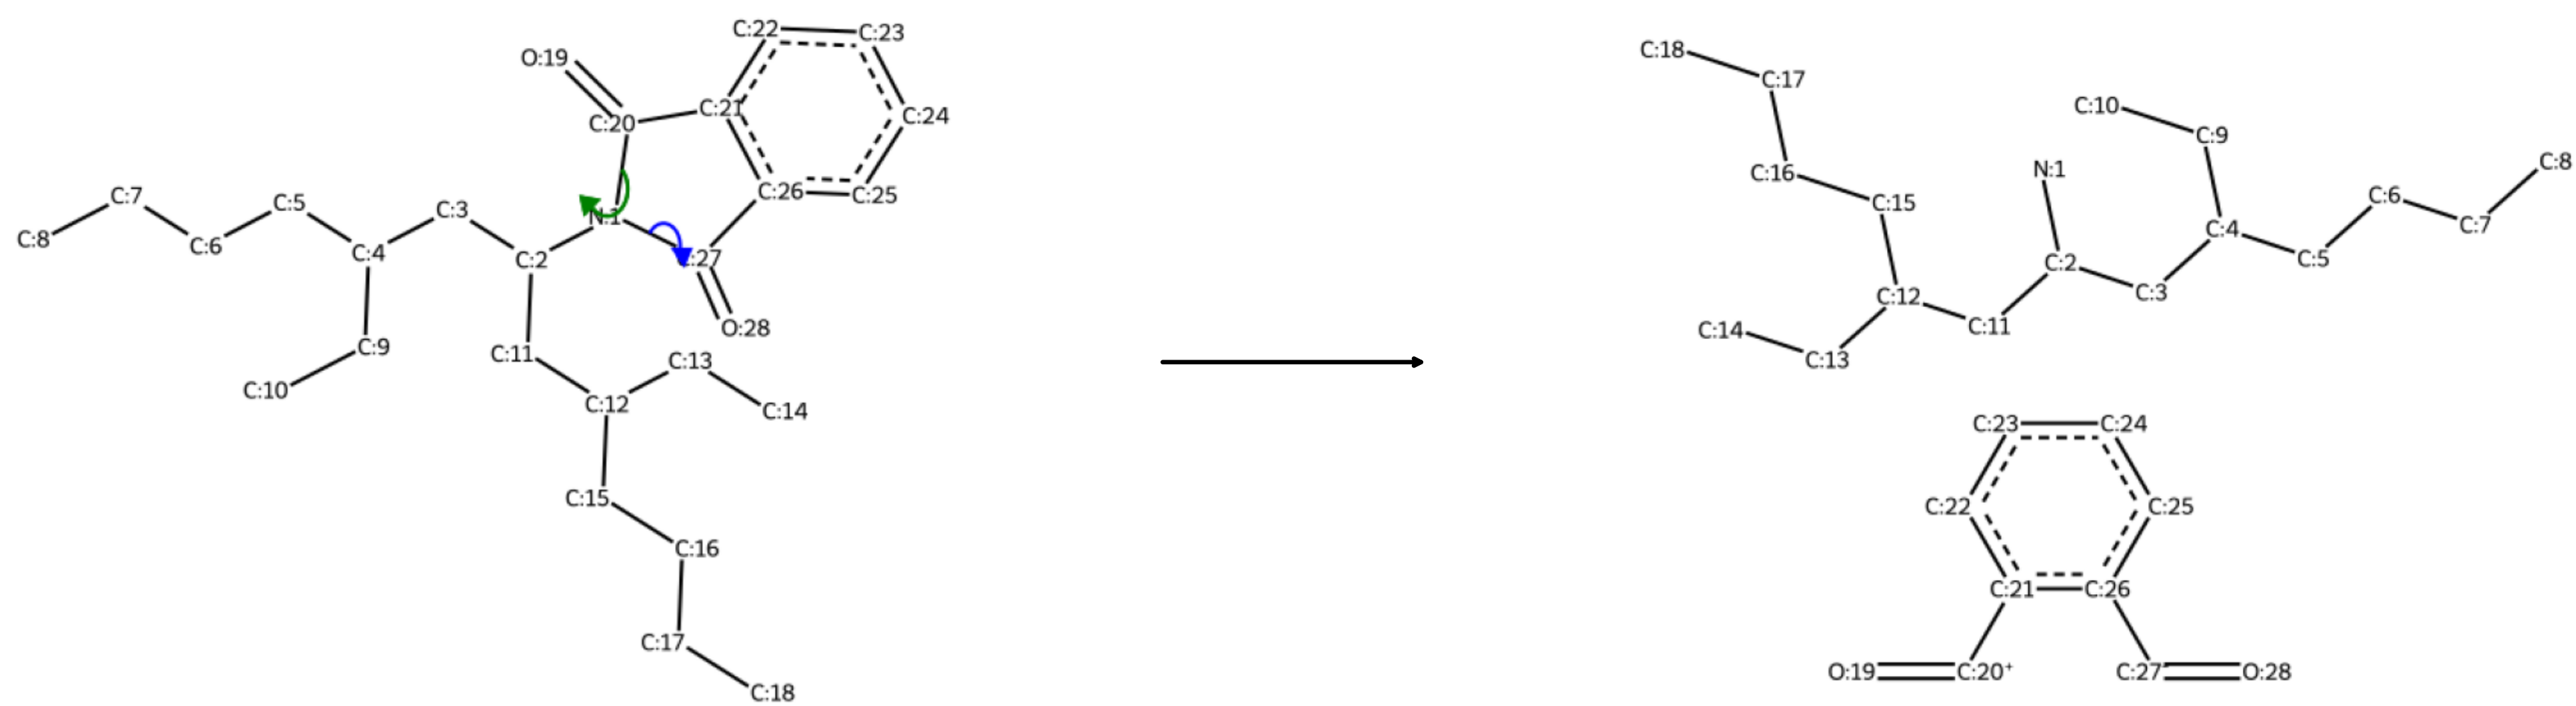

# Original reaction RXN\_ID:71

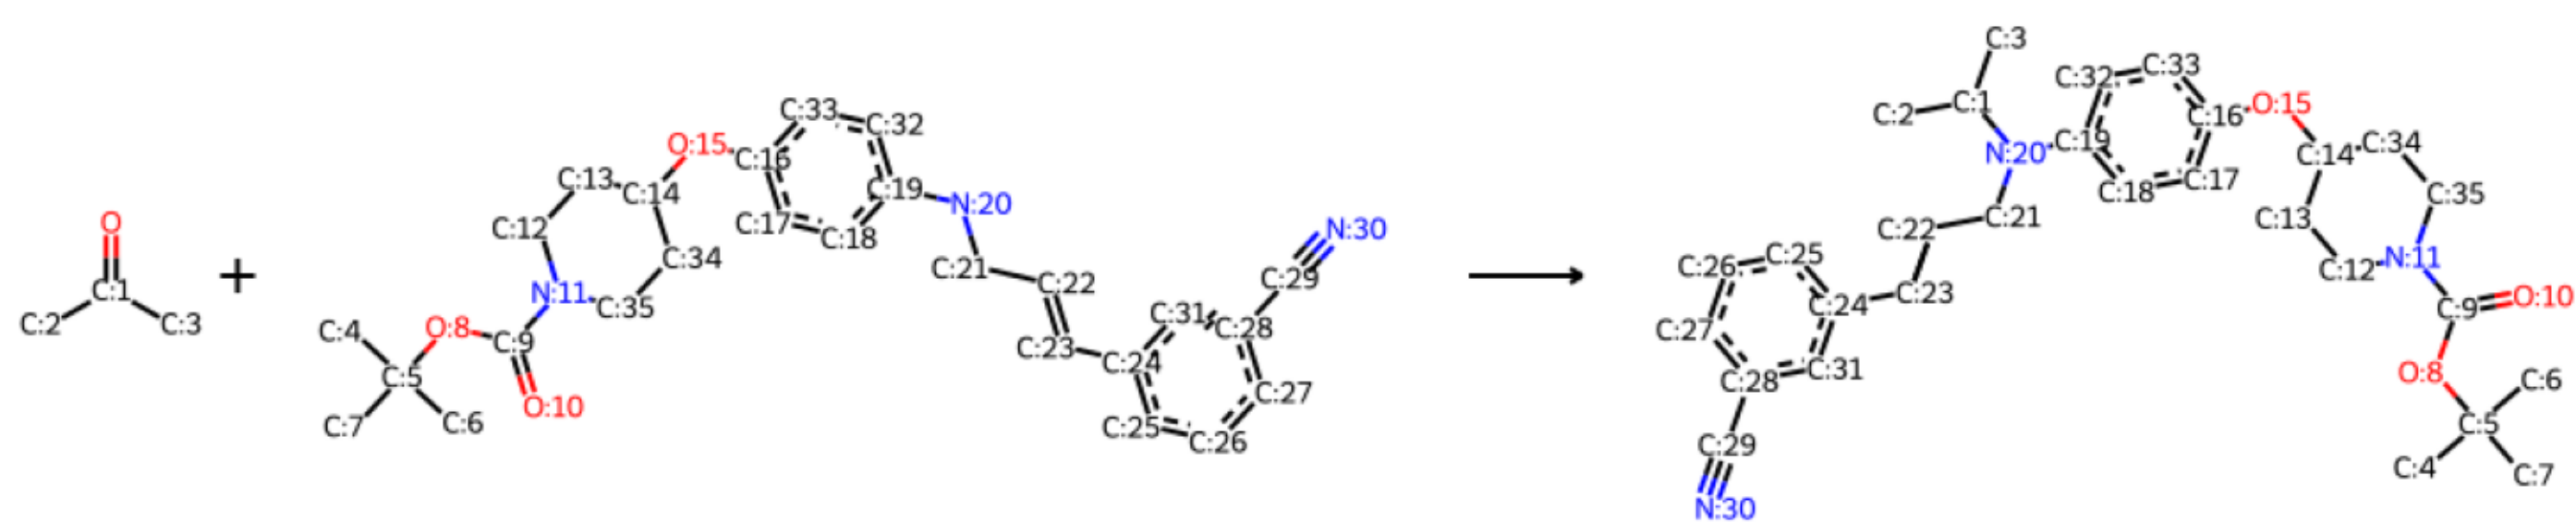

## ELECTRO-generated mechanistic pathway

[Arrow order: (1) green, (2) blue, (3) red, (4) orange]

step #1

Product(s)

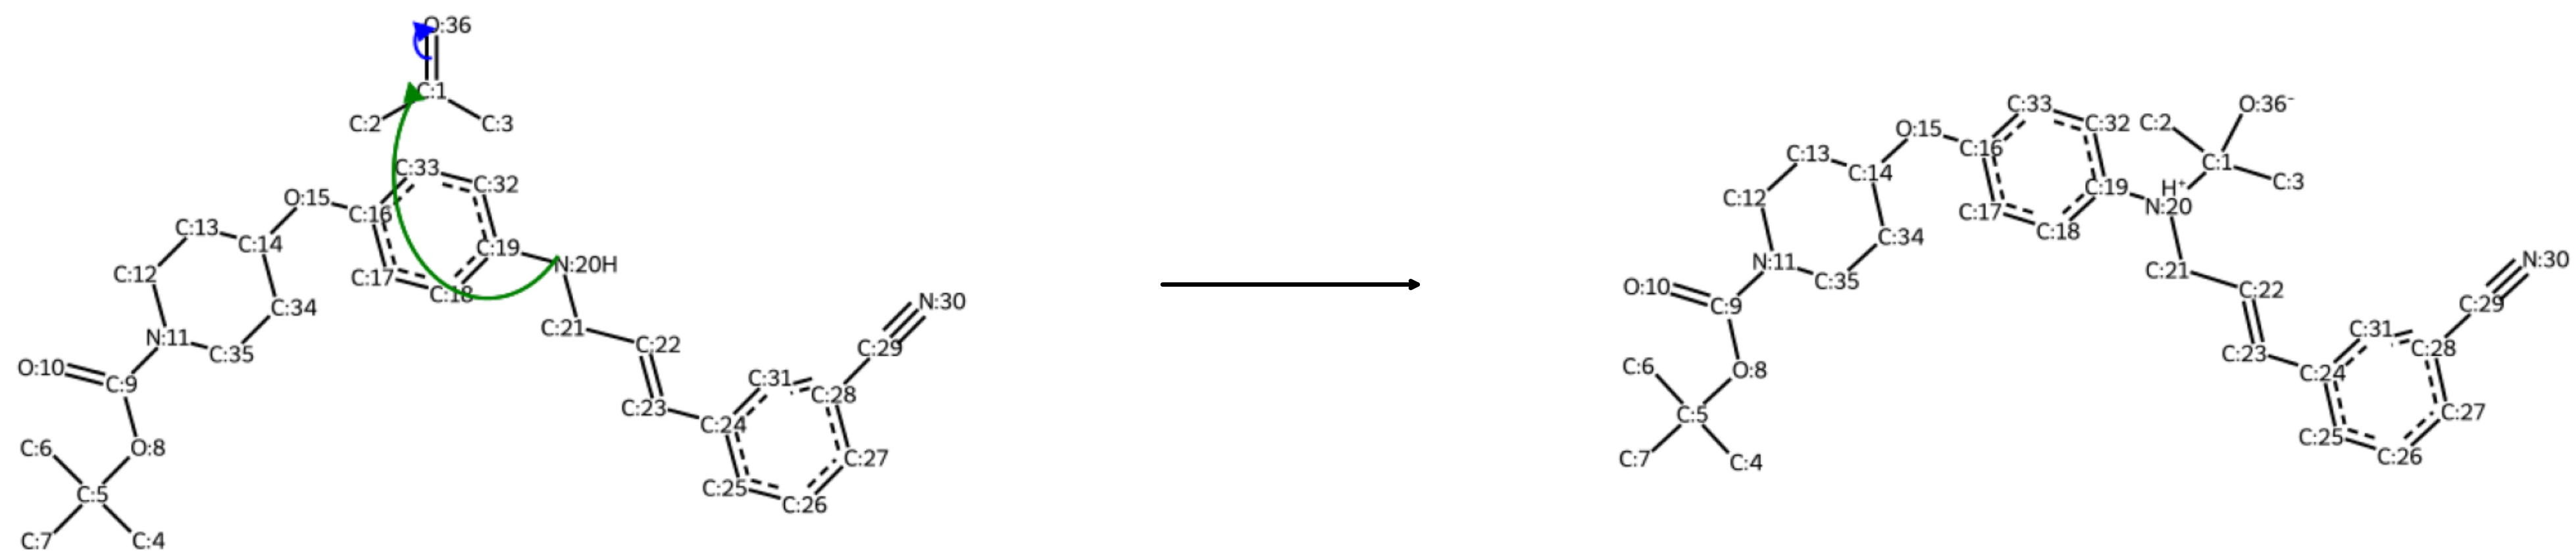



# Original reaction RXN\_ID:72

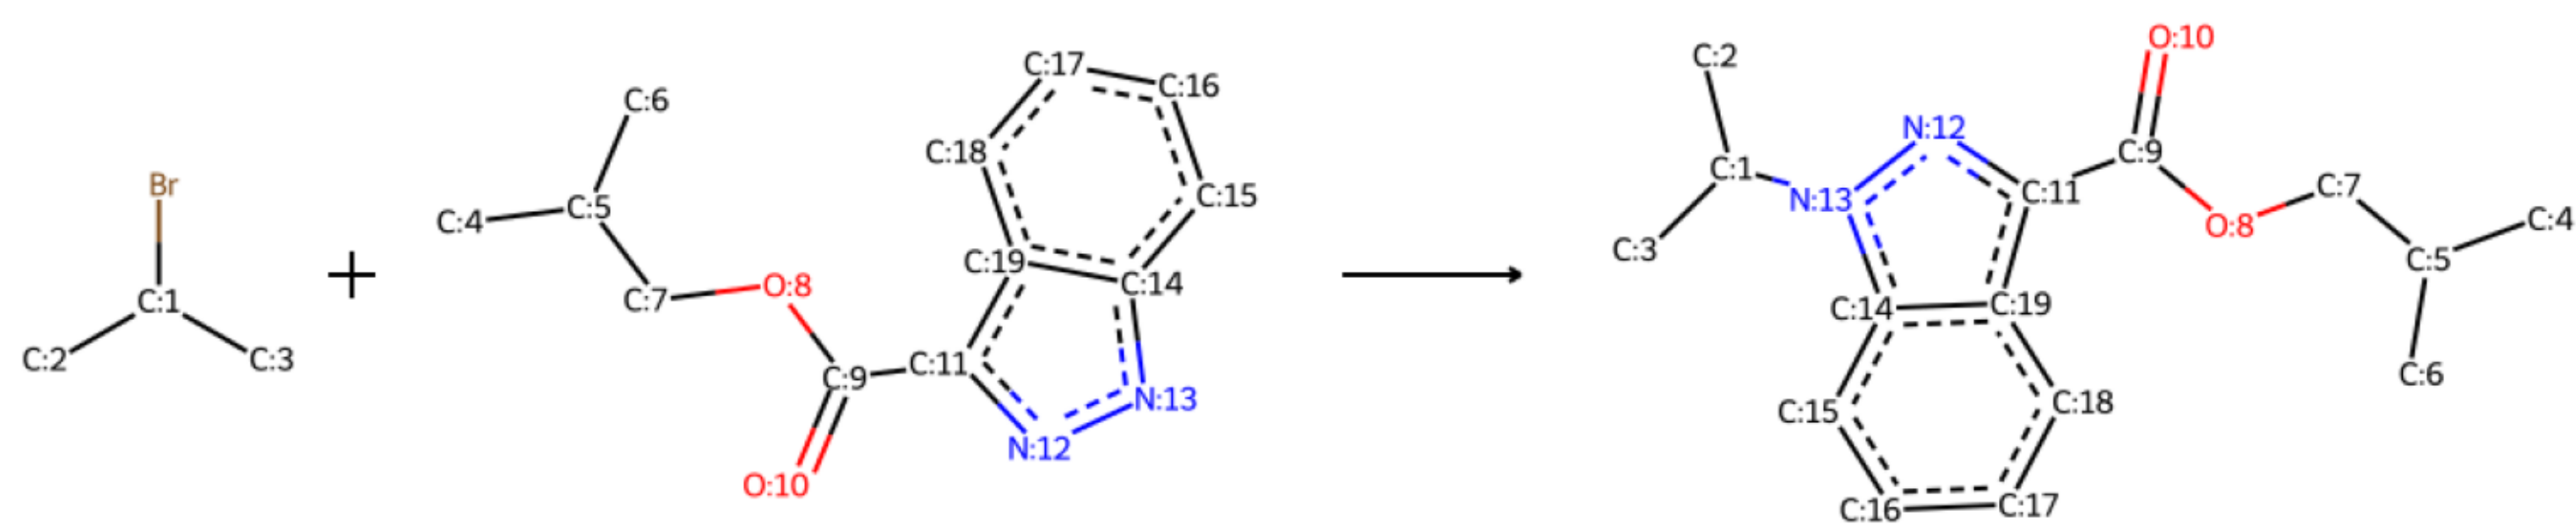

## ELECTRO-generated mechanistic pathway

[Arrow order: (1) green, (2) blue, (3) red, (4) orange]

step #1

Product(s)

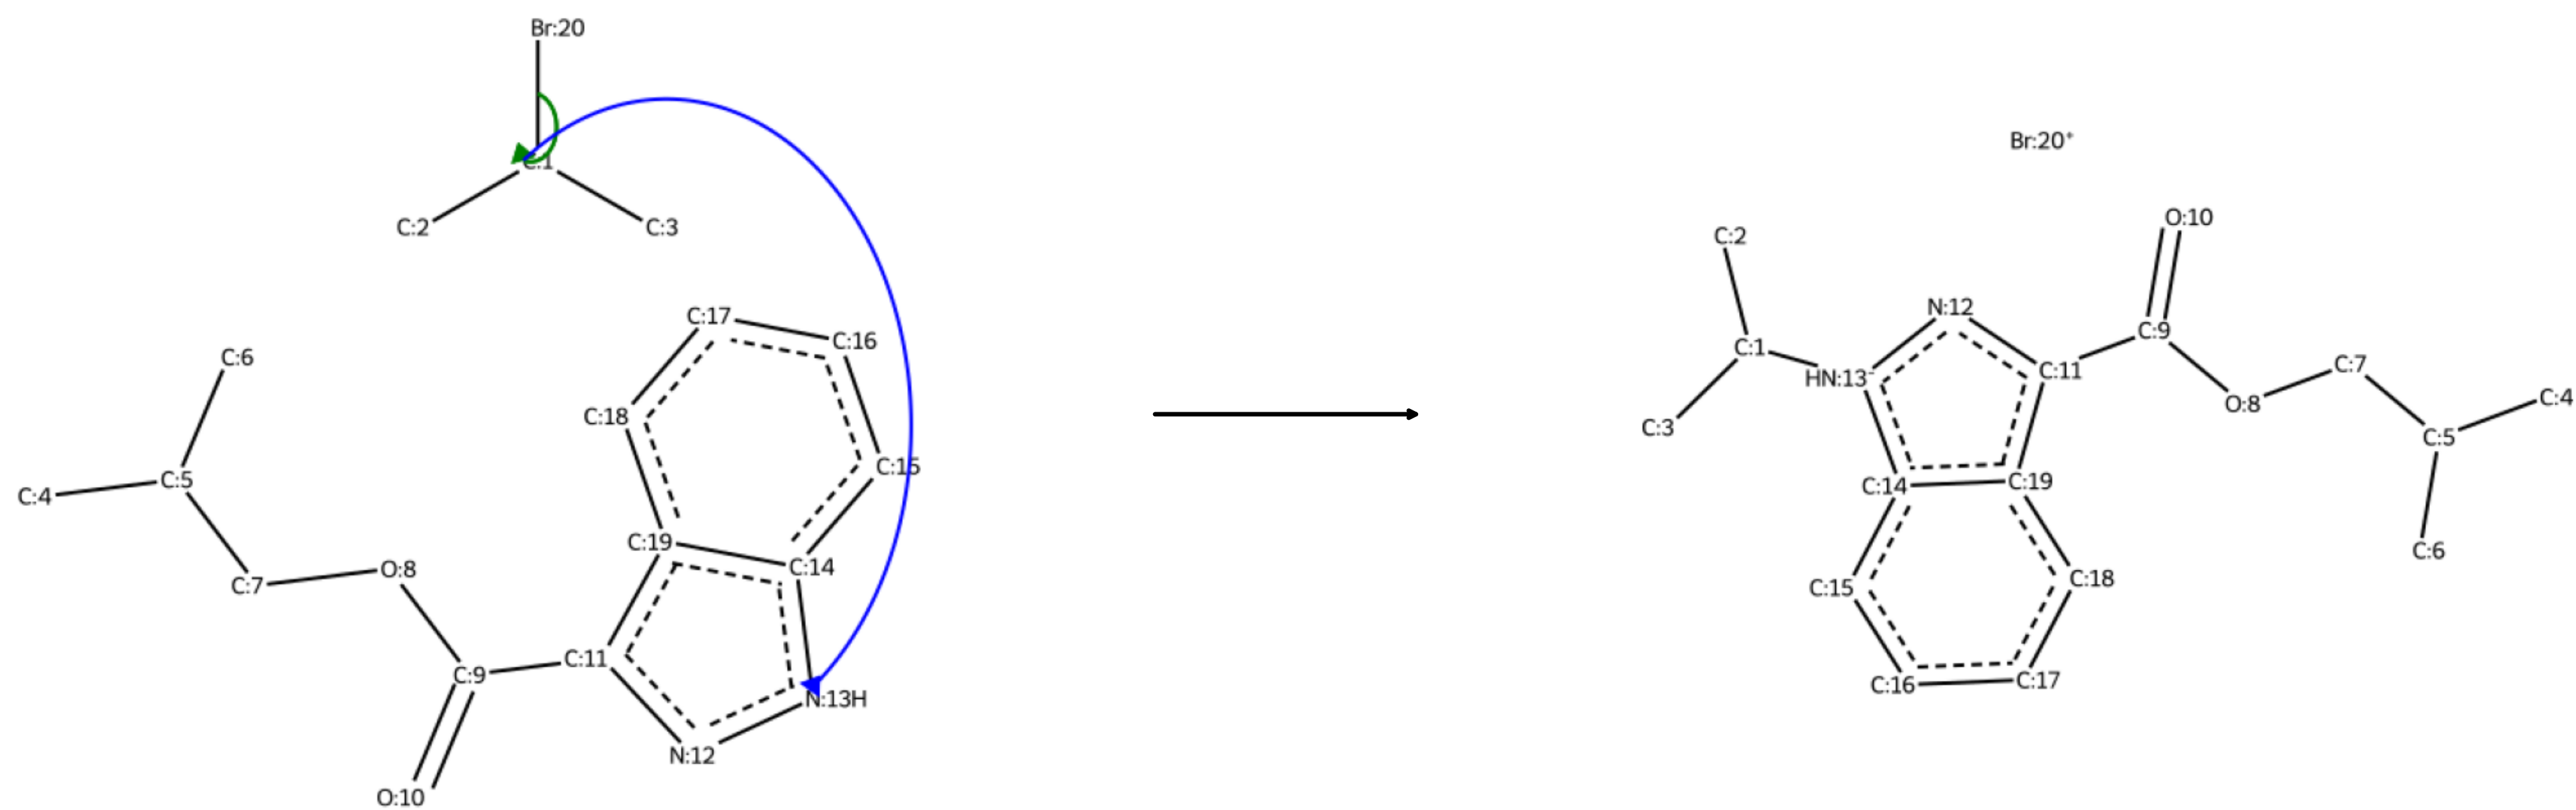

# Original reaction RXN\_ID:73

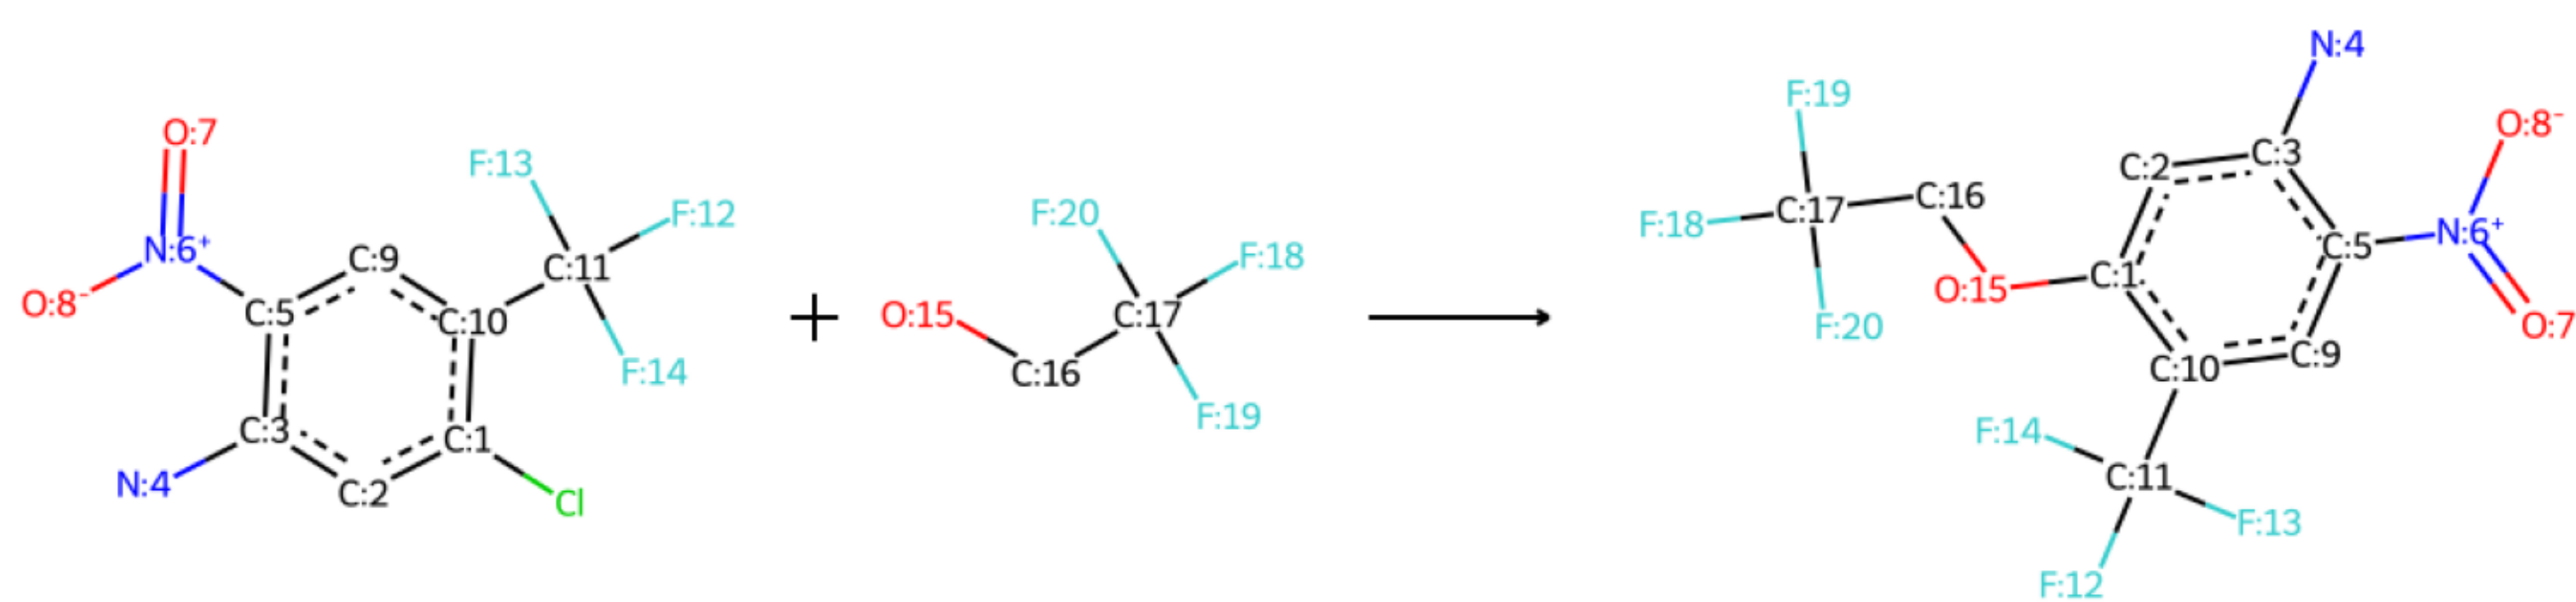

## ELECTRO-generated mechanistic pathway

[Arrow order: (1) green, (2) blue, (3) red, (4) orange]

step #1

Product(s)

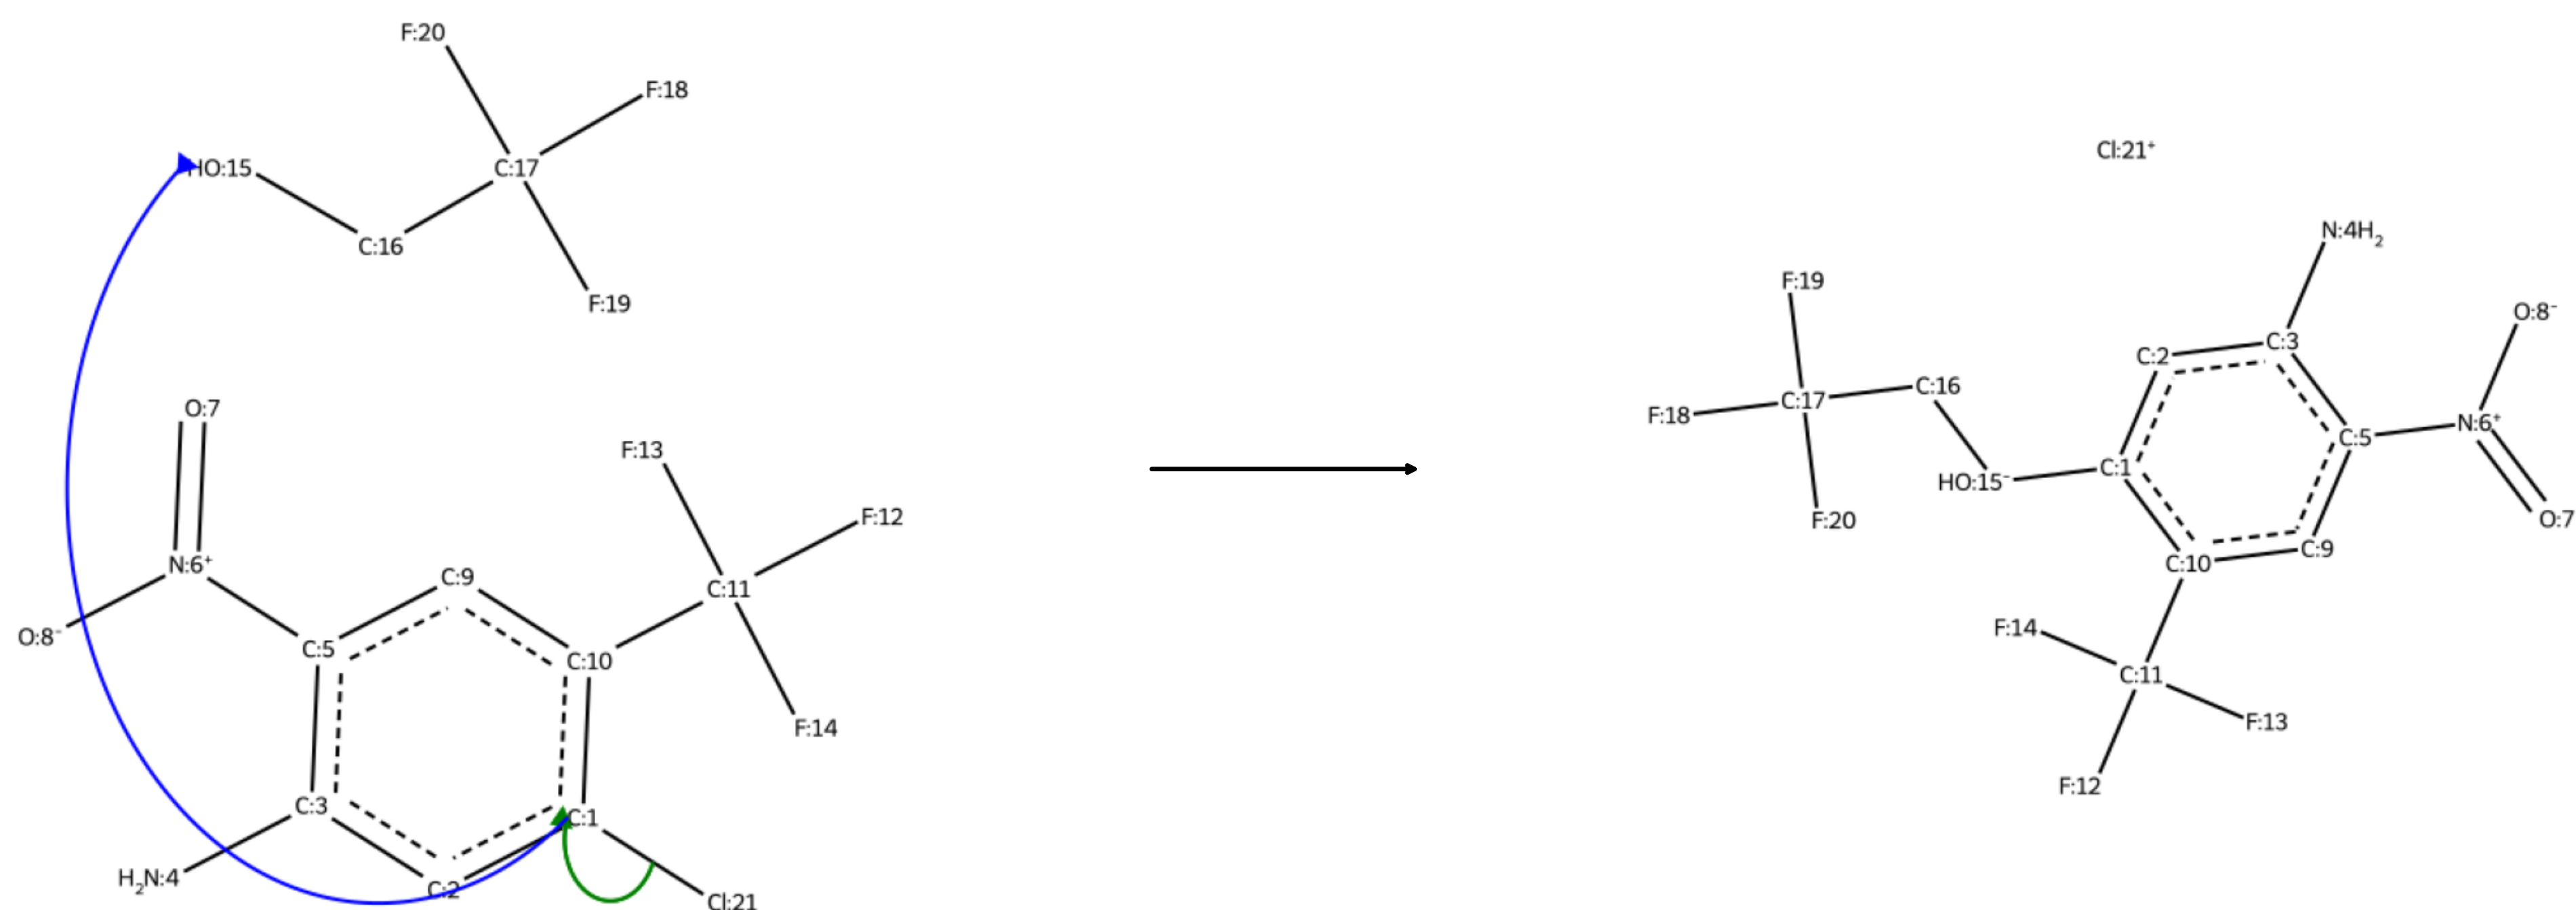



# Original reaction RXN\_ID:74

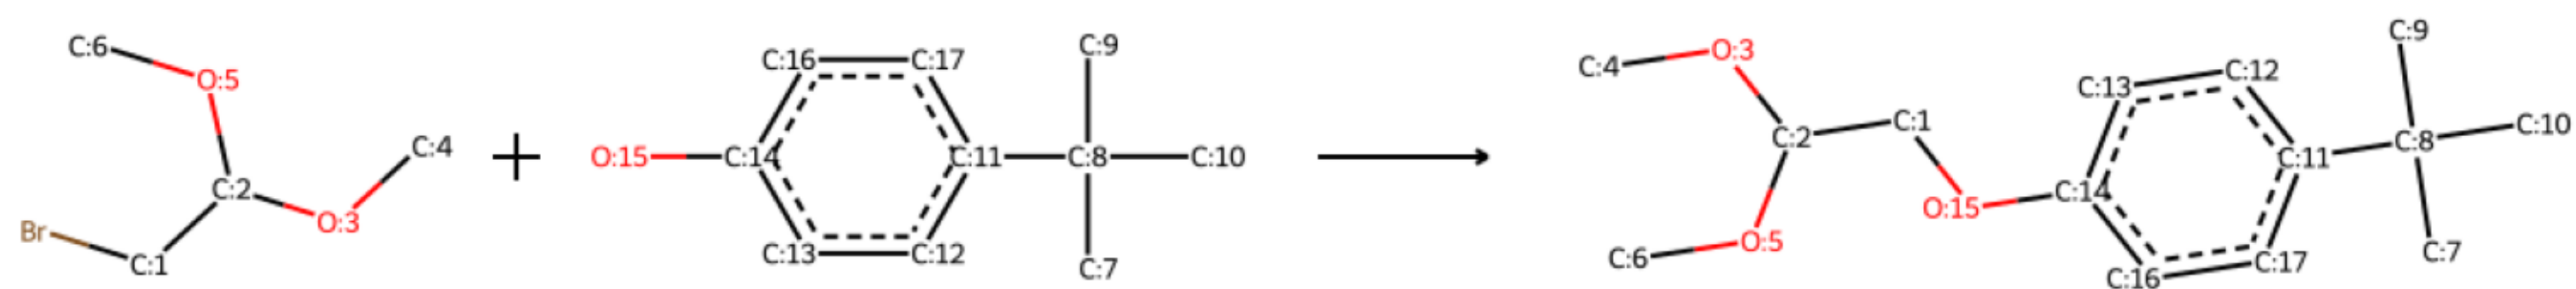

## ELECTRO-generated mechanistic pathway

[Arrow order: (1) green, (2) blue, (3) red, (4) orange]

step #1

Product(s)

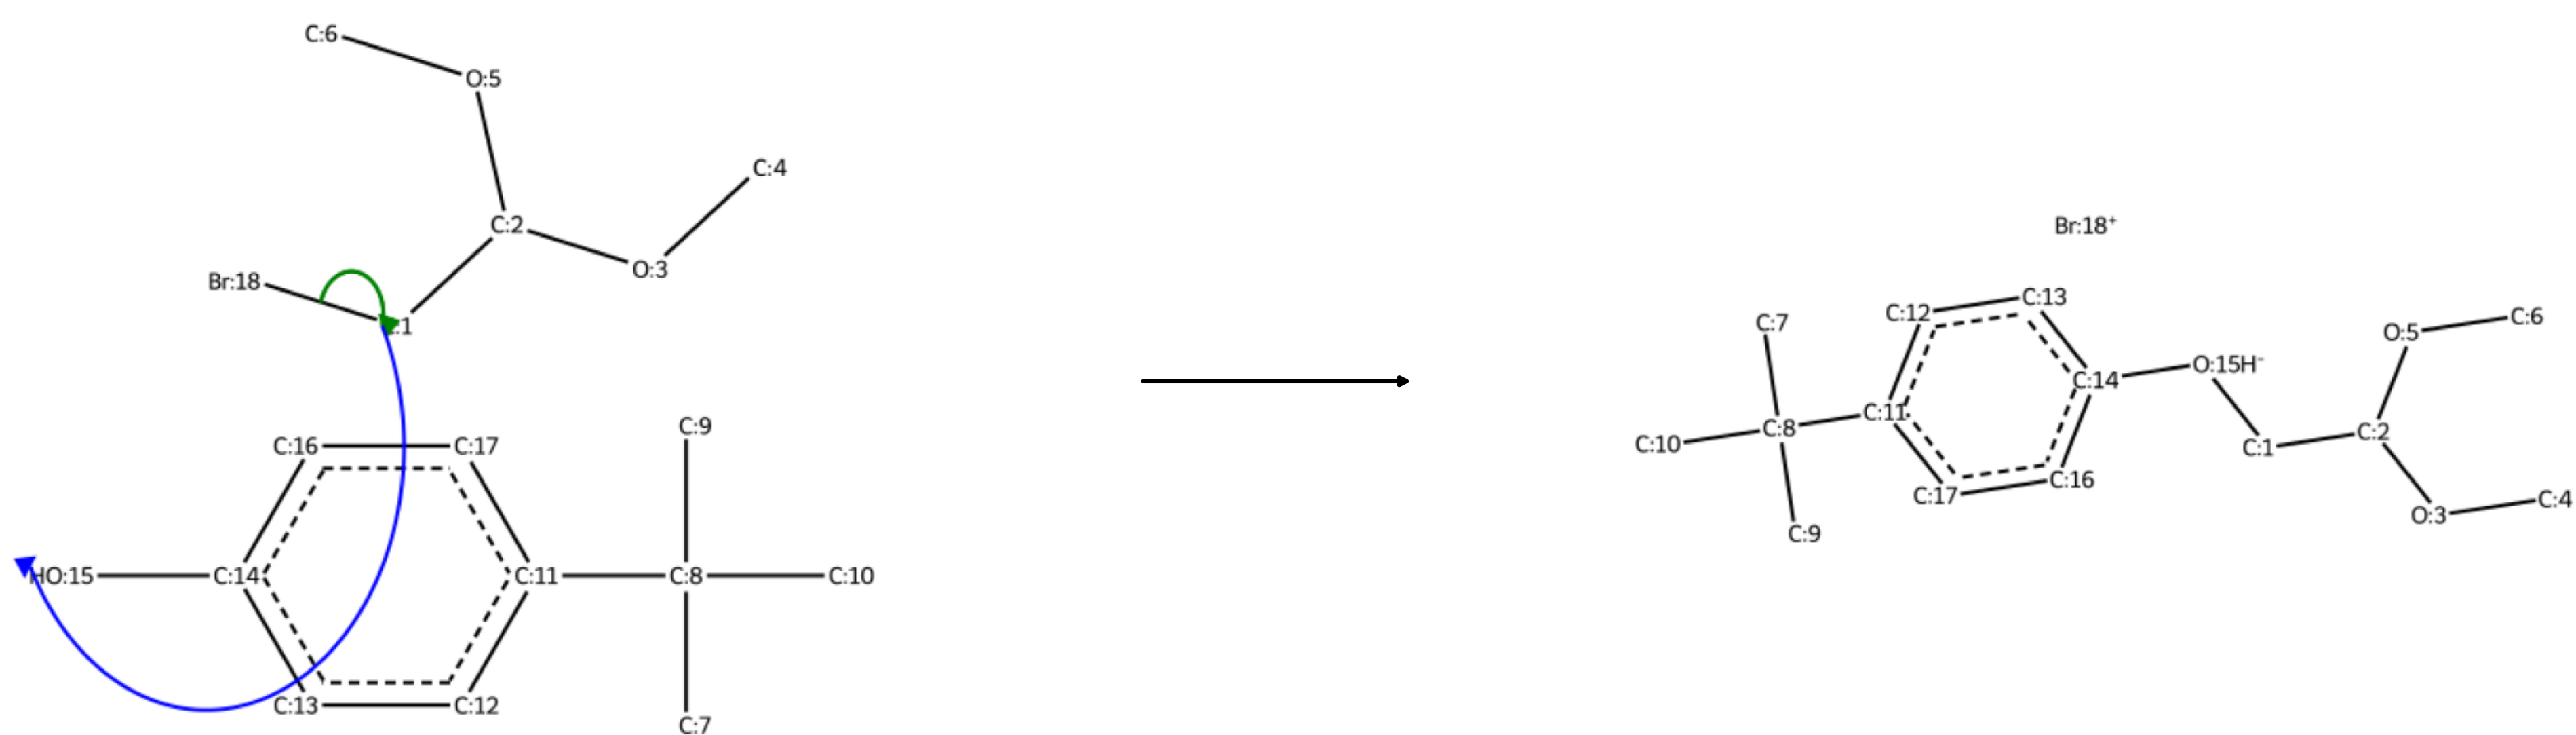

# Original reaction RXN\_ID:75

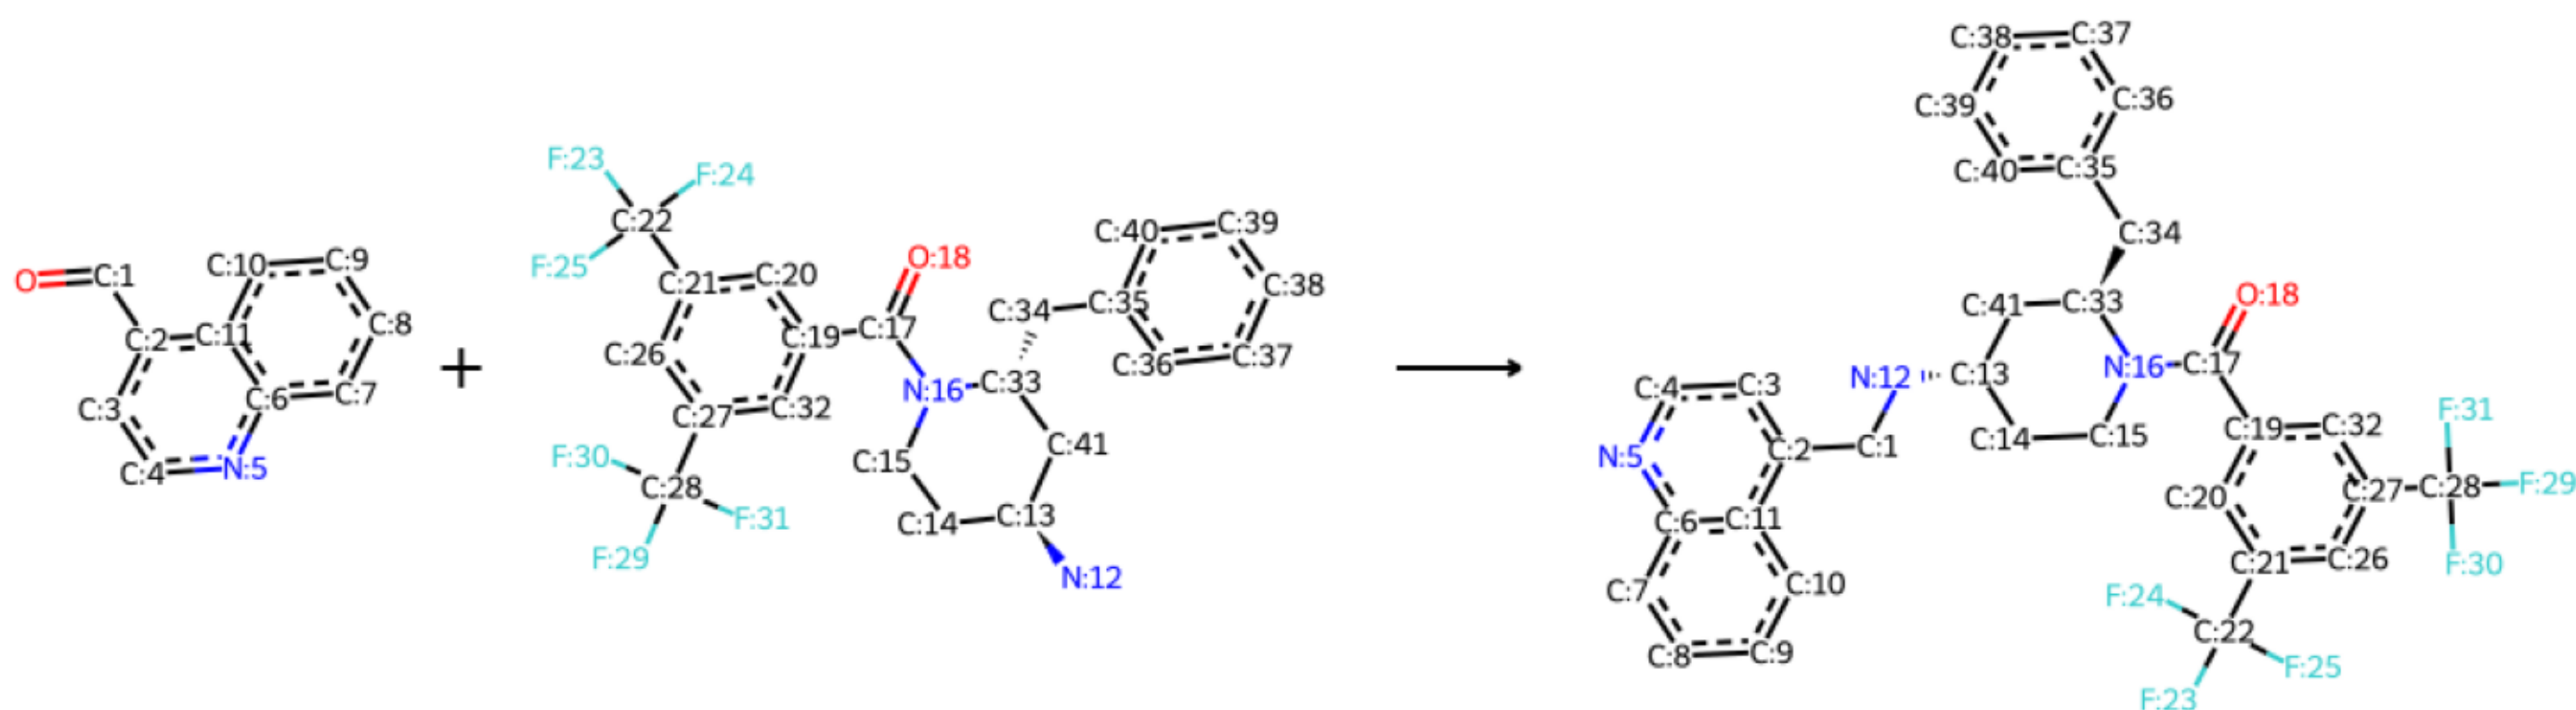

## ELECTRO-generated mechanistic pathway

[Arrow order: (1) green, (2) blue, (3) red, (4) orange]

step #1

Product(s)

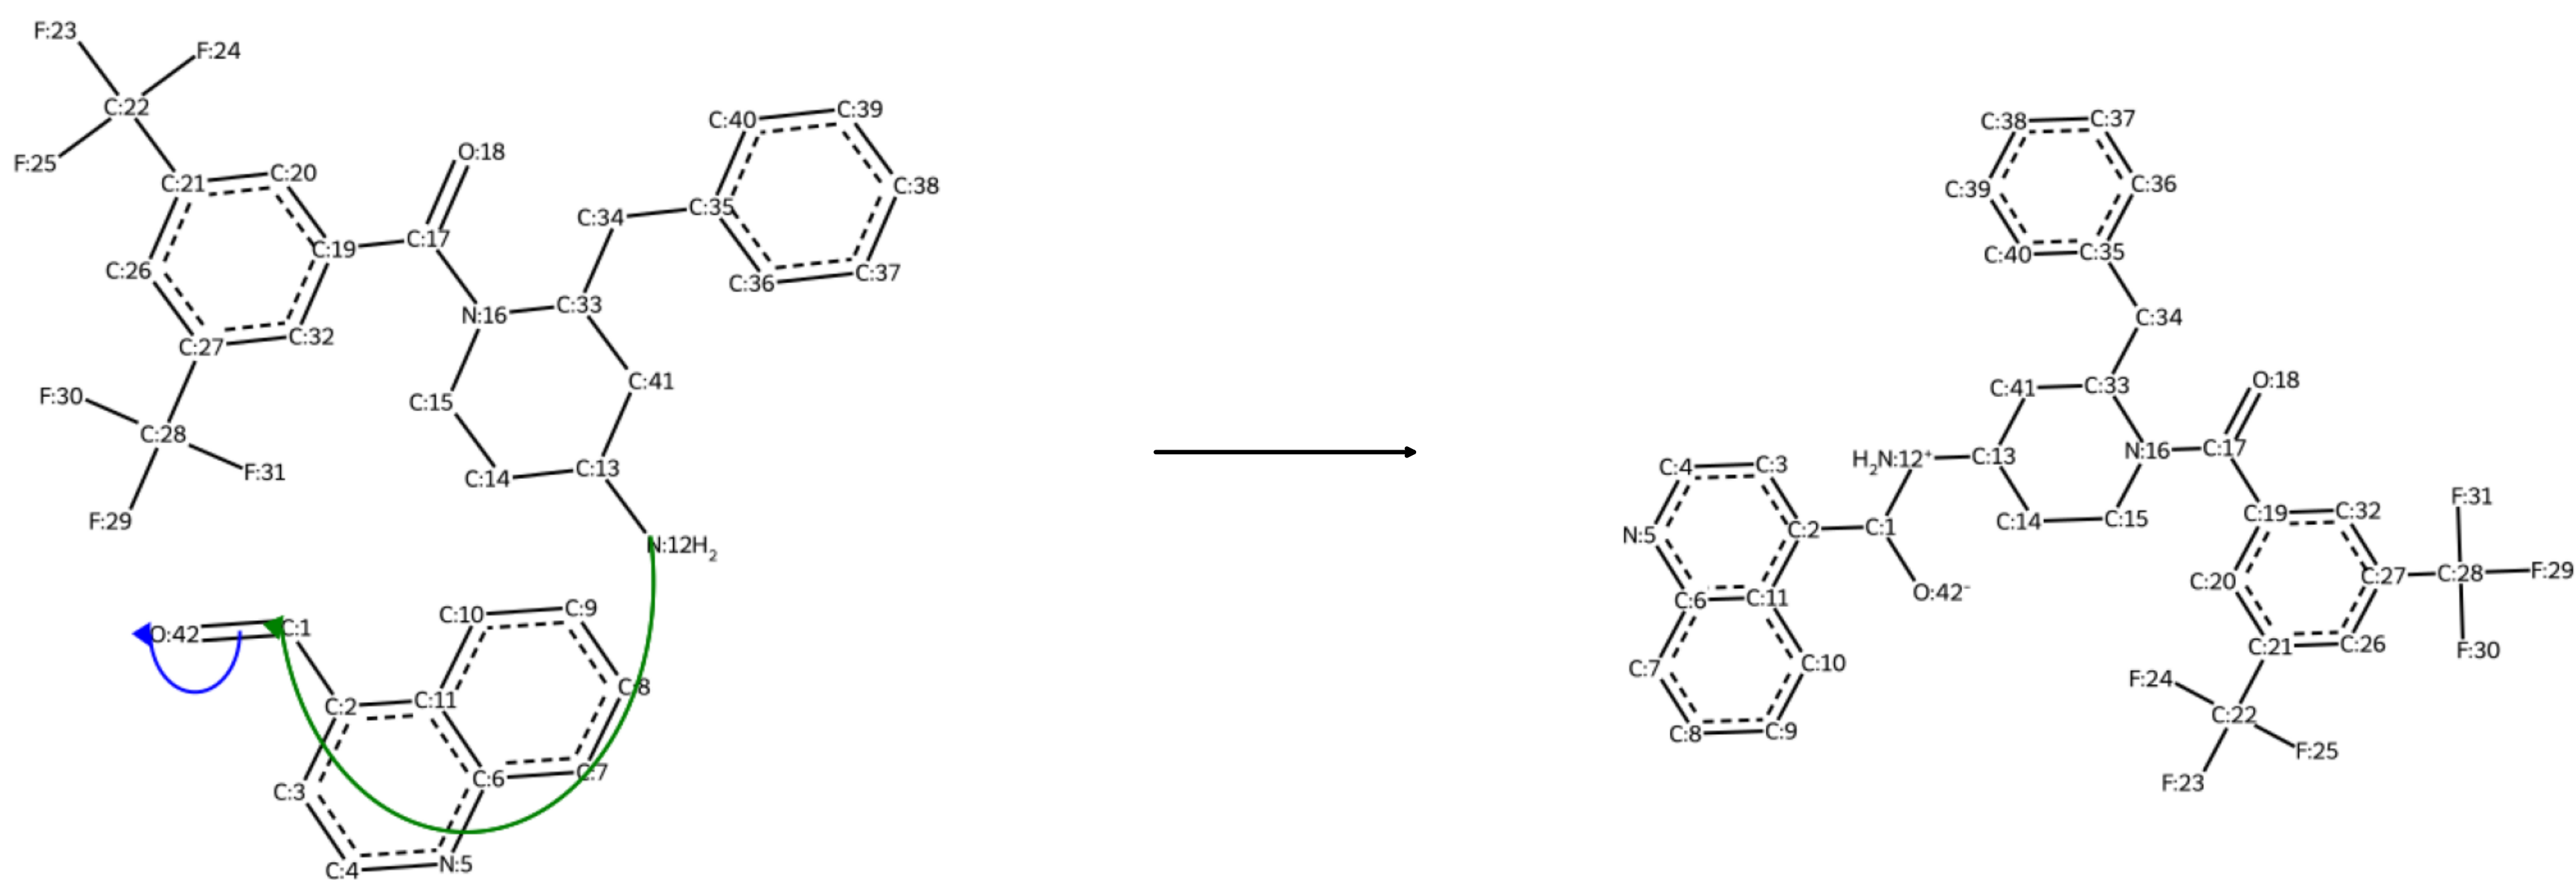



# Original reaction RXN\_ID:76

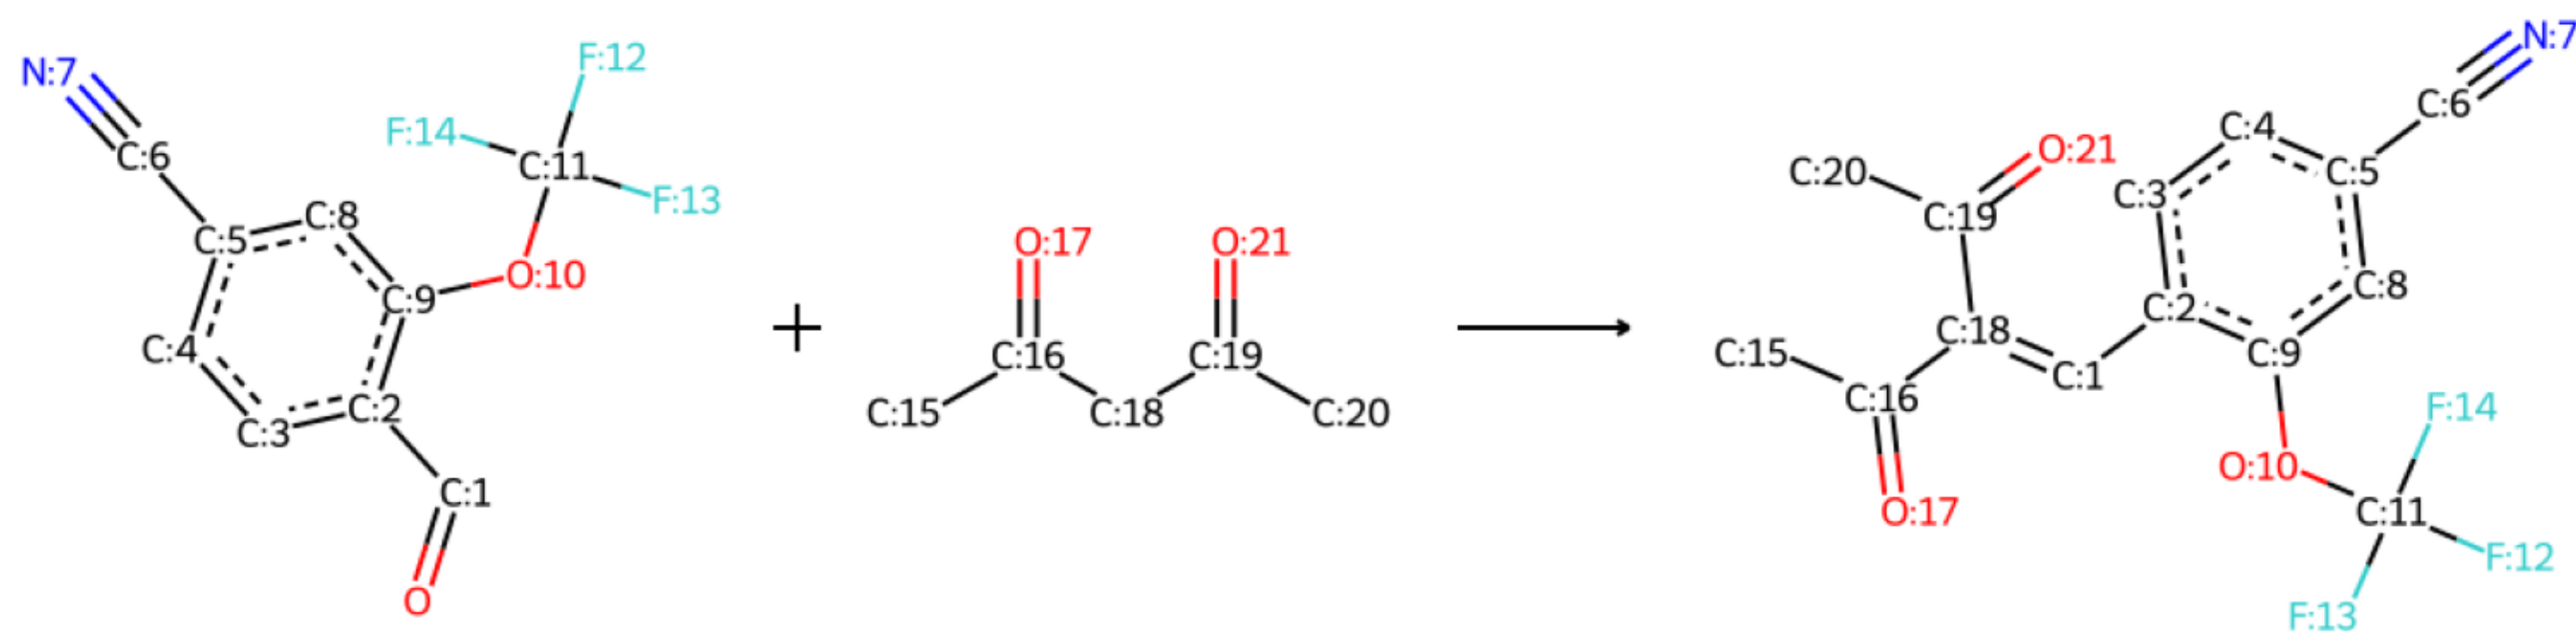

## ELECTRO-generated mechanistic pathway

[Arrow order: (1) green, (2) blue, (3) red, (4) orange]

step #1

Product(s)

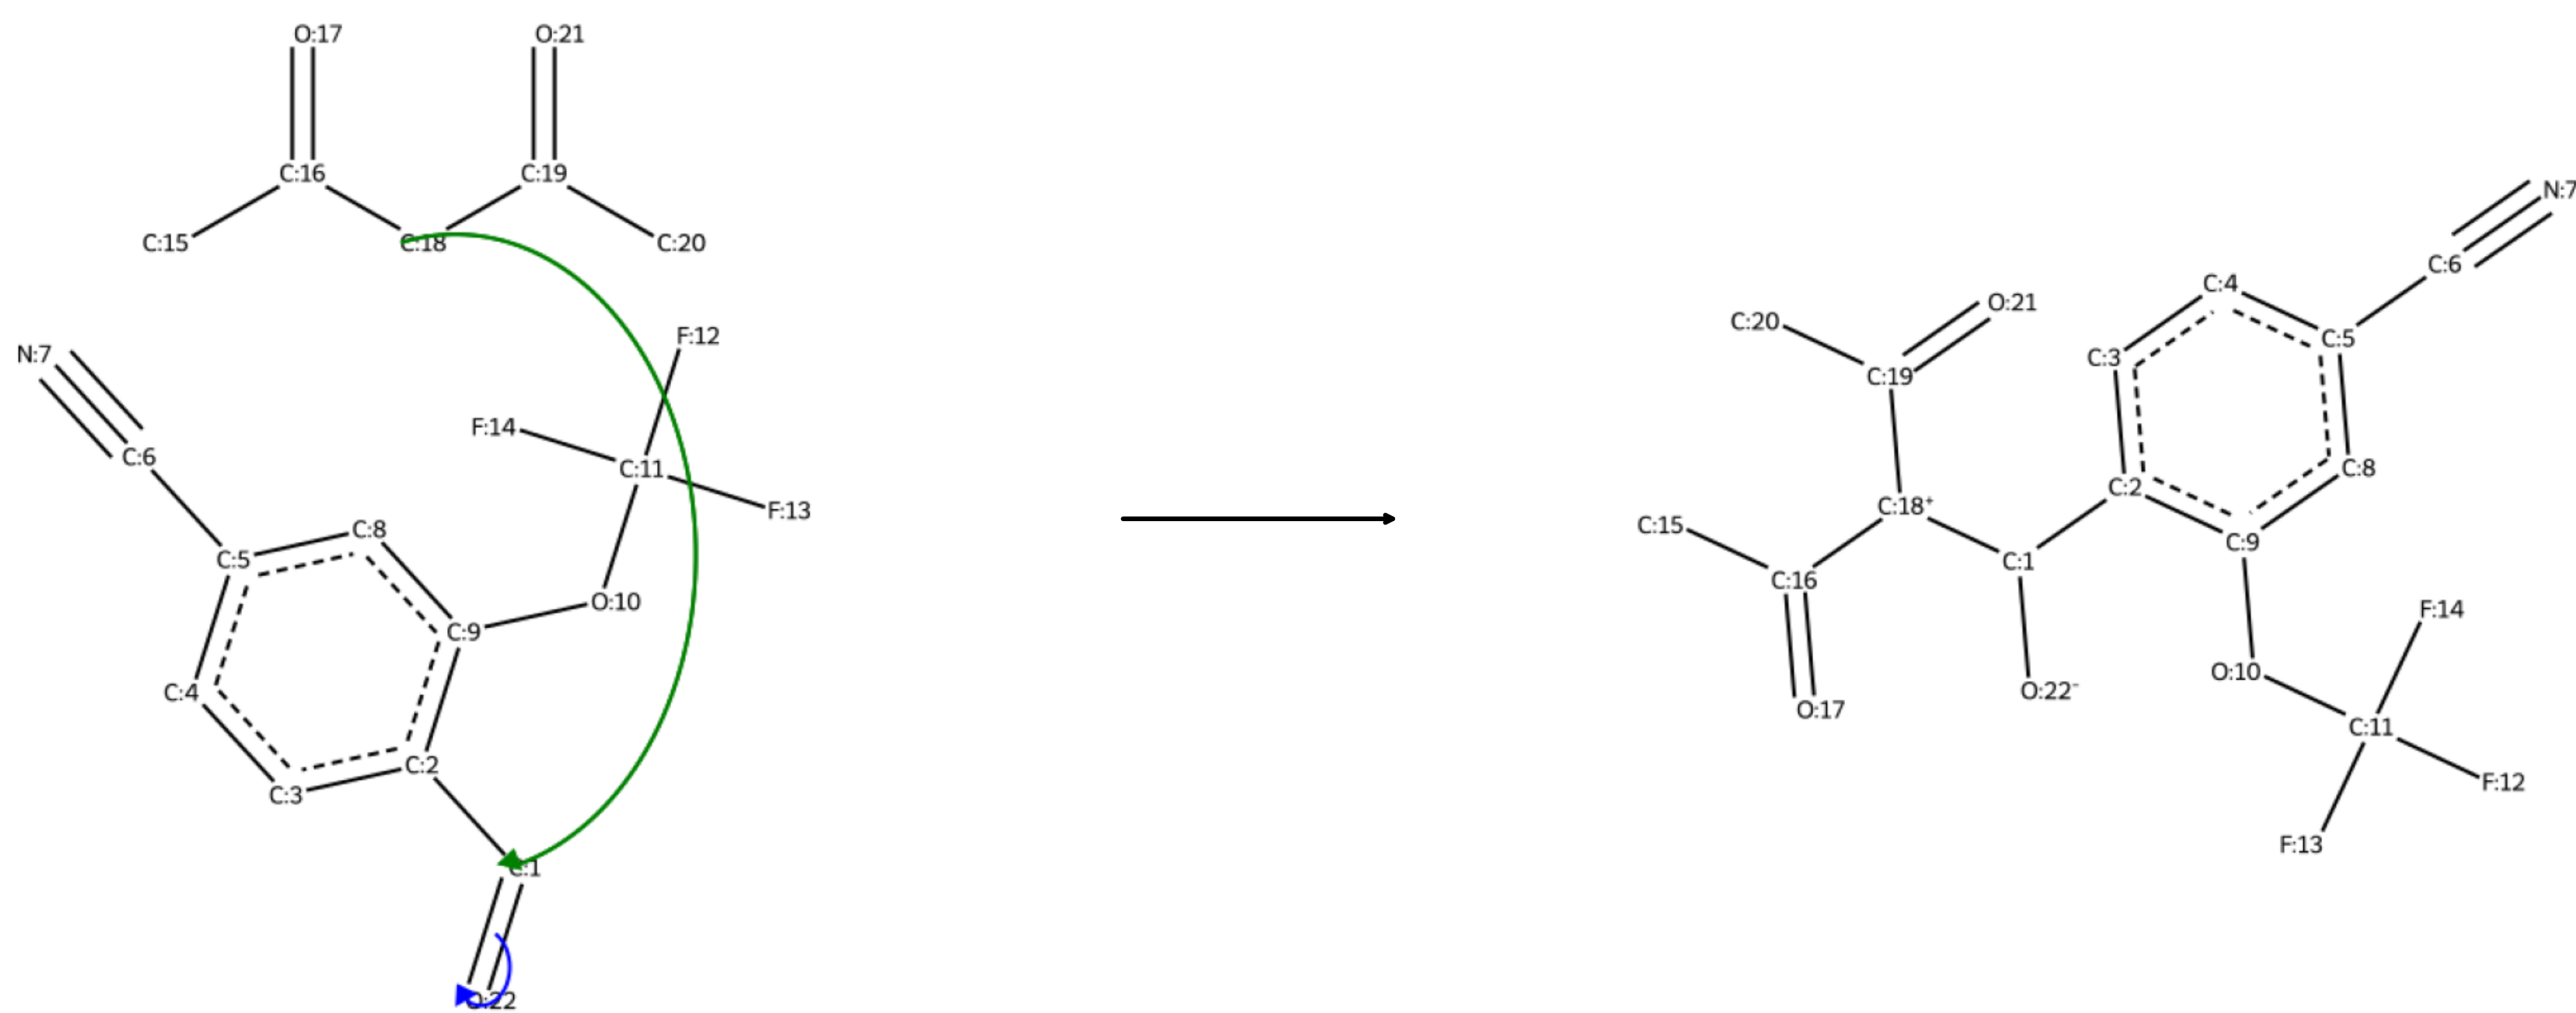

# Original reaction RXN\_ID:77

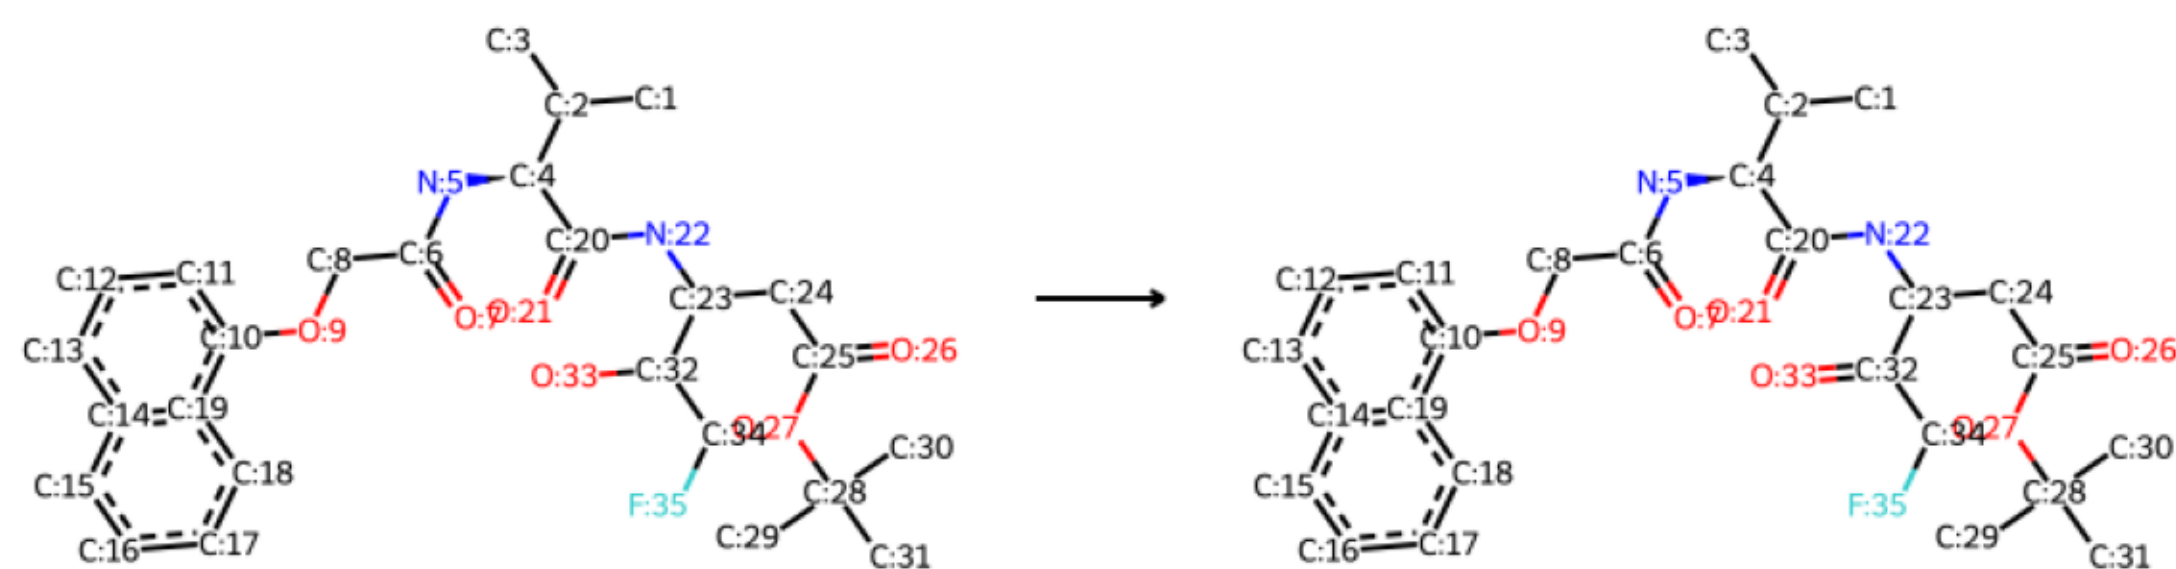

## ELECTRO-generated mechanistic pathway

[Arrow order: (1) green, (2) blue, (3) red, (4) orange]

step #1

Product(s)

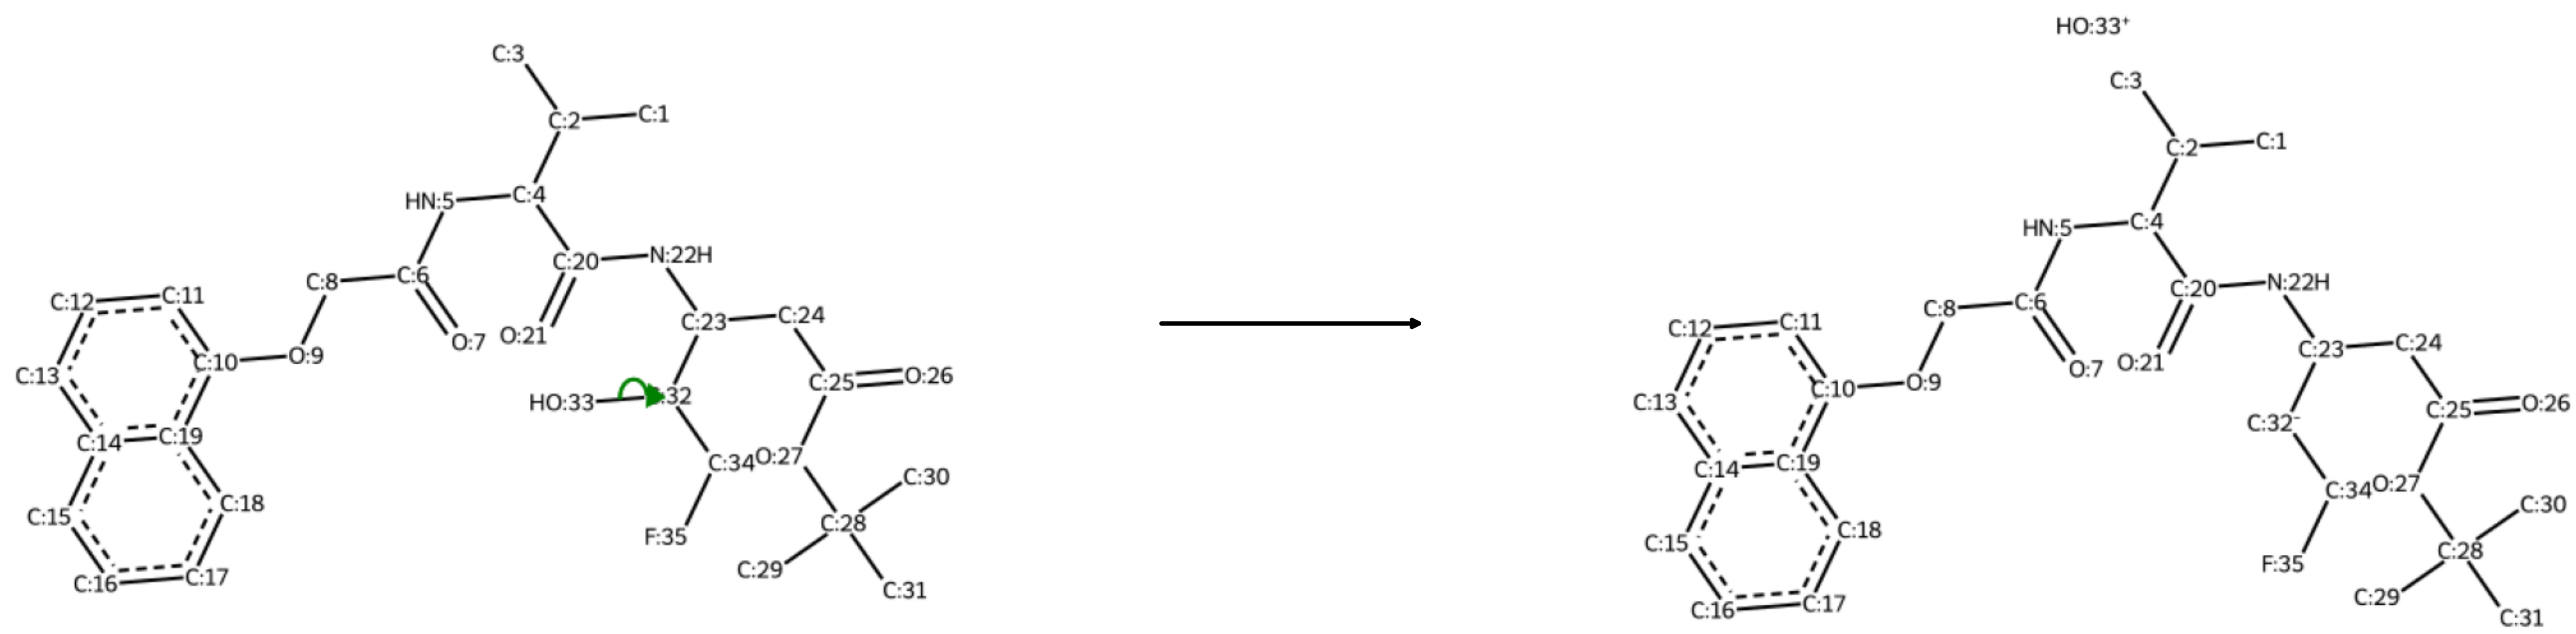



# Original reaction RXN\_ID:78

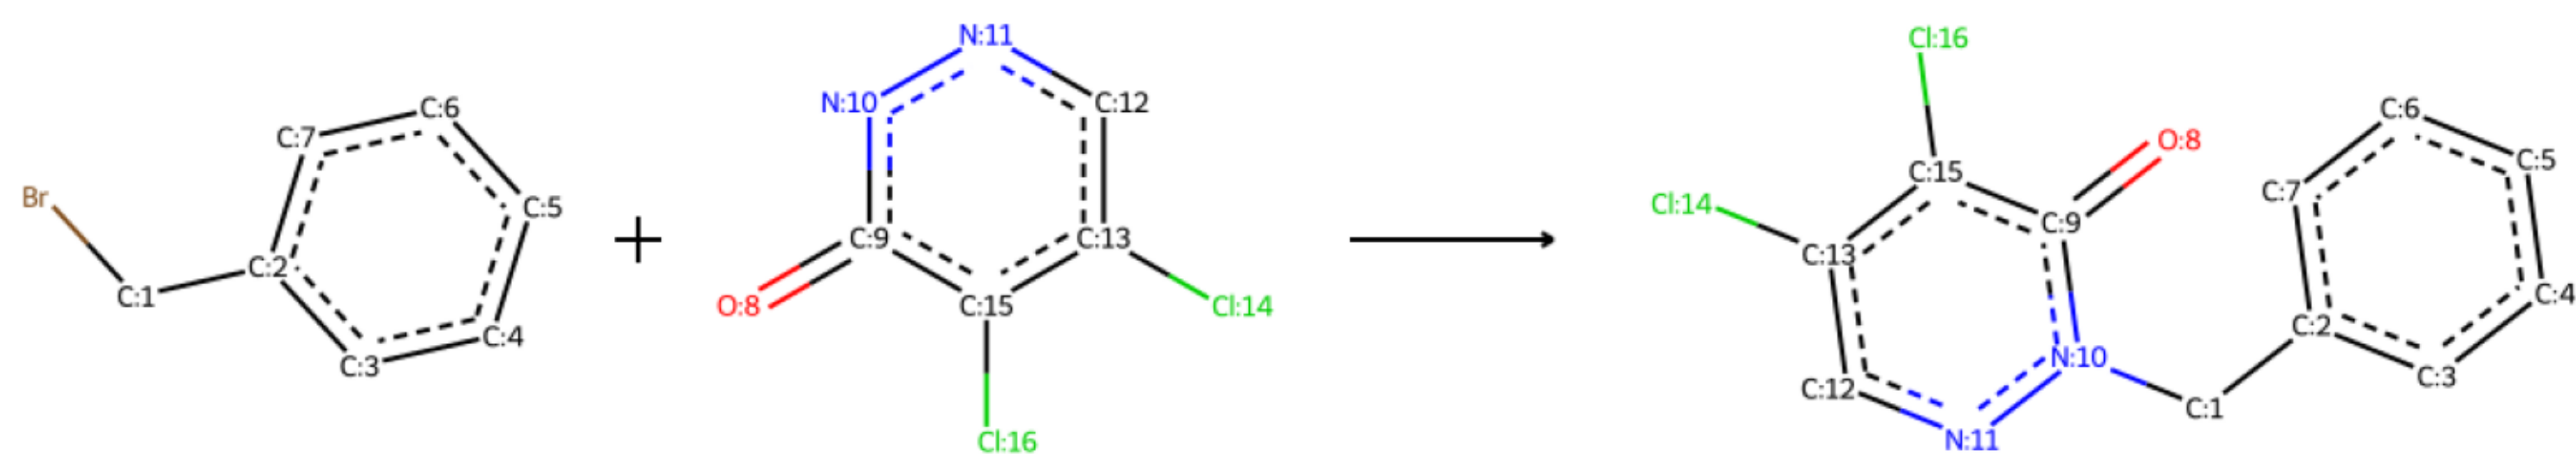

## ELECTRO-generated mechanistic pathway

[Arrow order: (1) green, (2) blue, (3) red, (4) orange]

step #1

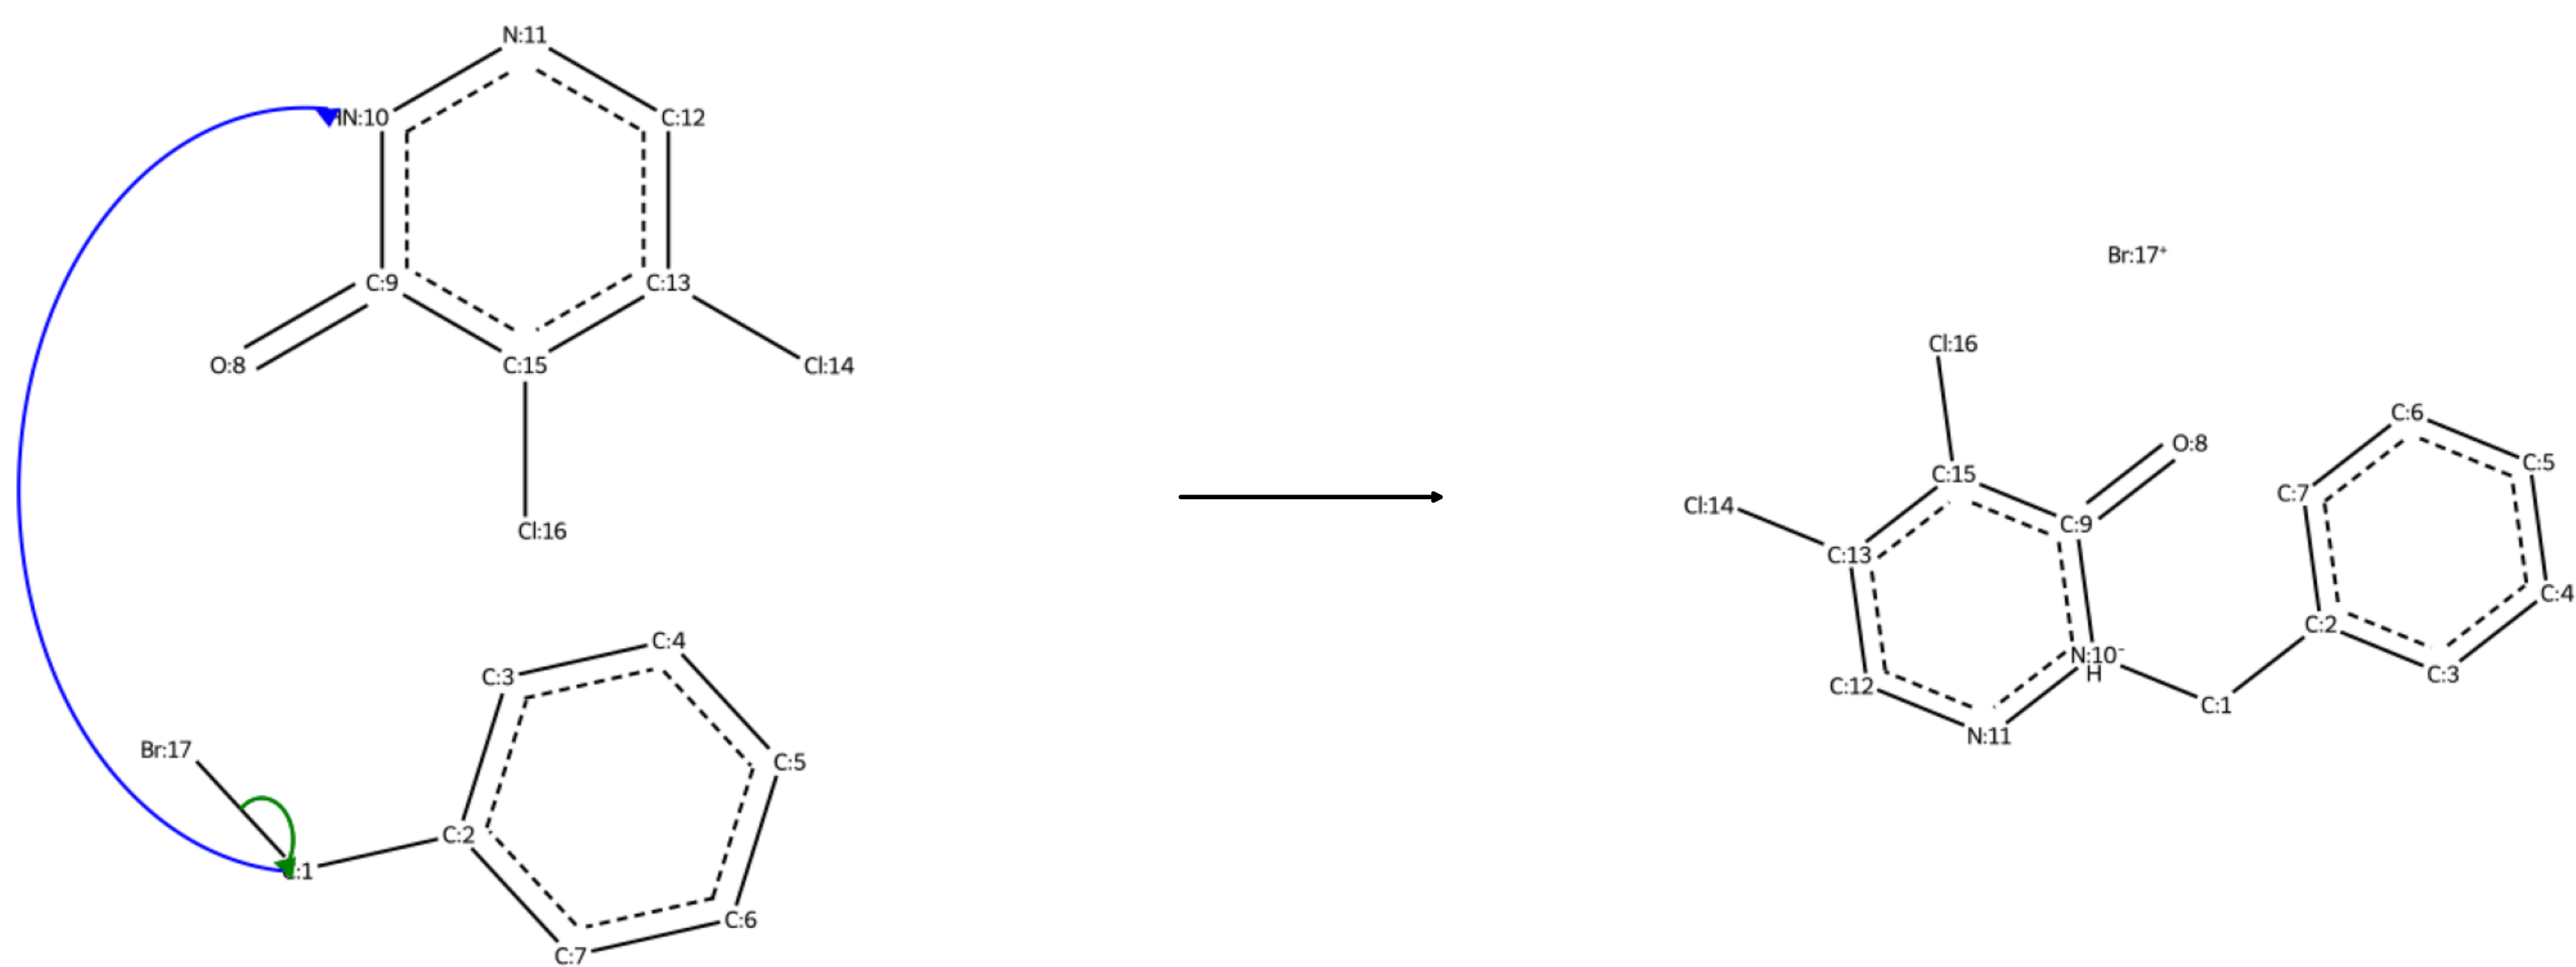

# Original reaction RXN\_ID:79

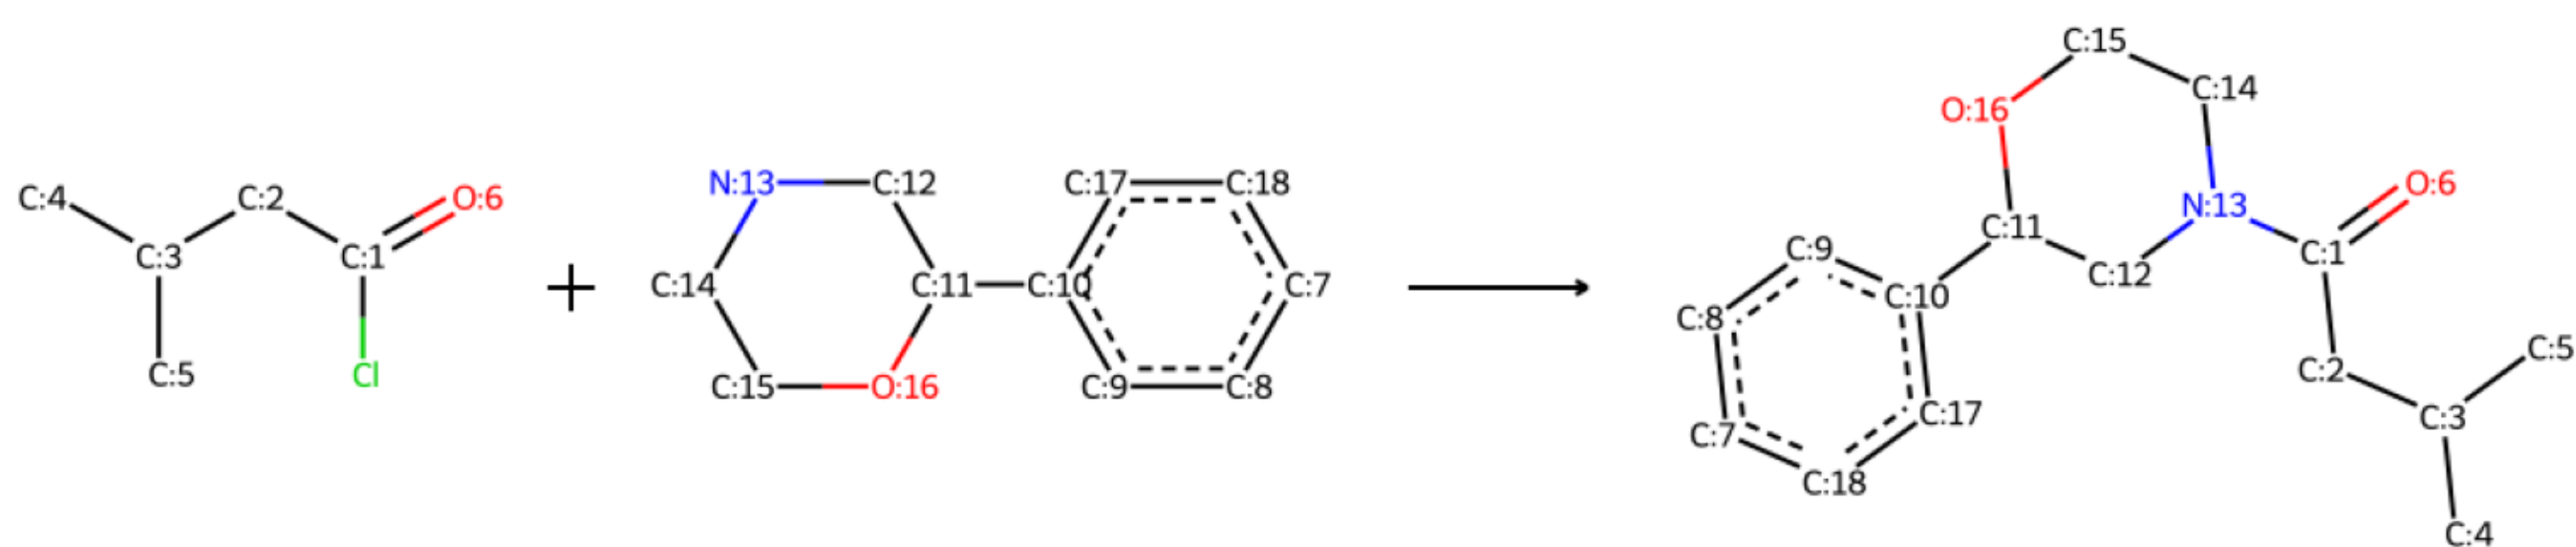

## ELECTRO-generated mechanistic pathway

[Arrow order: (1) green, (2) blue, (3) red, (4) orange]

step #1

Product(s)

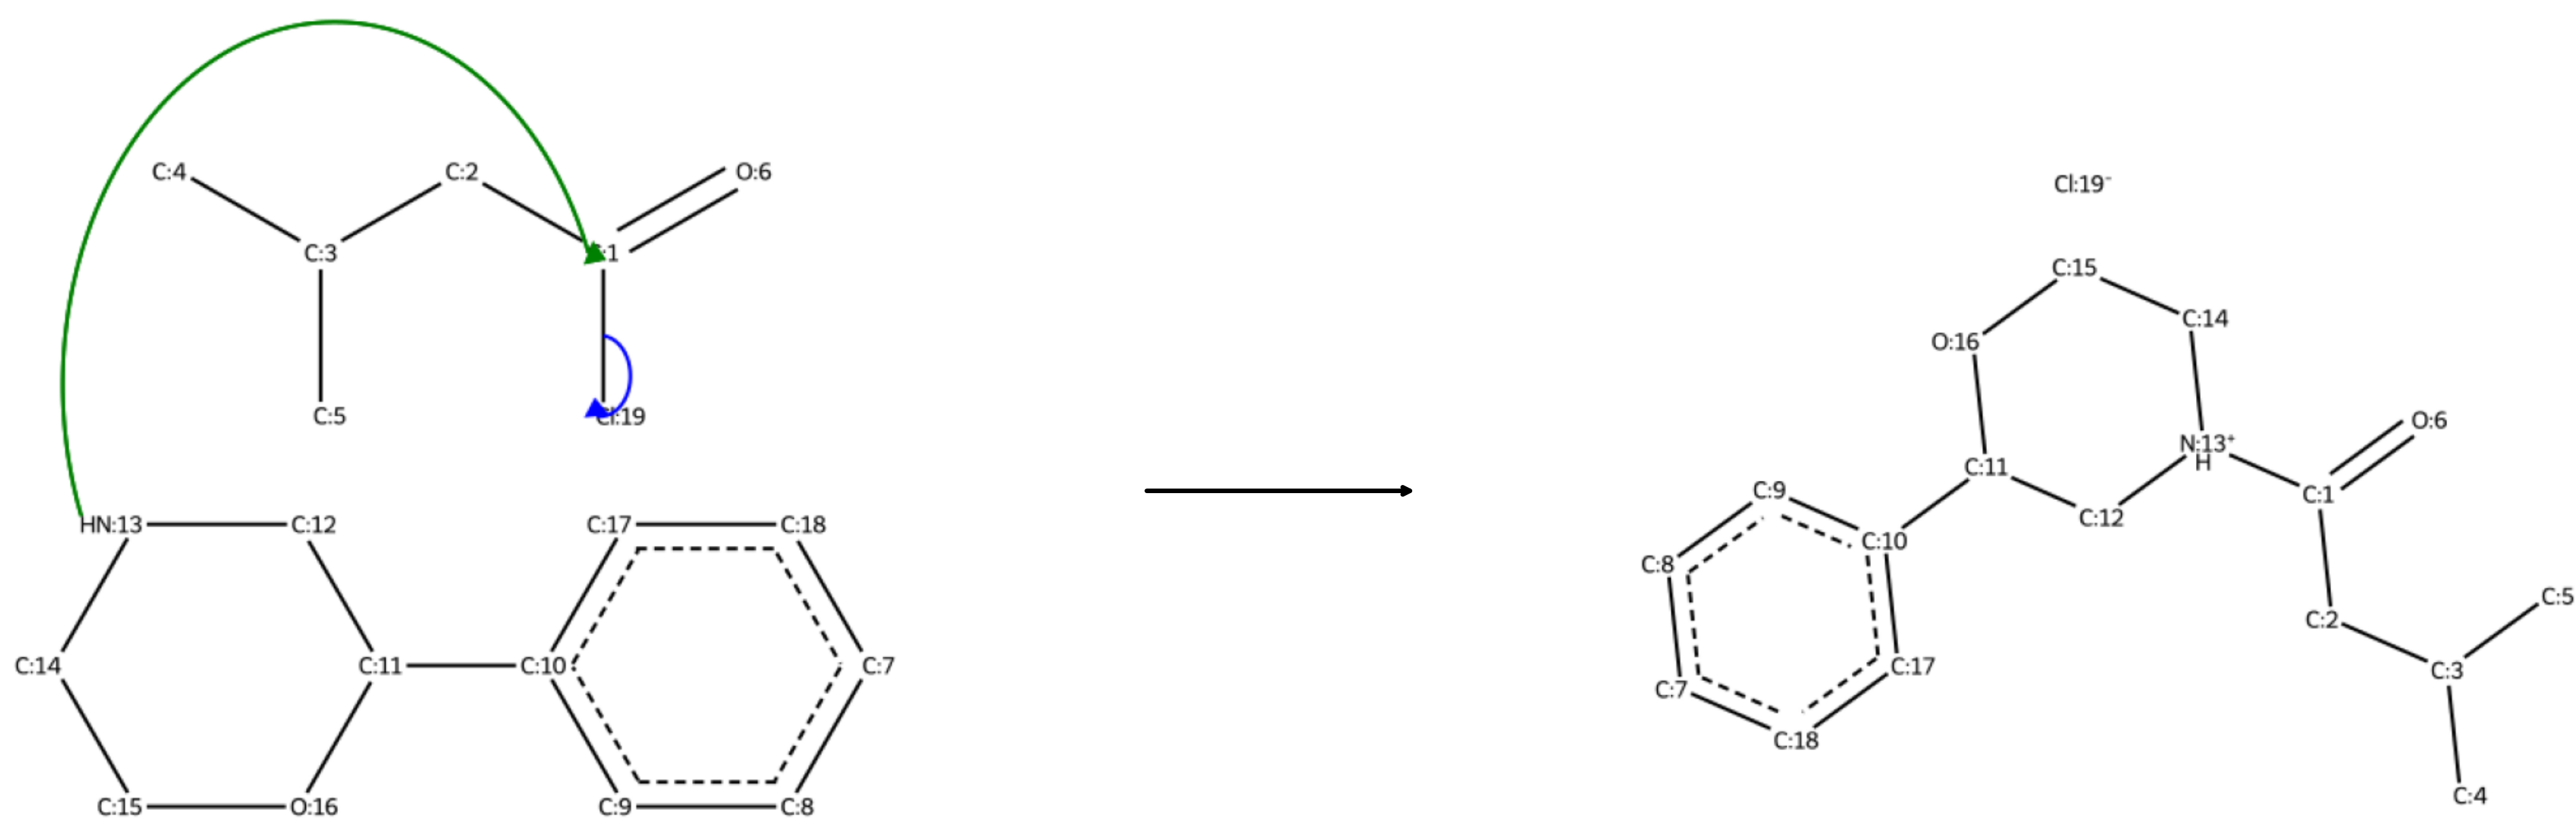



# Original reaction RXN\_ID:80

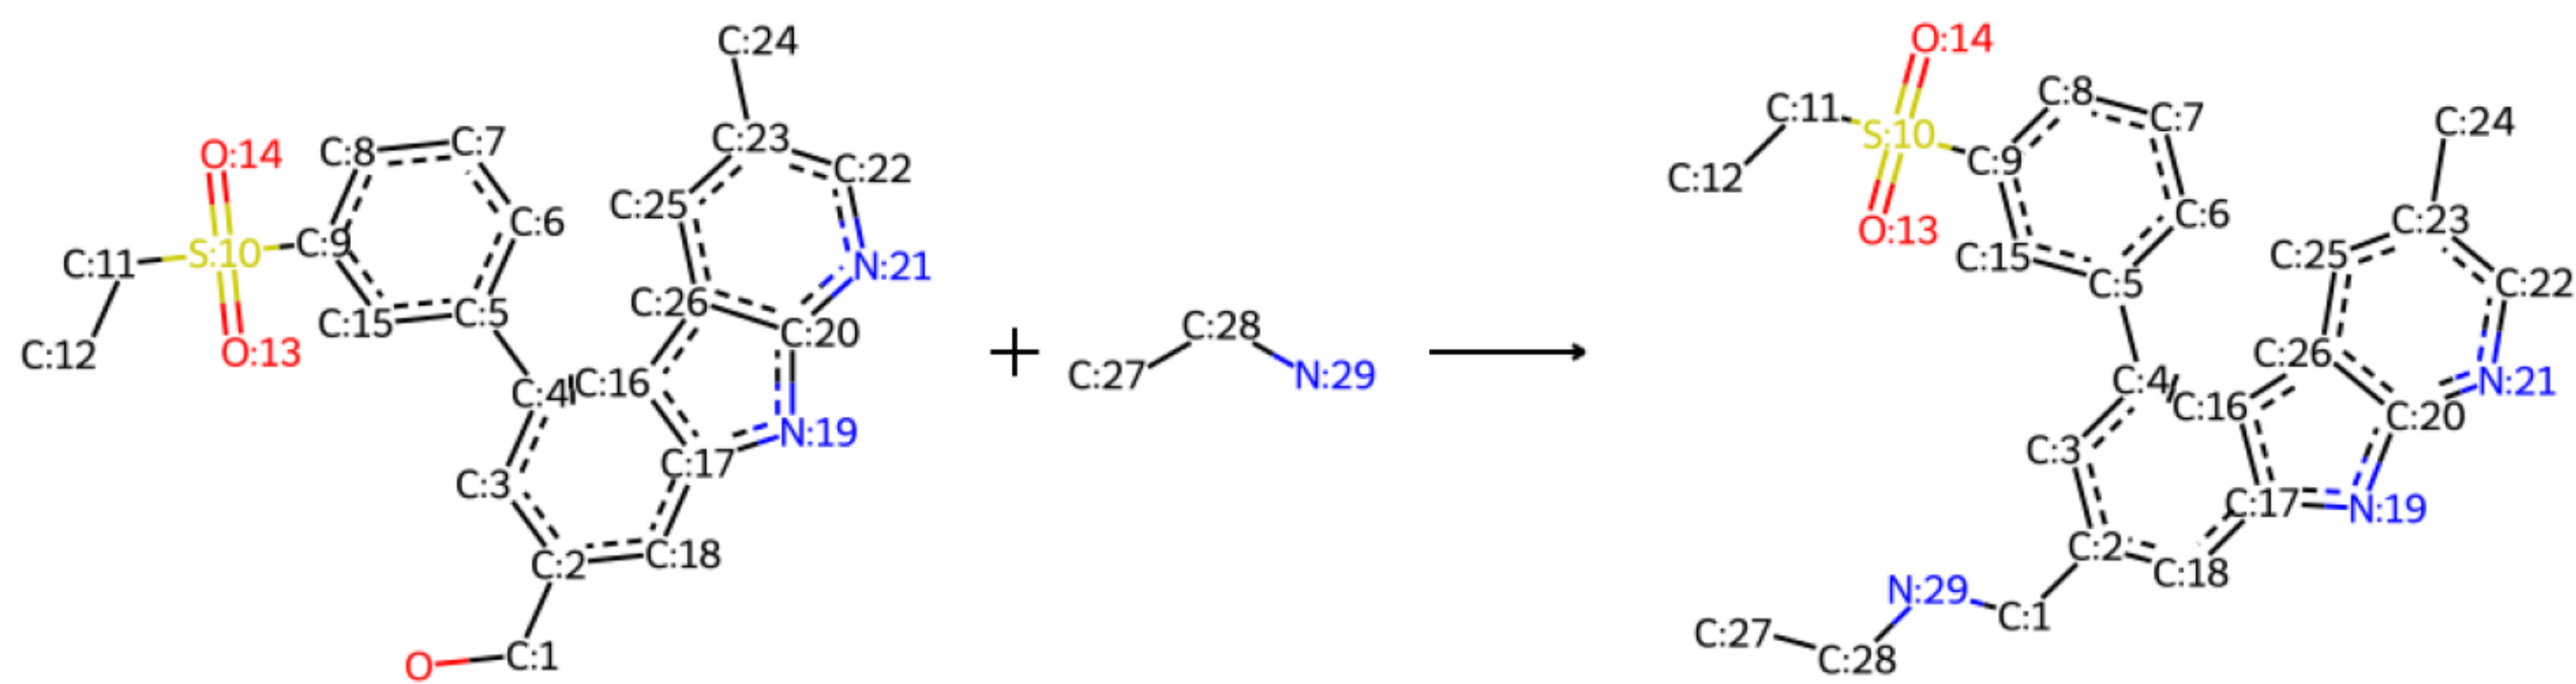

## ELECTRO-generated mechanistic pathway

[Arrow order: (1) green, (2) blue, (3) red, (4) orange]

step #1

Product(s)

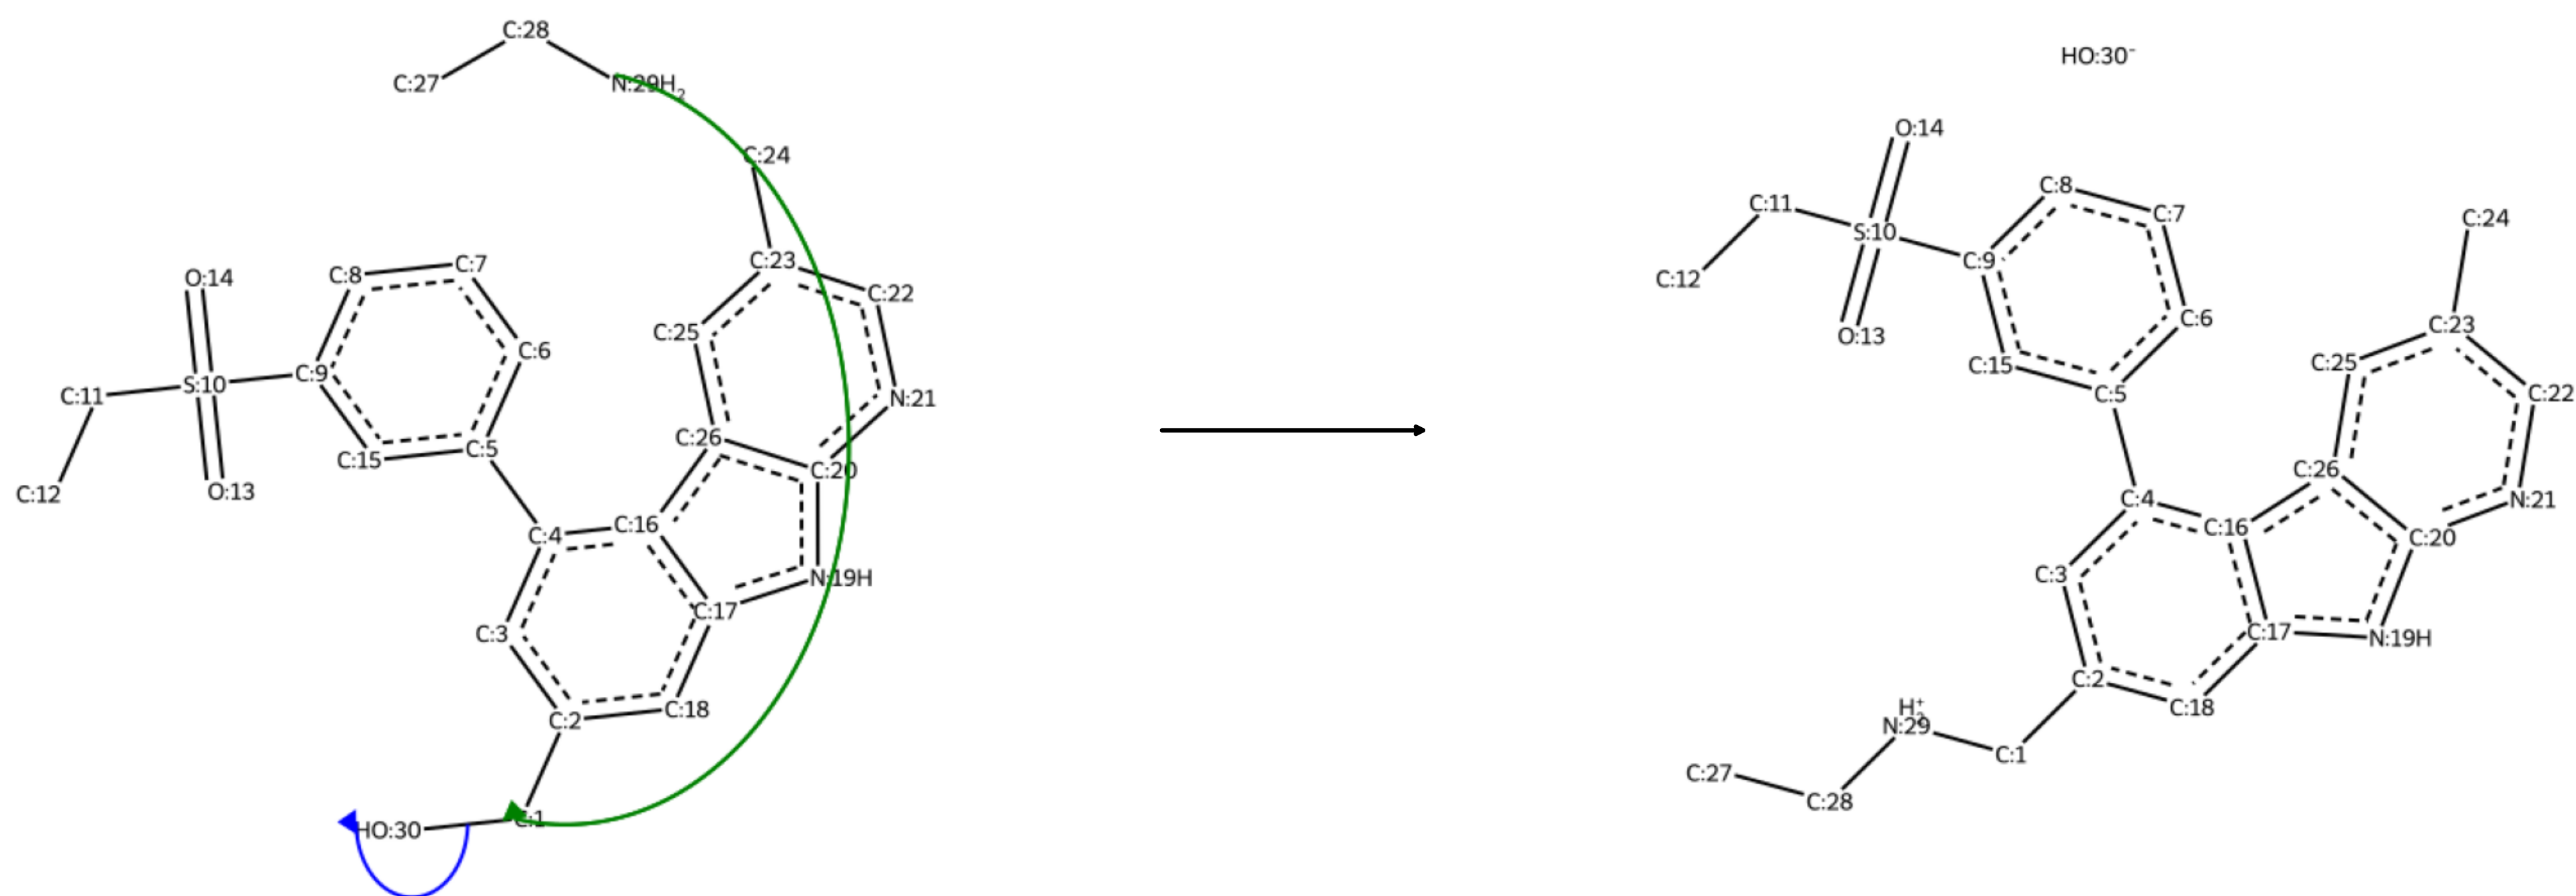

# Original reaction RXN\_ID:81

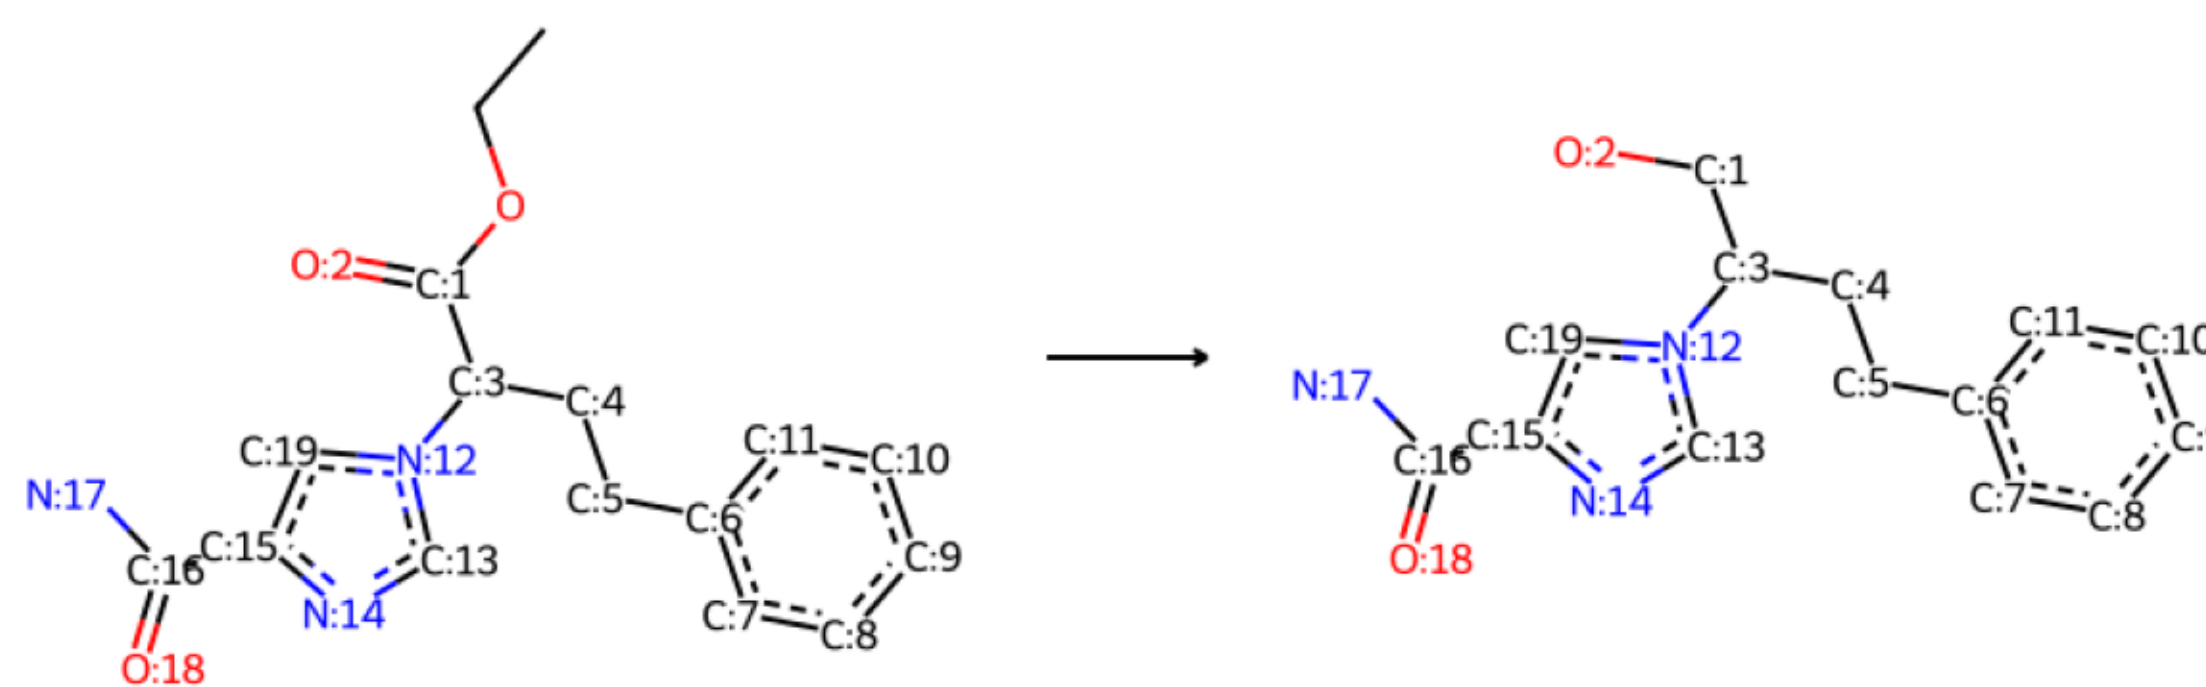

## ELECTRO-generated mechanistic pathway

[Arrow order: (1) green, (2) blue, (3) red, (4) orange]

step #1

Product(s)

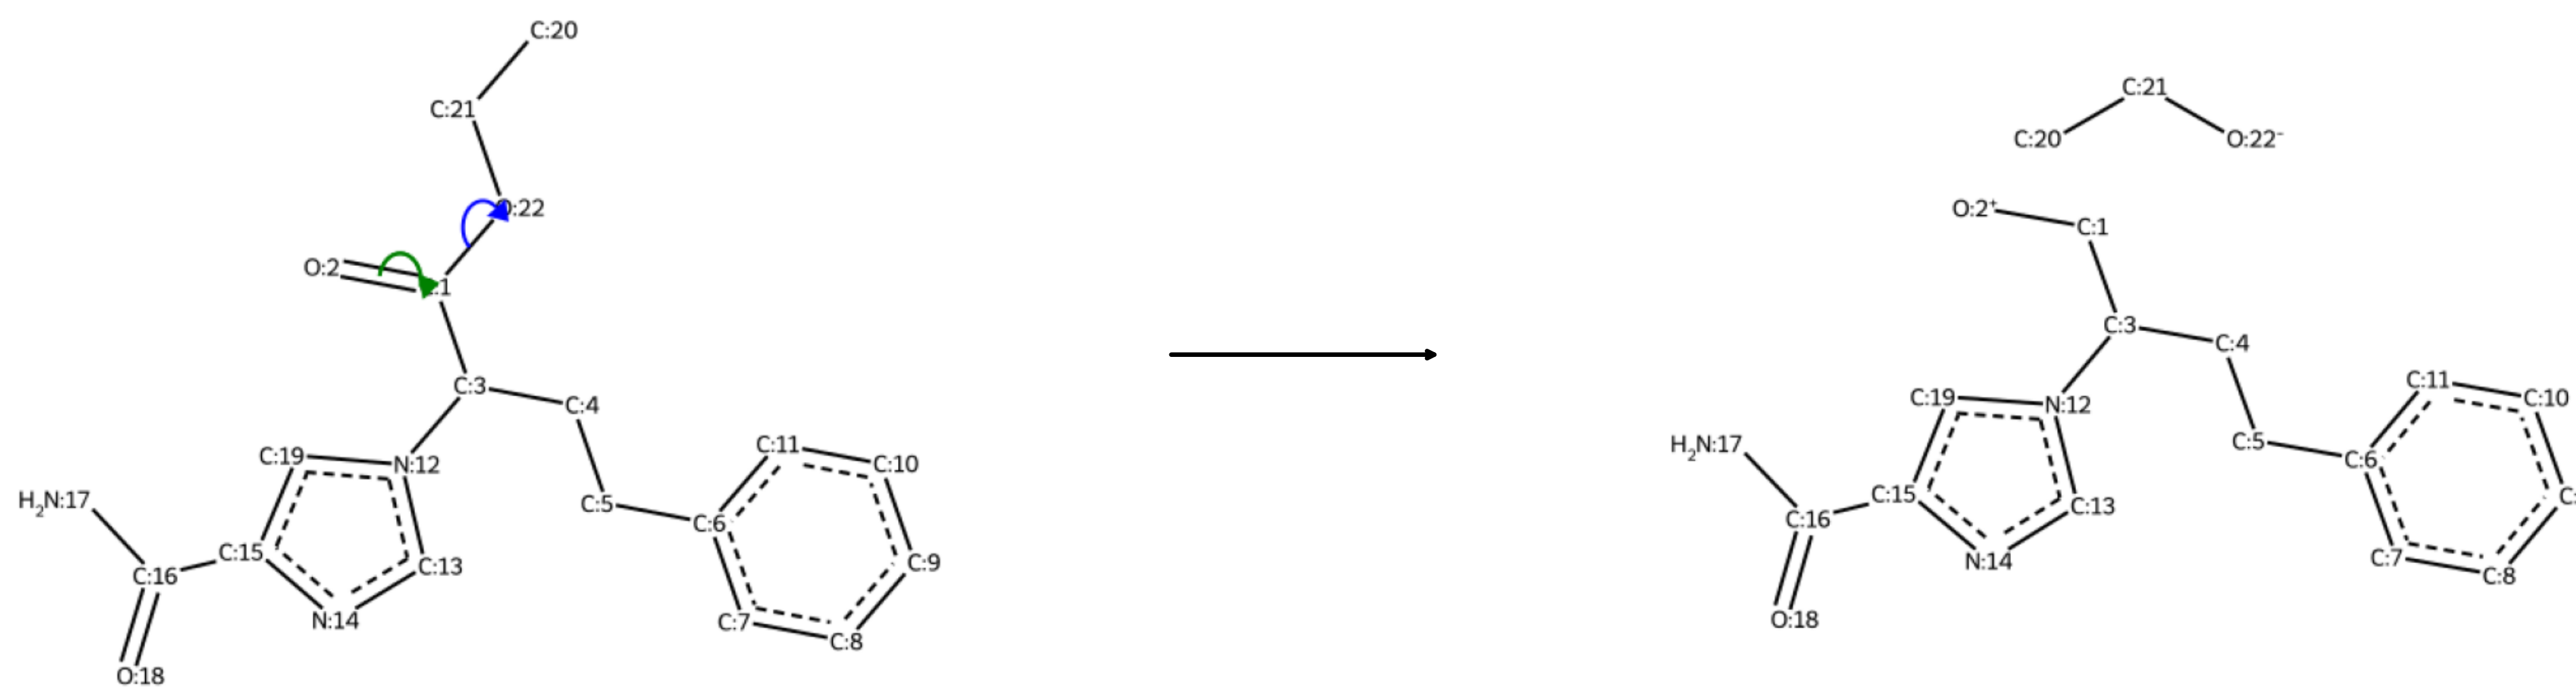



# Original reaction RXN\_ID:82

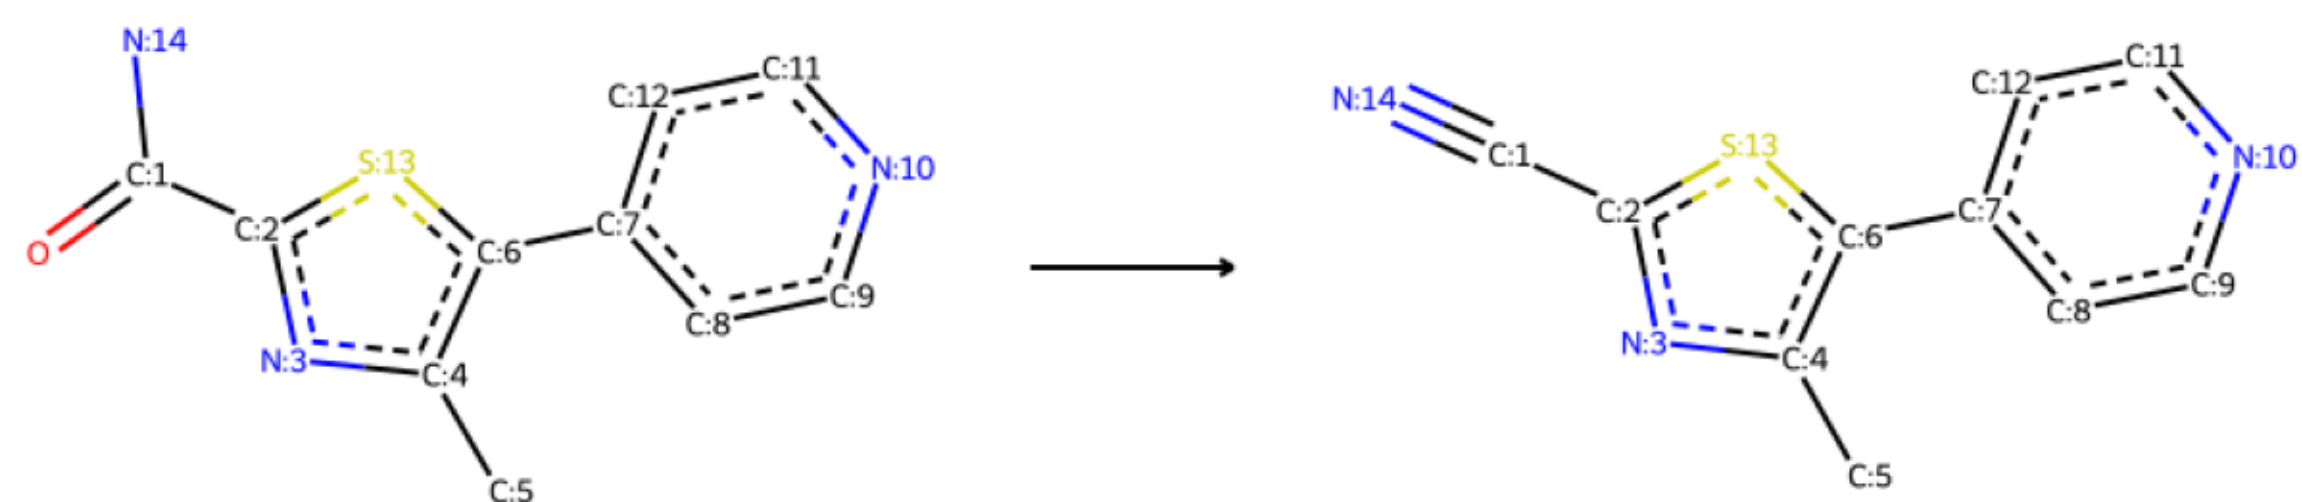

## ELECTRO-generated mechanistic pathway

[Arrow order: (1) green, (2) blue, (3) red, (4) orange]

step #1

**Product(s)**

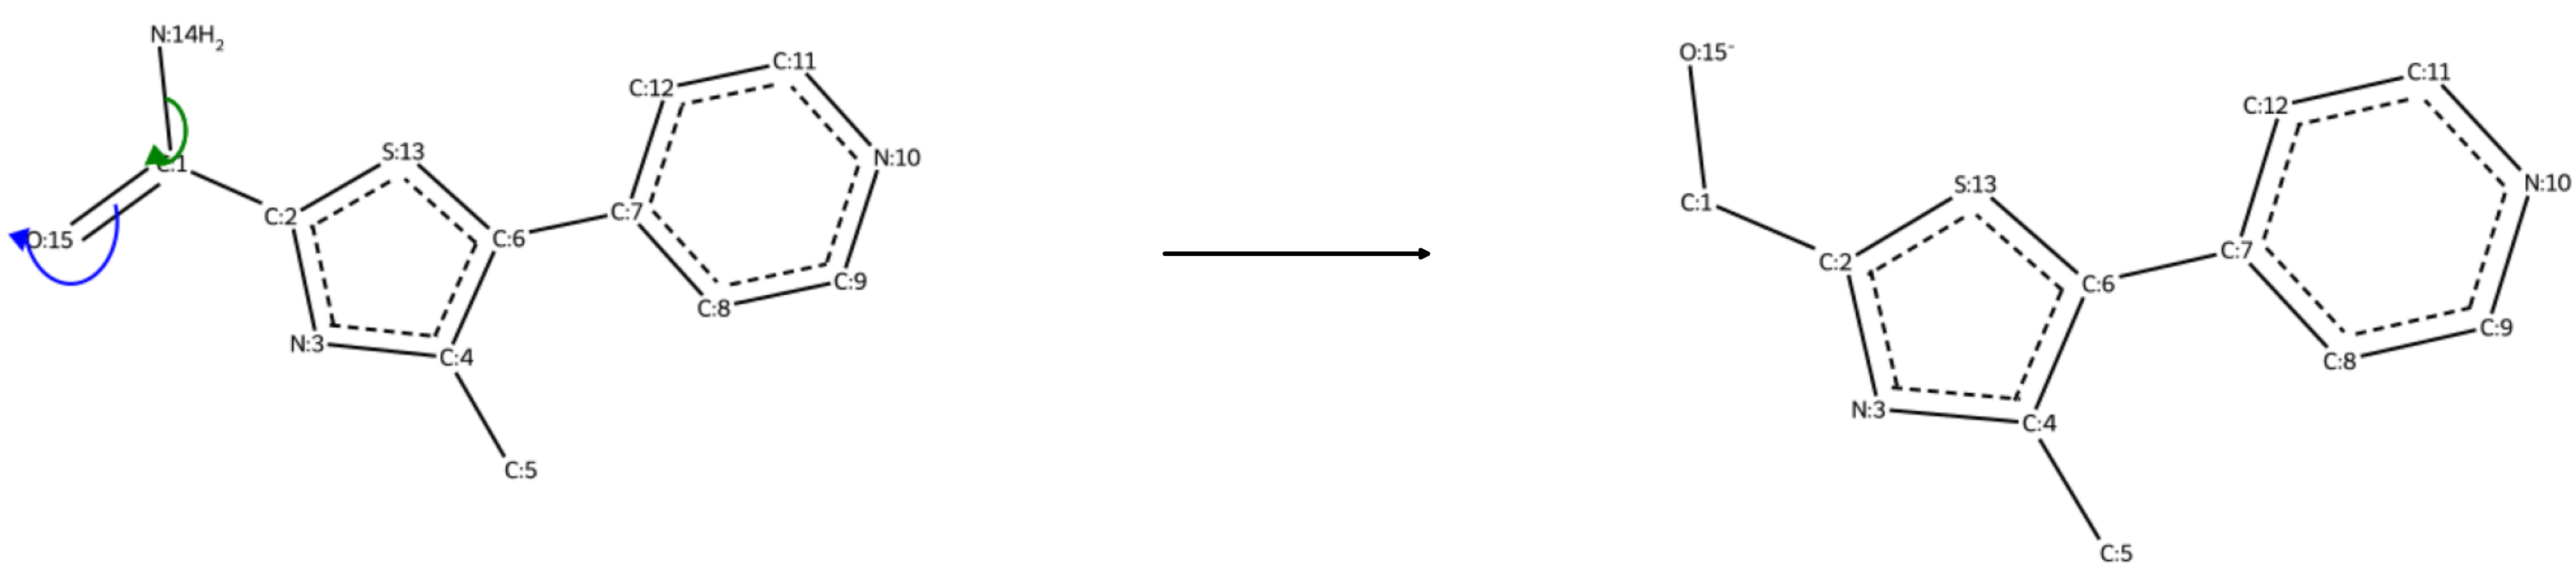

# Original reaction RXN\_ID:83

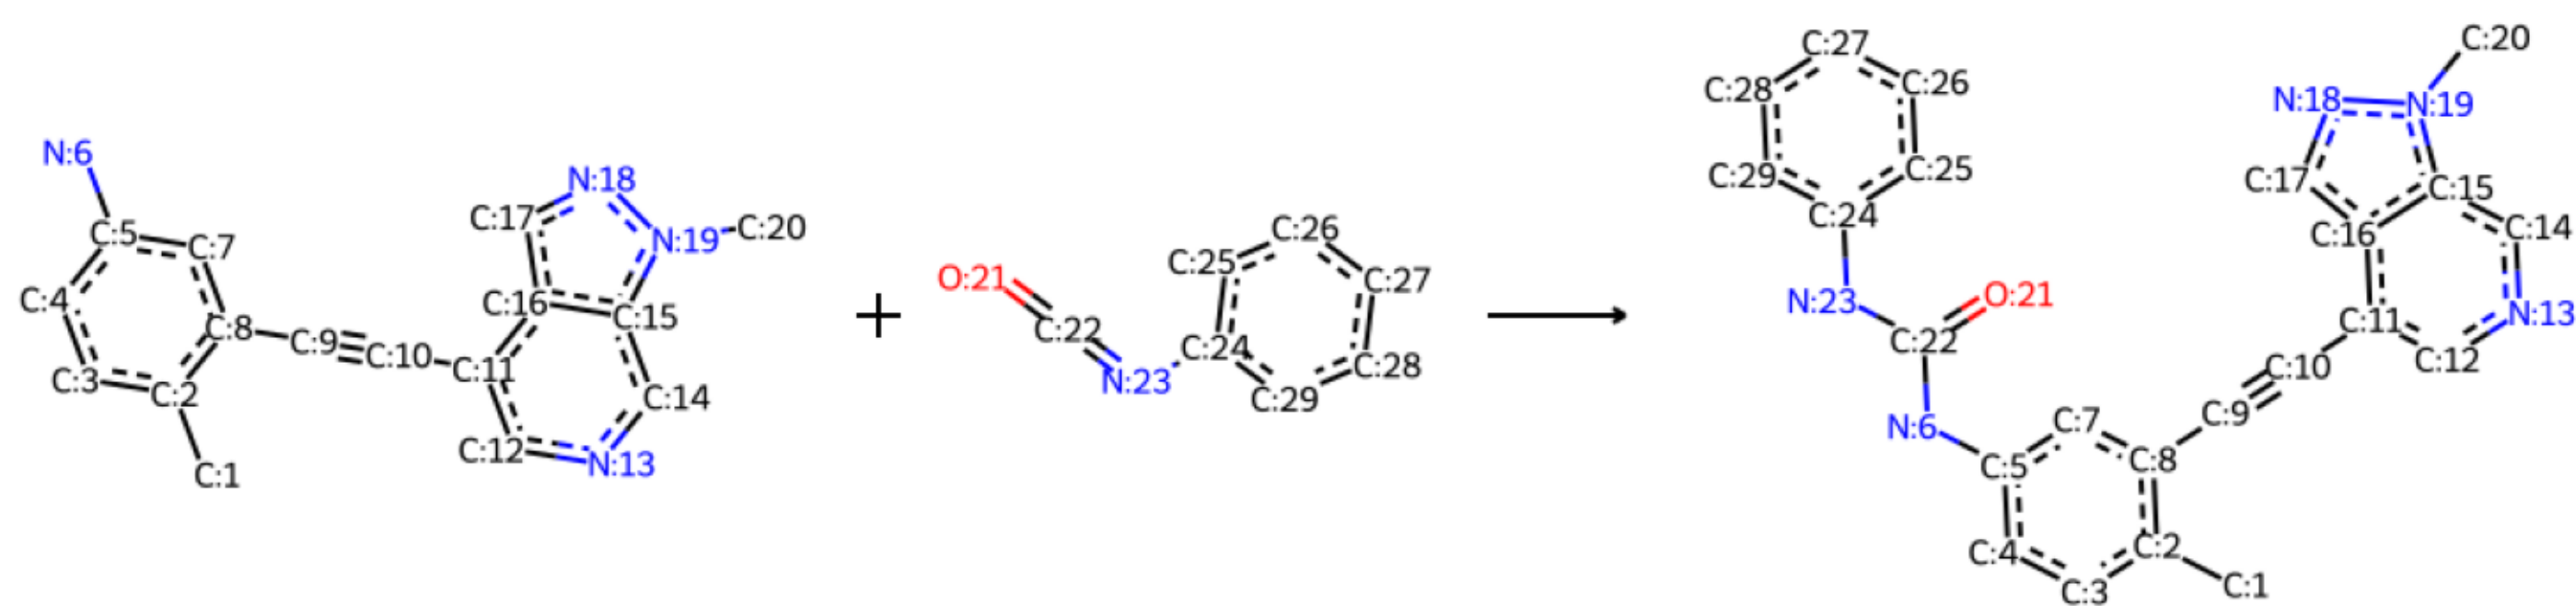

## ELECTRO-generated mechanistic pathway

[Arrow order: (1) green, (2) blue, (3) red, (4) orange]

step #1

Product(s)

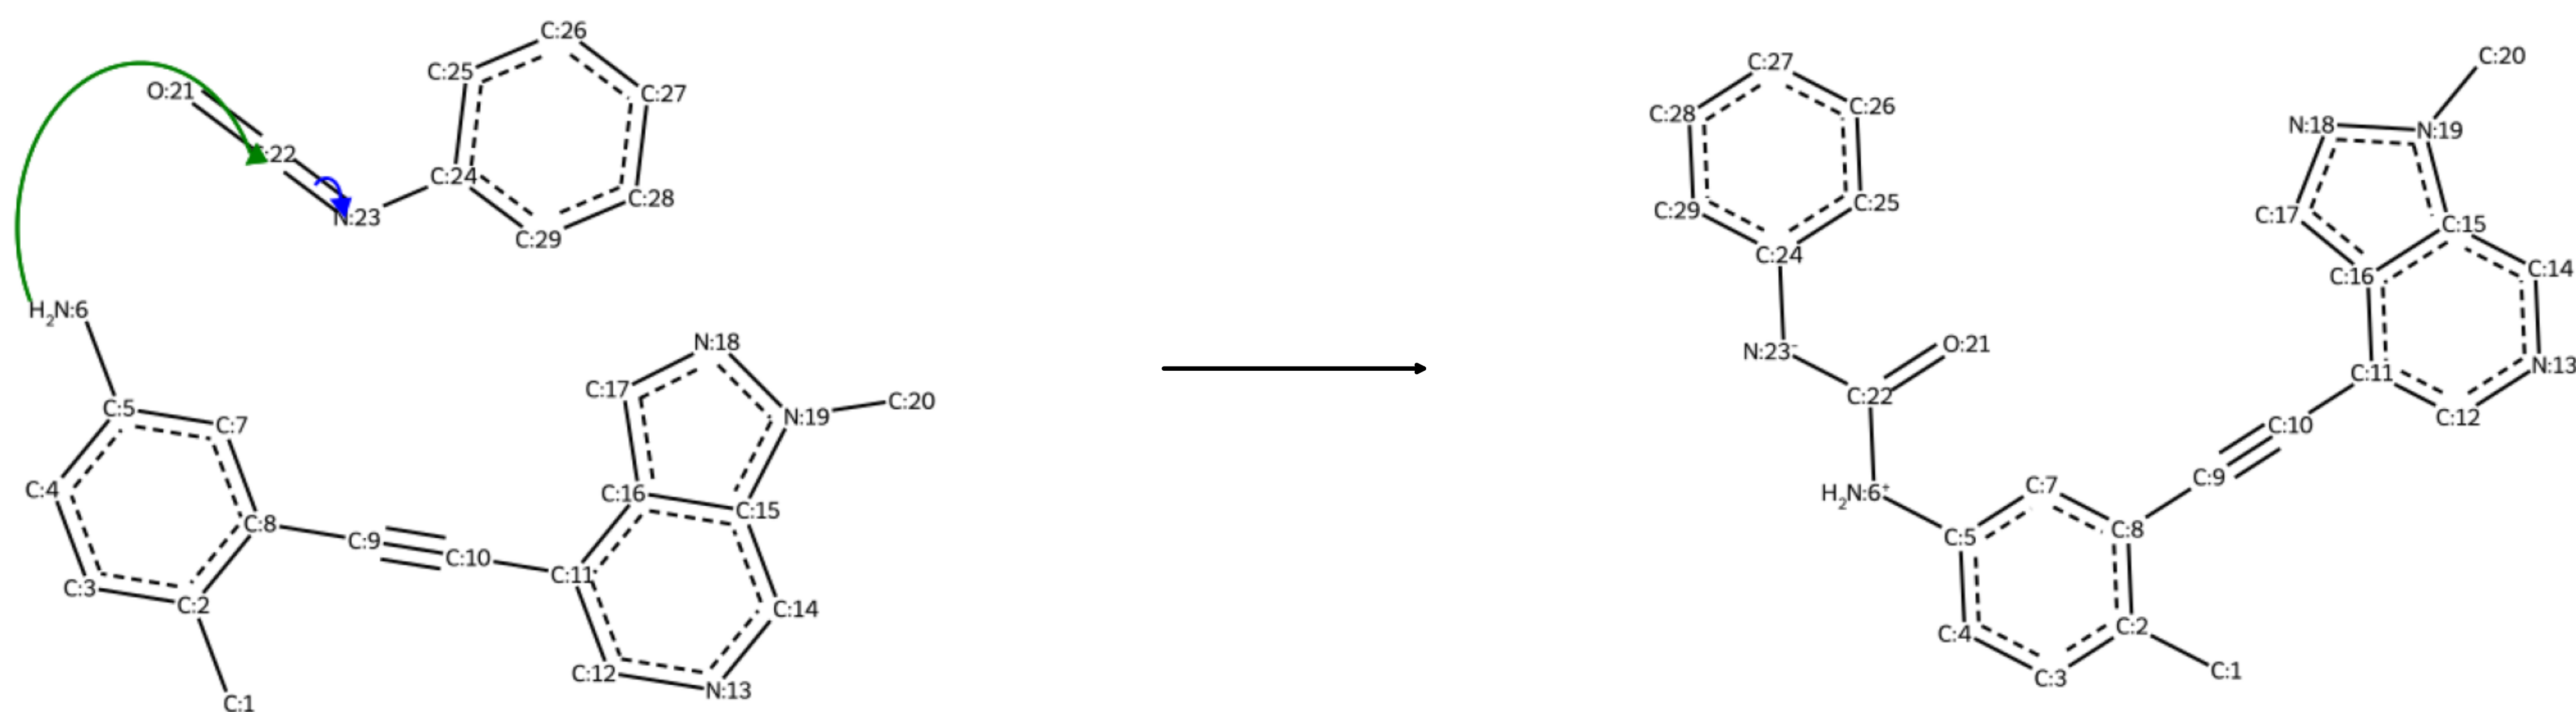



# Original reaction RXN\_ID:84

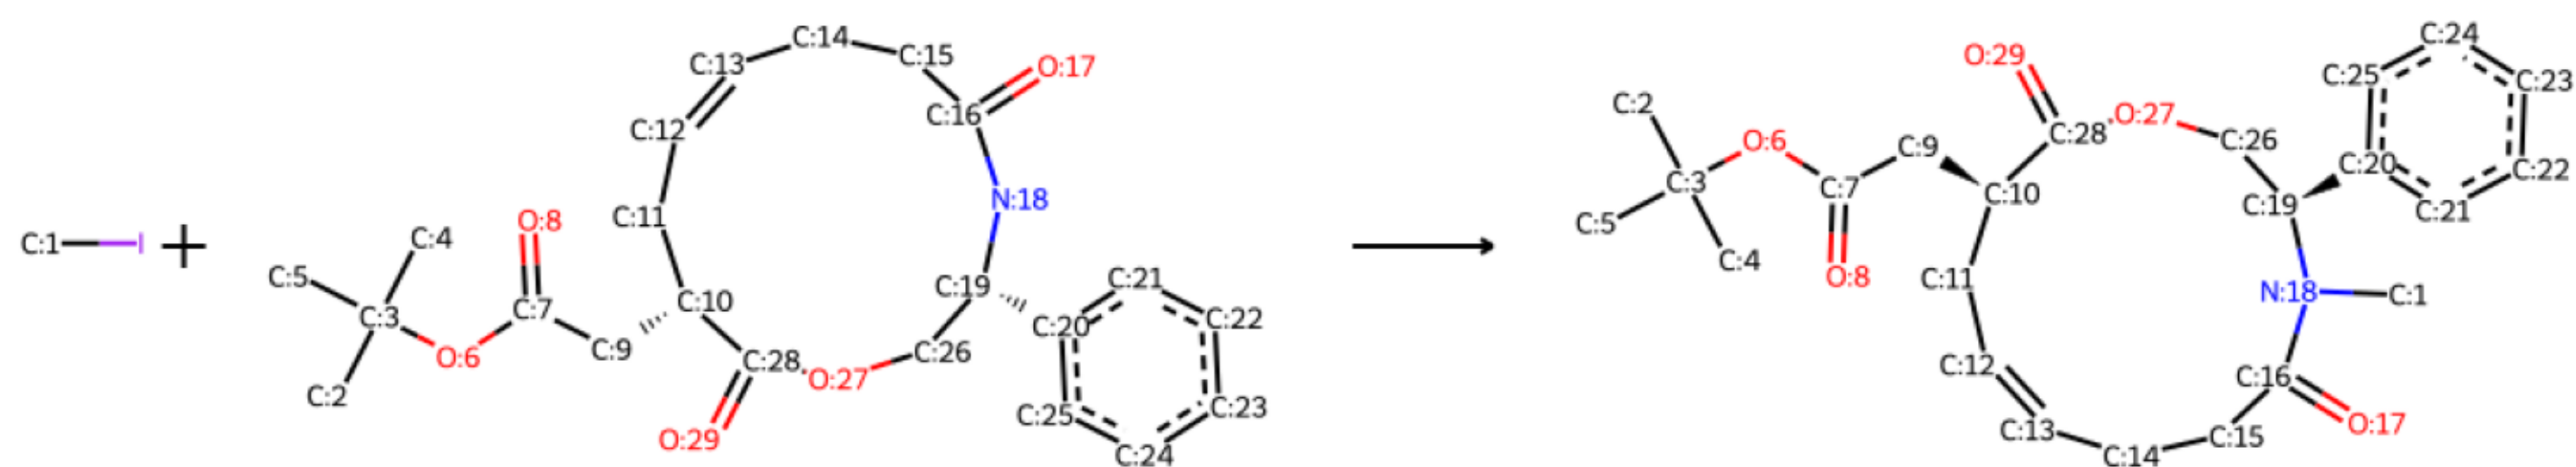

## ELECTRO-generated mechanistic pathway

[Arrow order: (1) green, (2) blue, (3) red, (4) orange]

step #1

Product(s)

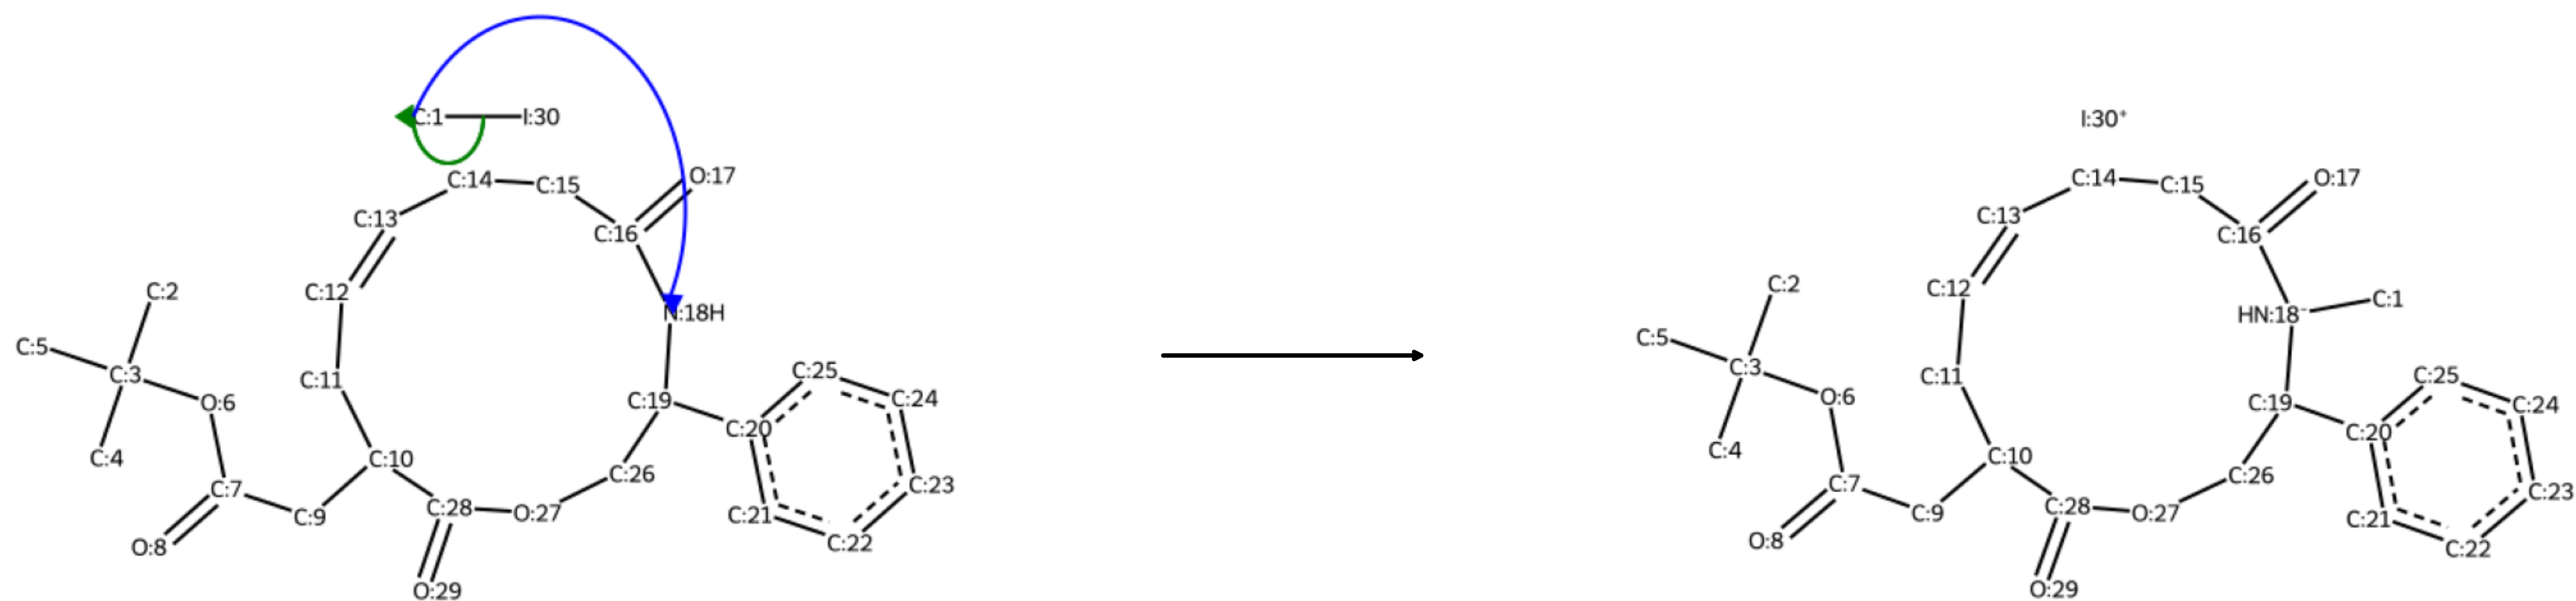

# Original reaction RXN\_ID:85

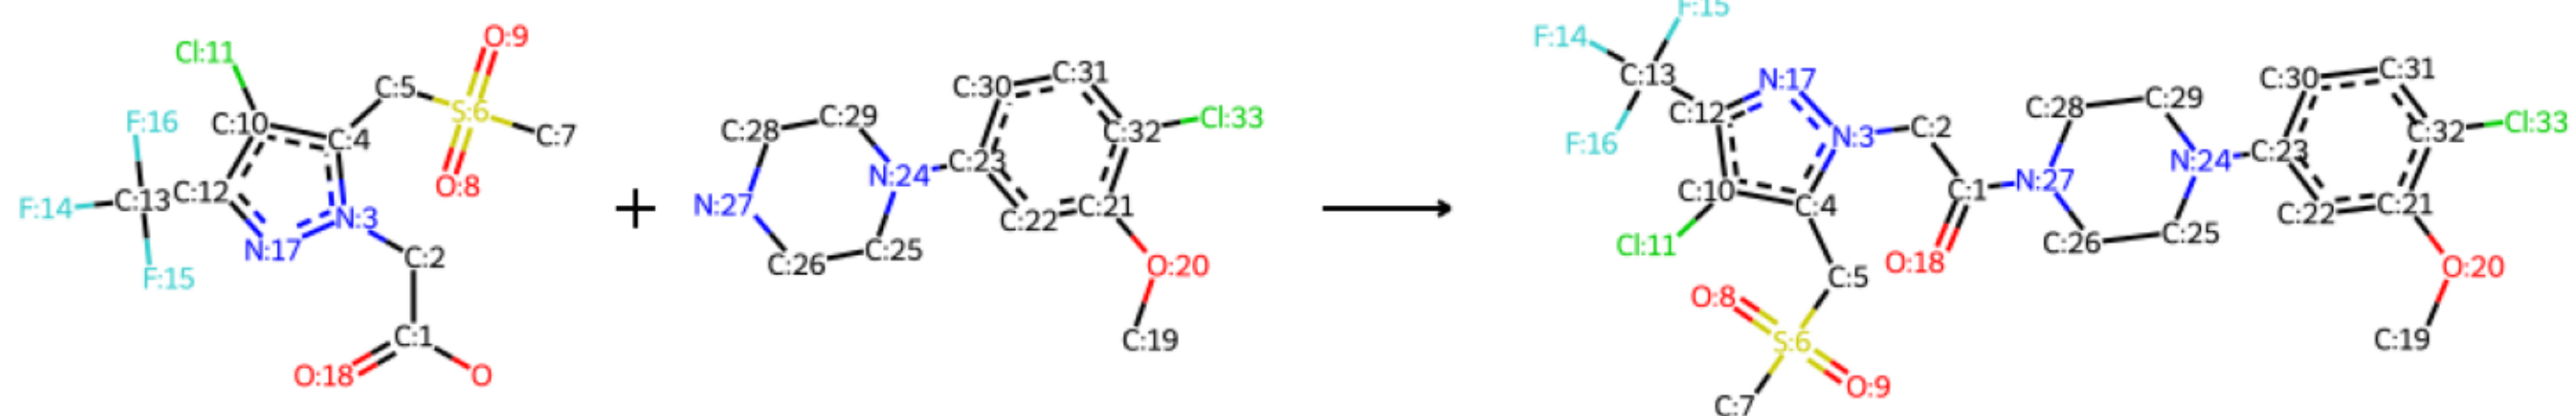

## ELECTRO-generated mechanistic pathway

[Arrow order: (1) green, (2) blue, (3) red, (4) orange]

step #1

Product(s)

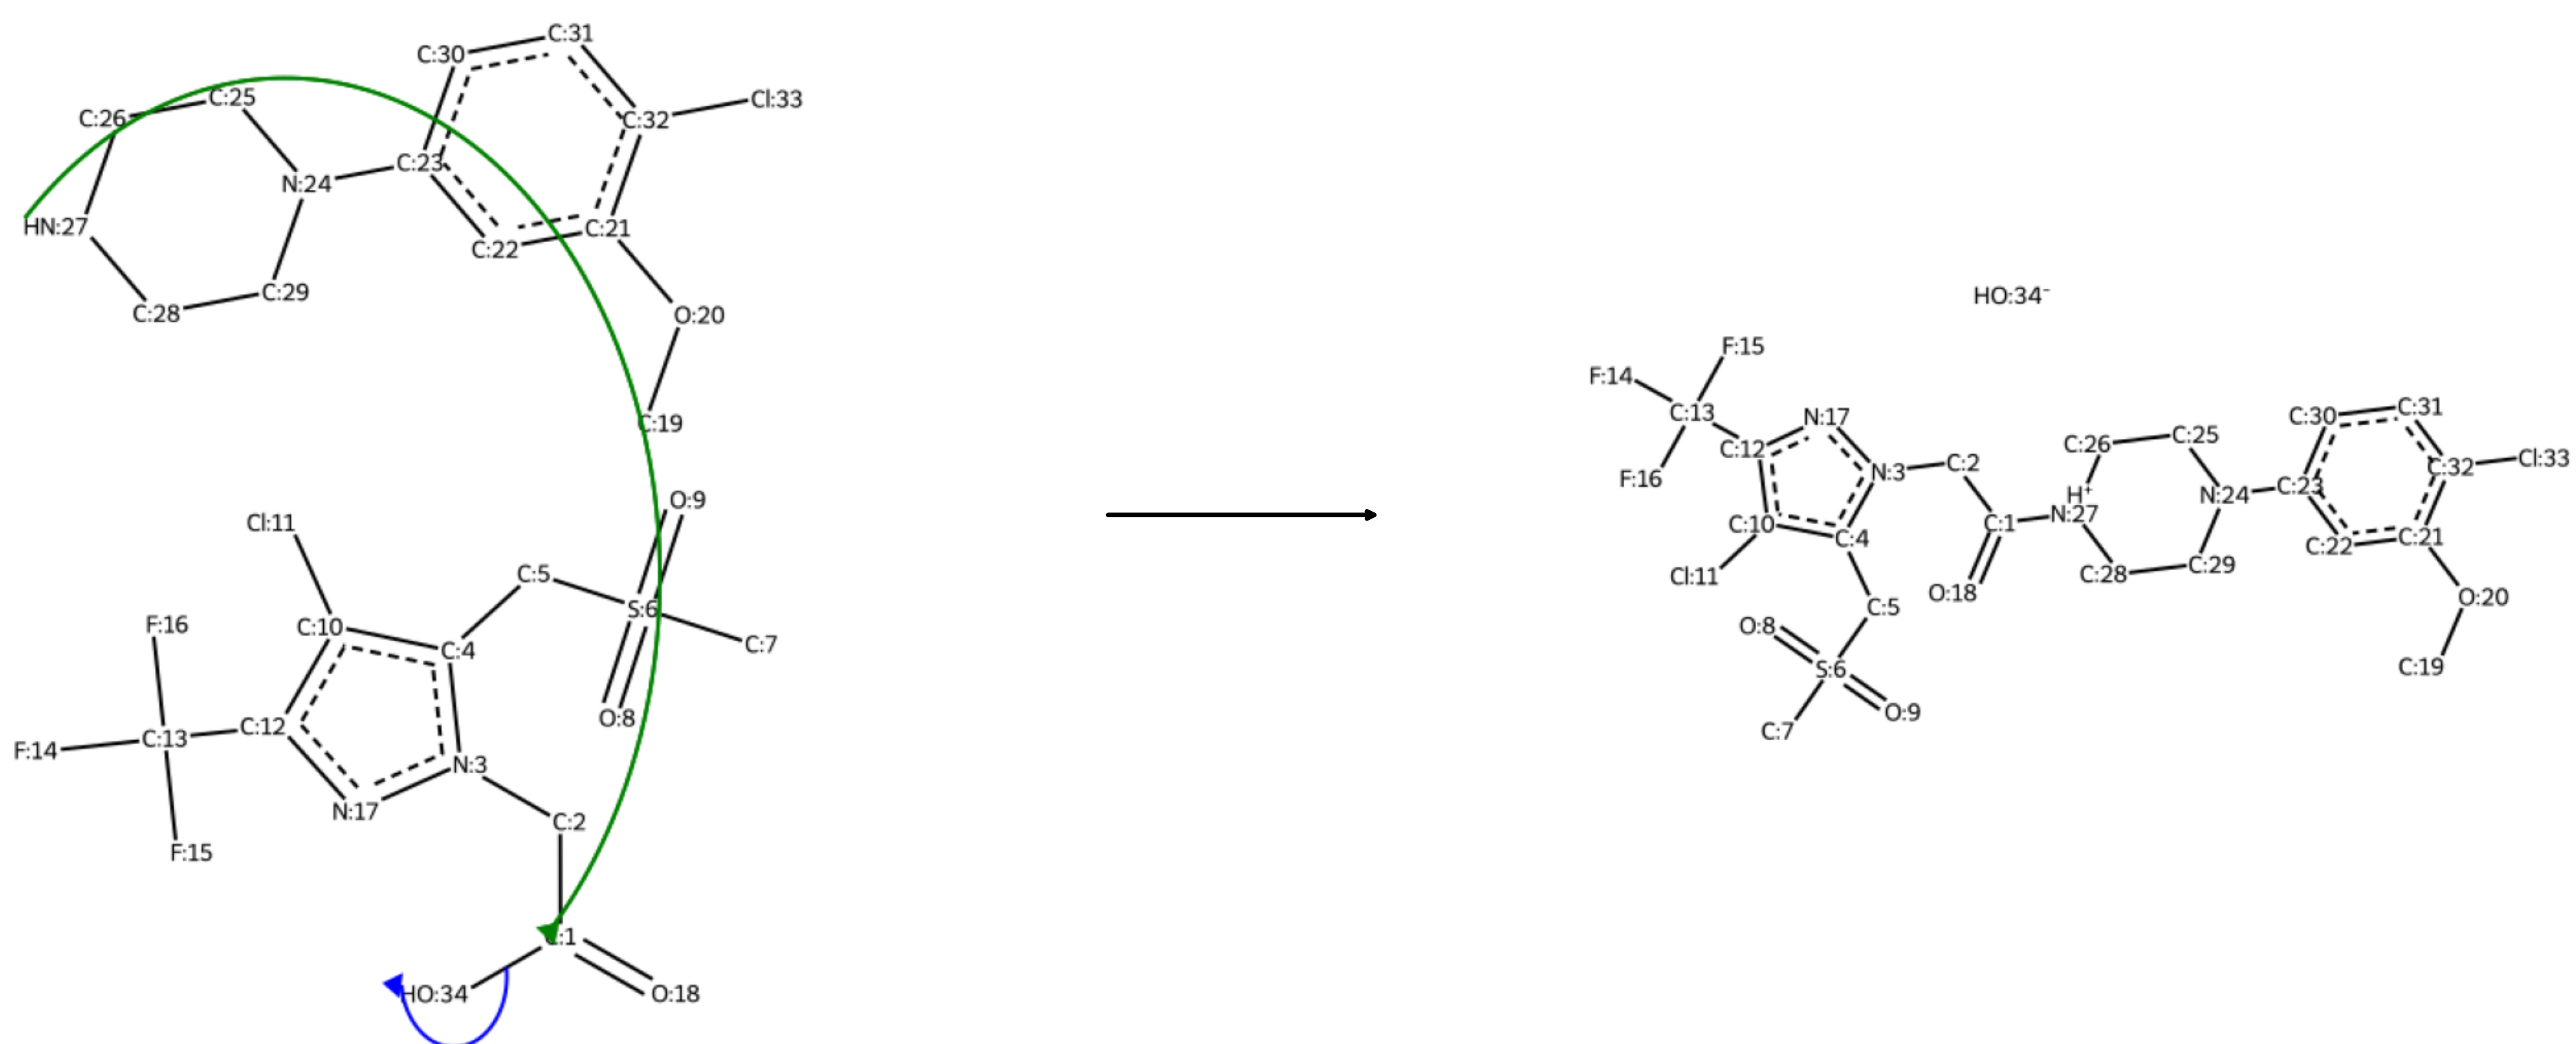



# Original reaction RXN\_ID:86

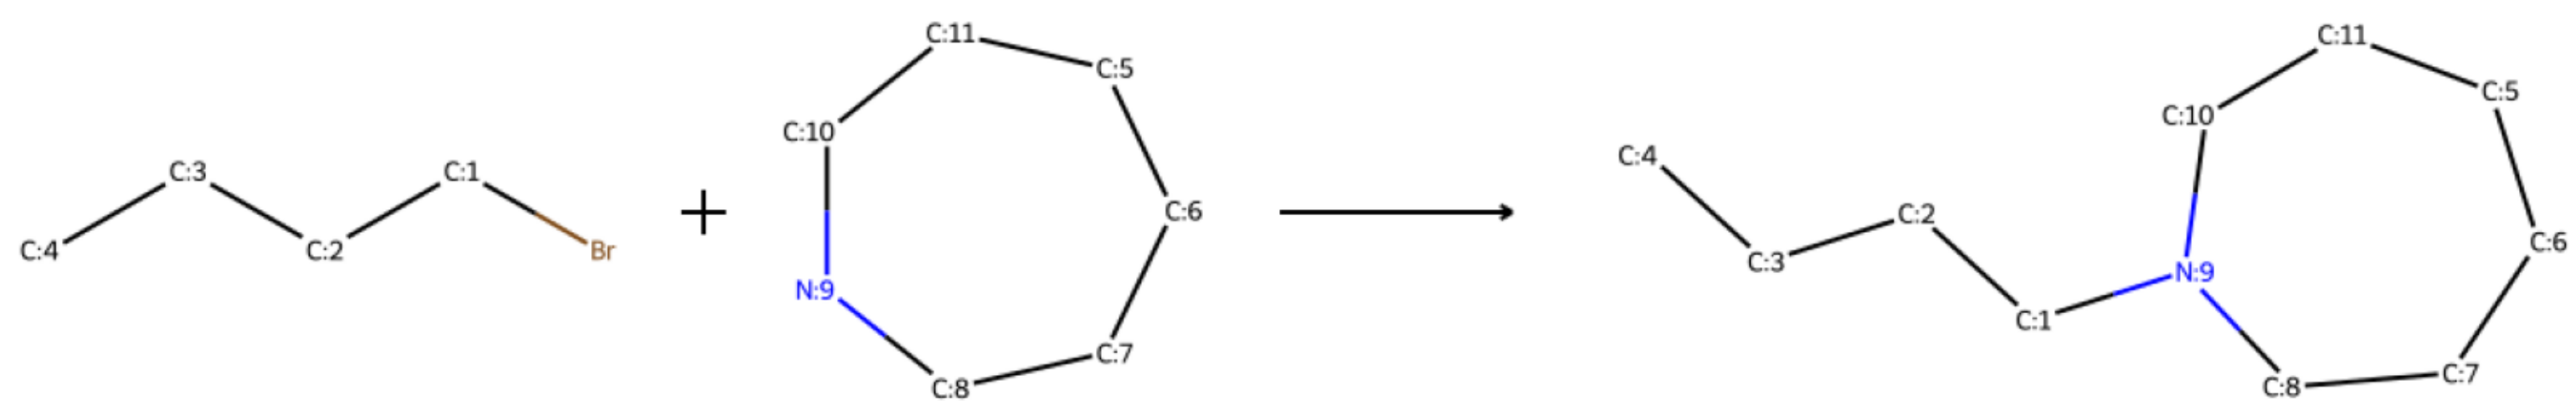

## ELECTRO-generated mechanistic pathway

[Arrow order: (1) green, (2) blue, (3) red, (4) orange]

step #1

Product(s)

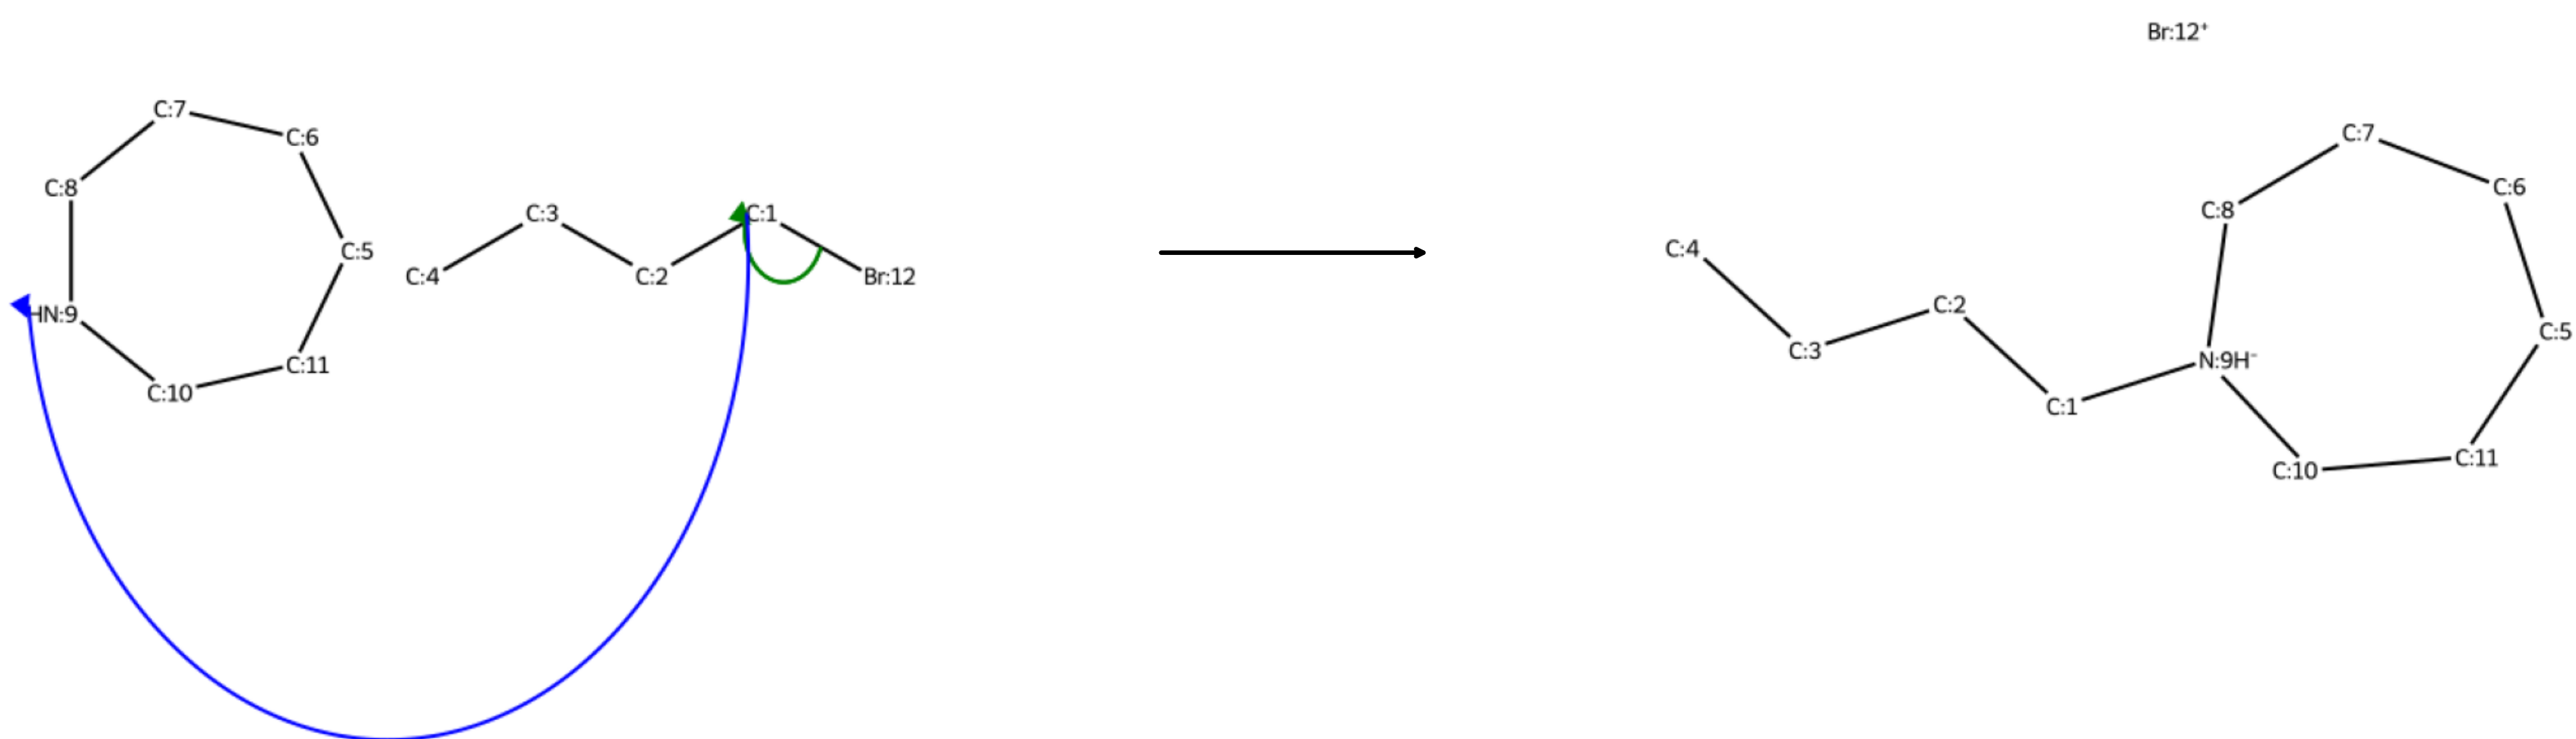

# Original reaction RXN\_ID:87

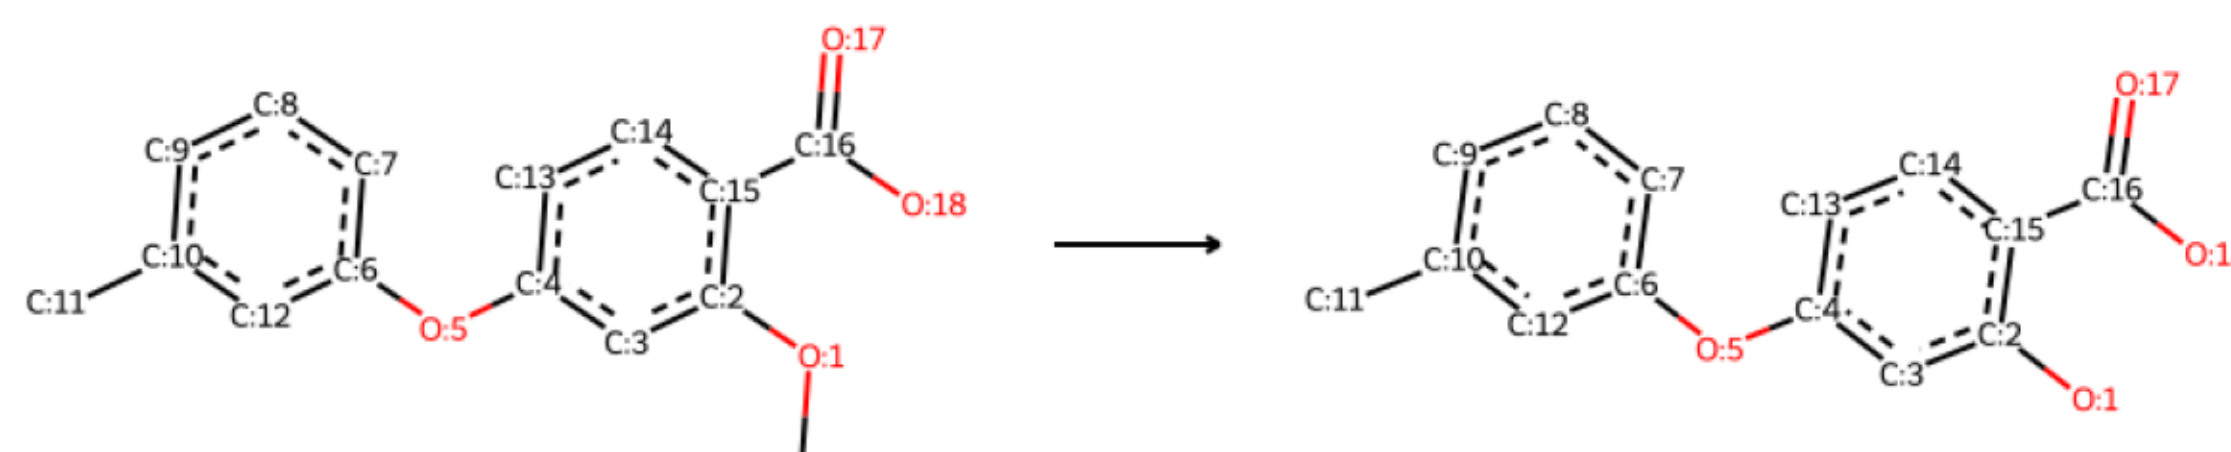

## ELECTRO-generated mechanistic pathway

[Arrow order: (1) green, (2) blue, (3) red, (4) orange]

step #1

Product(s)

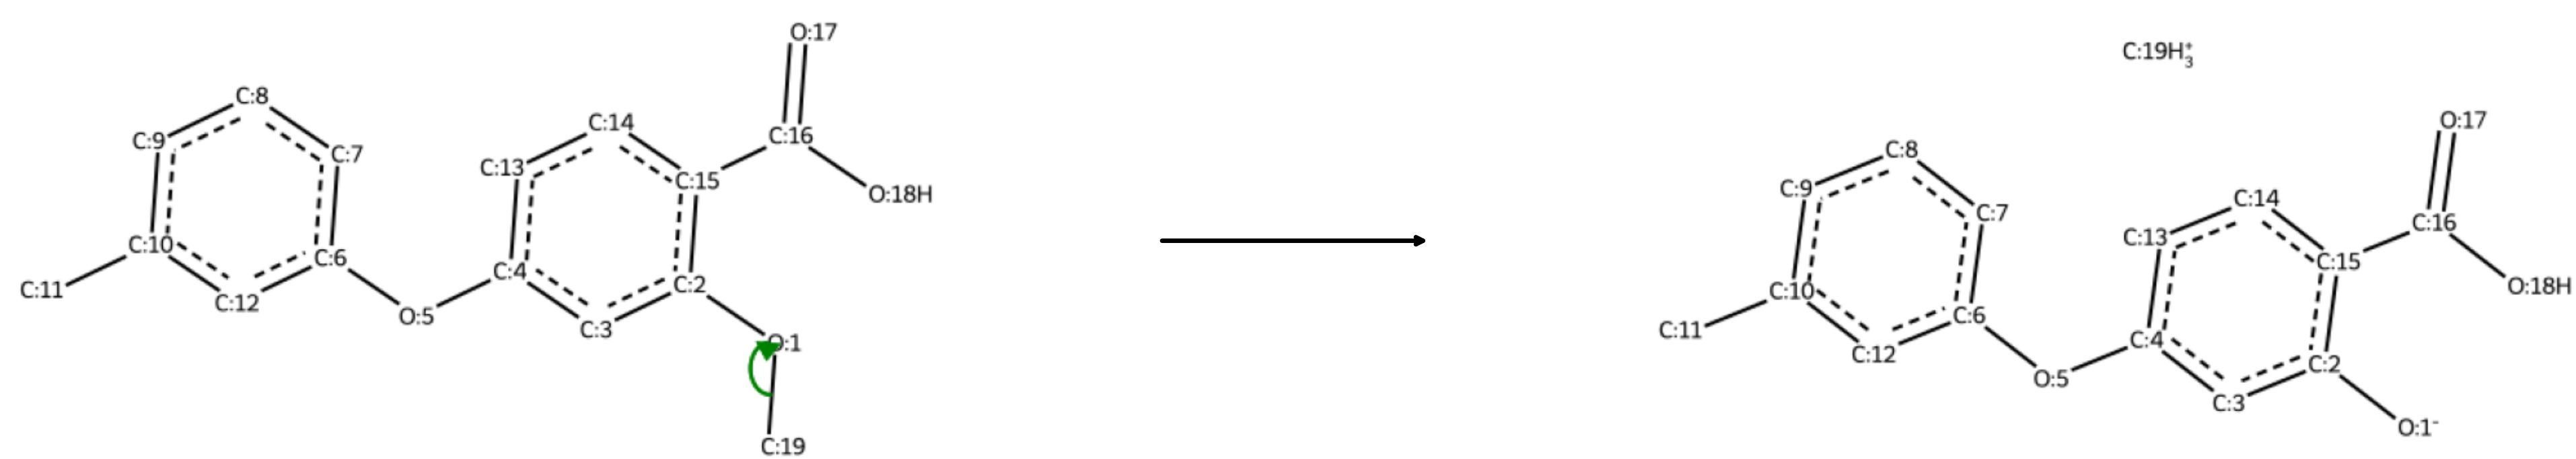



# Original reaction RXN\_ID:88

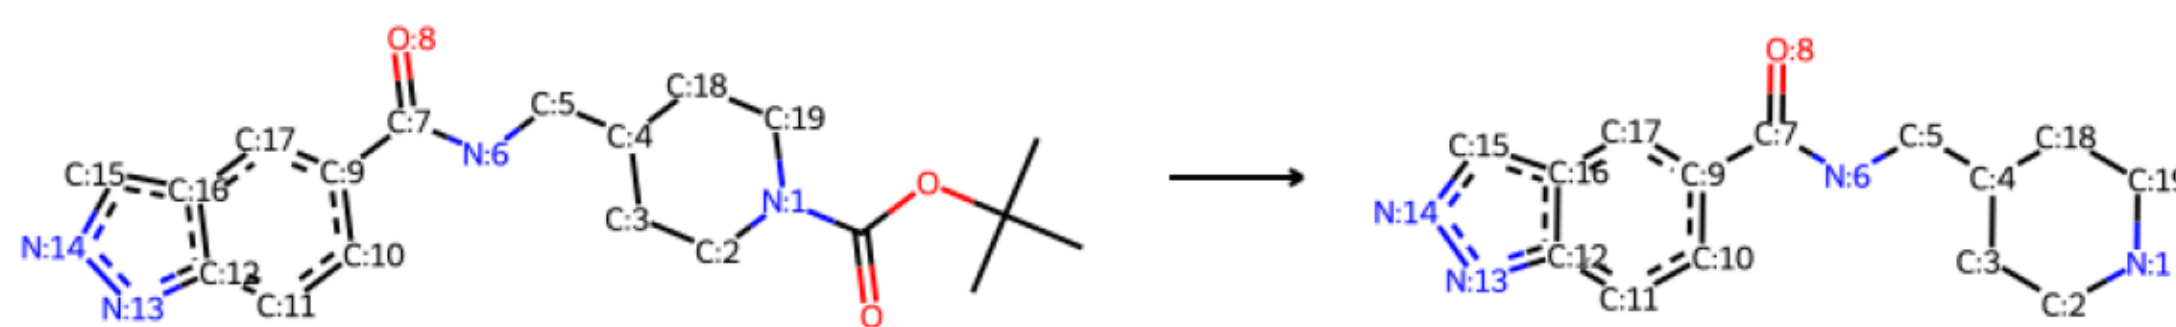

## ELECTRO-generated mechanistic pathway

[Arrow order: (1) green, (2) blue, (3) red, (4) orange]

step #1

Product(s)

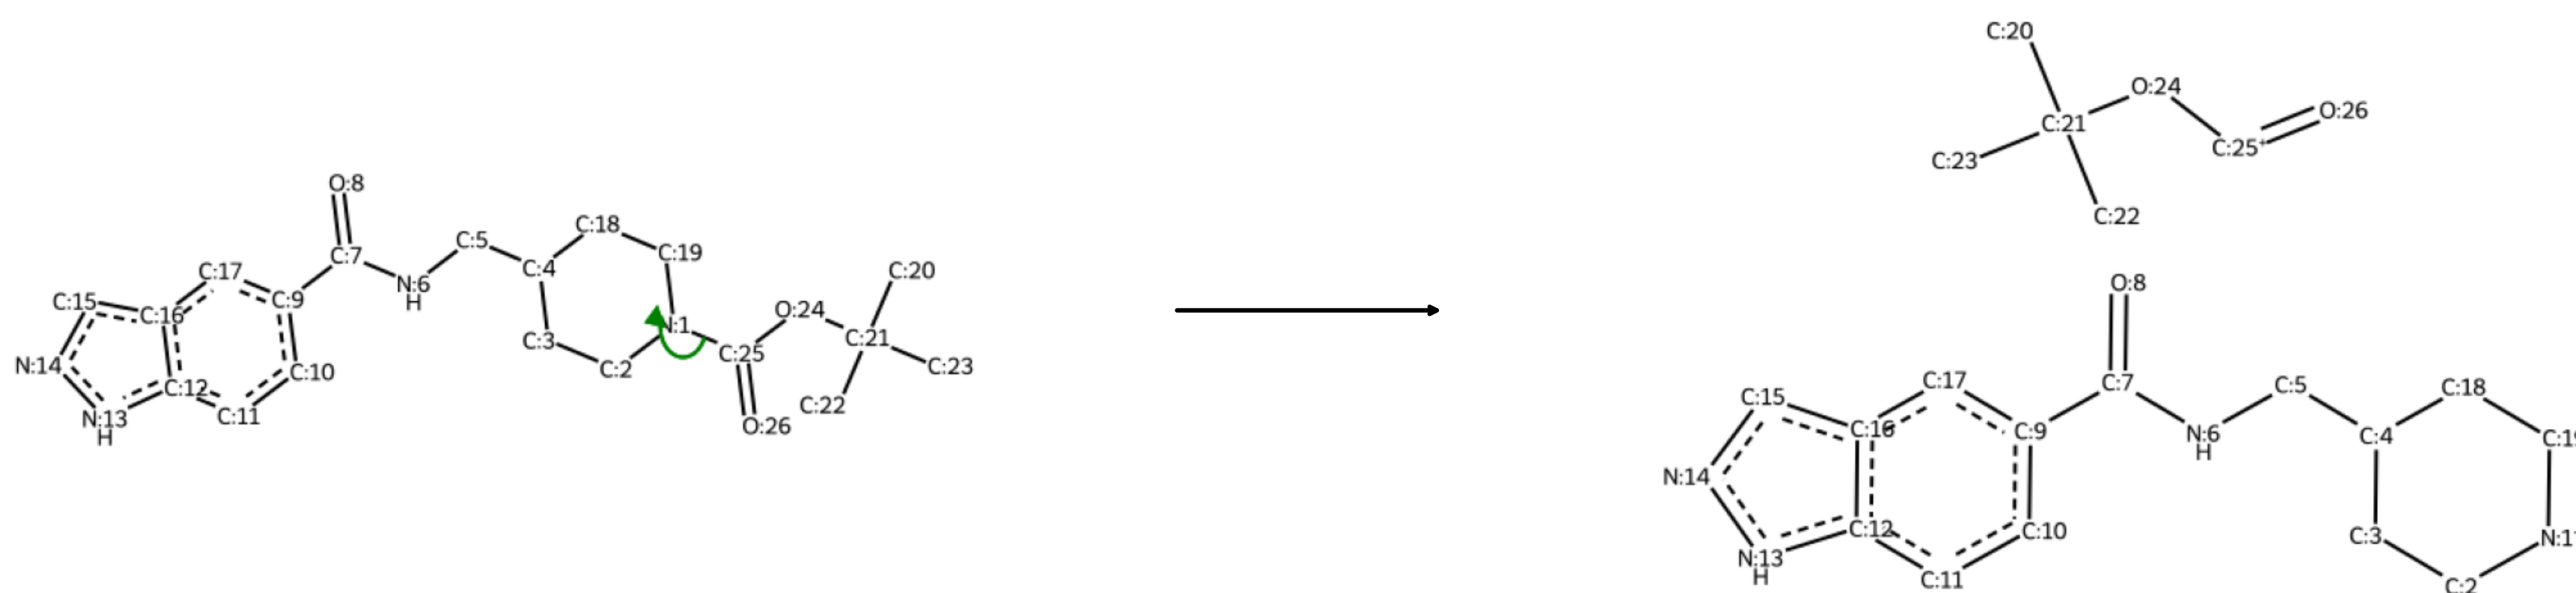

# Original reaction RXN\_ID:89

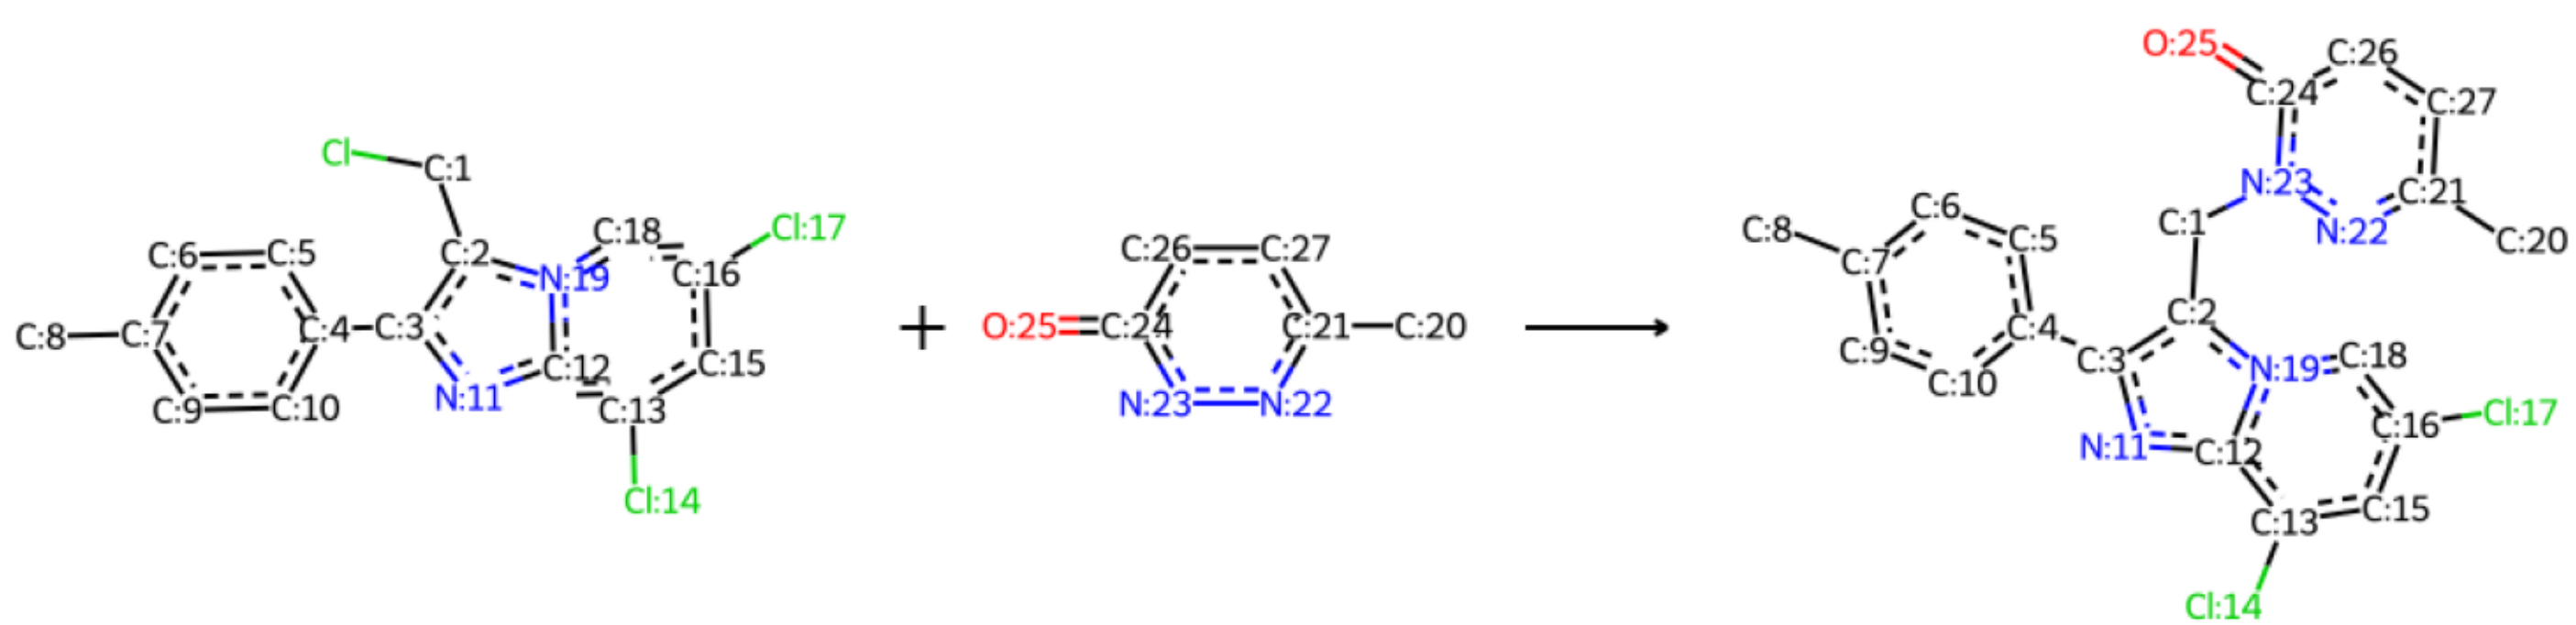

## ELECTRO-generated mechanistic pathway

[Arrow order: (1) green, (2) blue, (3) red, (4) orange]

step #1

Product(s)

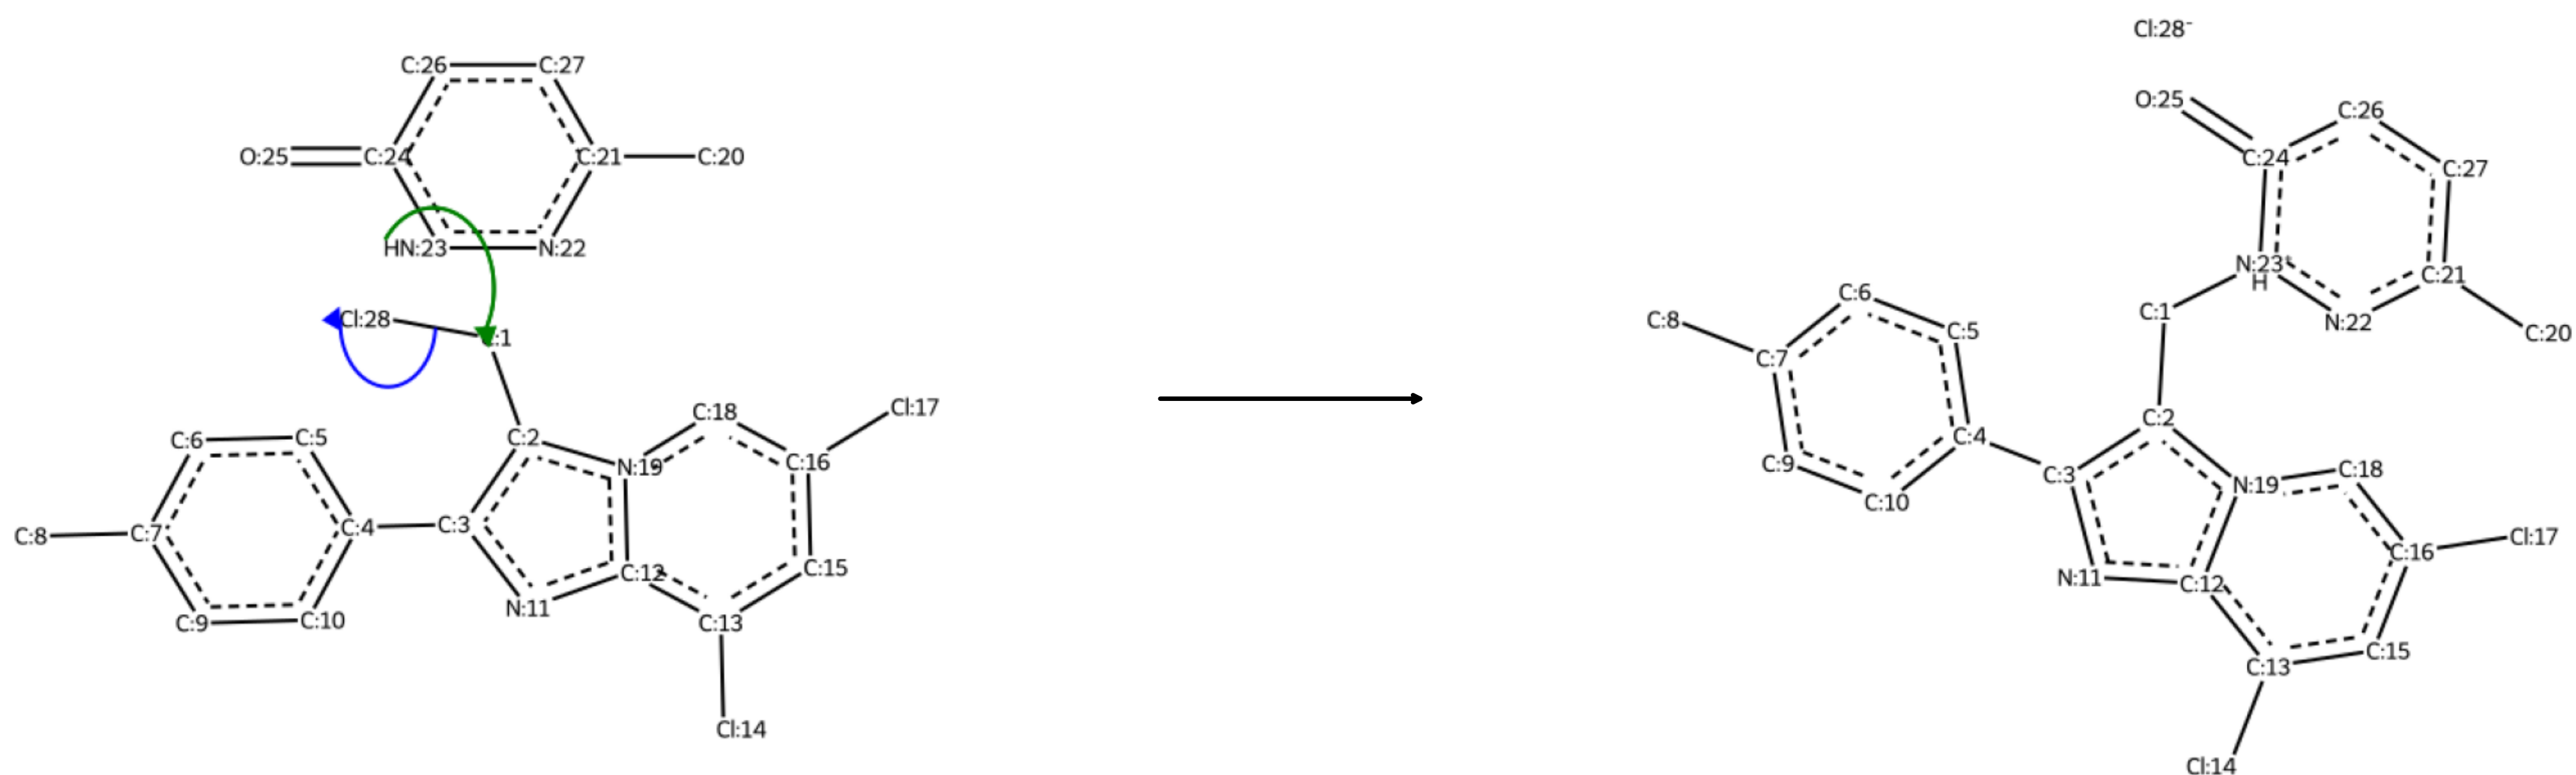



# Original reaction RXN\_ID:90

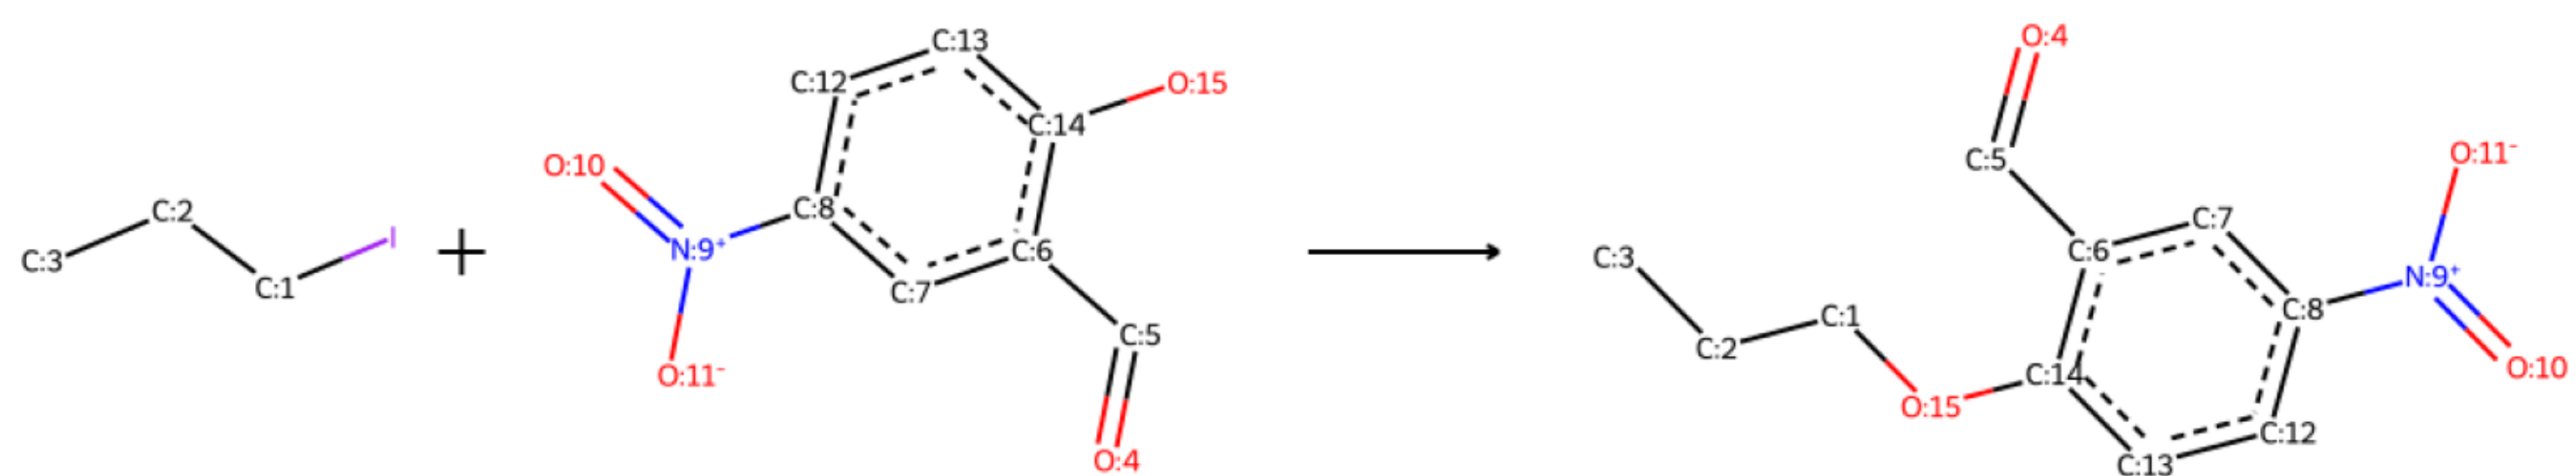

## ELECTRO-generated mechanistic pathway

[Arrow order: (1) green, (2) blue, (3) red, (4) orange]

step #1

Product(s)

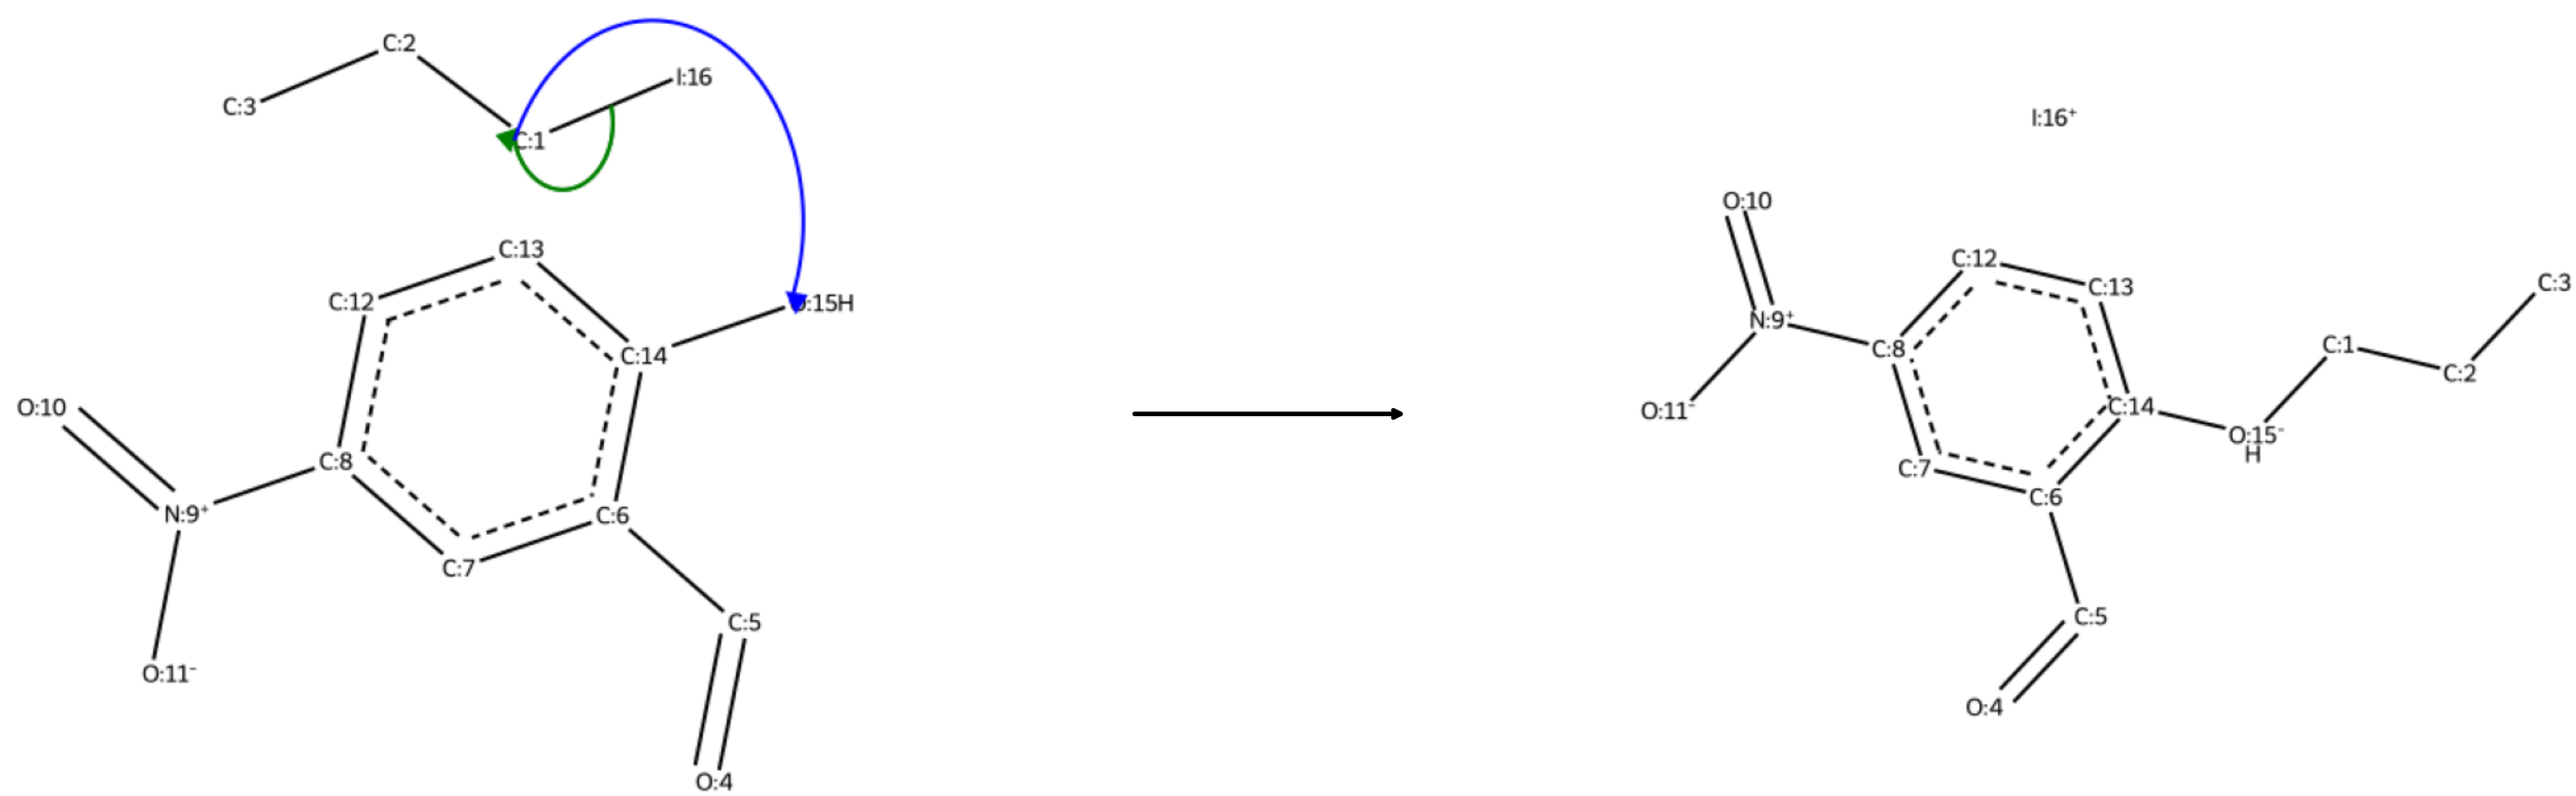

# Original reaction RXN\_ID:91

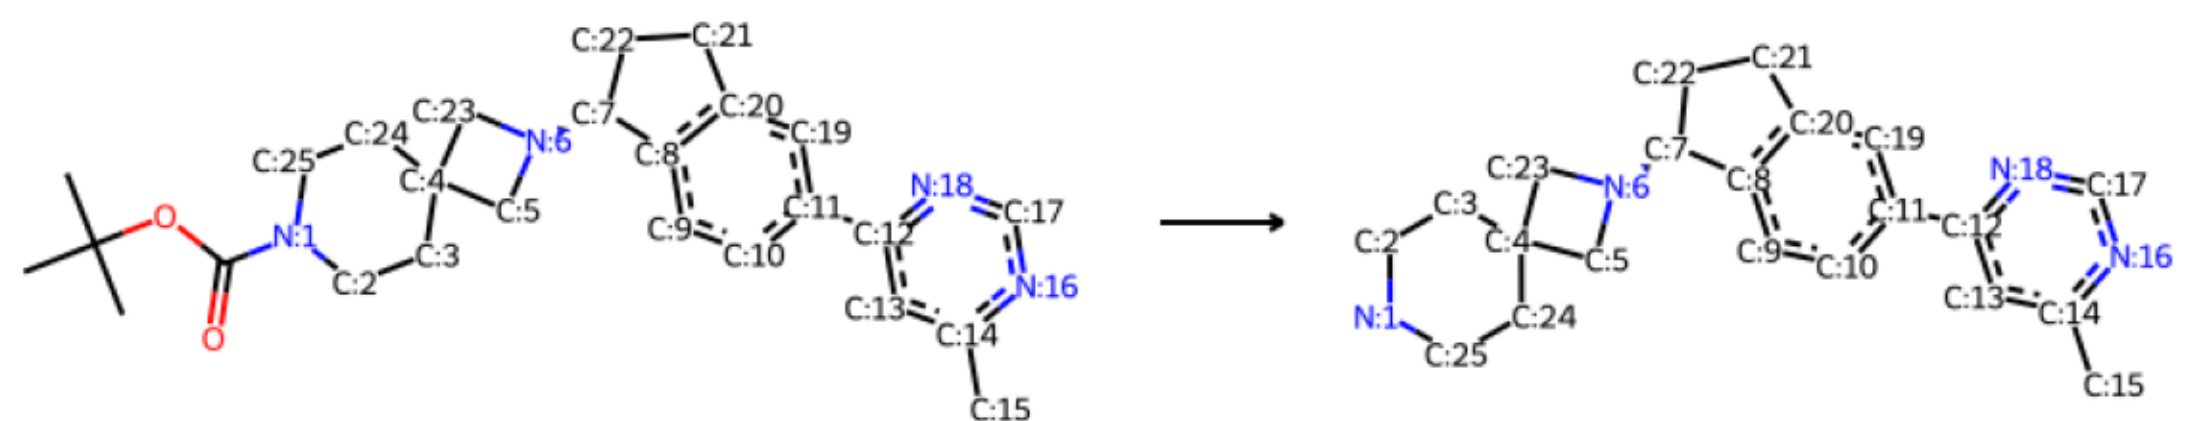

## ELECTRO-generated mechanistic pathway

[Arrow order: (1) green, (2) blue, (3) red, (4) orange]

step #1

Product(s)

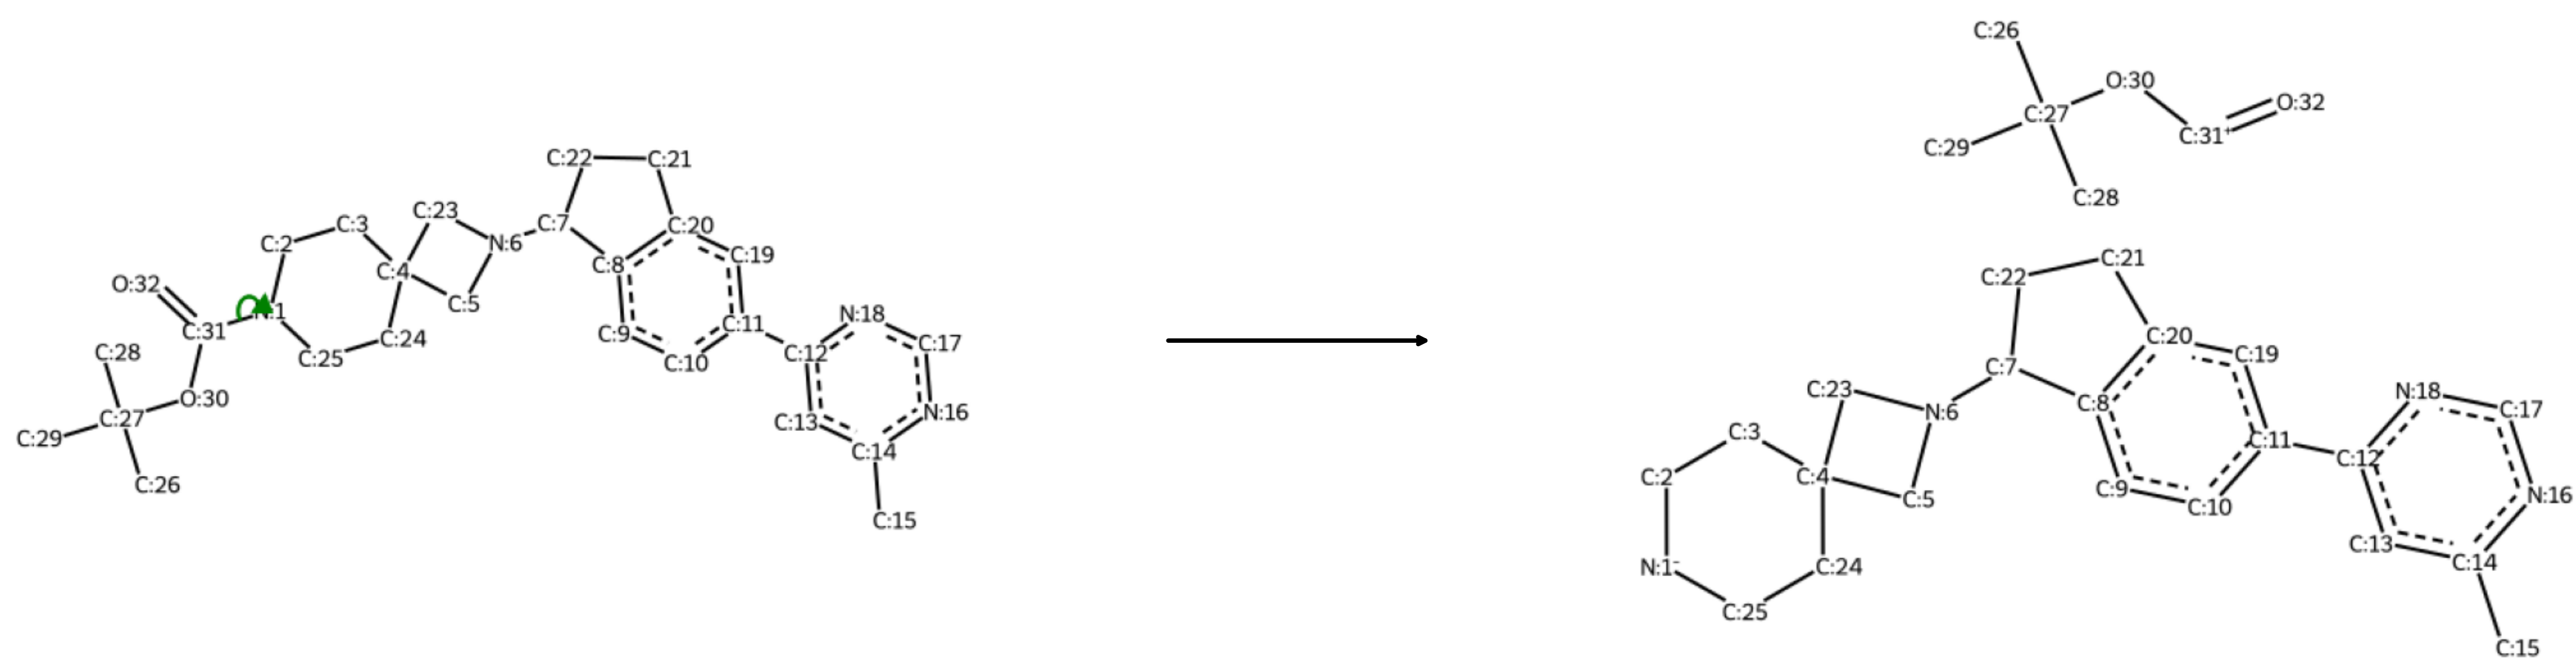



# Original reaction RXN\_ID:92

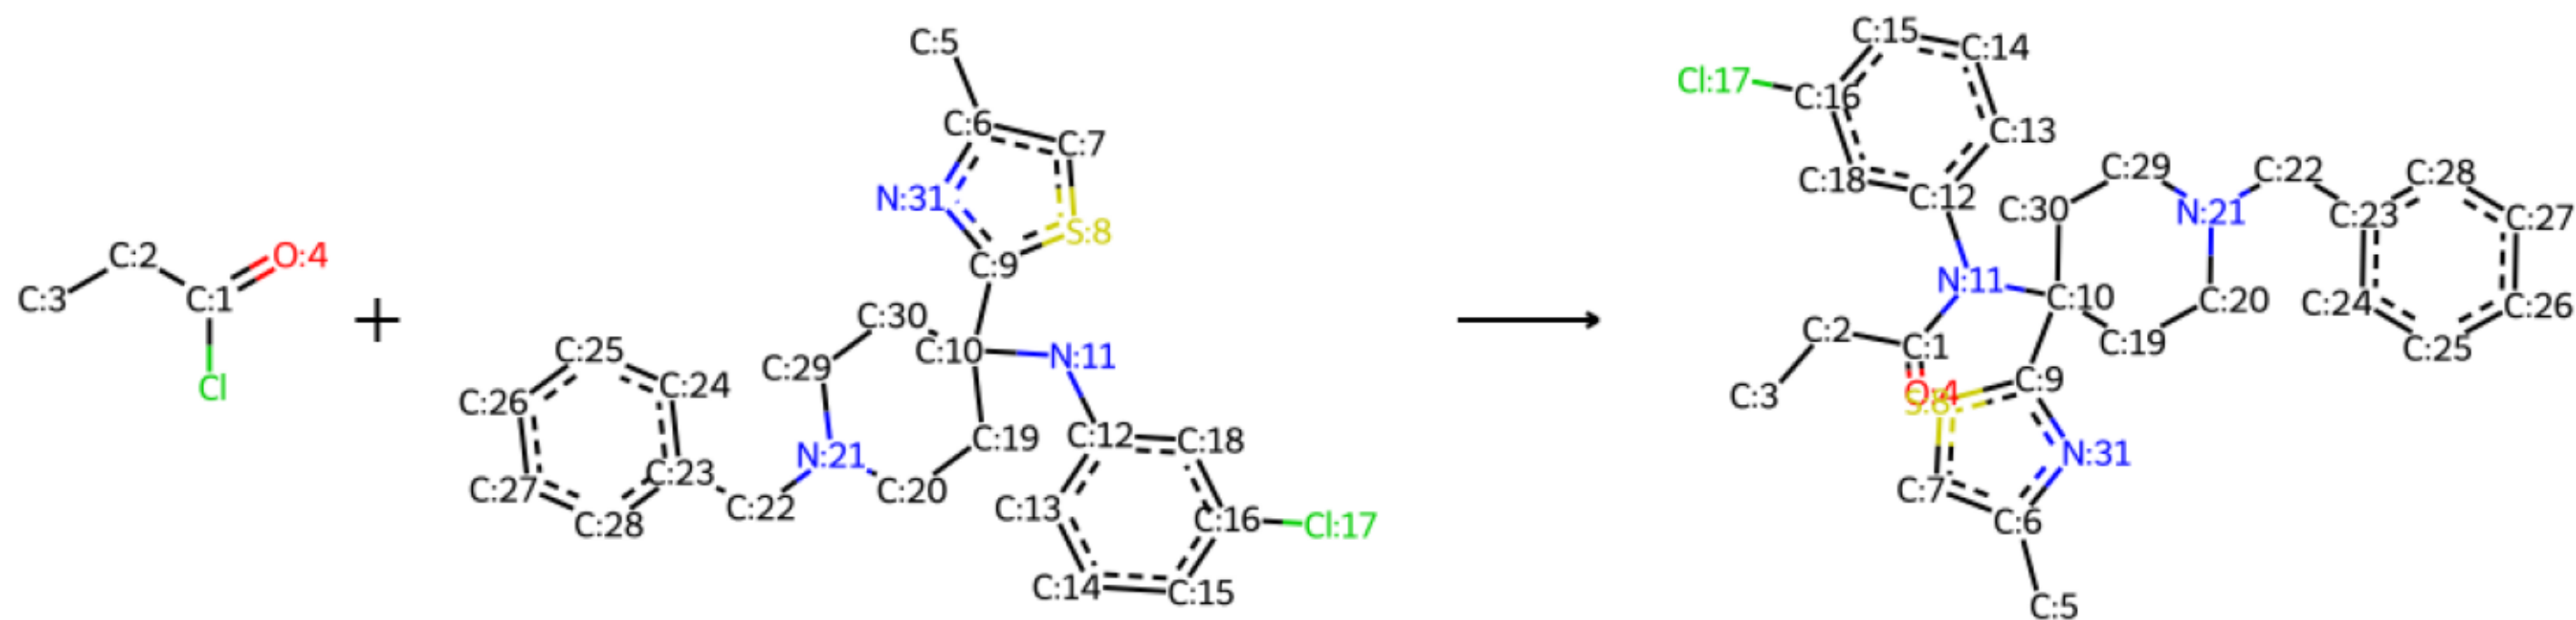

## ELECTRO-generated mechanistic pathway

[Arrow order: (1) green, (2) blue, (3) red, (4) orange]

step #1

Product(s)

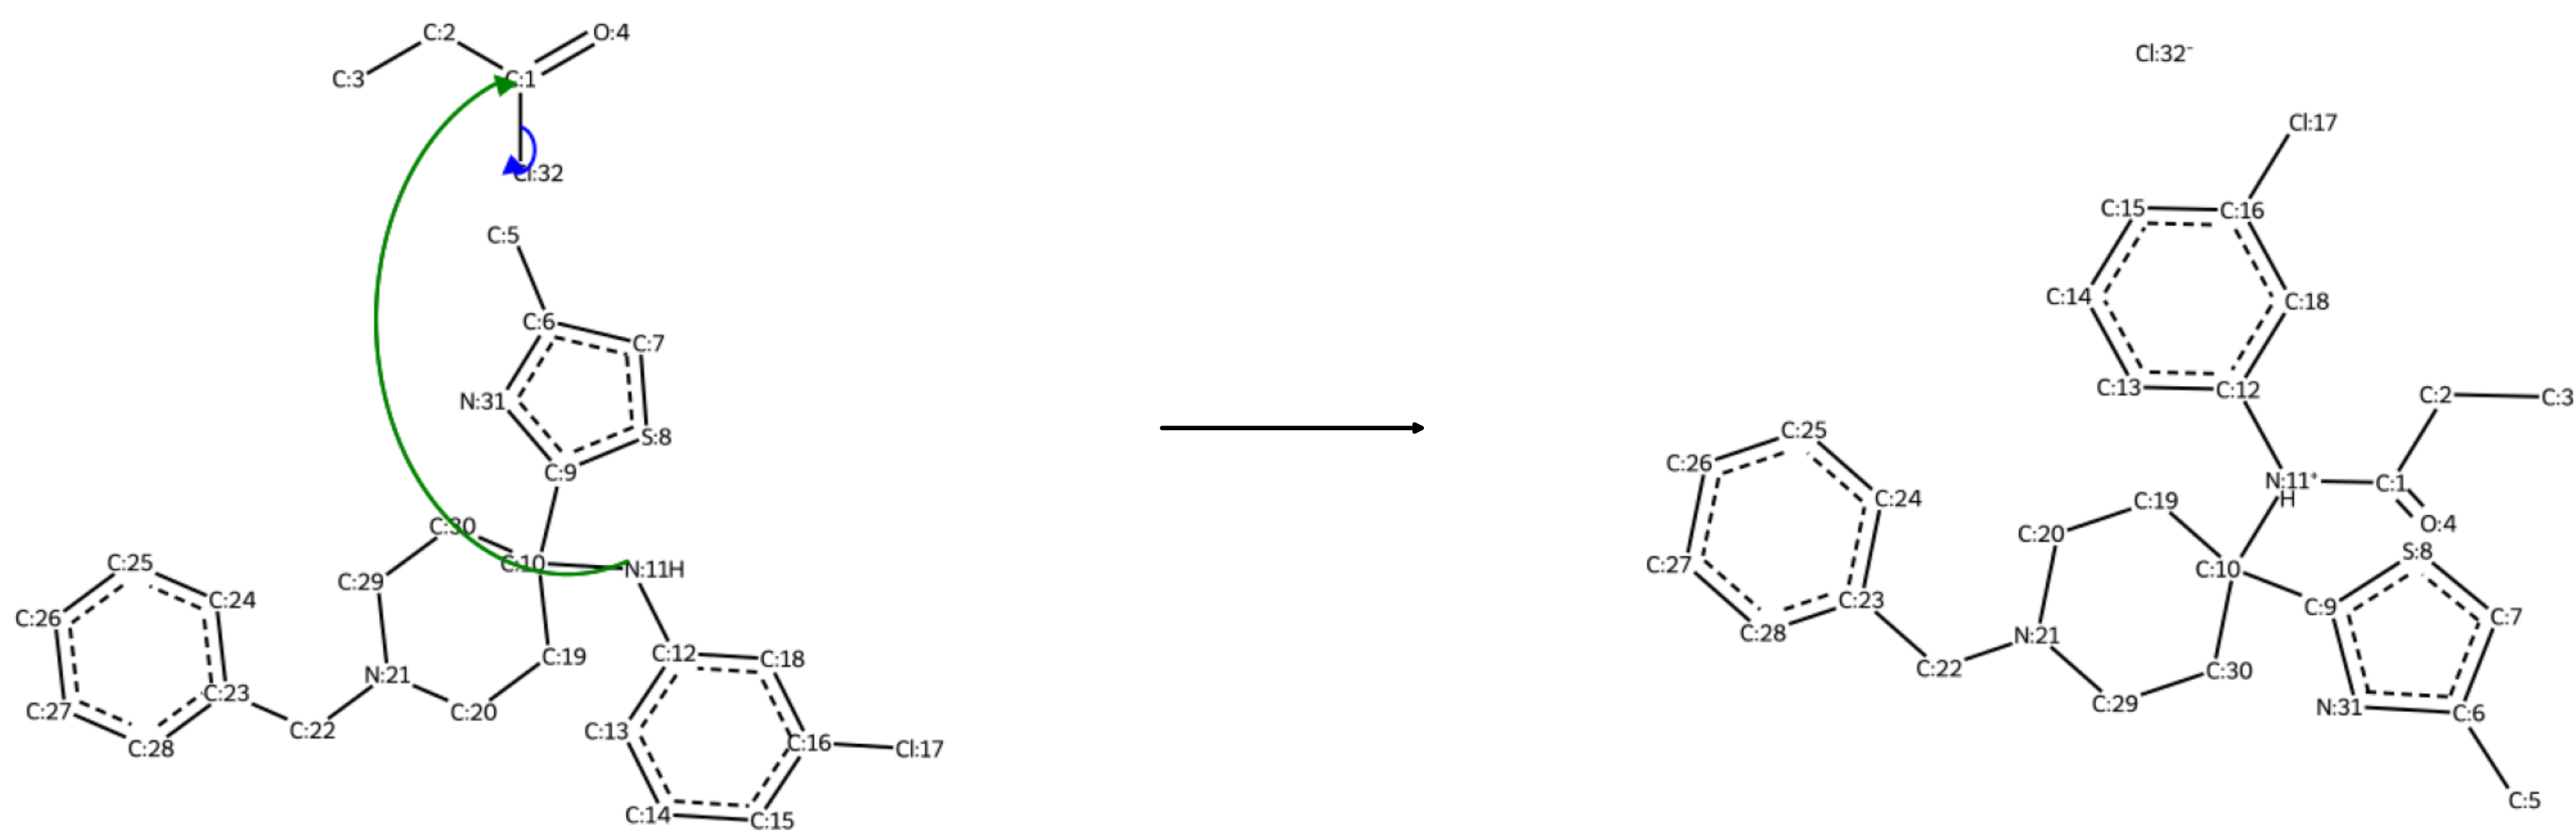

# Original reaction RXN\_ID:93

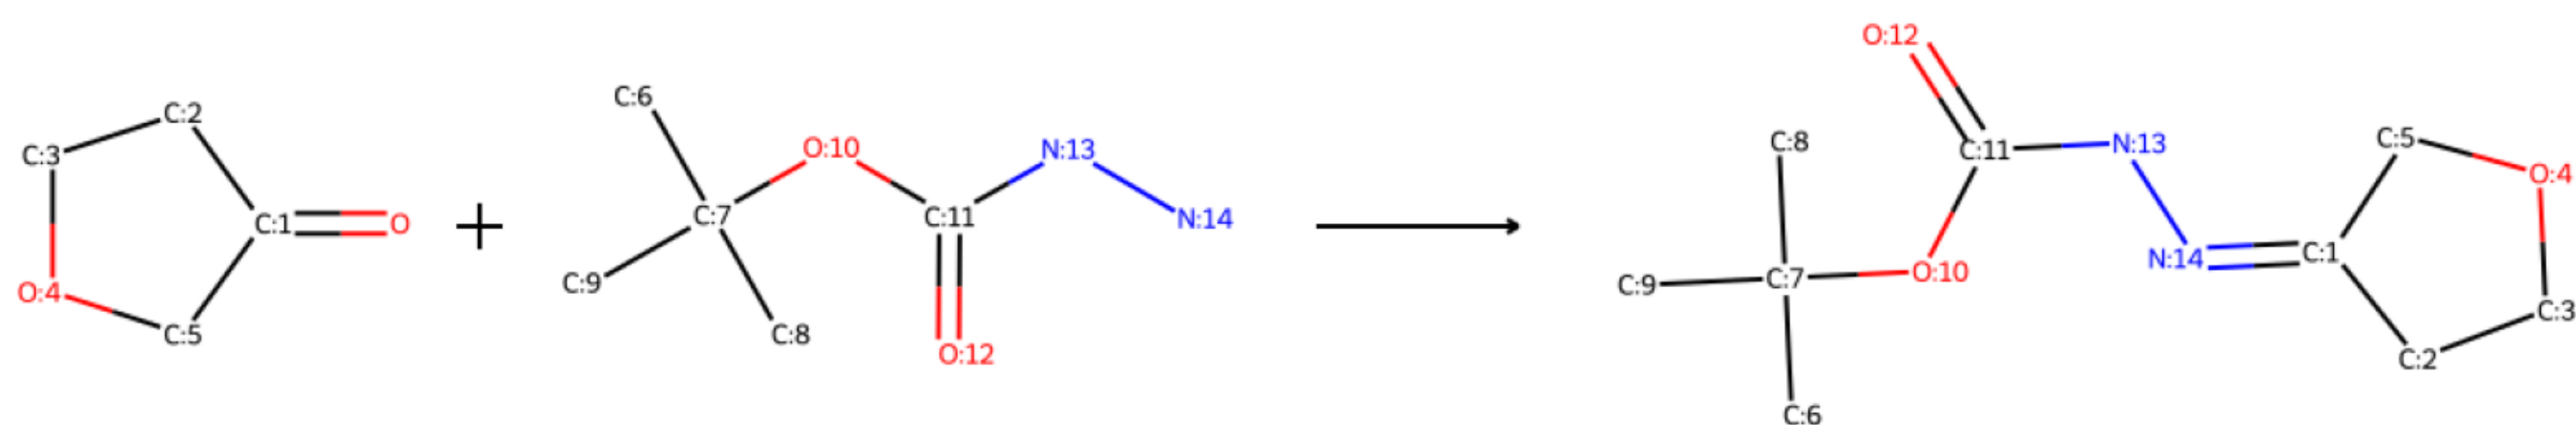

## ELECTRO-generated mechanistic pathway

[Arrow order: (1) green, (2) blue, (3) red, (4) orange]

step #1

Product(s)

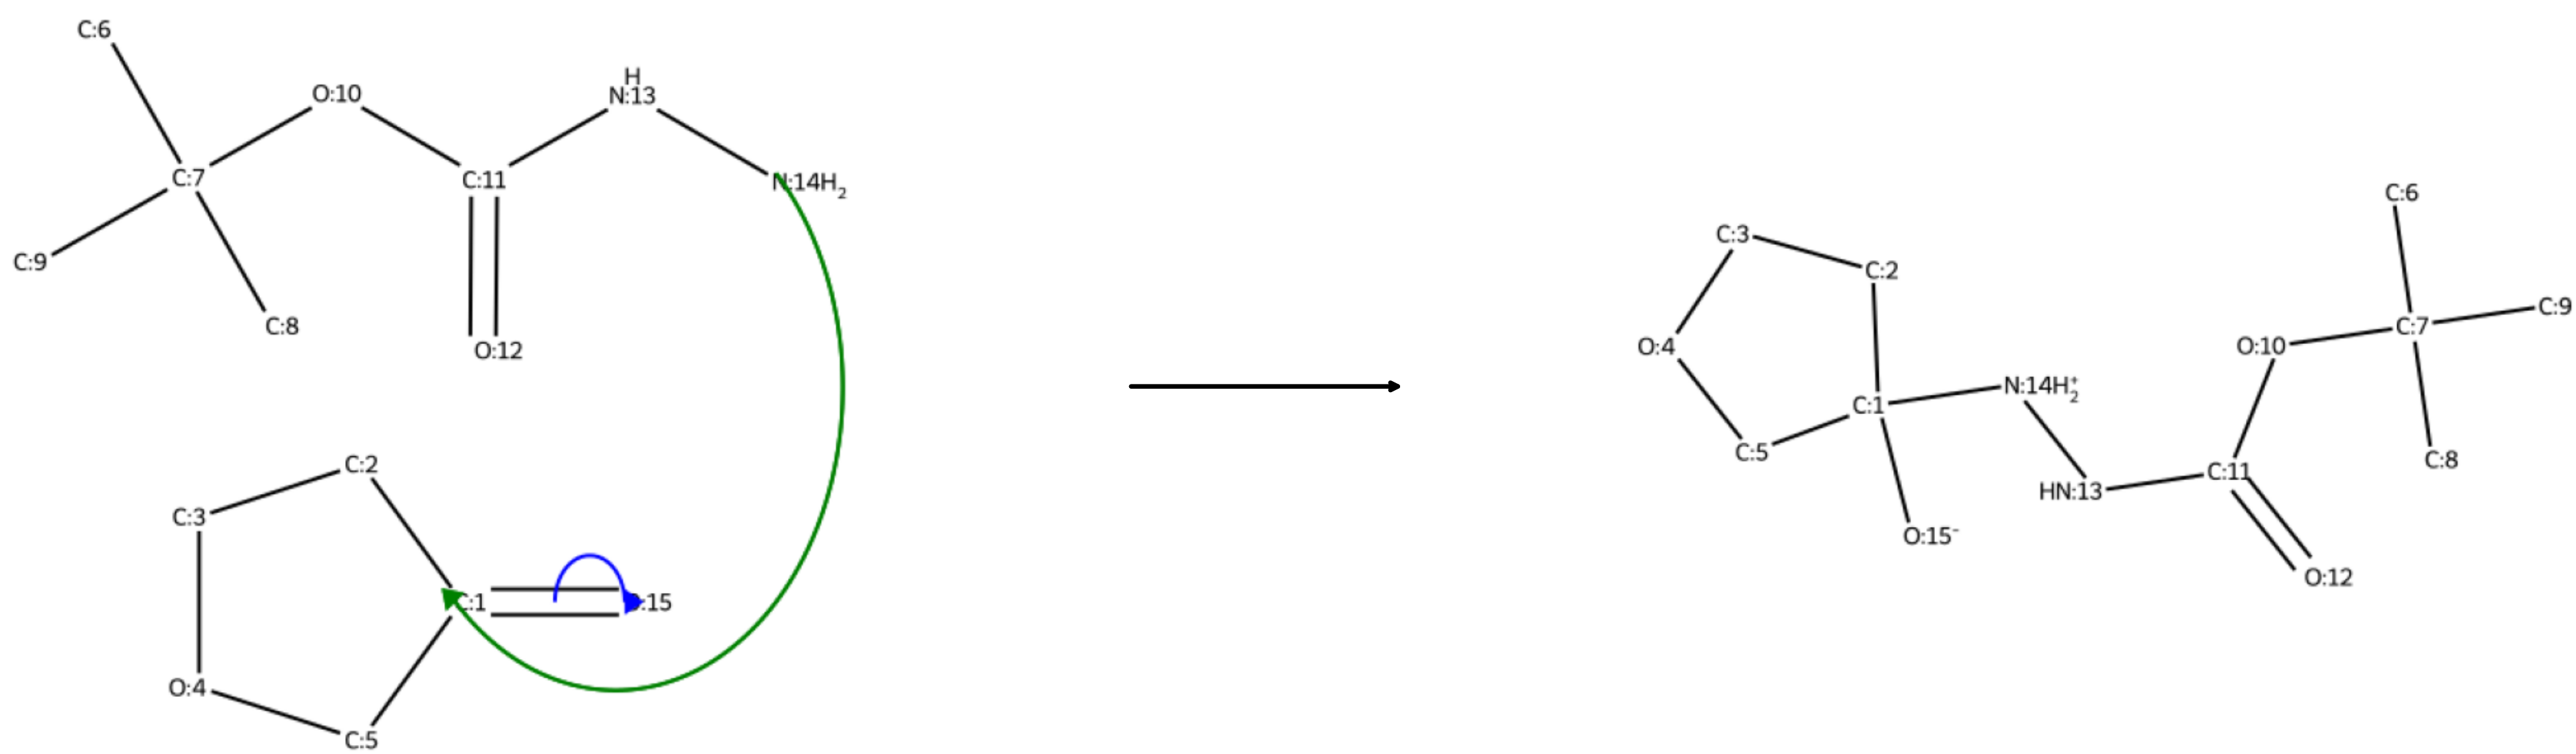



# Original reaction RXN\_ID:94

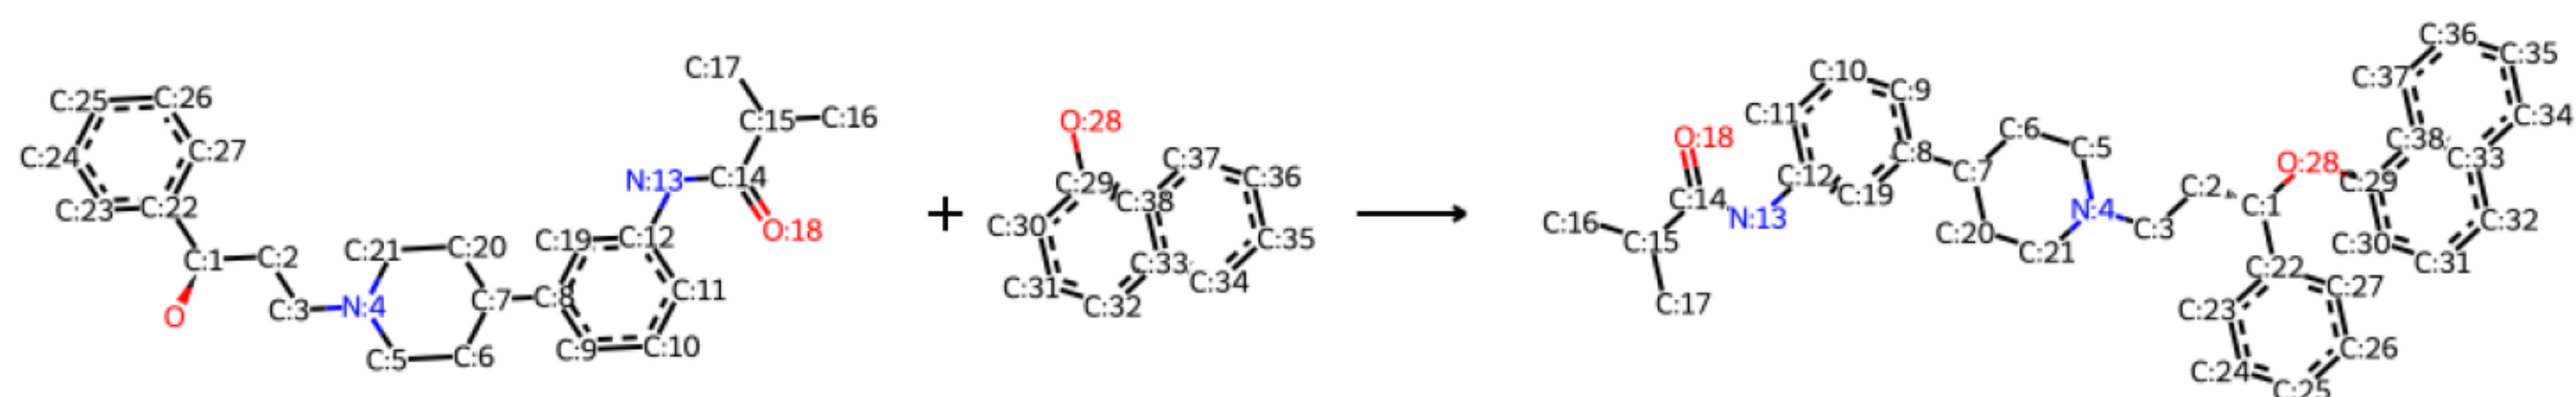

## ELECTRO-generated mechanistic pathway

[Arrow order: (1) green, (2) blue, (3) red, (4) orange]

step #1

Product(s)

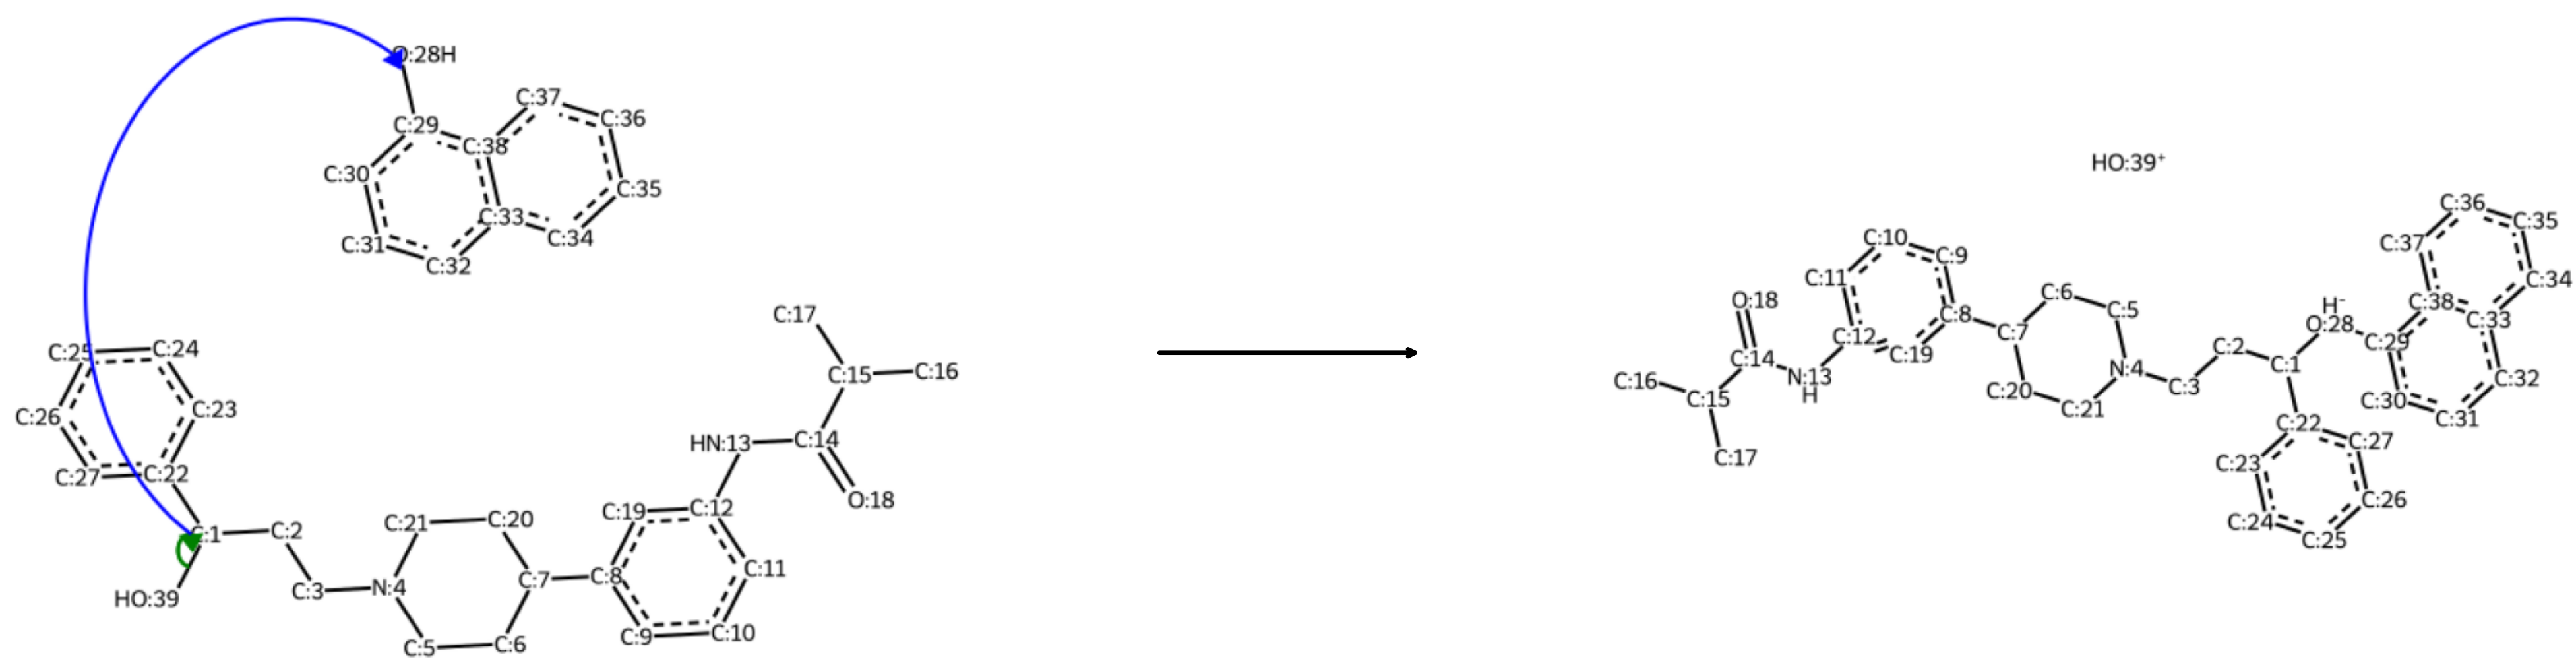

# Original reaction RXN\_ID:95

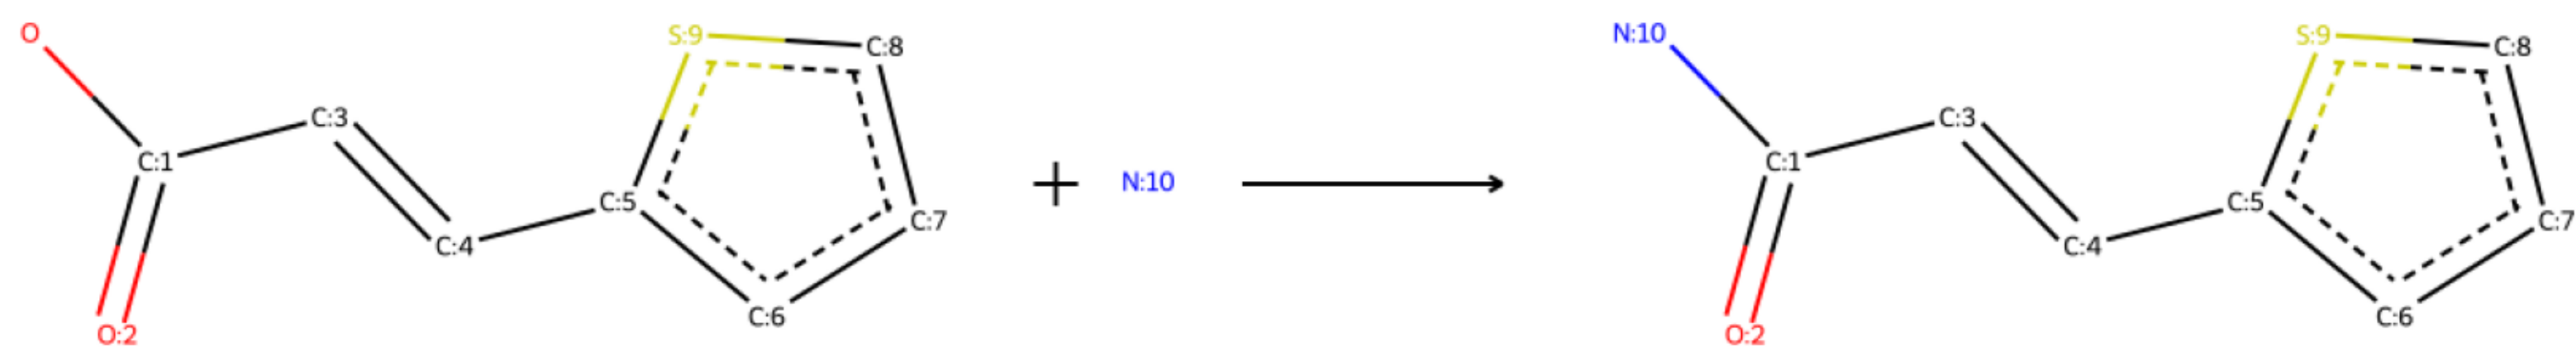

## ELECTRO-generated mechanistic pathway

[Arrow order: (1) green, (2) blue, (3) red, (4) orange]

step #1

Product(s)

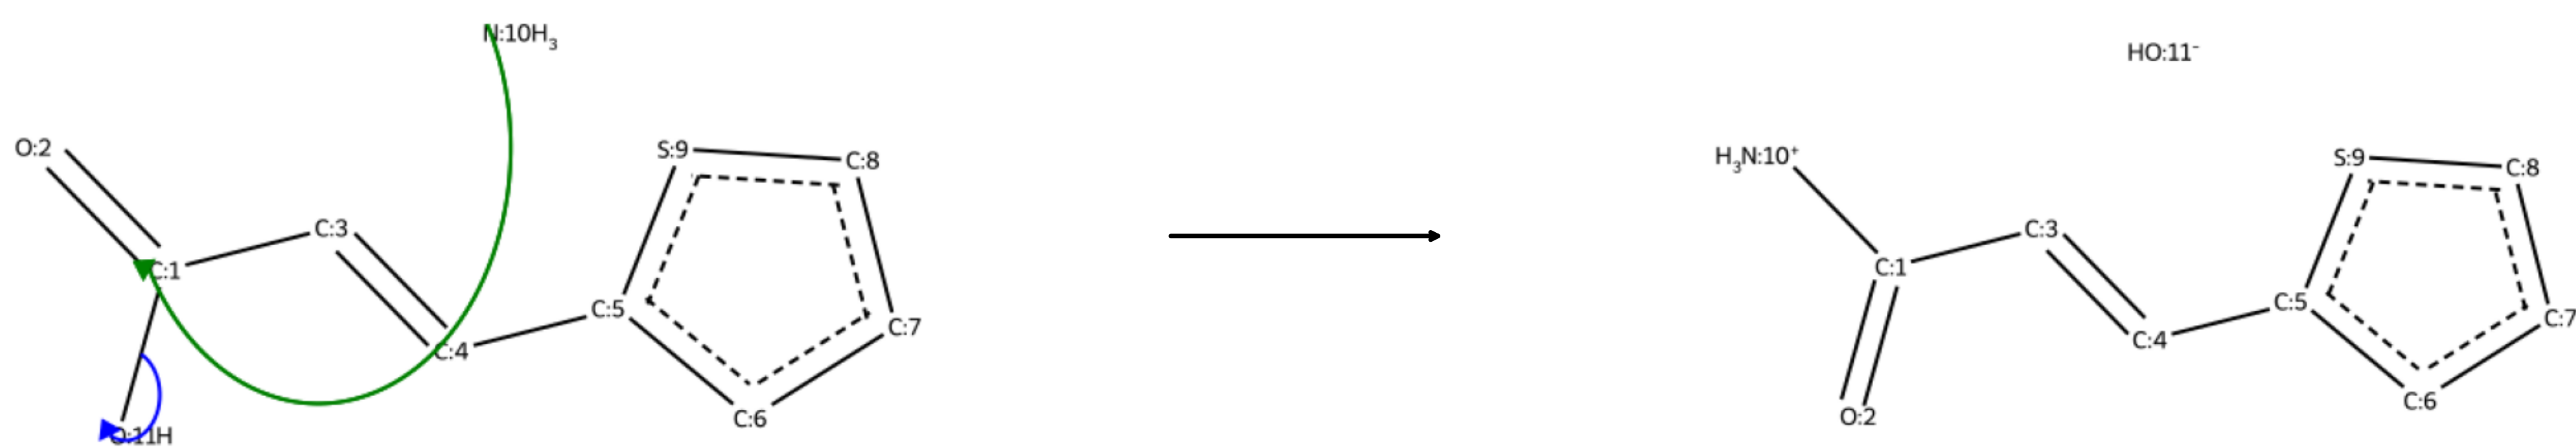



# Original reaction RXN\_ID:96

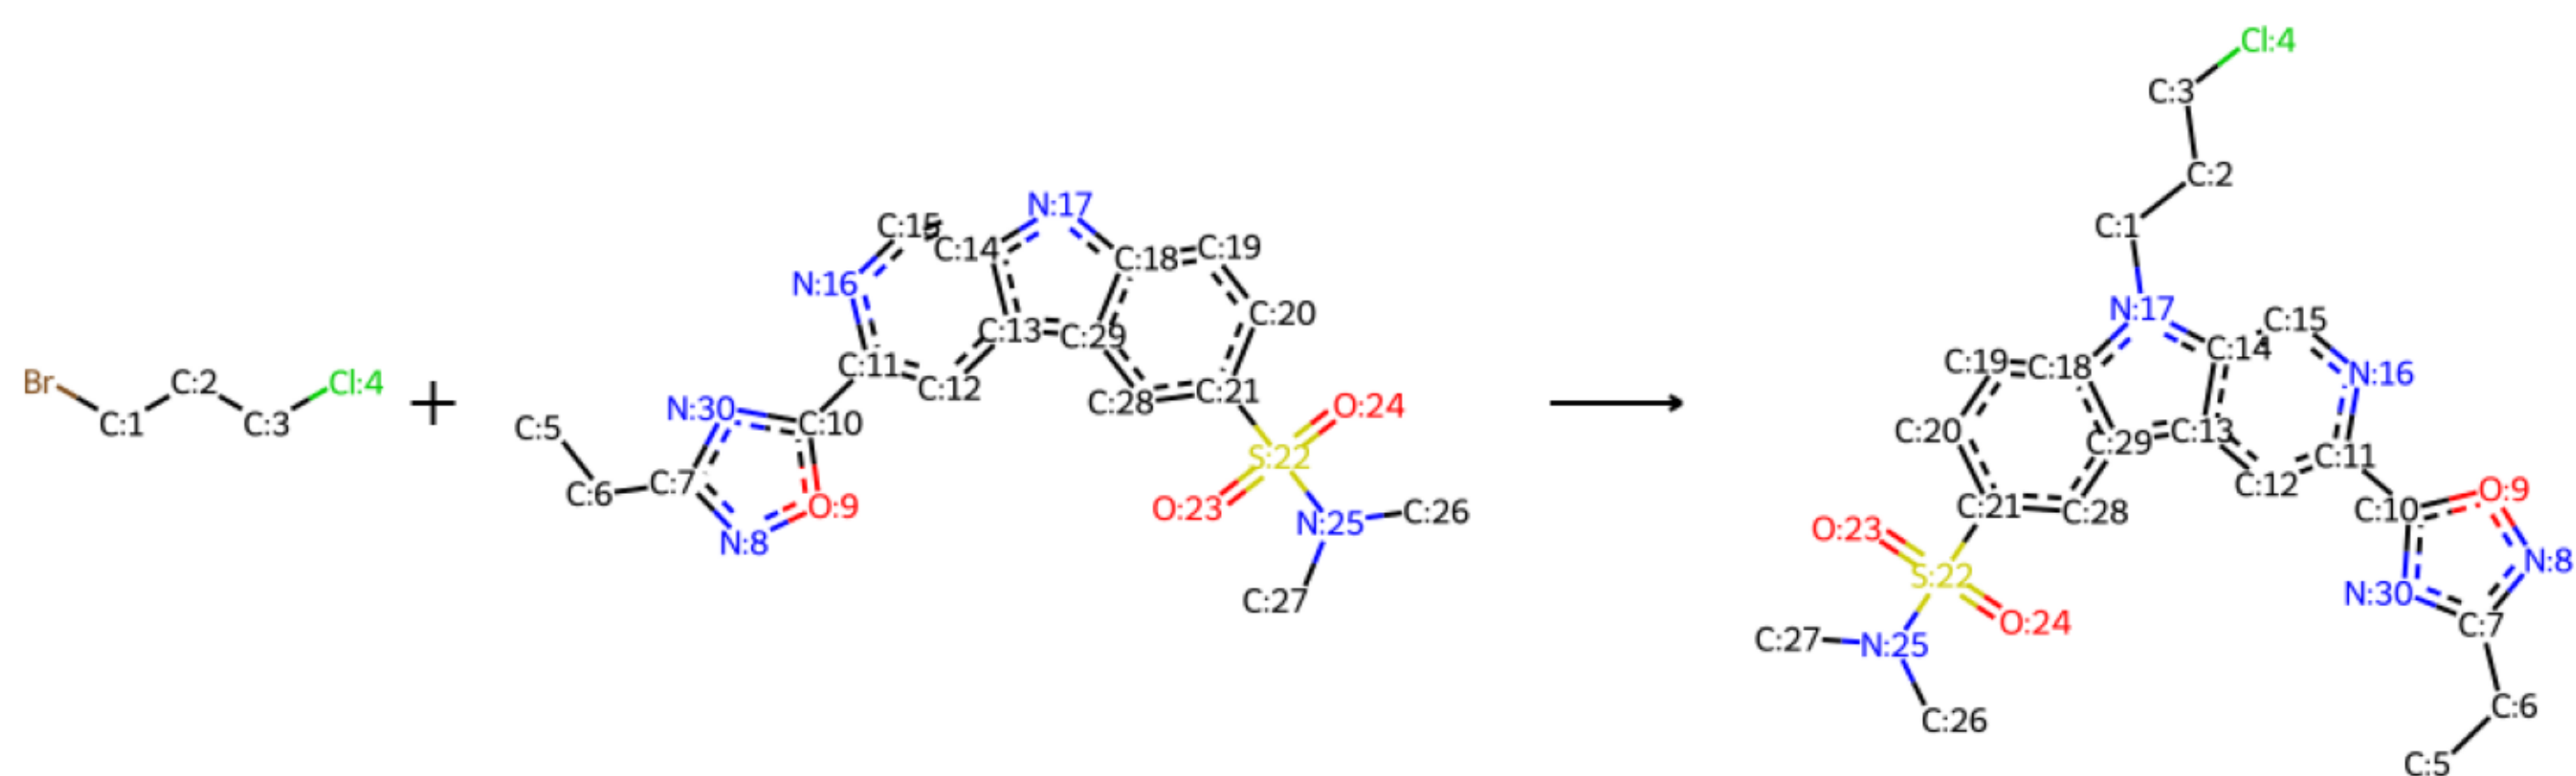

## ELECTRO-generated mechanistic pathway

[Arrow order: (1) green, (2) blue, (3) red, (4) orange]

step #1

Product(s)

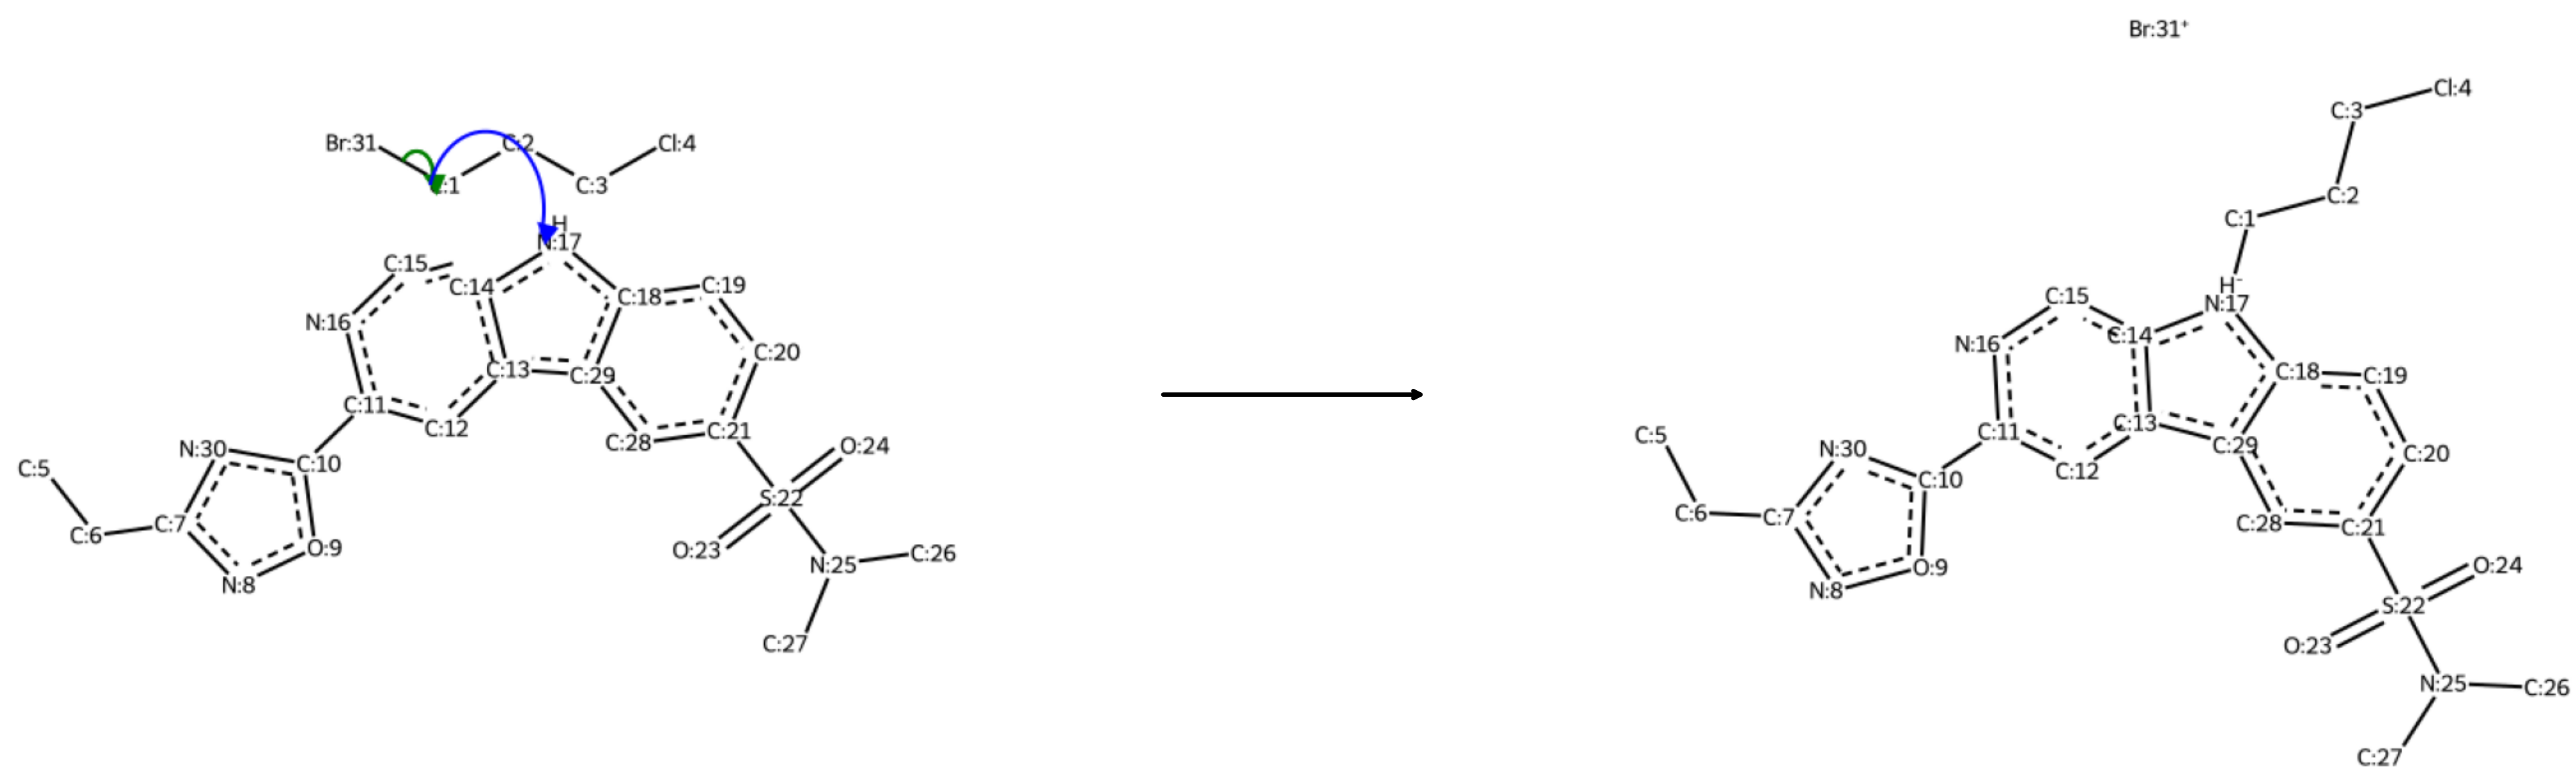

# Original reaction RXN\_ID:97

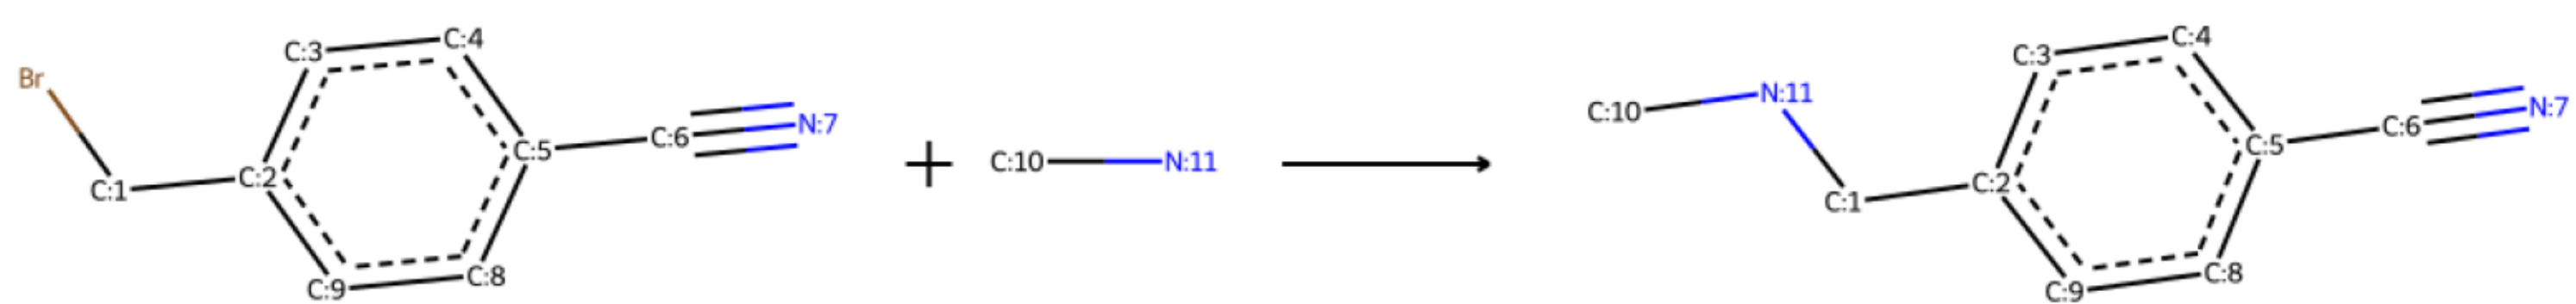

## ELECTRO-generated mechanistic pathway

[Arrow order: (1) green, (2) blue, (3) red, (4) orange]

step #1

Product(s)

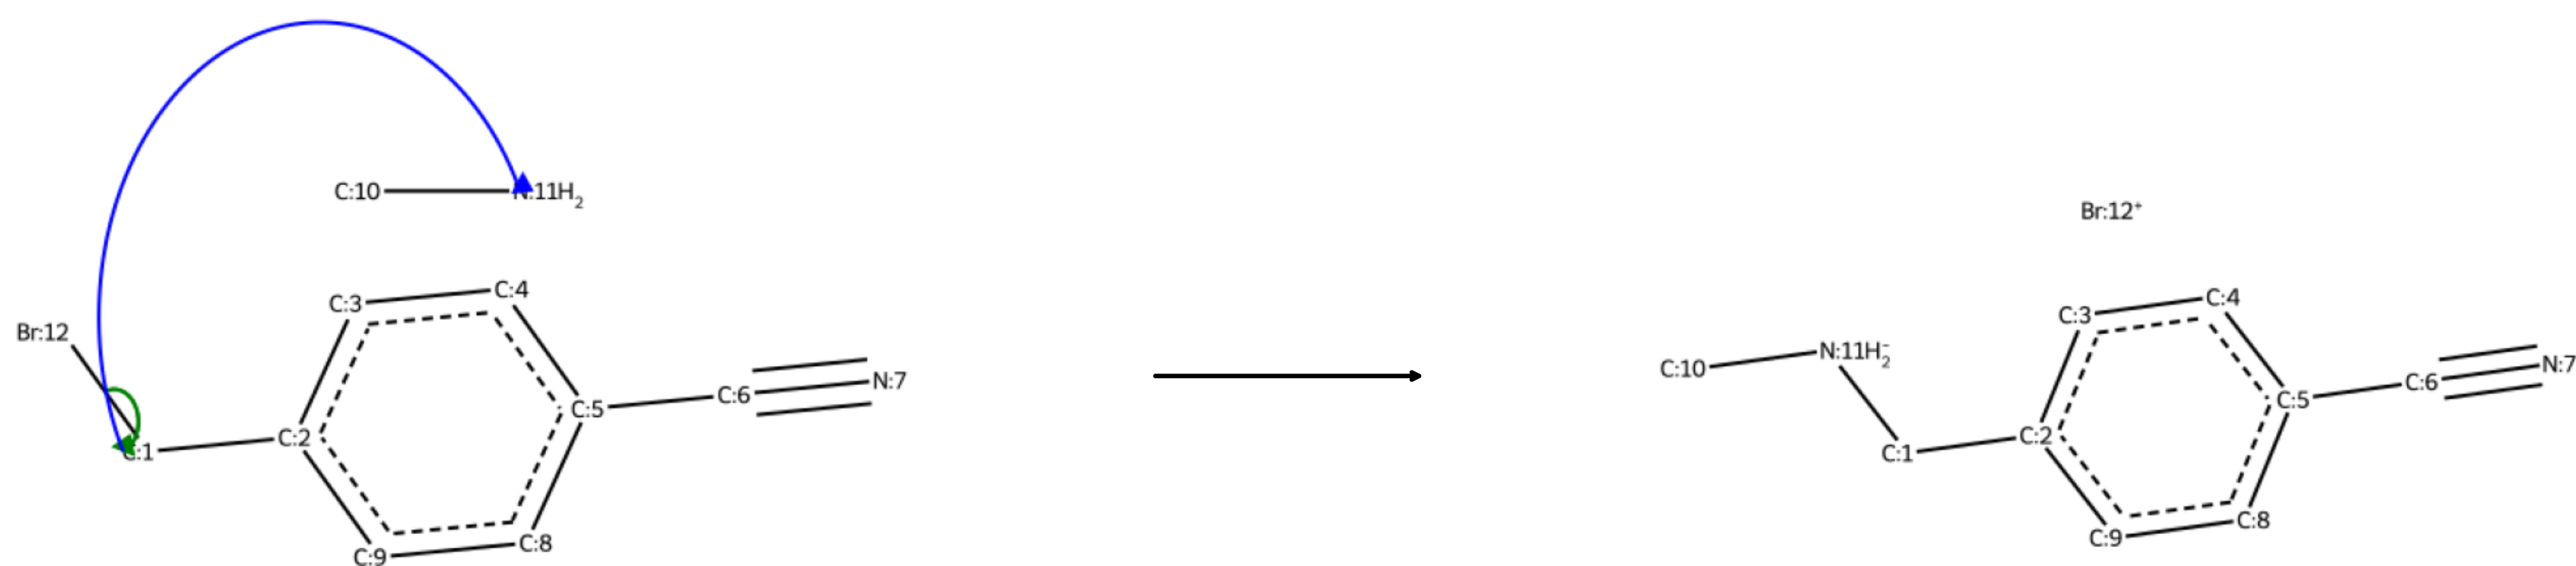



# Original reaction RXN\_ID:98

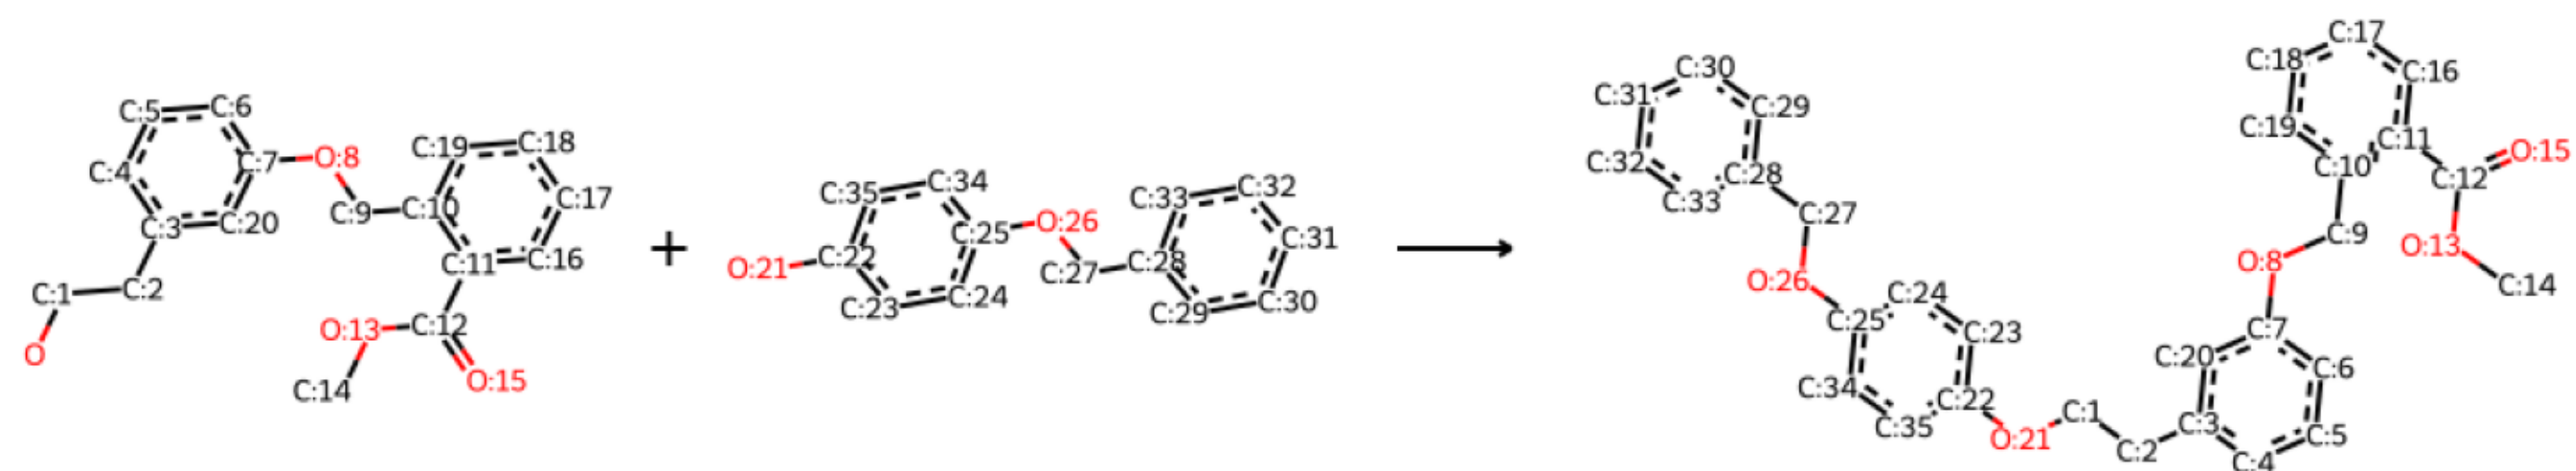

## ELECTRO-generated mechanistic pathway

[Arrow order: (1) green, (2) blue, (3) red, (4) orange]

step #1

Product(s)

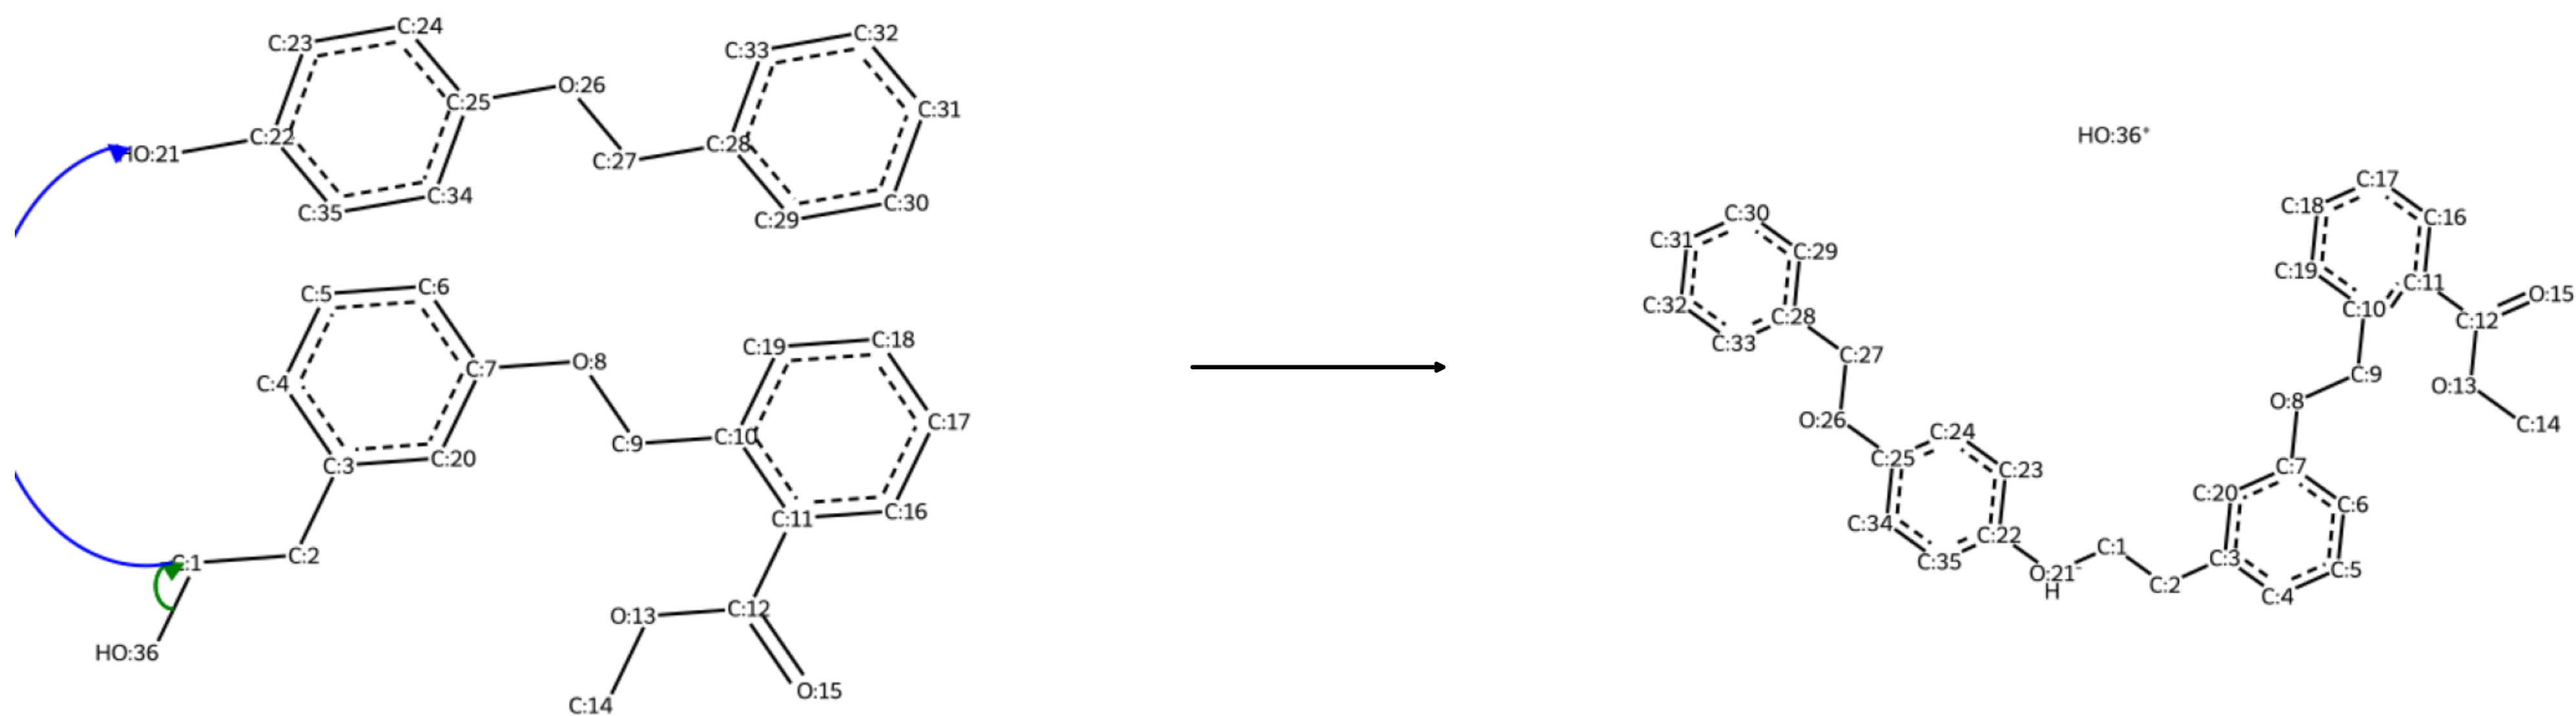

# Original reaction RXN\_ID:99

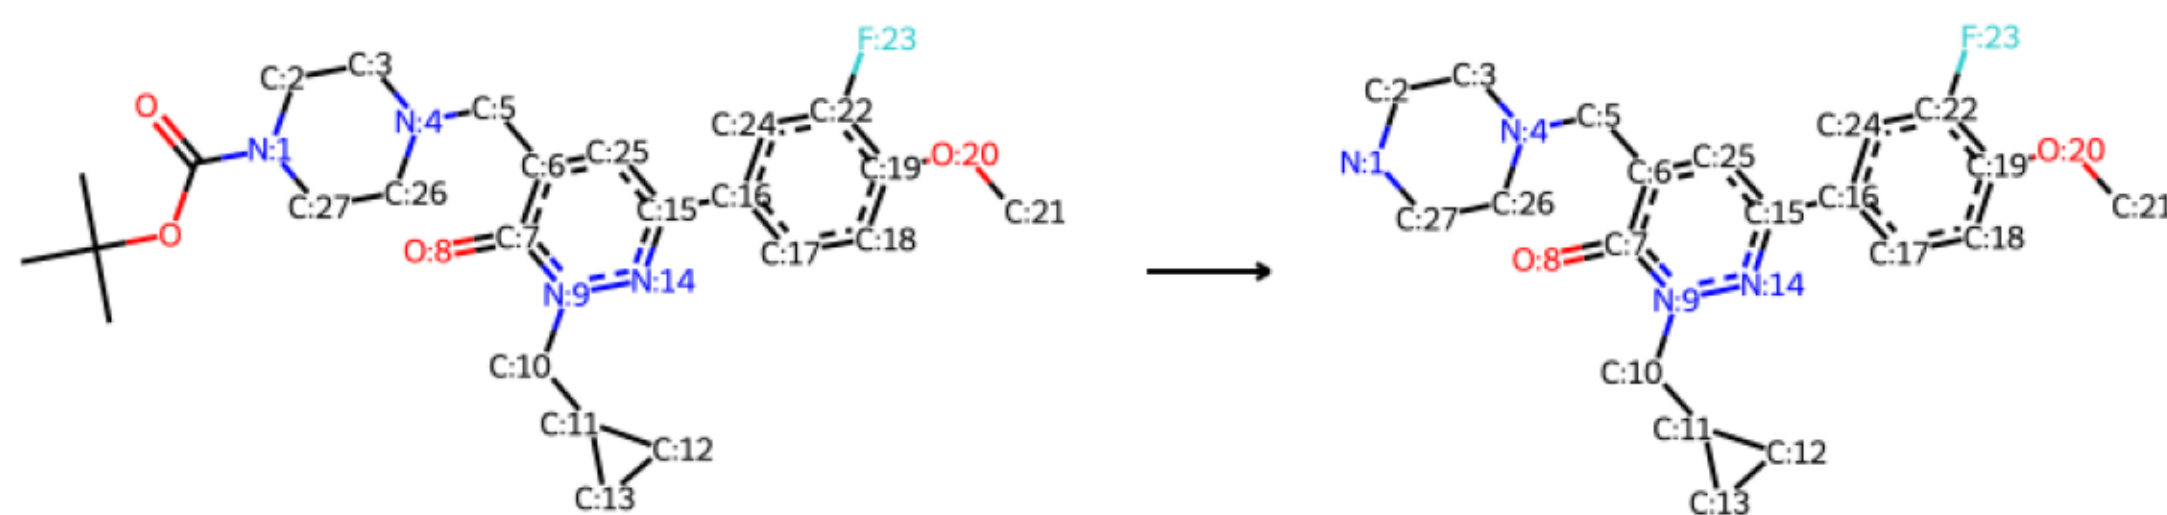

## ELECTRO-generated mechanistic pathway

[Arrow order: (1) green, (2) blue, (3) red, (4) orange]

step #1

Product(s)

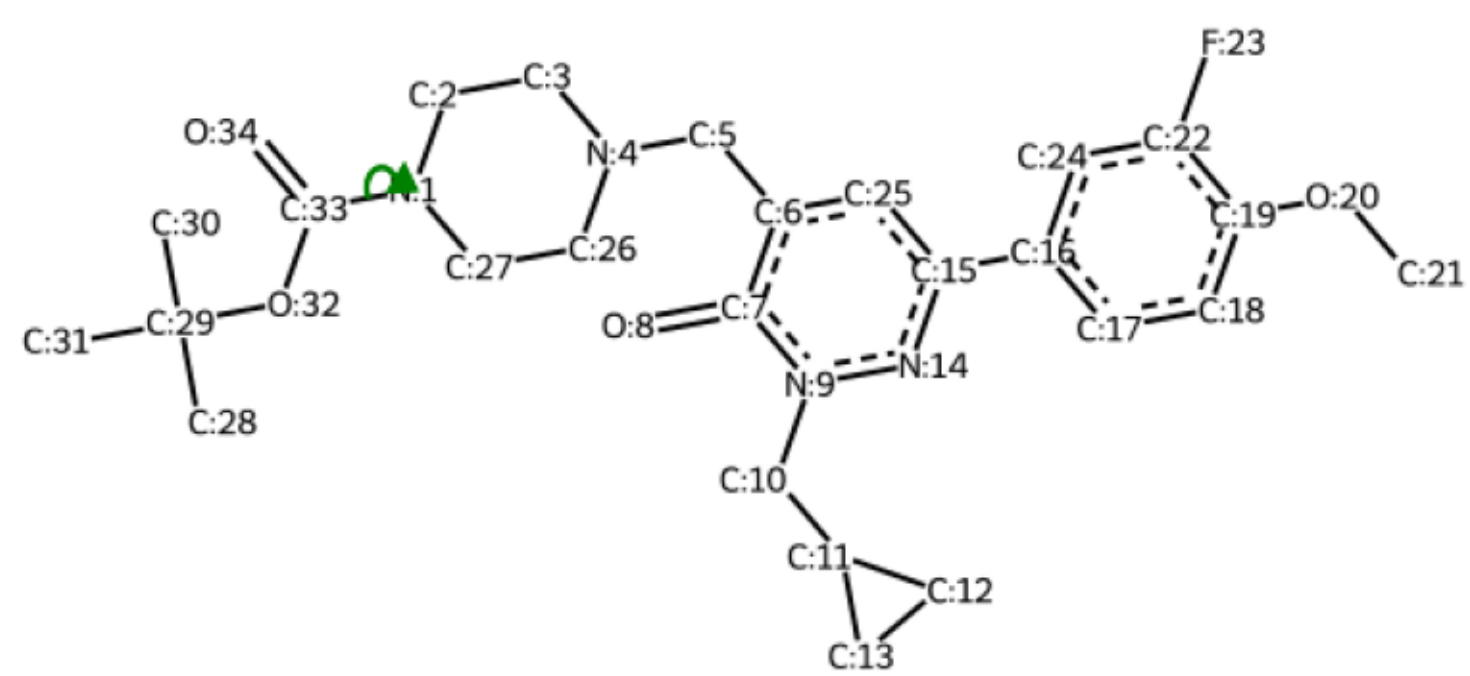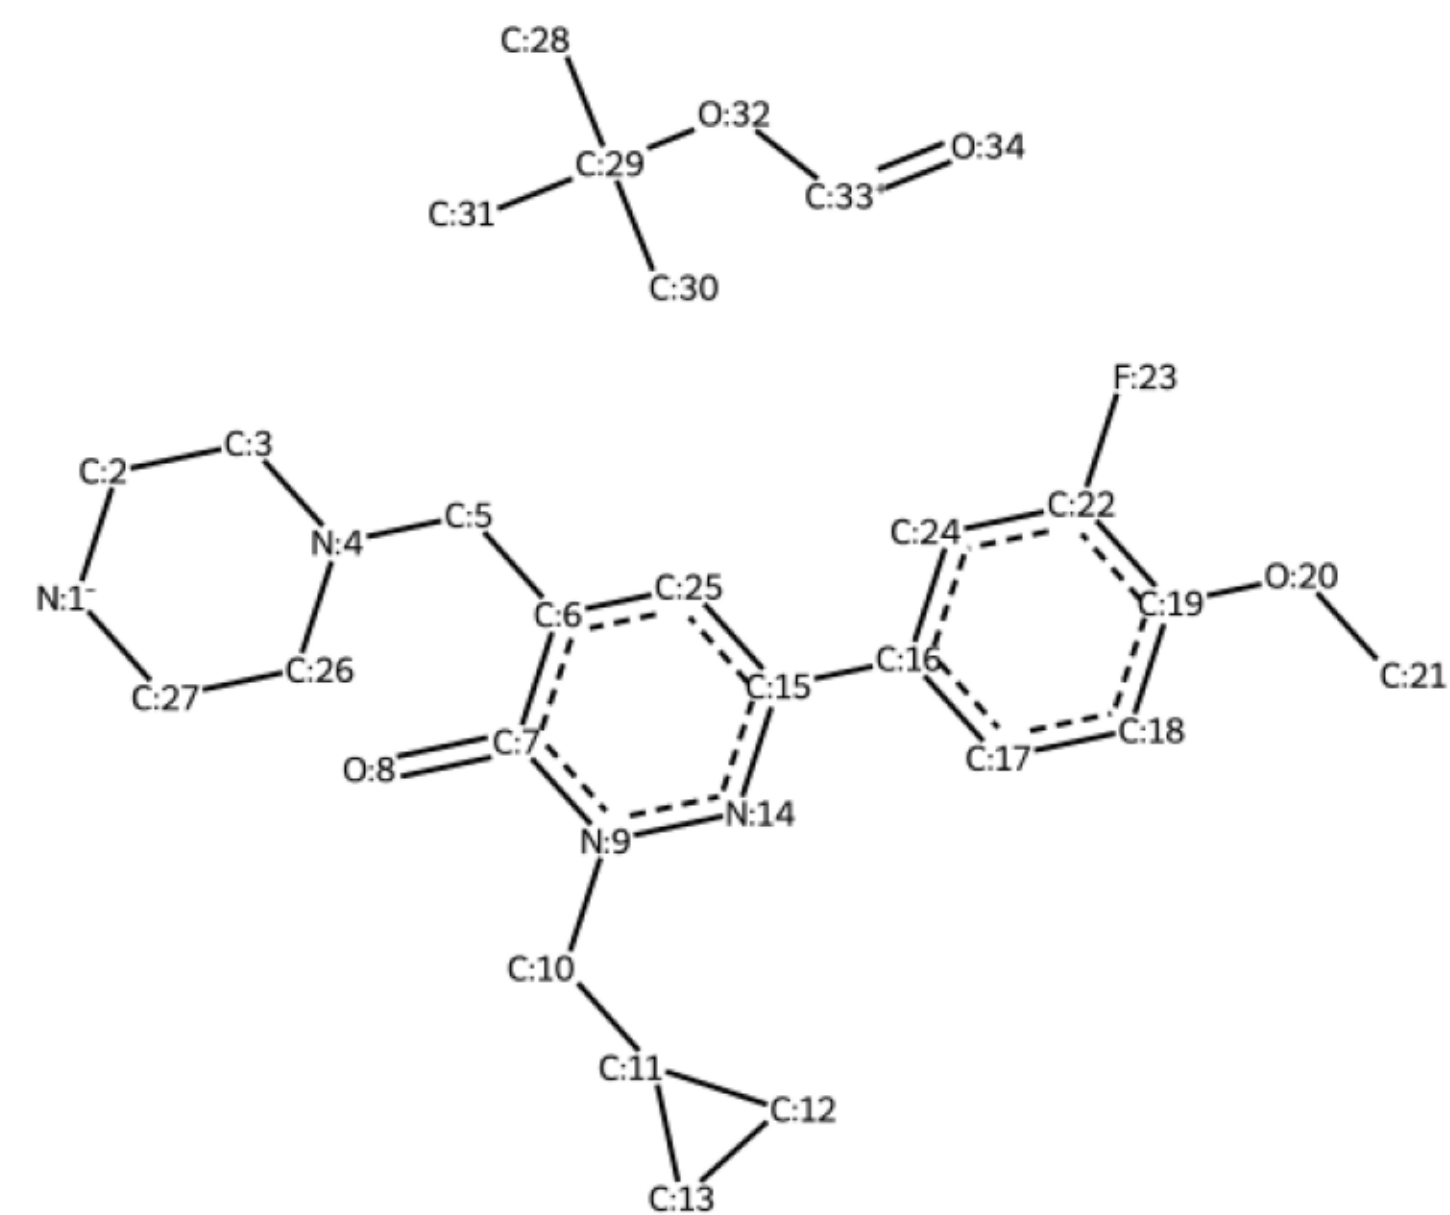

Supplement: supplementary_material [file attachment]
